# Supplementary material for: US exceptionalism? International trends in midlife mortality
Source: Int J Epidemiol. 2024 Mar 21;53(2):dyae024. doi: 10.1093/ije/dyae024 (PMC10954513; doi:10.1093/ije/dyae024)

## Supplementary Material

### Table of Contents

|                                                                                                                                   |    |
|-----------------------------------------------------------------------------------------------------------------------------------|----|
| List of Abbreviations and Definitions.....                                                                                        | 2  |
| Table S1 ICD9-ICD10 harmonization .....                                                                                           | 3  |
| Table S2 Availability of countries-years in mortality data .....                                                                  | 4  |
| Table S3 Availability of countries-years in population data.....                                                                  | 5  |
| Table S4 Countries-years with 4-digit ICD10 codes unavailable .....                                                               | 7  |
| Figure S1 Age-Standardized Mortality from Infectious and Parasitic Diseases, Years 1990–2019 .....                                | 8  |
| Figure S2 Age-Standardized Mortality from HIV/AIDS, Years 1990–2019 .....                                                         | 9  |
| Figure S3 Age-Standardized Mortality from Respiratory Diseases, Years 1990–2019 .....                                             | 10 |
| Figure S4 Age-Standardized Mortality from Trachea/Bronchus, Lung Cancers, Years 1990–2019 .....                                   | 11 |
| Figure S5 Age-Standardized Mortality from All Other Cancers, Years 1990–2019.....                                                 | 12 |
| Figure S6 Age-Standardized Mortality from Nervous System Diseases, Years 1990–2019.....                                           | 13 |
| Figure S7 Age-Standardized Mortality from Metabolic Diseases, Years 1990–2019.....                                                | 14 |
| Figure S8 Age-Standardized Mortality from Cardiovascular Disease, Years 1990–2019 .....                                           | 15 |
| Figure S9 Age-Standardized Mortality from Suicide, Years 1990–2019 .....                                                          | 16 |
| Figure S10 Age-Standardized Mortality from Homicide, Years 1990–2019 .....                                                        | 17 |
| Figure S11 Age-Standardized Mortality from Transport Accidents, Years 1990–2019 .....                                             | 18 |
| Figure S12 Age-Standardized Mortality from Other External Causes, Years 1990–2019 .....                                           | 19 |
| Figure S13 Age-Standardized Mortality from All Other Causes, Years 1990–2019 .....                                                | 20 |
| Figure S14 Age-Standardized Mortality from All Causes, Years 1990–2019.....                                                       | 21 |
| Figure S15 Age-Standardized Mortality from Drug-Related Causes, Years 2000–2019.....                                              | 22 |
| Figure S16 Age-Standardized Mortality from Alcohol-Related Causes, Years 2000–2019 .....                                          | 23 |
| Figure S17 Percent Change in Age-Standardized Mortality from the Baseline Year (1990), Infectious<br>and Parasitic Diseases ..... | 24 |
| Figure S18 Percent Change in Age-Standardized Mortality from the Baseline Year (1990), HIV/AIDS.....                              | 25 |
| Figure S19 Percent Change in Age-Standardized Mortality from the Baseline Year (1990), Respiratory<br>Diseases .....              | 26 |
| Figure S20 Percent Change in Age-Standardized Mortality from the Baseline Year (1990),<br>Trachea/Bronchus, Lung Cancers .....    | 27 |
| Figure S21 Percent Change in Age-Standardized Mortality from the Baseline Year (1990), All Other<br>Cancers .....                 | 28 |
| Figure S22 Percent Change in Age-Standardized Mortality from the Baseline Year (1990), Nervous<br>System .....                    | 29 |
| Figure S23 Percent Change in Age-Standardized Mortality from the Baseline Year (1990), Metabolic<br>Diseases.....                 | 30 |
| Figure S24 Percent Change in Age-Standardized Mortality from the Baseline Year (1990),<br>Cardiovascular Disease .....            | 31 |

|                                                                                                                                |        |
|--------------------------------------------------------------------------------------------------------------------------------|--------|
| Figure S25 Percent Change in Age–Standardized Mortality from the Baseline Year (2000), Suicide .....                           | 32     |
| Figure S26 Percent Change in Age–Standardized Mortality from the Baseline Year (2000), Homicide .....                          | 33     |
| Figure S27 Percent Change in Age–Standardized Mortality from the Baseline Year (1990), Transport<br>Accidents .....            | 34     |
| Figure S28 Percent Change in Age–Standardized Mortality from the Baseline Year (1990), Other<br>External Causes Diseases ..... | 35     |
| Figure S29 Percent Change in Age–Standardized Mortality from the Baseline Year (1990), All Other<br>Causes.....                | 36     |
| Figure S30 Percent Change in Age–Standardized Mortality from the Baseline Year (1990), All Causes.....                         | 37     |
| Figure S31 Percent Change in Age–Standardized Mortality from the Baseline Year (2000), Drug-<br>Related Causes .....           | 38     |
| Figure S32 Percent Change in Age–Standardized Mortality from the Baseline Year (2000), Alcohol-<br>Related Causes .....        | 39     |
| Figure S33 Percent Change in All–Cause Mortality Between 1990 and 2019/Males, Ages 25–44.....                                  | 40     |
| Figure S34 Percent Change in All–Cause Mortality Between 1990 and 2019/Males, Ages 45–54.....                                  | 41     |
| Figure S35 Percent Change in All–Cause Mortality Between 1990 and 2019/Males, Ages 55–64.....                                  | 42     |
| Figure S36 Percent Change in All–Cause Mortality Between 1990 and 2019/Females, Ages 25–44 .....                               | 43     |
| Figure S37 Percent Change in All–Cause Mortality Between 1990 and 2019/Females, Ages 45–54 .....                               | 44     |
| Figure S38 Percent Change in All–Cause Mortality Between 1990 and 2019/Females, Ages 55–64 .....                               | 45     |
| Figures S39-S134 Three-year moving average mortality figures by country, cause, sex and age .....                              | 46-141 |

## List of Abbreviations and Definitions

### Abbreviations

|                 |                                                                                 |
|-----------------|---------------------------------------------------------------------------------|
| <b>AIDS</b>     | Acquired Immune Deficiency Syndrome                                             |
| <b>CEE</b>      | Central and Eastern European country                                            |
| <b>HIV</b>      | Human Immunodeficiency Virus                                                    |
| <b>ICD9 BTL</b> | International Classification of Diseases, Ninth Revision, Basic Tabulation List |
| <b>ICD10</b>    | International Classification of Diseases, Tenth Revision                        |
| <b>UK</b>       | United Kingdom                                                                  |
| <b>US</b>       | United States                                                                   |

### Definitions

|             |                                              |
|-------------|----------------------------------------------|
| <b>Peer</b> | A high-income country comparable to the USA. |
|-------------|----------------------------------------------|

**Table S1. ICD9 BTL - ICD10 harmonization.**

| Categories                                                       | ICD9 BTLcodes                           | ICD10 codes                                                       | Notes                                                                                                                                                                                                                    |
|------------------------------------------------------------------|-----------------------------------------|-------------------------------------------------------------------|--------------------------------------------------------------------------------------------------------------------------------------------------------------------------------------------------------------------------|
| Infectious and parasitic (excluding HIV/AIDS)                    | B01 - B07                               | A00 - A99, B00 - B19, B25 -B99                                    |                                                                                                                                                                                                                          |
| HIV/AIDS                                                         | B184, B185                              | B20 - B24                                                         |                                                                                                                                                                                                                          |
| Respiratory system                                               | B31 - B32                               | J00 - J98                                                         |                                                                                                                                                                                                                          |
| All cancers (excluding trachea/bronchus, lung and liver cancers) | B08 - B09, B10, B100, B109, B11 - B17   | C00 - D48, excluding C33, C34                                     |                                                                                                                                                                                                                          |
| Trachea/ bronchus, lung cancers                                  | B101                                    | C33 -- C34                                                        |                                                                                                                                                                                                                          |
| Nervous system                                                   | B22                                     | G00 - G98                                                         |                                                                                                                                                                                                                          |
| Endocrine, Nutritional & Metabolic                               | B180-B183, B189, B19                    | E00 - E88                                                         |                                                                                                                                                                                                                          |
| Circulatory system                                               | B25 – B30                               | I00 - I99                                                         |                                                                                                                                                                                                                          |
| Suicide                                                          | B54                                     | X60–X84, Y87.0                                                    |                                                                                                                                                                                                                          |
| Drug poisoning                                                   | N/A in ICD9 BTL coding scheme           | F11-F16, F18-F19, X40–X44, X85, Y10–Y14                           | Due to ICD9 BTL scheme limitations this category is only kept for country-years where ICD10 scheme is available. For country-years with ICD9 BTL scheme drug-related deaths are set to 'other external causes' category. |
| Alcohol-induced                                                  | N/A in ICD9 BTL coding scheme           | K70, K73-74, F10, X45, Y15                                        | Due to ICD9 BTL scheme limitations this category is only kept for country-years where ICD10 scheme is available. For country-years with ICD9 BTL scheme drug-related deaths are set to 'other external causes' category. |
| Homicide                                                         | B55                                     | X86 - X99, Y00 - Y09, Y87.1                                       |                                                                                                                                                                                                                          |
| Transport accidents                                              | B47                                     | V01–V99, Y85                                                      |                                                                                                                                                                                                                          |
| Other external causes                                            | B480-B482, B49, B50, B51, B52, B53, B56 | W00–W99, X00–X39, X46–X59, Y16–Y36, Y40–Y84, Y86, Y87.2, Y88, Y89 |                                                                                                                                                                                                                          |

ICD9 BTL, International Classification of Diseases, Ninth Revision, Basic Tabulation List; ICD 10, International Classification of Diseases, Tenth Revision; HIV, Human Immunodeficiency Virus; AIDS, Acquired Immune Deficiency Syndrome.

**Table S2. Availability of countries-years in mortality data as of 1<sup>st</sup> June 2023.**Source: <https://www.who.int/data/data-collection-tools/who-mortality-database>

| Country Code | Name                     | Year                                                 | List                         | Icd                                 | Note                                                                                                 |
|--------------|--------------------------|------------------------------------------------------|------------------------------|-------------------------------------|------------------------------------------------------------------------------------------------------|
| 2090         | Canada                   | 1979-1999<br>2000-2019                               | 09B<br>104                   | Icd9<br>Icd10                       |                                                                                                      |
| 2450         | United States of America | 1979-1998<br>1999-2019                               | 09B<br>104                   | Icd9<br>Icd10                       |                                                                                                      |
| 3160         | Japan                    | 1979-1994<br>1995-2017<br>2018-2019                  | 09B<br>104<br>103            | Icd9<br>Icd10<br>Icd10              |                                                                                                      |
| 4010         | Austria                  | 1980-2001<br>2002-2019                               | 09B<br>104                   | Icd9<br>Icd10                       |                                                                                                      |
| 4020         | Belgium                  | 1979-1997<br>1998-1999<br>2000-2018                  | 09B<br>103<br>104            | Icd9<br>Icd10<br>Icd10              |                                                                                                      |
| 4050         | Denmark                  | 1994-2019                                            | 104                          | Icd10                               |                                                                                                      |
| 4070         | Finland                  | 1987-1994<br>1996-2019                               | 09B<br>103                   | Icd9<br>Icd10                       |                                                                                                      |
| 4080         | France                   | 1979-1999<br>2000-2017                               | 09B<br>104                   | Icd9<br>Icd10                       |                                                                                                      |
| 4085         | Germany                  | 1990-1997<br>1998-2019                               | 09B<br>104                   | Icd9<br>Icd10                       |                                                                                                      |
| 4180         | Italy                    | 1979-2002<br>2003-2019                               | 09B<br>104                   | Icd9<br>Icd10                       |                                                                                                      |
| 4210         | Netherlands              | 1979-1995<br>1996-1999<br>2000-2019                  | 09B<br>10M<br>104            | Icd9<br>Icd10<br>Icd10              |                                                                                                      |
| 4220         | Norway                   | 1986-1995<br>1996-2016                               | 09B<br>104                   | Icd9<br>Icd10                       |                                                                                                      |
| 4240         | Portugal                 | 1980-2001<br>2002-2003<br>2004-2005<br><br>2007-2019 | 09B<br>104<br>UE1<br><br>104 | Icd9<br>Icd10<br>Icd10<br><br>Icd10 | Mortality data for 2004-2005 are not disaggregated by age; mortality data are not available for 2006 |
| 4280         | Spain                    | 1980-1998<br>1999-2019                               | 09B<br>104                   | Icd9<br>Icd10                       |                                                                                                      |
| 4290         | Sweden                   | 1987-1996<br>1997-1998<br>1999-2018                  | 09B<br>10M<br>104            | Icd9<br>Icd10<br>Icd10              |                                                                                                      |
| 4300         | Switzerland              | 1995-2019                                            | 104                          | Icd10                               |                                                                                                      |
| 4308         | United Kingdom           | 1979-1999<br>2001-2019                               | 09B<br>104                   | Icd9<br>Icd10                       | Mortality data are not available for 2000                                                            |
| 5020         | Australia                | 1979-1997<br>1998-2019                               | 09B<br>104                   | Icd9<br>Icd10                       | Mortality data are not                                                                               |

|      |                |                                         |                       |                            |                              |
|------|----------------|-----------------------------------------|-----------------------|----------------------------|------------------------------|
|      |                |                                         |                       |                            | available for 2005           |
| 4030 | Bulgaria       | 1980-2004<br>2005-2019                  | 09B<br>104            | Icd9<br>Icd10              |                              |
| 4045 | Czech Republic | 1986-1993<br>1994-2019                  | 09B<br>104            | Icd9<br>Icd10              |                              |
| 4150 | Hungary        | 1979-1995<br>1996-2019                  | 09B<br>104            | Icd9<br>Icd10              |                              |
| 4230 | Poland         | 1980-1996<br><br>1999-2019              | 09B<br><br>104        | Icd9<br><br>Icd10          | No data for 1997-1998        |
| 4270 | Romania        | 1980-1998<br>1999-2019                  | 09B<br>104            | Icd9<br>Icd10              |                              |
| 4274 | Slovakia       | 1992-1993<br><br>1994-2009<br>2010-2019 | 09B<br><br>103<br>104 | Icd9<br><br>Icd10<br>Icd10 | No data for 1990, 2011, 2015 |
| 4276 | Slovenia       | 1985-1996<br>1997-2019                  | 09B<br>103            | Icd9<br>Icd10              |                              |

Icd9, International Classification of Diseases, Ninth Revision; Icd10, International Classification of Diseases, Tenth Revision.

**Table S3. Availability of countries-years (1990-2019) on population data as of 1<sup>st</sup> June 2023.**

Source: <https://www.who.int/data/data-collection-tools/who-mortality-database>

| Country Code | Name                     | Year           | Note                                                                                                                  | Link                                                                                                                                                                                                                                                                                                                              |
|--------------|--------------------------|----------------|-----------------------------------------------------------------------------------------------------------------------|-----------------------------------------------------------------------------------------------------------------------------------------------------------------------------------------------------------------------------------------------------------------------------------------------------------------------------------|
| 2090         | Canada                   | 1990-2005      | Data for 2006-2019 are unavailable; extract from Statistics Canada instead                                            | <a href="https://www150.statcan.gc.ca/t1/tbl1/en/cv.action?pid=1710000501">https://www150.statcan.gc.ca/t1/tbl1/en/cv.action?pid=1710000501</a>                                                                                                                                                                                   |
| 2450         | United States of America | 1990-2007      | Data for 2008-2019 are unavailable; extract from US Census Bureau instead                                             | <a href="https://www.census.gov/programs-surveys/popest/technical-documentation/research/evaluation-estimates/2020-evaluation-estimates/2010s-national-detail.html">https://www.census.gov/programs-surveys/popest/technical-documentation/research/evaluation-estimates/2020-evaluation-estimates/2010s-national-detail.html</a> |
| 3160         | Japan                    | 1990-2019      |                                                                                                                       |                                                                                                                                                                                                                                                                                                                                   |
| 4010         | Austria                  | 1990-2019      |                                                                                                                       |                                                                                                                                                                                                                                                                                                                                   |
| 4020         | Belgium                  | 1990-2019      |                                                                                                                       |                                                                                                                                                                                                                                                                                                                                   |
| 4050         | Denmark                  | 1990-2019      |                                                                                                                       |                                                                                                                                                                                                                                                                                                                                   |
| 4070         | Finland                  | 1990-2019      |                                                                                                                       |                                                                                                                                                                                                                                                                                                                                   |
| 4080         | France                   | 1990-2014,2017 | Data for 2015-2016 are unavailable; extract from France National Institute of Statistics and Economic Studies instead | <a href="https://www.insee.fr/en/statistiques/pyramide/3312960/xls/pyramides-des-ages_bilan-demo_2019.xls">https://www.insee.fr/en/statistiques/pyramide/3312960/xls/pyramides-des-ages_bilan-demo_2019.xls</a>                                                                                                                   |

|      |                |           |                   |  |
|------|----------------|-----------|-------------------|--|
| 4085 | Germany        | 1990-2019 |                   |  |
| 4180 | Italy          | 1990-2019 |                   |  |
| 4210 | Netherlands    | 1990-2019 |                   |  |
| 4220 | Norway         | 1990-2019 |                   |  |
| 4240 | Portugal       | 1990-2018 |                   |  |
| 4280 | Spain          | 1990-2019 |                   |  |
| 4290 | Sweden         | 1990-2018 |                   |  |
| 4300 | Switzerland    | 1990-2019 |                   |  |
| 4308 | United Kingdom | 1990-2019 |                   |  |
| 5020 | Australia      | 1990-2019 |                   |  |
| 4030 | Bulgaria       | 1990-2019 |                   |  |
| 4045 | Czech Republic | 1990-2019 |                   |  |
| 4150 | Hungary        | 1990-2019 |                   |  |
| 4230 | Poland         | 1990-2019 |                   |  |
| 4270 | Romania        | 1990-2019 |                   |  |
| 4274 | Slovakia       | 1990-2019 | Year 2015 missing |  |
| 4276 | Slovenia       | 1990-2019 |                   |  |

**Table S4. Countries-years for which ICD10 4-digit codes are unavailable.**

| Country  | Year |
|----------|------|
| Japan    | 2018 |
| Bulgaria | 2008 |
| Bulgaria | 2009 |
| Bulgaria | 2010 |
| Bulgaria | 2011 |
| Bulgaria | 2012 |
| Finland  | 2008 |
| Finland  | 2009 |
| Finland  | 2010 |
| Finland  | 2011 |
| Finland  | 2012 |
| Finland  | 2013 |
| Finland  | 2014 |
| Finland  | 2015 |
| Finland  | 2016 |
| Finland  | 2017 |
| Finland  | 2018 |
| Slovakia | 2008 |
| Slovakia | 2009 |
| Slovenia | 2008 |
| Slovenia | 2009 |
| Slovenia | 2010 |
| Slovenia | 2011 |
| Slovenia | 2012 |
| Slovenia | 2013 |
| Slovenia | 2014 |
| Slovenia | 2015 |
| Slovenia | 2016 |
| Slovenia | 2017 |
| Slovenia | 2018 |
| Slovenia | 2019 |
| Slovenia | 2020 |

ICD 10, International Classification of Diseases, Tenth Revision

**Figure S1. Age-Standardized Mortality from Infectious and Parasitic Diseases, Years 1990-2019**

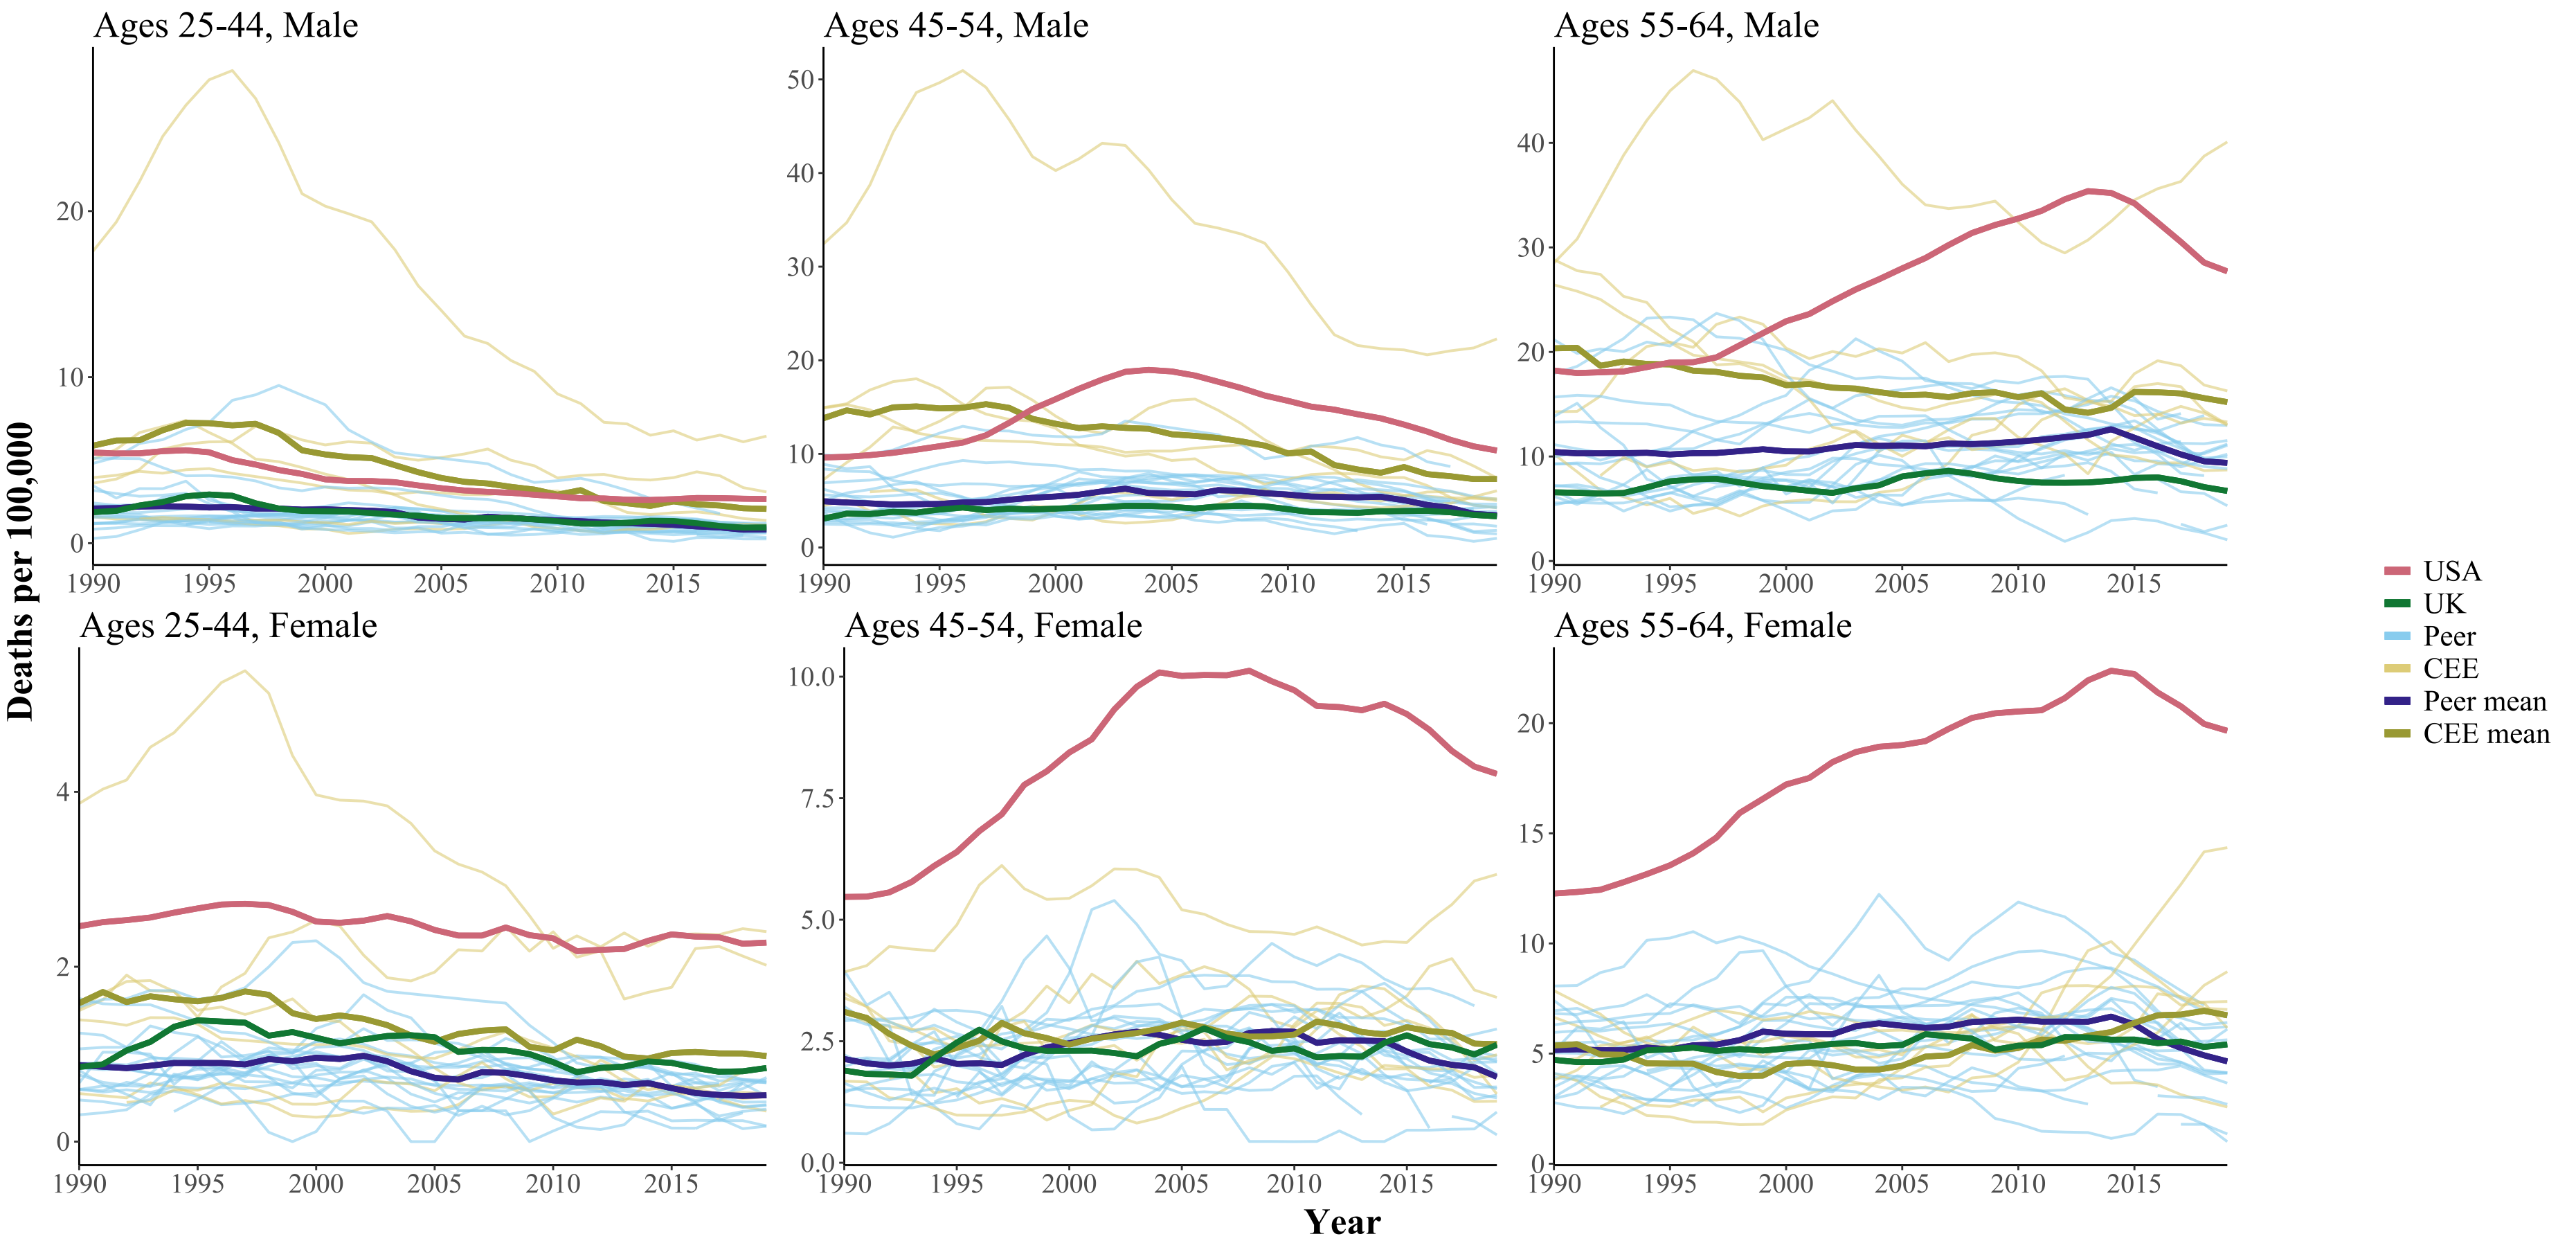

**Figure S2. Age-Standardized Mortality from HIV/AIDS, Years 1990-2019**

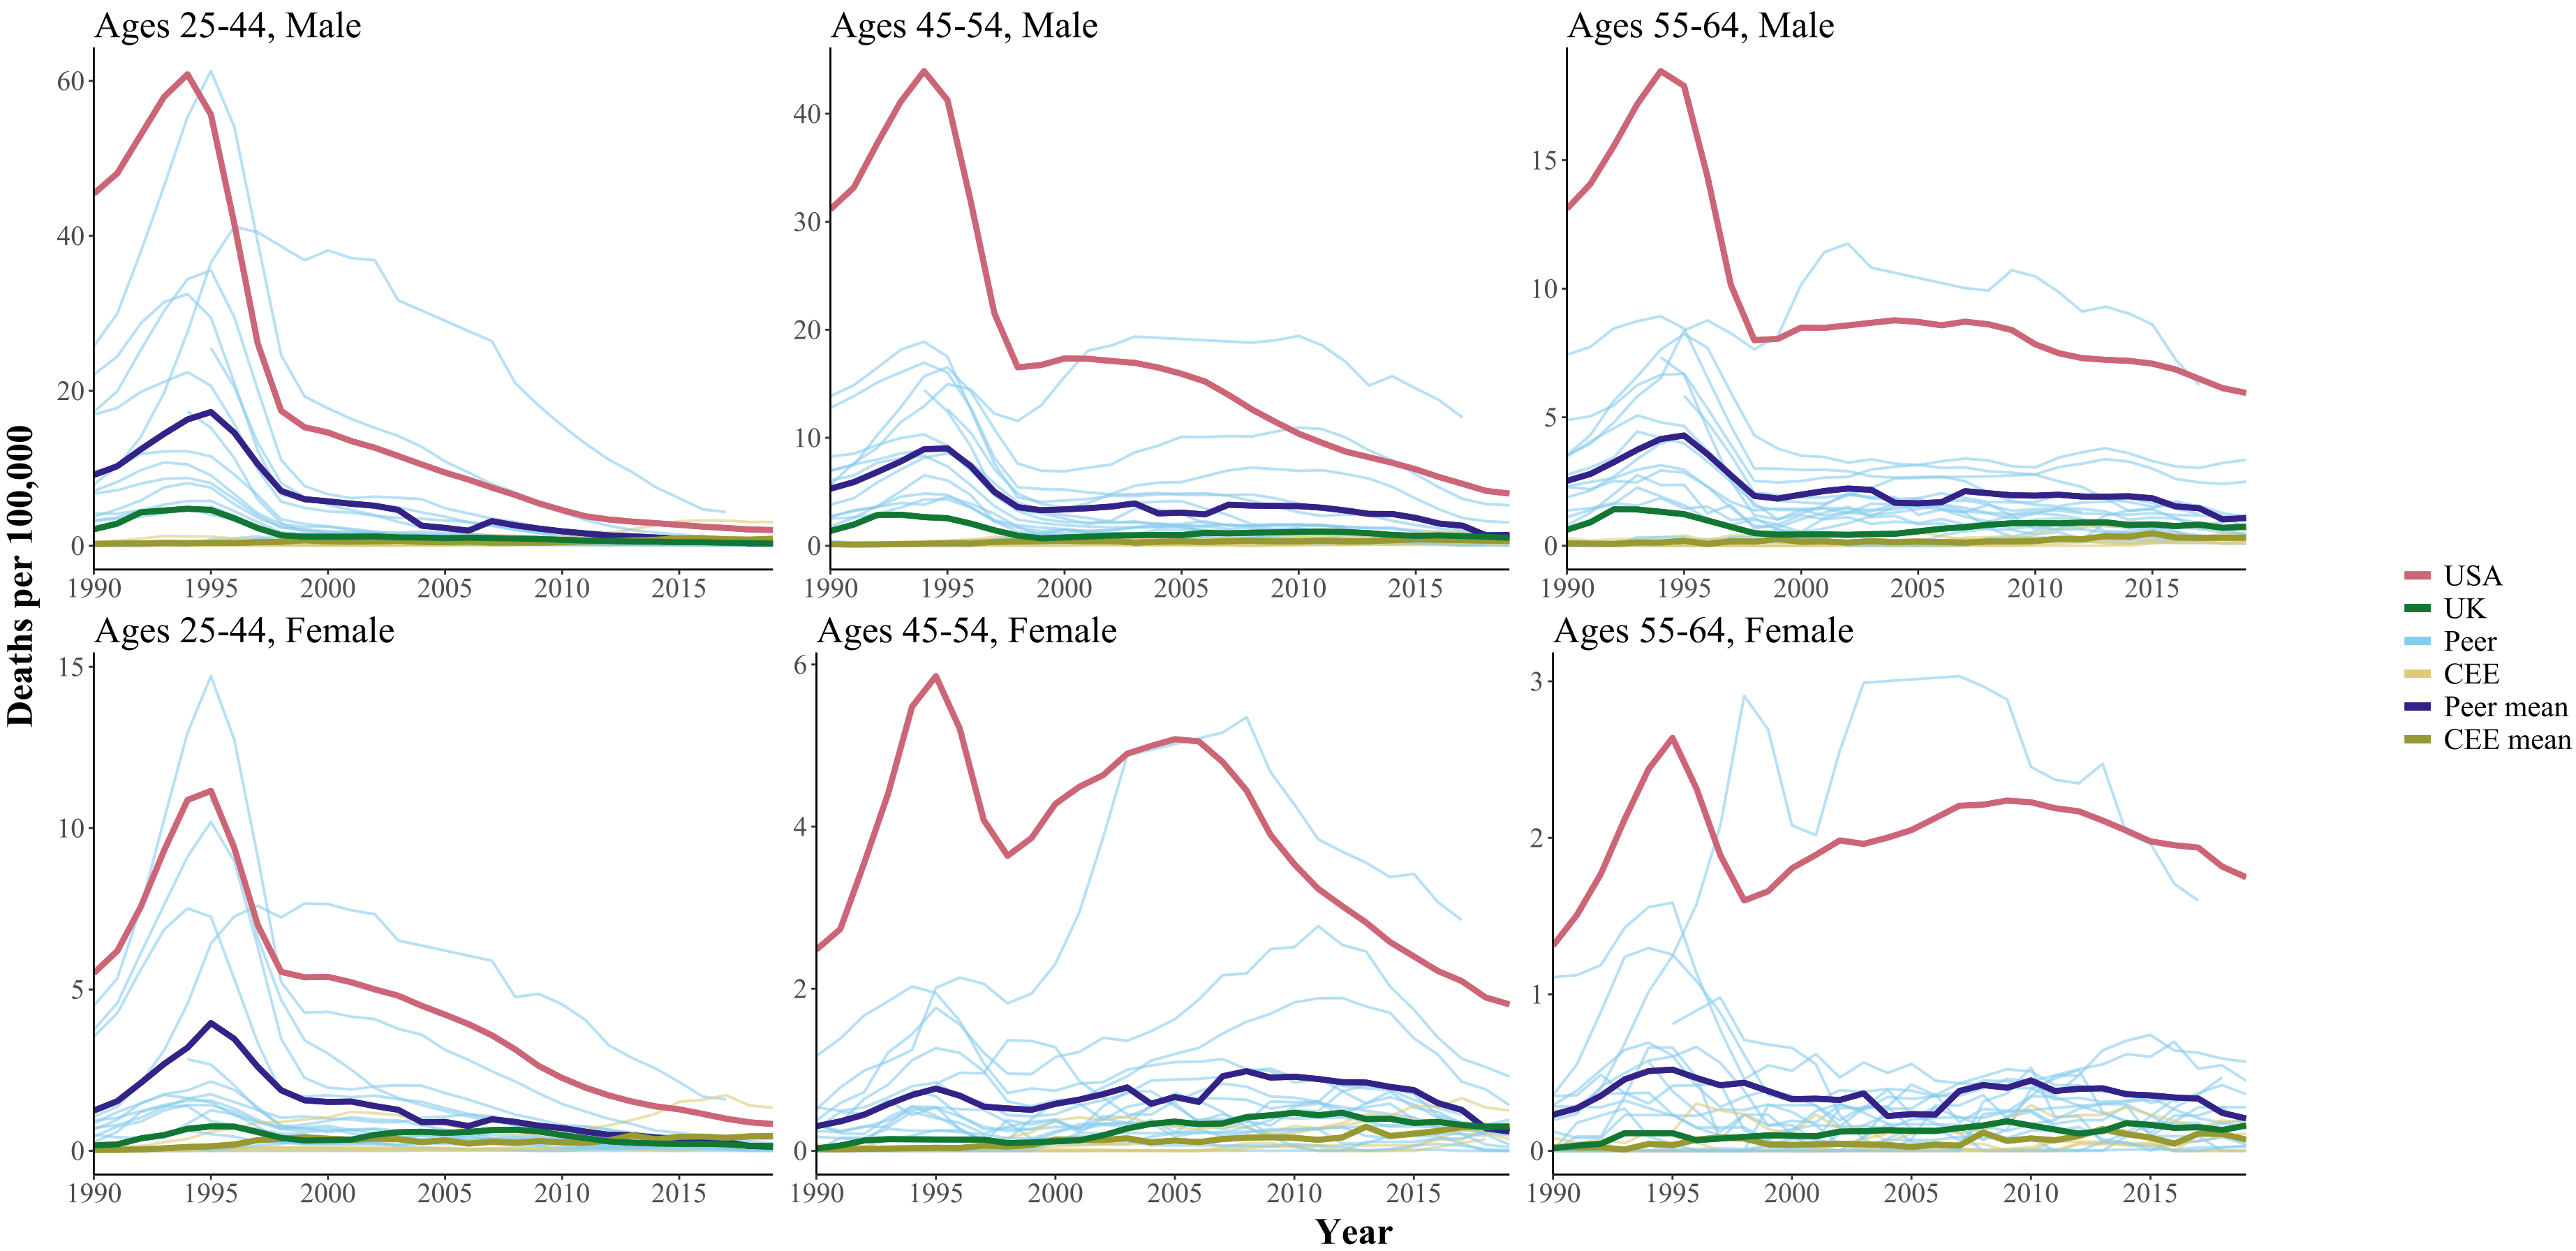

**Figure S3. Age-Standardized Mortality from Respiratory Diseases, Years 1990-2019**

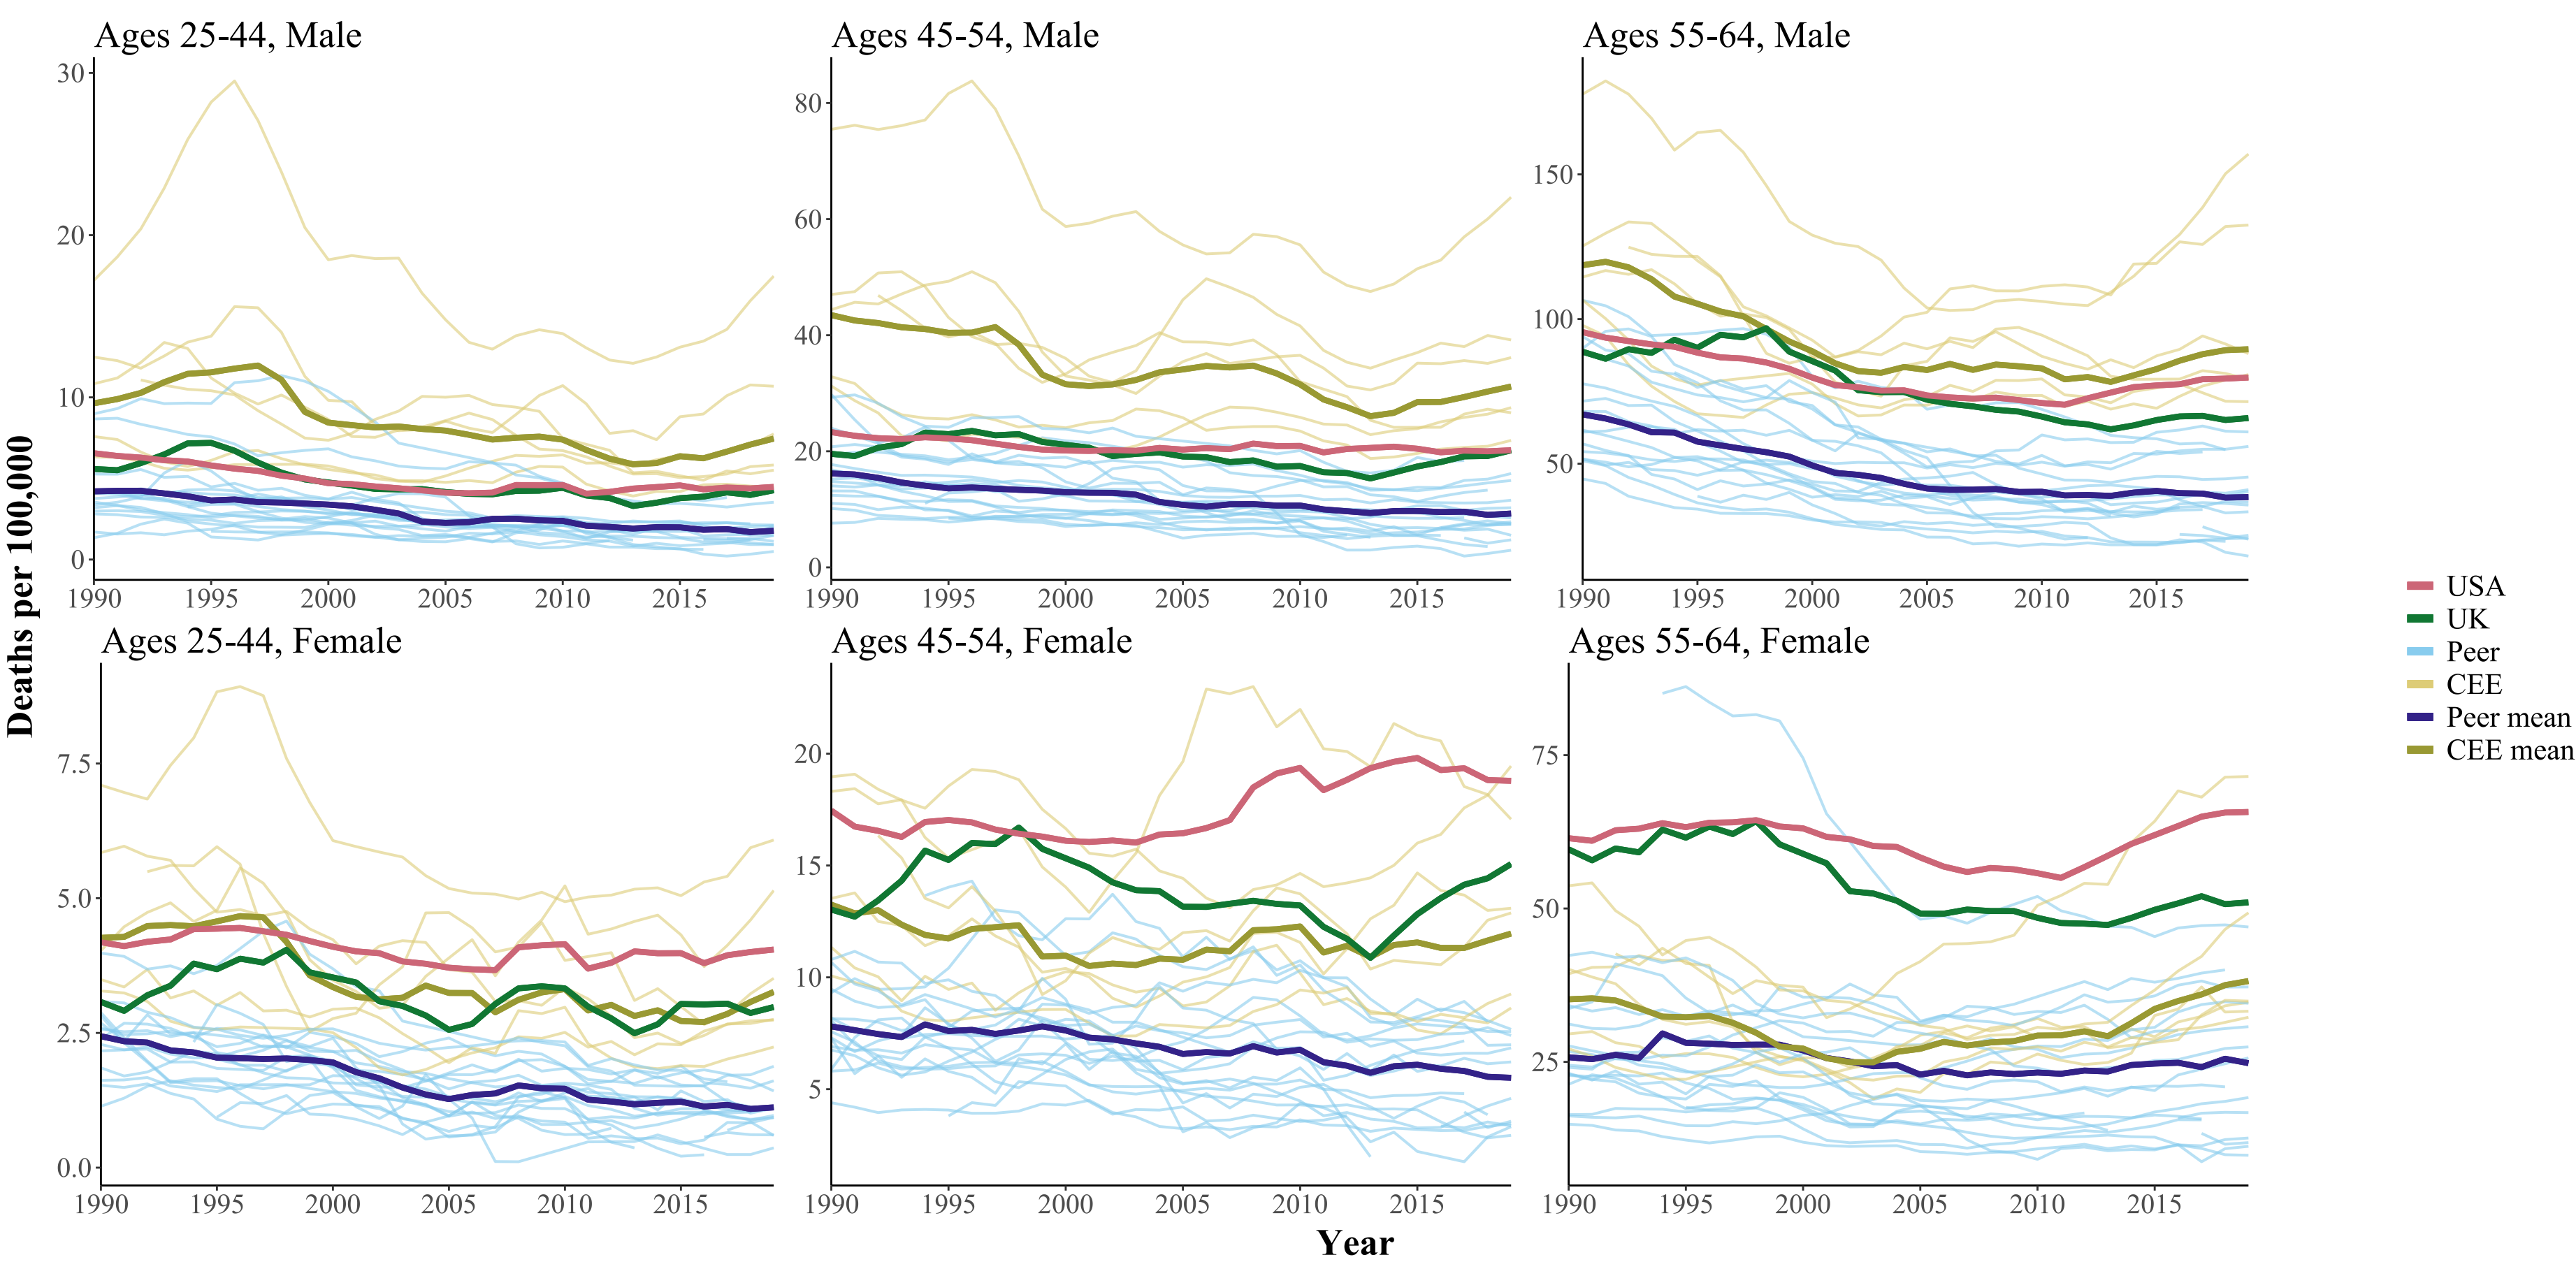

**Figure S4. Age-Standardized Mortality from Trachea/Bronchus, Lung Cancers, Years 1990-2019**

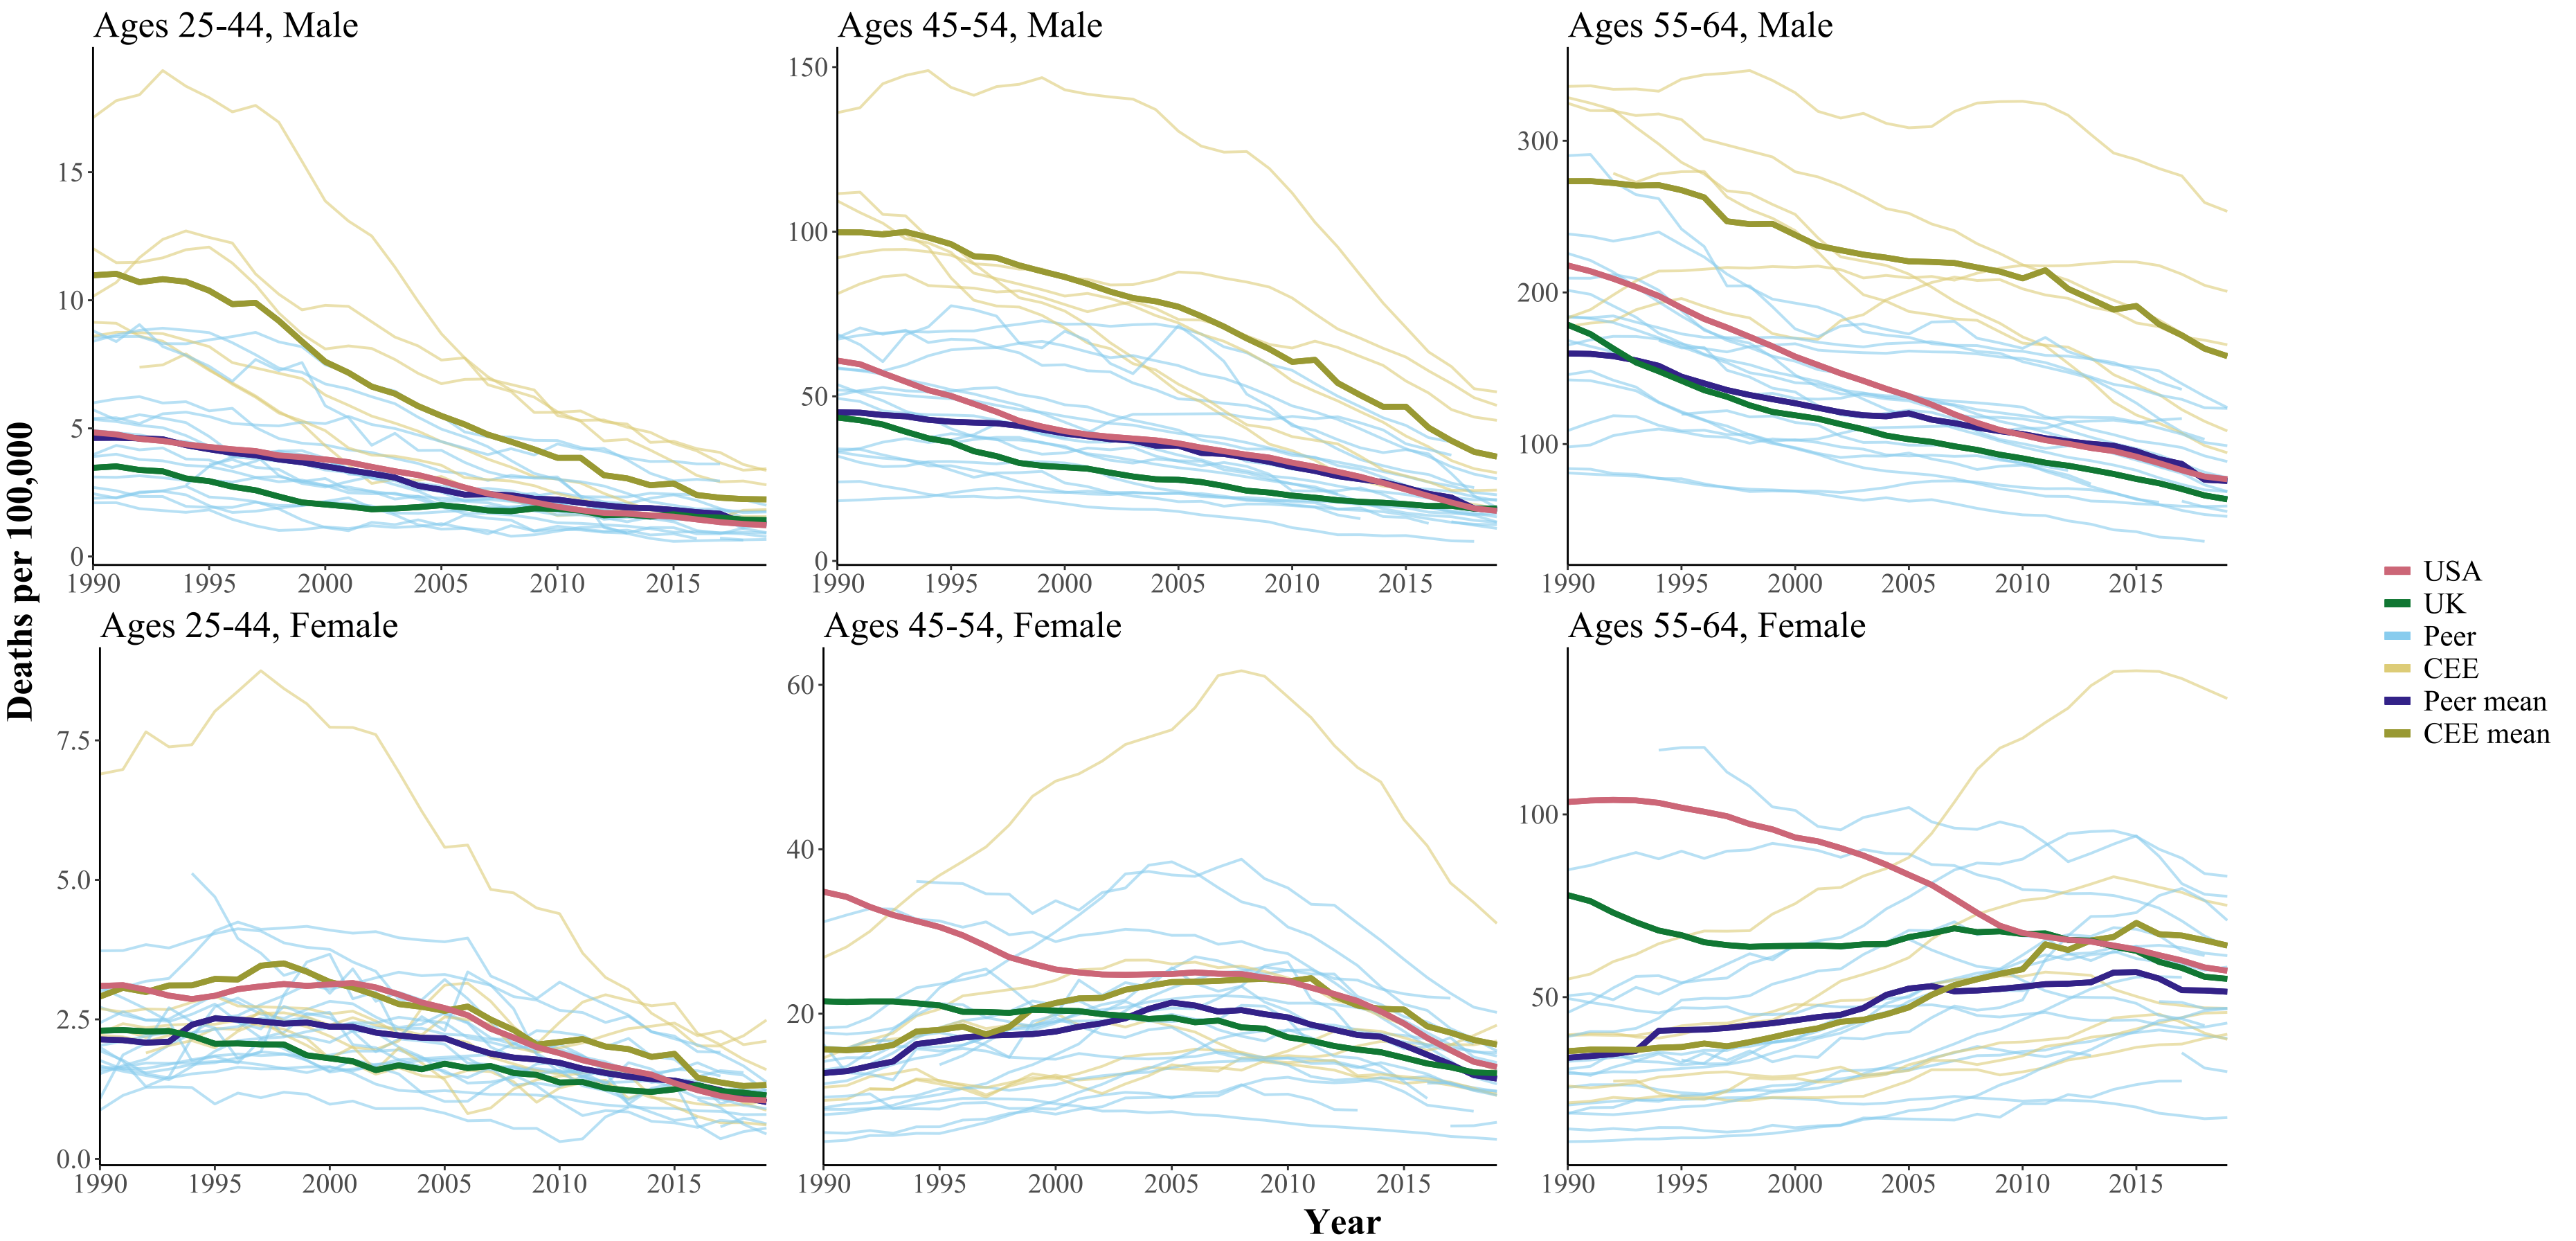

**Figure S5. Age-Standardized Mortality from All Other Cancers, Years 1990-2019**

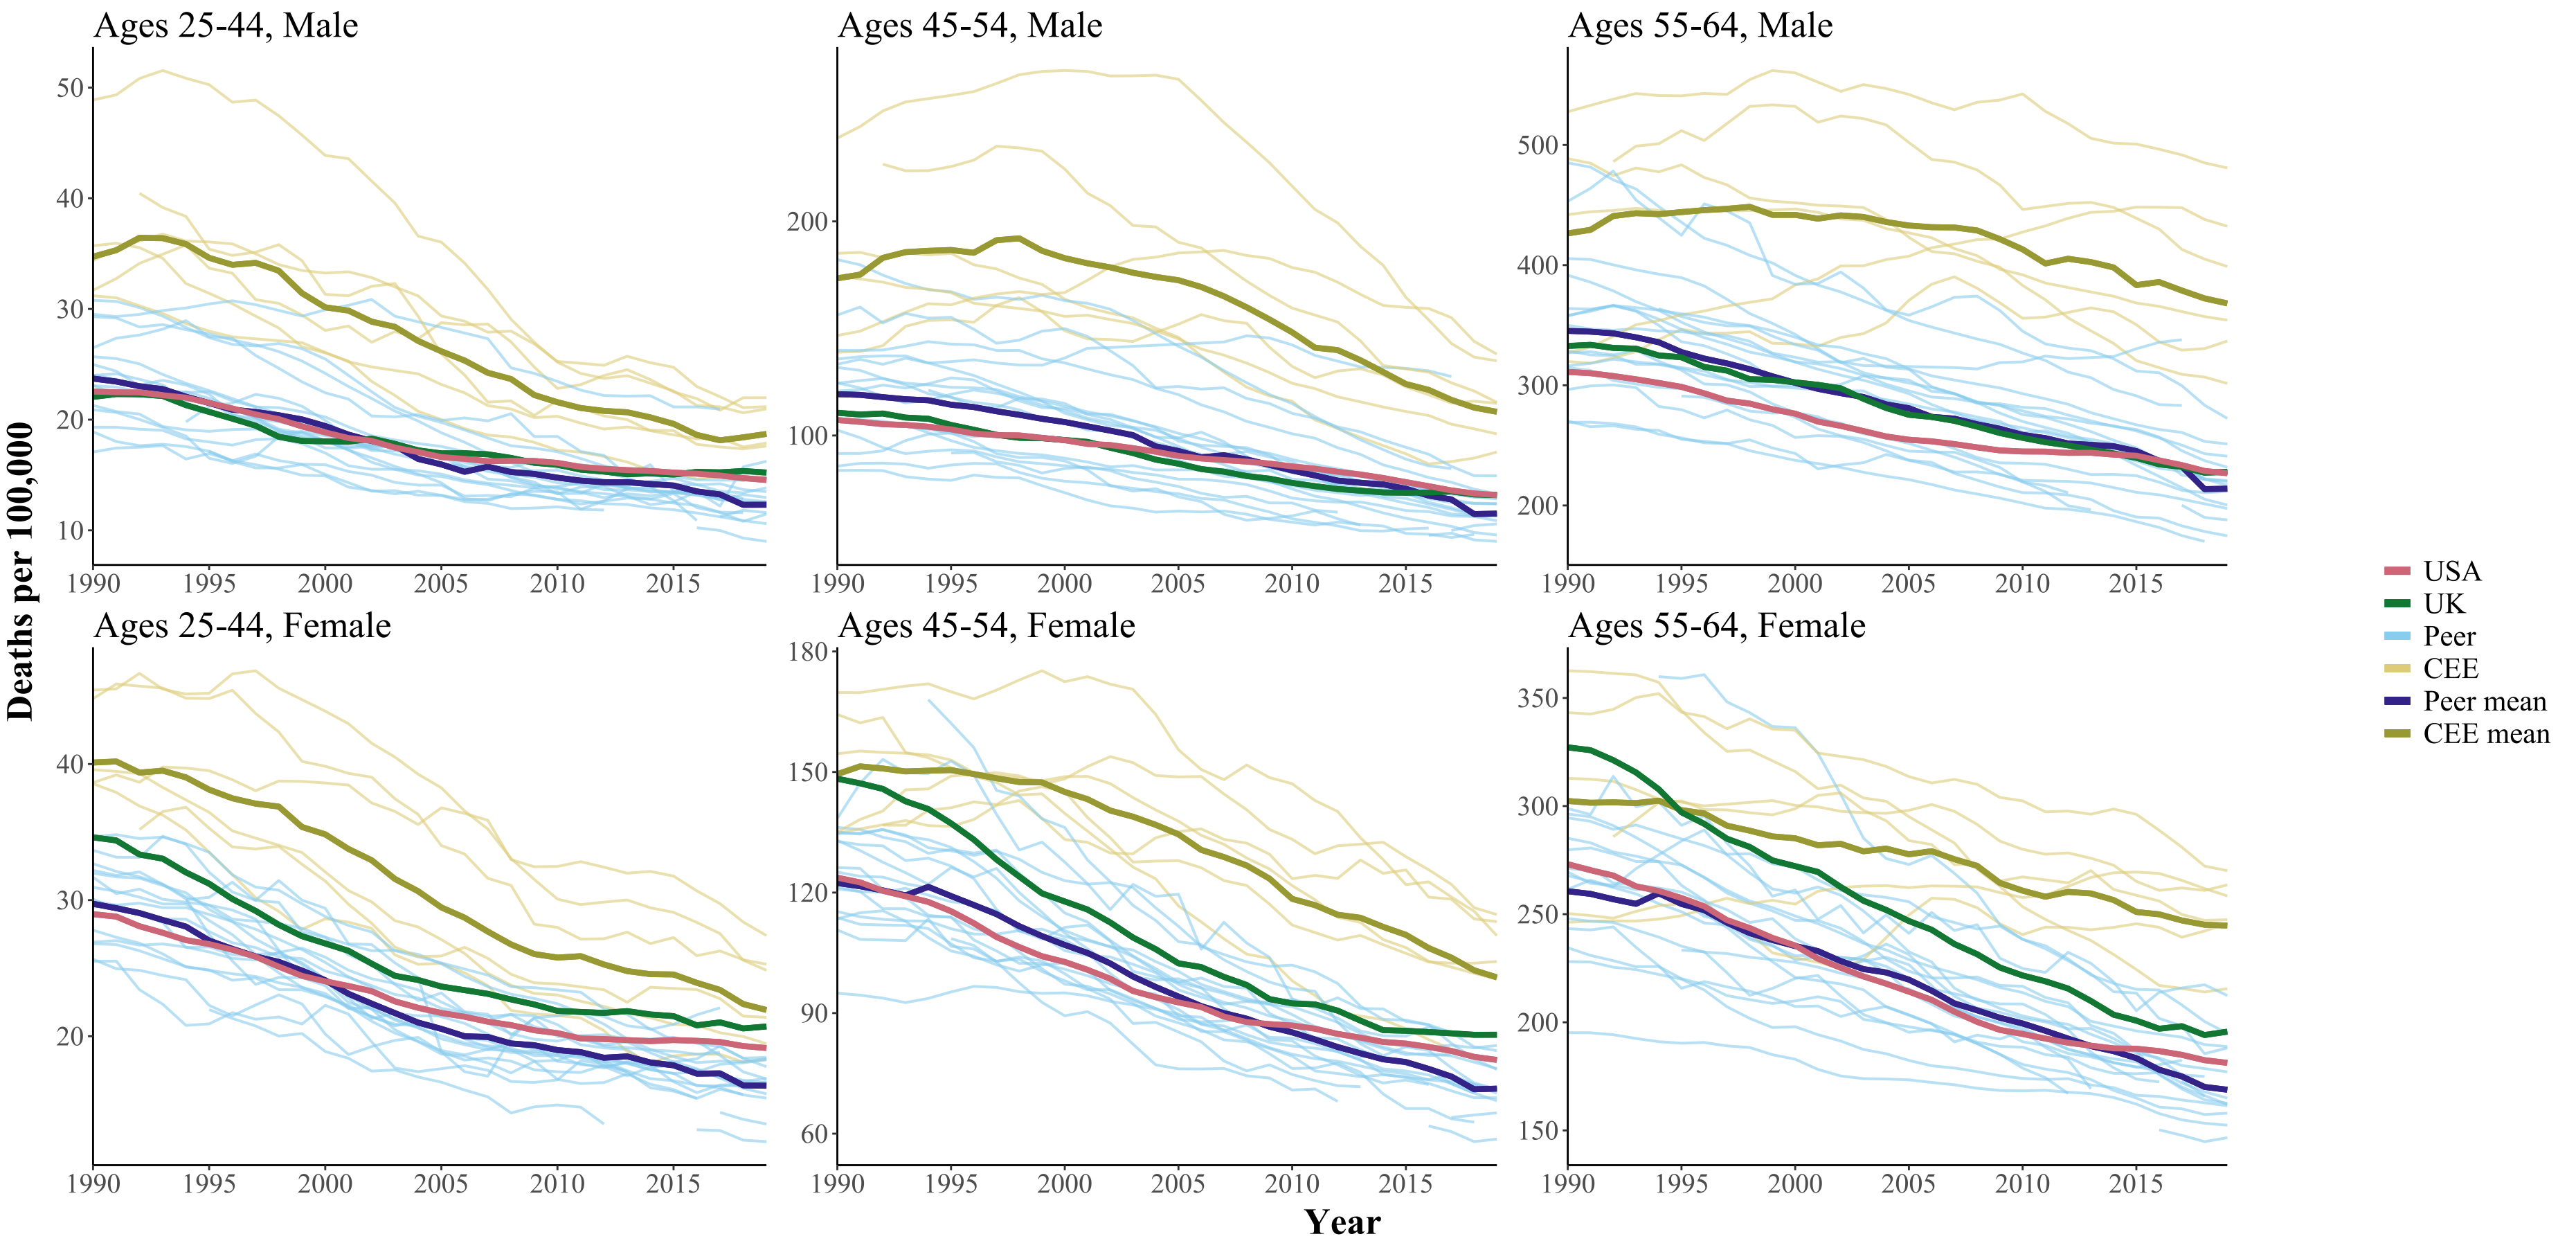

**Figure S6. Age-Standardized Mortality from Nervous System Diseases, Years 1990-2019**

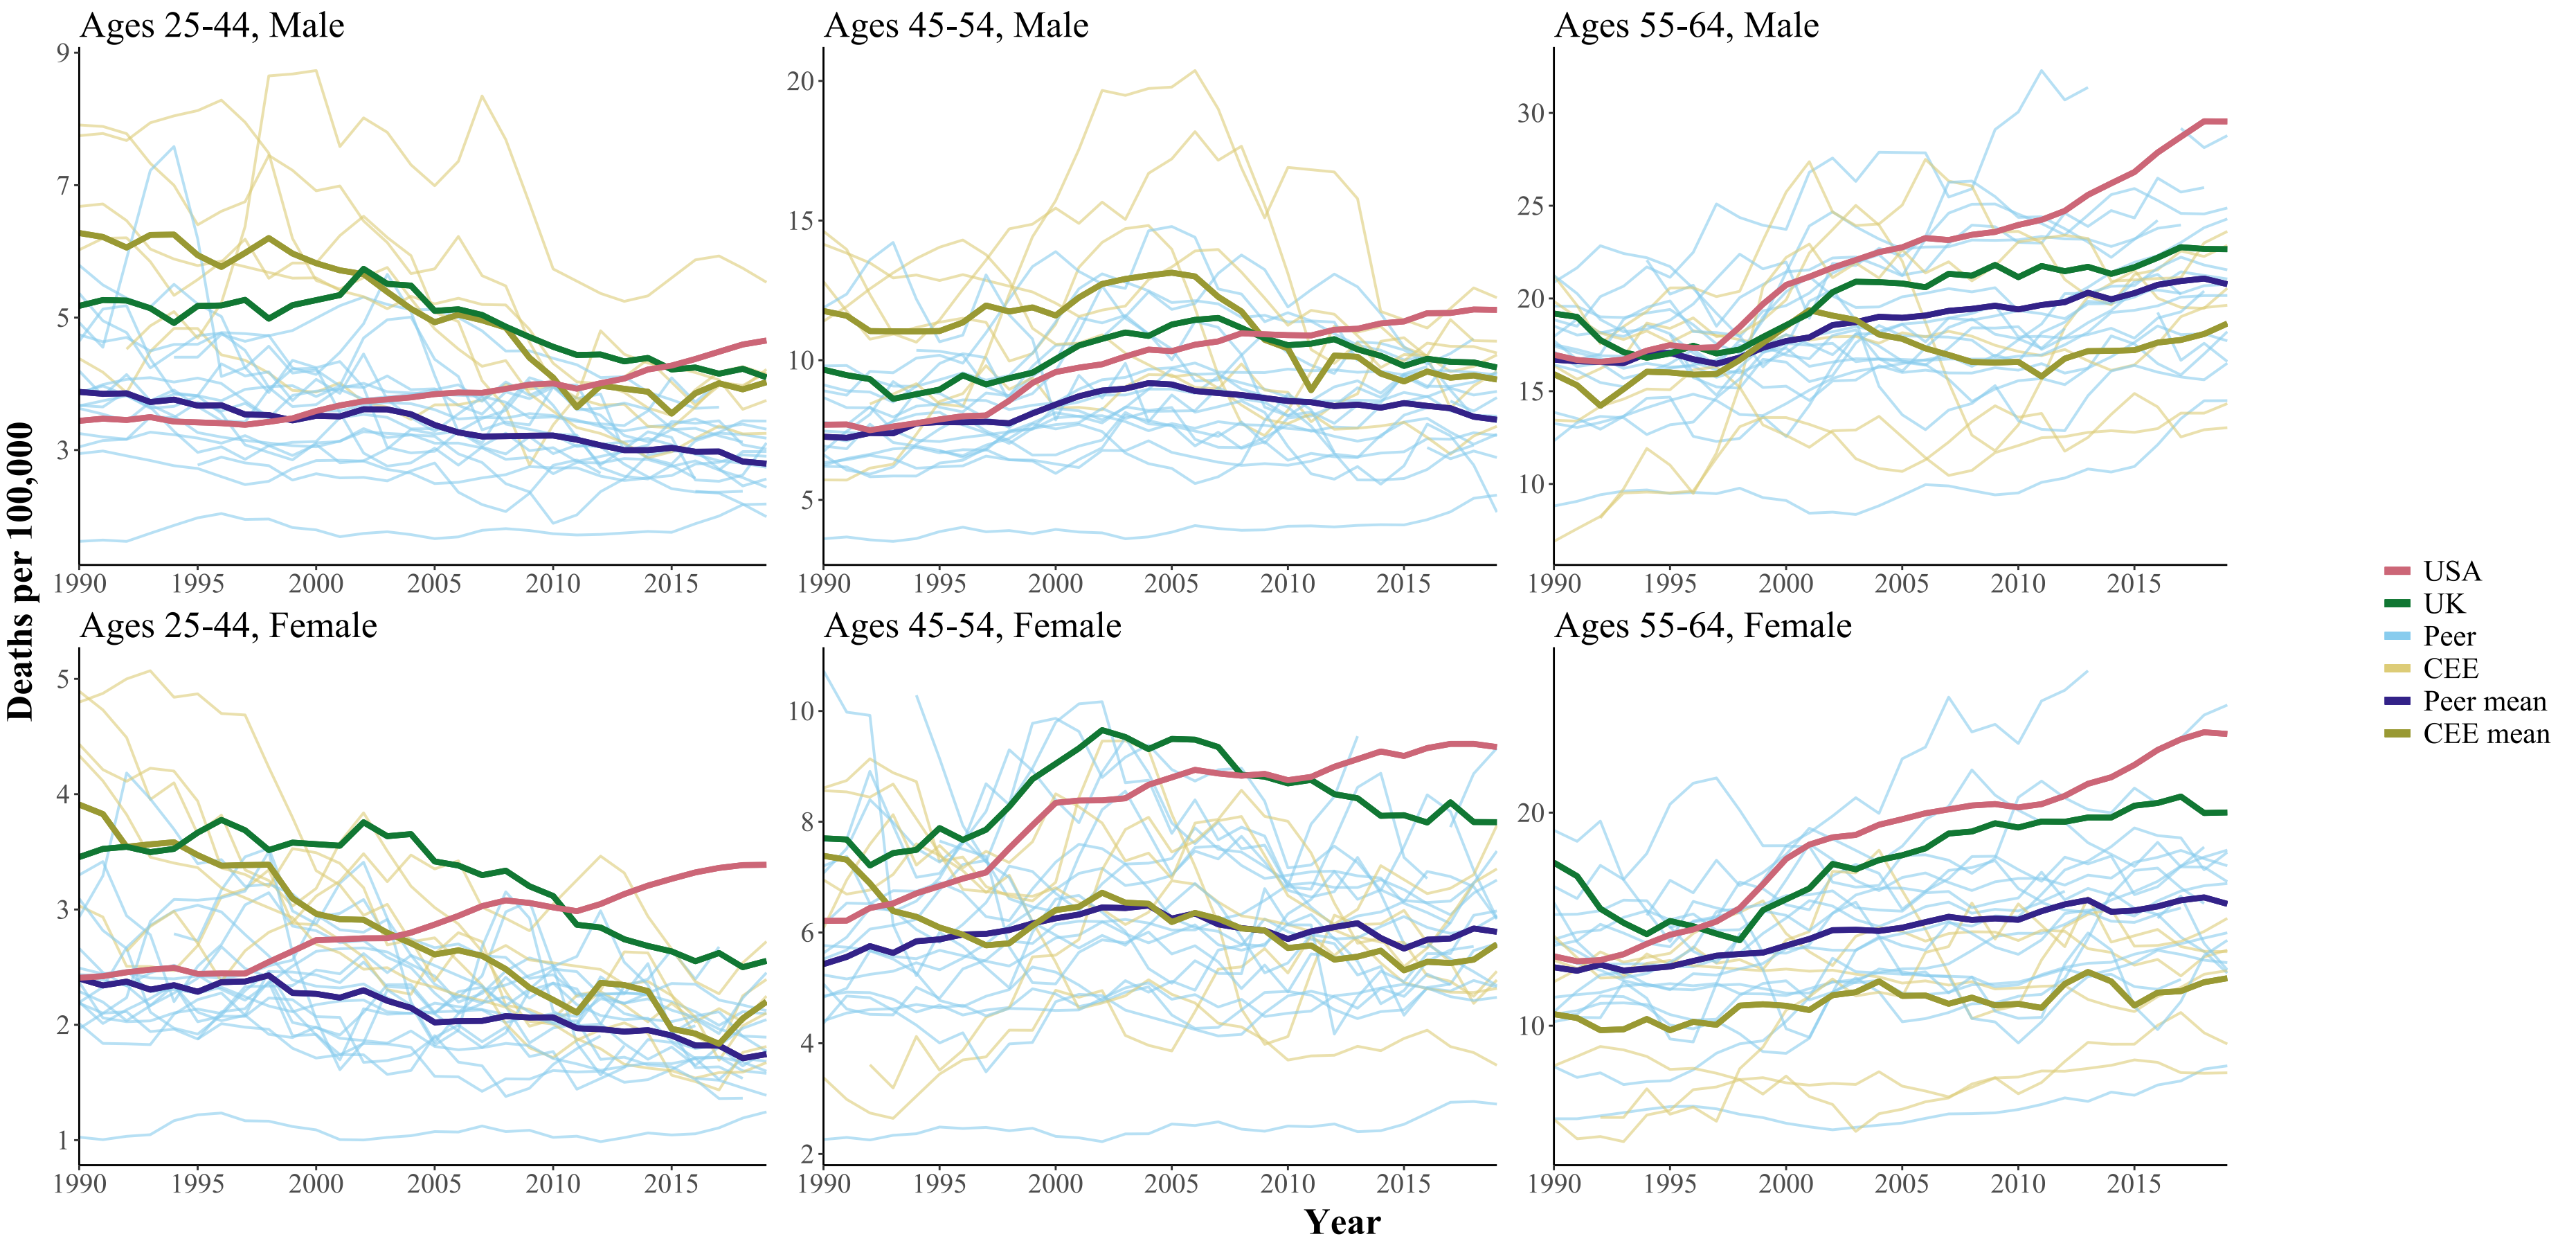

**Figure S7. Age-Standardized Mortality from Metabolic Diseases, Years 1990-2019**

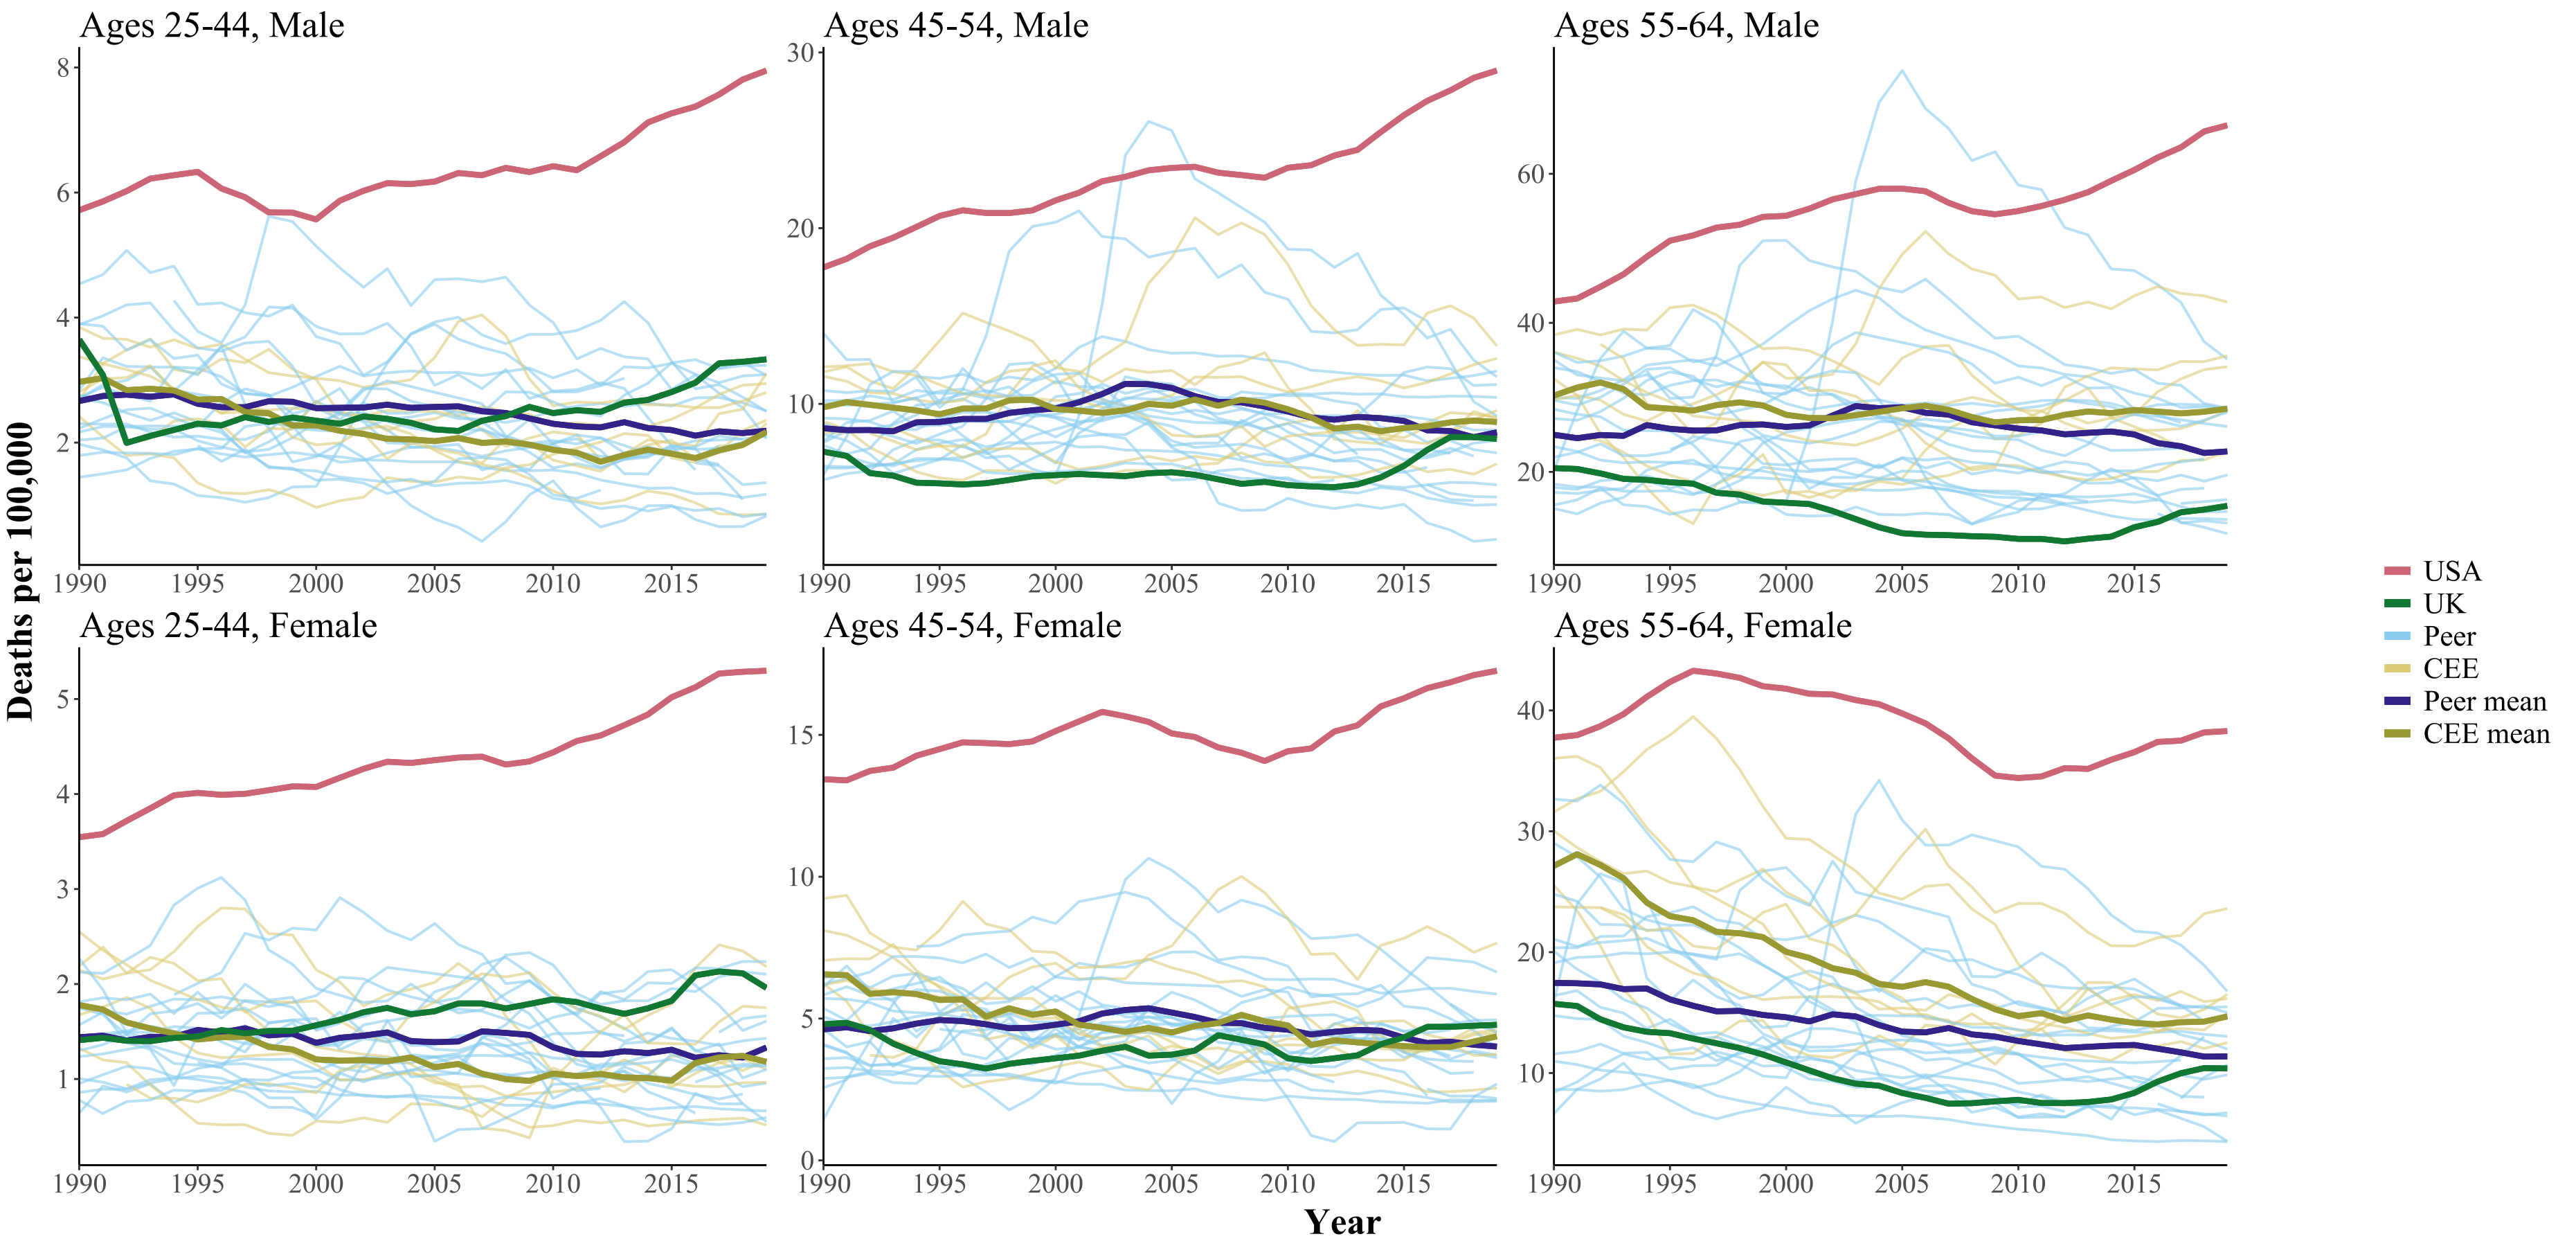

**Figure S8. Age-Standardized Mortality from Cardiovascular Disease, Years 1990-2019**

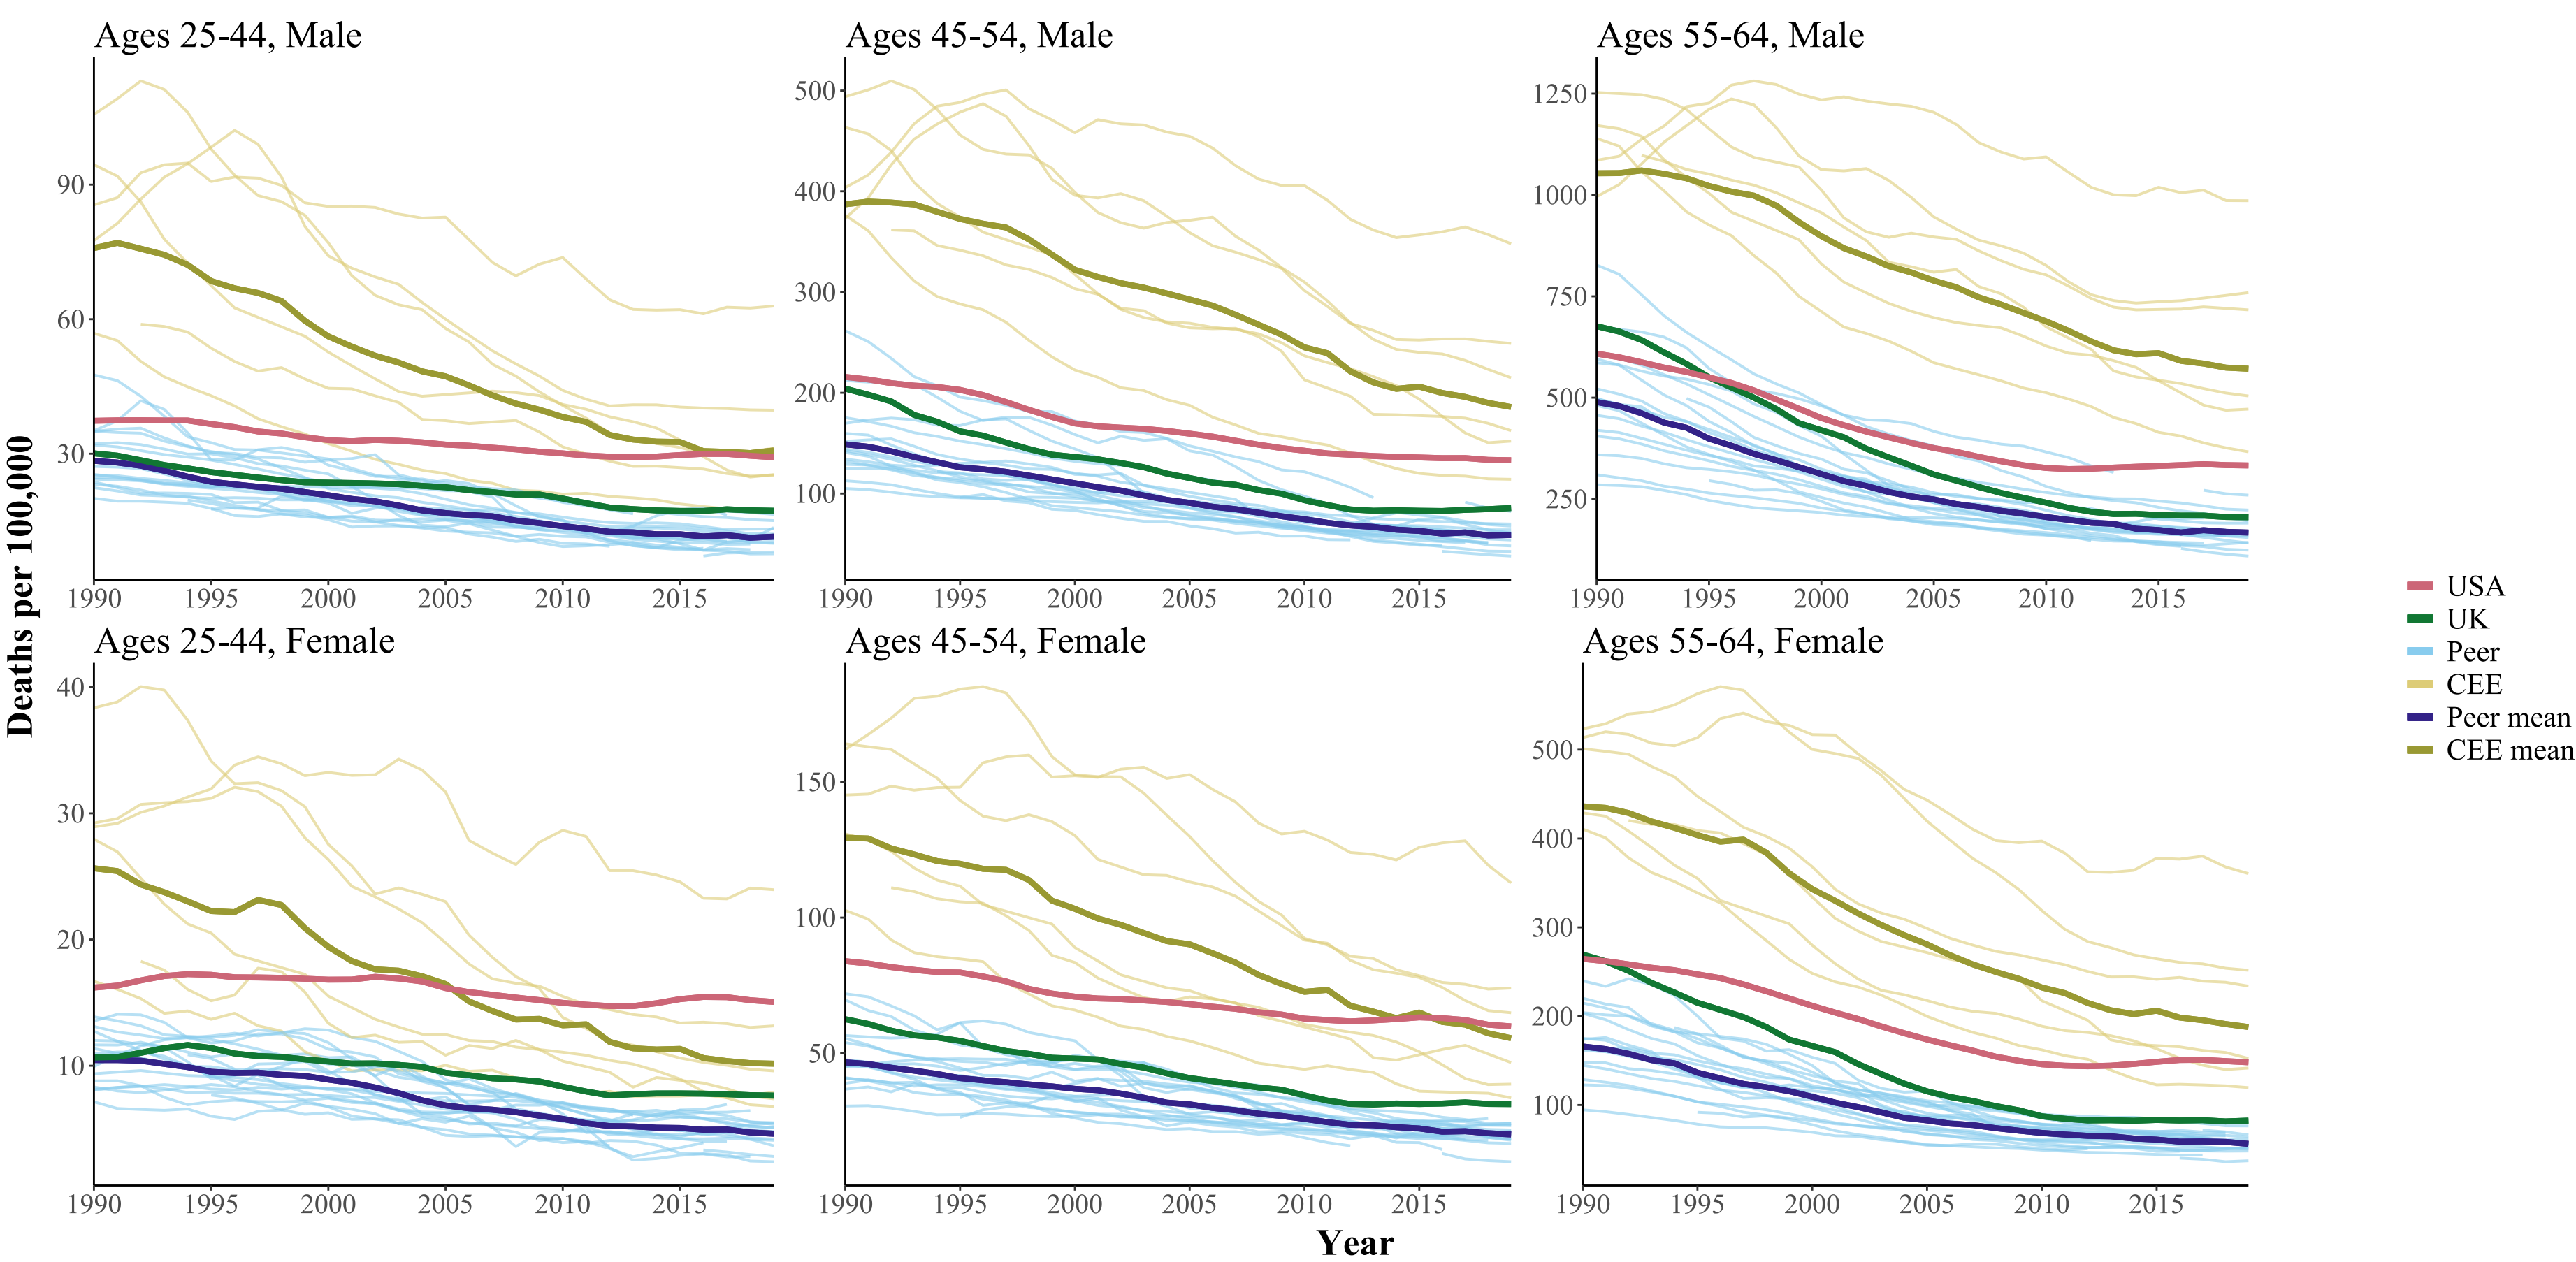

**Figure S9. Age-Standardized Mortality from Suicide, Years 1990-2019**

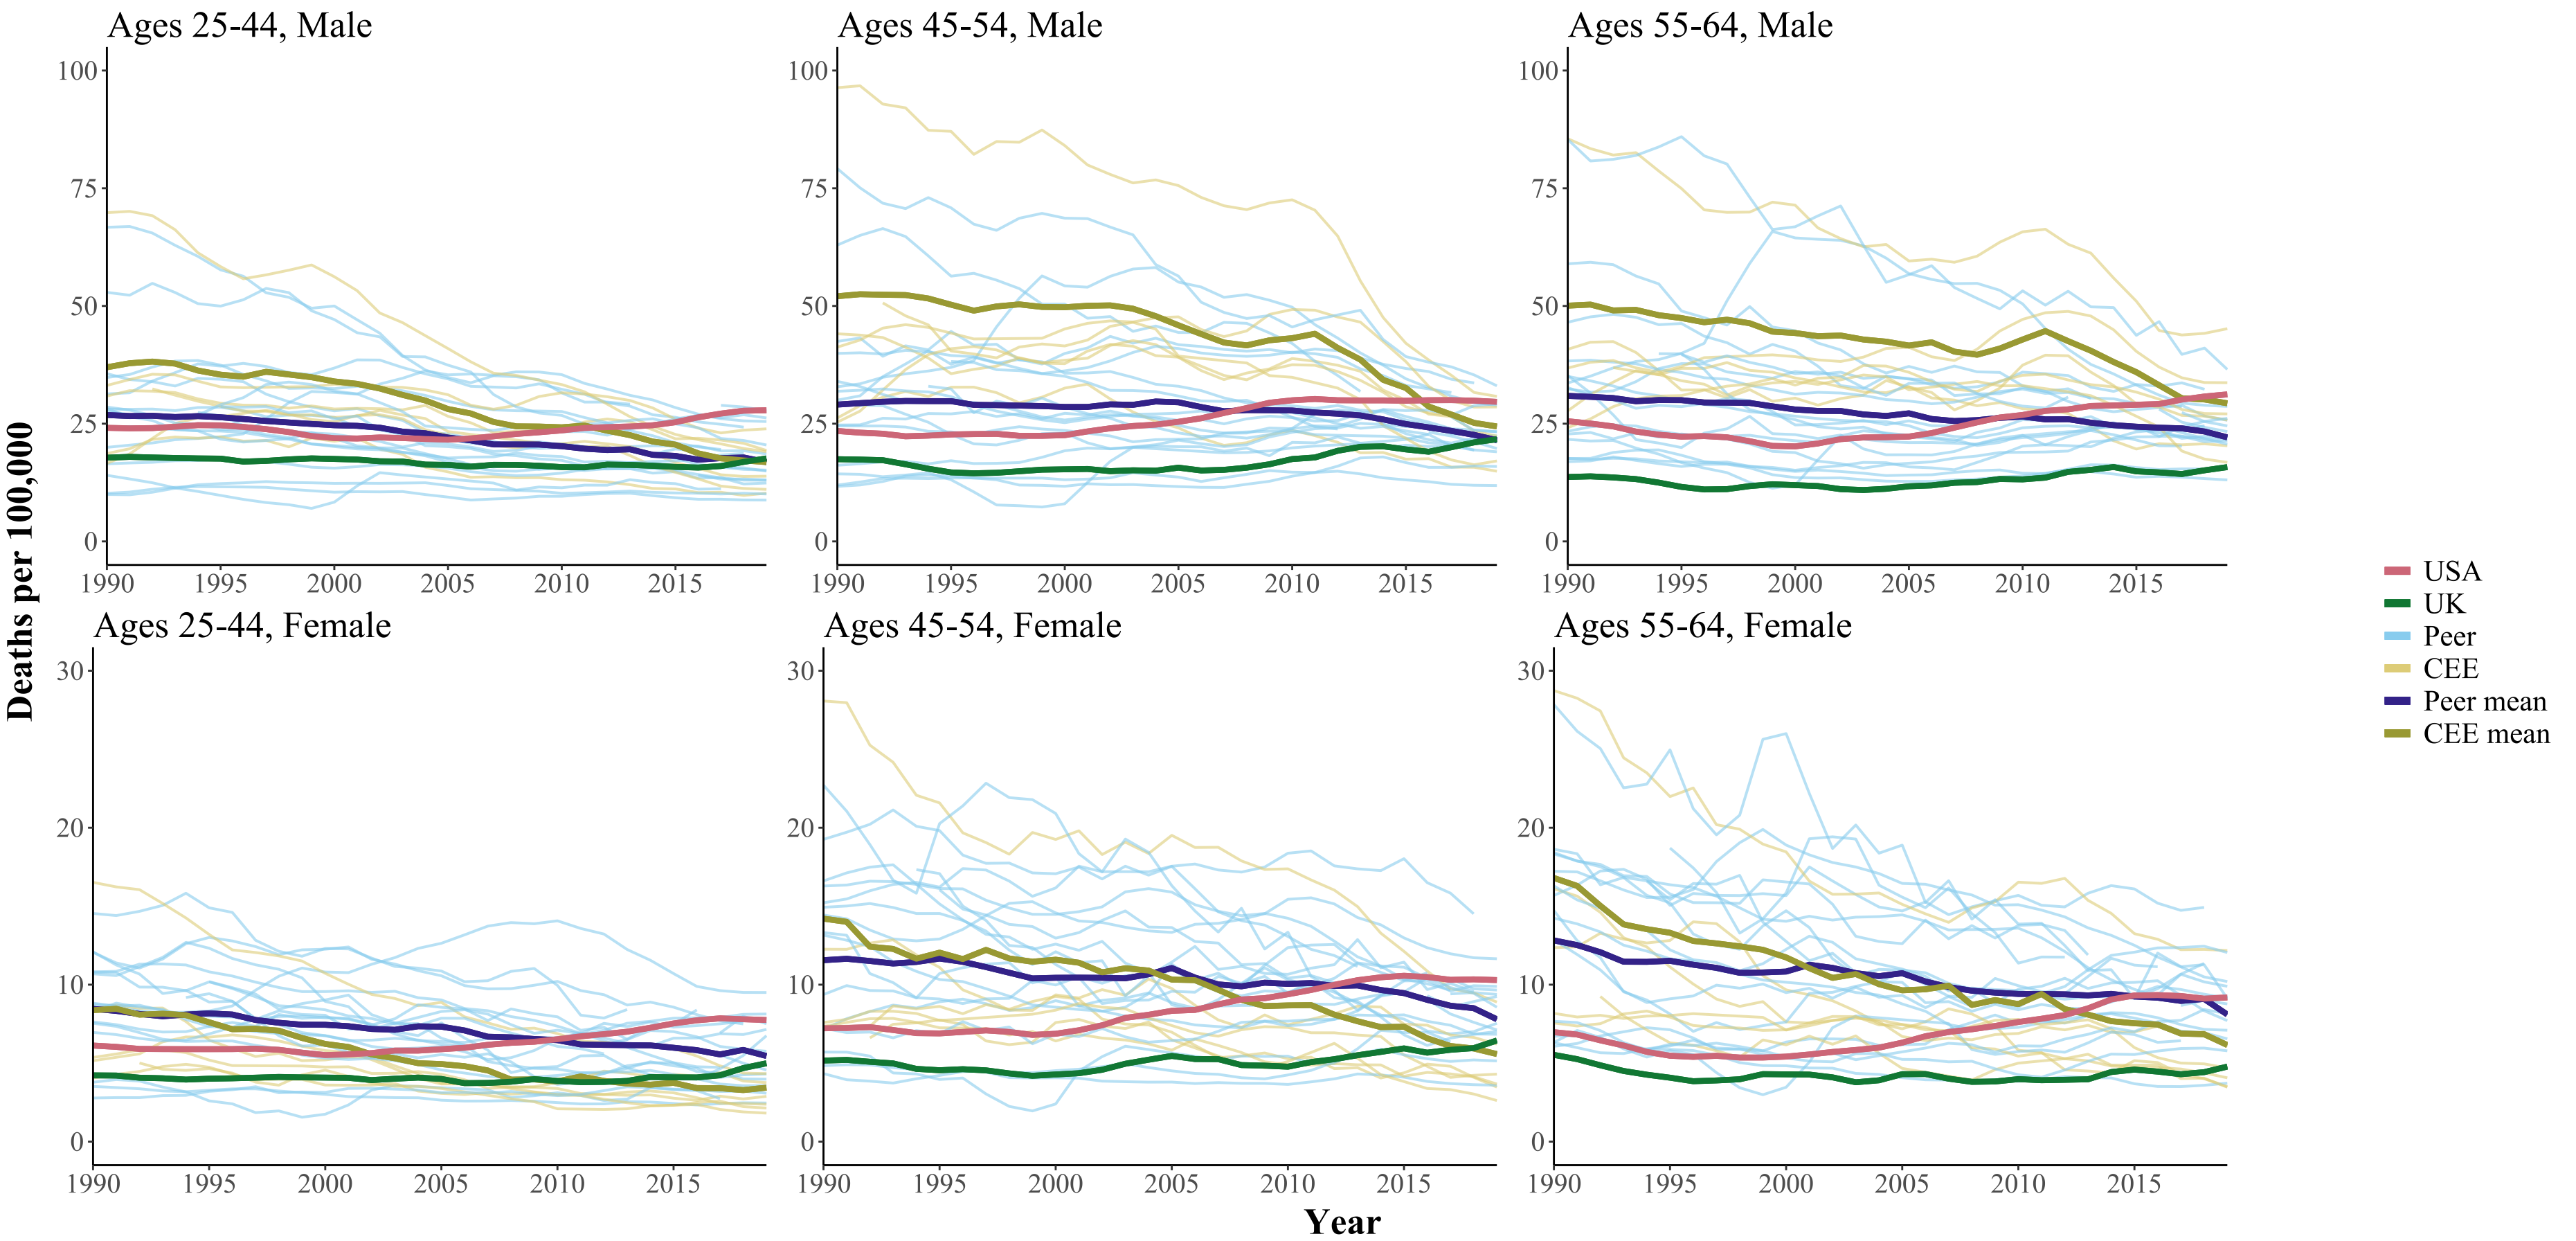

**Figure S10. Age-Standardized Mortality from Homicide, Years 1990-2019**

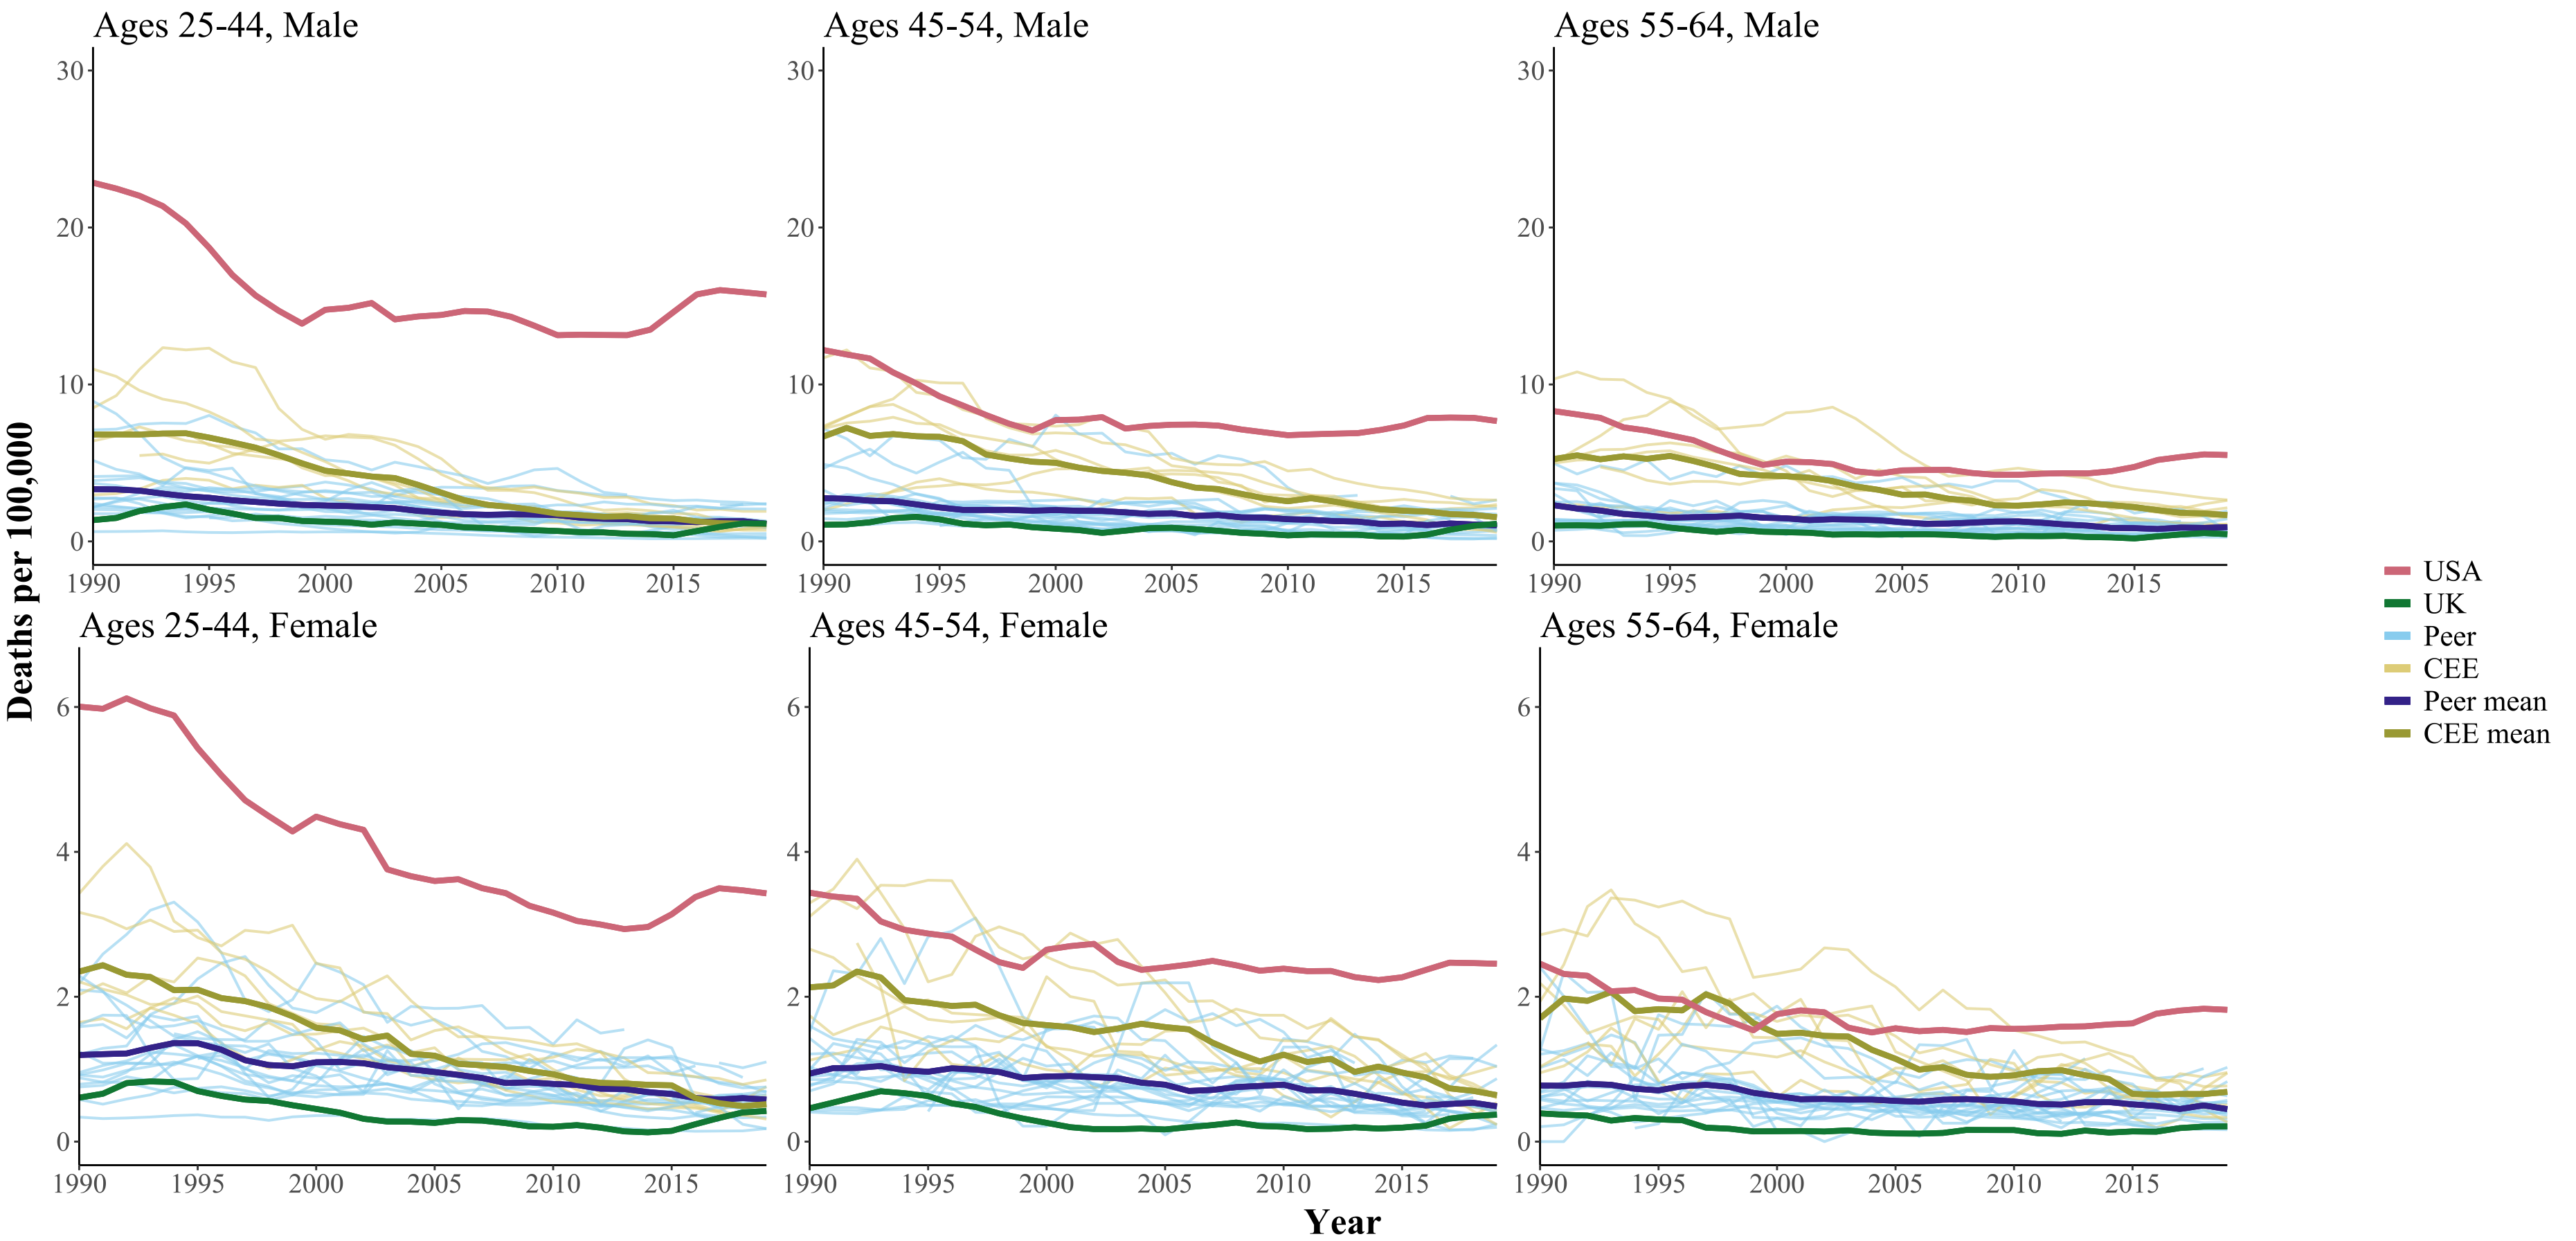

**Figure S11. Age-Standardized Mortality from Transport Accidents, Years 1990-2019**

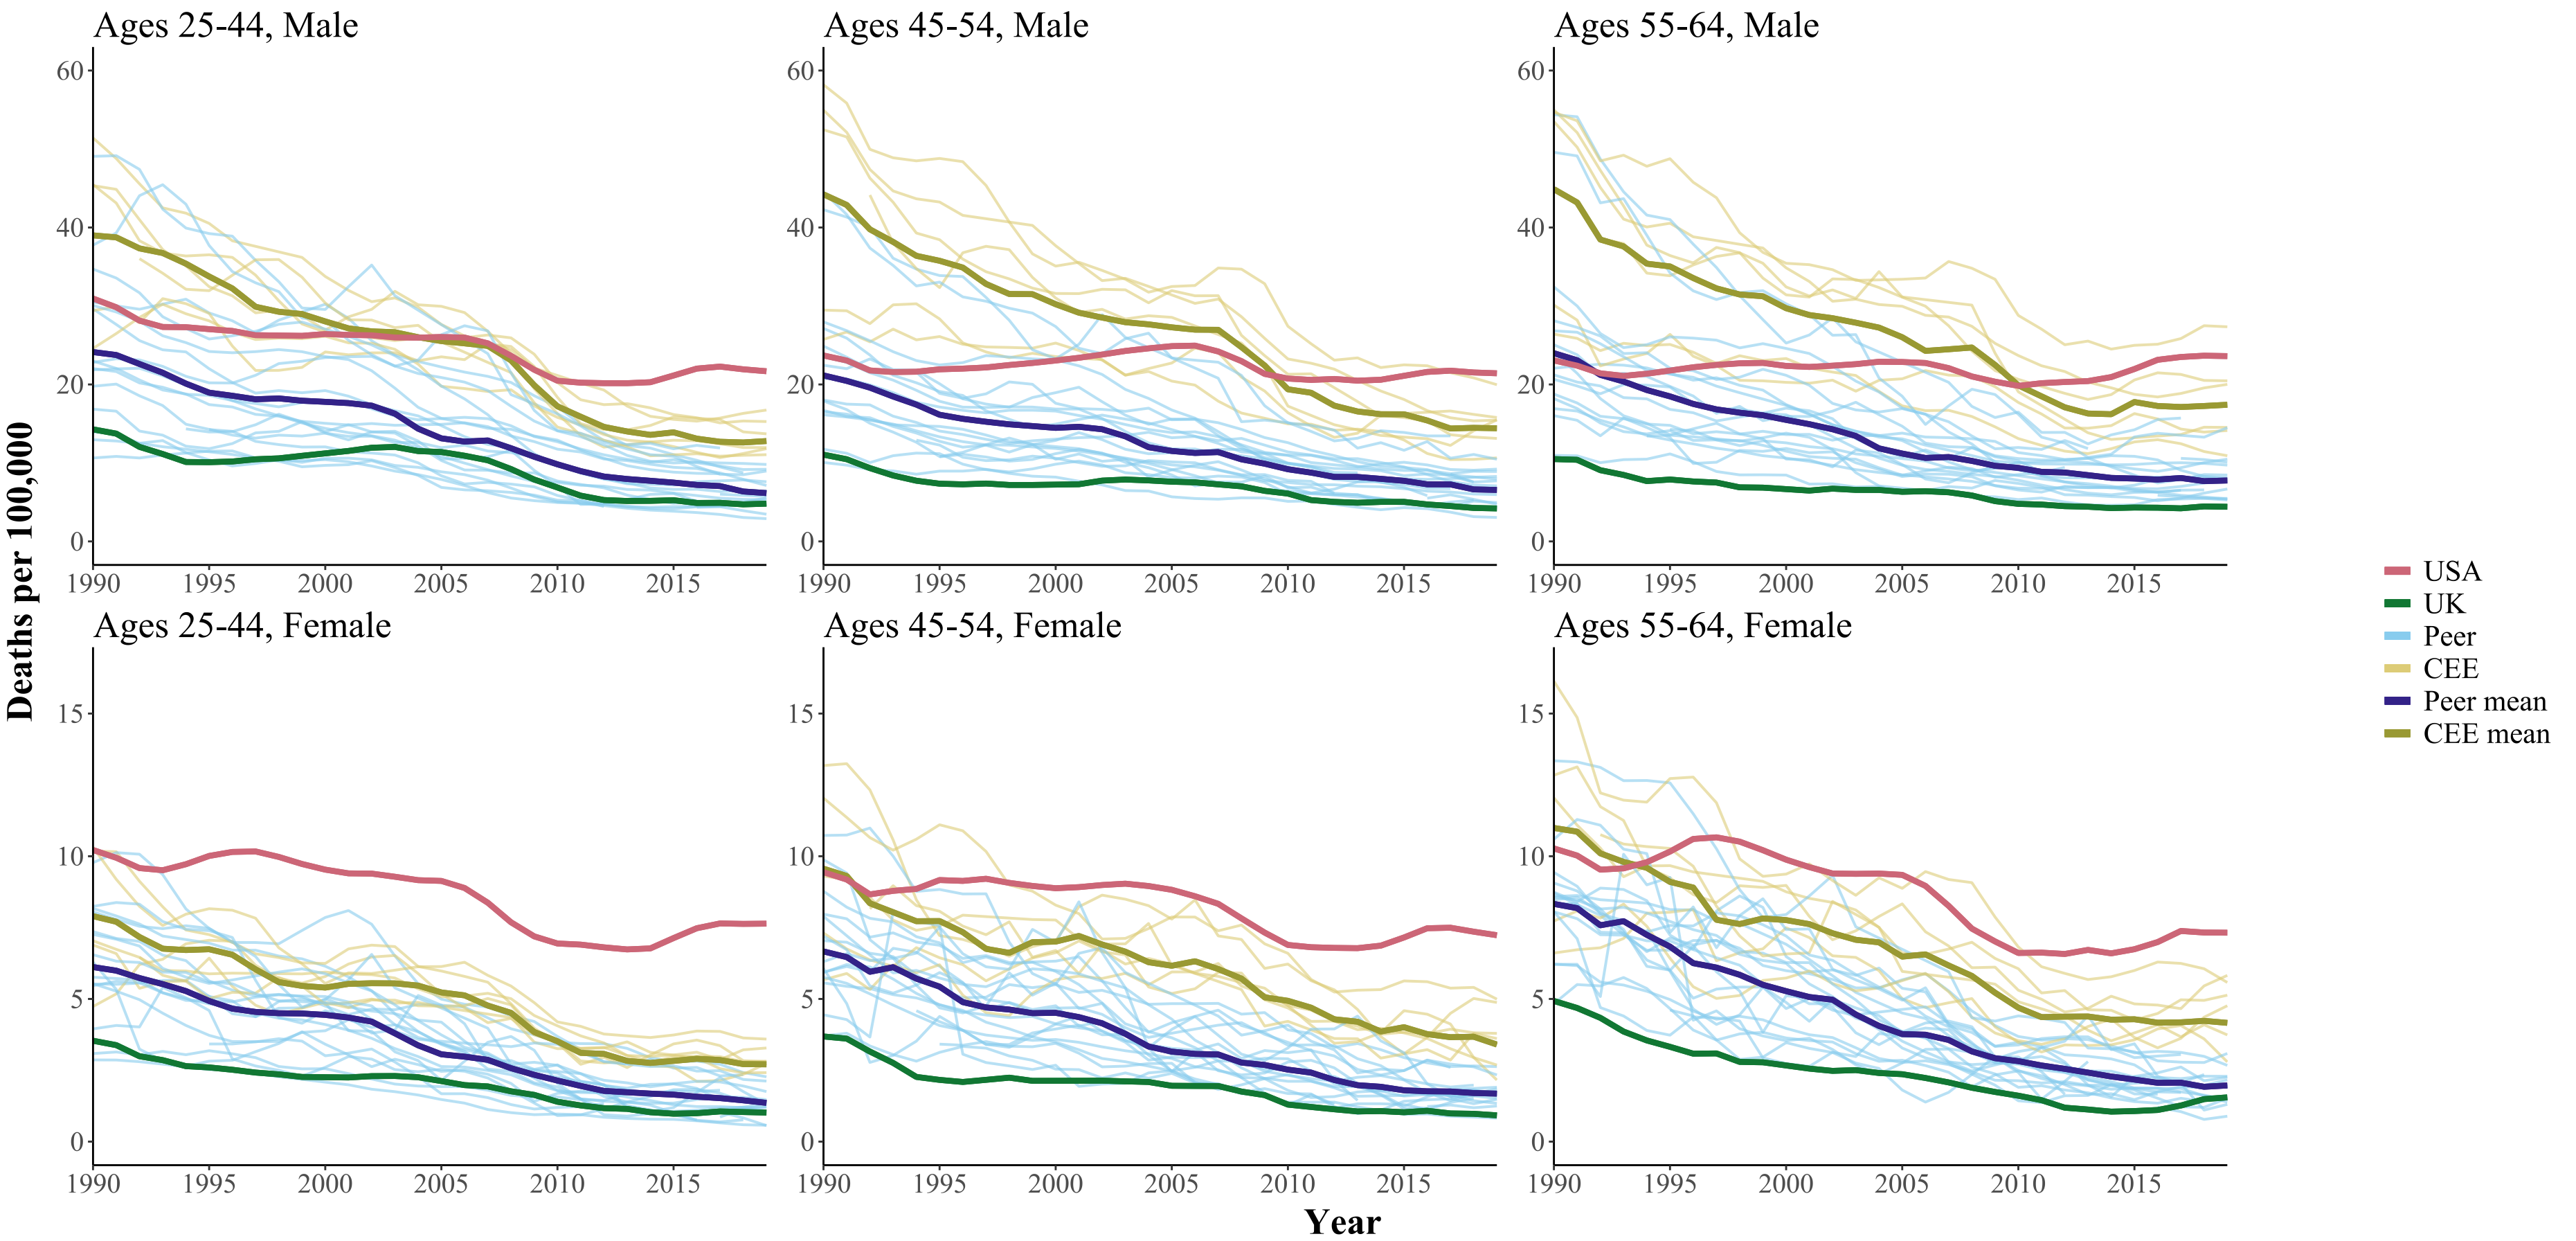

**Figure S12. Age-Standardized Mortality from Other External Causes, Years 1990-2019**

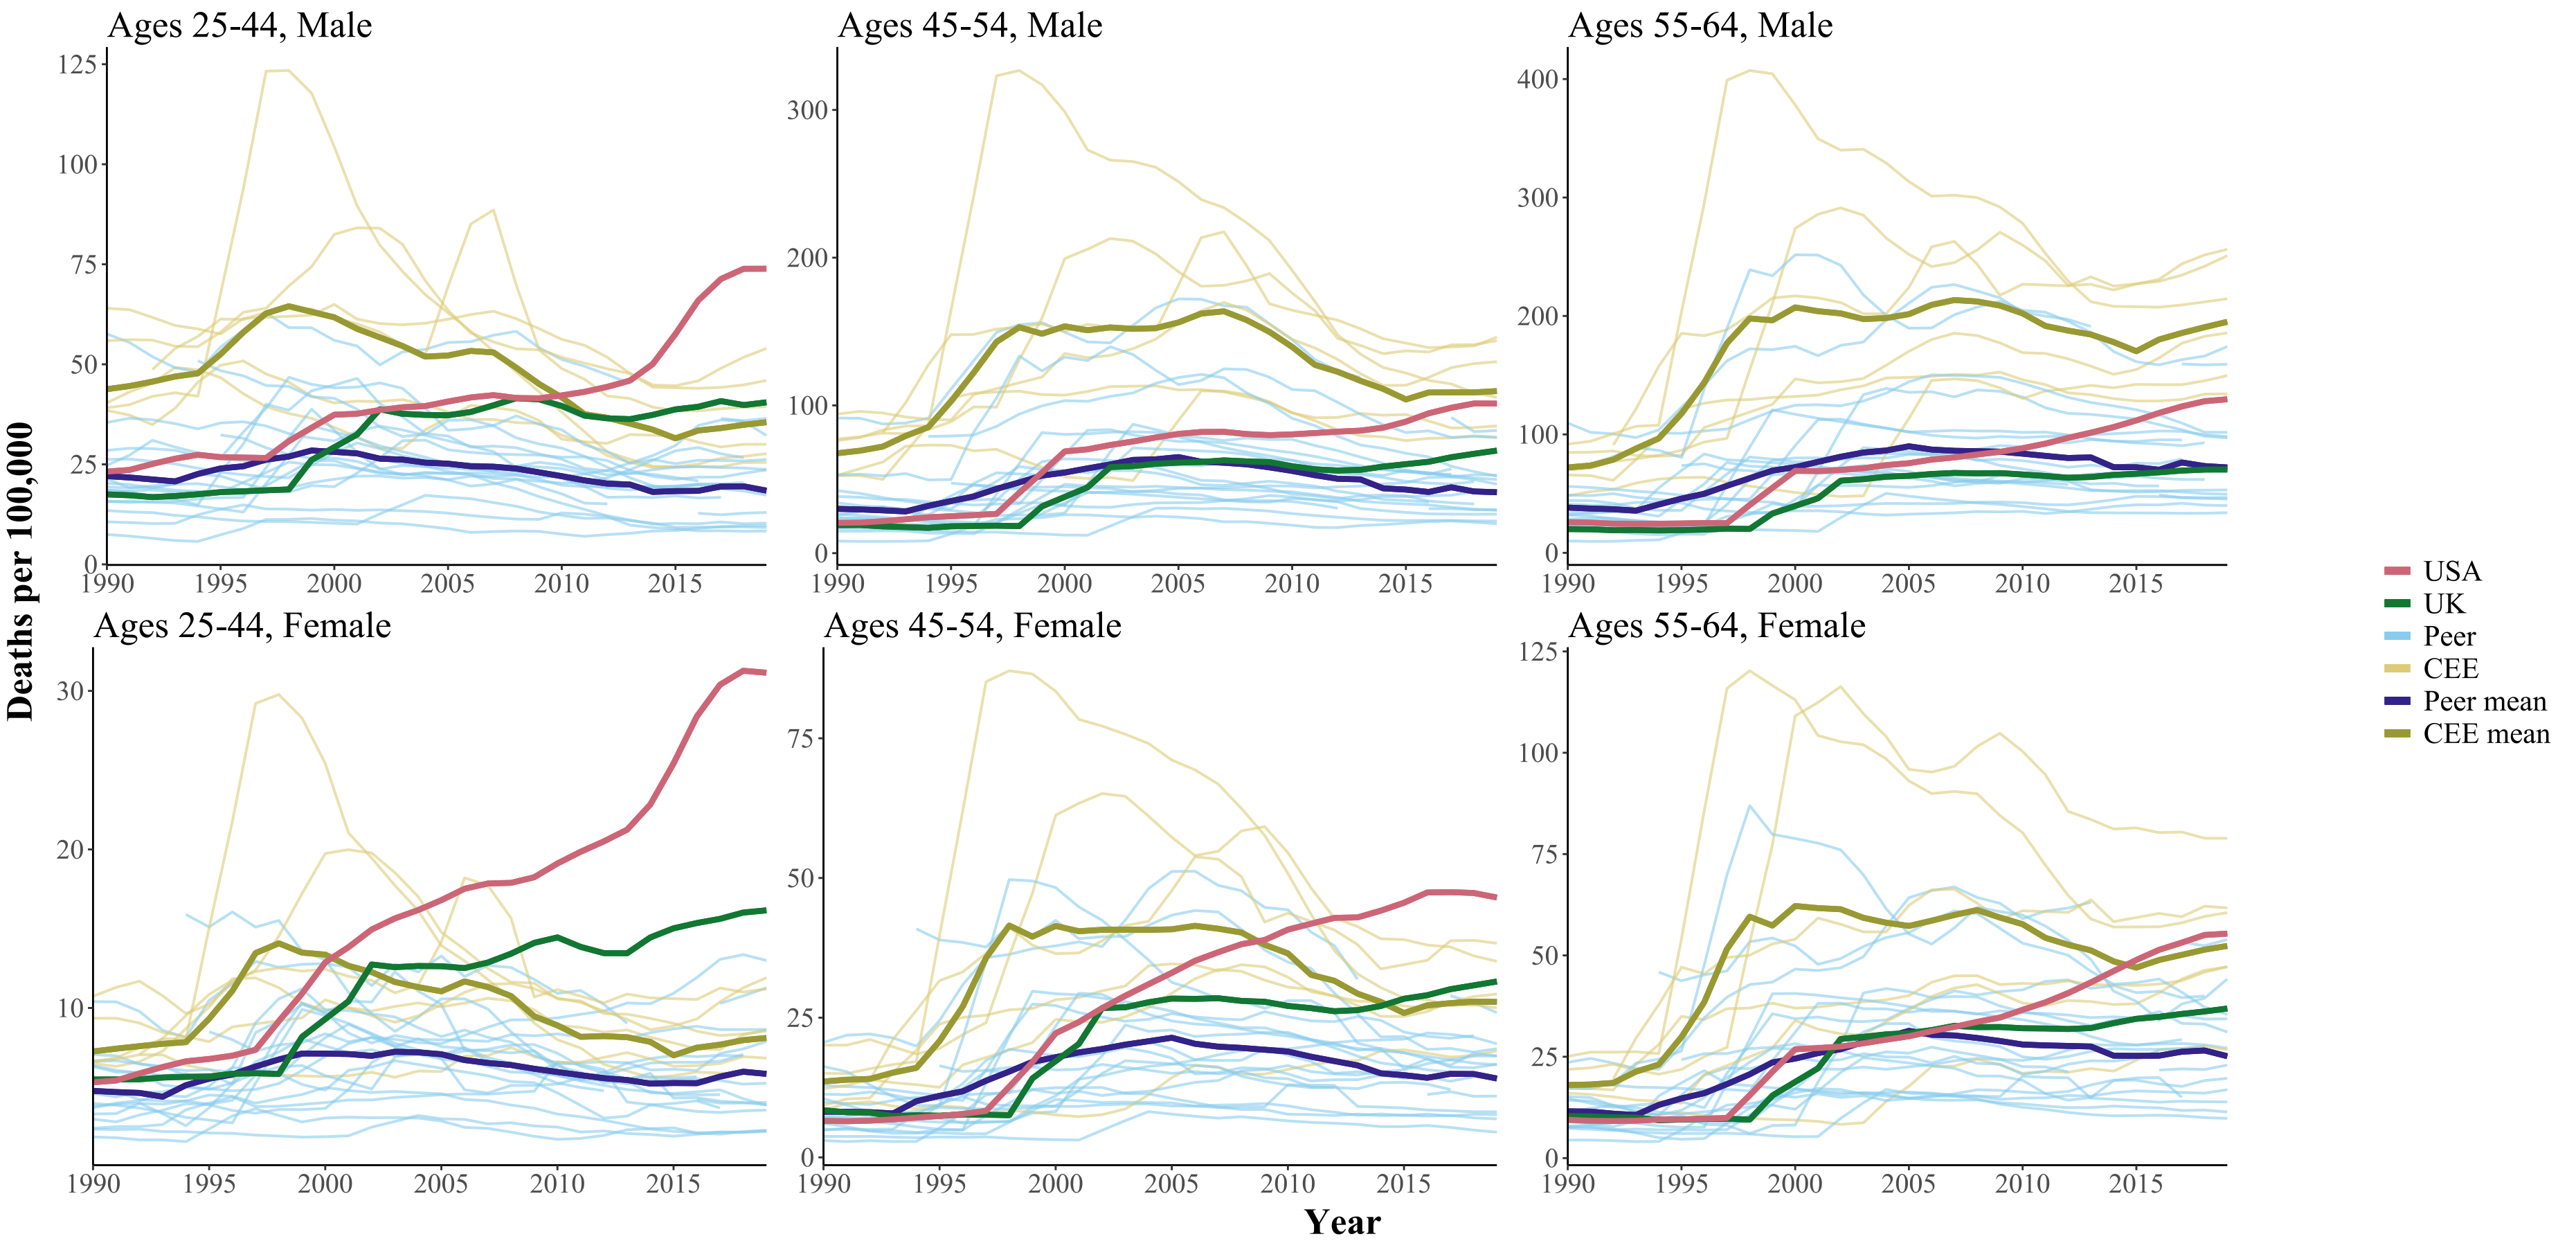

**Figure S13. Age-Standardized Mortality from All Other Causes, Years 1990-2019**

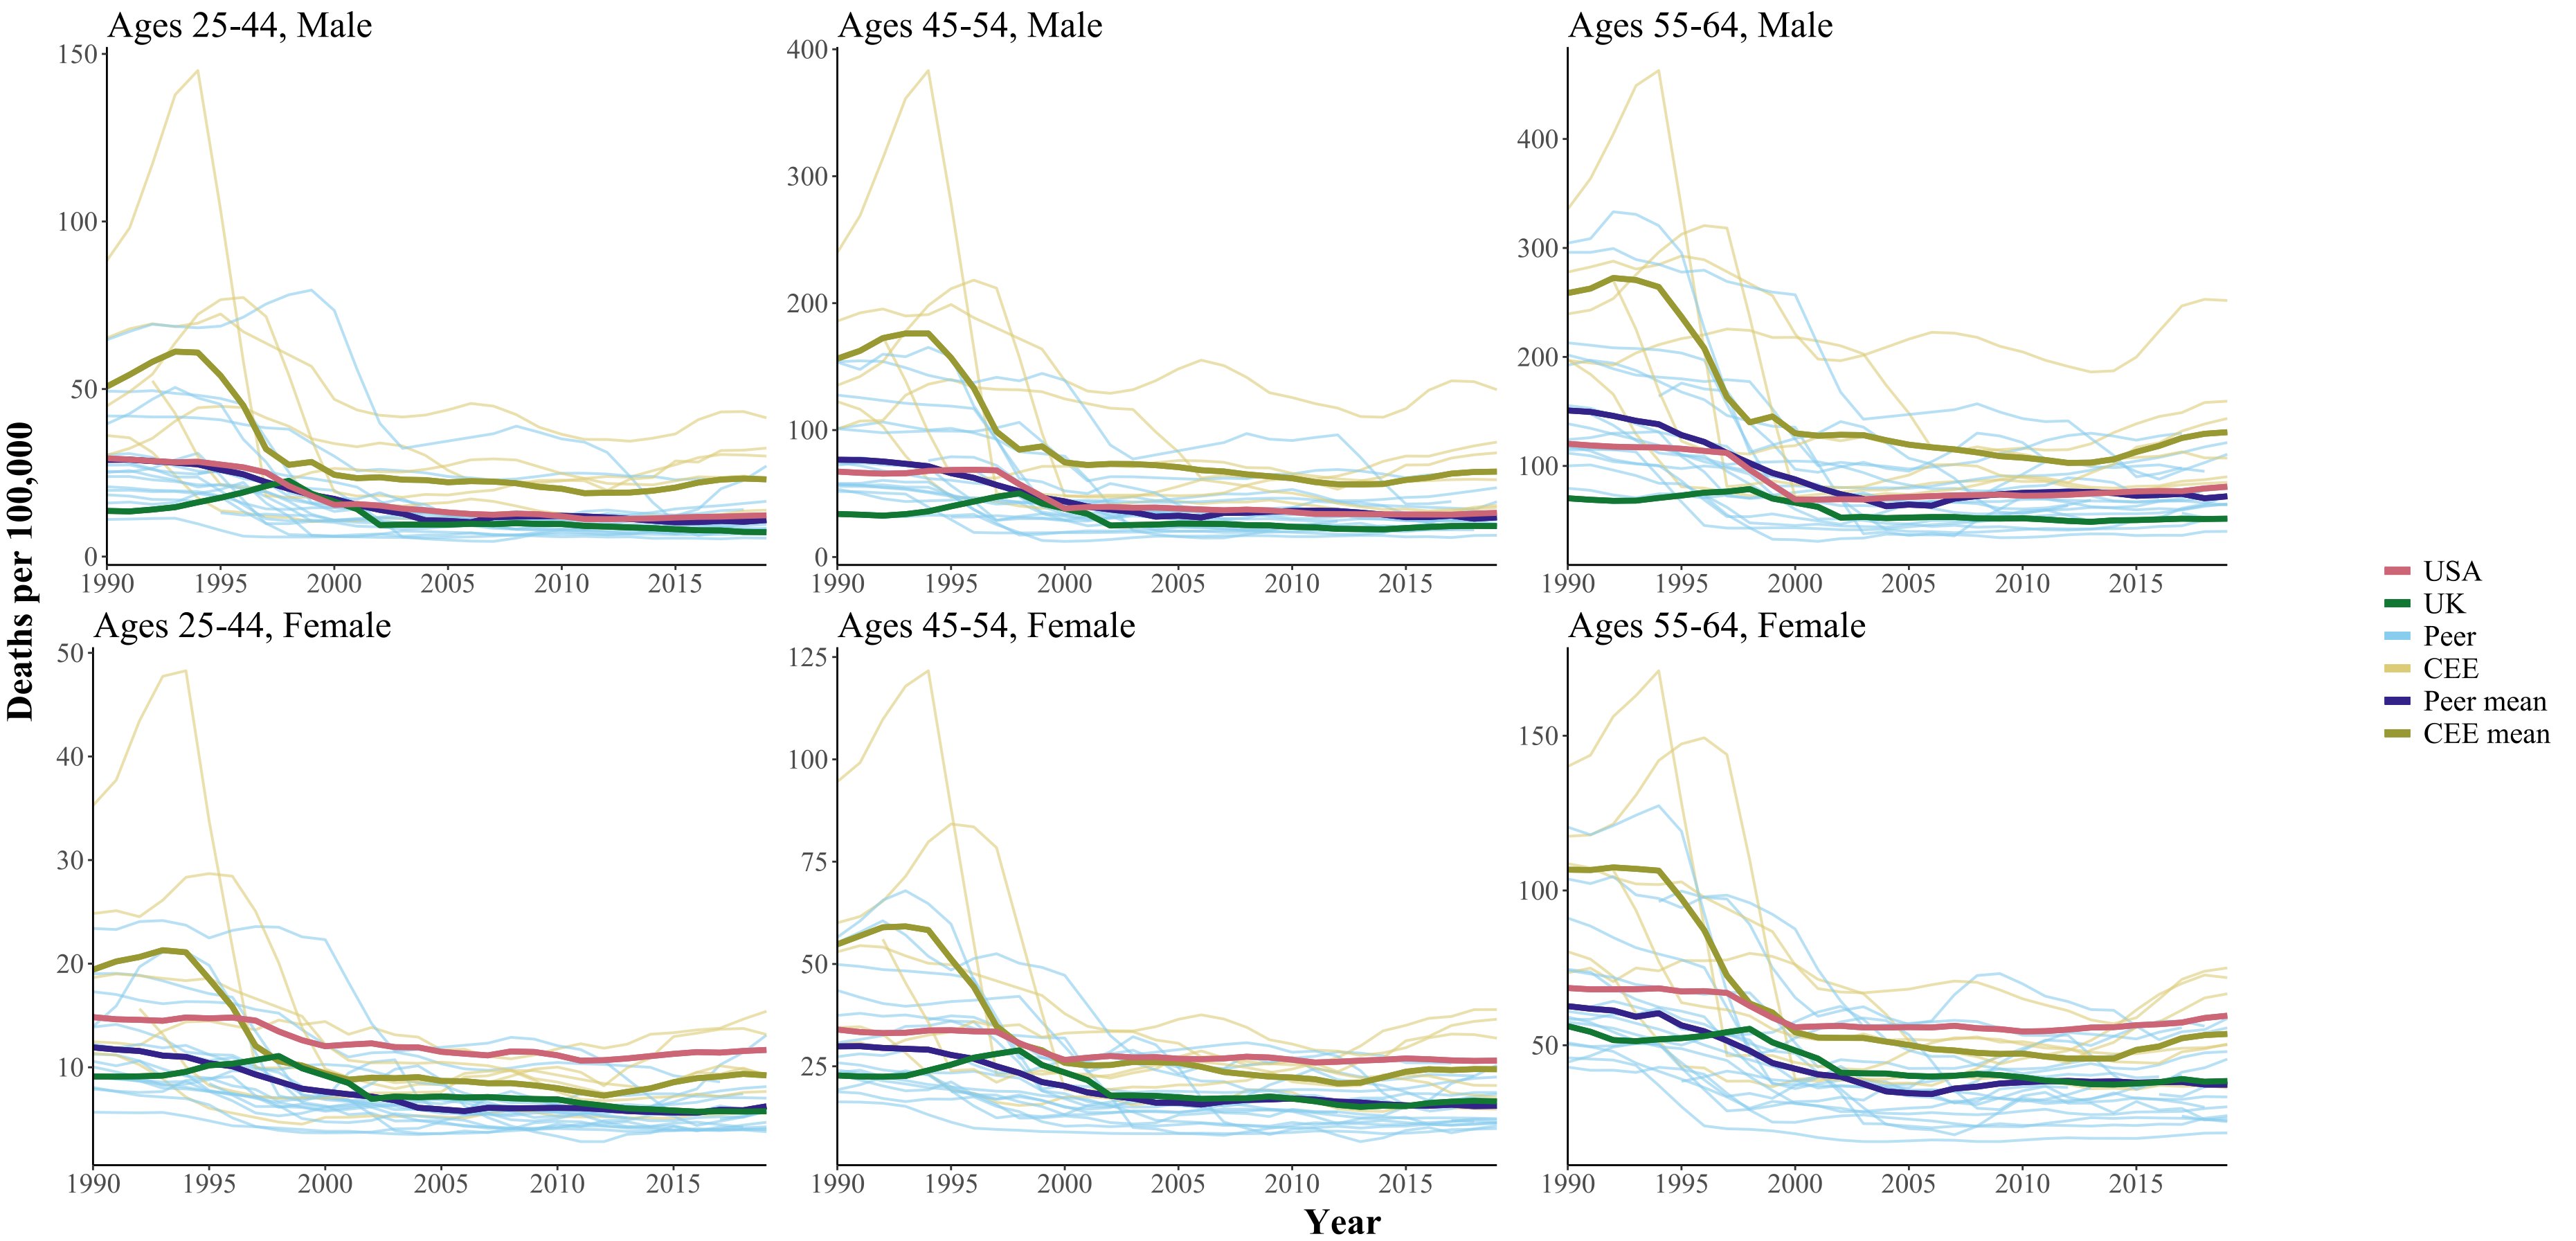

**Figure S14. Age-Standardized Mortality from All Causes, Years 1990-2019**

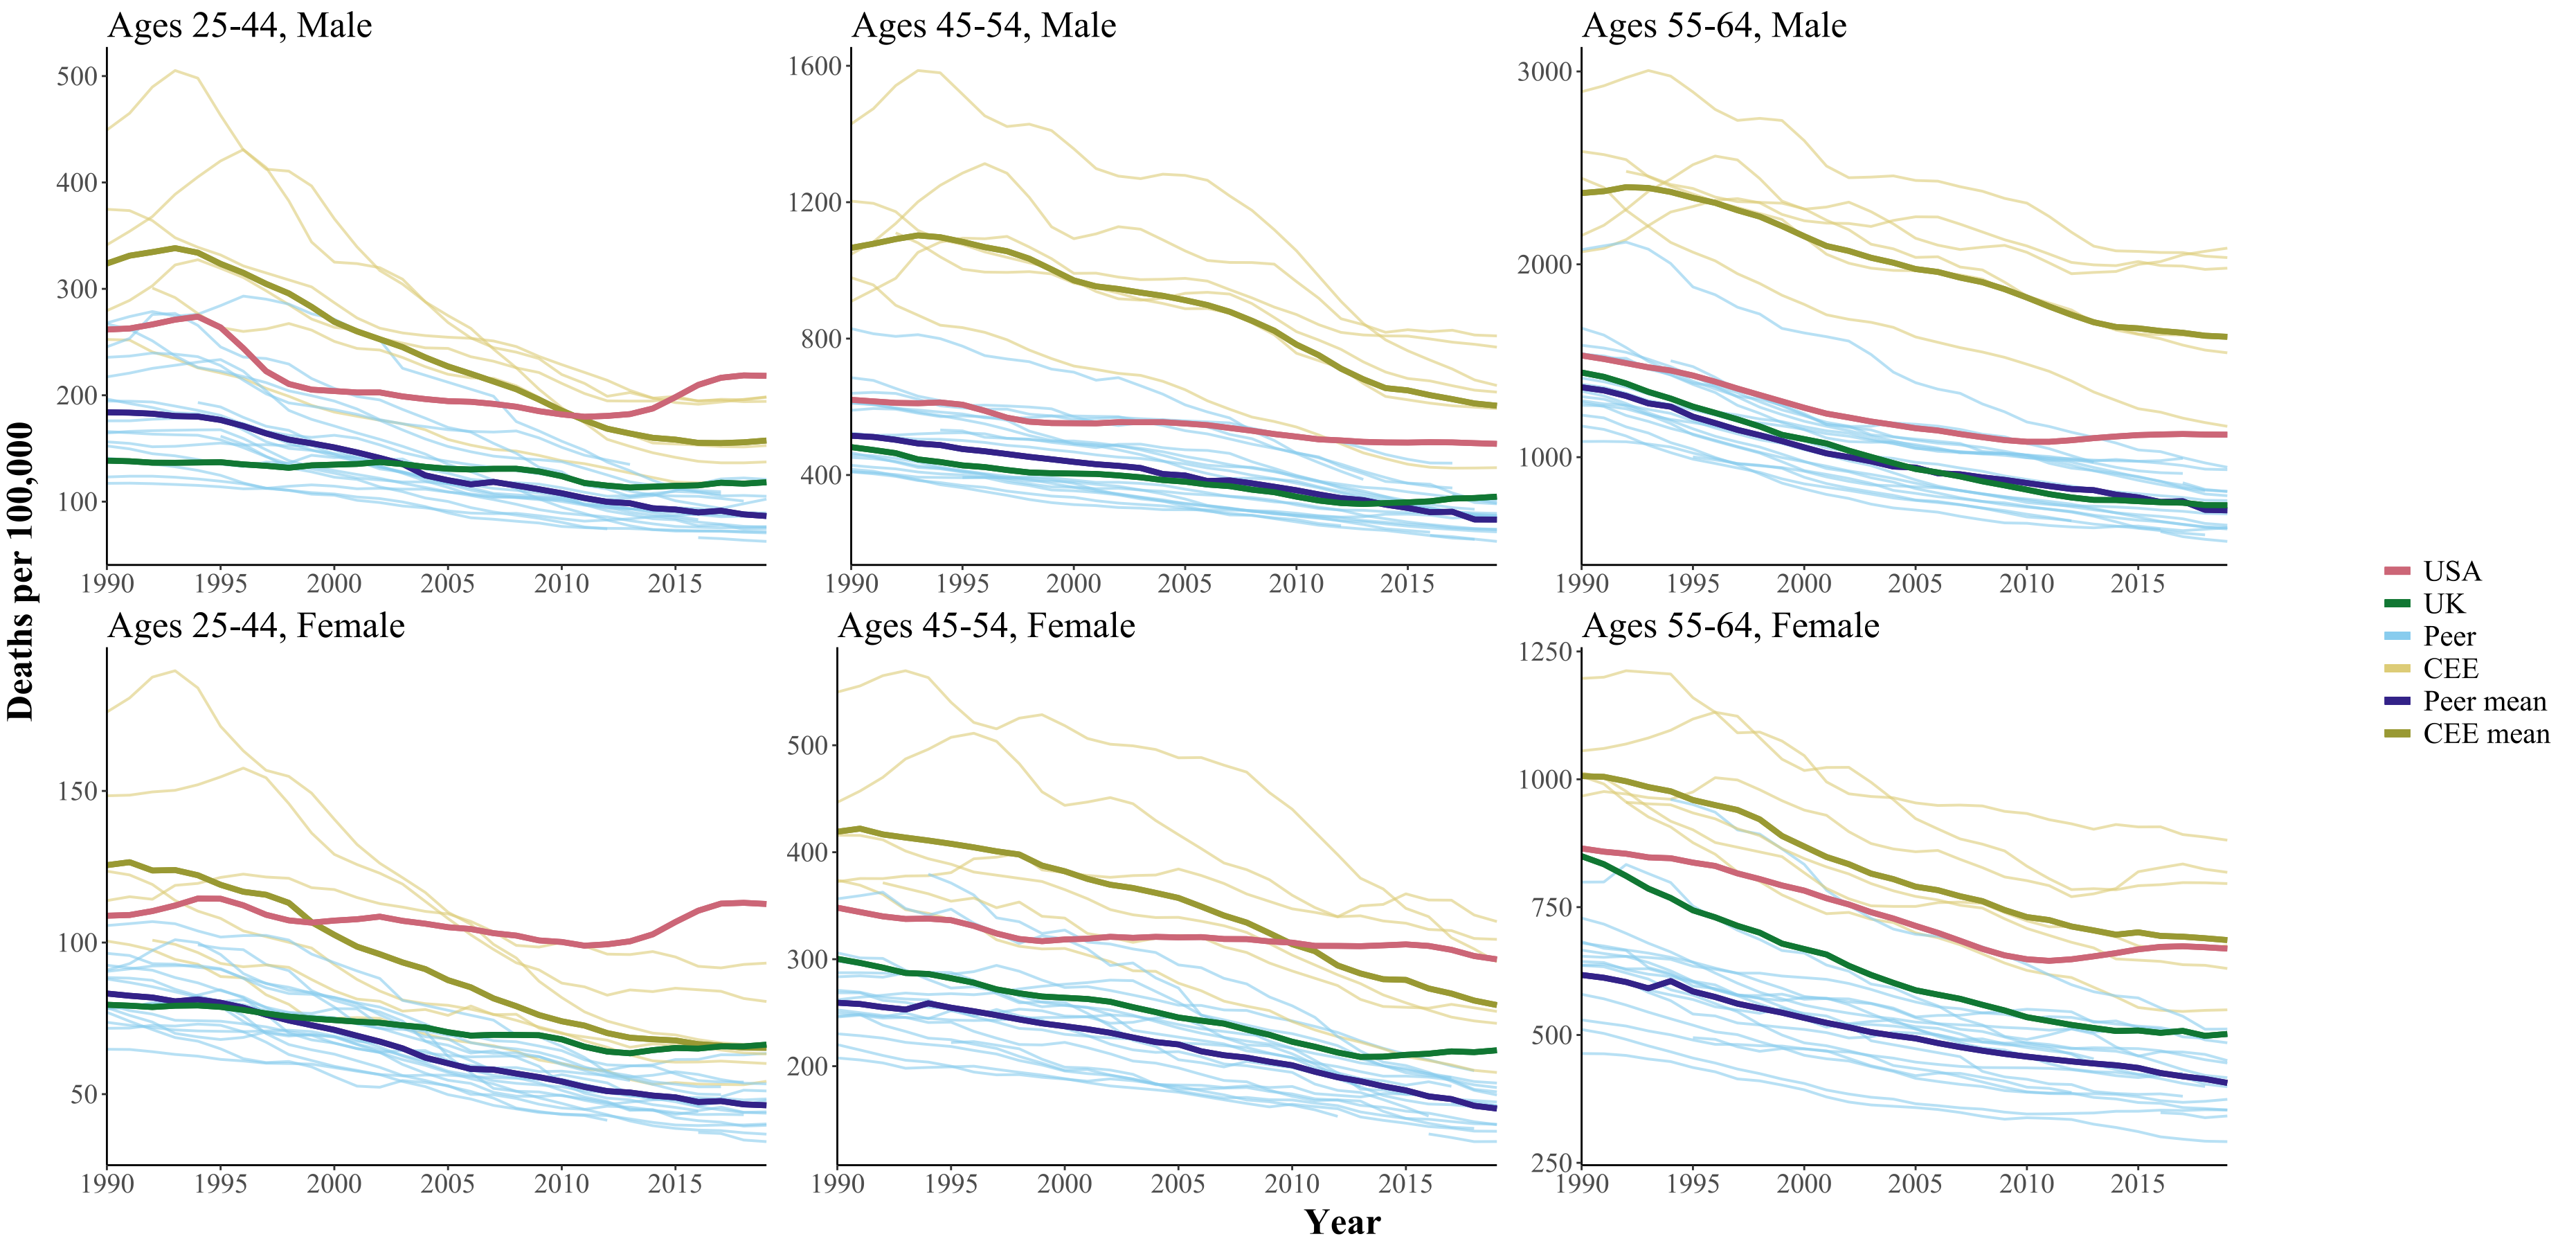

**Figure S15. Age-Standardized Mortality from Drug-Related Causes, Years 2000-2019**

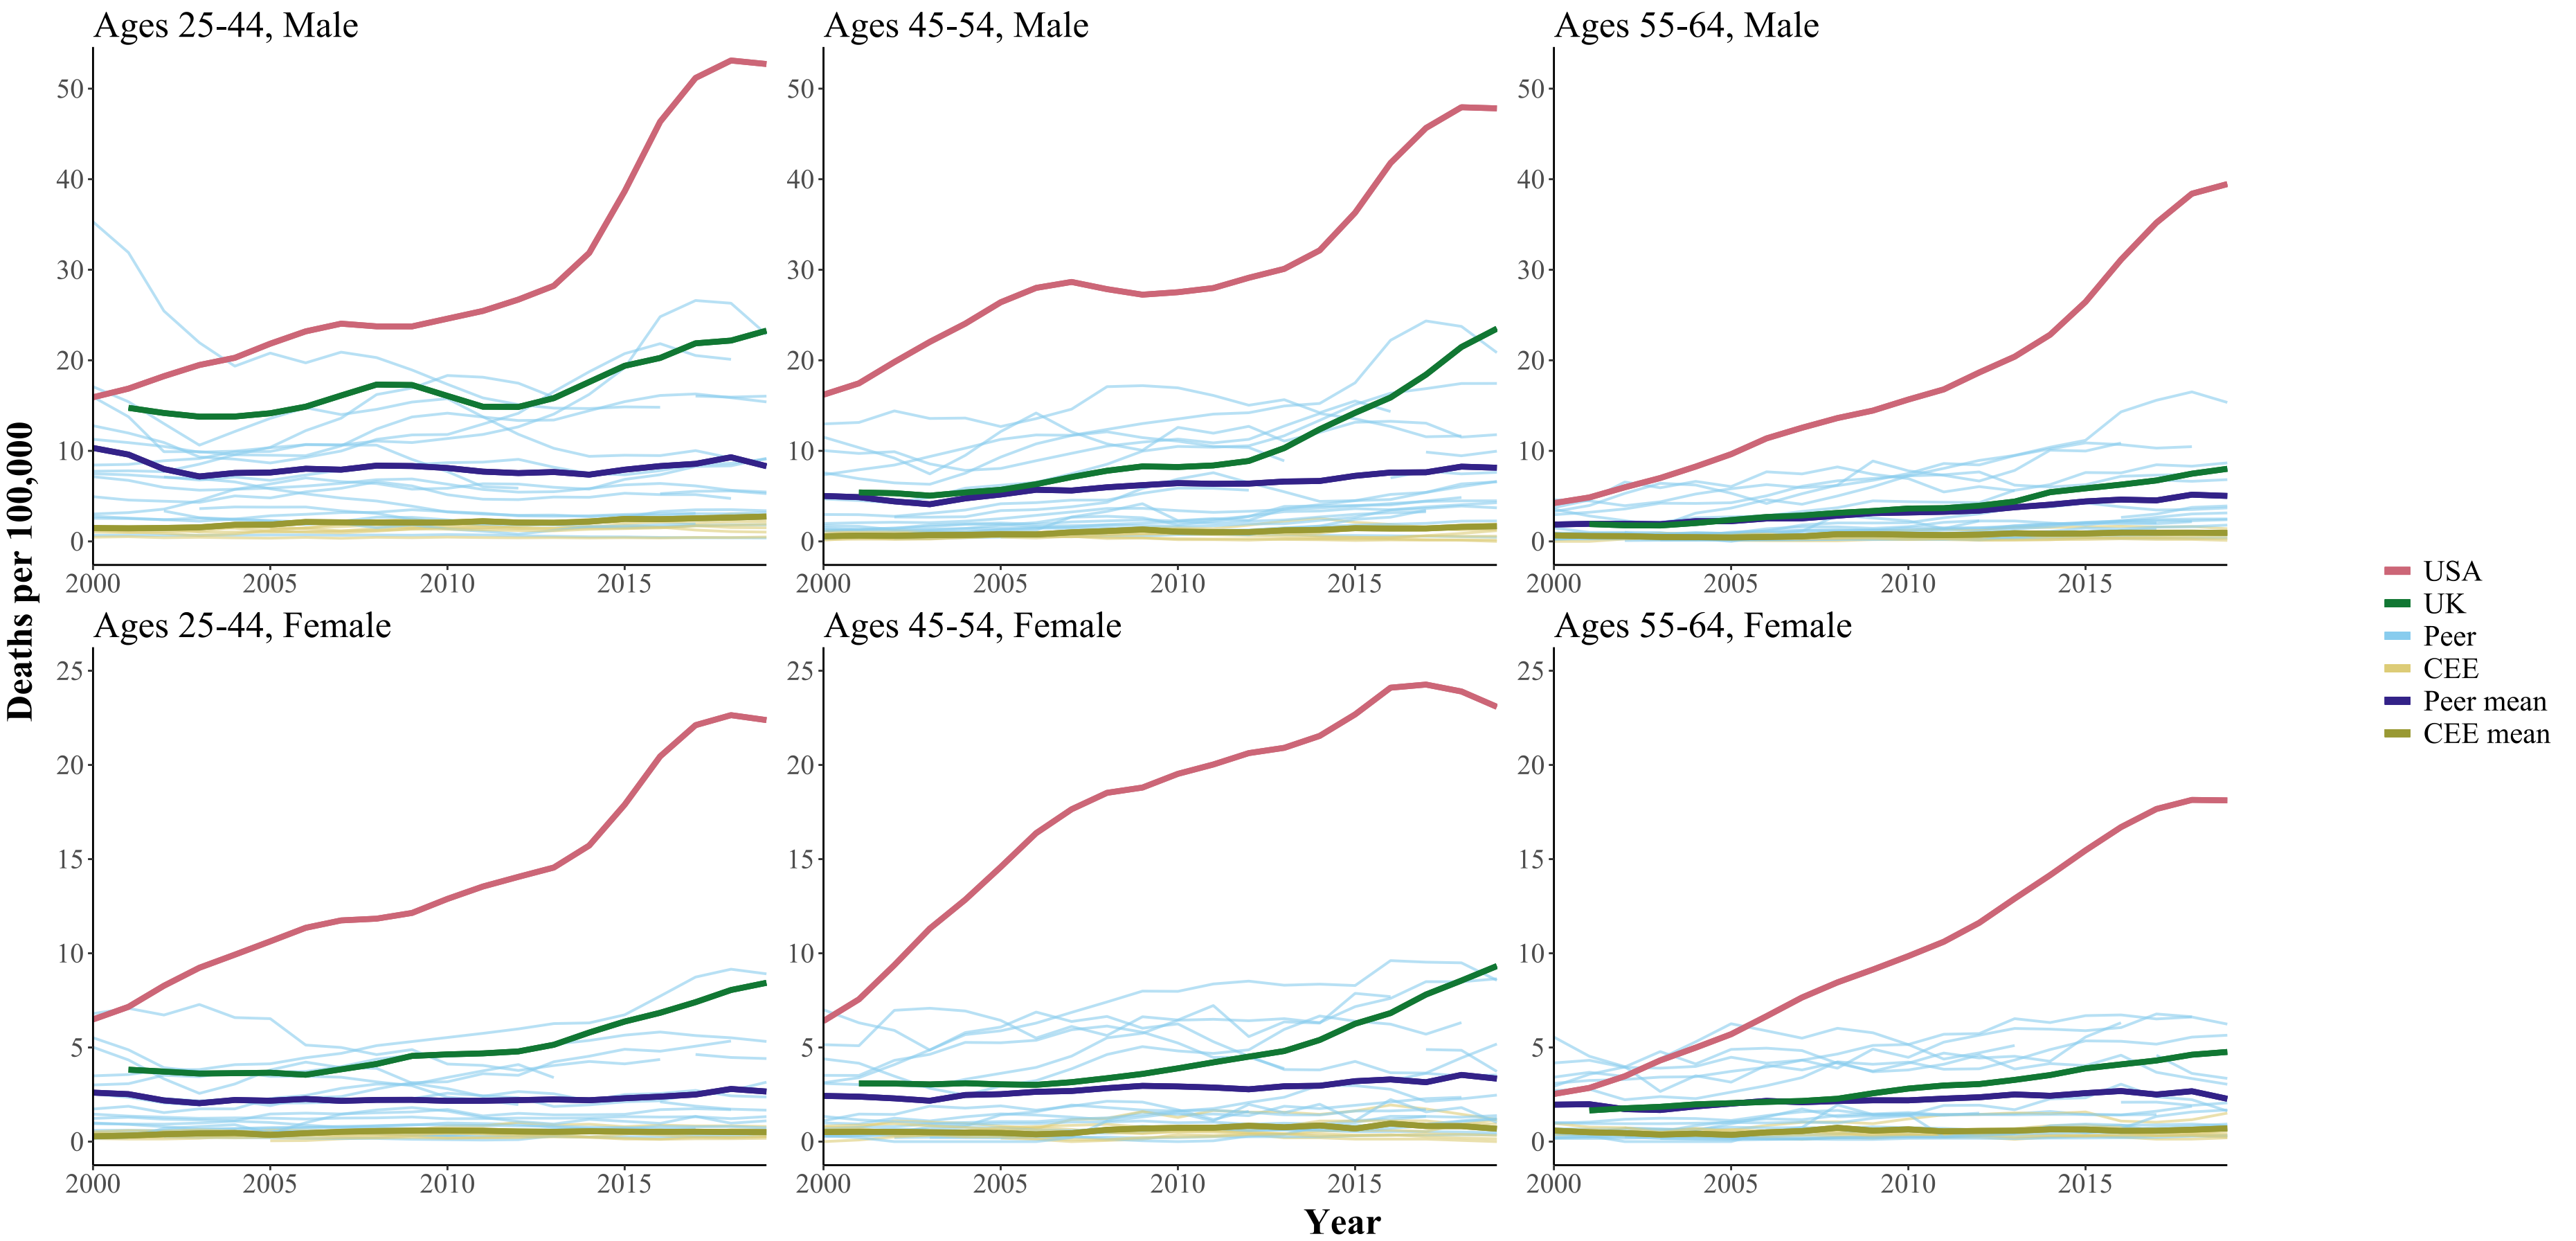

**Figure S16. Age-Standardized Mortality from Alcohol-Related Causes, Years 2000-2019**

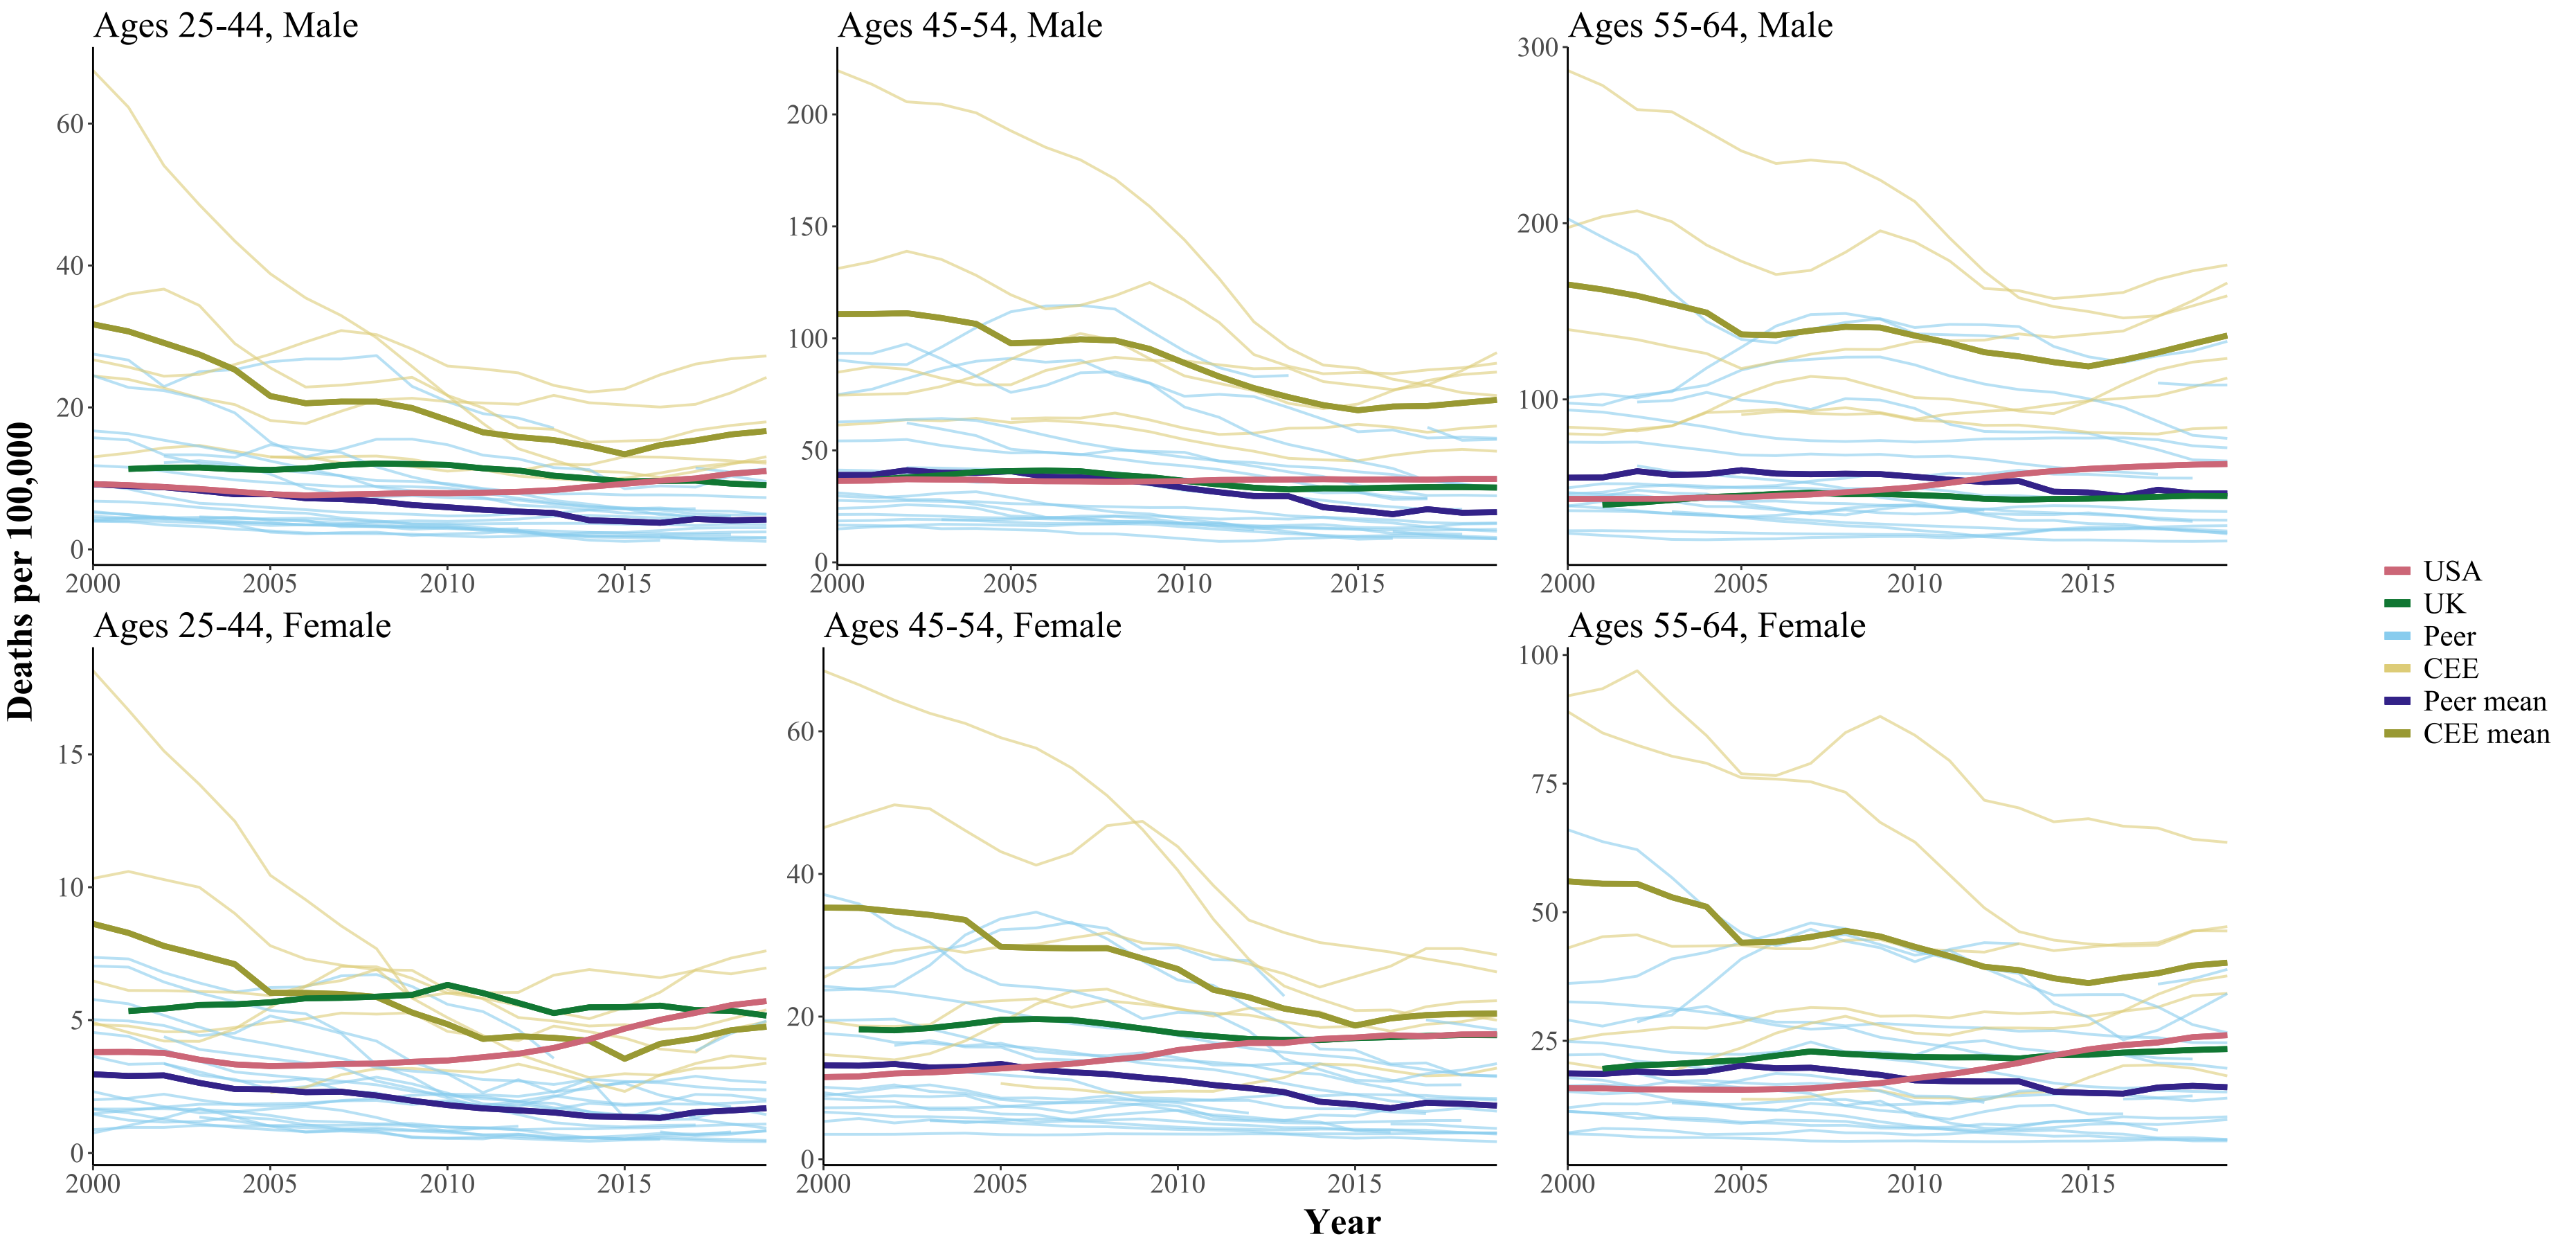

**Figure S17. Percent Change in Age-Standardized Mortality from the Baseline Year (1990), Infectious and Parasitic Diseases**

Percent Change in Deaths per 100 000

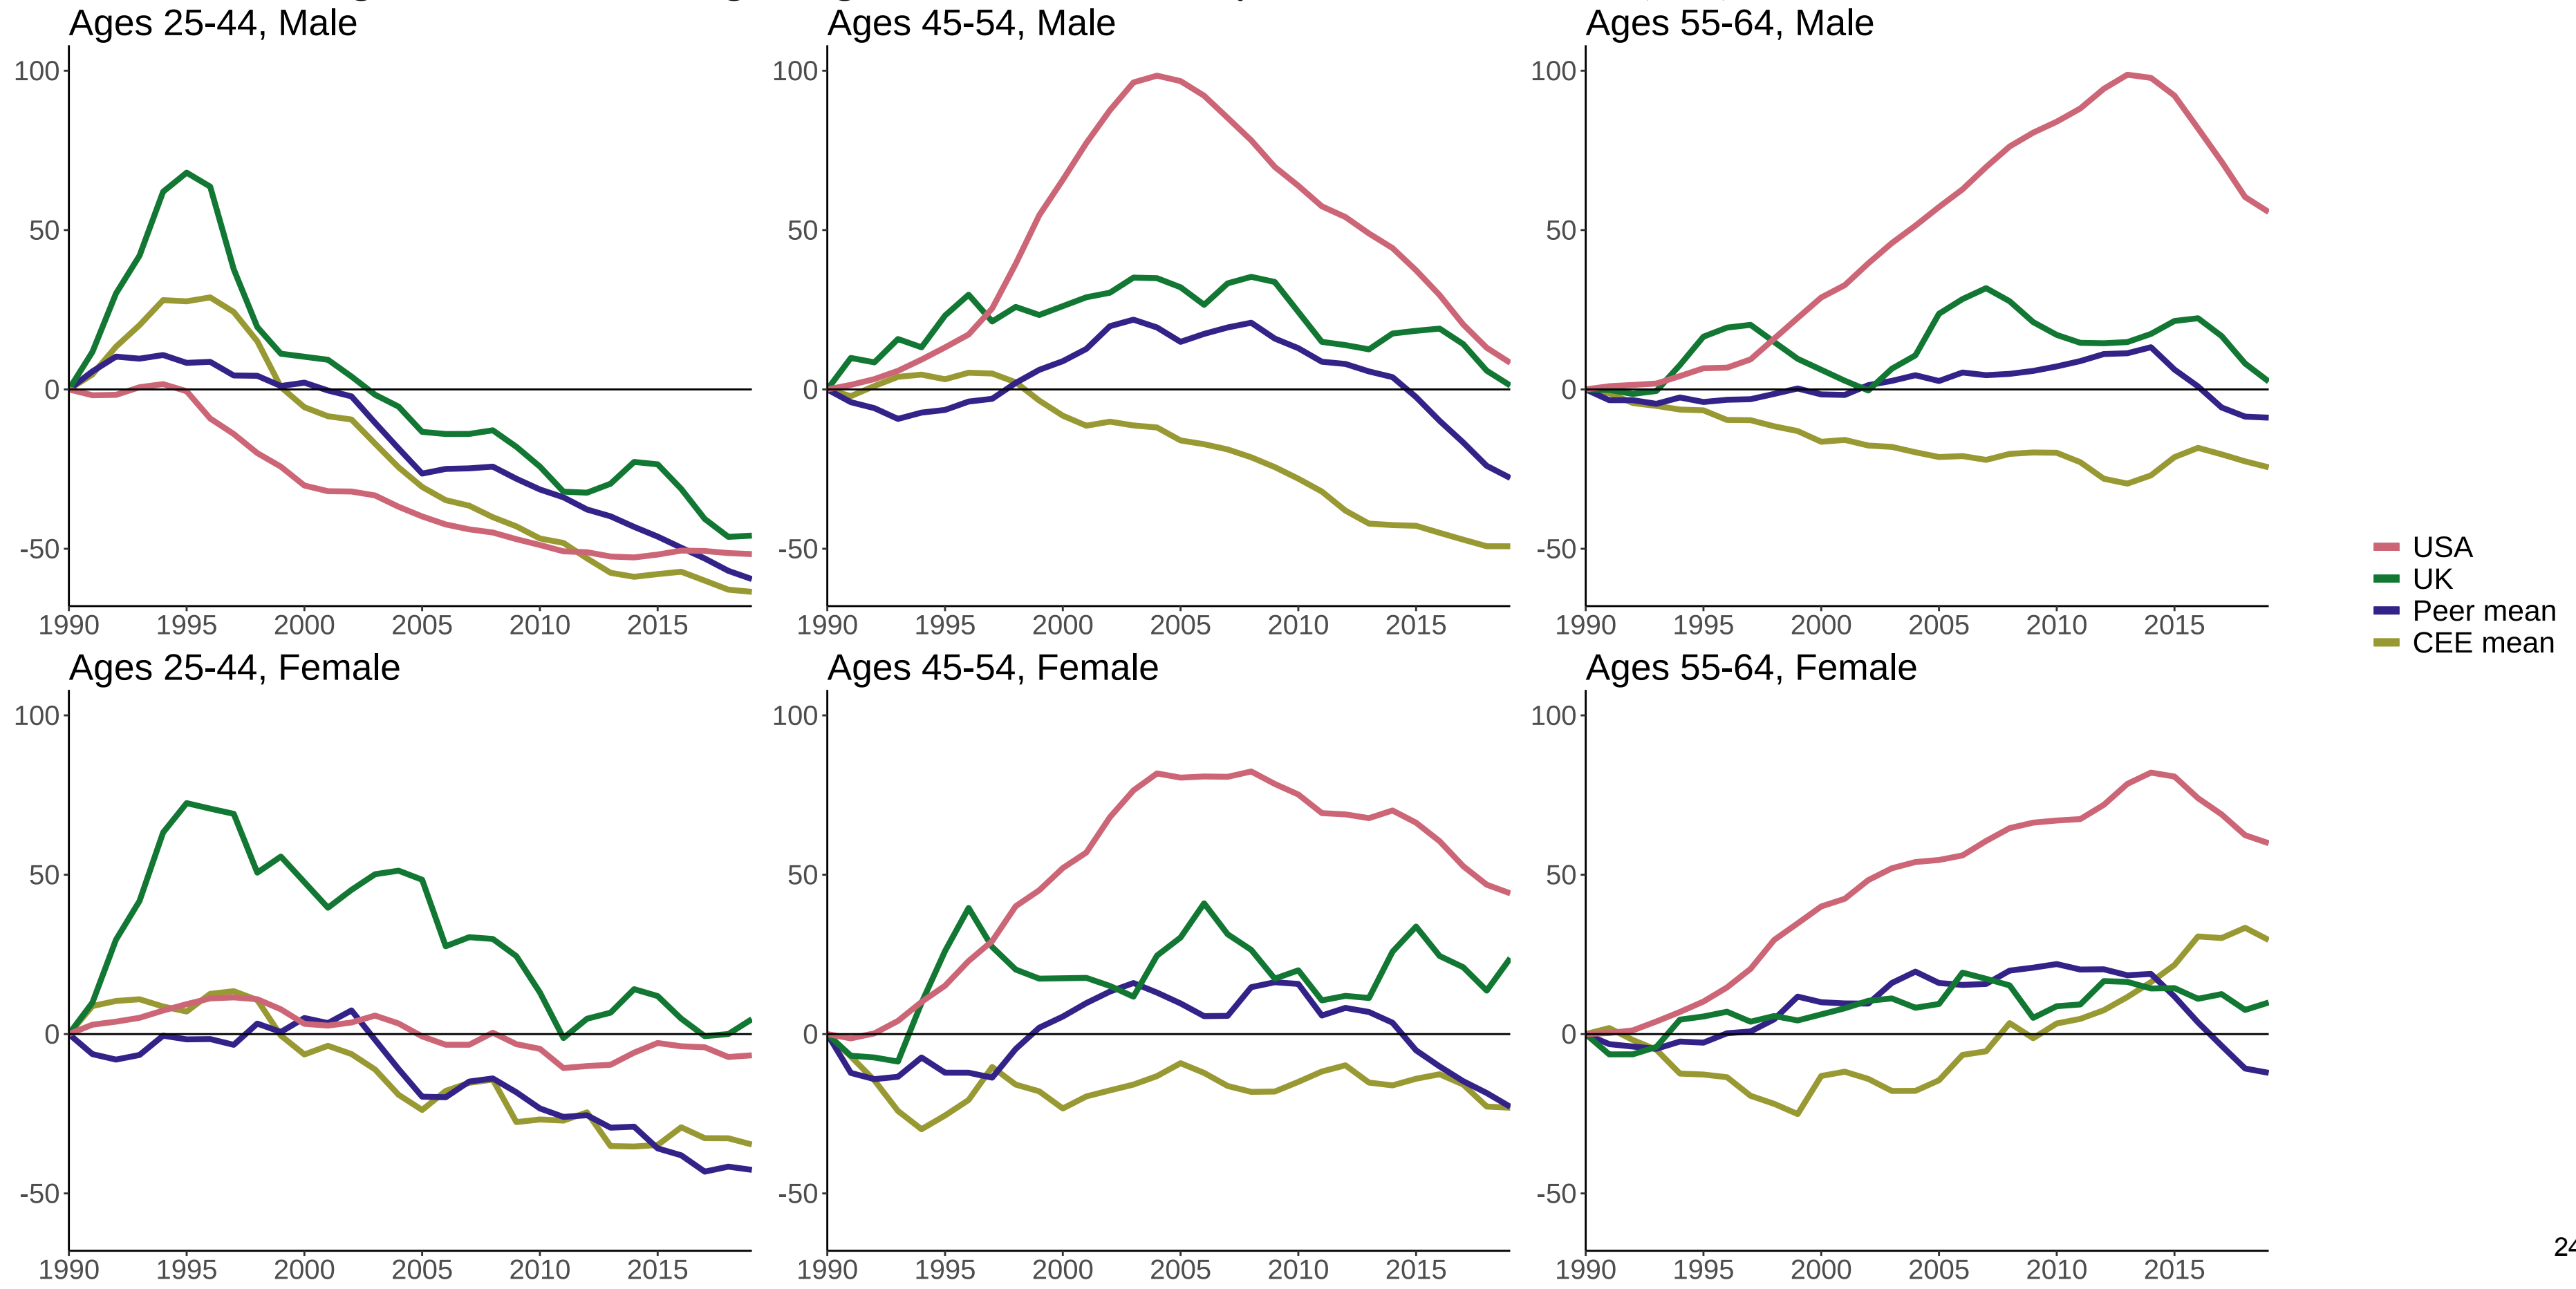

**Figure S18. Percent Change in Age-Standardized Mortality from the Baseline Year (1990), HIV/AIDS**

Percent Change in Deaths per 100 000

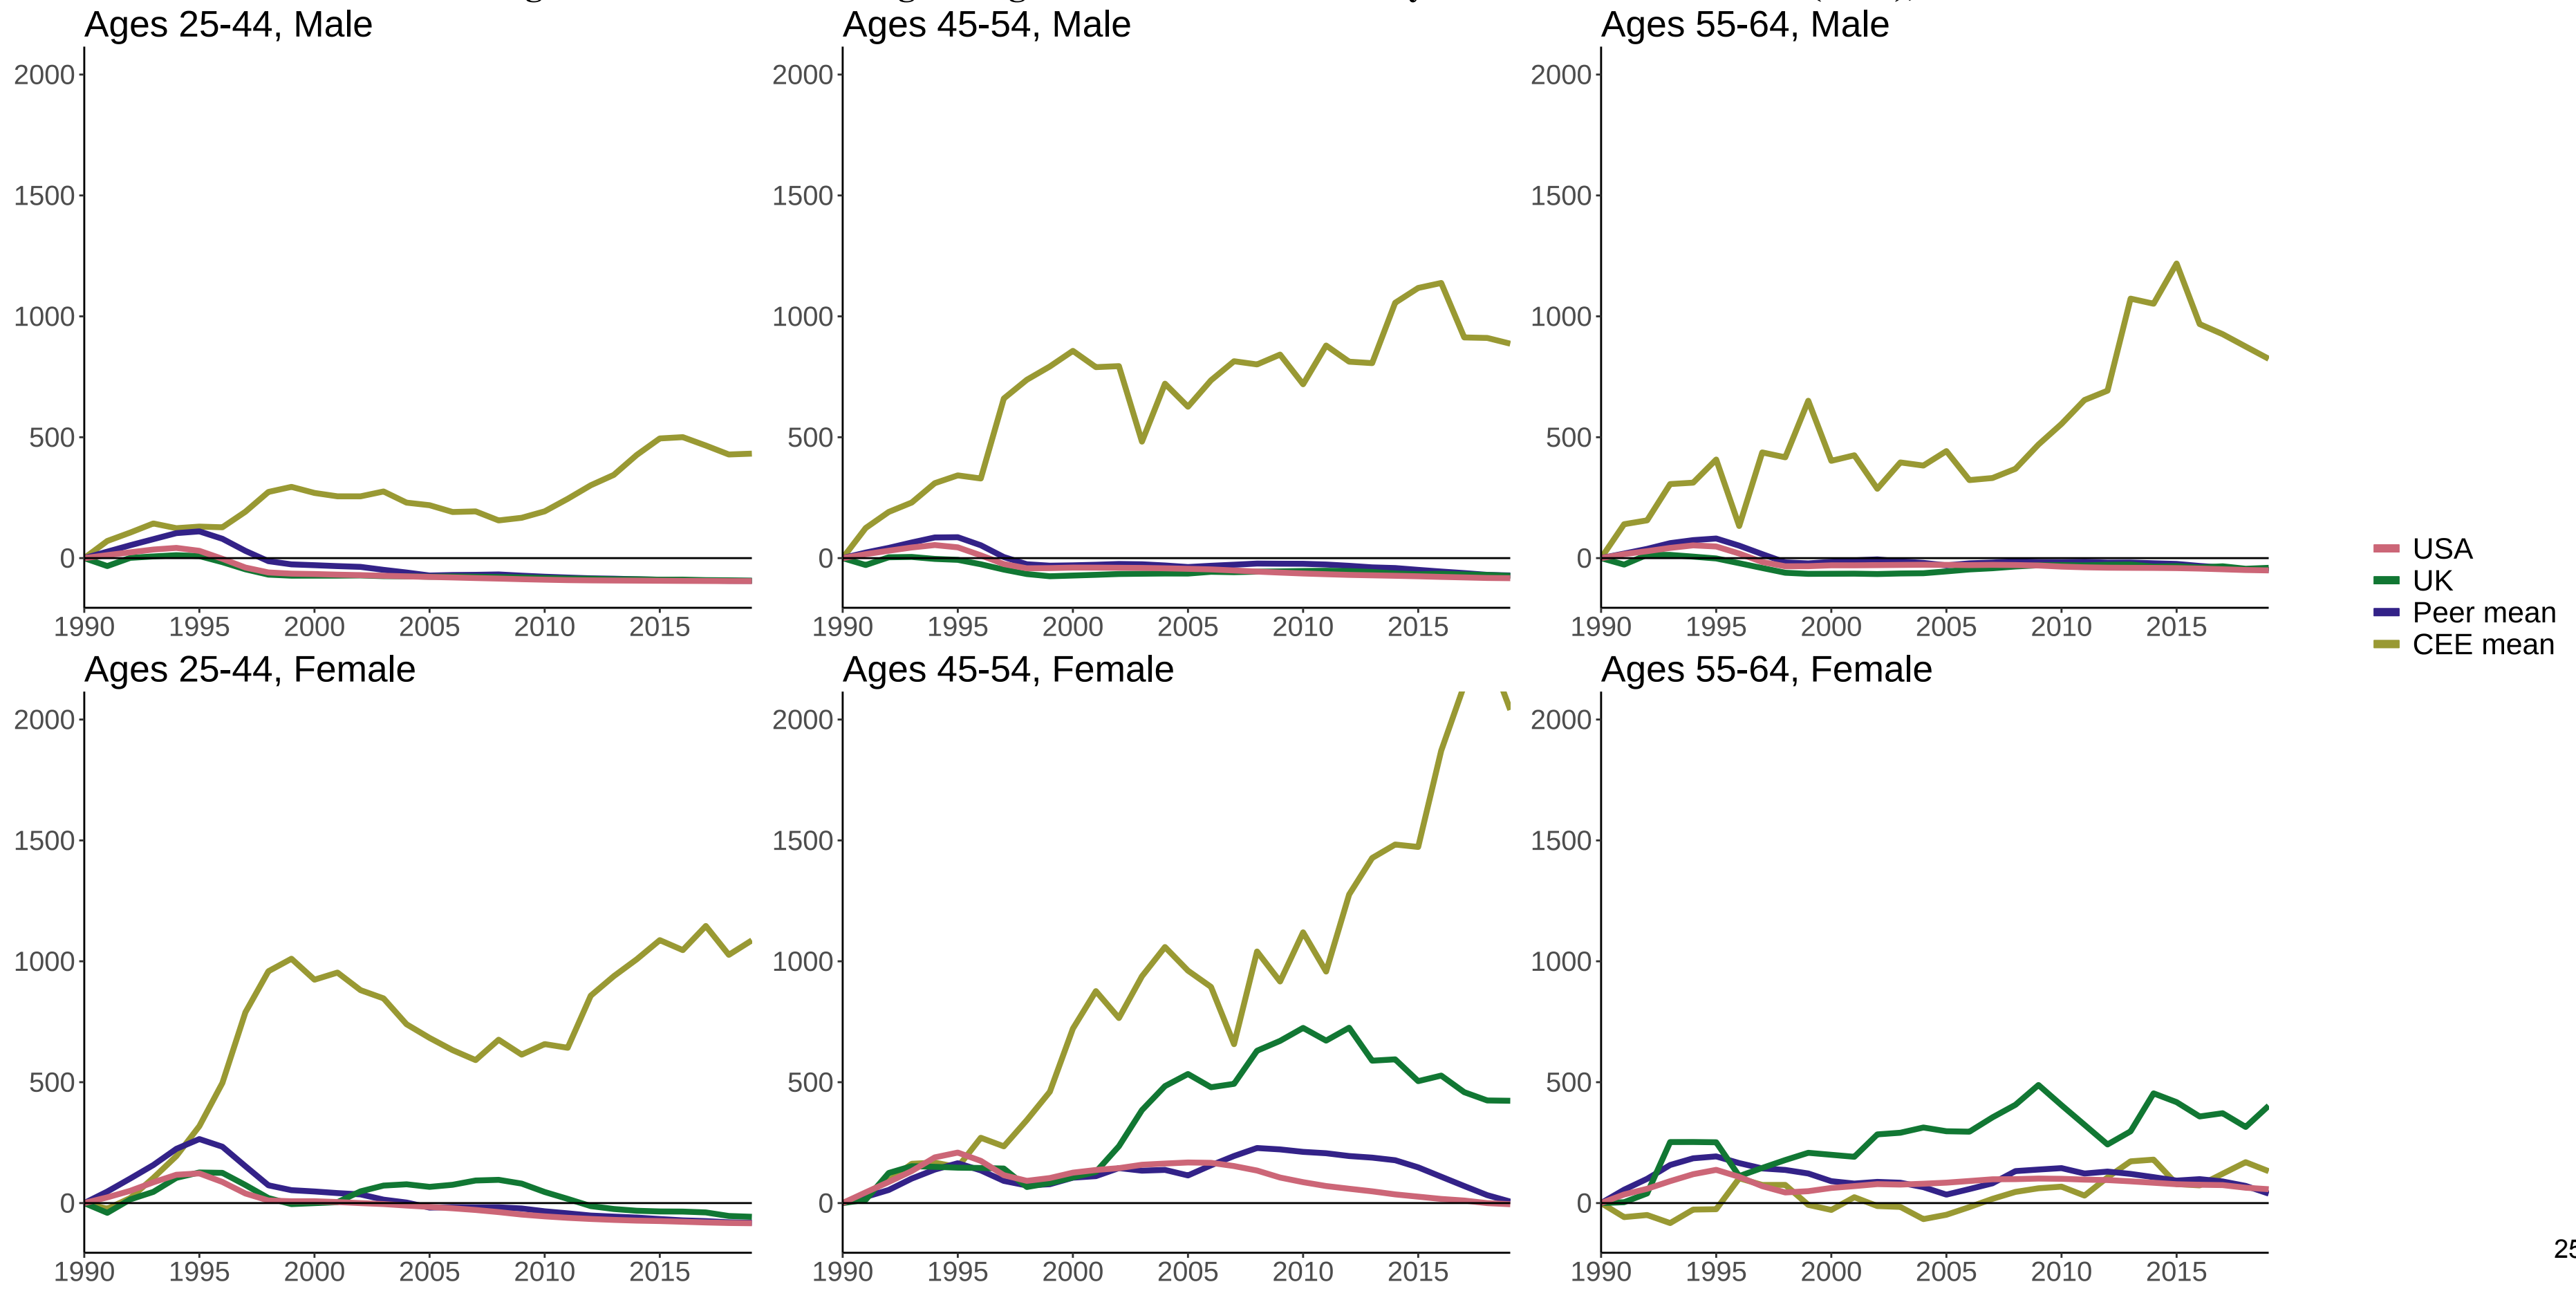

**Figure S19. Percent Change in Age-Standardized Mortality from the Baseline Year (1990), Respiratory Diseases**

Percent Change in Deaths per 100 000

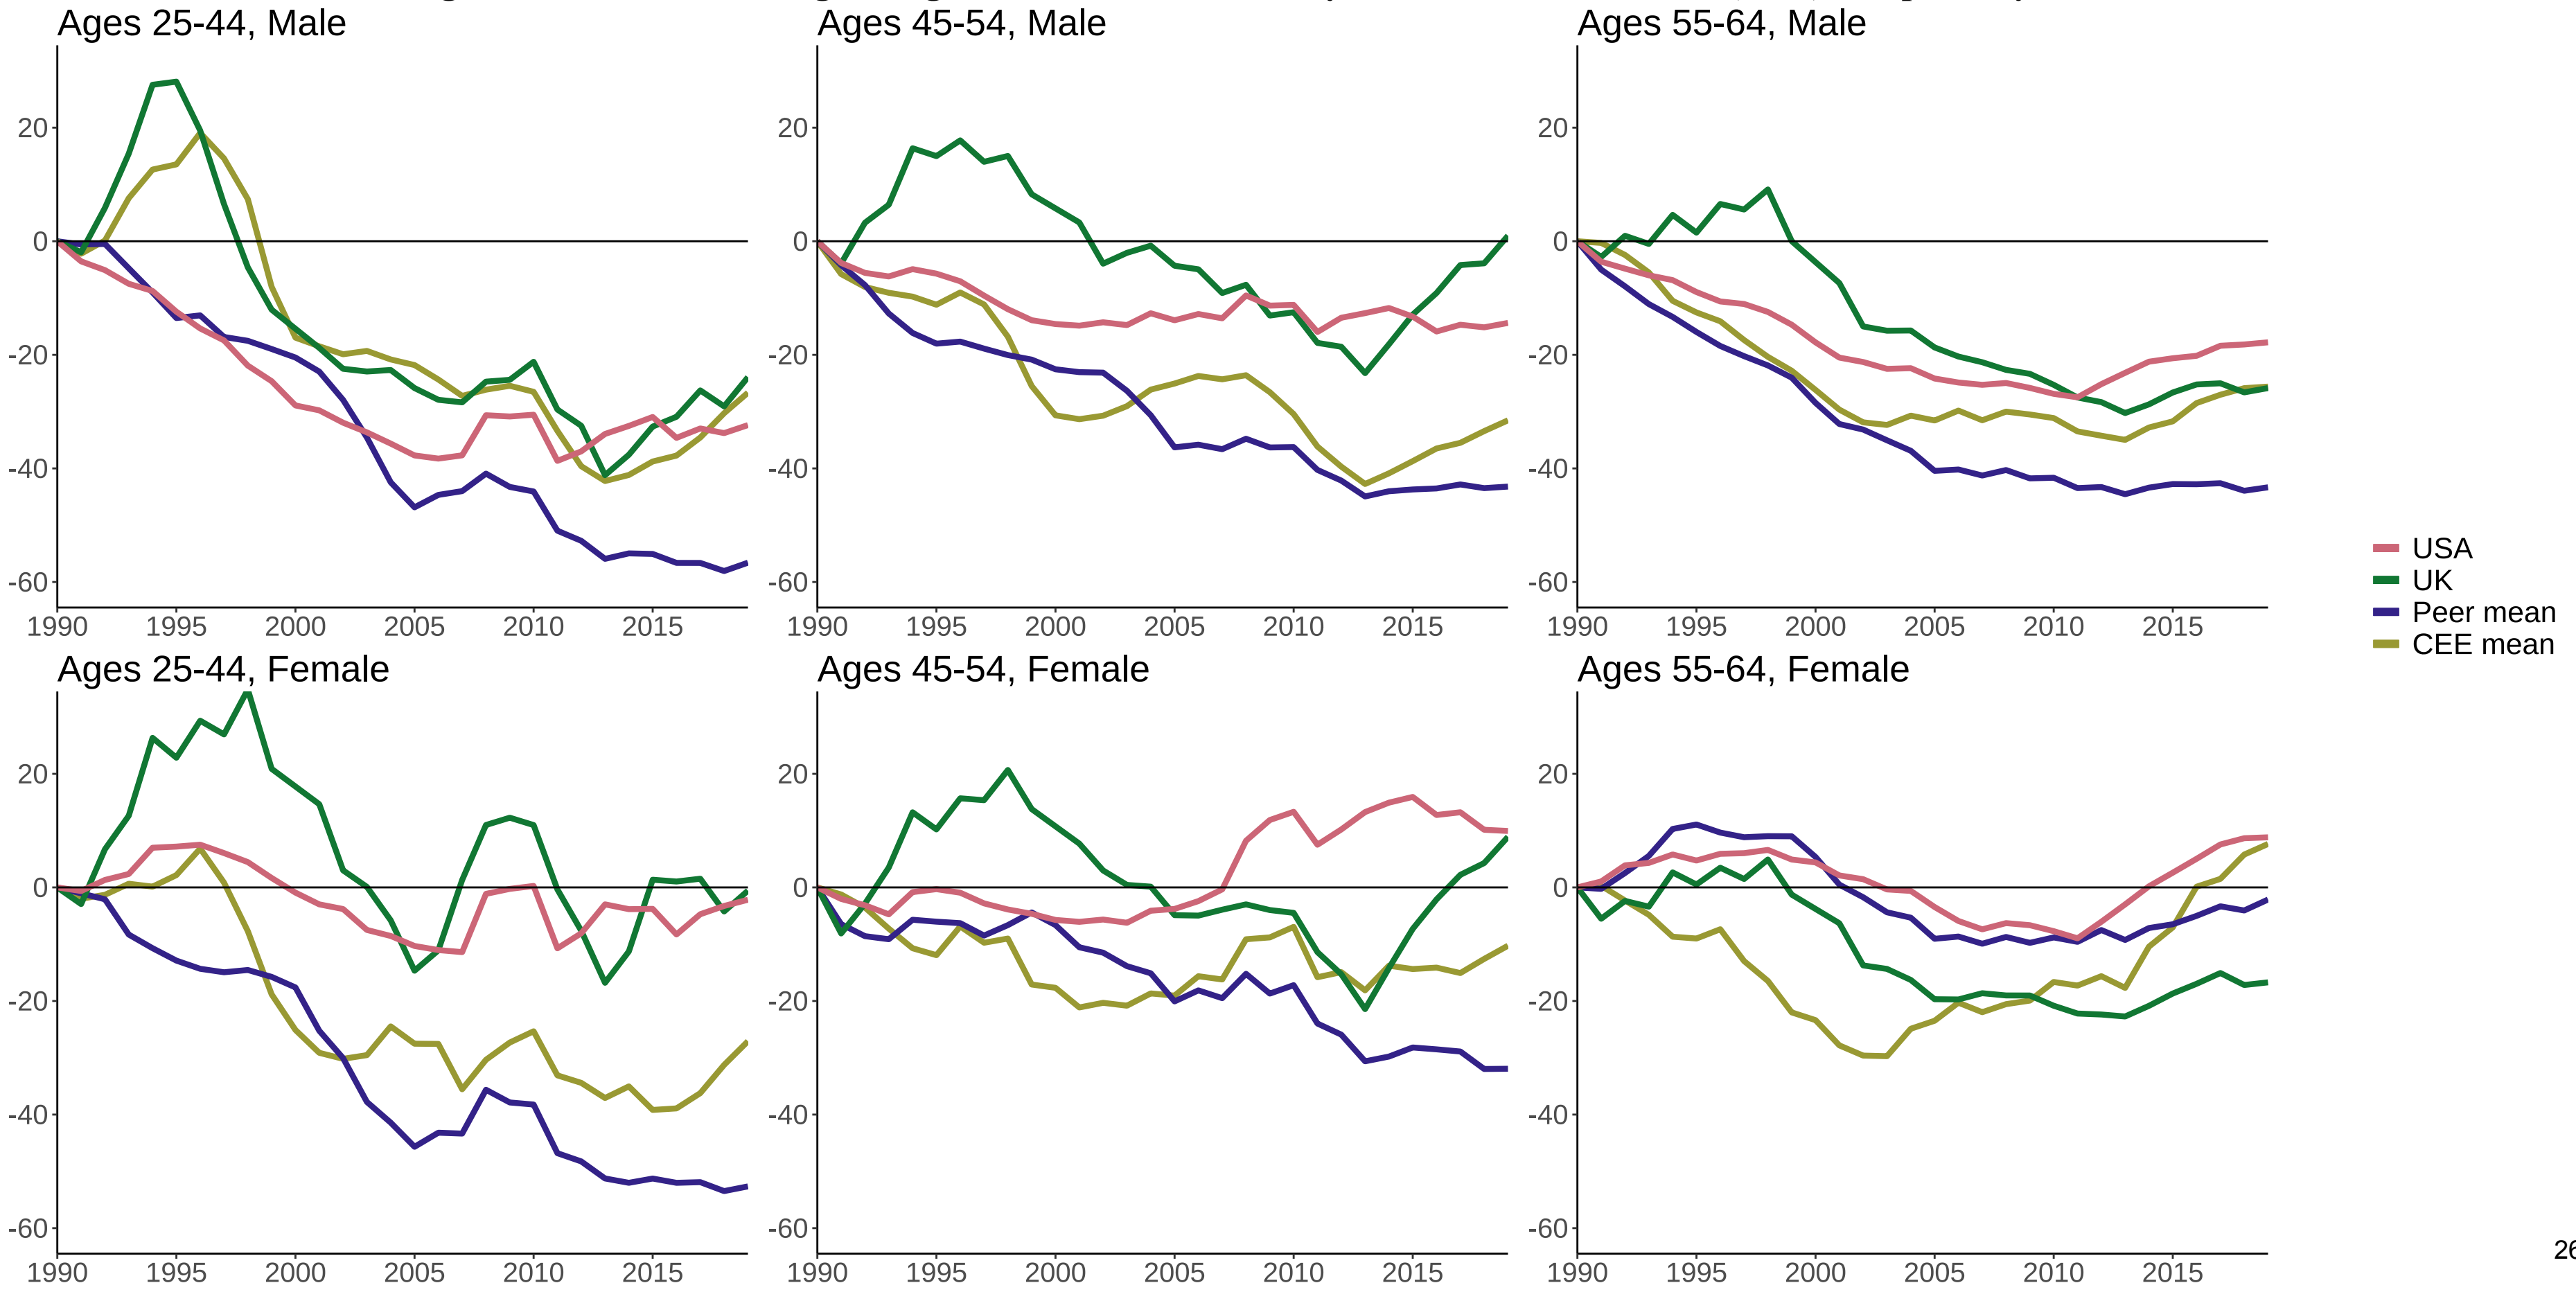

**Figure S20. Percent Change in Age-Standardized Mortality from the Baseline Year (1990), Trachea/Bronchus, Lung Cancers**

Percent Change in Deaths per 100 000

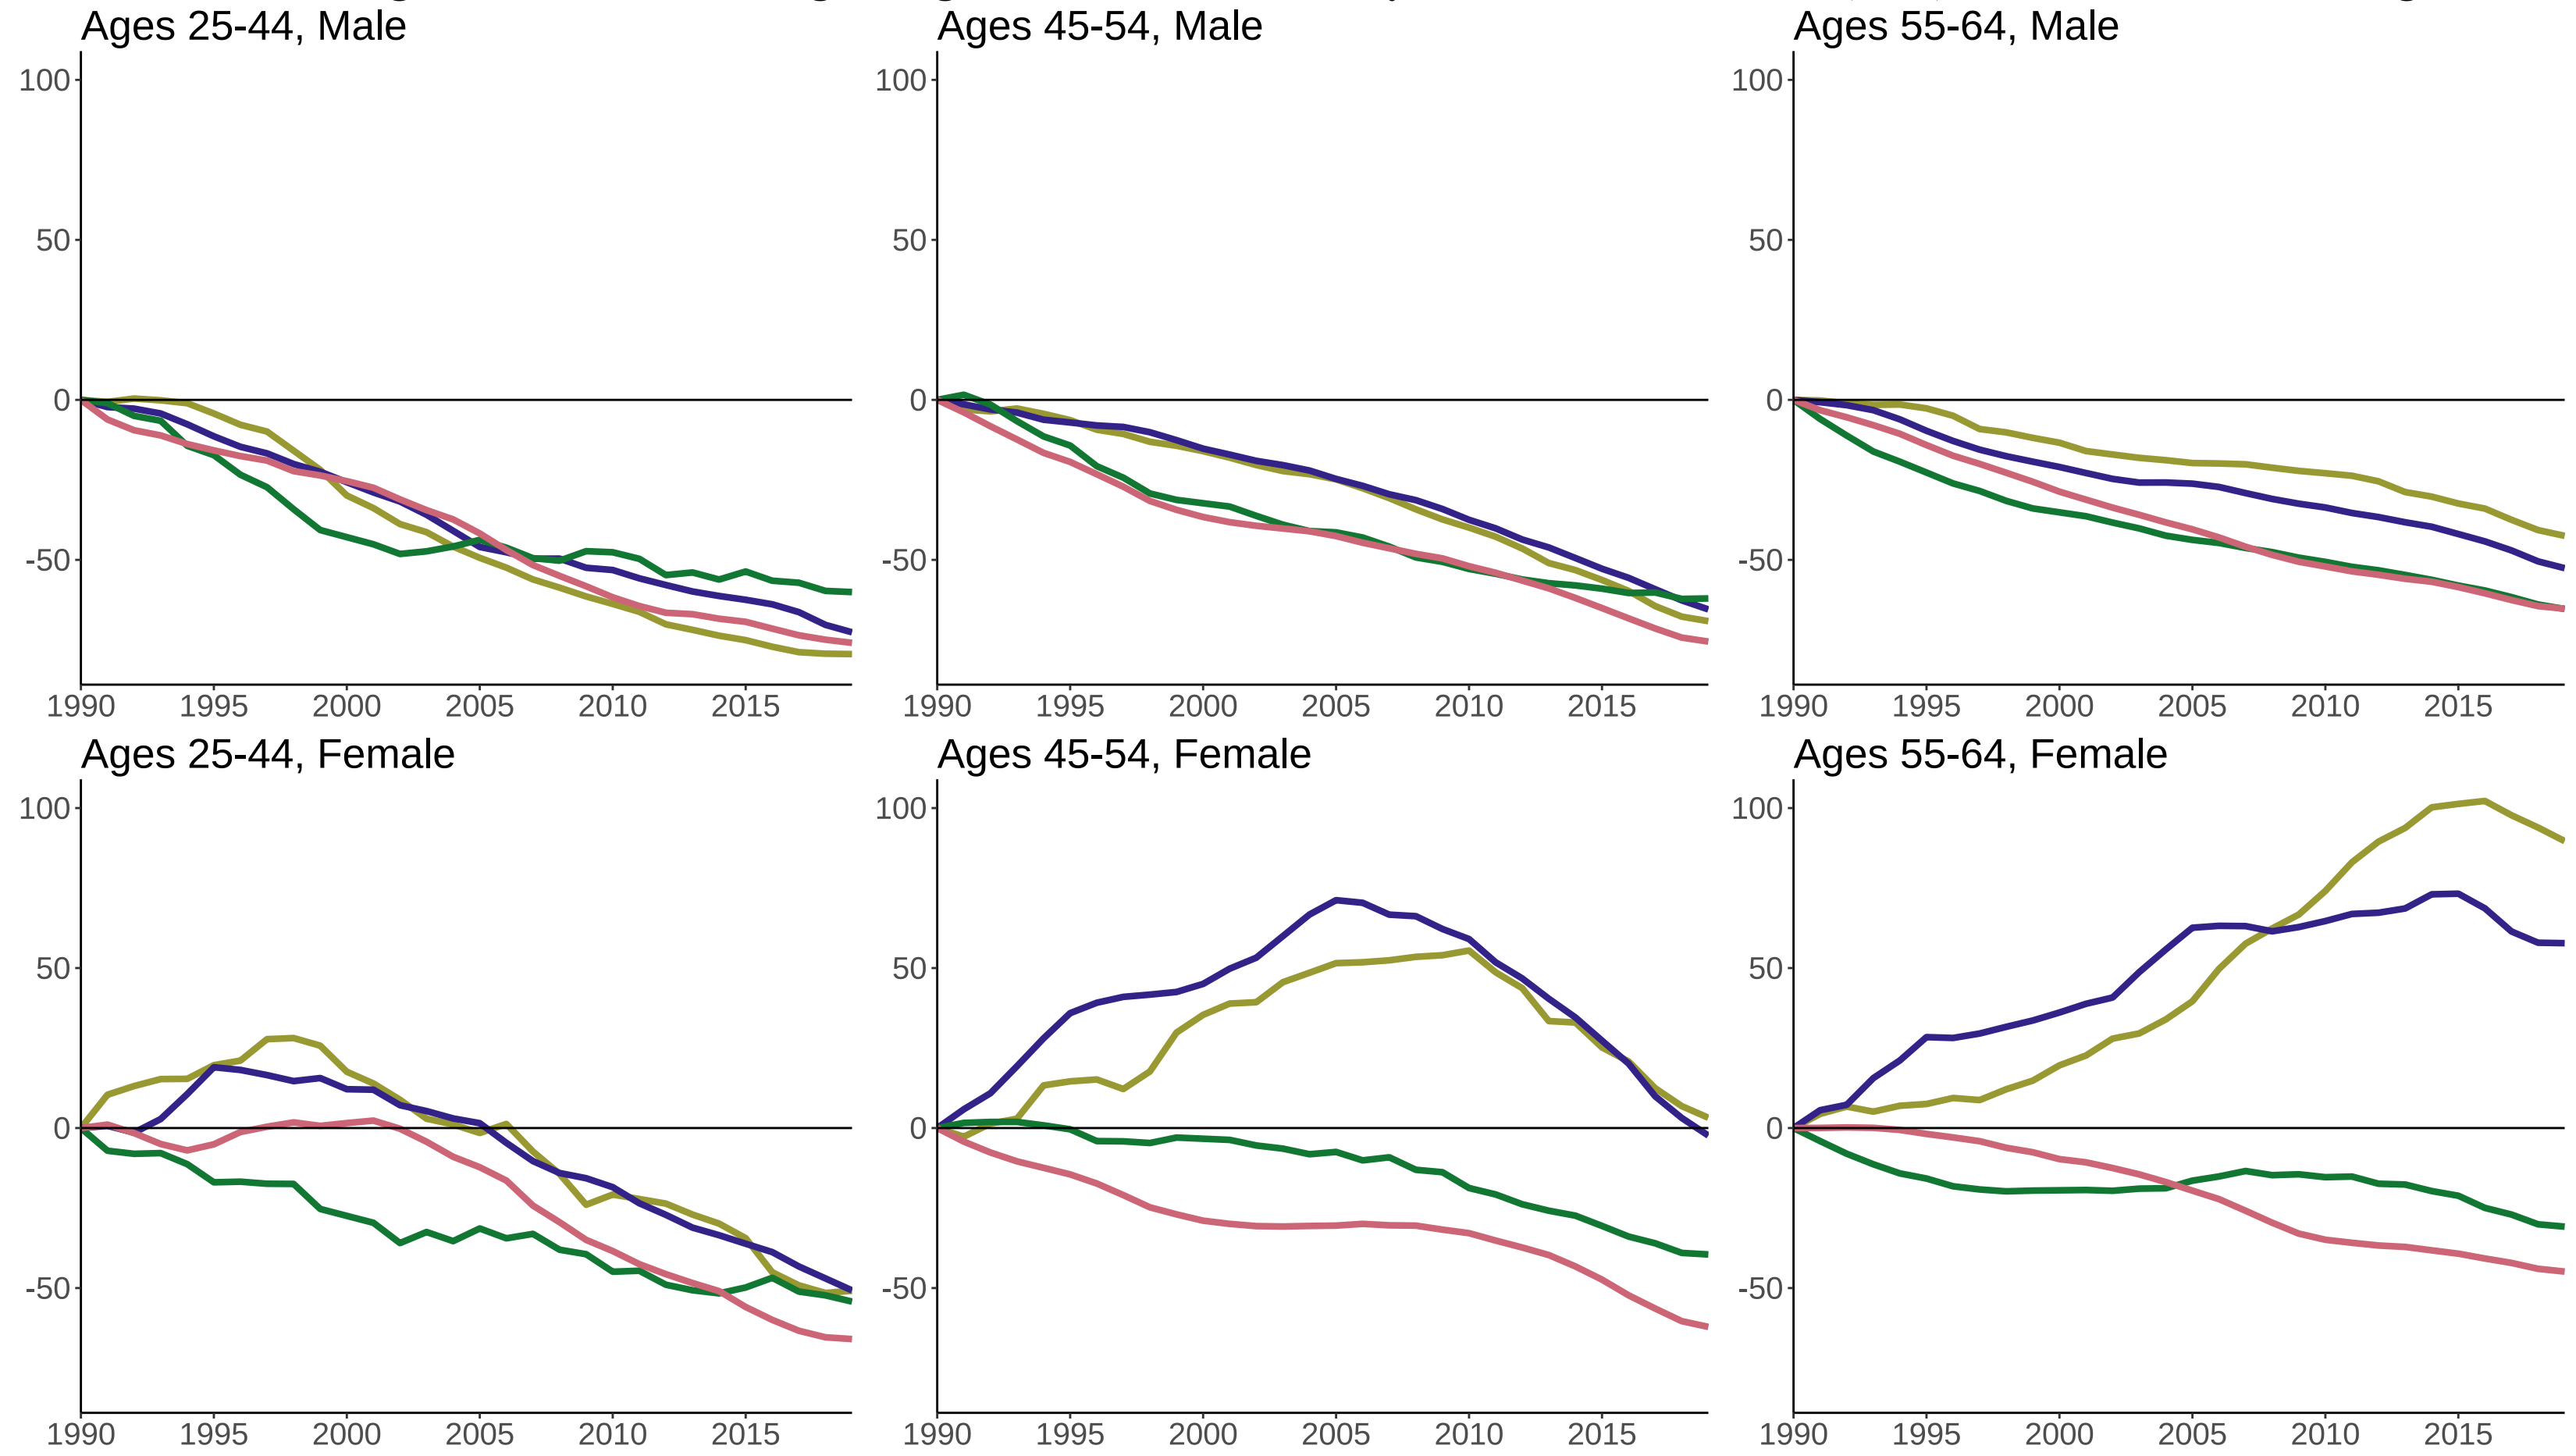

**Figure S21. Percent Change in Age-Standardized Mortality from the Baseline Year (1990), All Other Cancers**

Percent Change in Deaths per 100 000

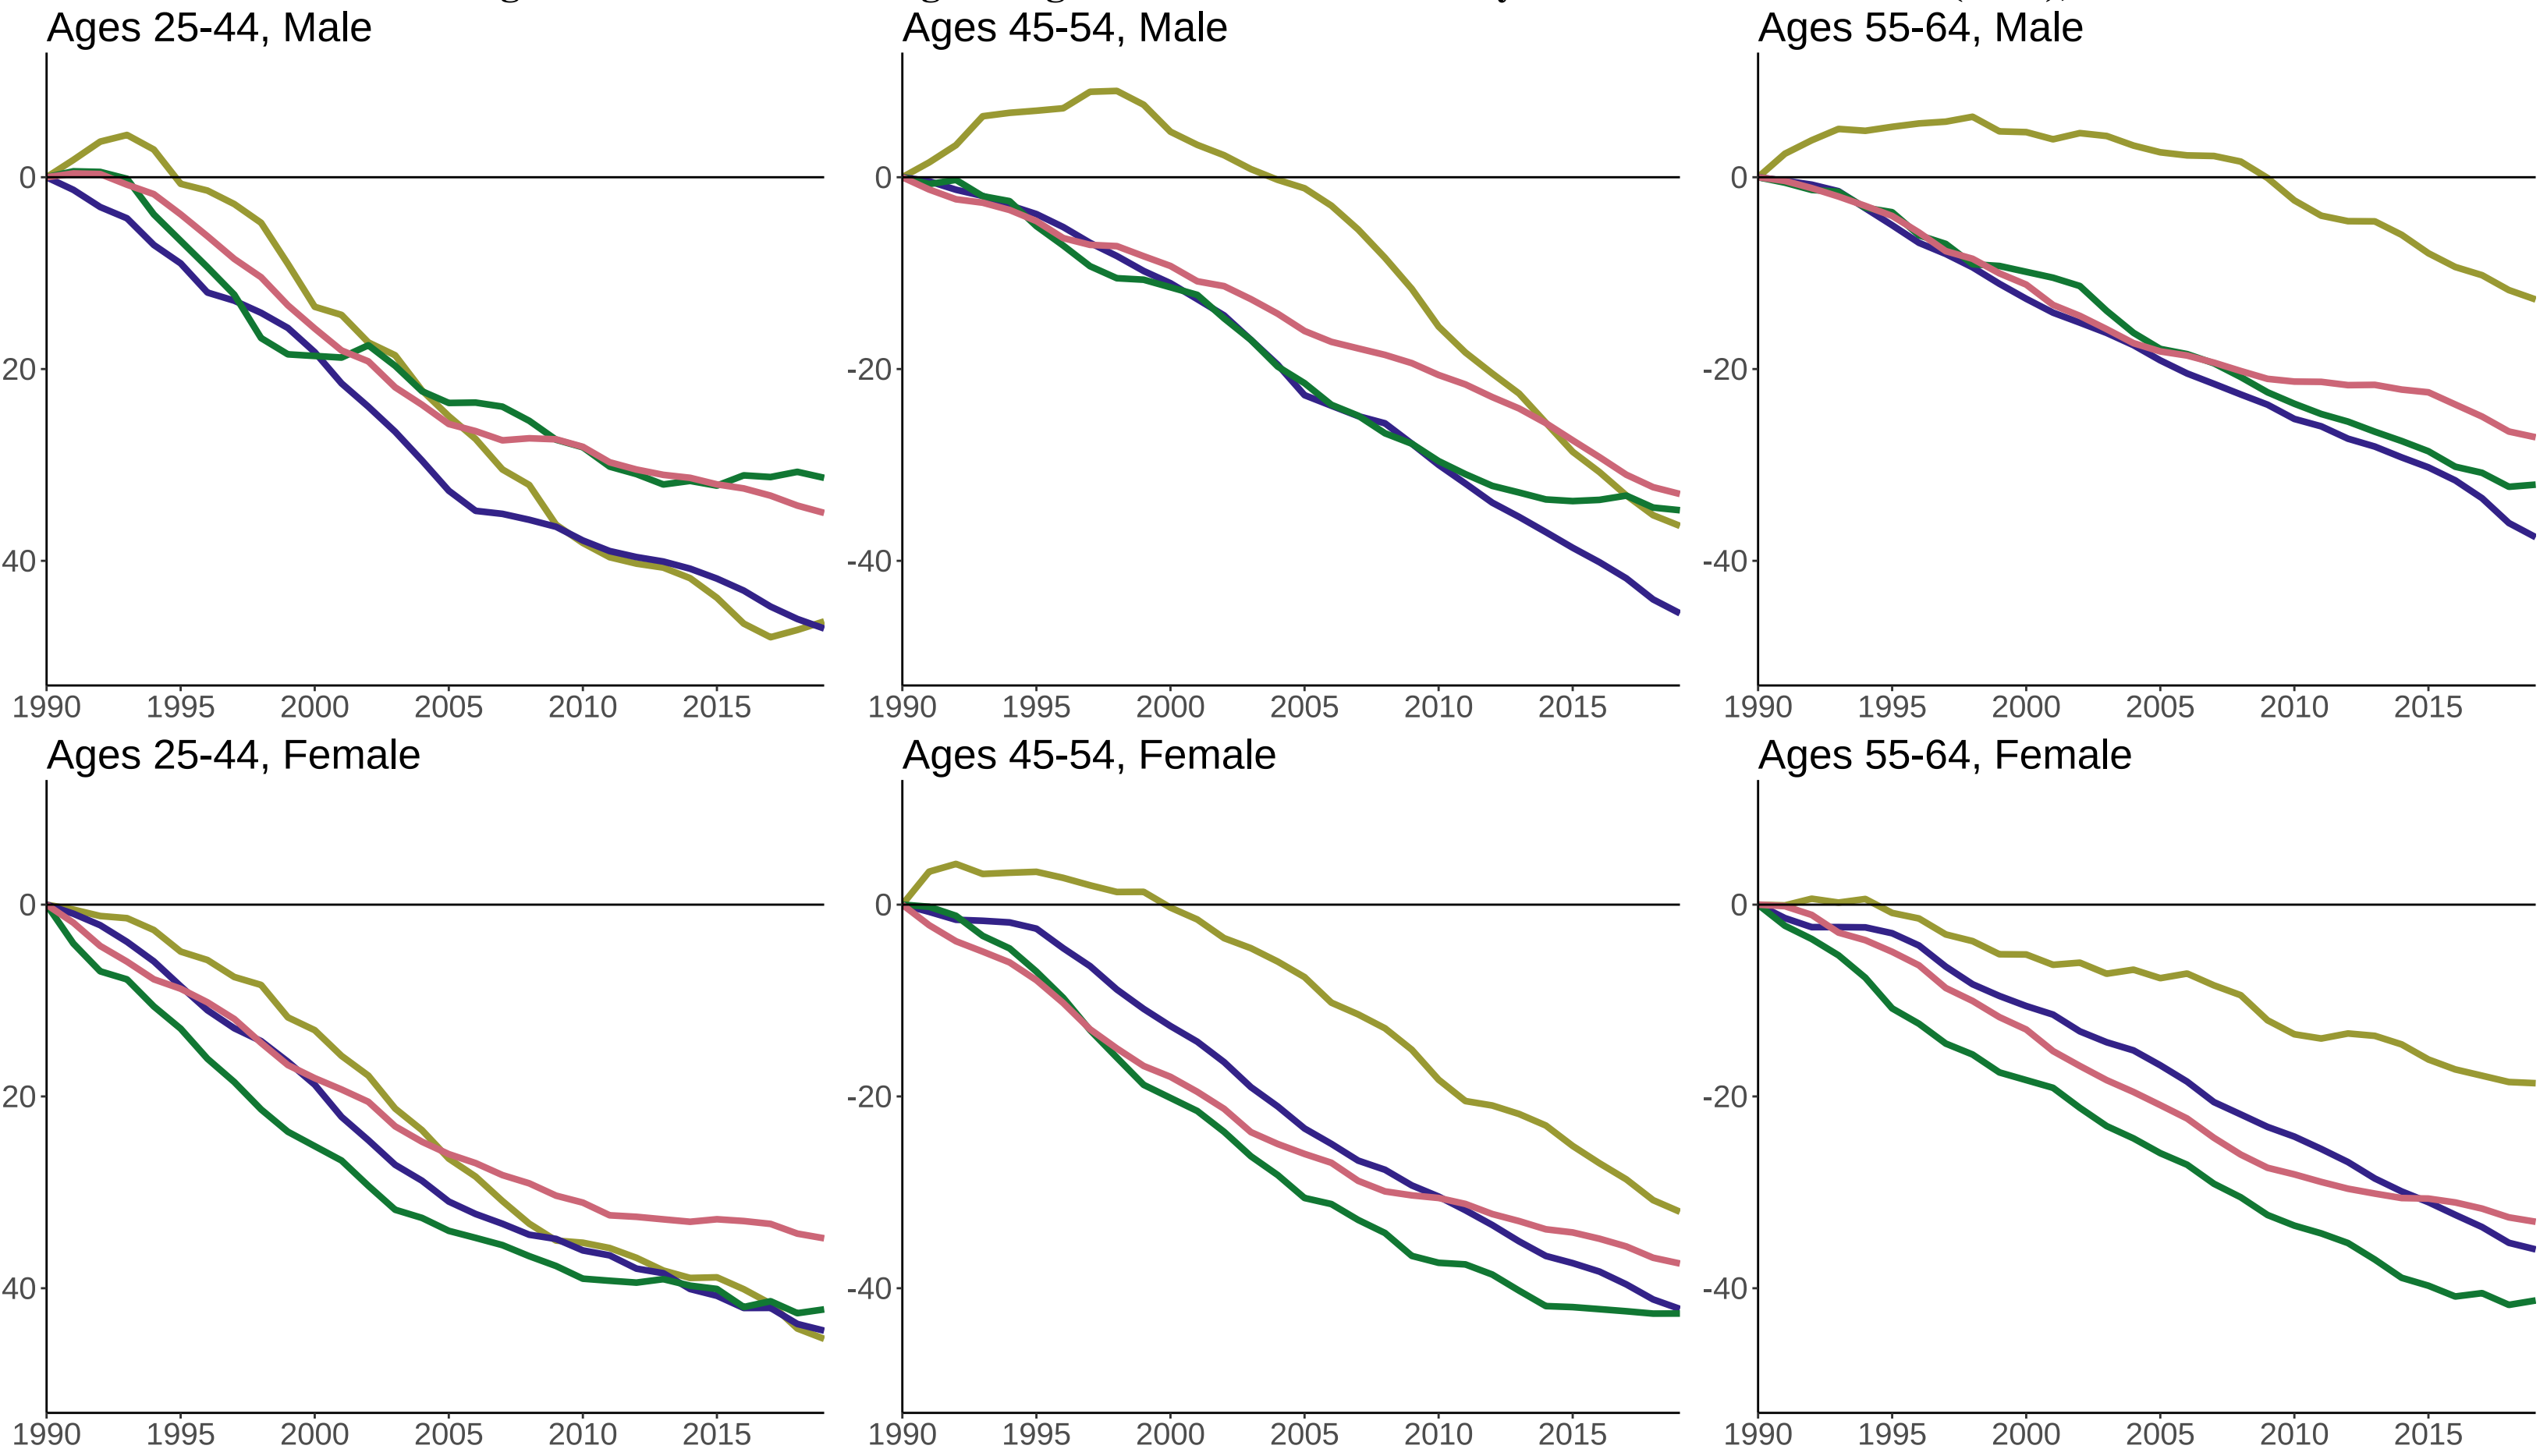

**Figure S22. Percent Change in Age-Standardized Mortality from the Baseline Year (1990), Nervous System Diseases**

Percent Change in Deaths per 100 000

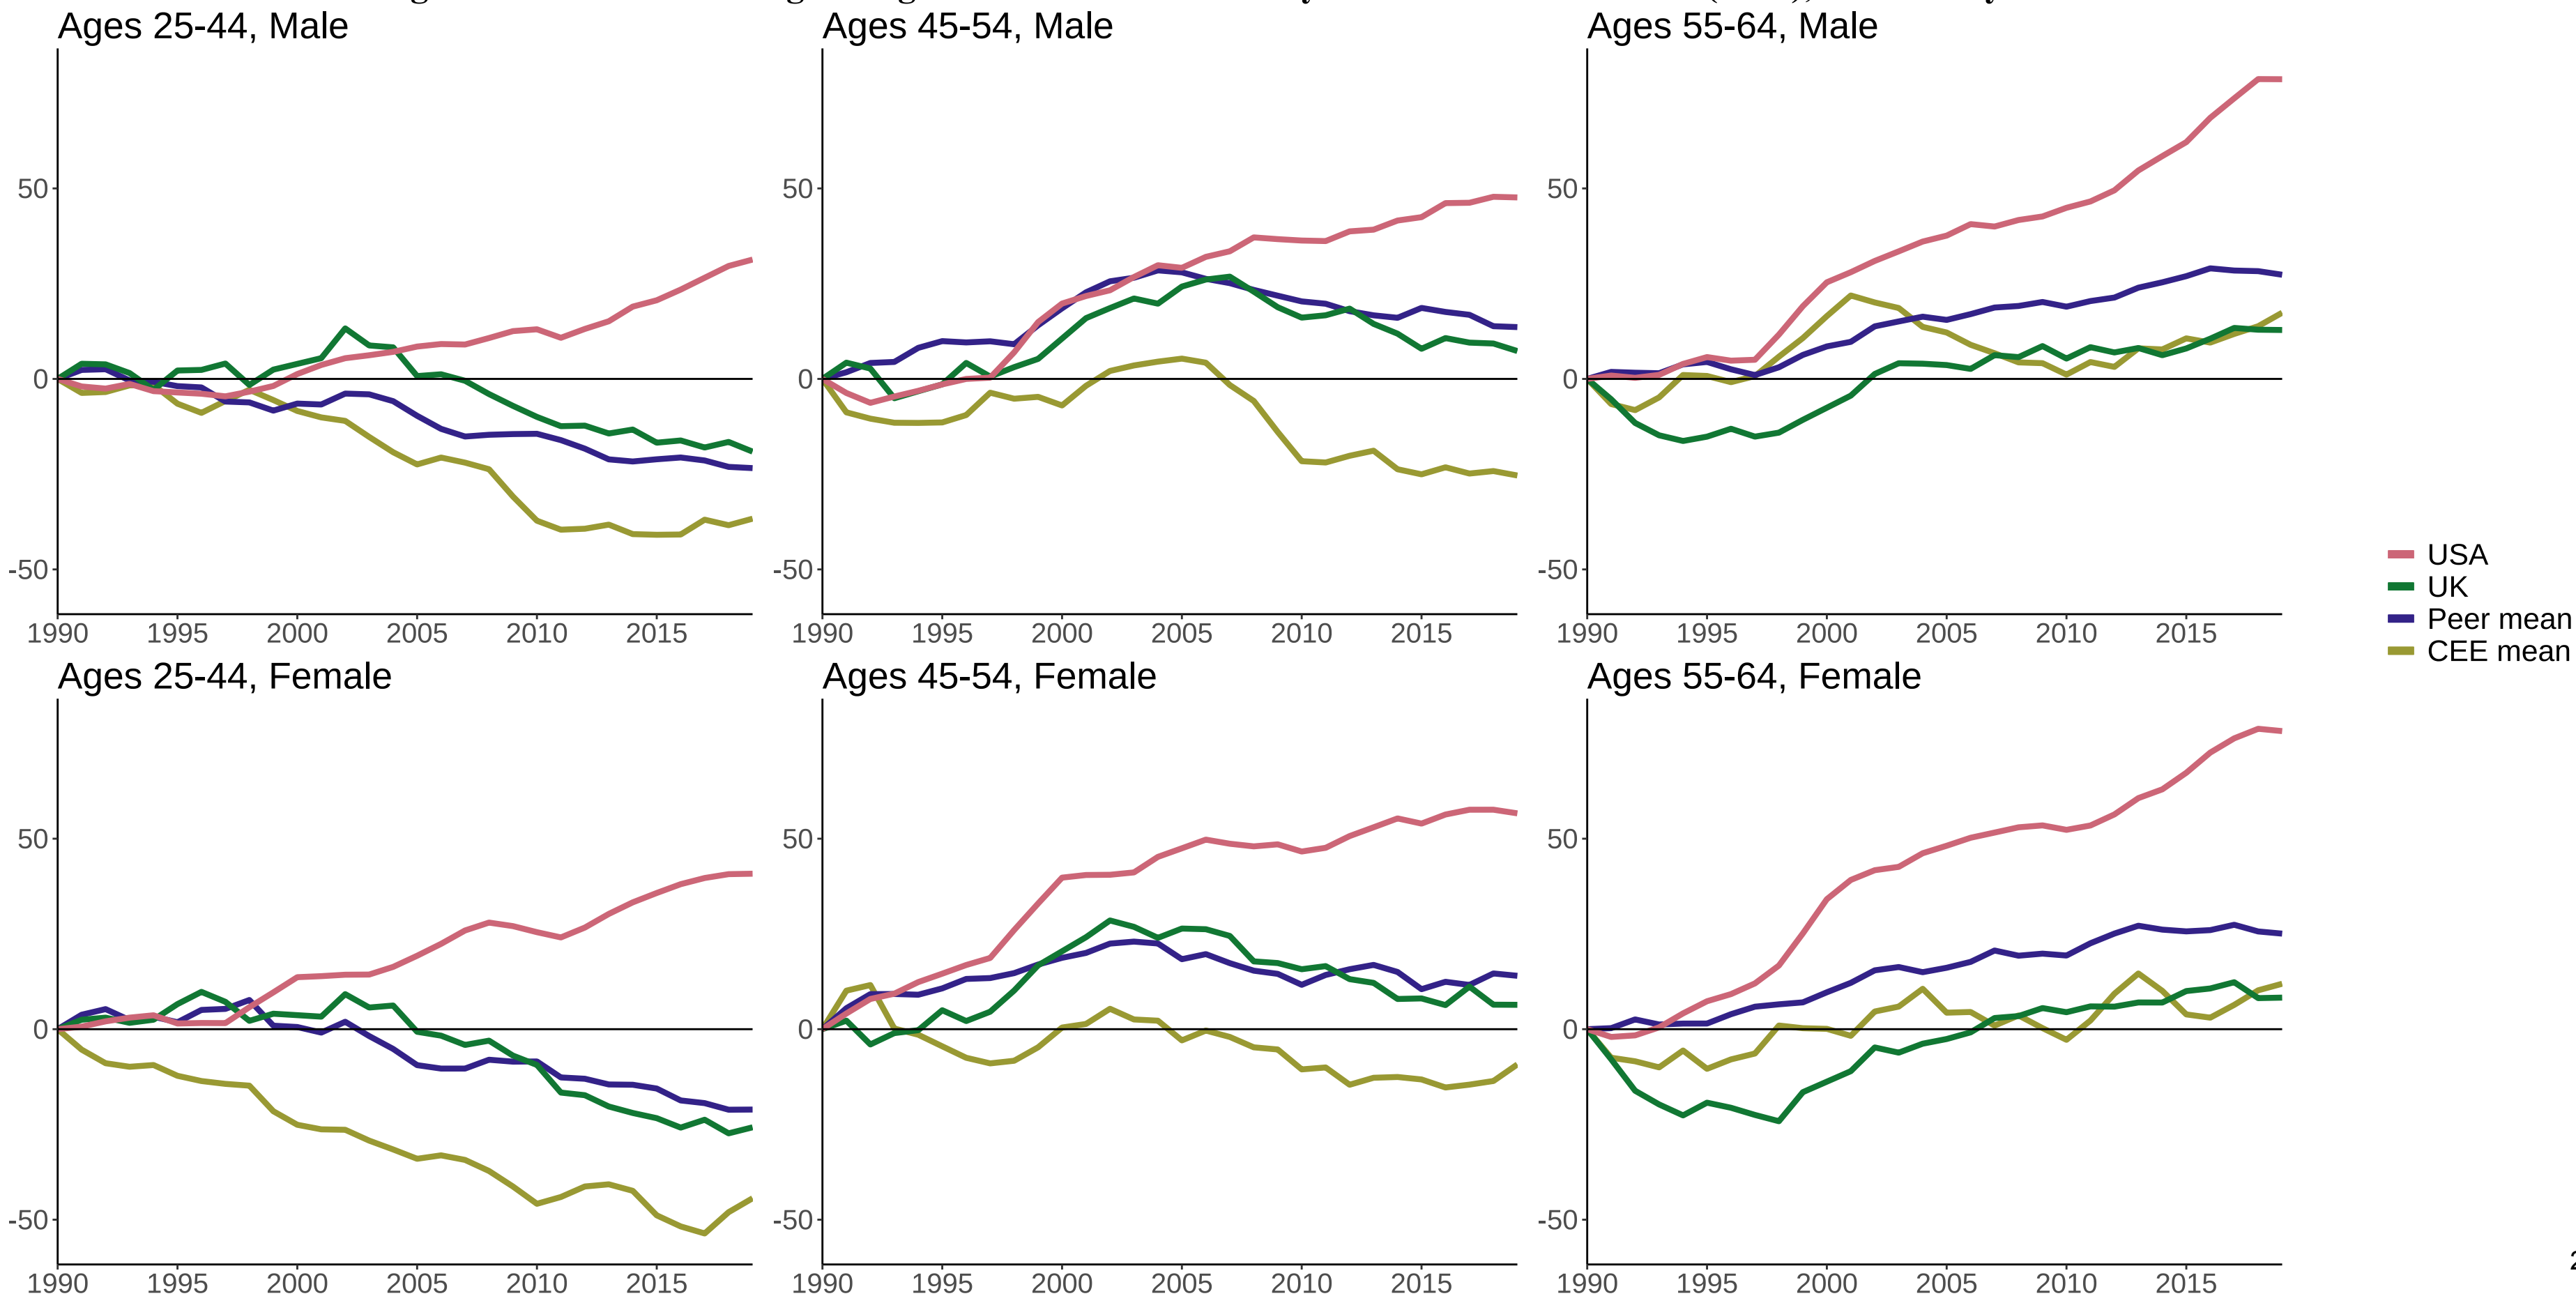

**Figure S23. Percent Change in Age-Standardized Mortality from the Baseline Year (1990), Metabolic Diseases**

Percent Change in Deaths per 100 000

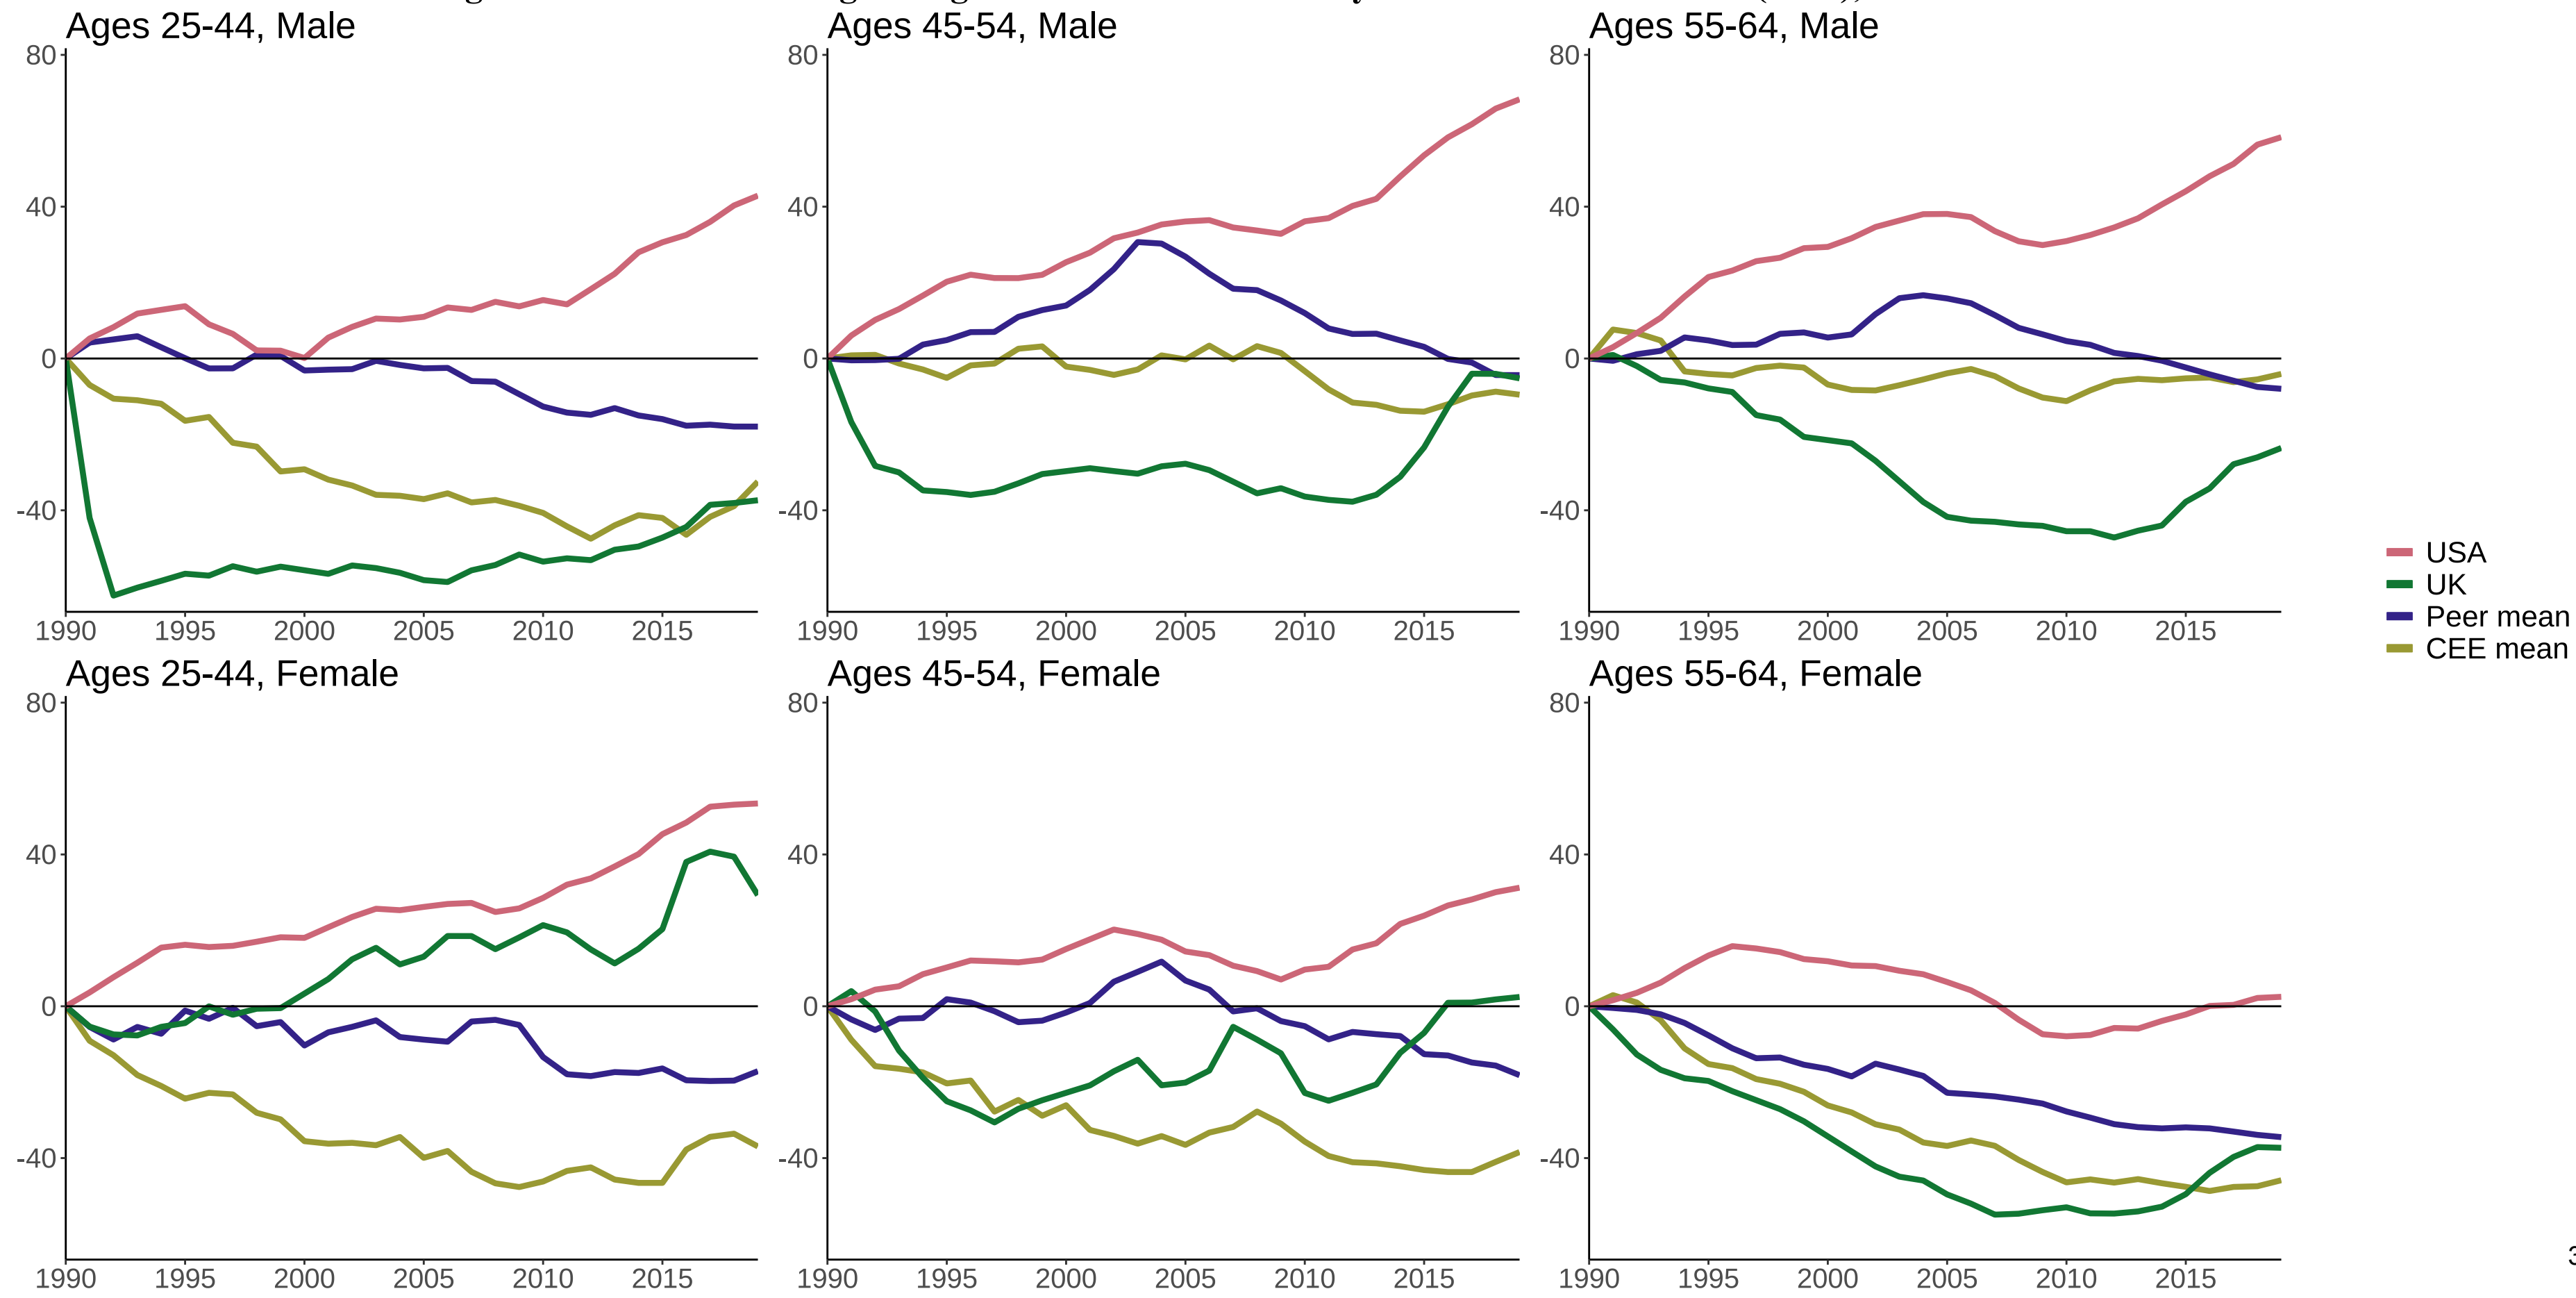

**Figure S24. Percent Change in Age-Standardized Mortality from the Baseline Year (1990), Cardiovascular Disease**

Percent Change in Deaths per 100 000

Ages 25-44, Male

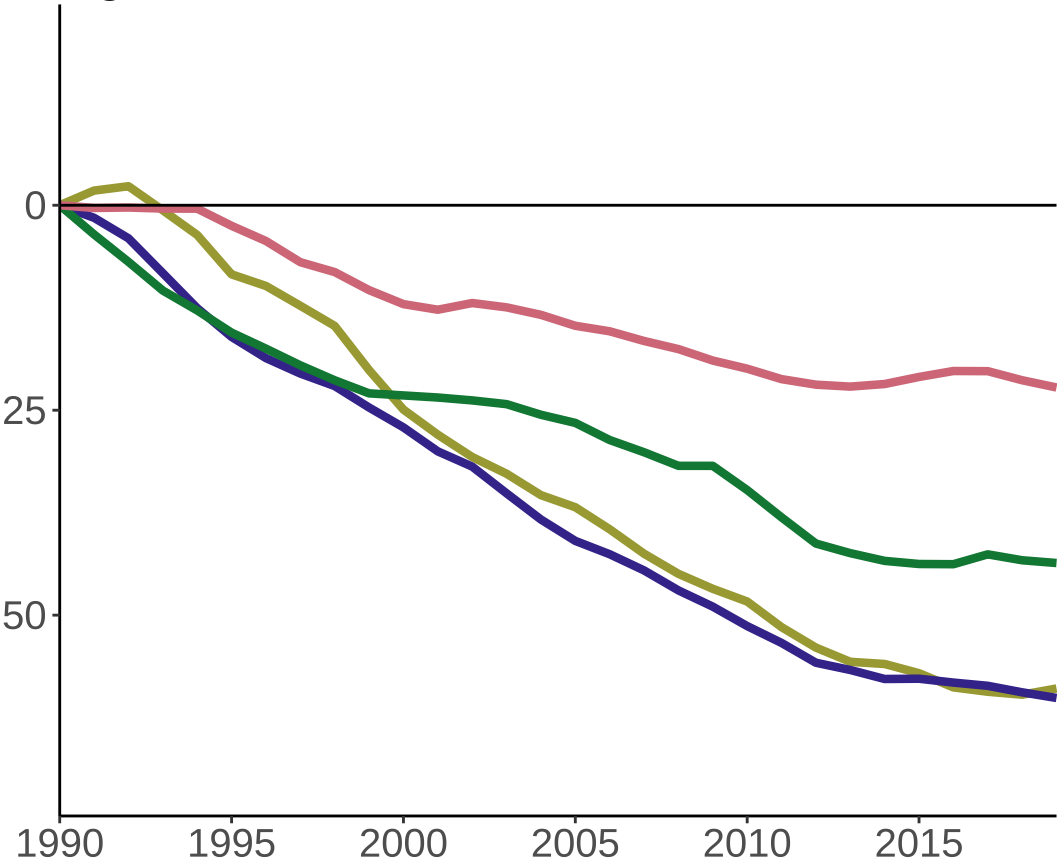

Ages 45-54, Male

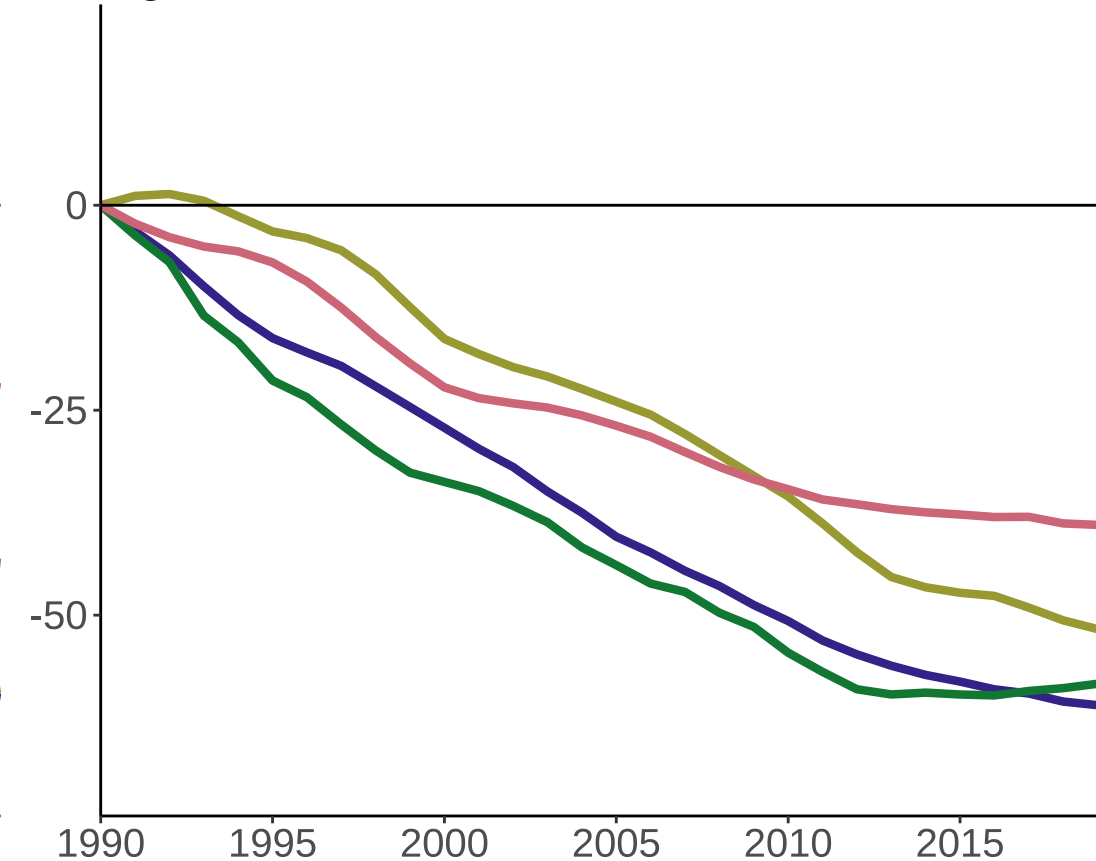

Ages 55-64, Male

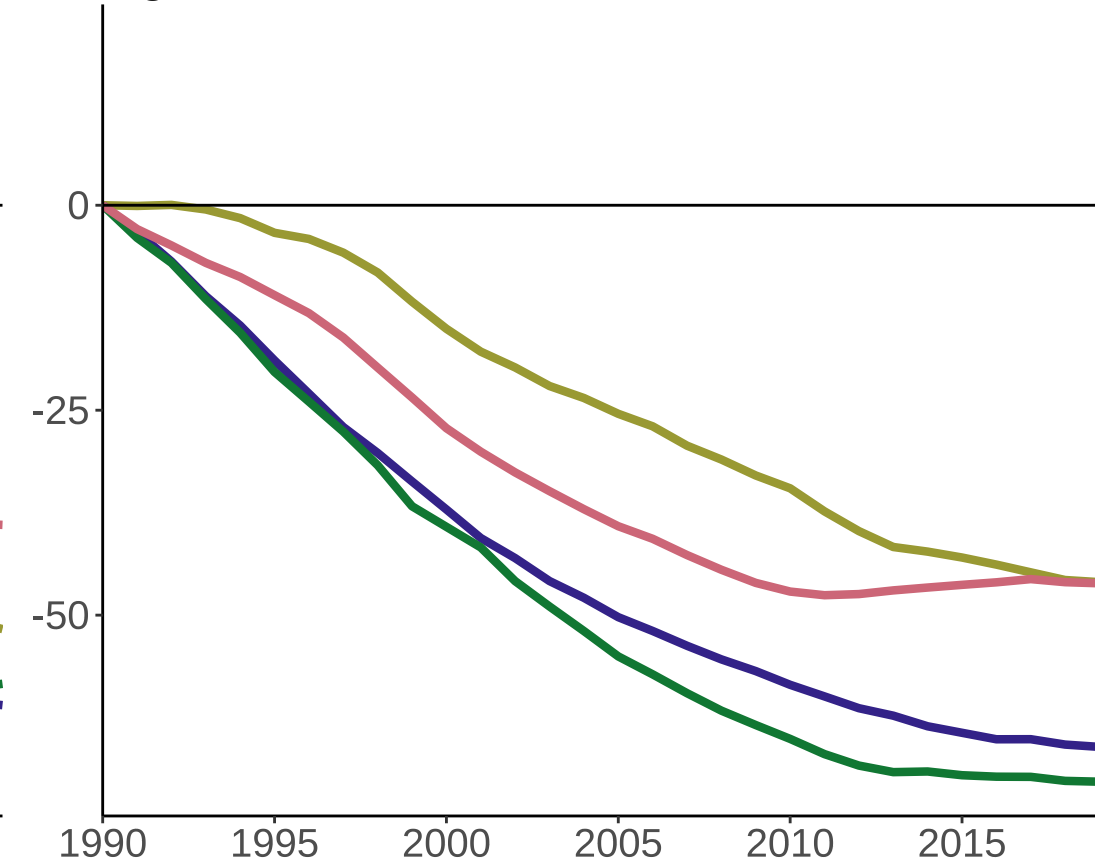

USA  
UK  
Peer mean  
CEE mean

Ages 25-44, Female

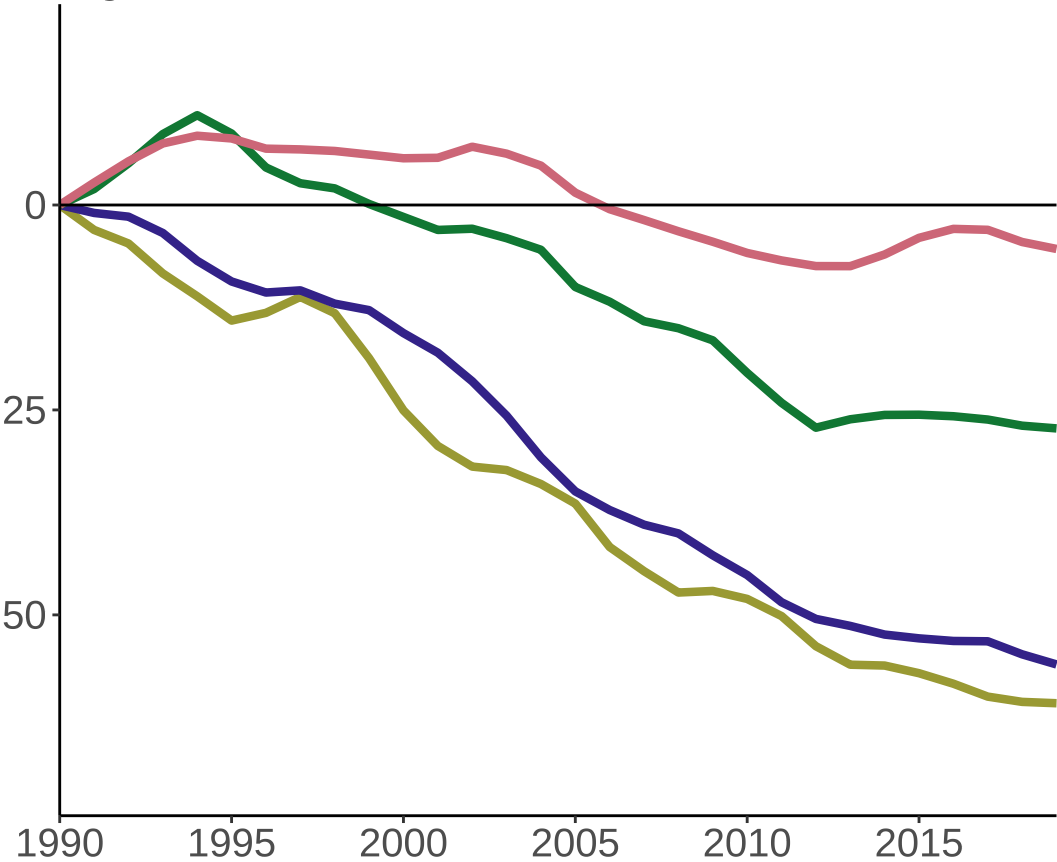

Ages 45-54, Female

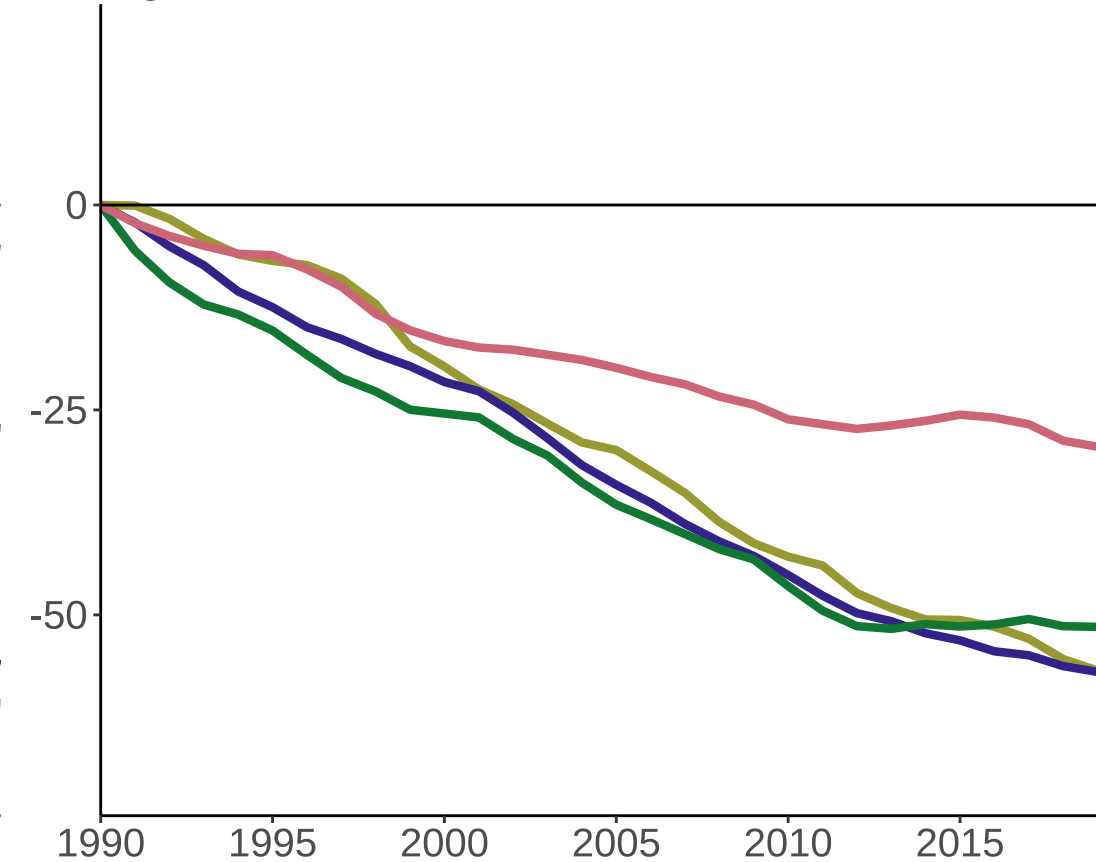

Ages 55-64, Female

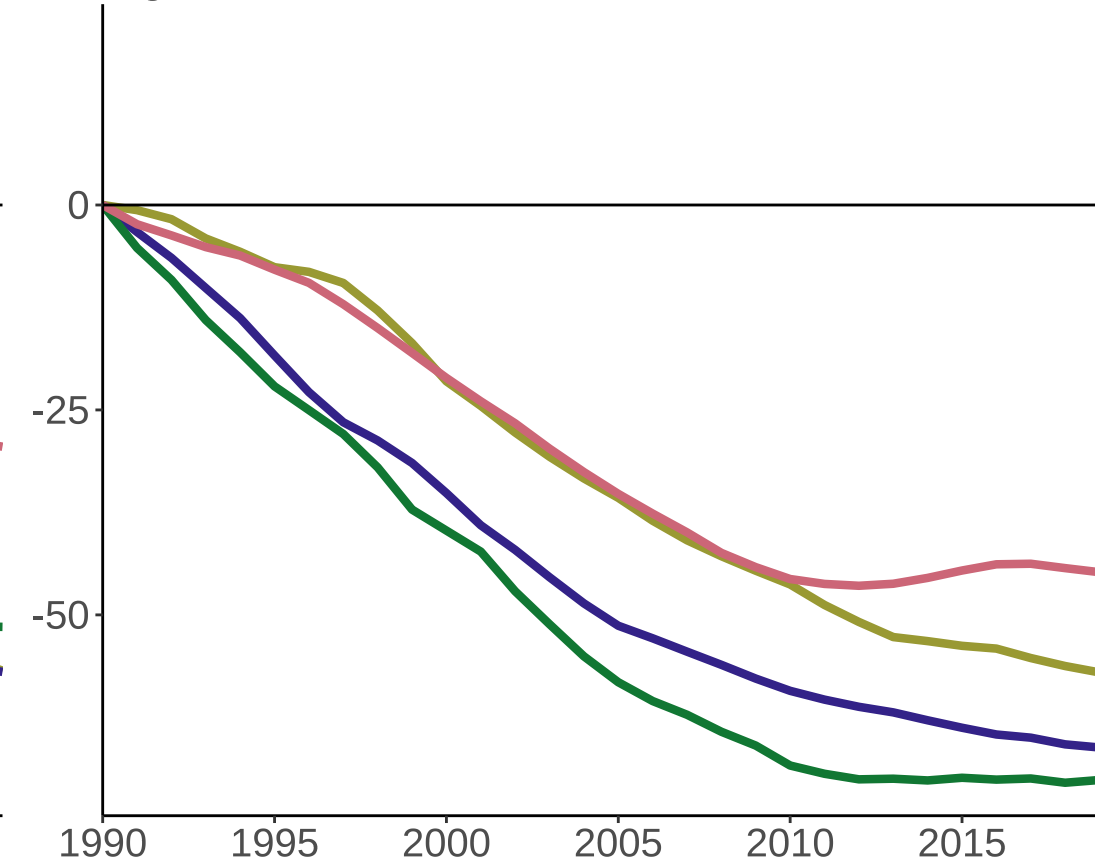

**Figure S25. Percent Change in Age-Standardized Mortality from the Baseline Year (1990), Suicide**

Percent Change in Deaths per 100 000

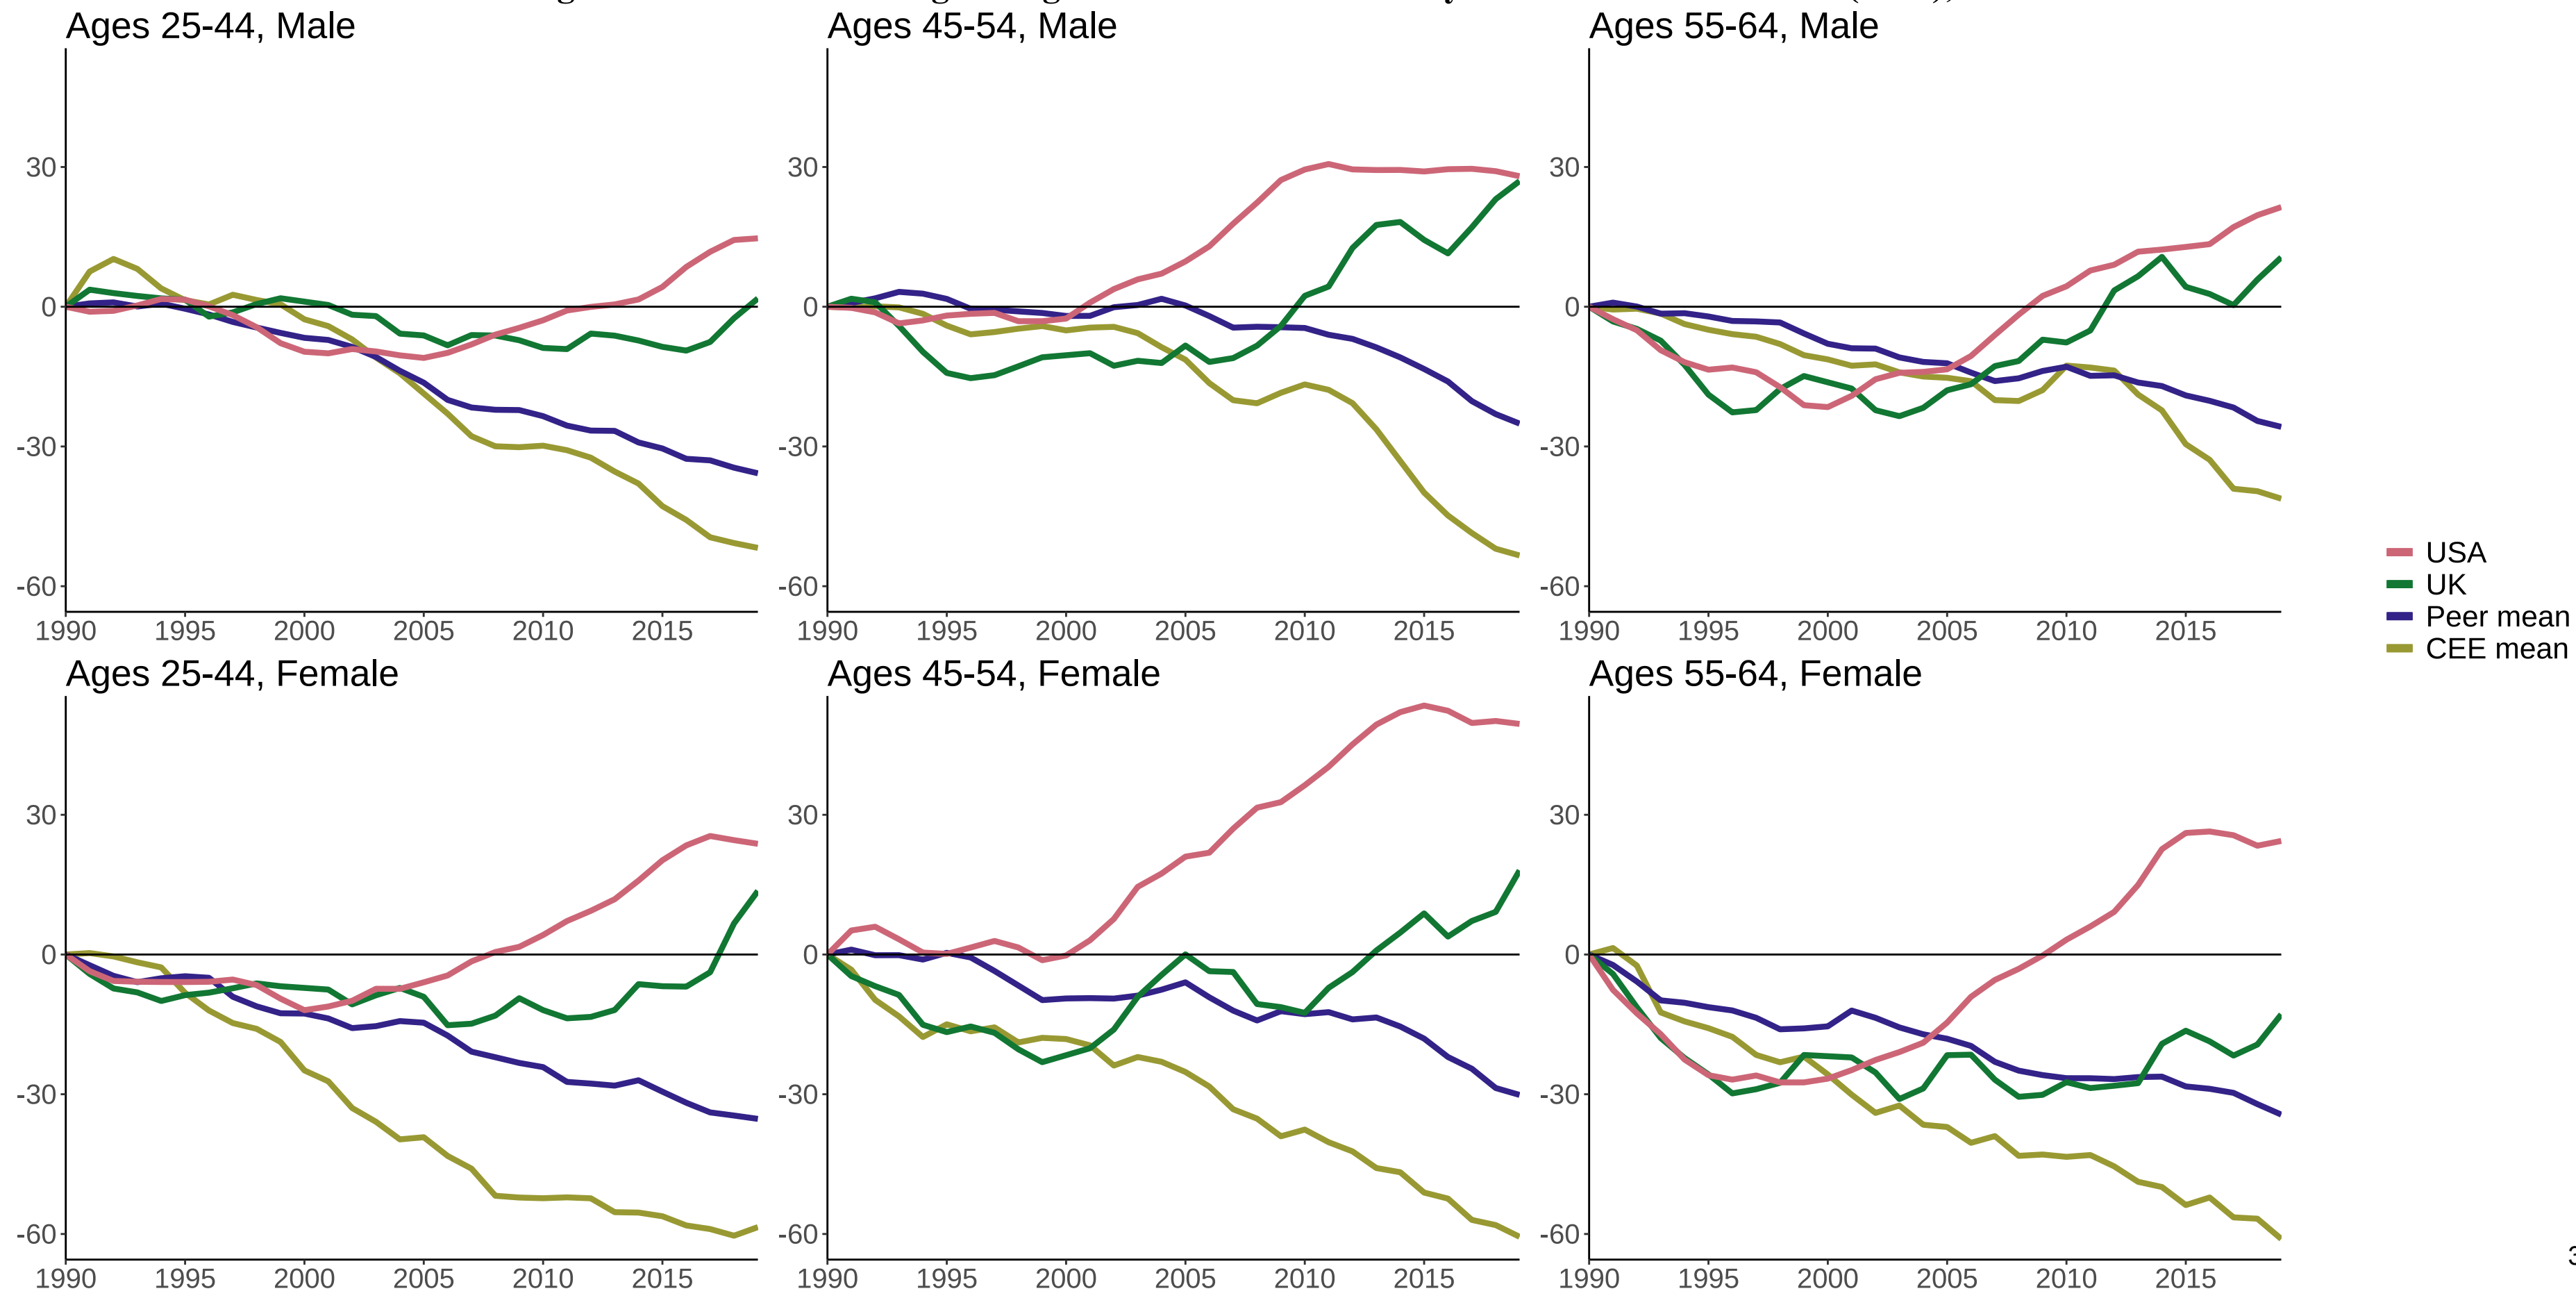

**Figure S26. Percent Change in Age-Standardized Mortality from the Baseline Year (1990), Homicide**

Percent Change in Deaths per 100 000

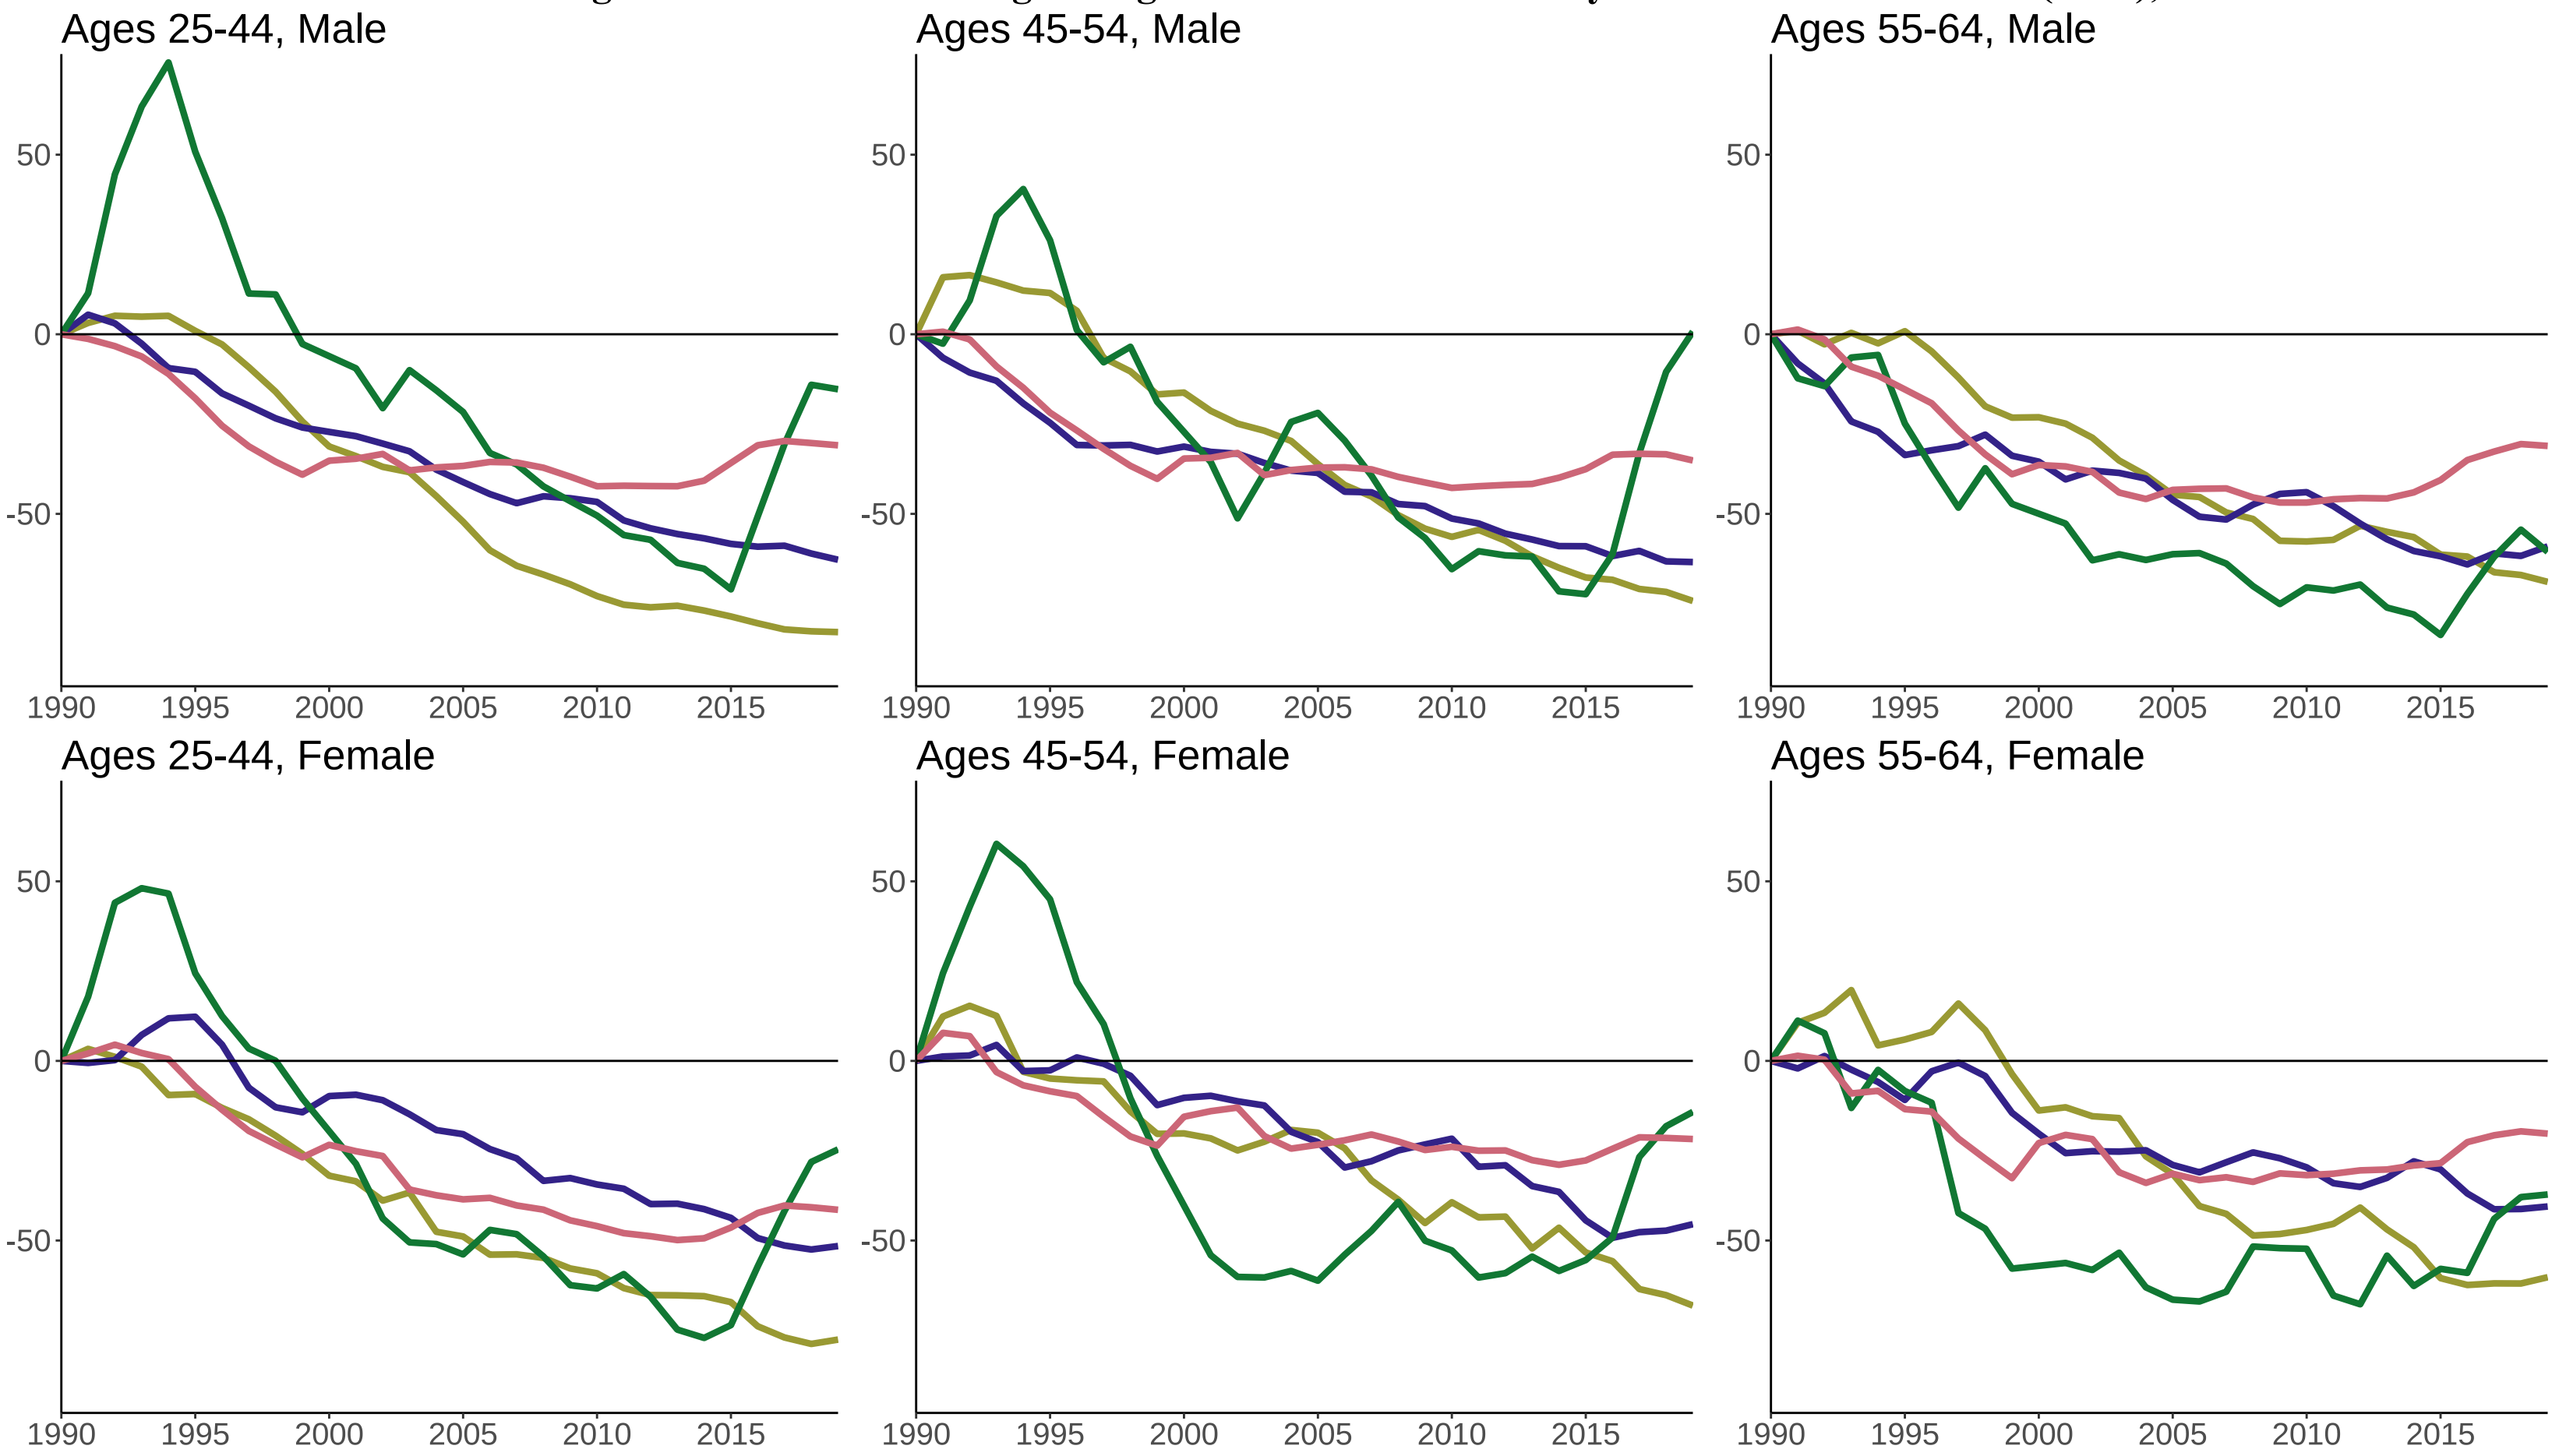

**Figure S27. Percent Change in Age-Standardized Mortality from the Baseline Year (1990), Transport Accidents**

Percent Change in Deaths per 100 000

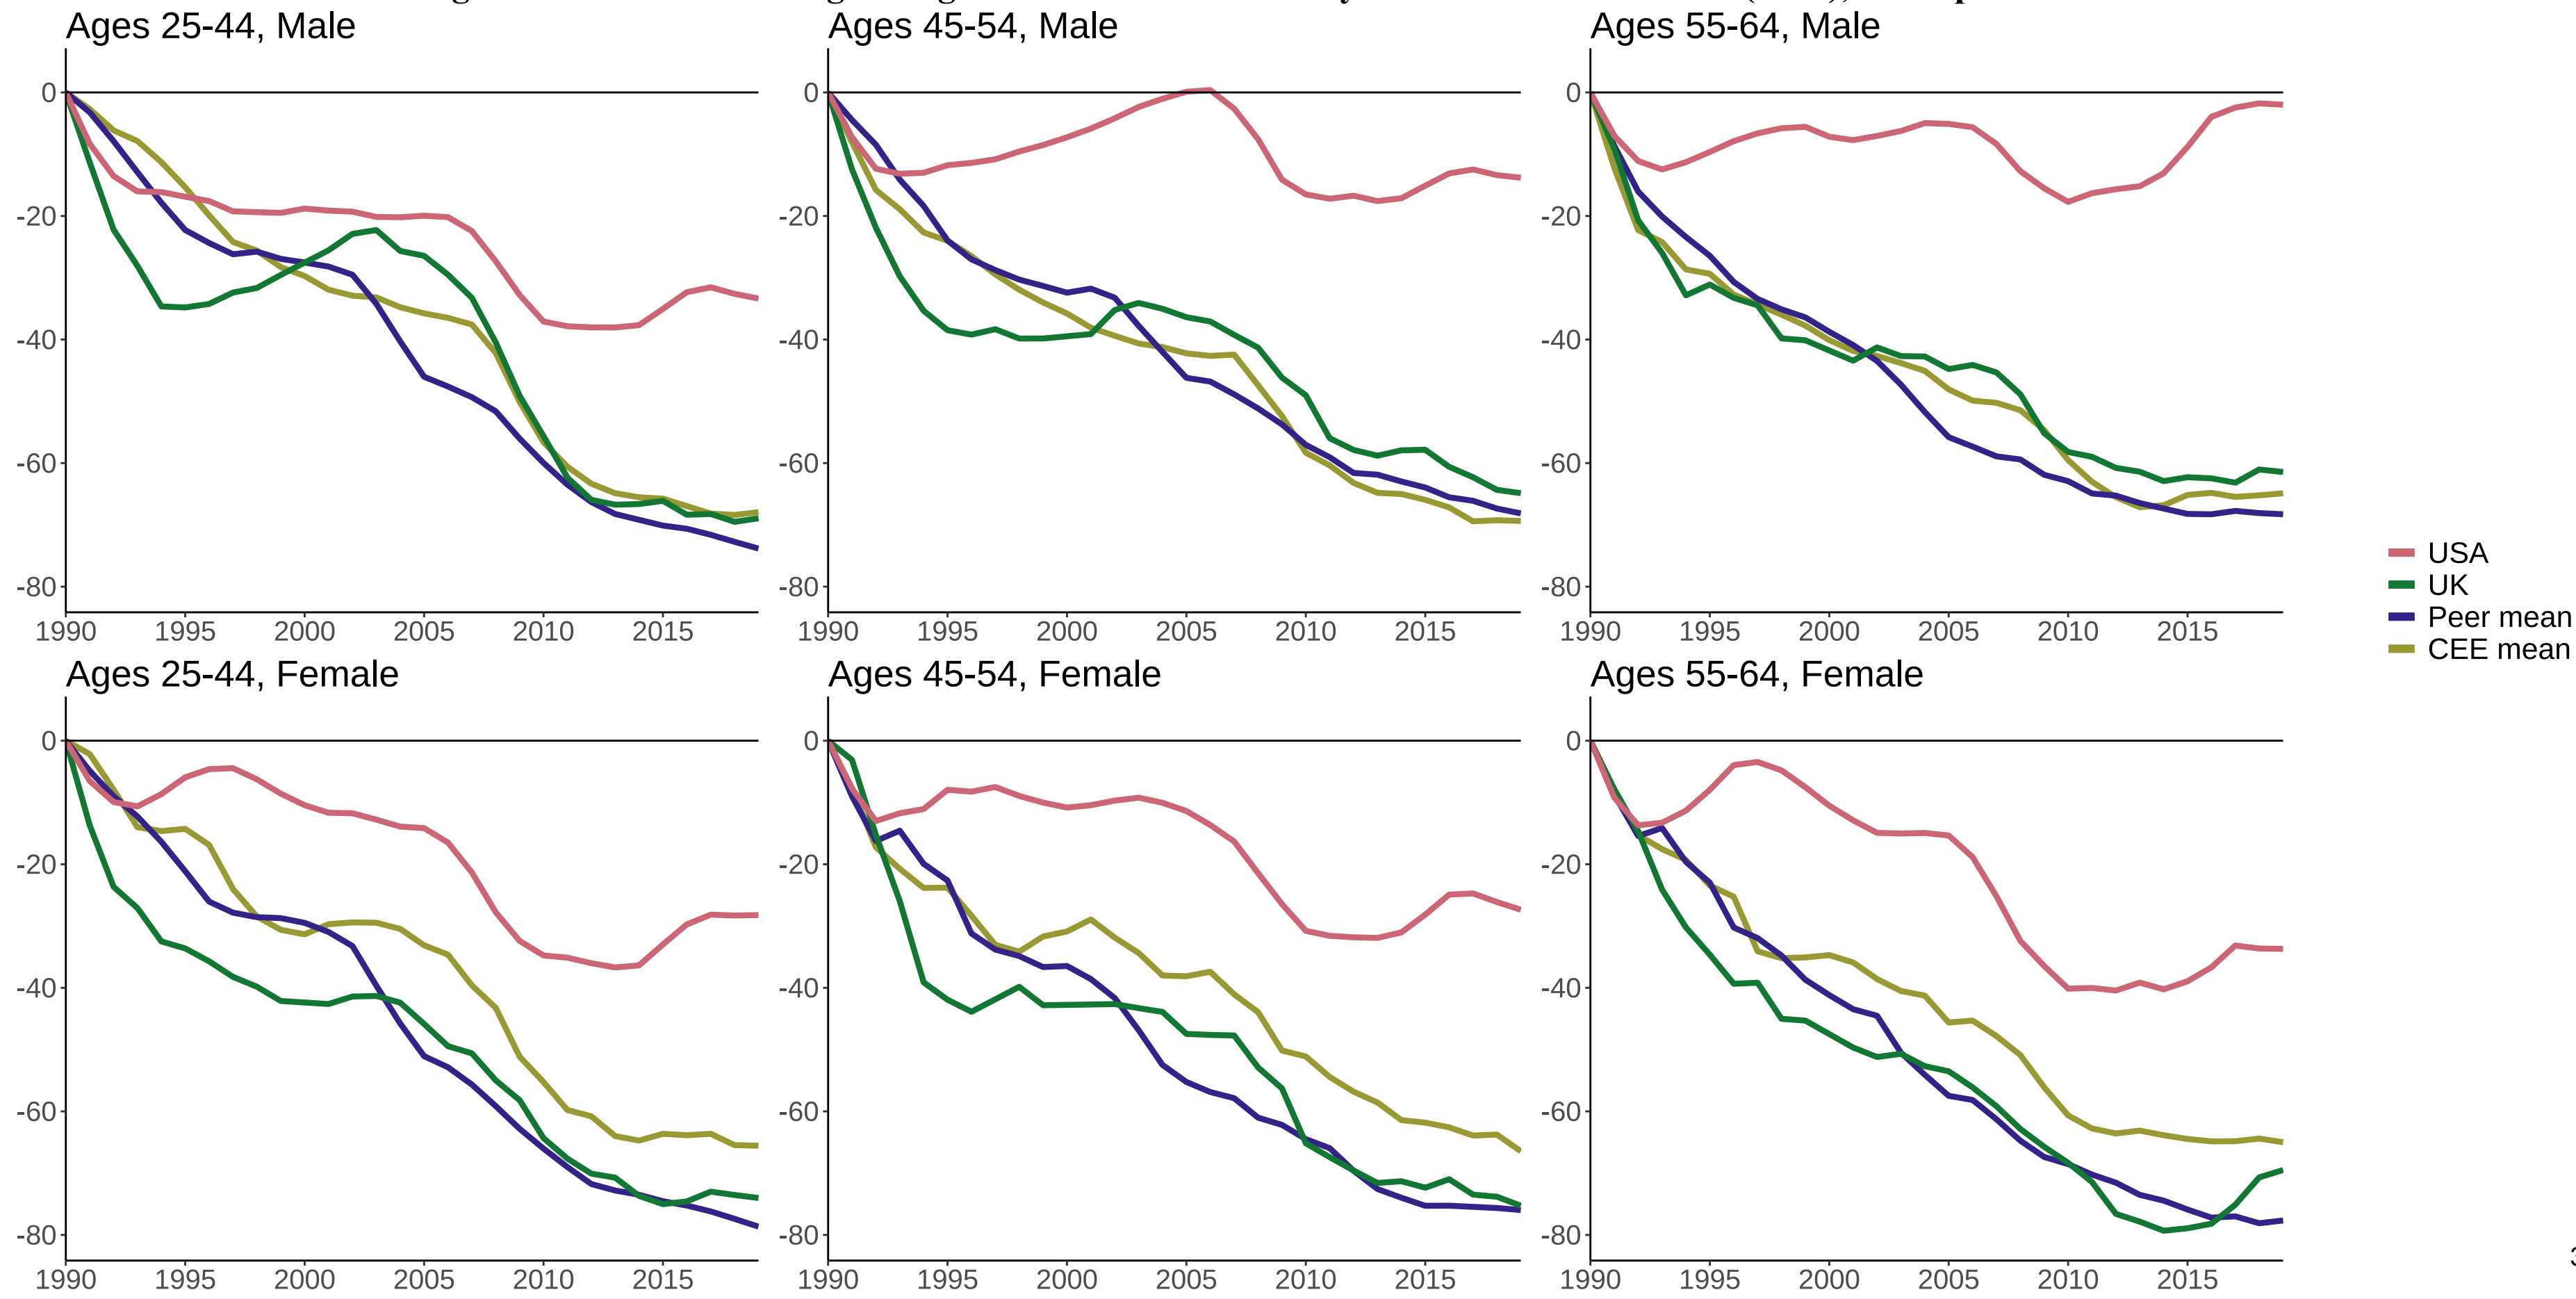

**Figure S28. Percent Change in Age-Standardized Mortality from the Baseline Year (1990), Other External Causes**

Percent Change in Deaths per 100 000

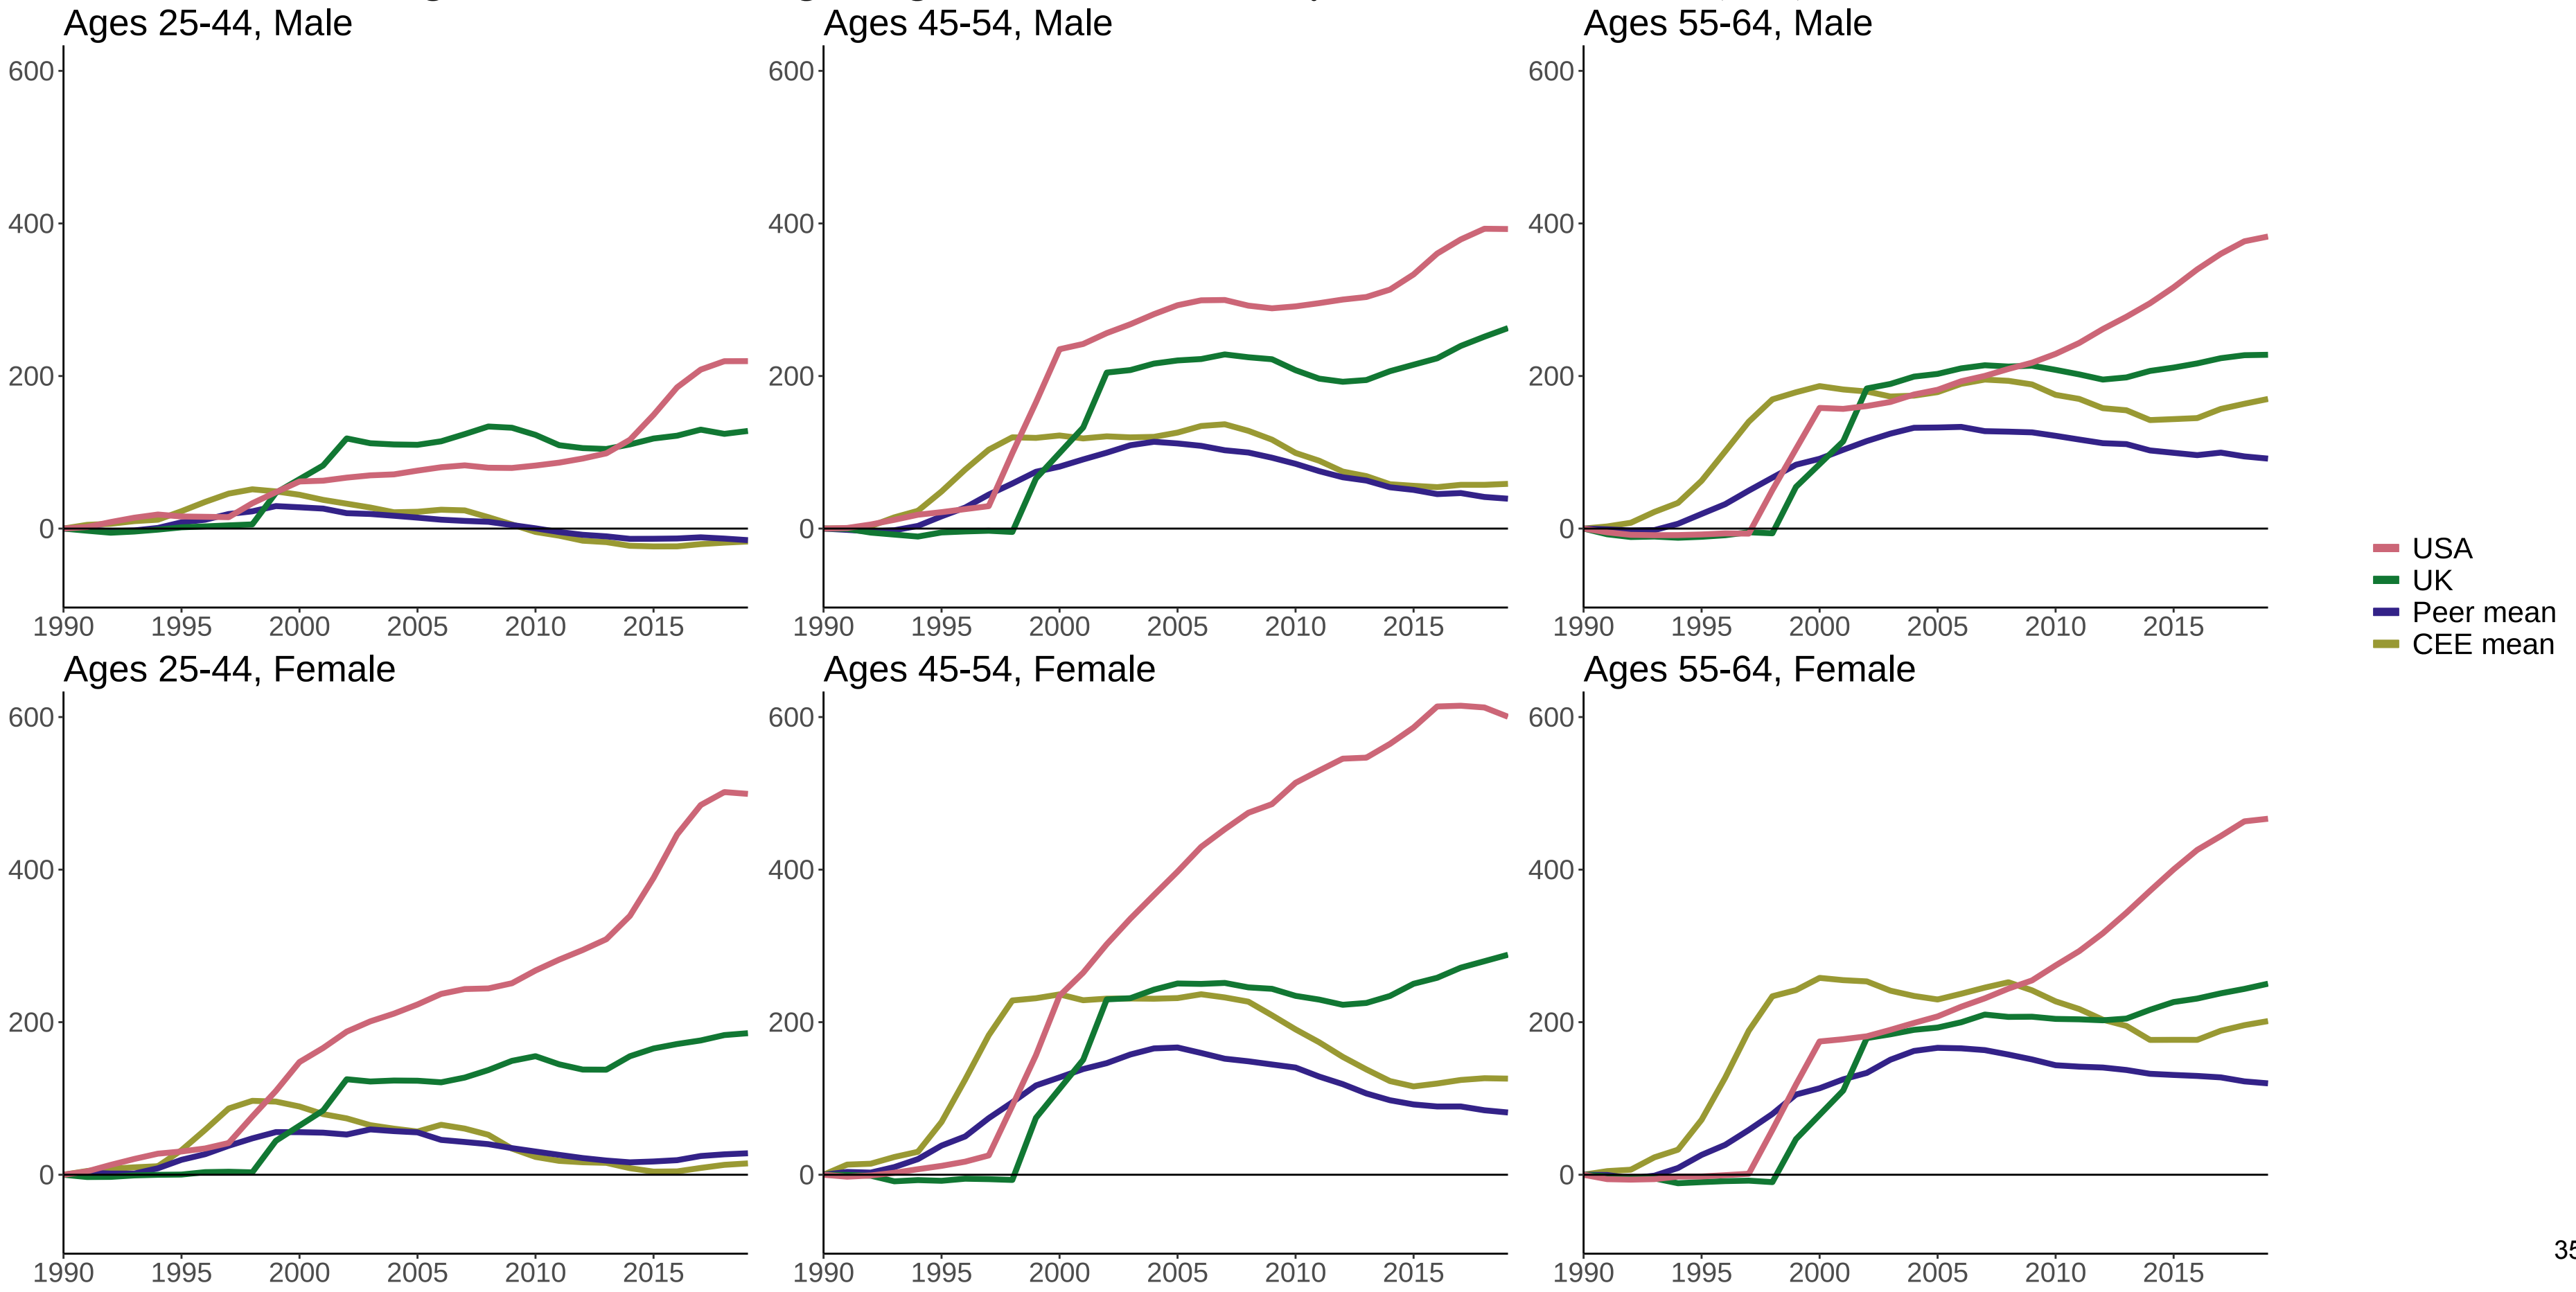

**Figure S29. Percent Change in Age-Standardized Mortality from the Baseline Year (1990), All Other Causes**

Percent Change in Deaths per 100 000

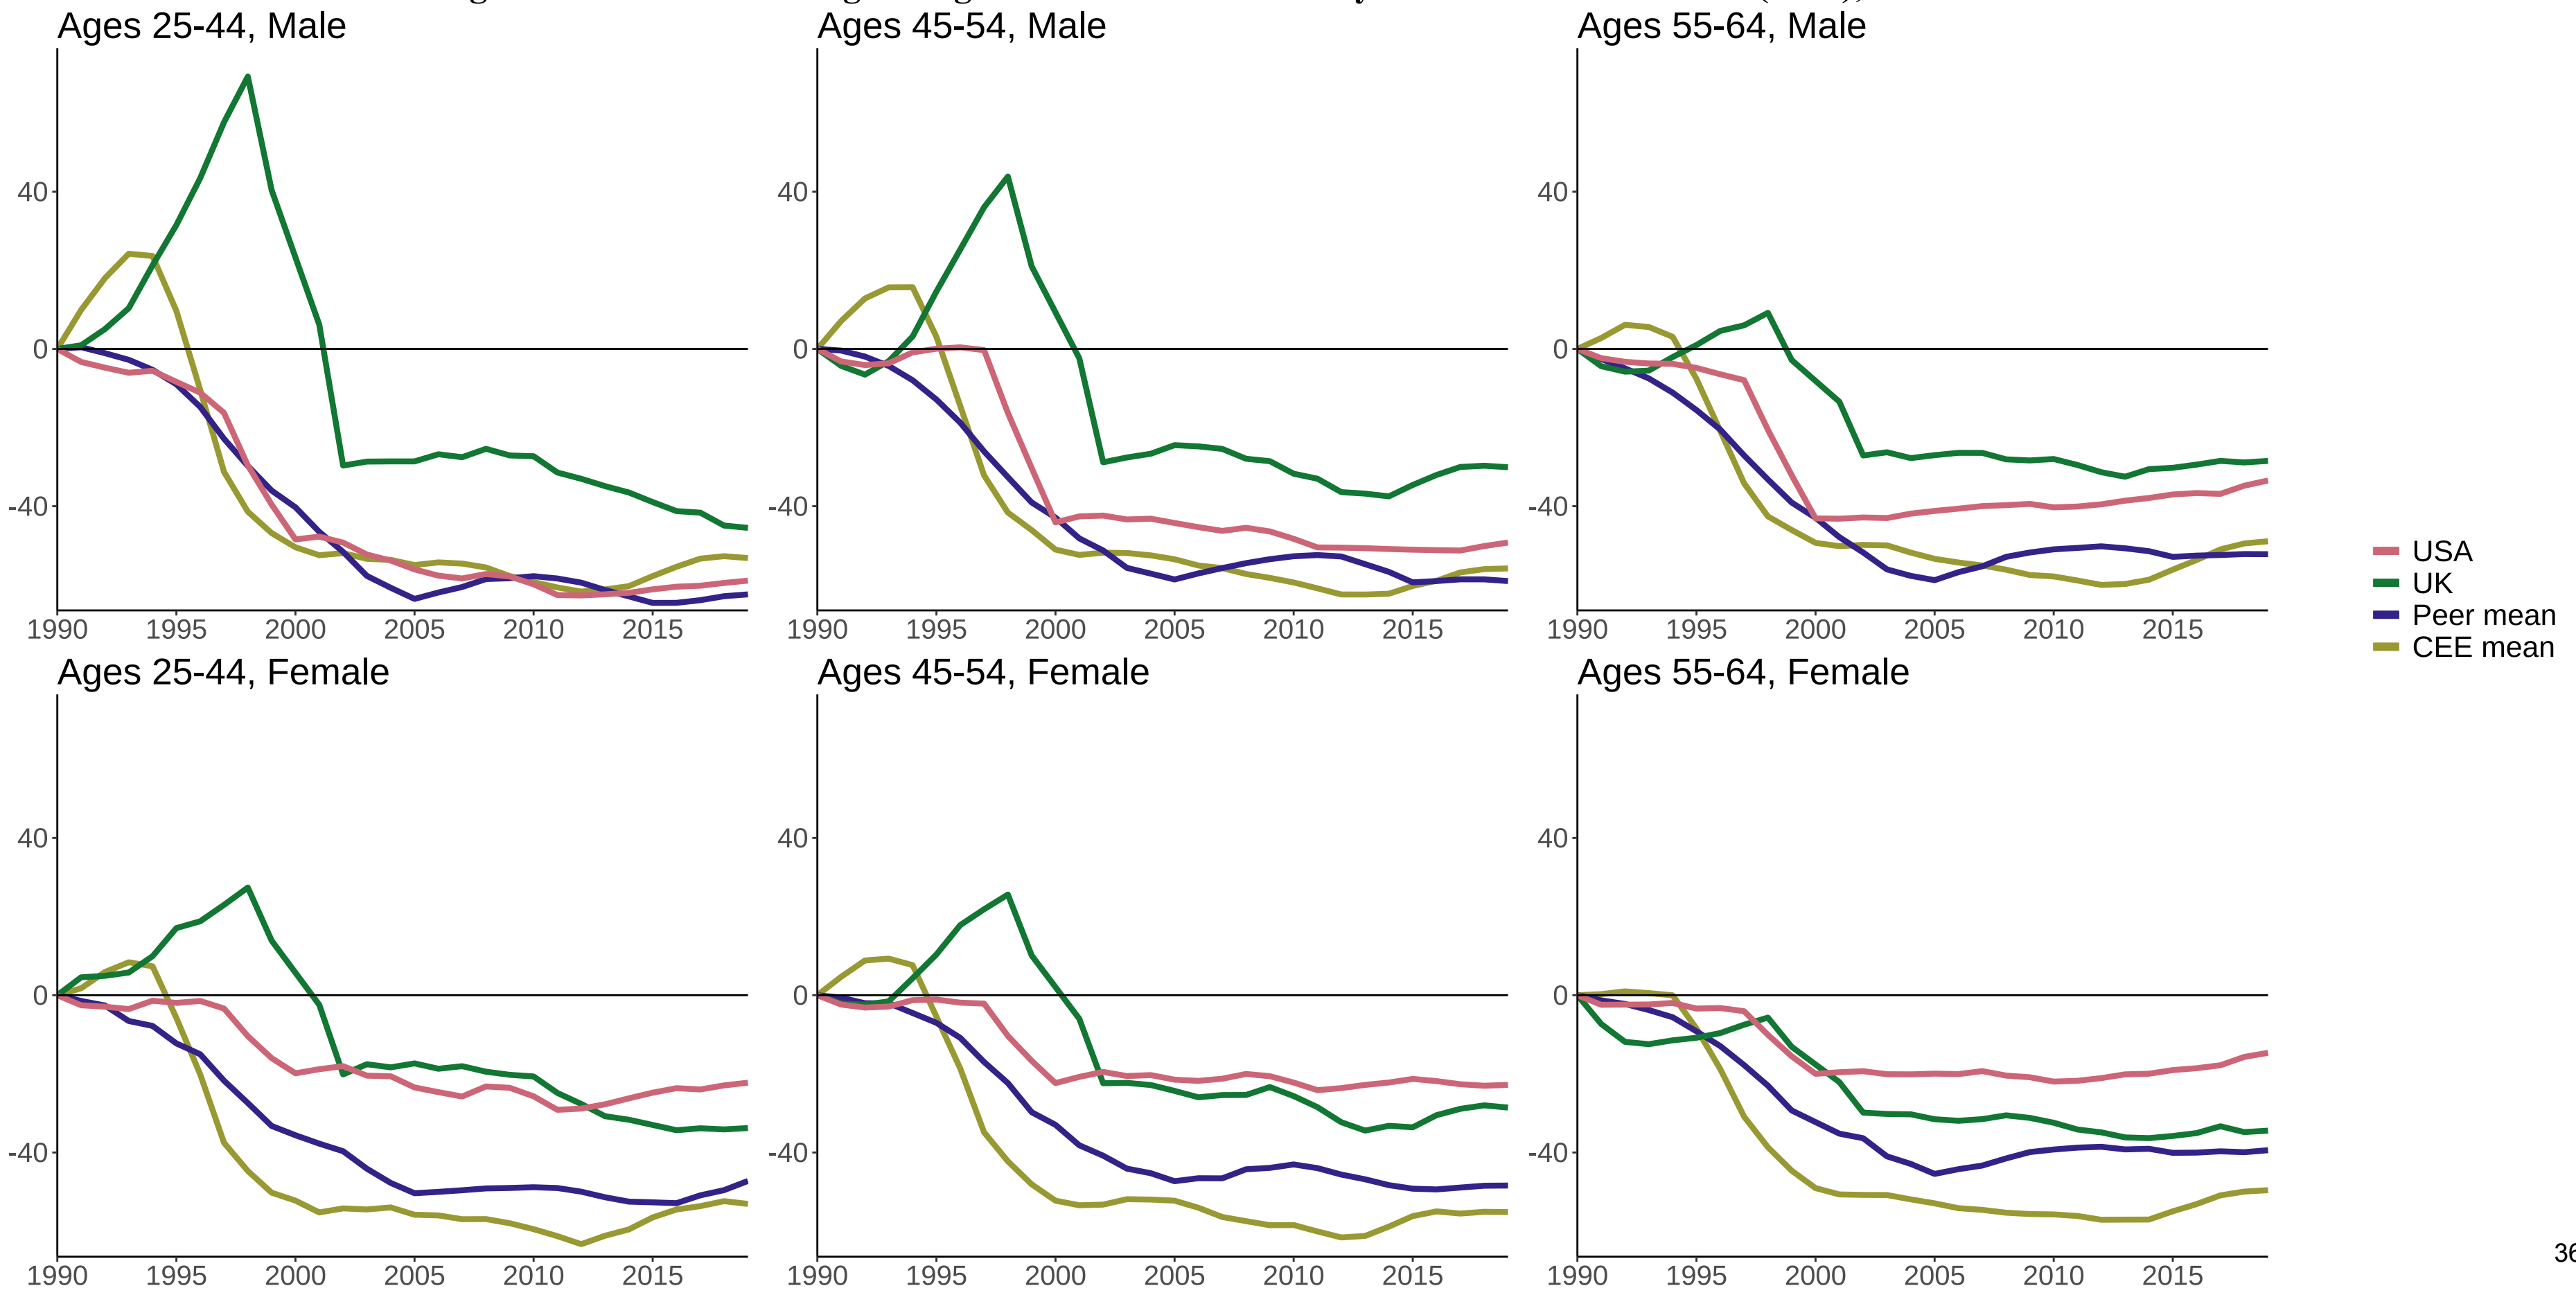

**Figure S30. Percent Change in Age-Standardized Mortality from the Baseline Year (1990), All Causes**

Percent Change in Deaths per 100 000

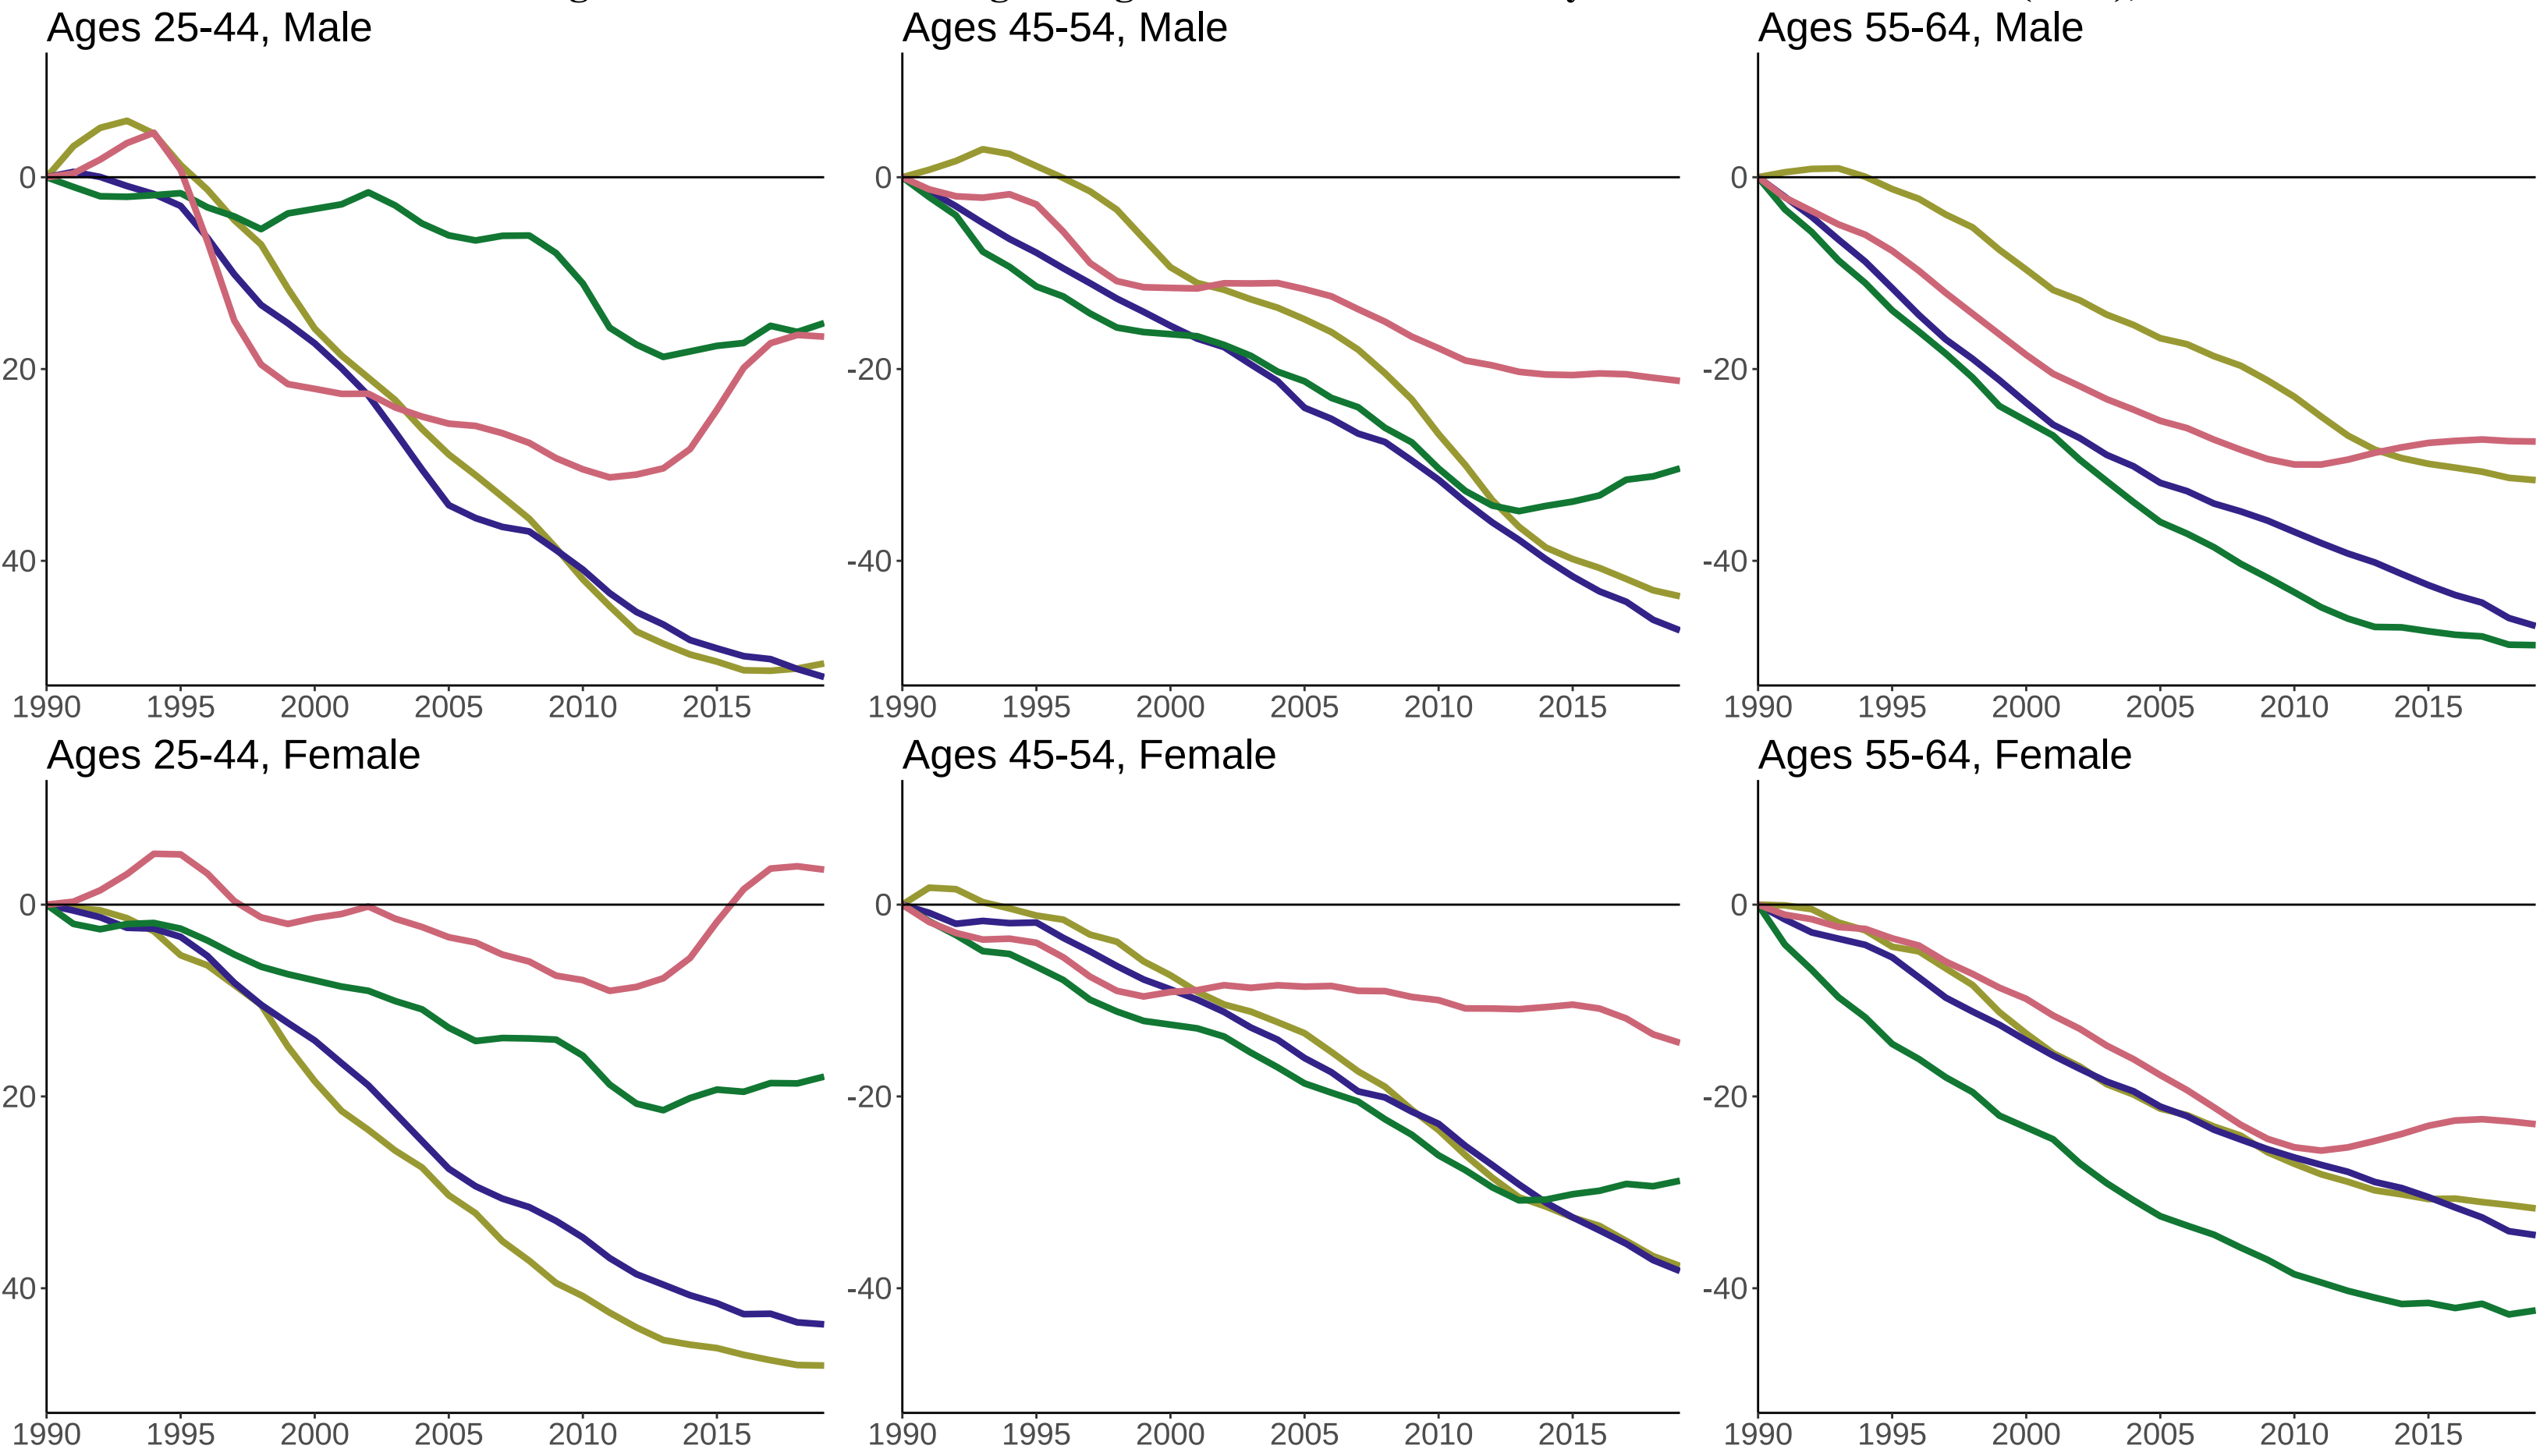

- USA
- UK
- Peer mean
- CEE mean

**Figure S31. Percent Change in Age-Standardized Mortality from the Baseline Year (2000), Drug-Related Causes**

**Percent Change in Deaths per 100,000**

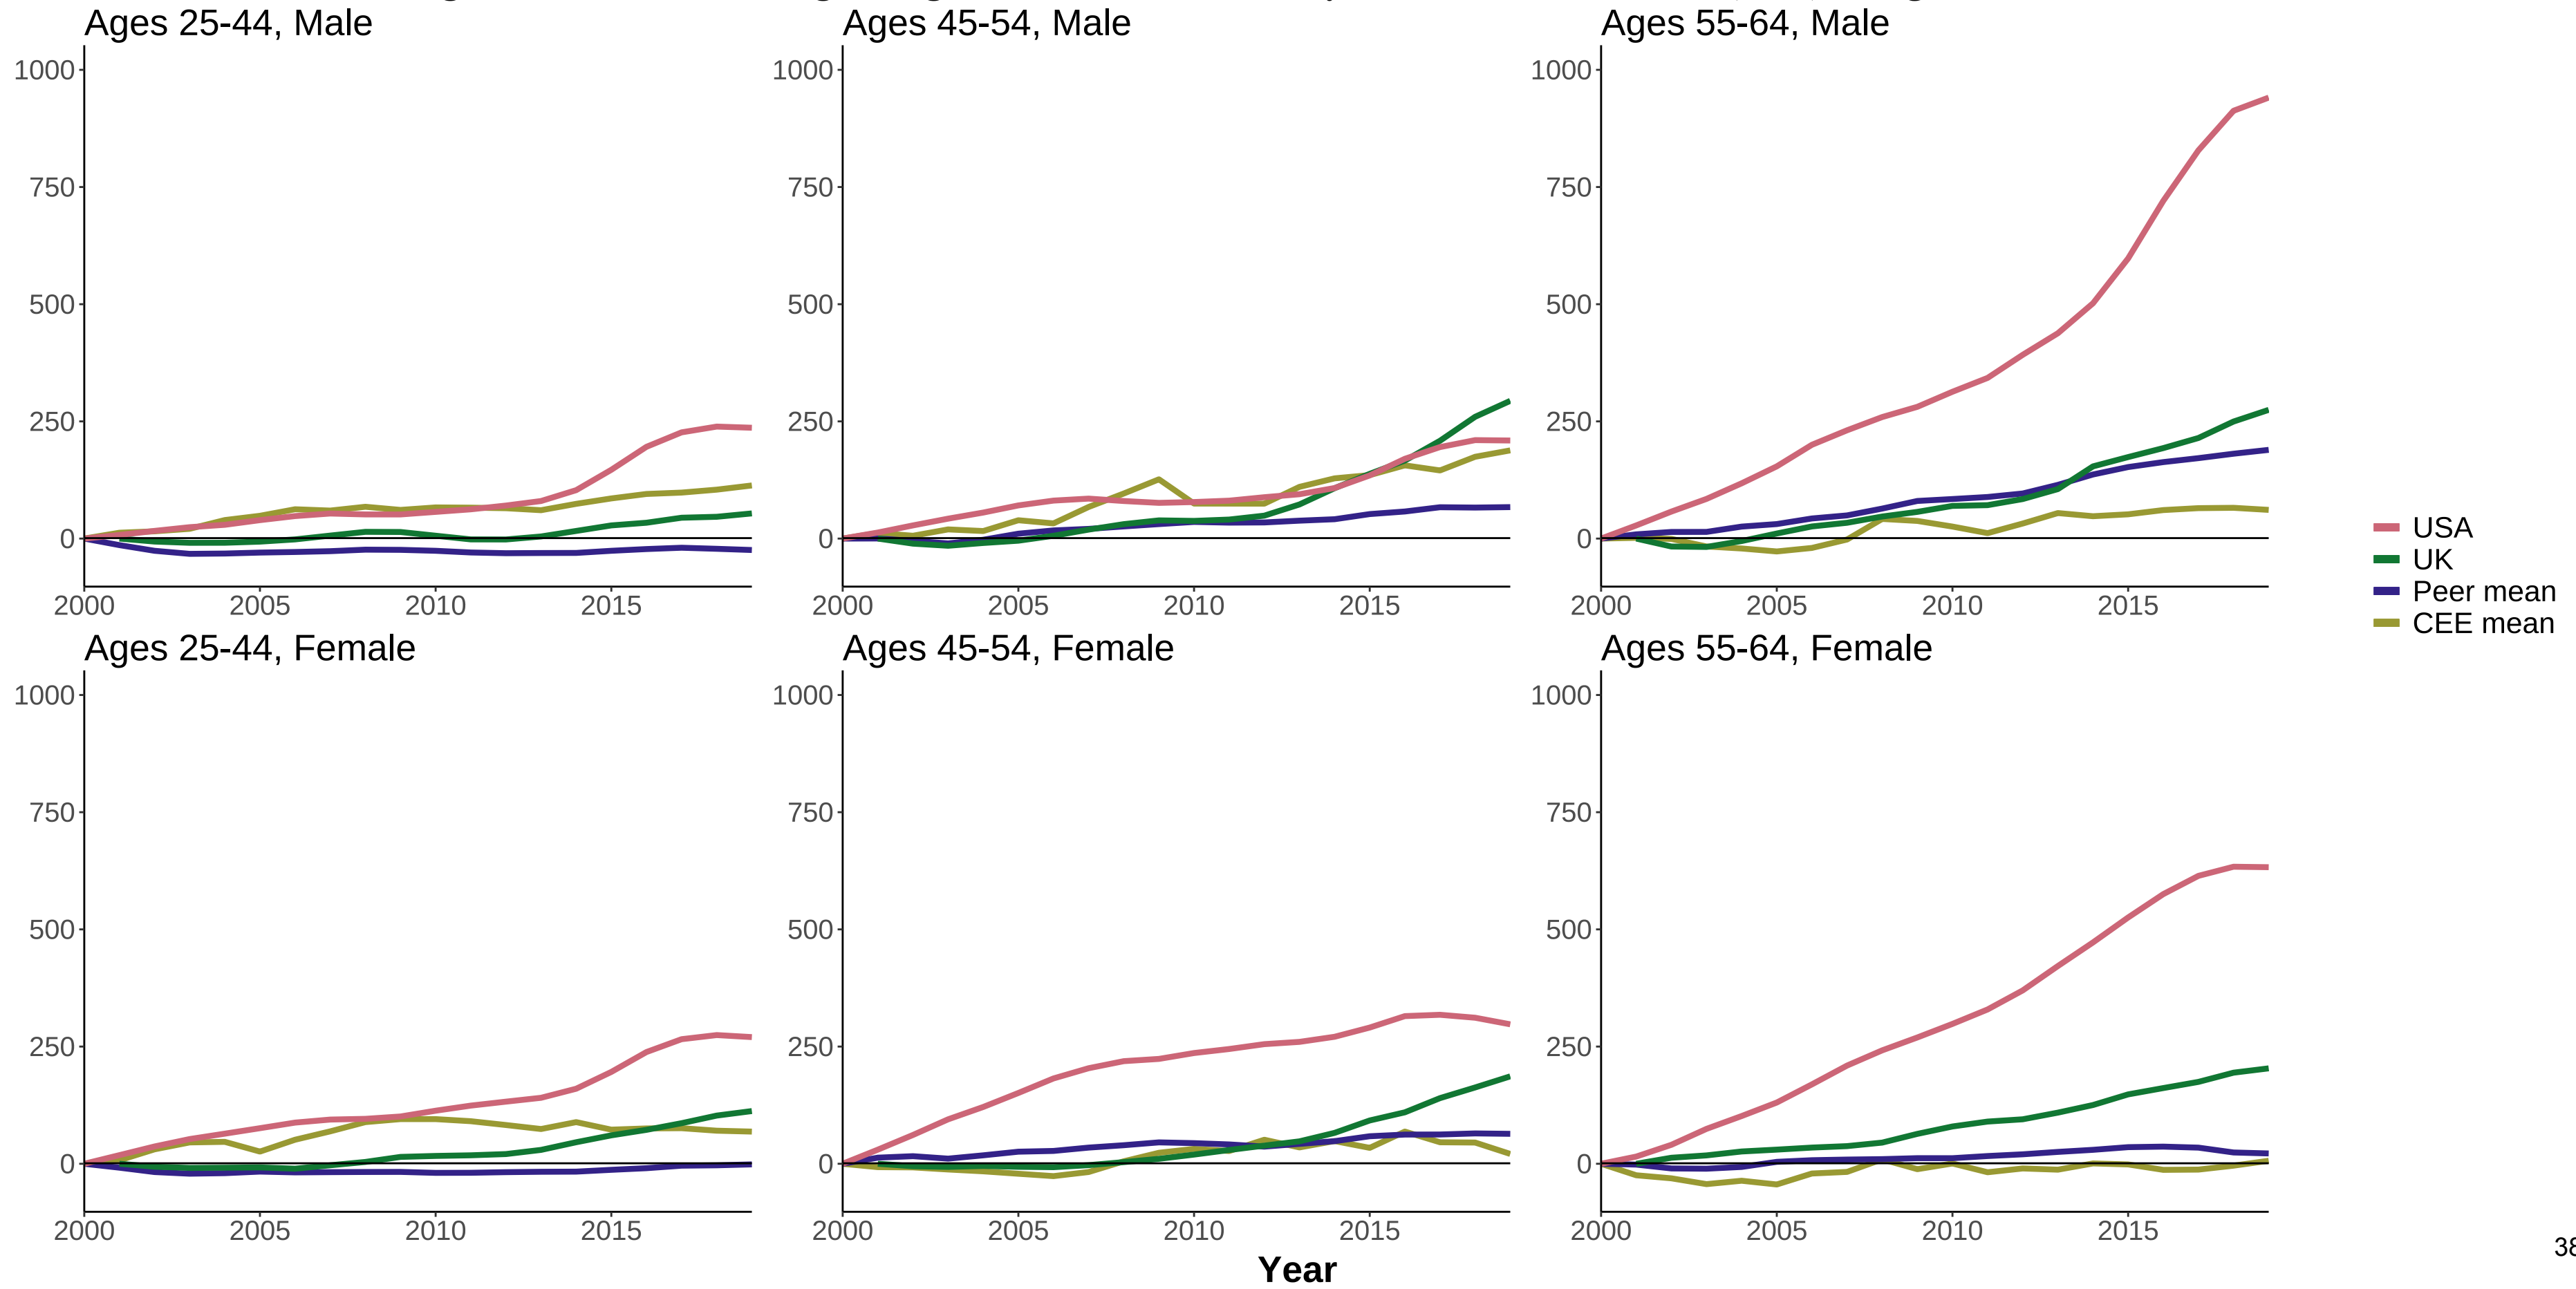

**Figure S32. Percent Change in Age-Standardized Mortality from the Baseline Year (2000), Alcohol-Related Causes**

Percent Change in Deaths per 100,000

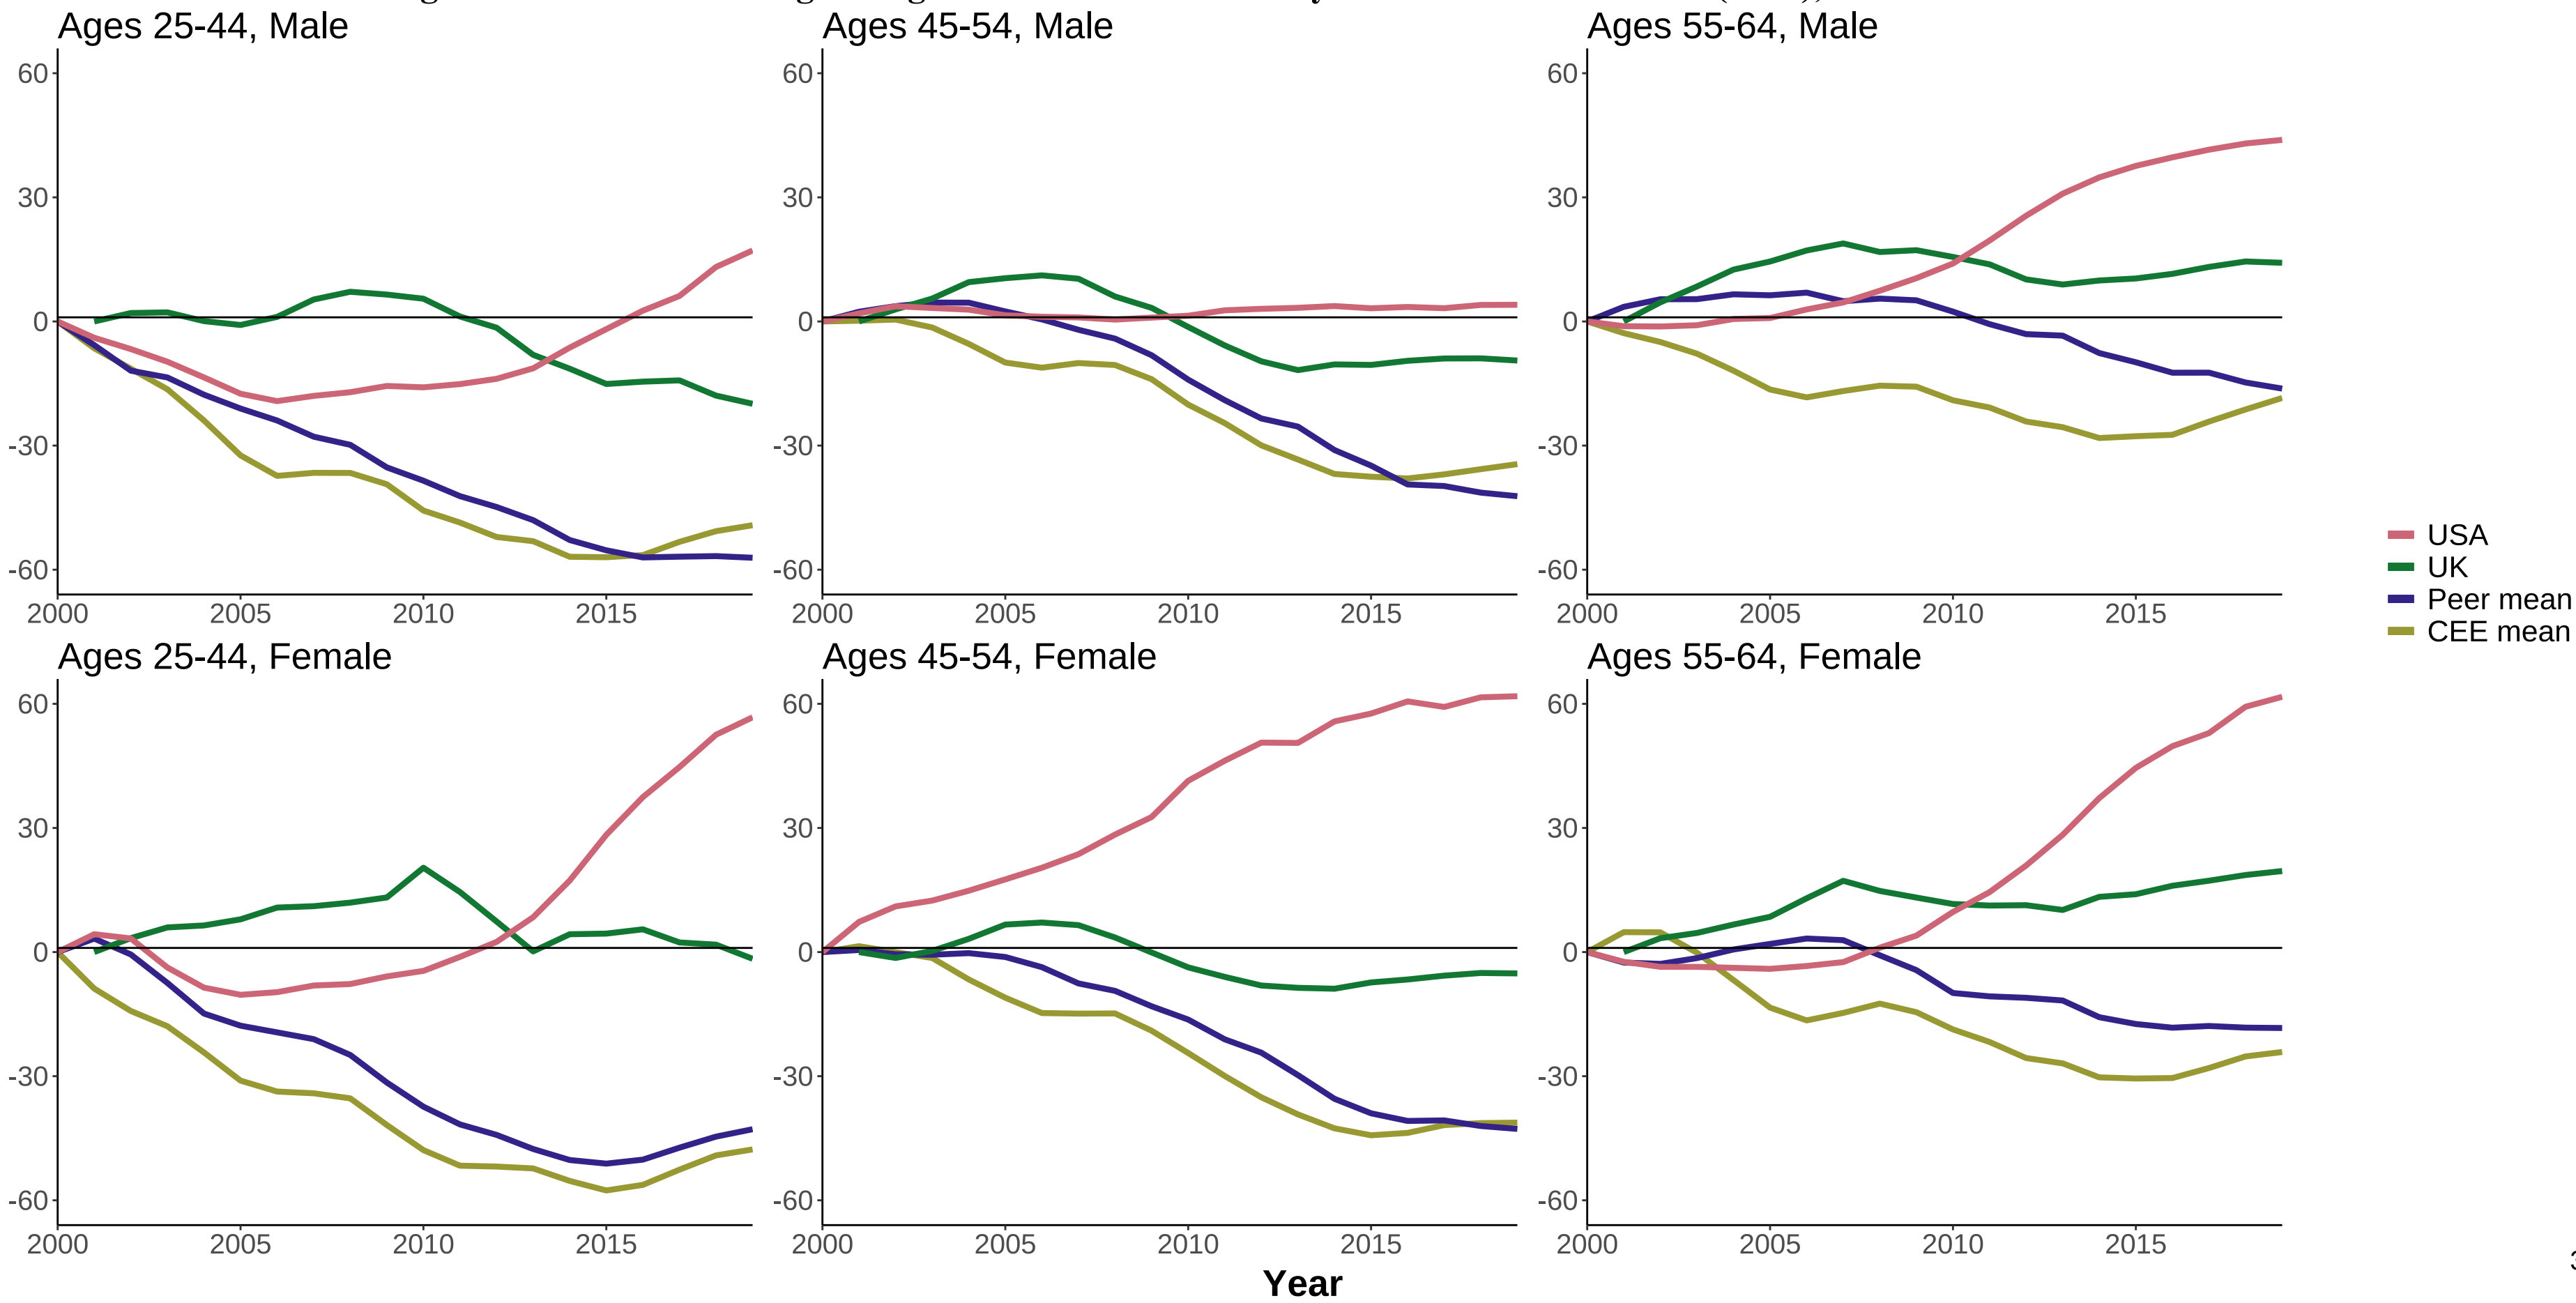

**Figure S33. Percent Change in All-Cause Mortality Between 1990 and 2019/Males, Ages 25-44**

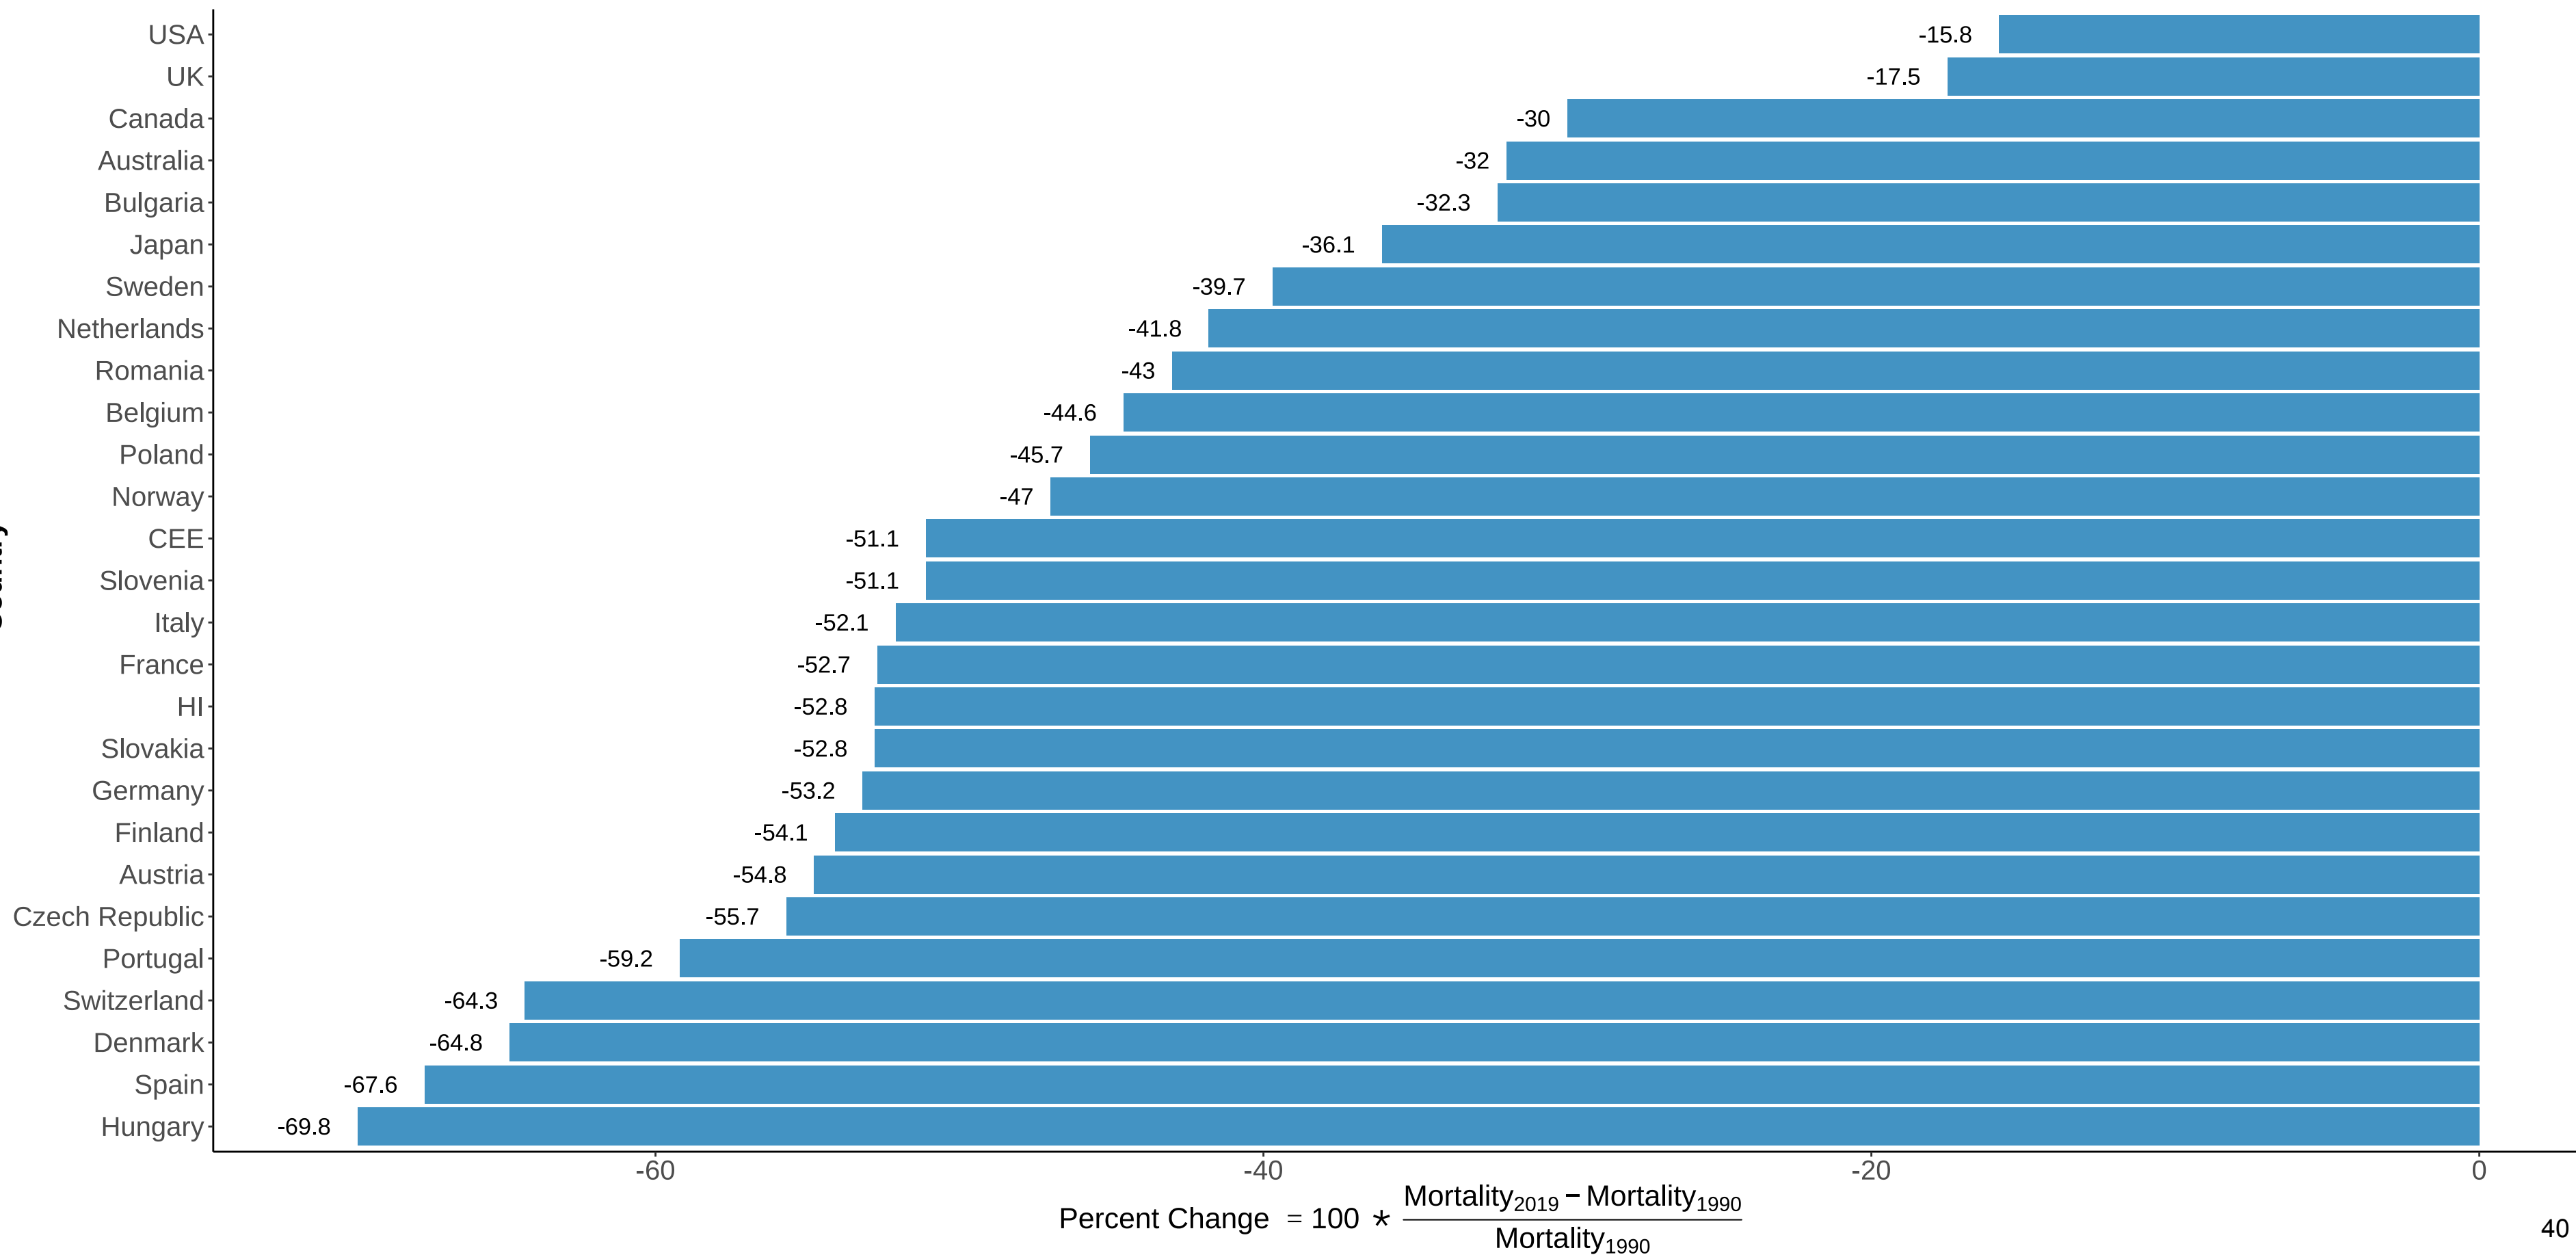

**Figure S34. Percent Change in All-Cause Mortality Between 1990 and 2019/Males, Ages 45-54**

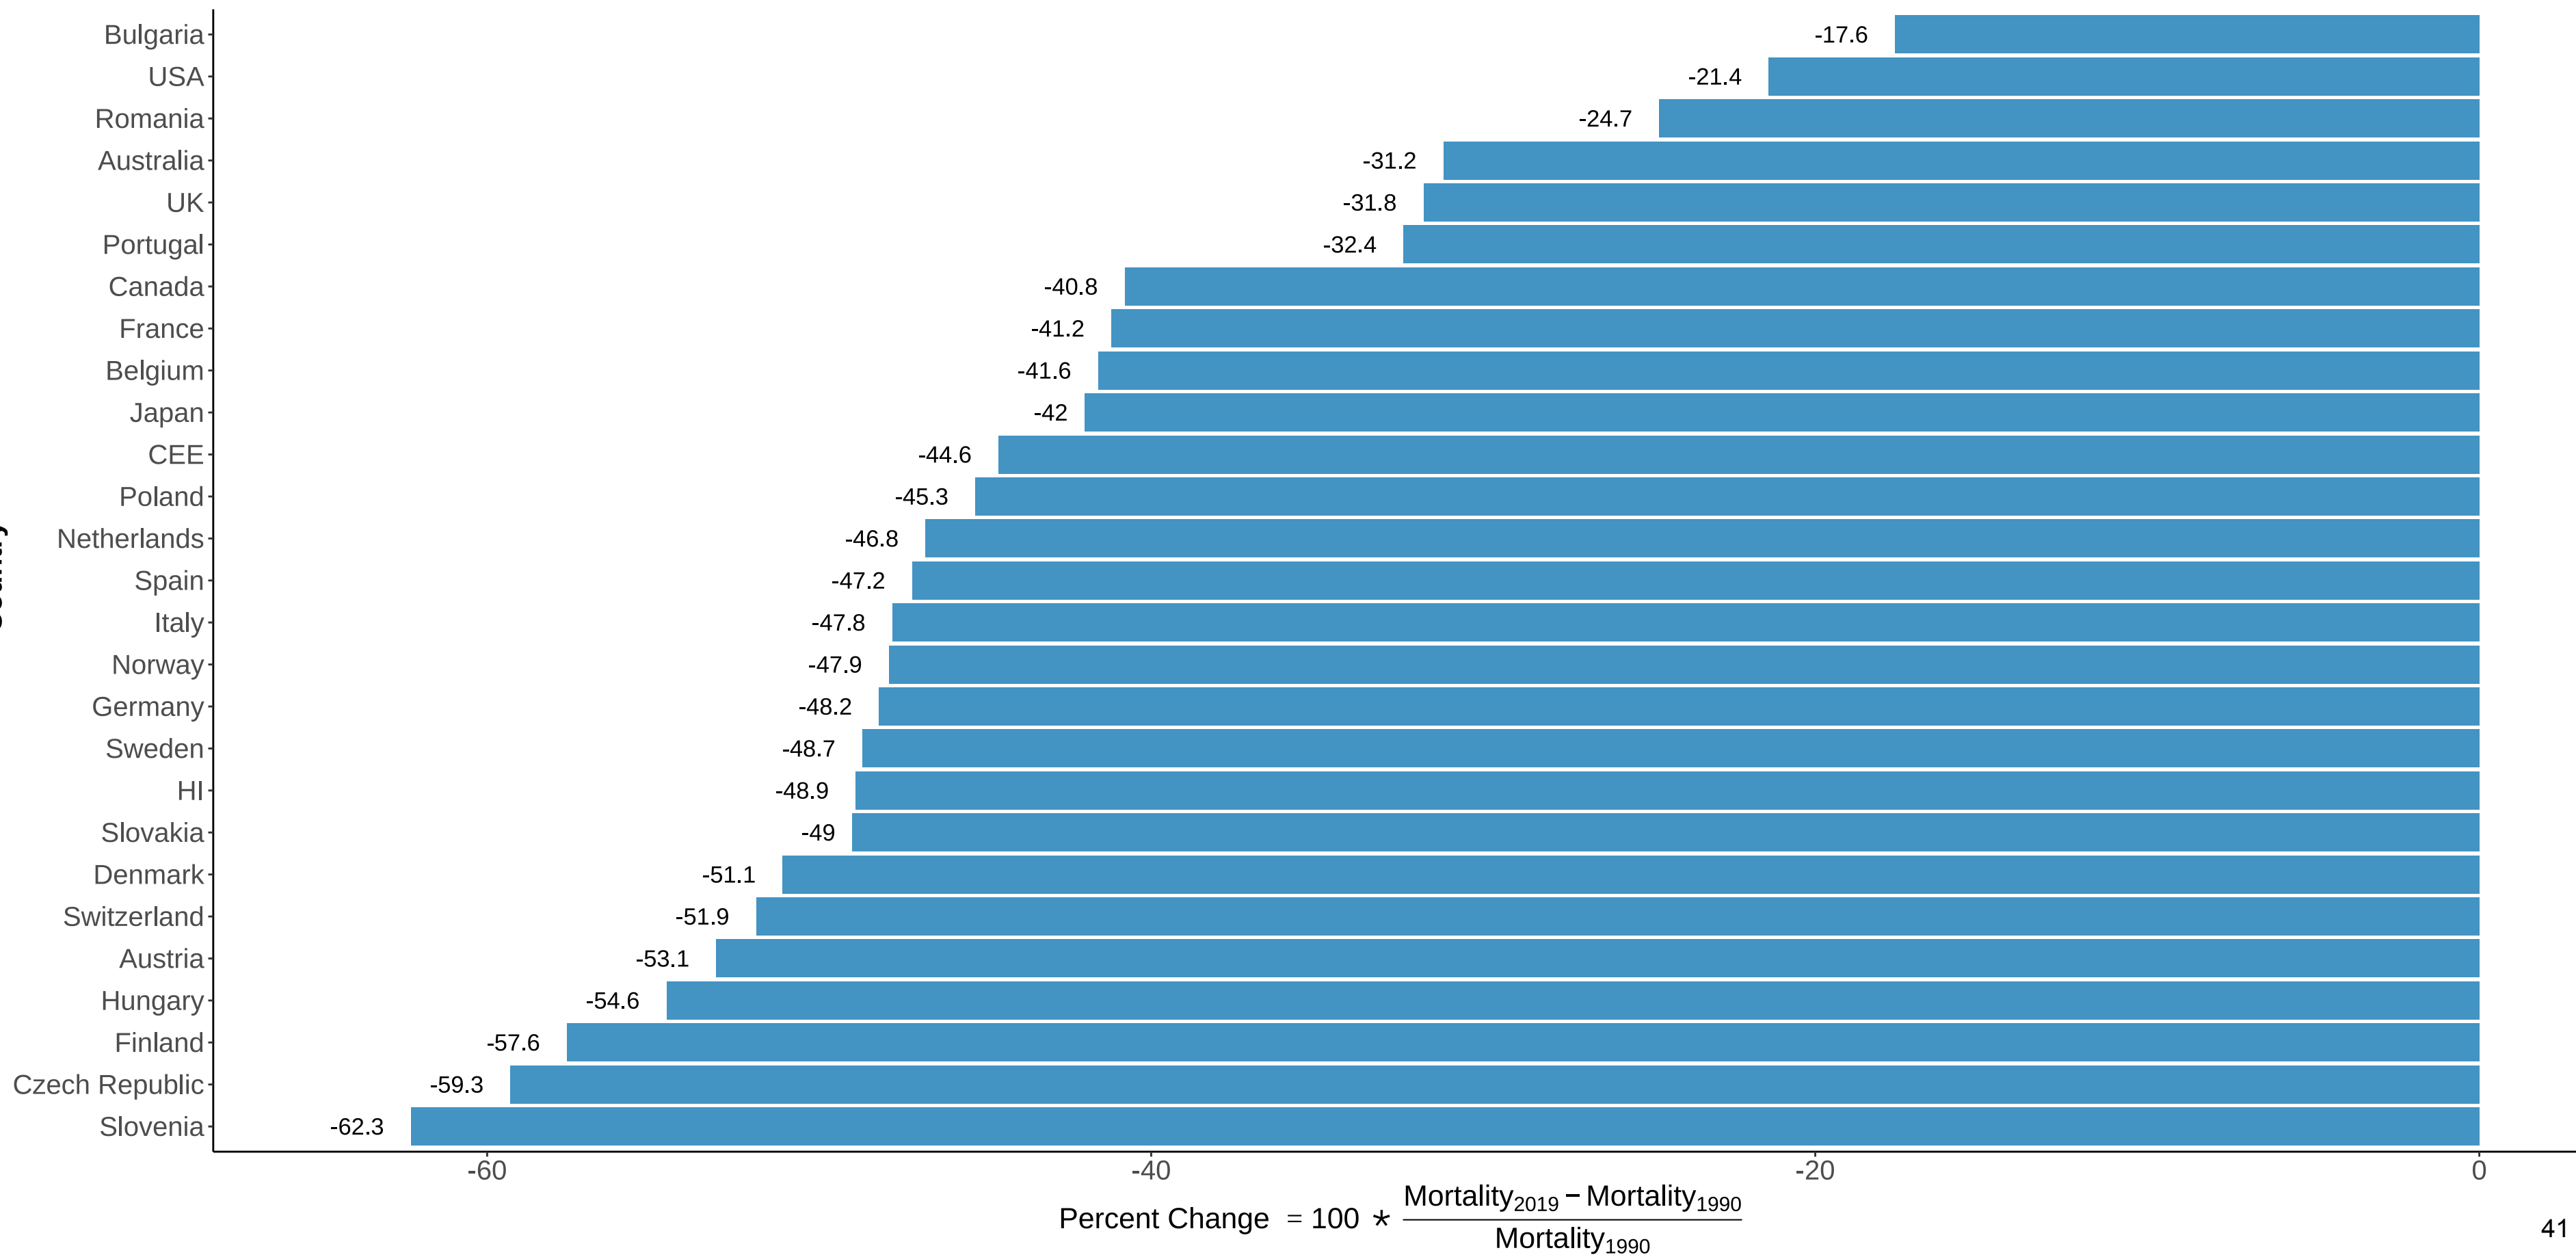

**Figure S35. Percent Change in All-Cause Mortality Between 1990 and 2019/Males, Ages 55-64**

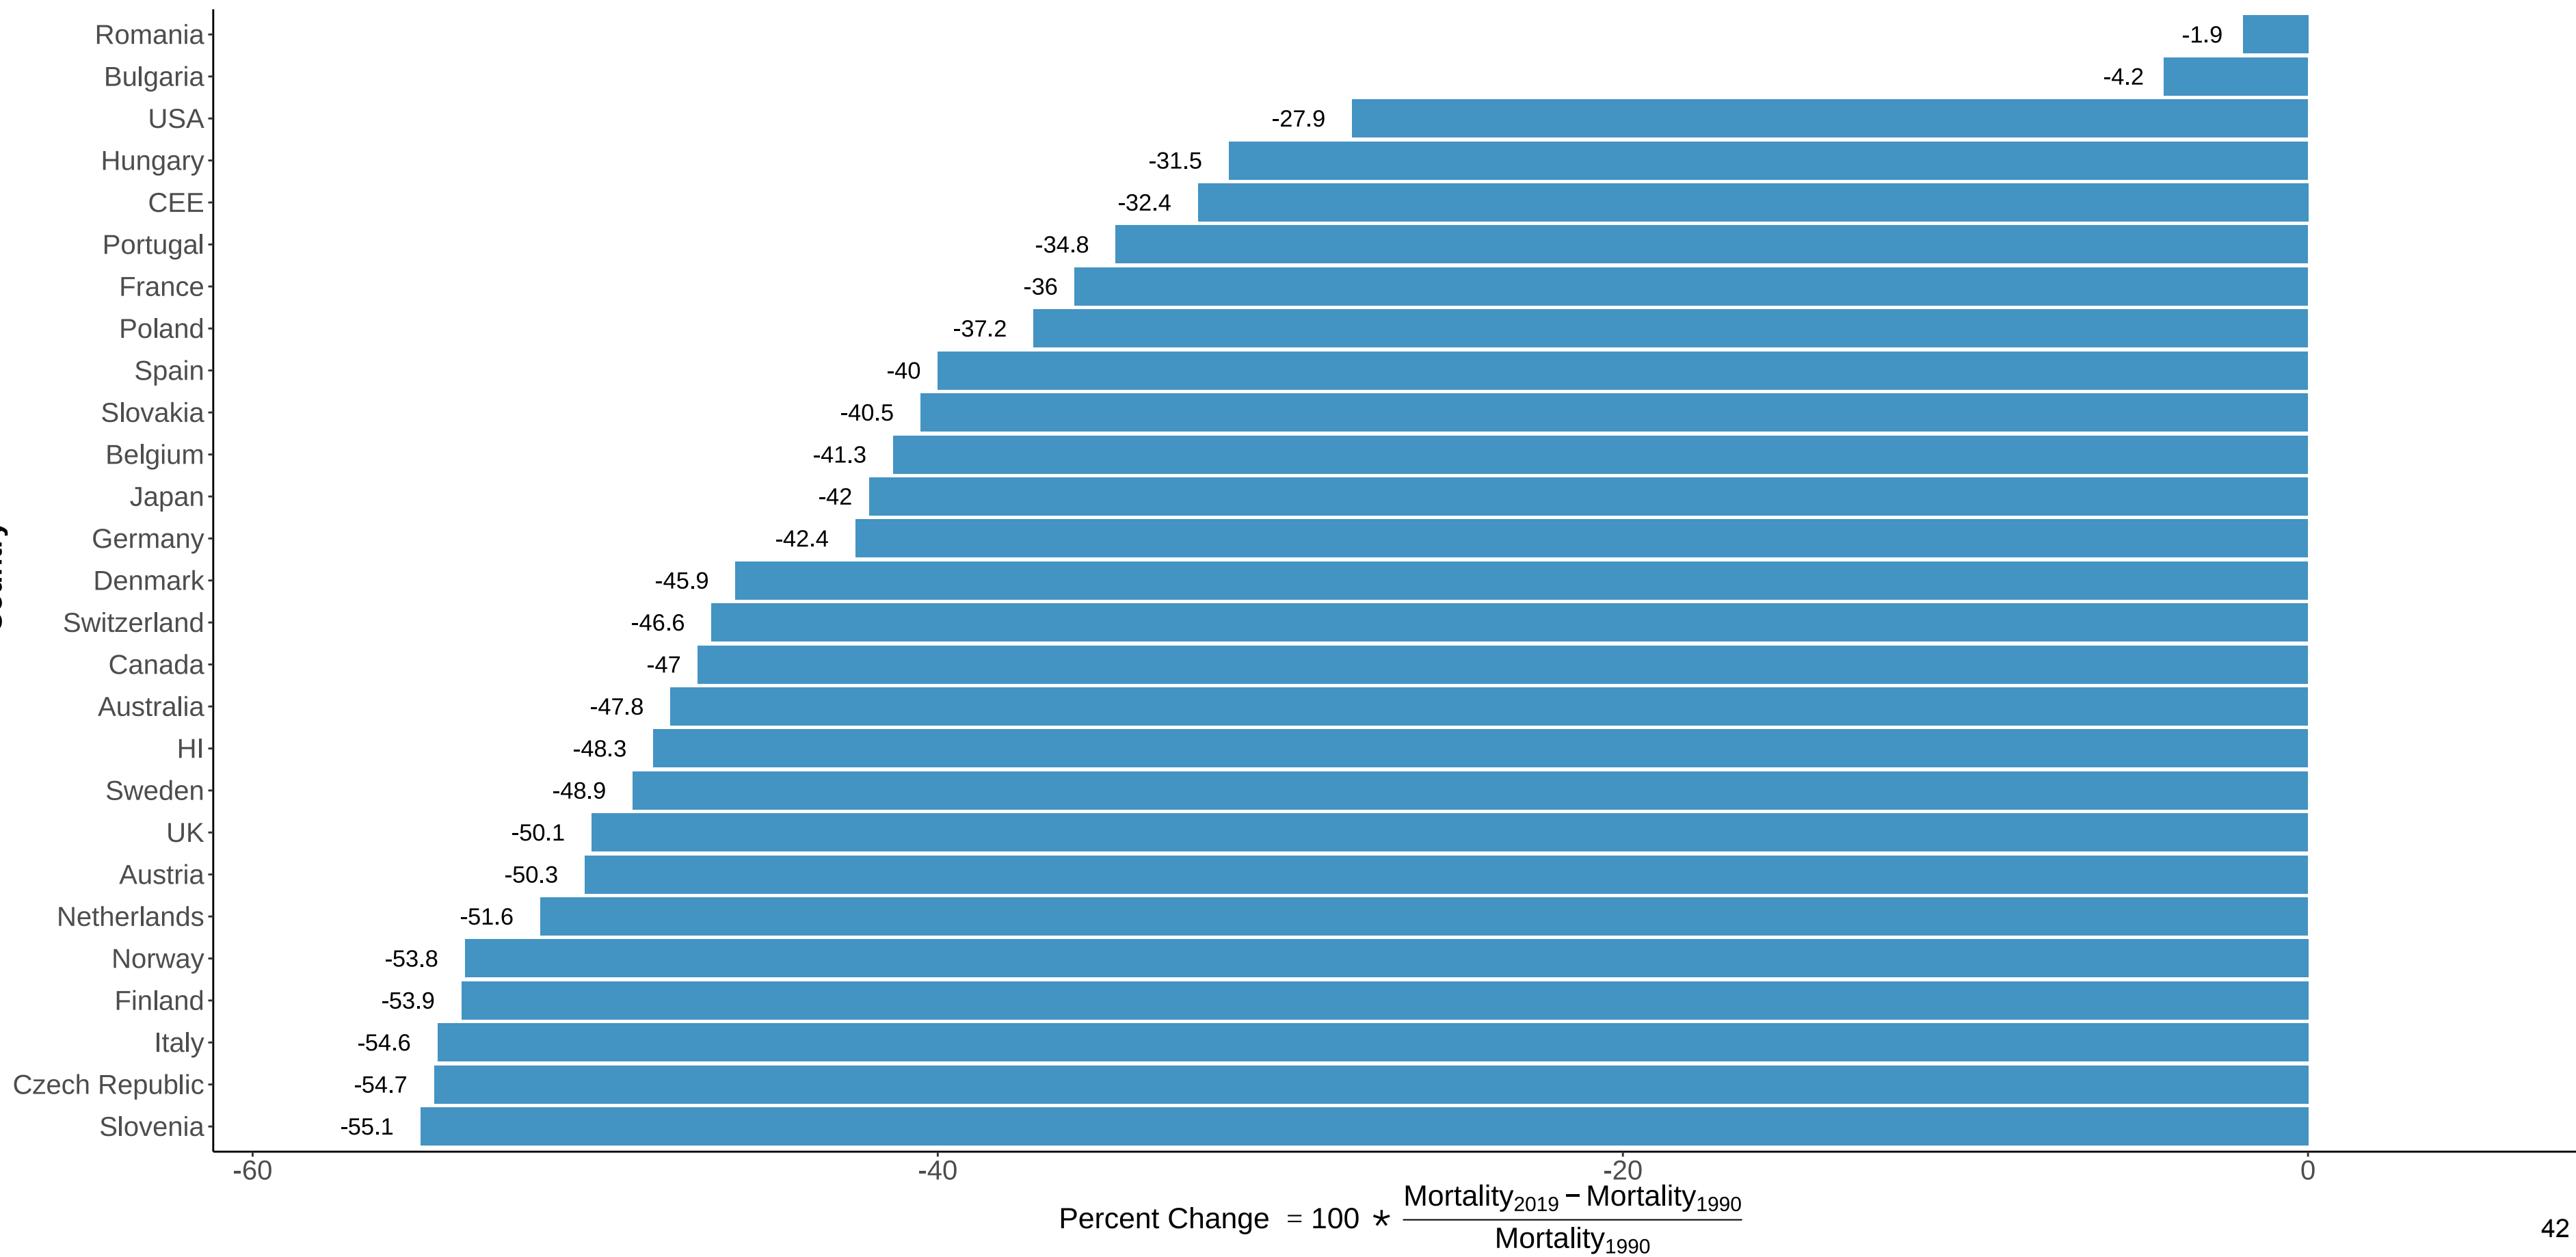

**Figure S36. Percent Change in All-Cause Mortality Between 1990 and 2019/Females, Ages 25-44**

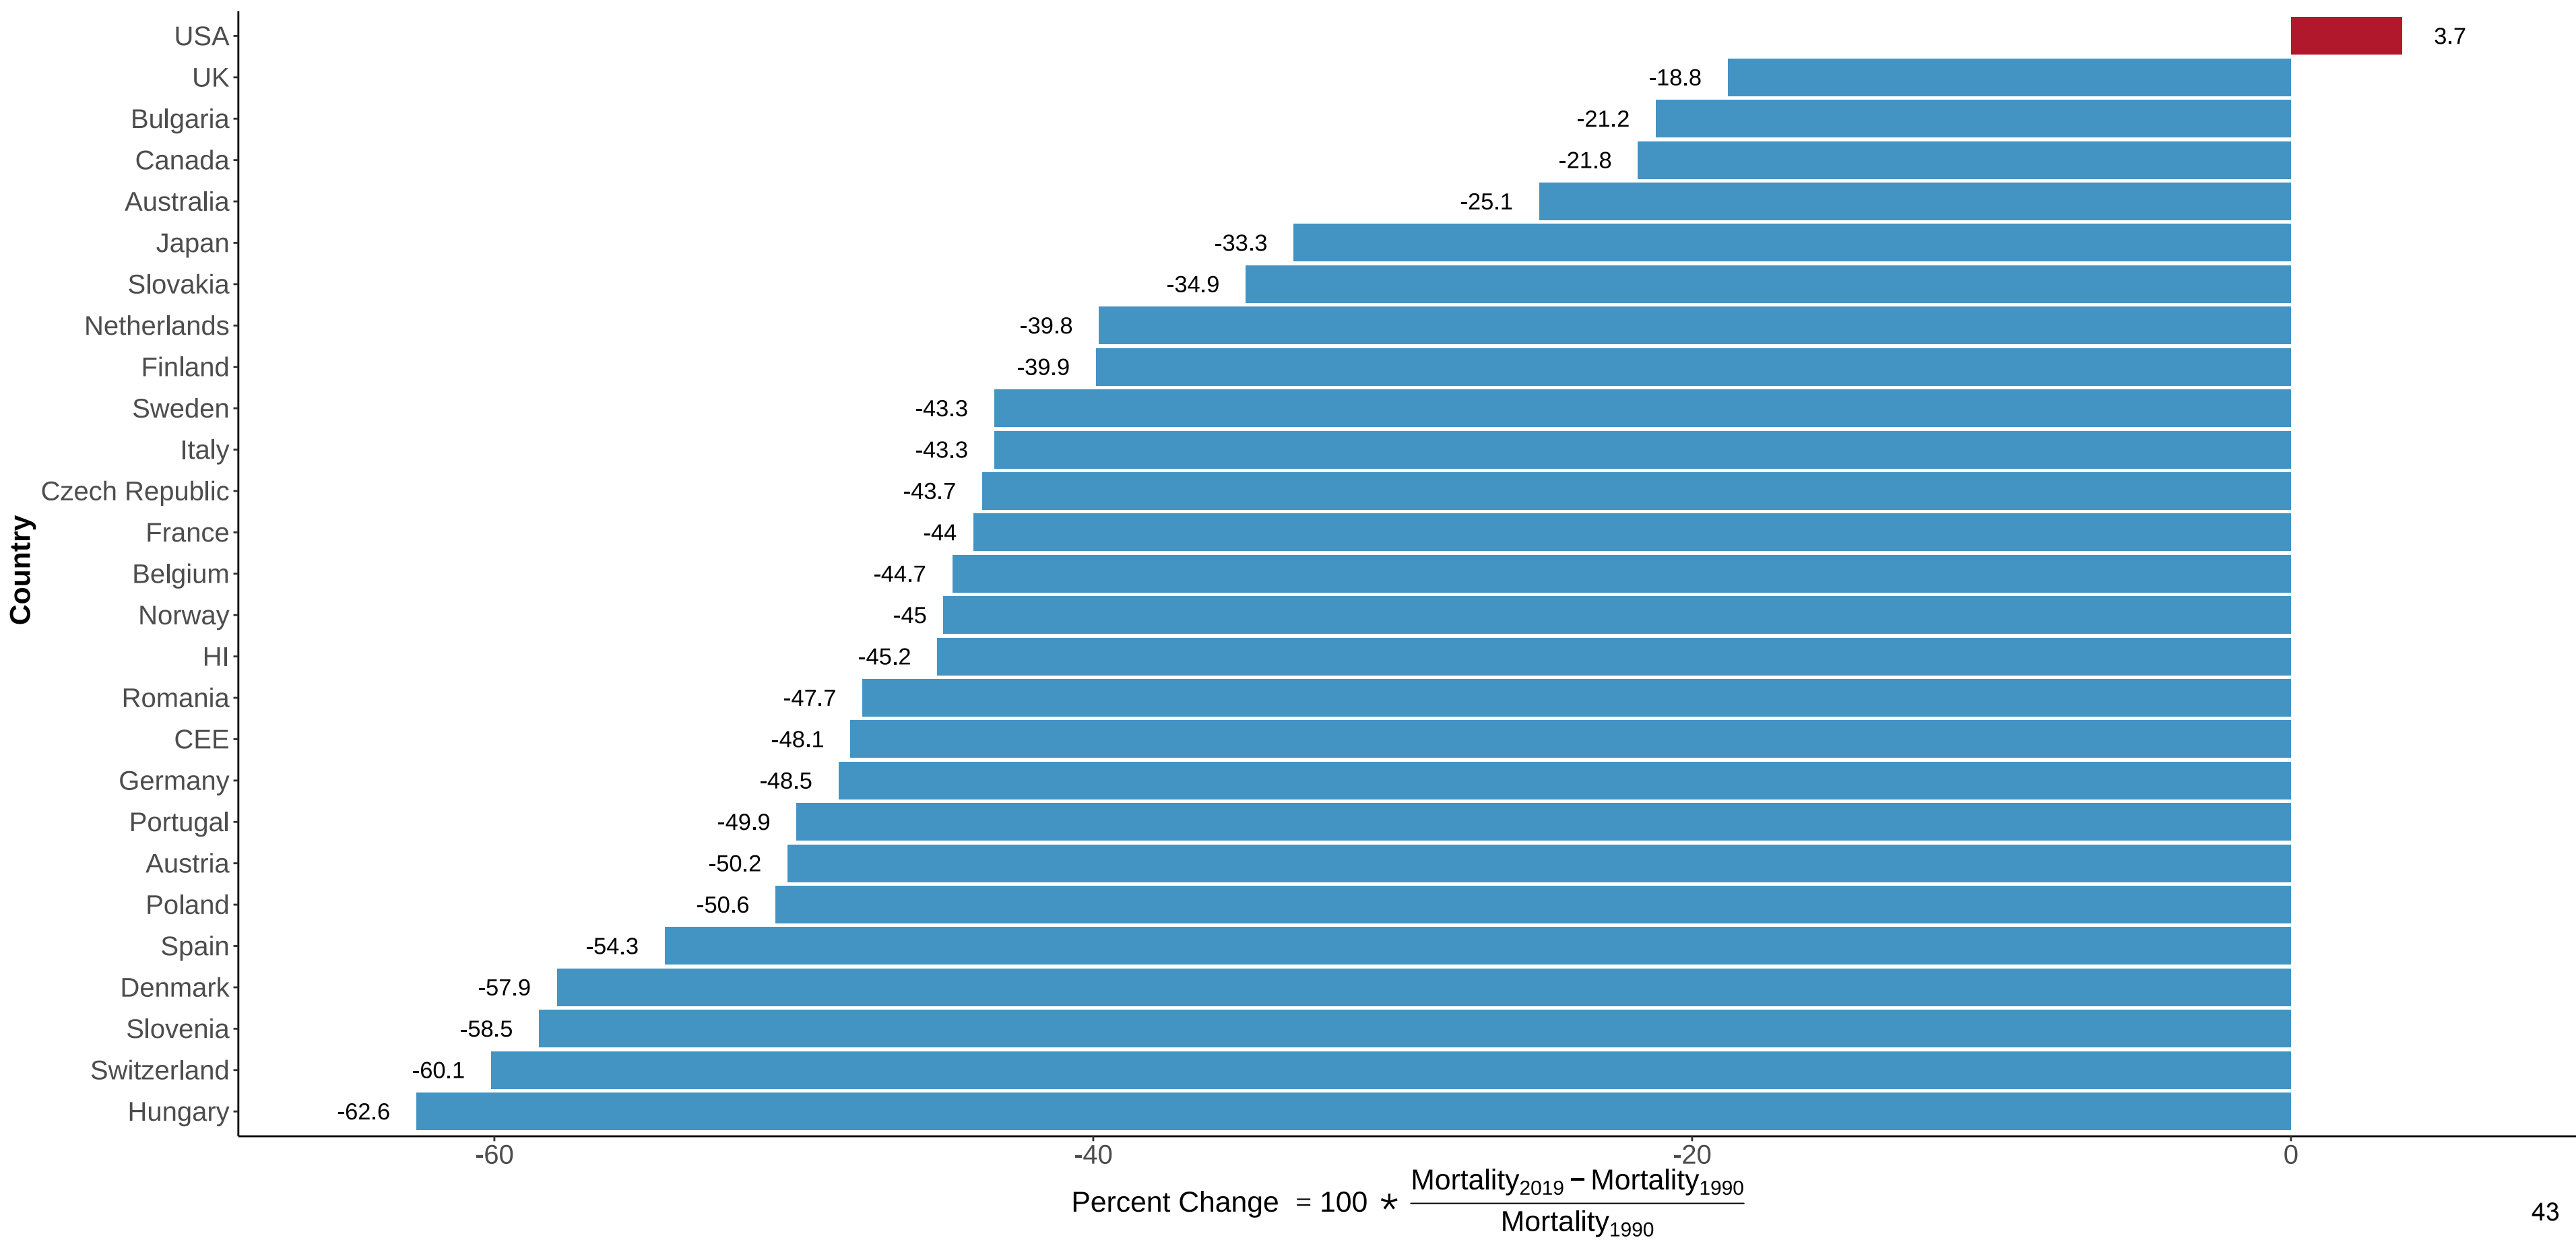

**Figure S37. Percent Change in All-Cause Mortality Between 1990 and 2019/Females, Ages 45-54**

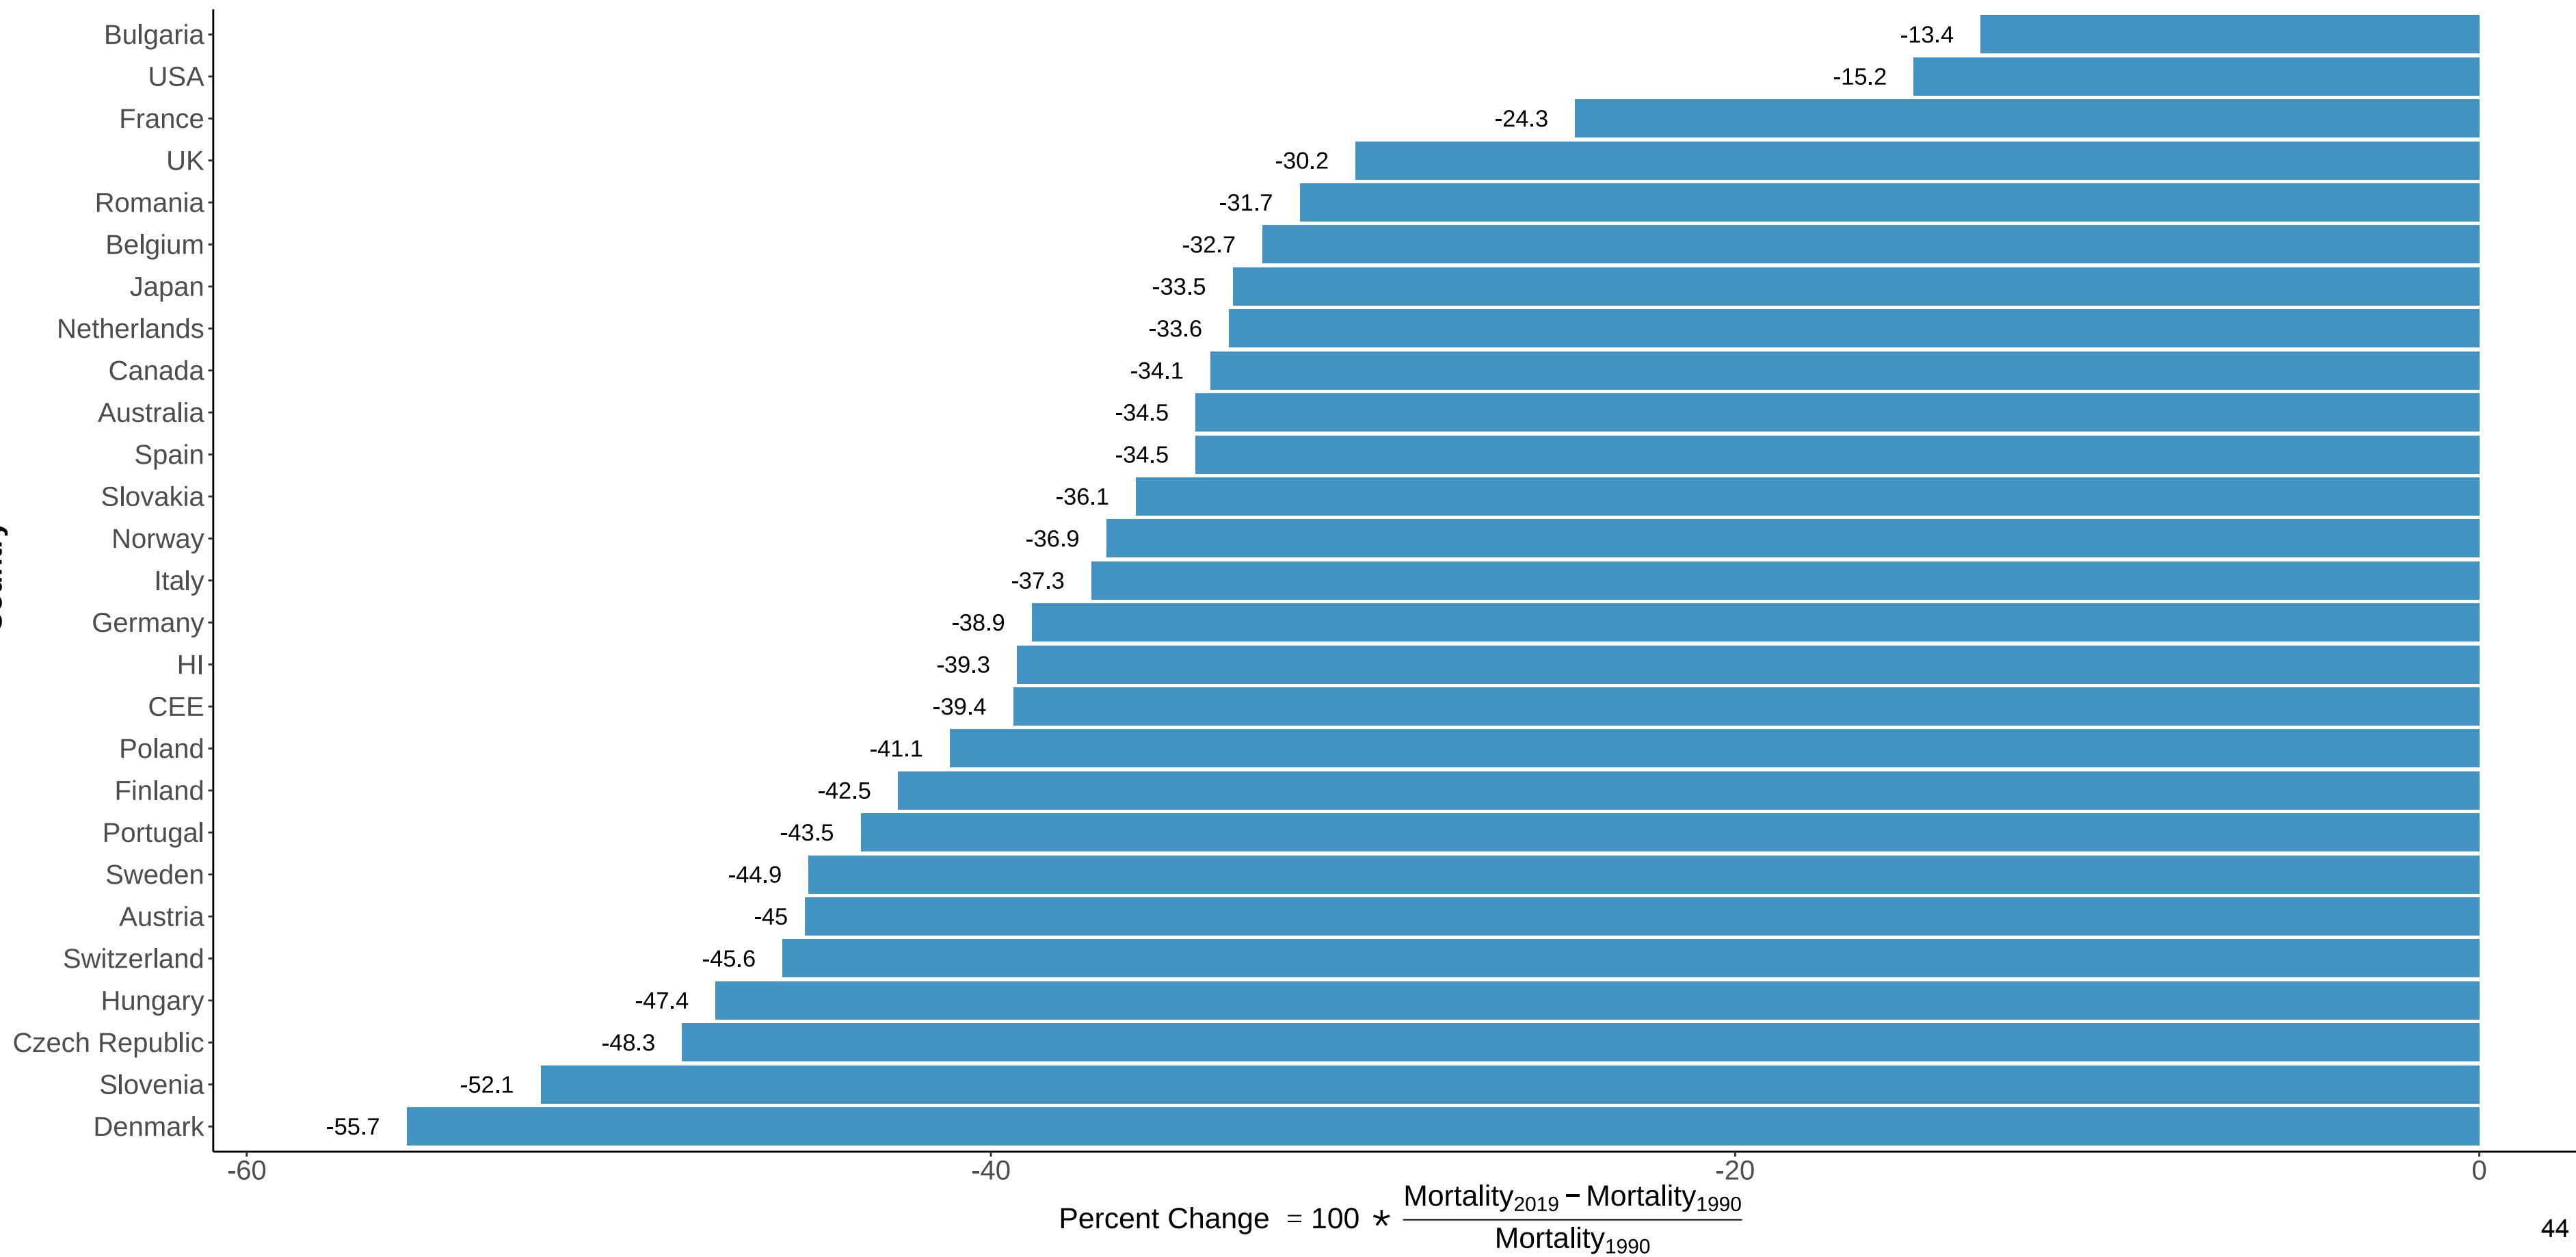

**Figure S38. Percent Change in All-Cause Mortality Between 1990 and 2019/Females, Ages 55-64**

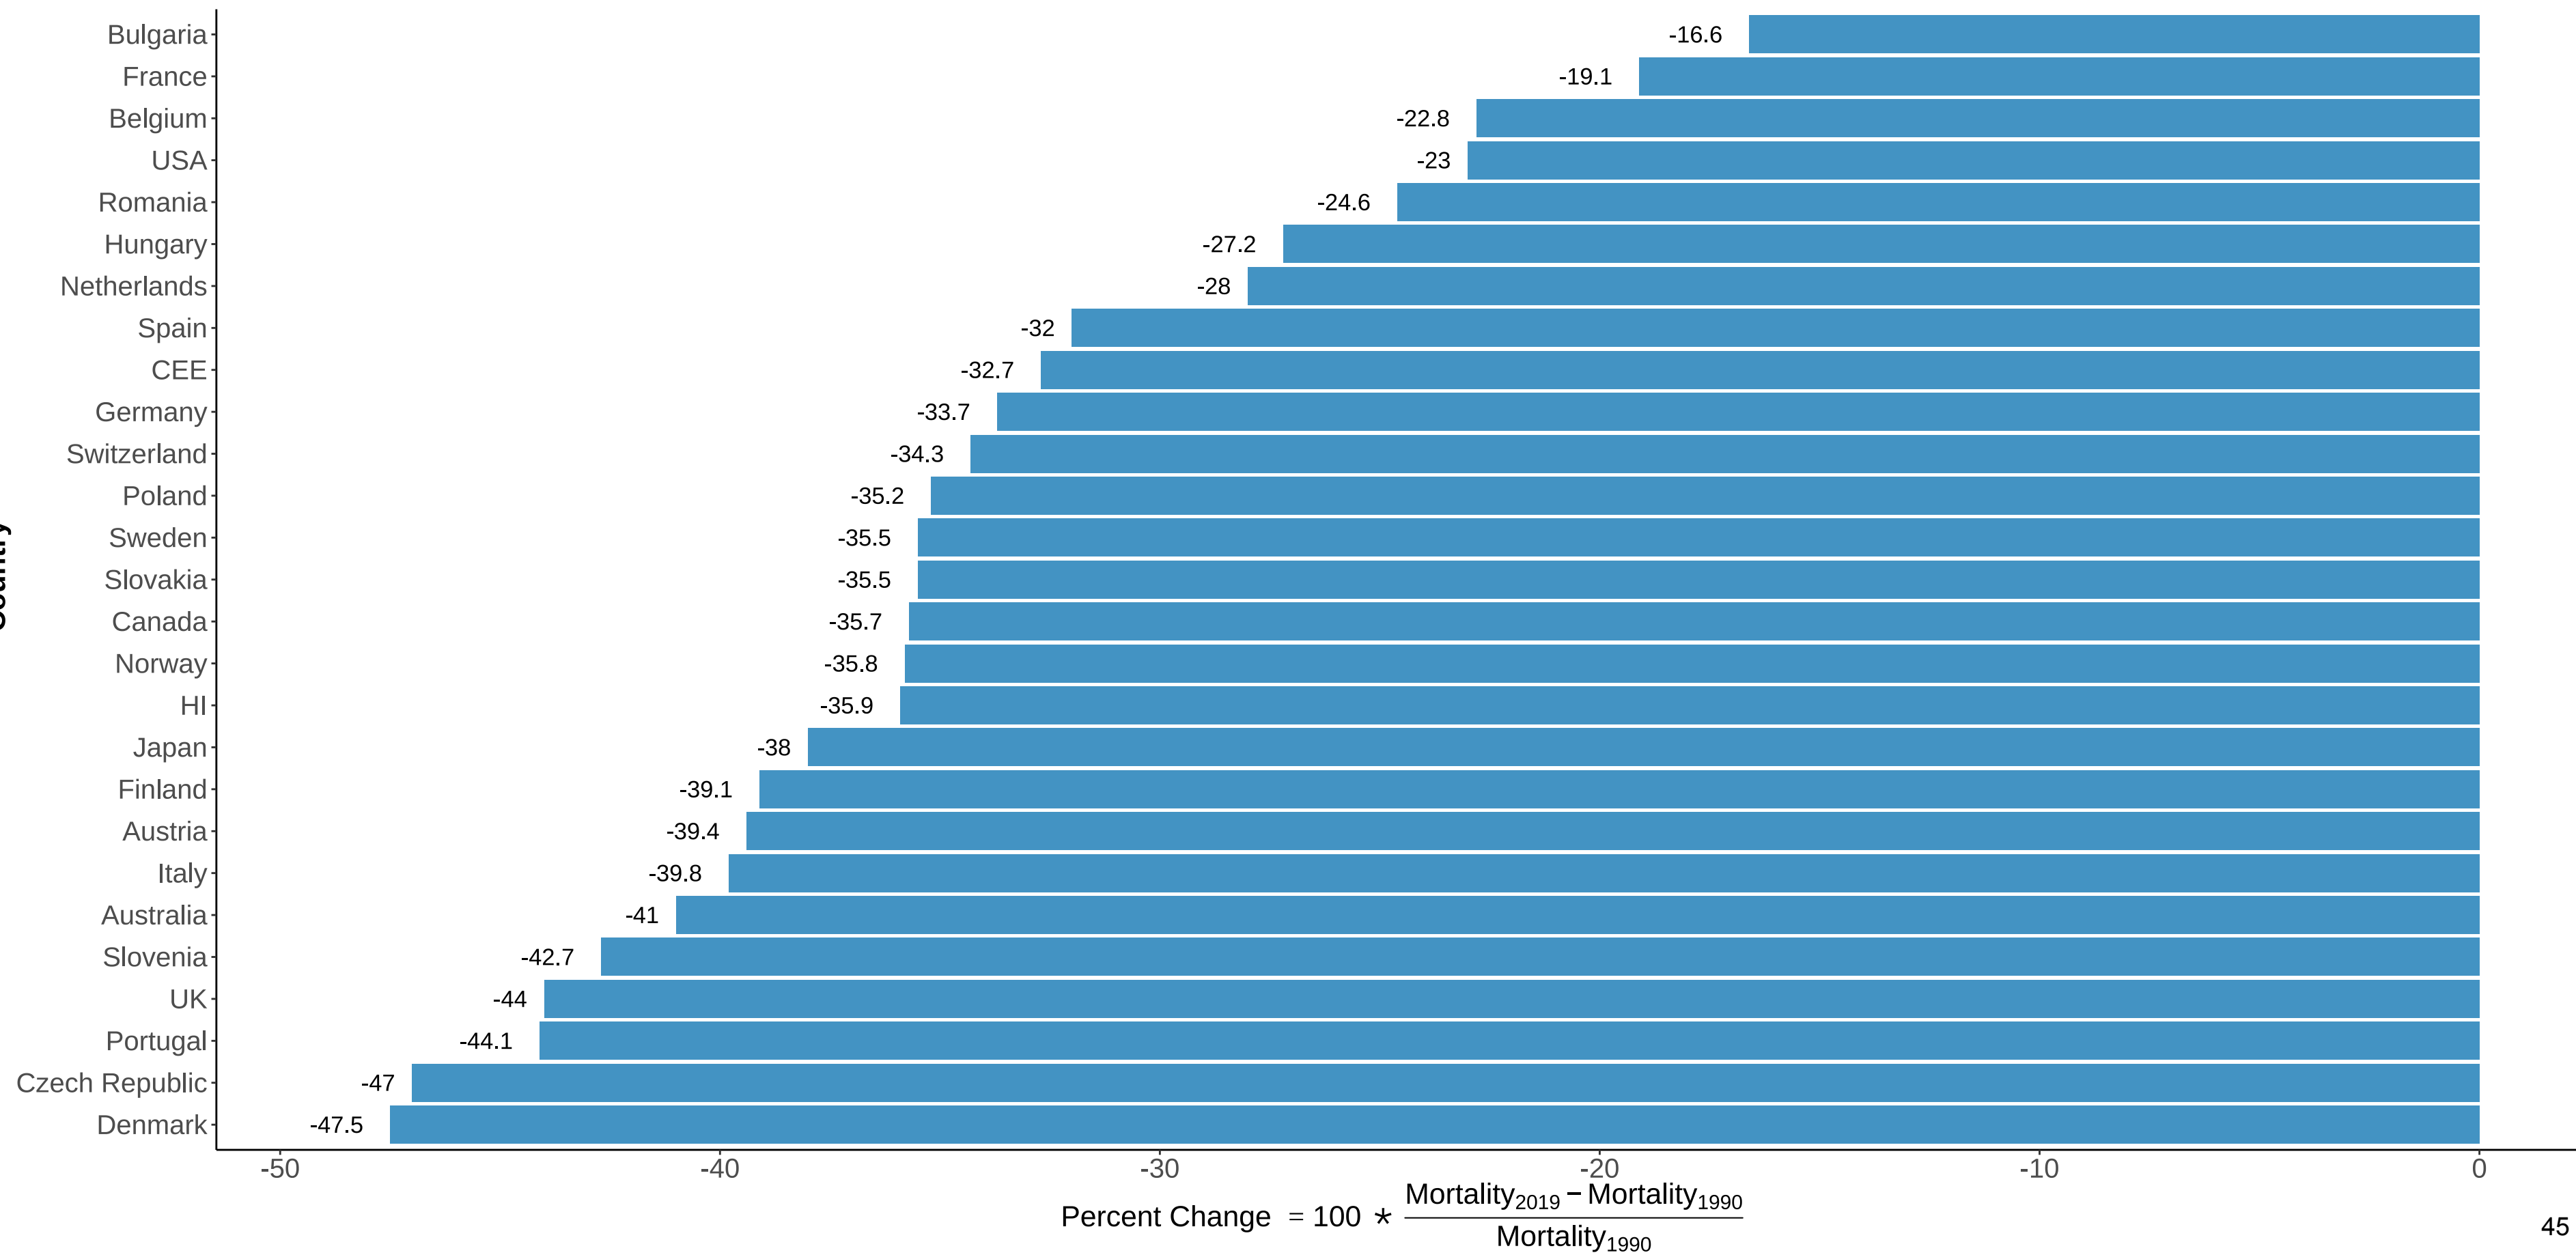

**Figure S39. Three-Year Moving Average of Male Mortality from Infectious and Parasitic Diseases at Ages 25-44**

Deaths per 100,000

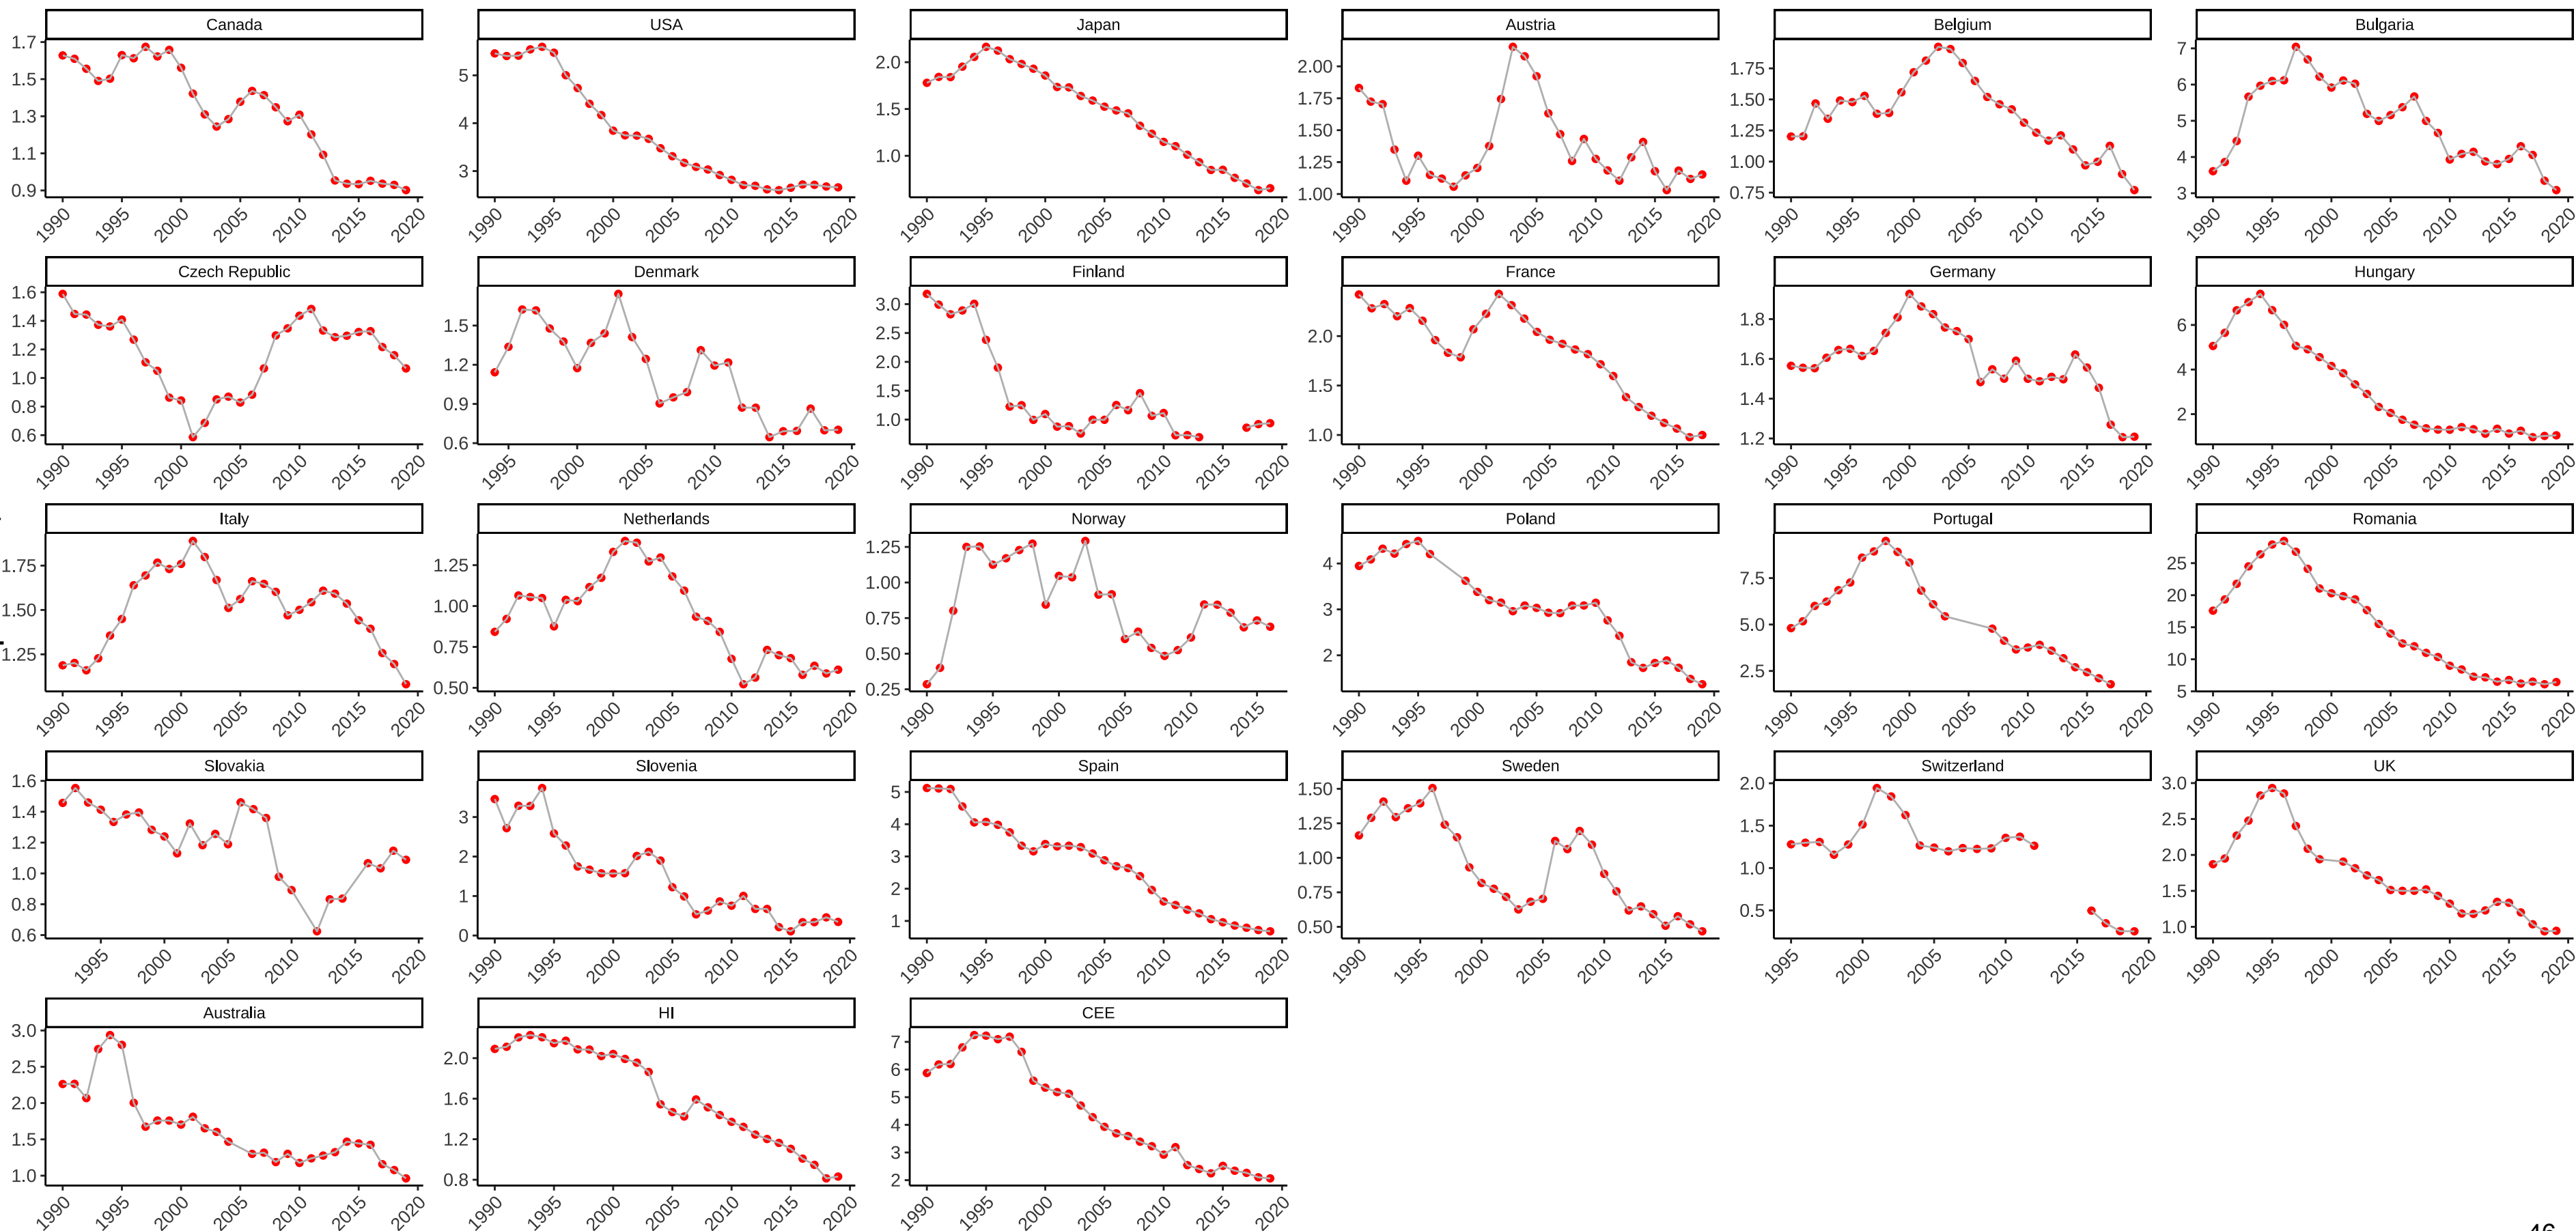

Year

**Figure S40. Three-Year Moving Average of Female Mortality from Infectious and Parasitic Diseases at Ages 25-44**

Deaths per 100,000

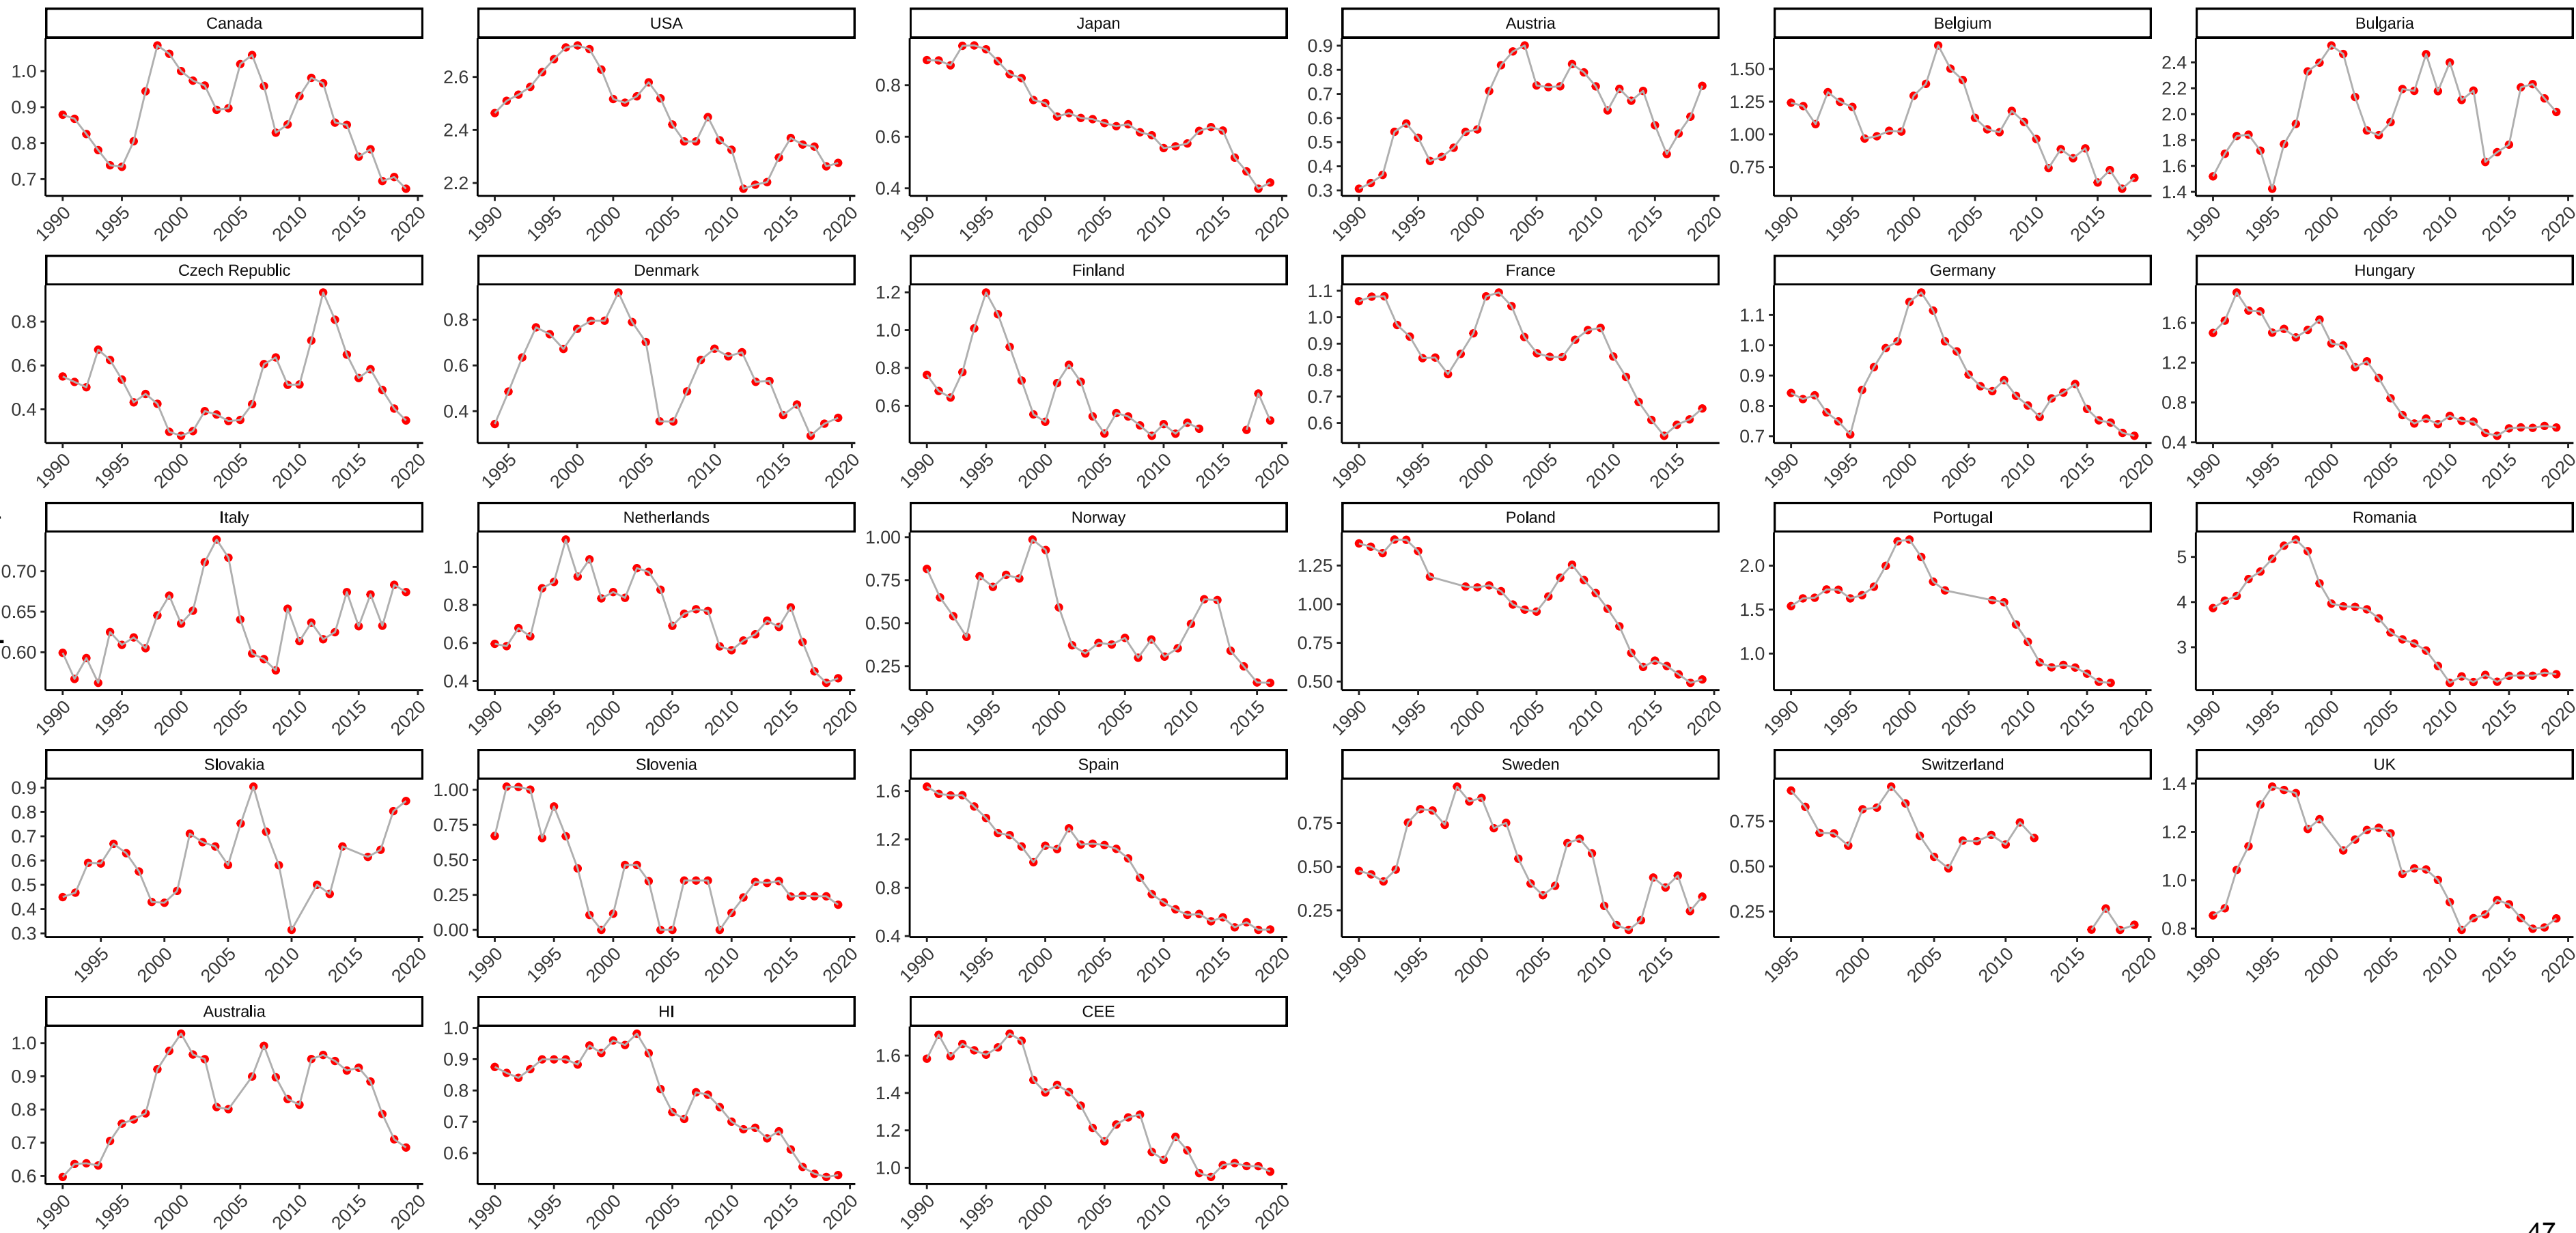

**Figure S41. Three-Year Moving Average of Male Mortality from HIV/AIDS at Ages 25-44**

Deaths per 100,000

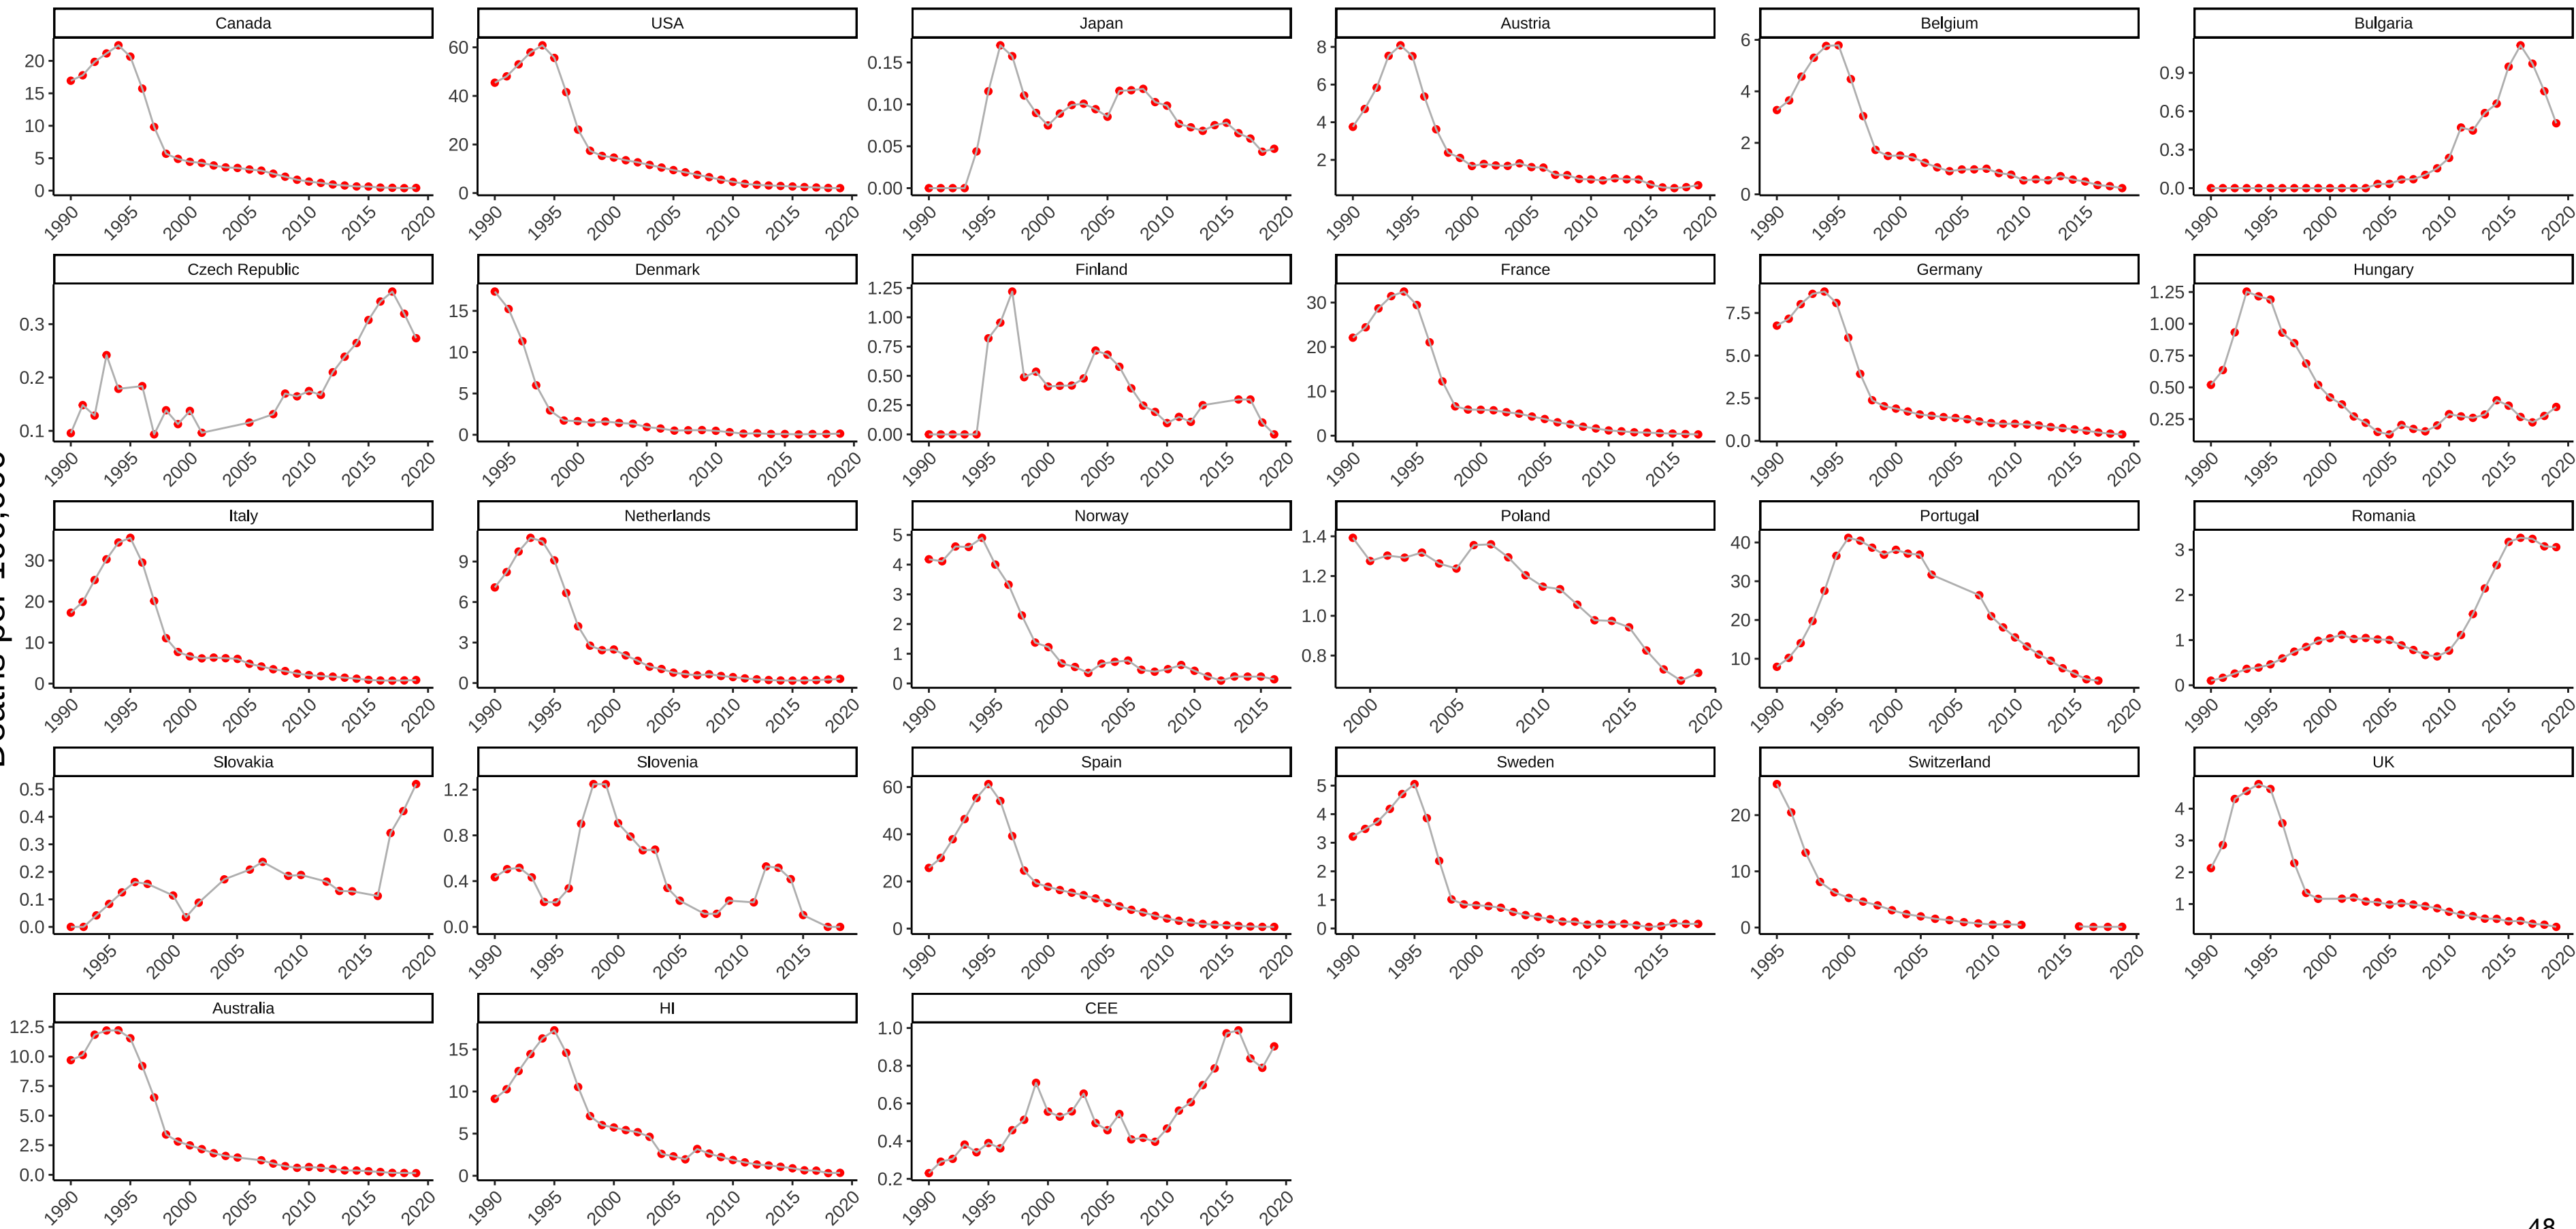

Year

**Figure S42. Three-Year Moving Average of Female Mortality from HIV/AIDS at Ages 25-44**

Deaths per 100,000

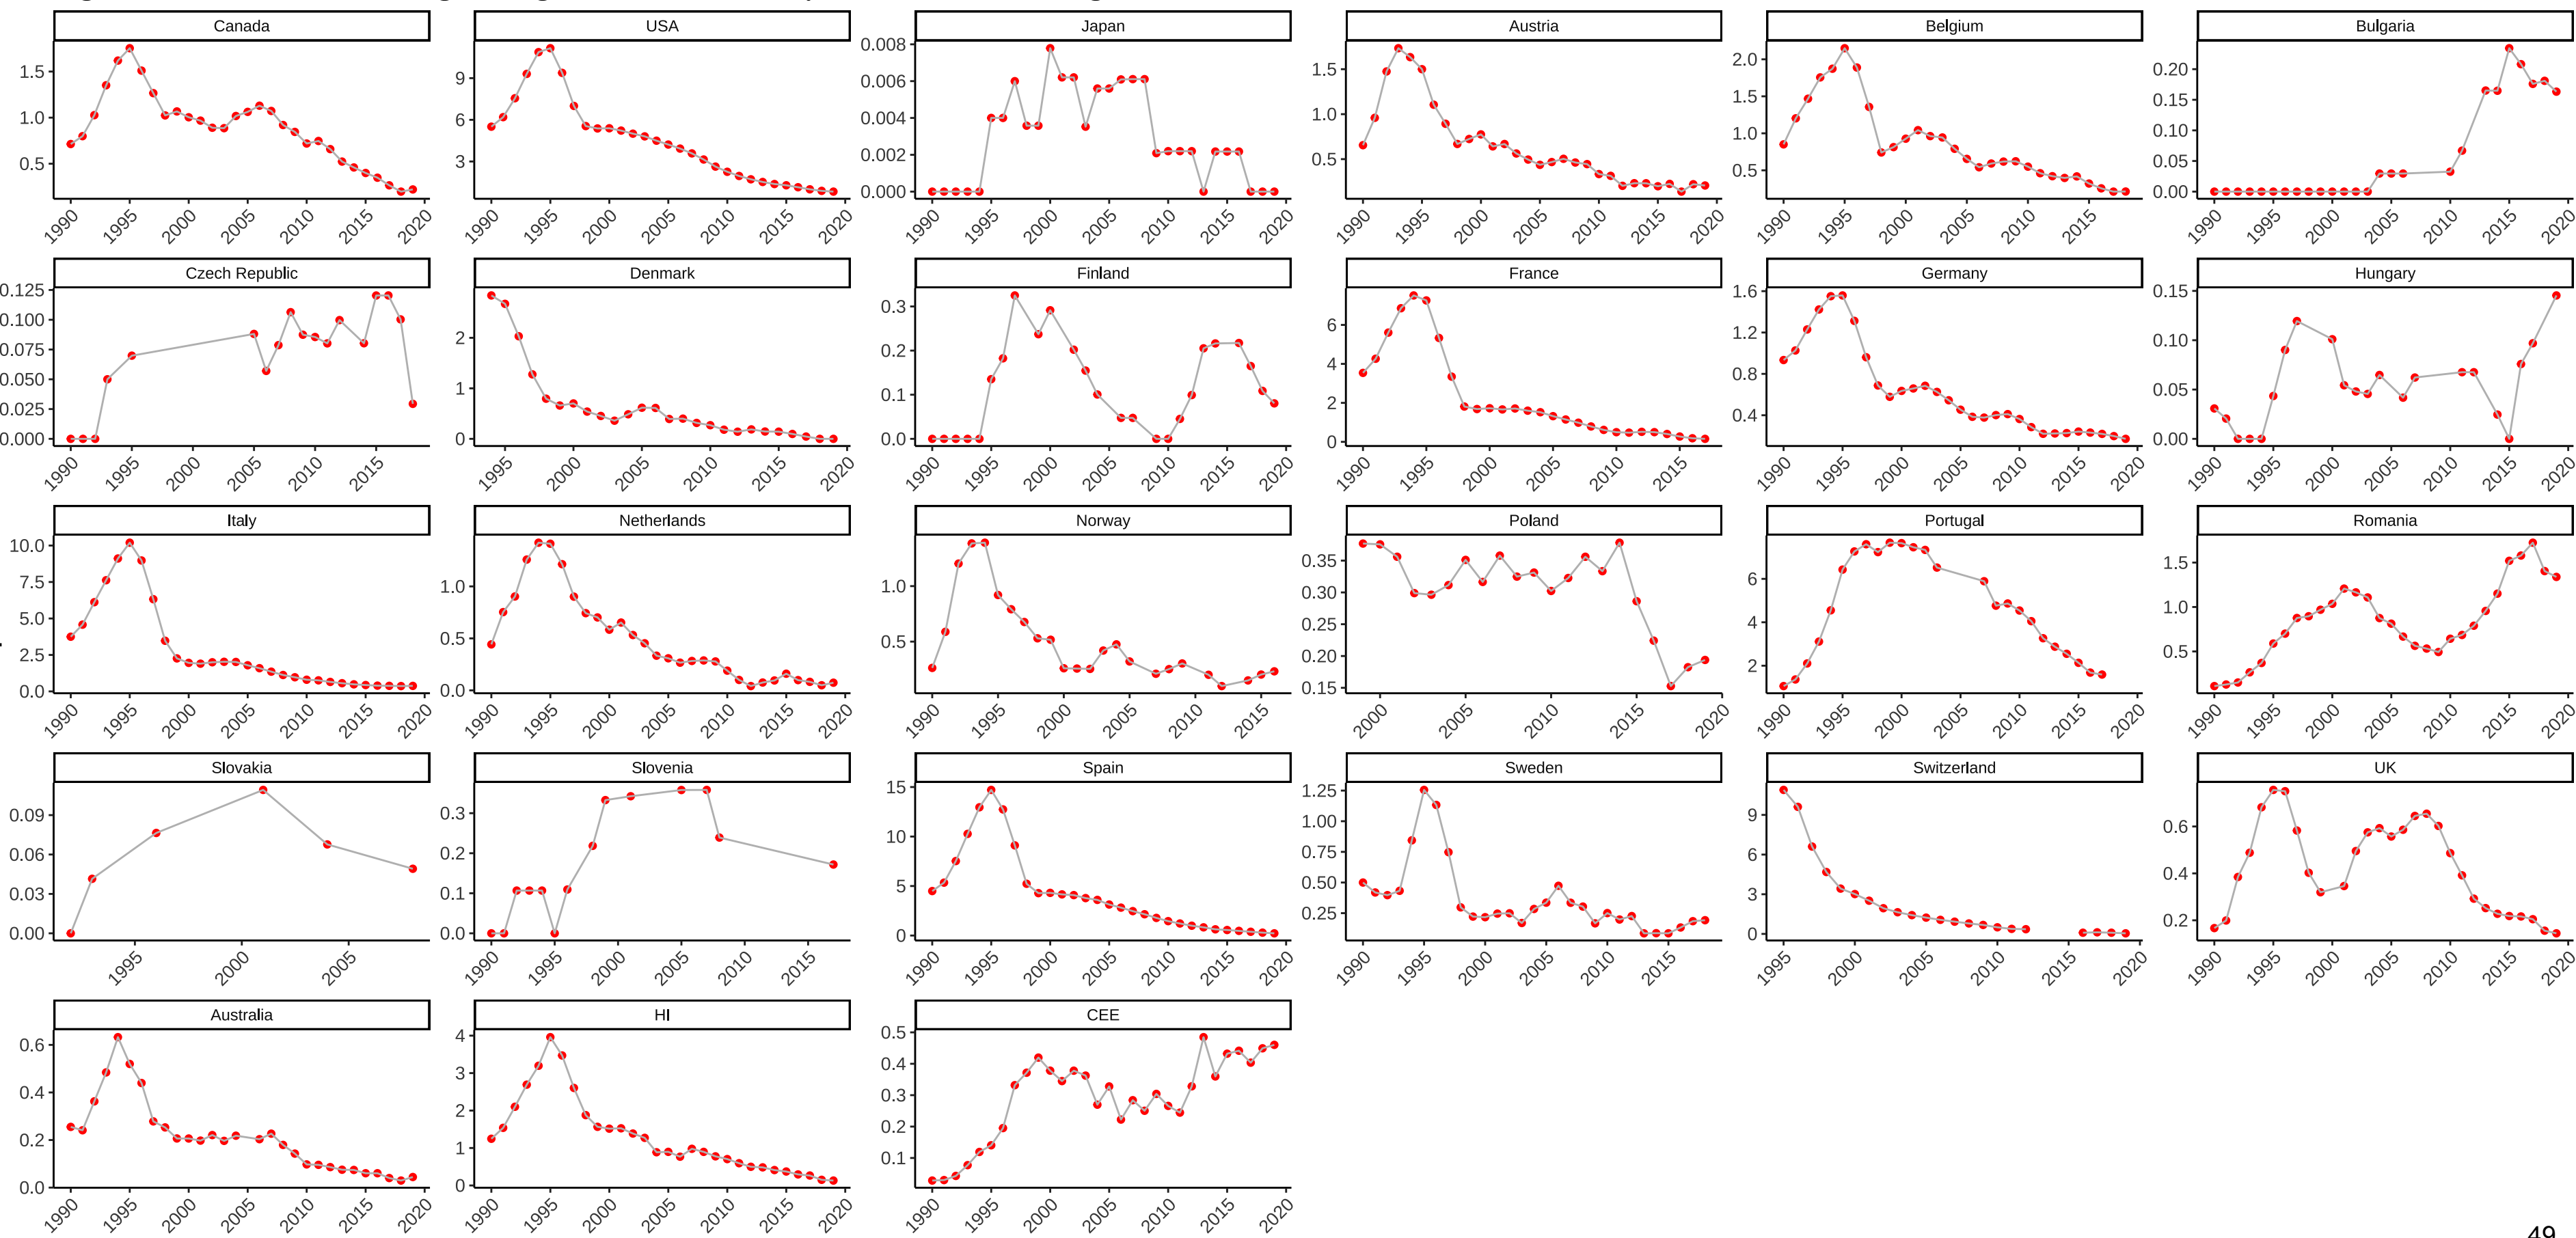

Year

**Figure S43. Three-Year Moving Average of Male Mortality from Respiratory Diseases at Ages 25-44**

Deaths per 100,000

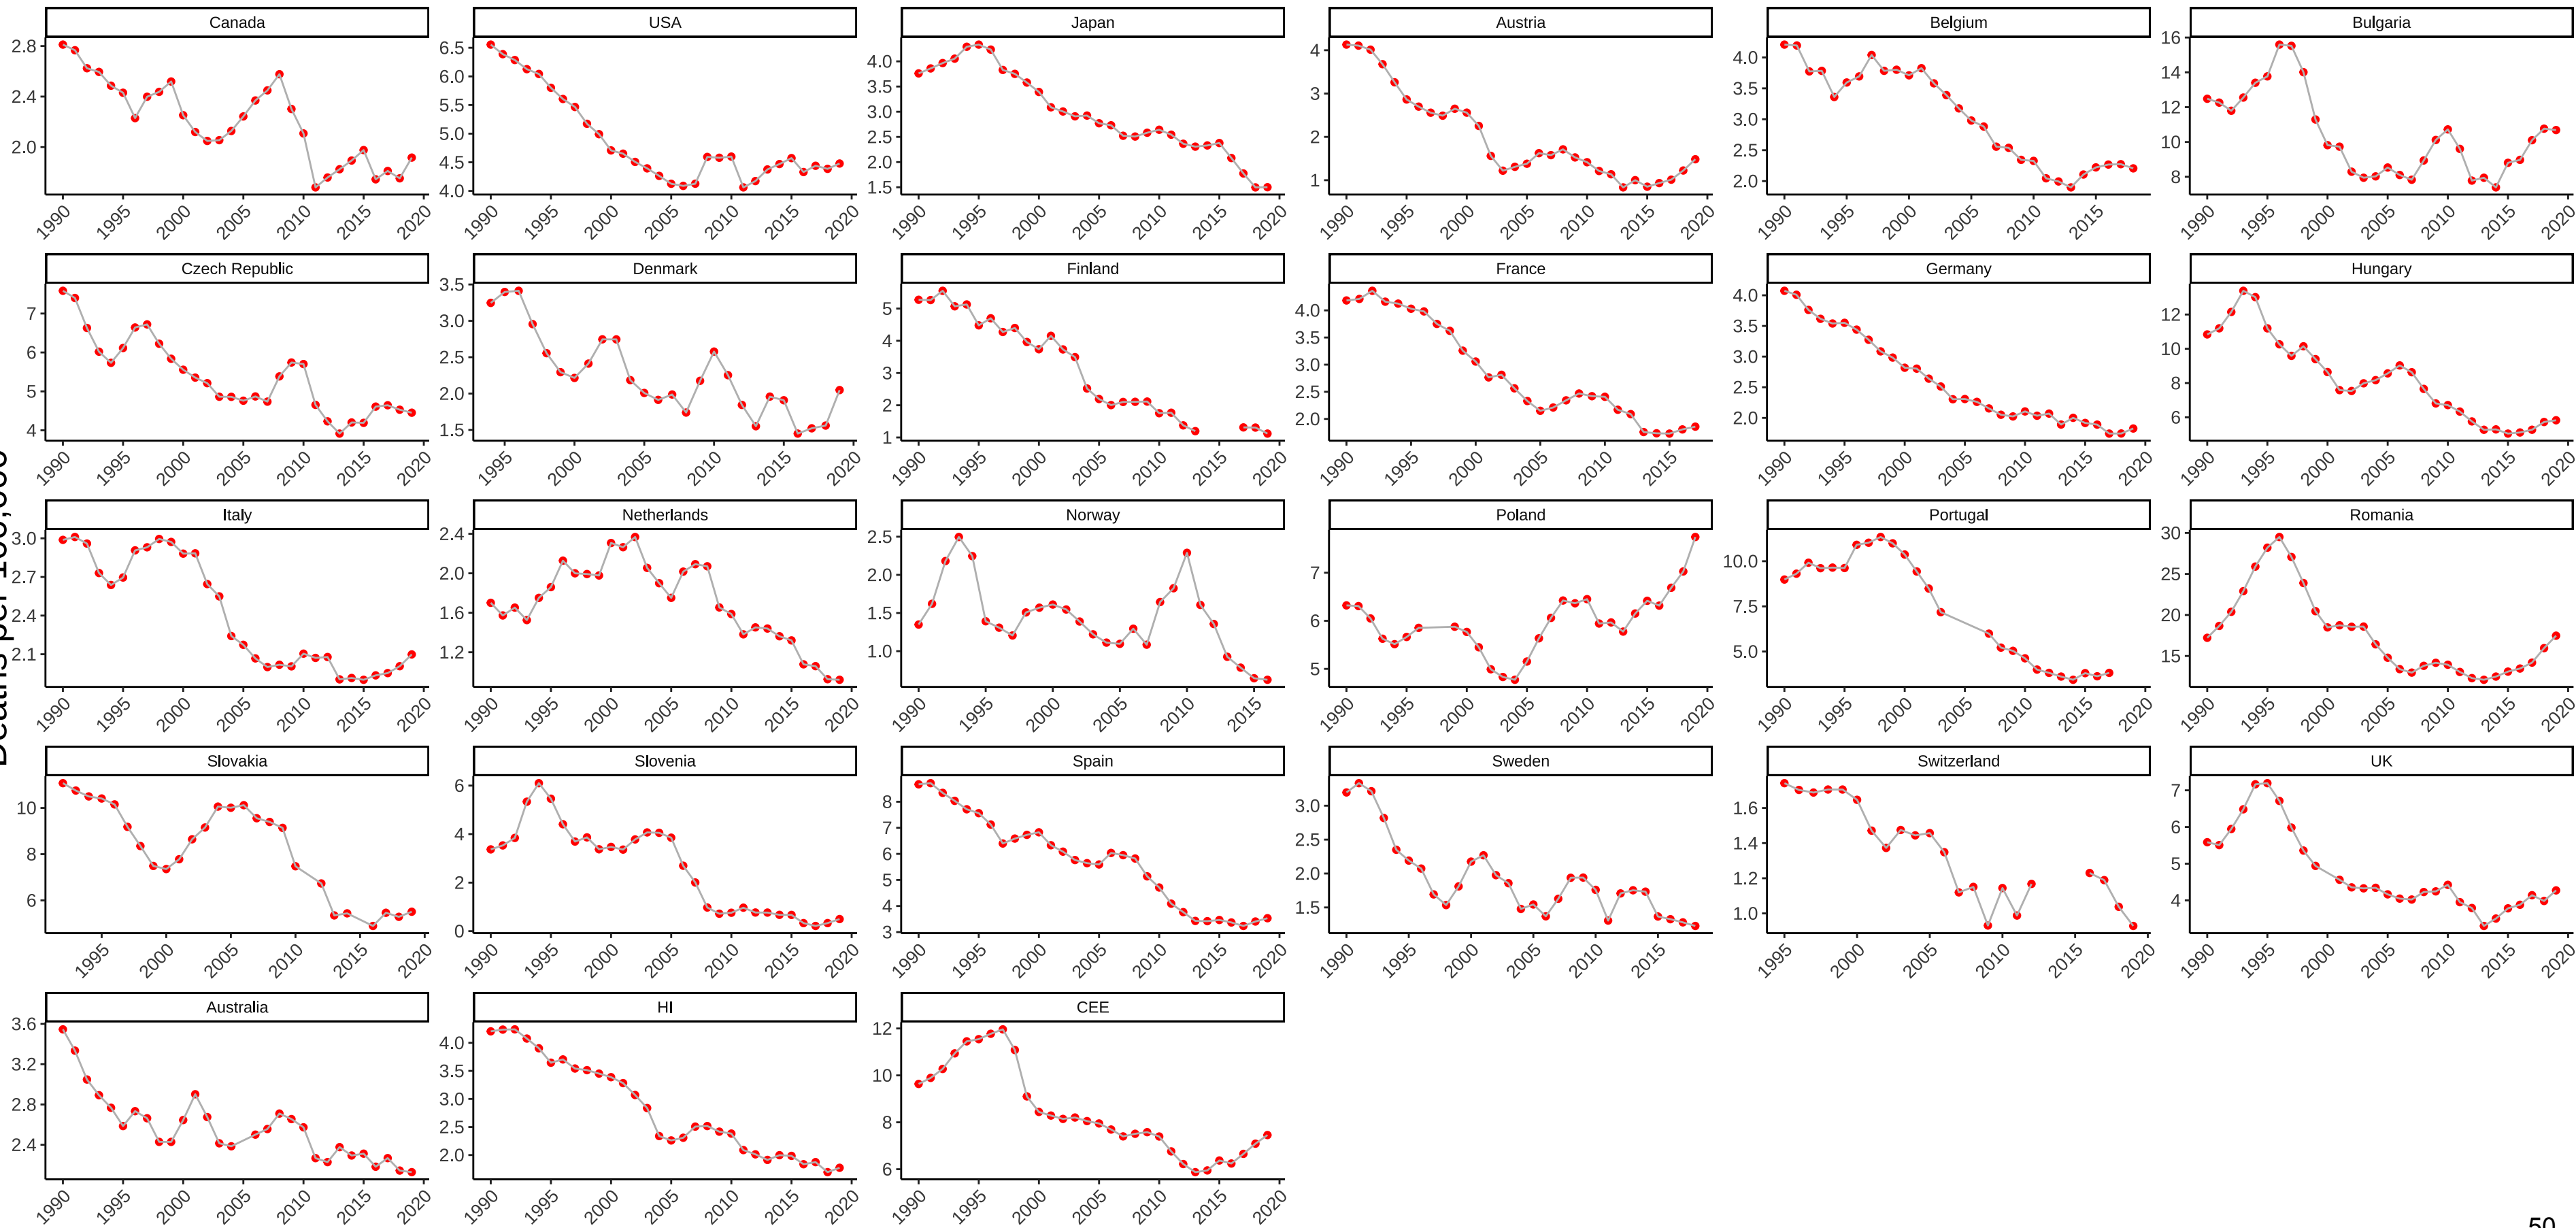

Year

**Figure S44. Three-Year Moving Average of Female Mortality from Respiratory Diseases at Ages 25-44**

Deaths per 100,000

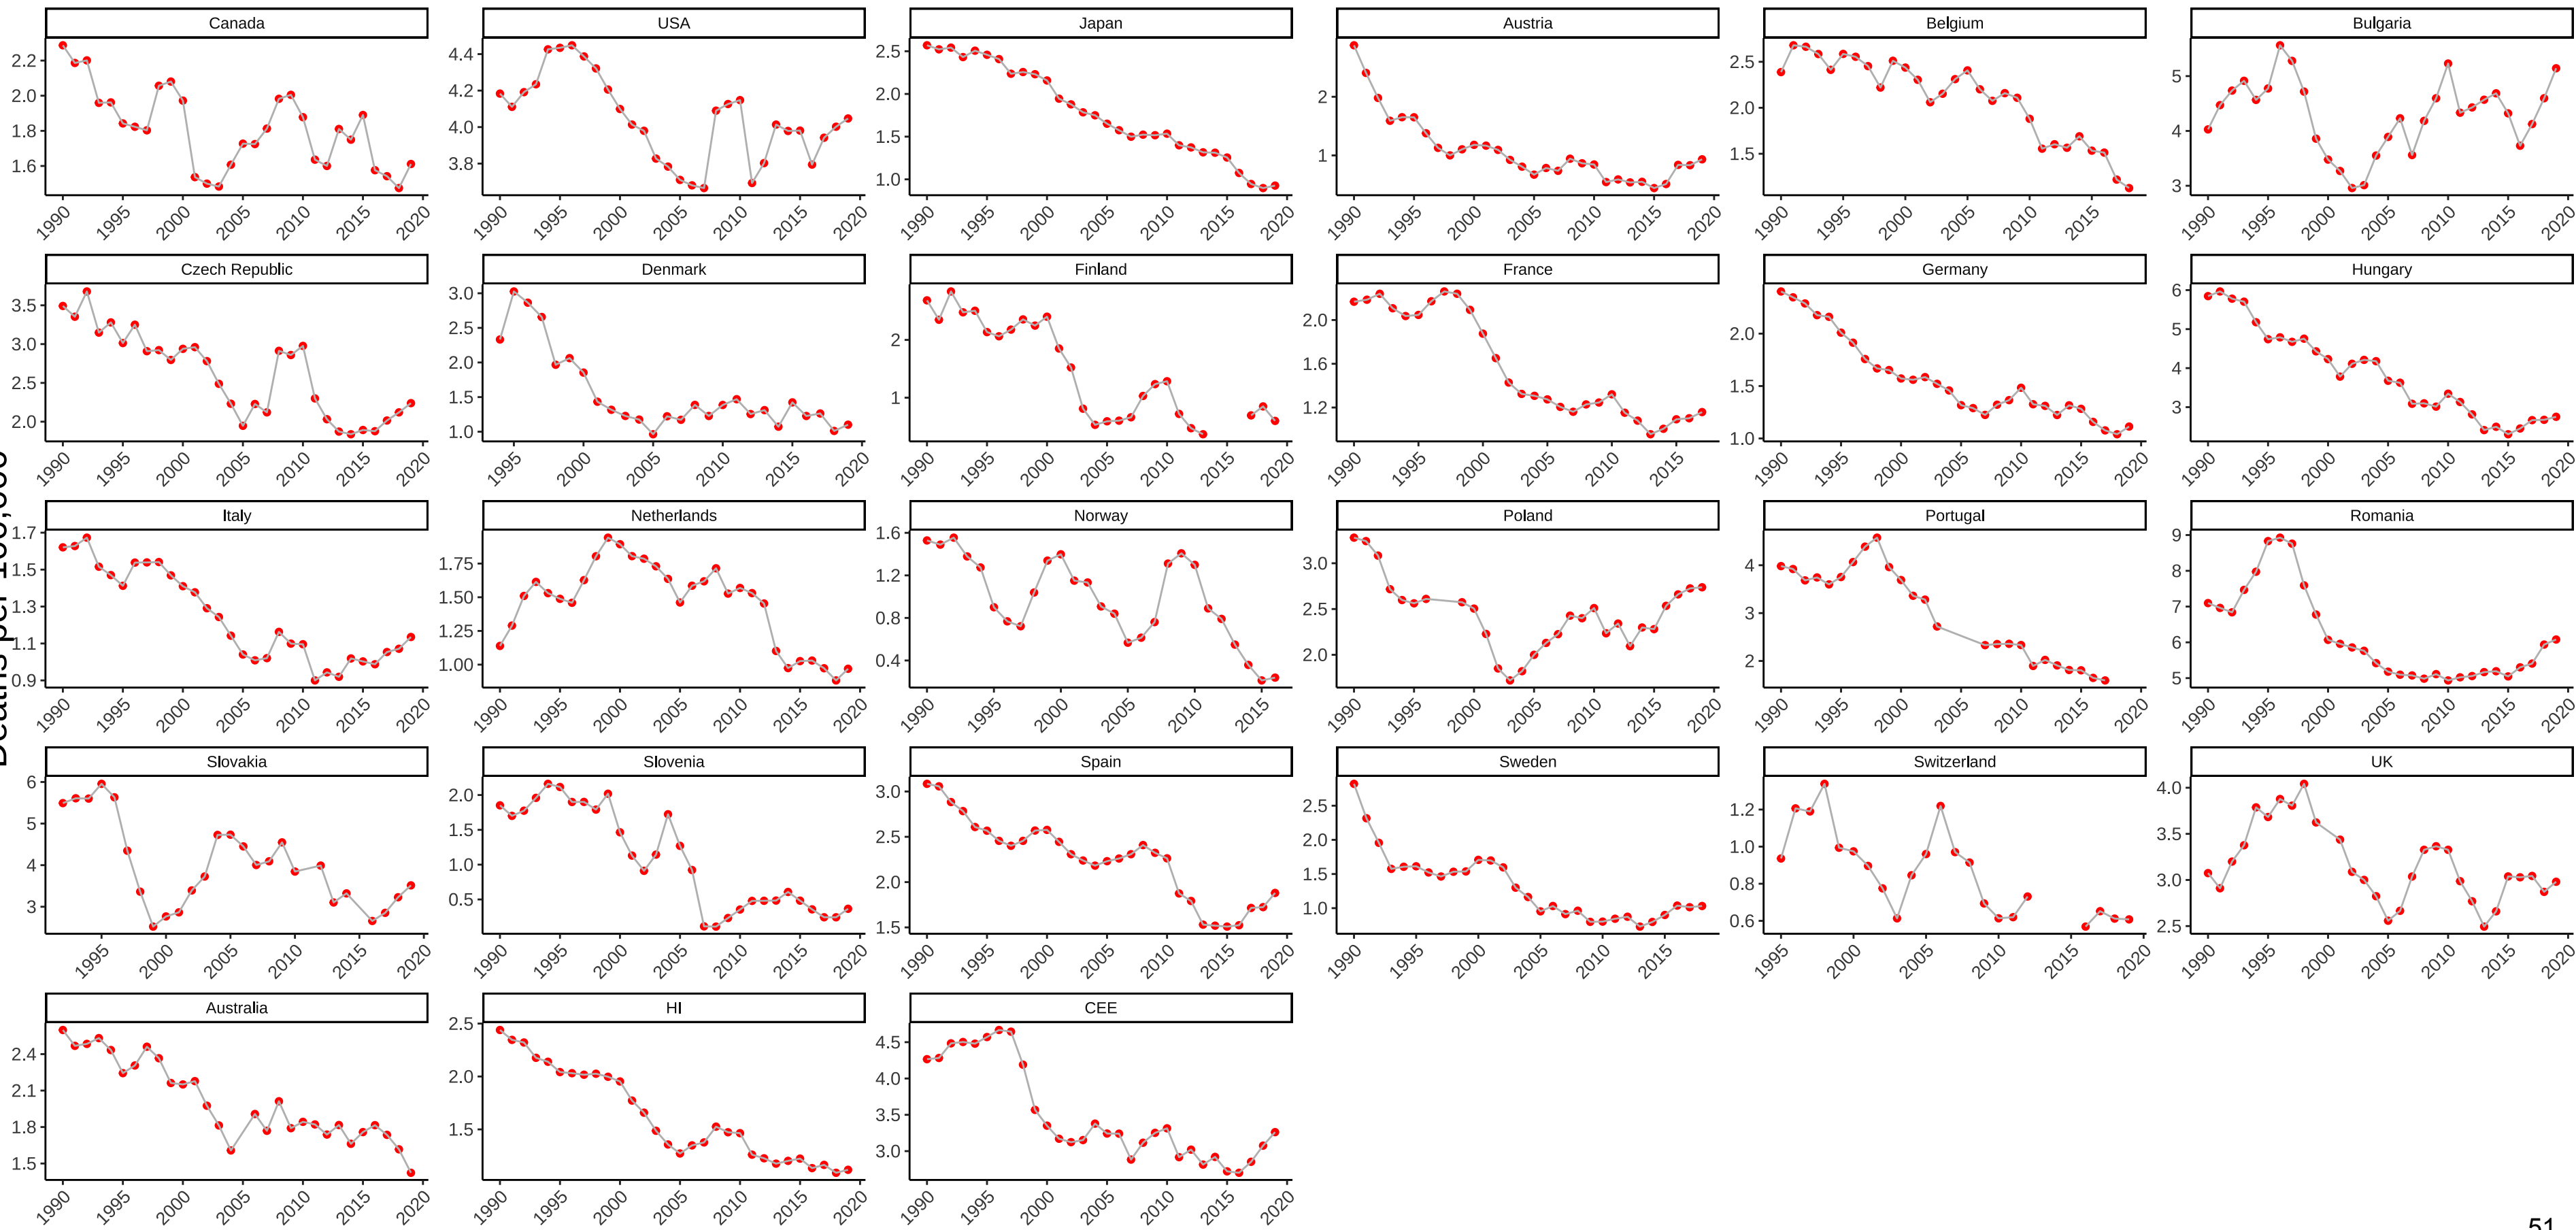

Year

**Figure S45. Three-Year Moving Average of Male Mortality from Trachea/Bronchus, Lung Cancers at Ages 25-44**

Deaths per 100,000

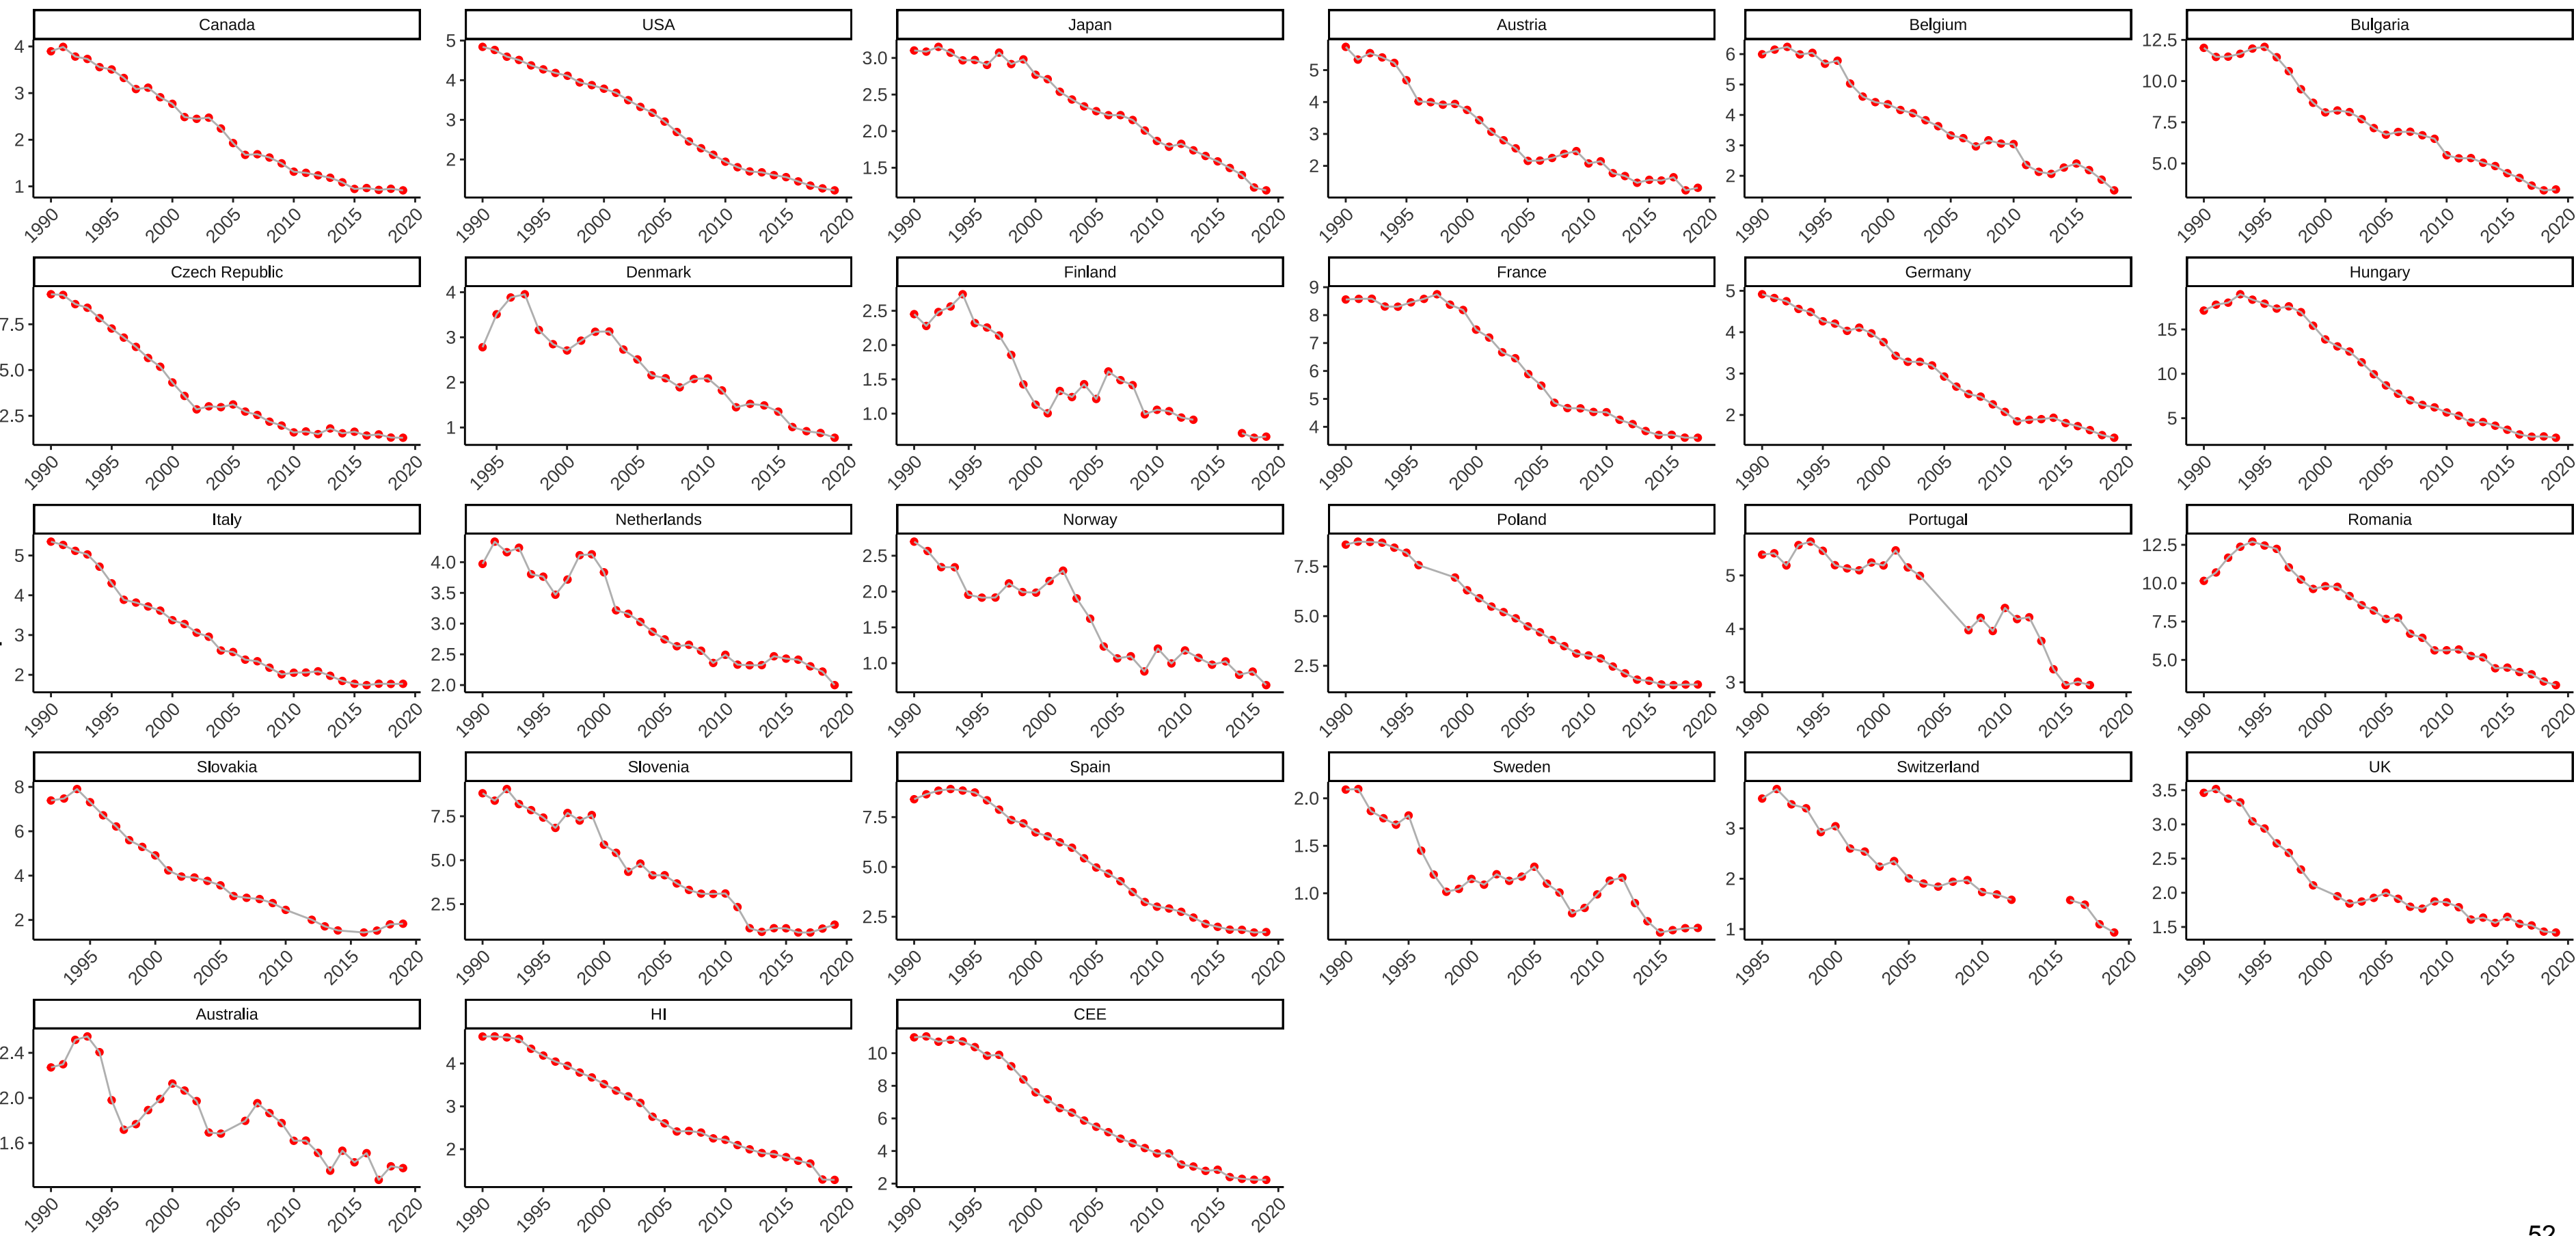

Year

**Figure S46. Three-Year Moving Average of Female Mortality from Trachea/Bronchus, Lung Cancers at Ages 25-44**

Deaths per 100,000

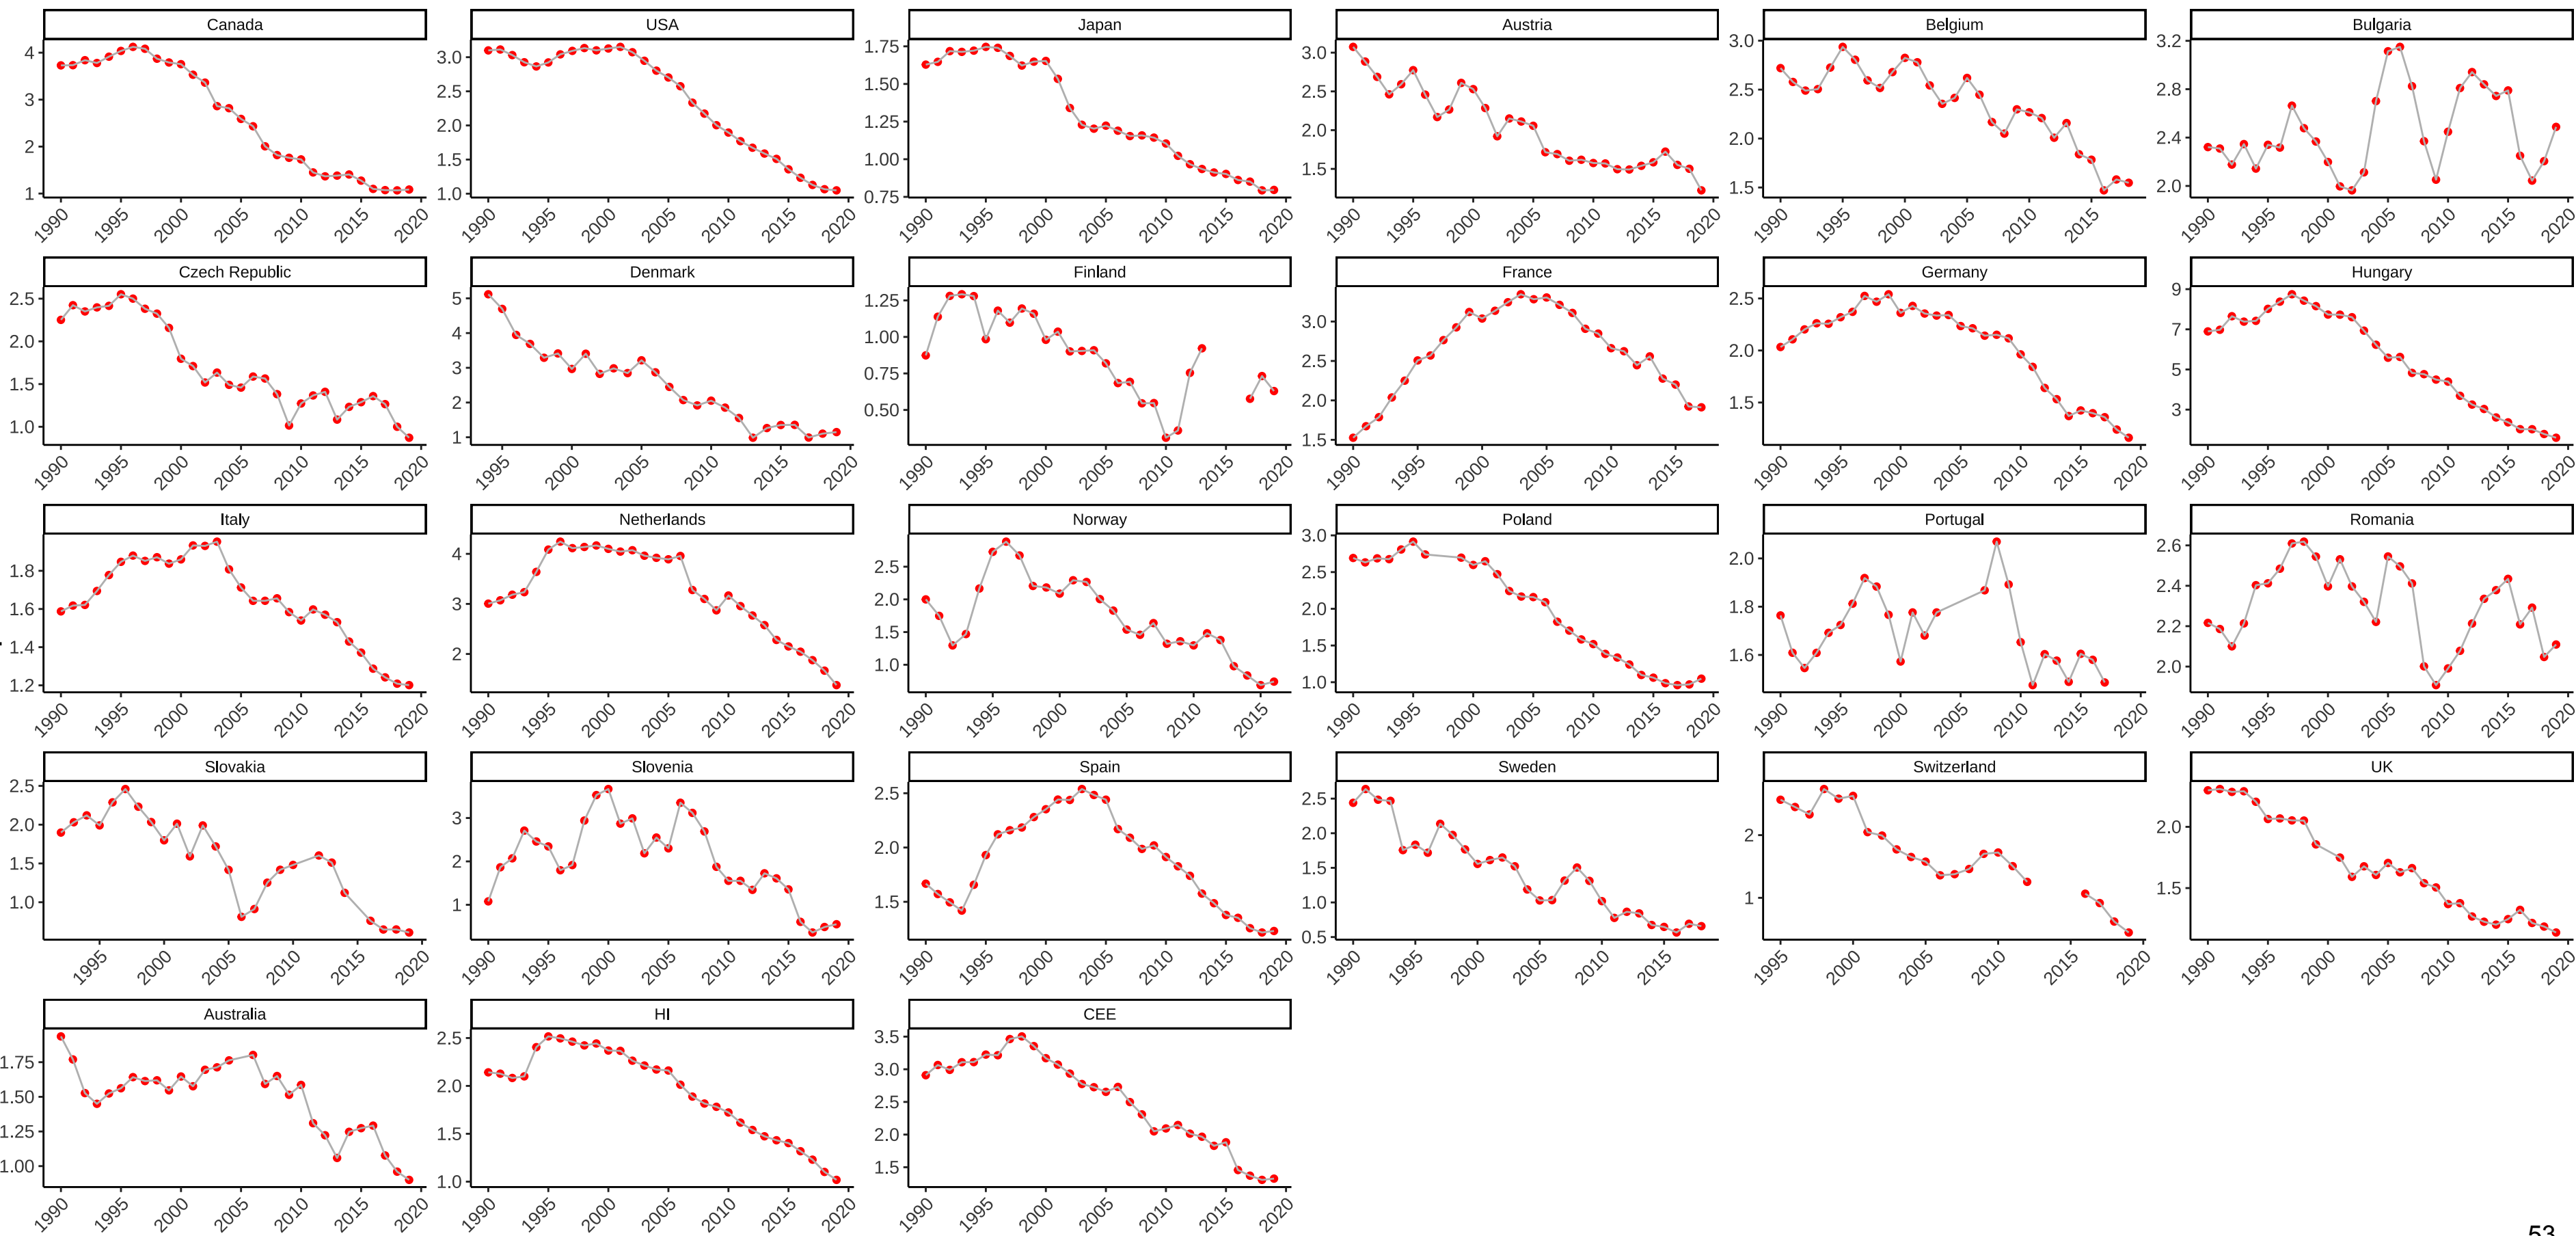

**Figure S47. Three-Year Moving Average of Male Mortality from All Other Cancers at Ages 25-44**

Deaths per 100,000

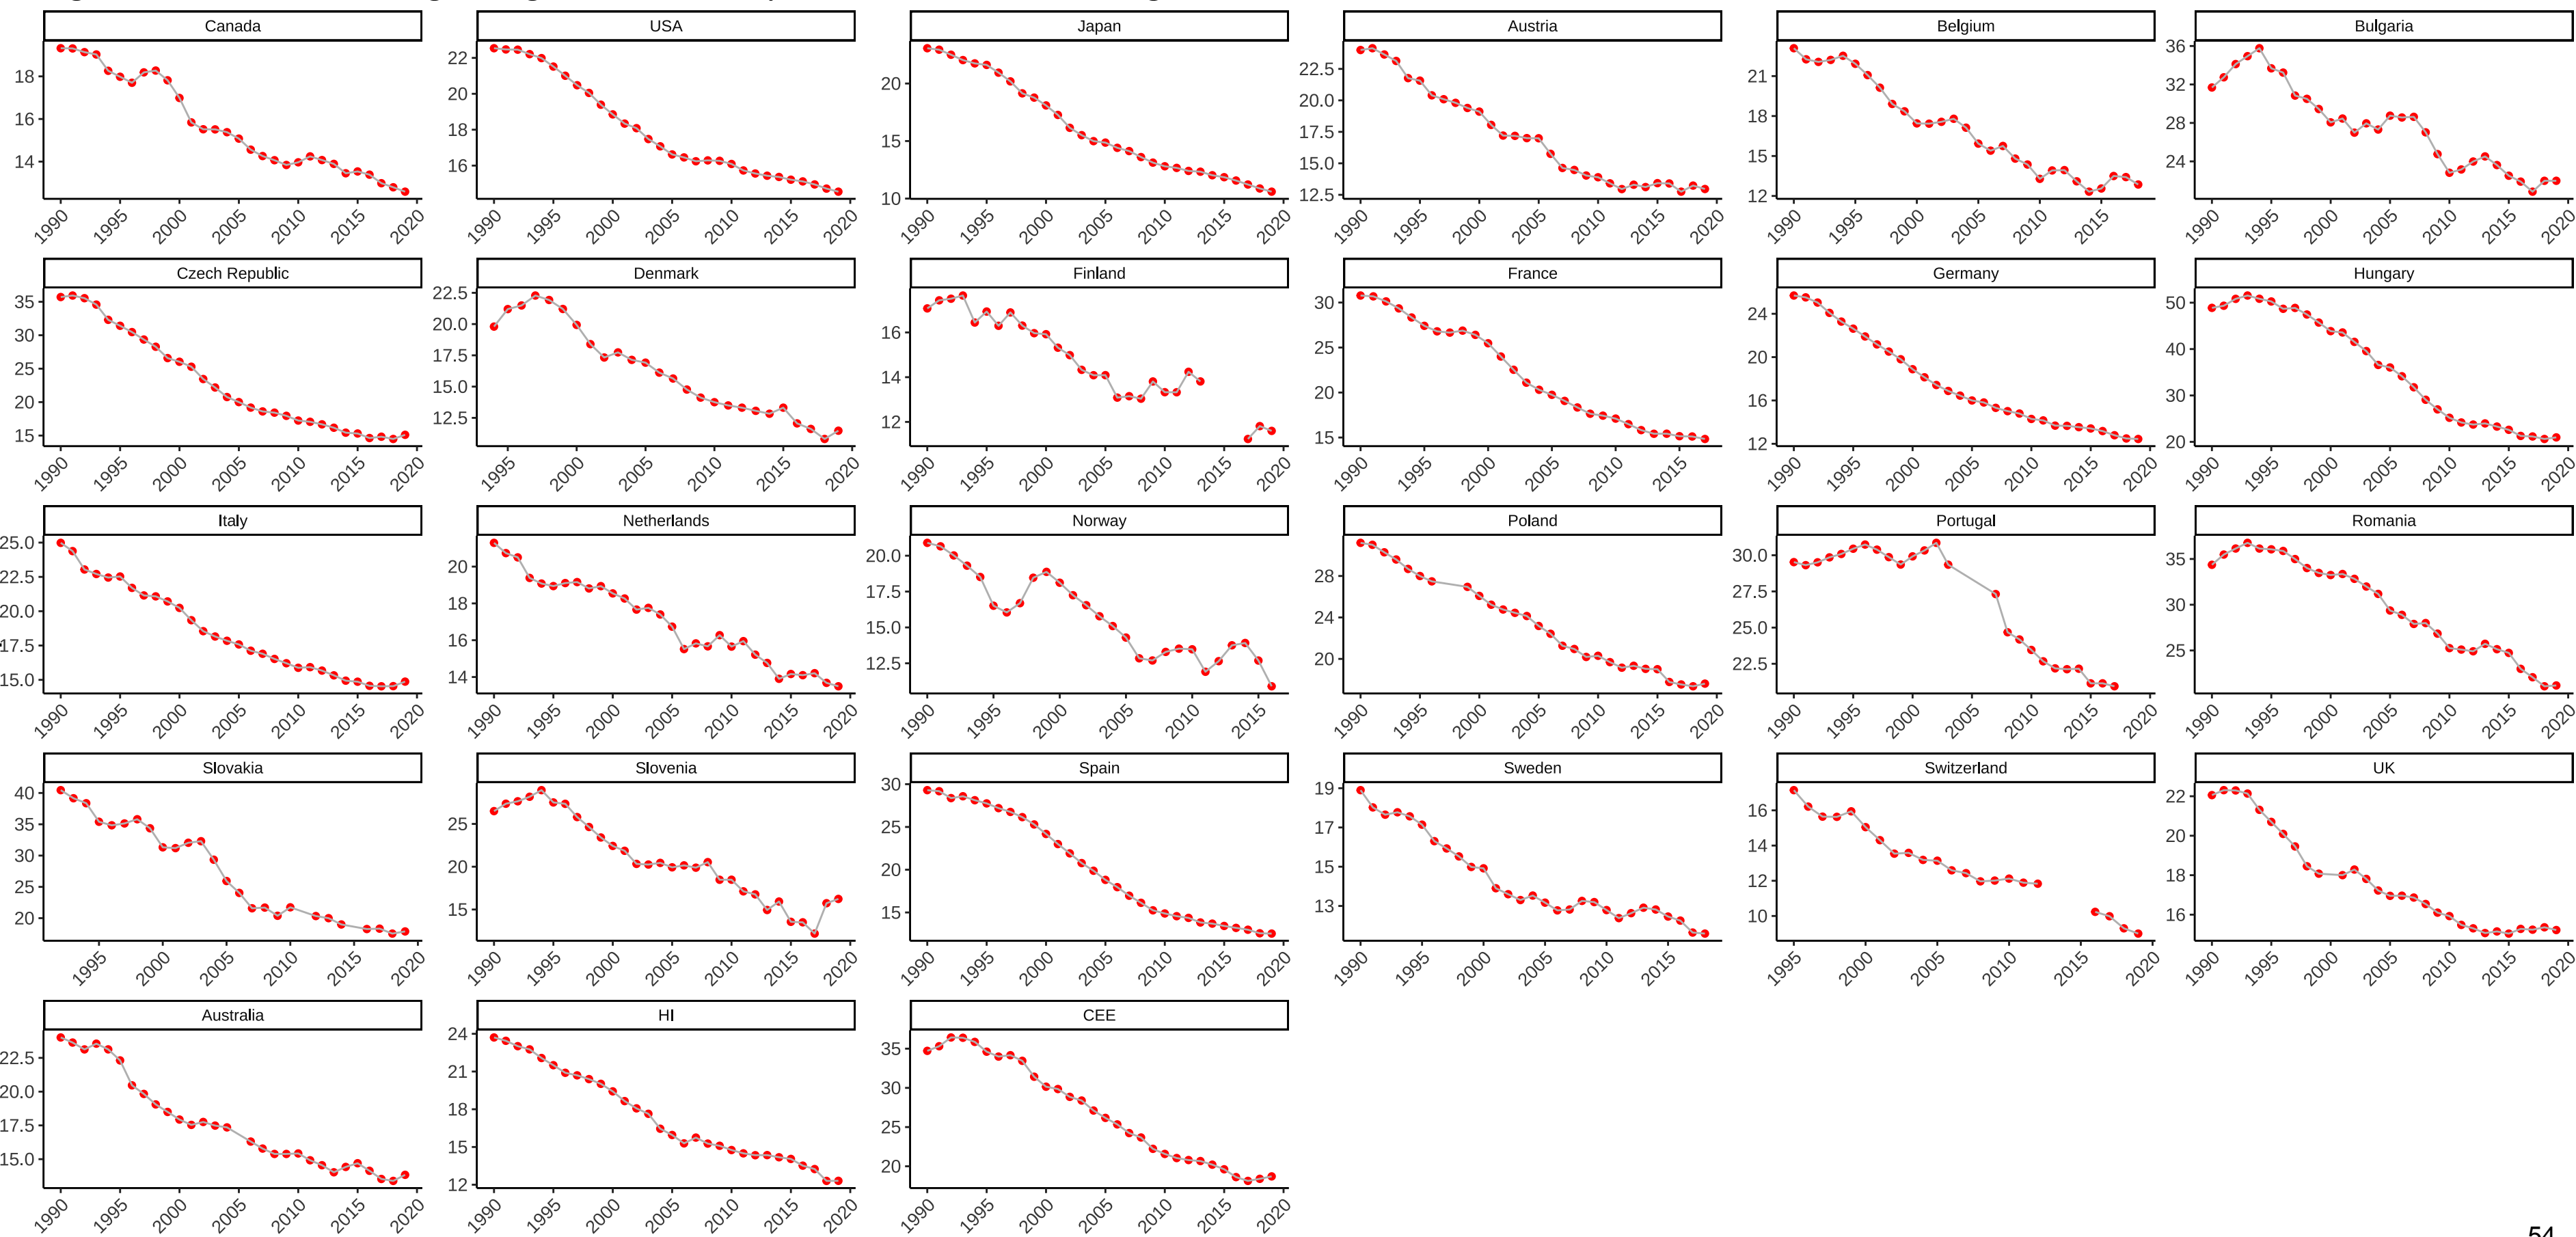

Year

**Figure S48. Three-Year Moving Average of Female Mortality from All Other Cancers at Ages 25-44**

Deaths per 100,000

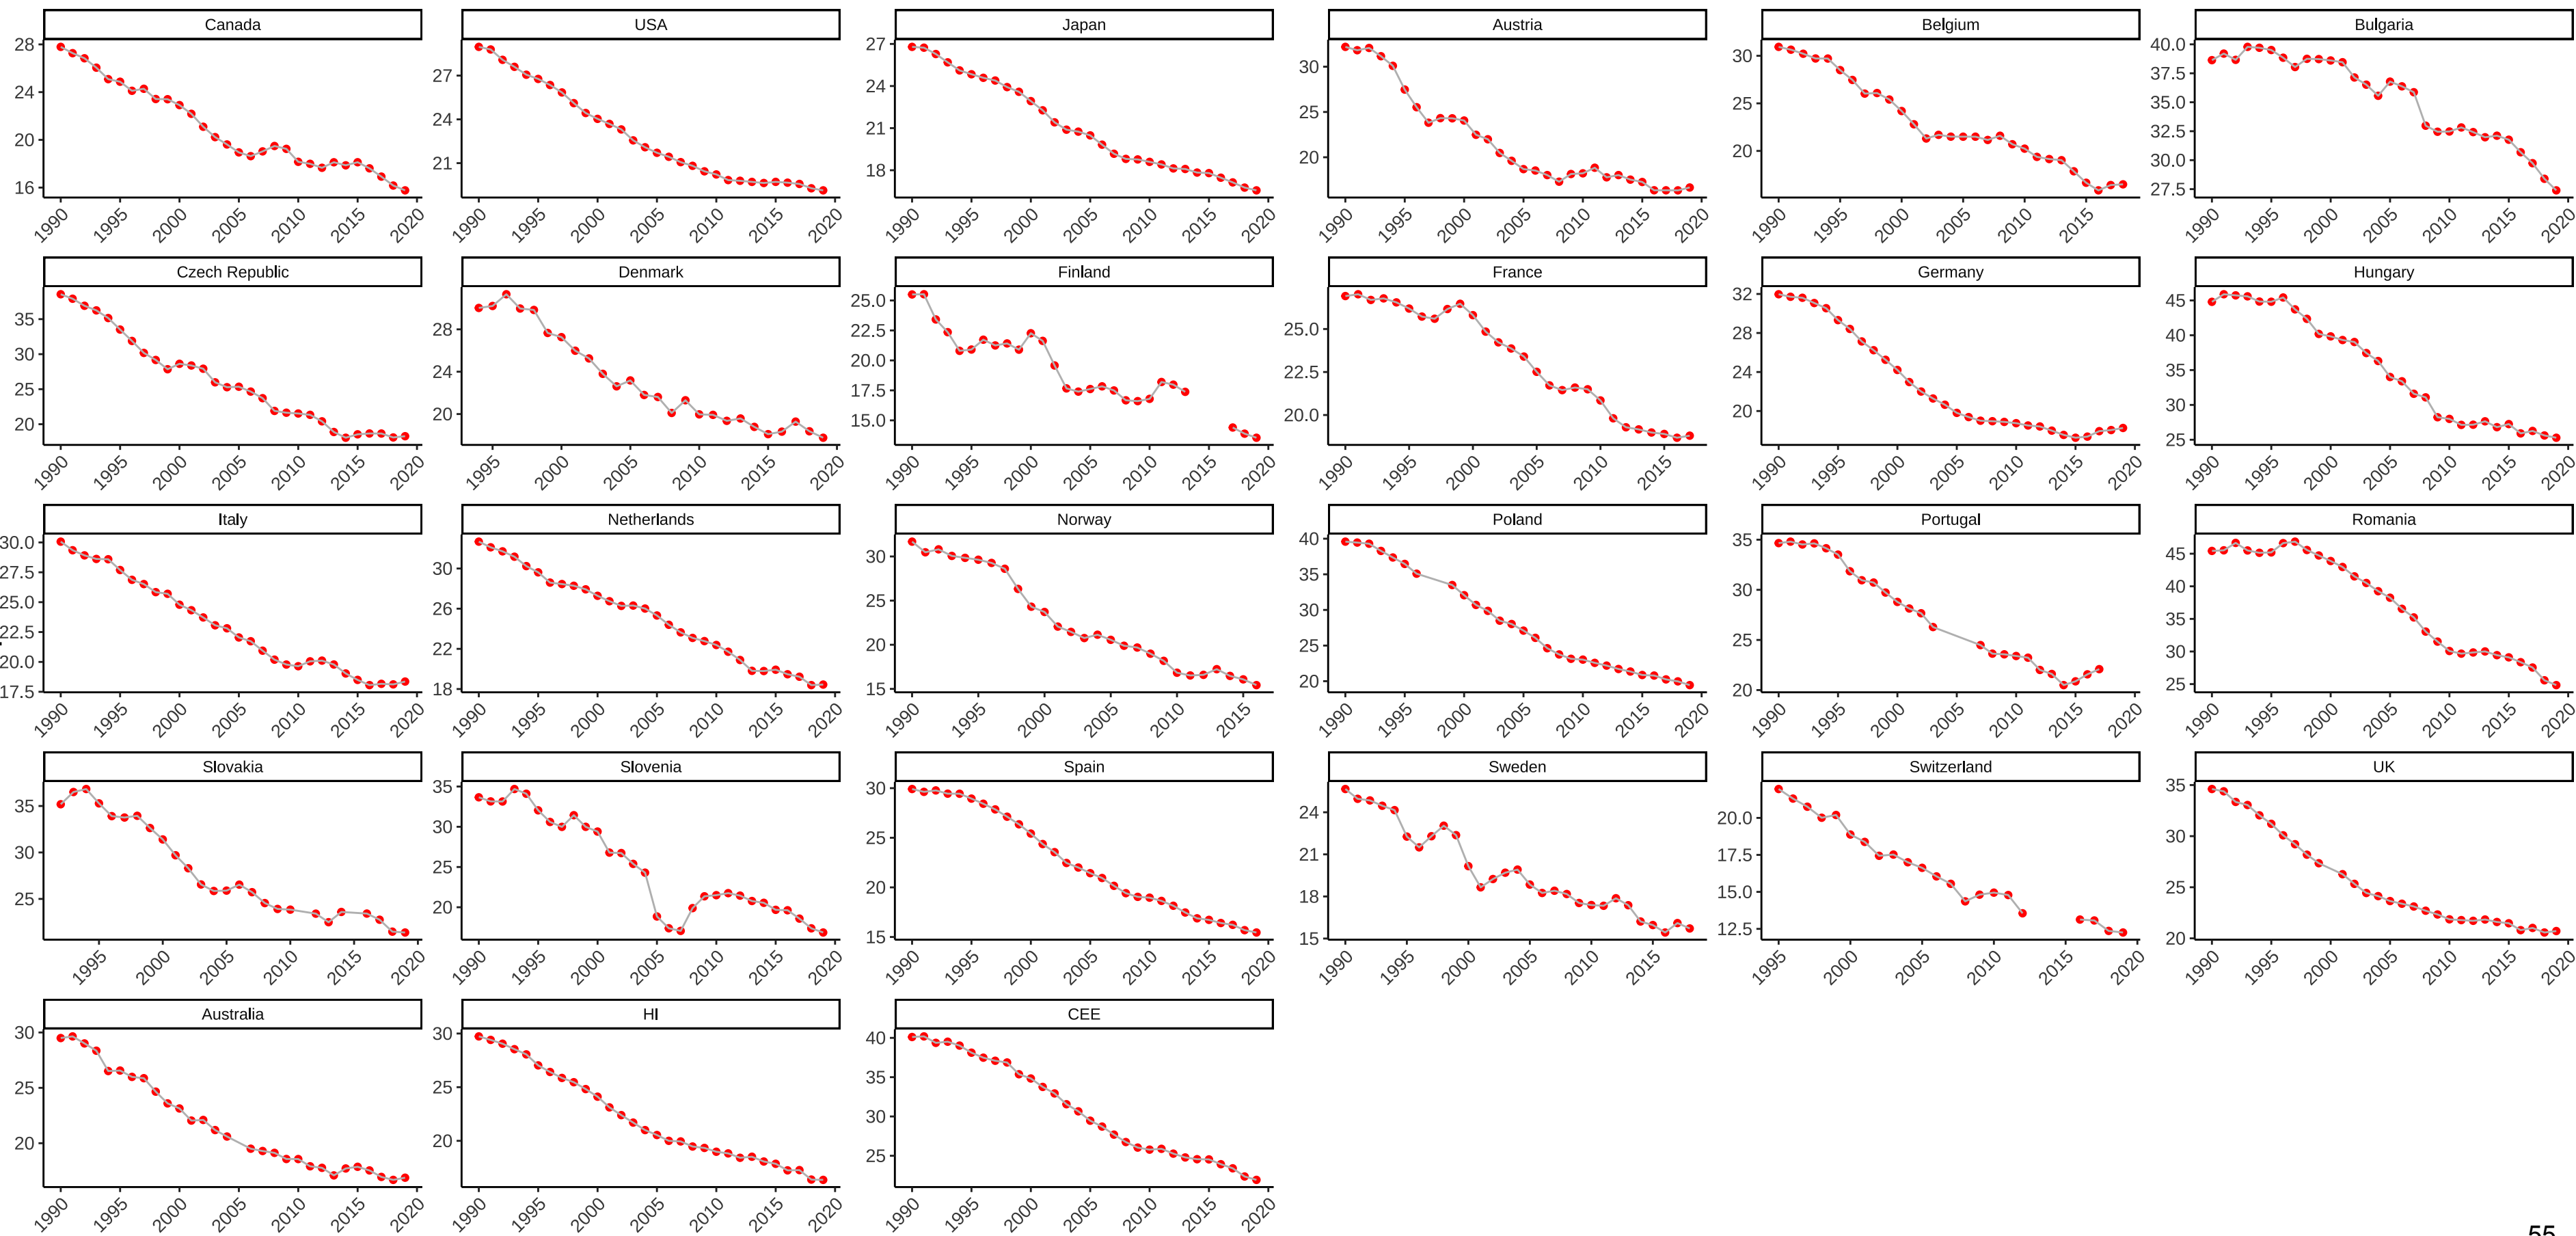

Year

**Figure S49. Three-Year Moving Average of Male Mortality from Nervous System Diseases at Ages 25-44**

Deaths per 100,000

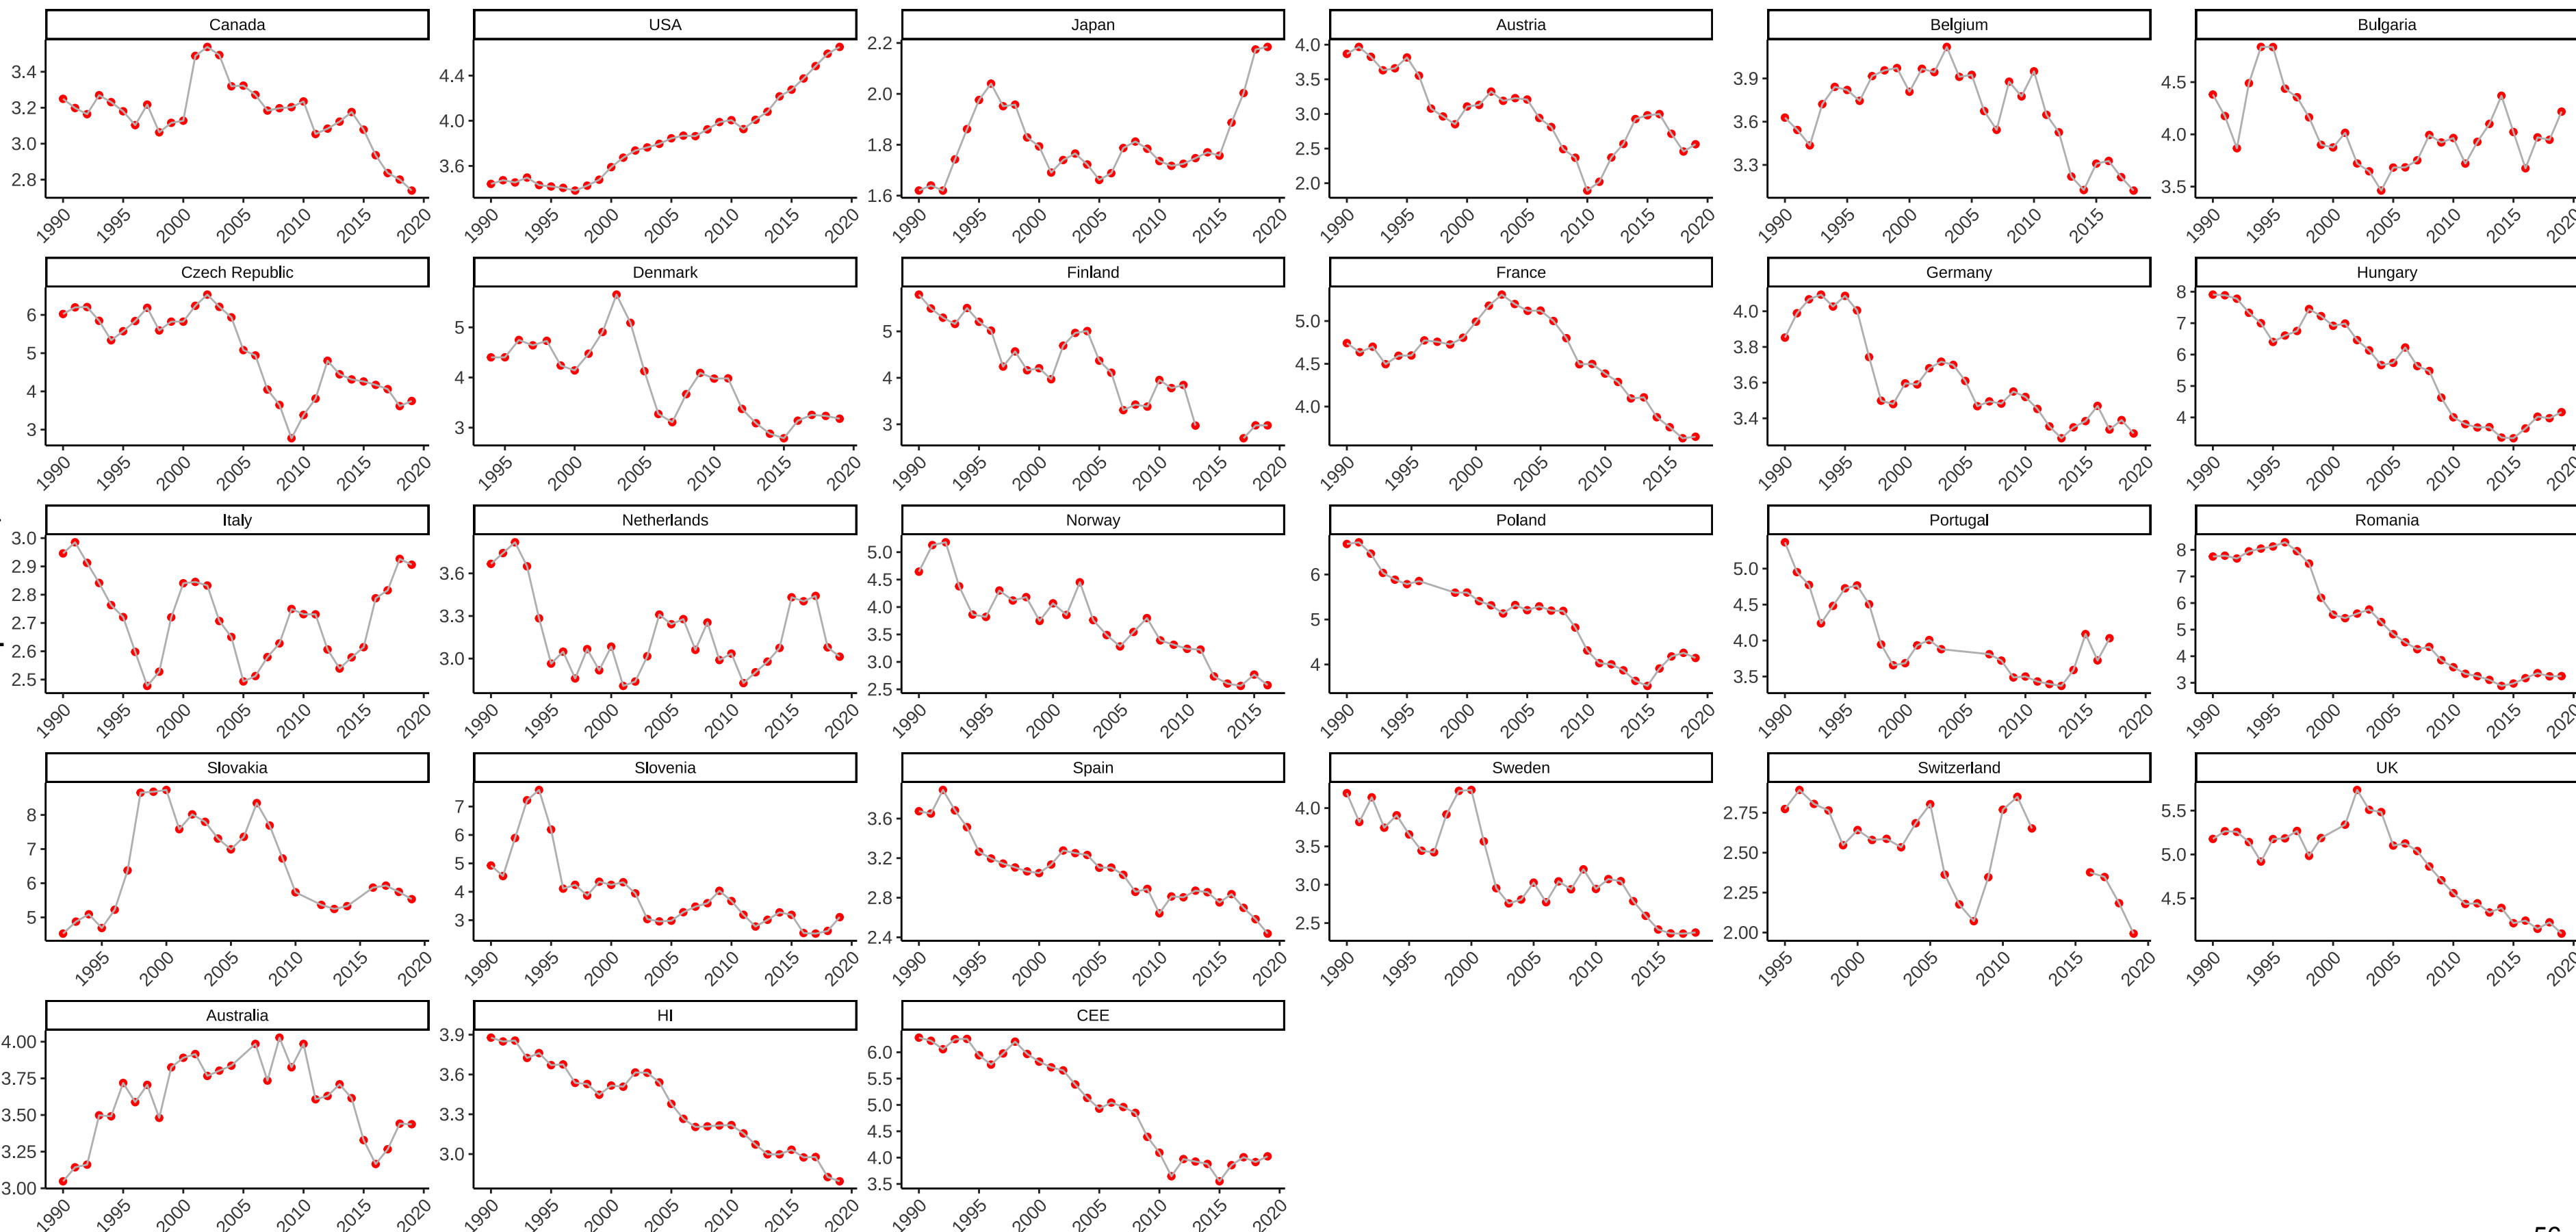

Year

**Figure S50. Three-Year Moving Average of Female Mortality from Nervous System Diseases at Ages 25-44**

Deaths per 100,000

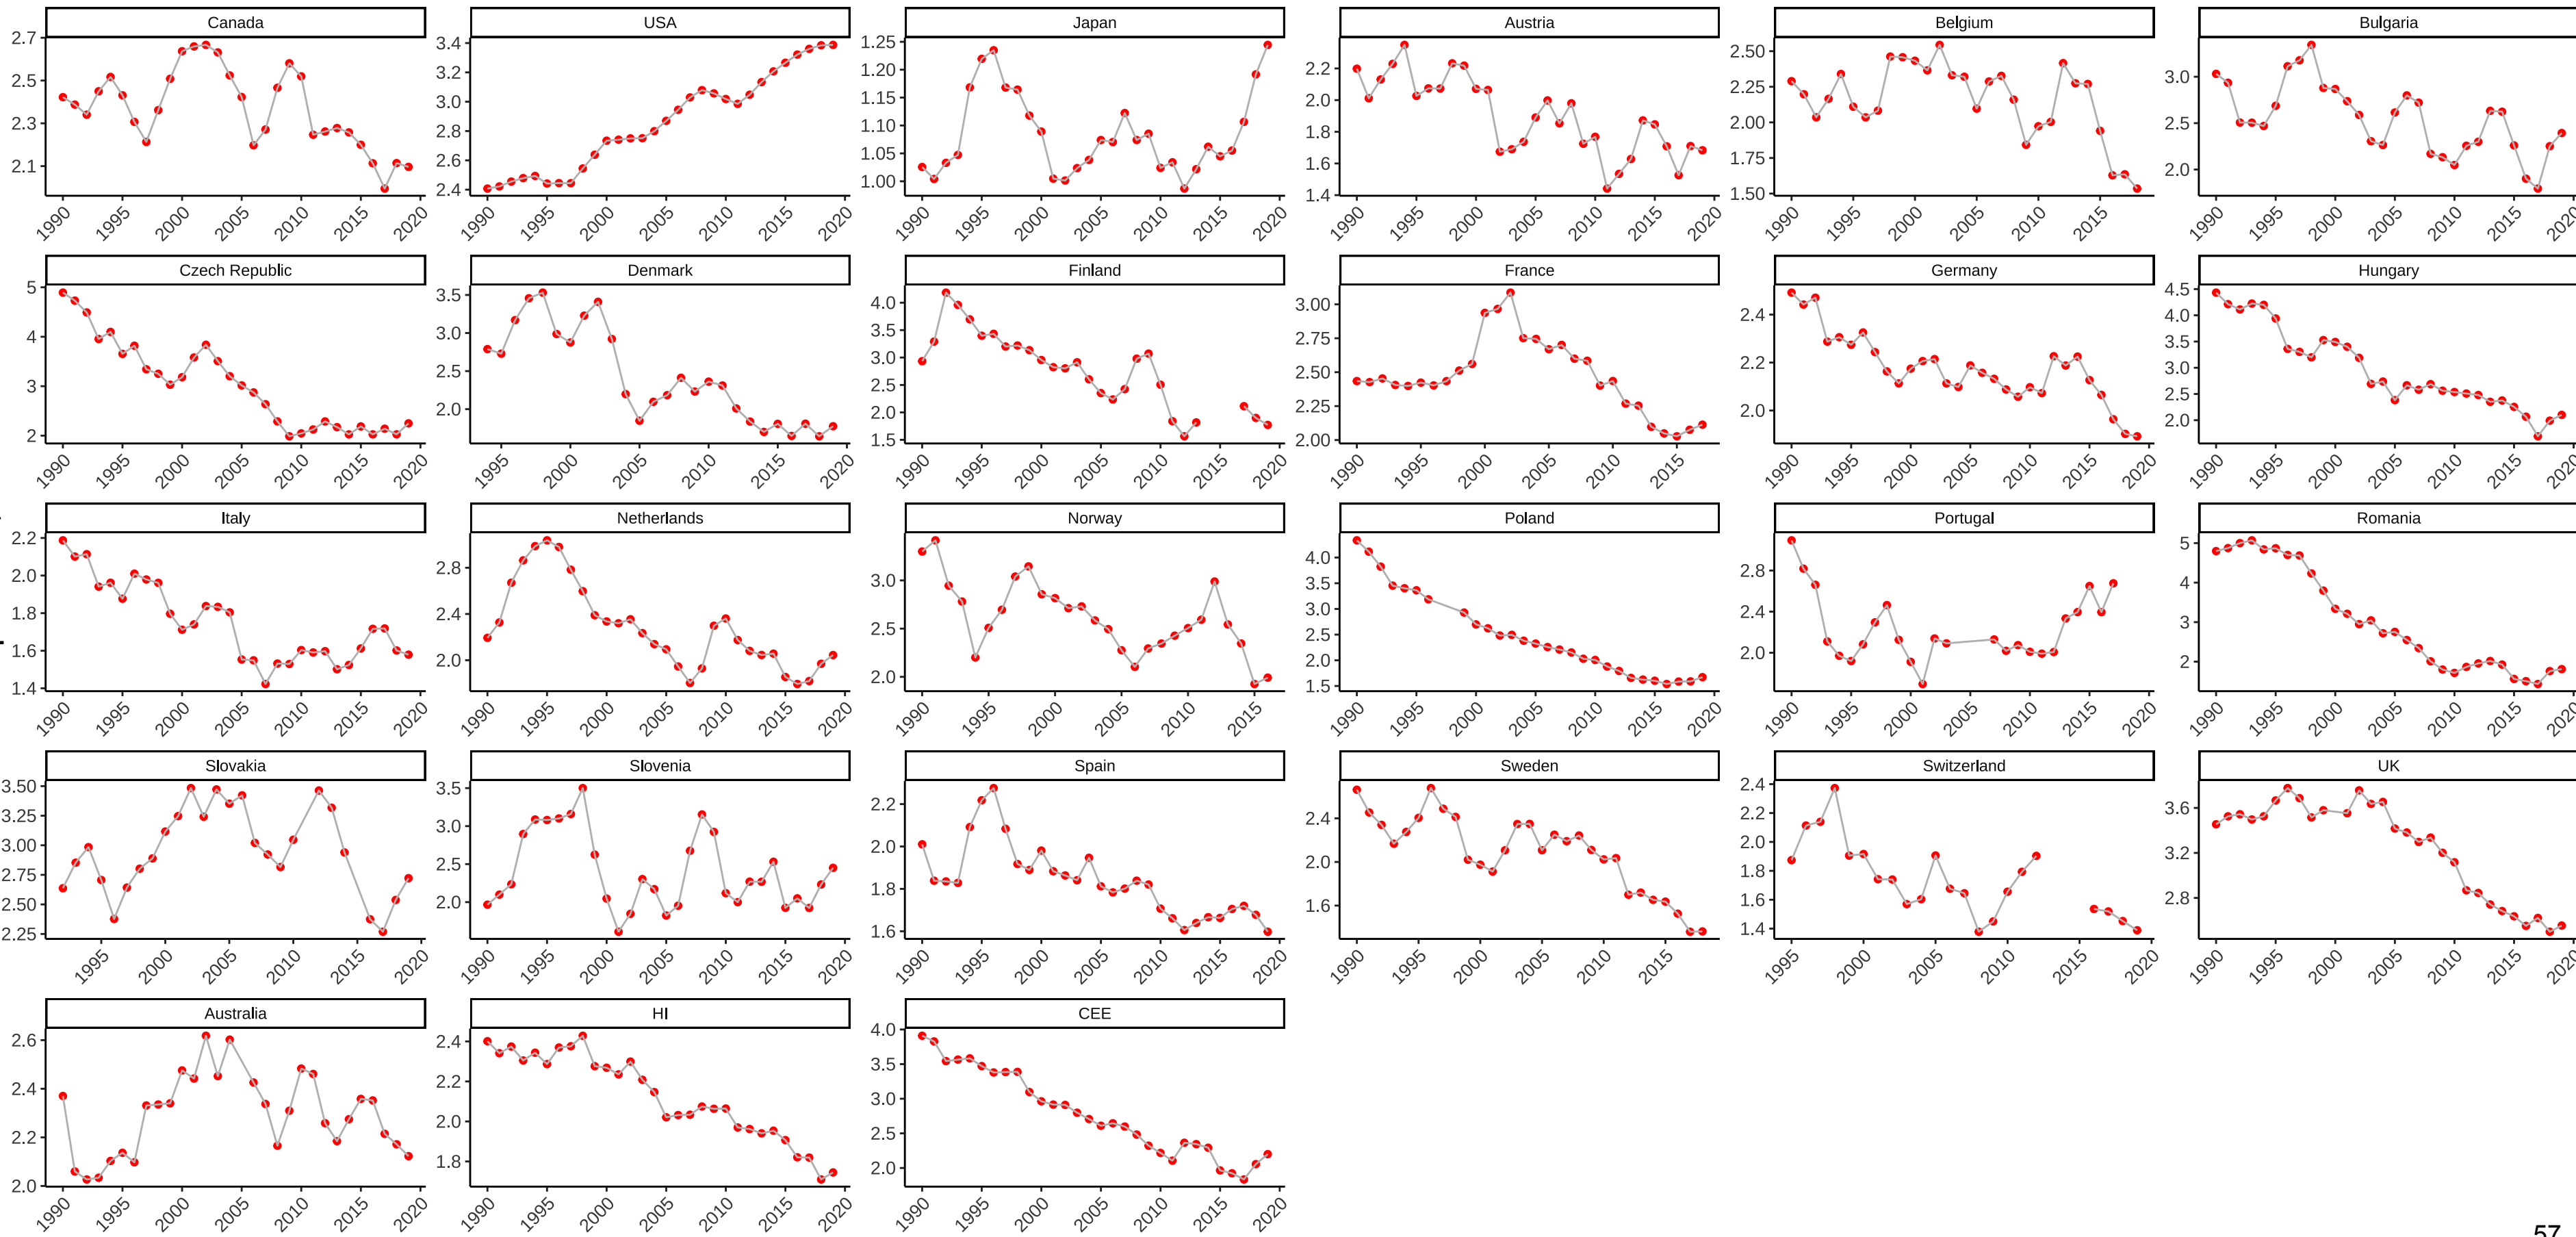

Year

**Figure S51. Three-Year Moving Average of Male Mortality from Metabolic Diseases at Ages 25-44**

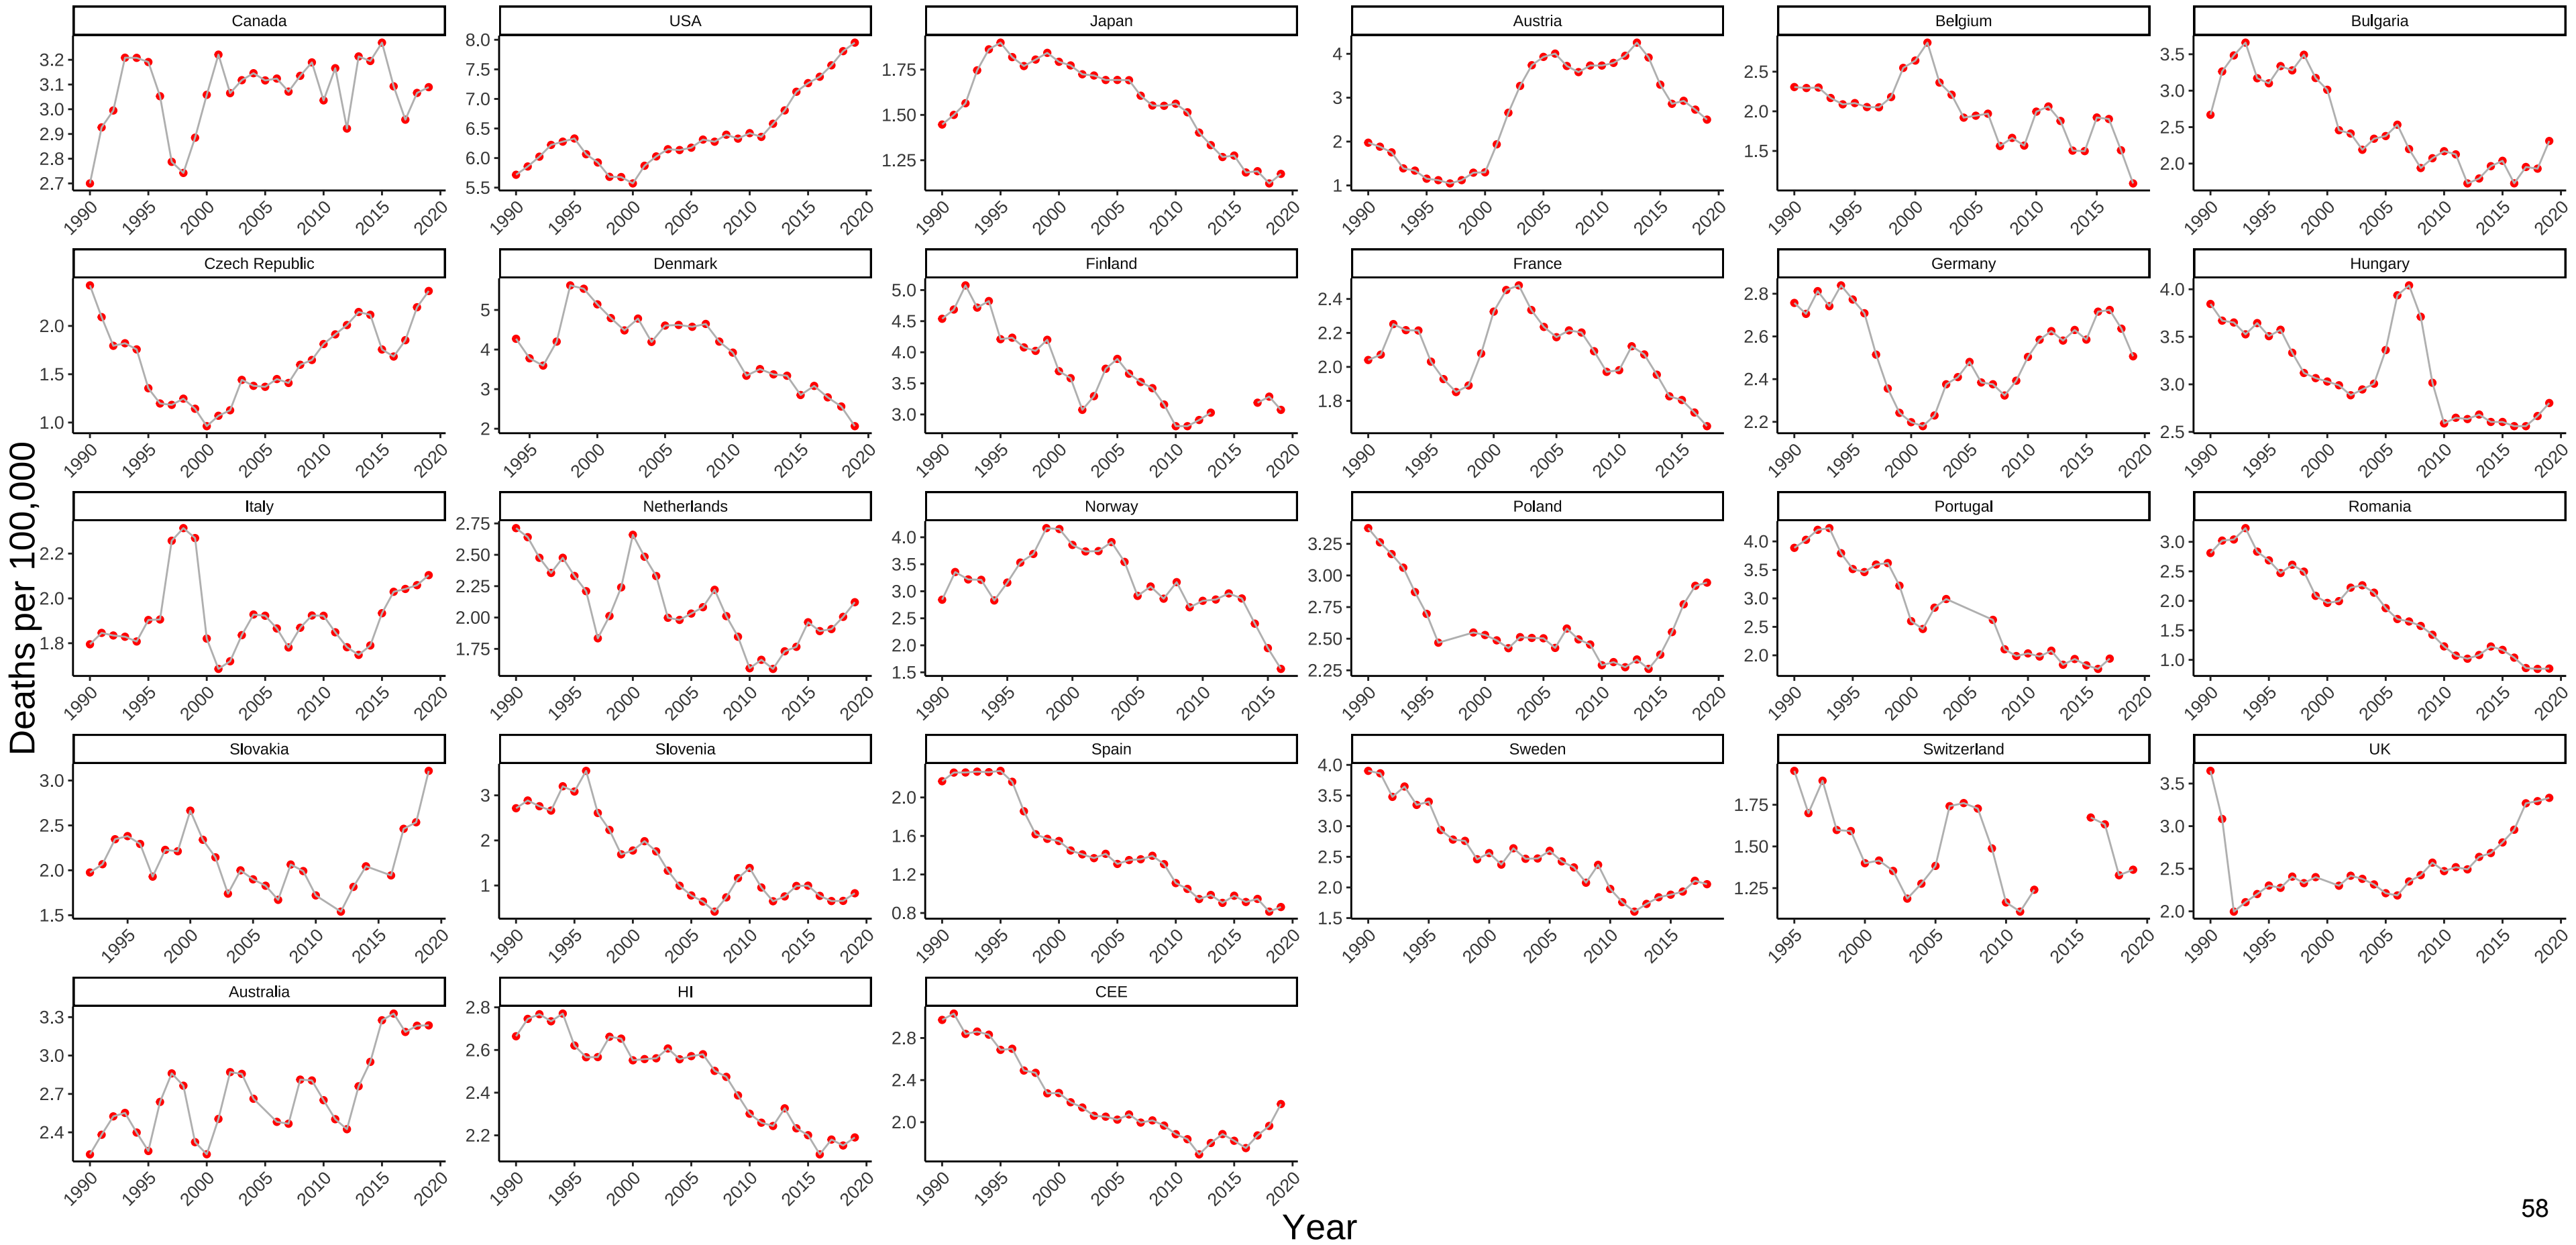

**Figure S52. Three-Year Moving Average of Female Mortality from Metabolic Diseases at Ages 25-44**

Deaths per 100,000

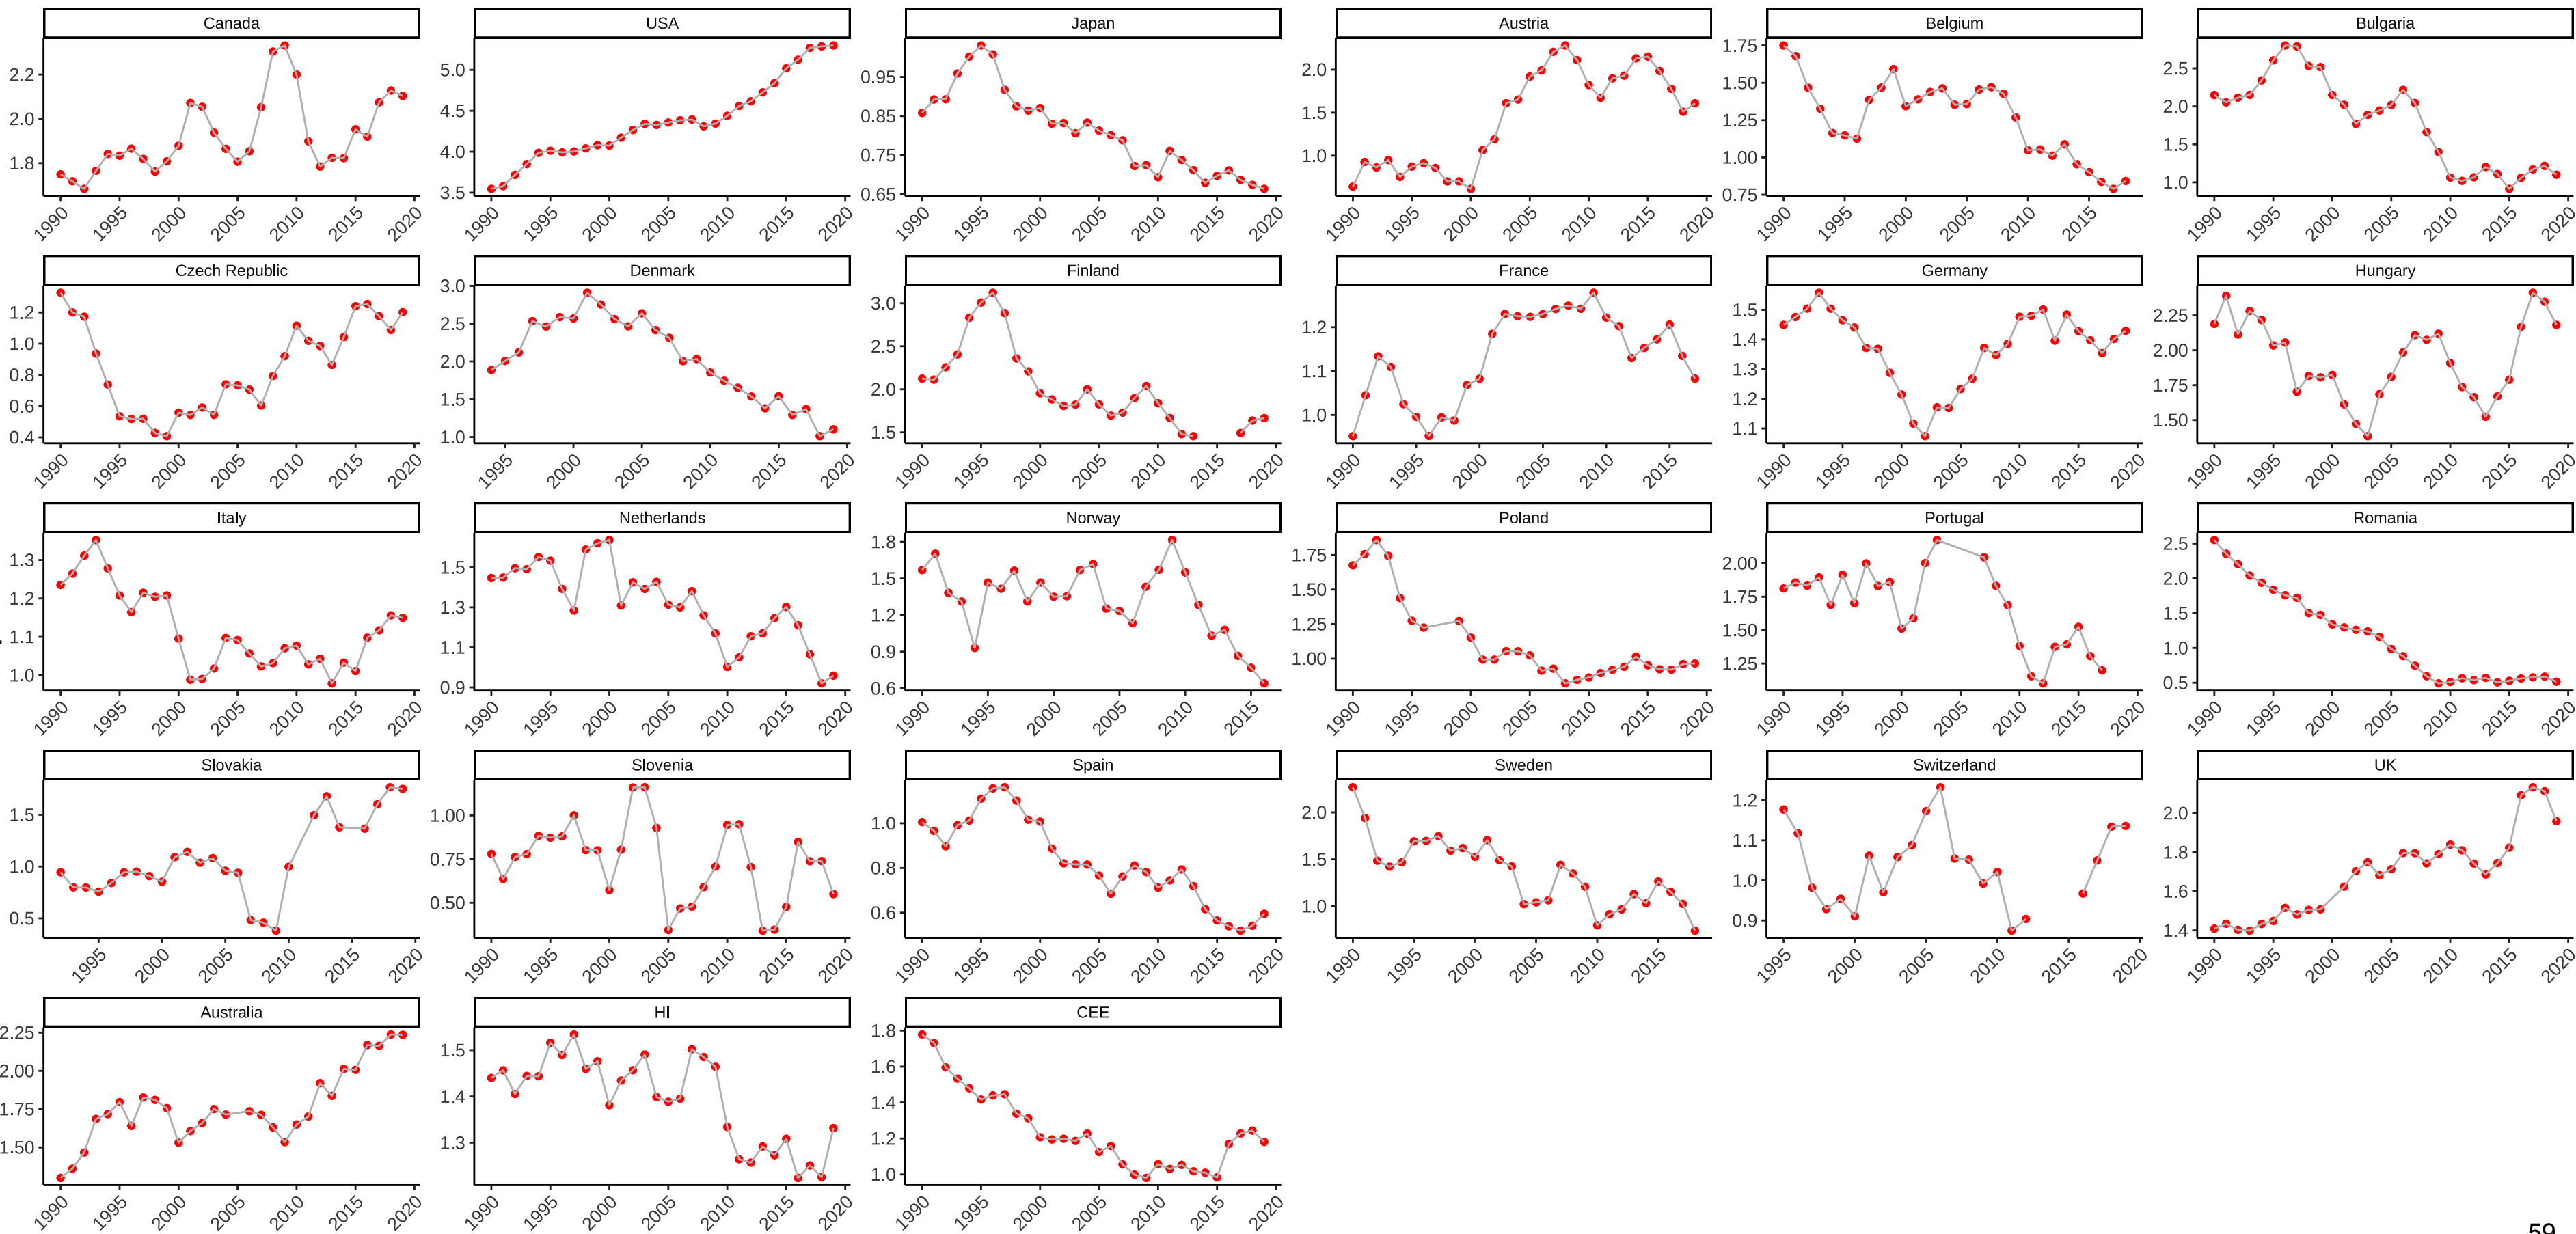

Year

**Figure S53. Three-Year Moving Average of Male Mortality from Cardiovascular Disease at Ages 25-44**

Deaths per 100,000

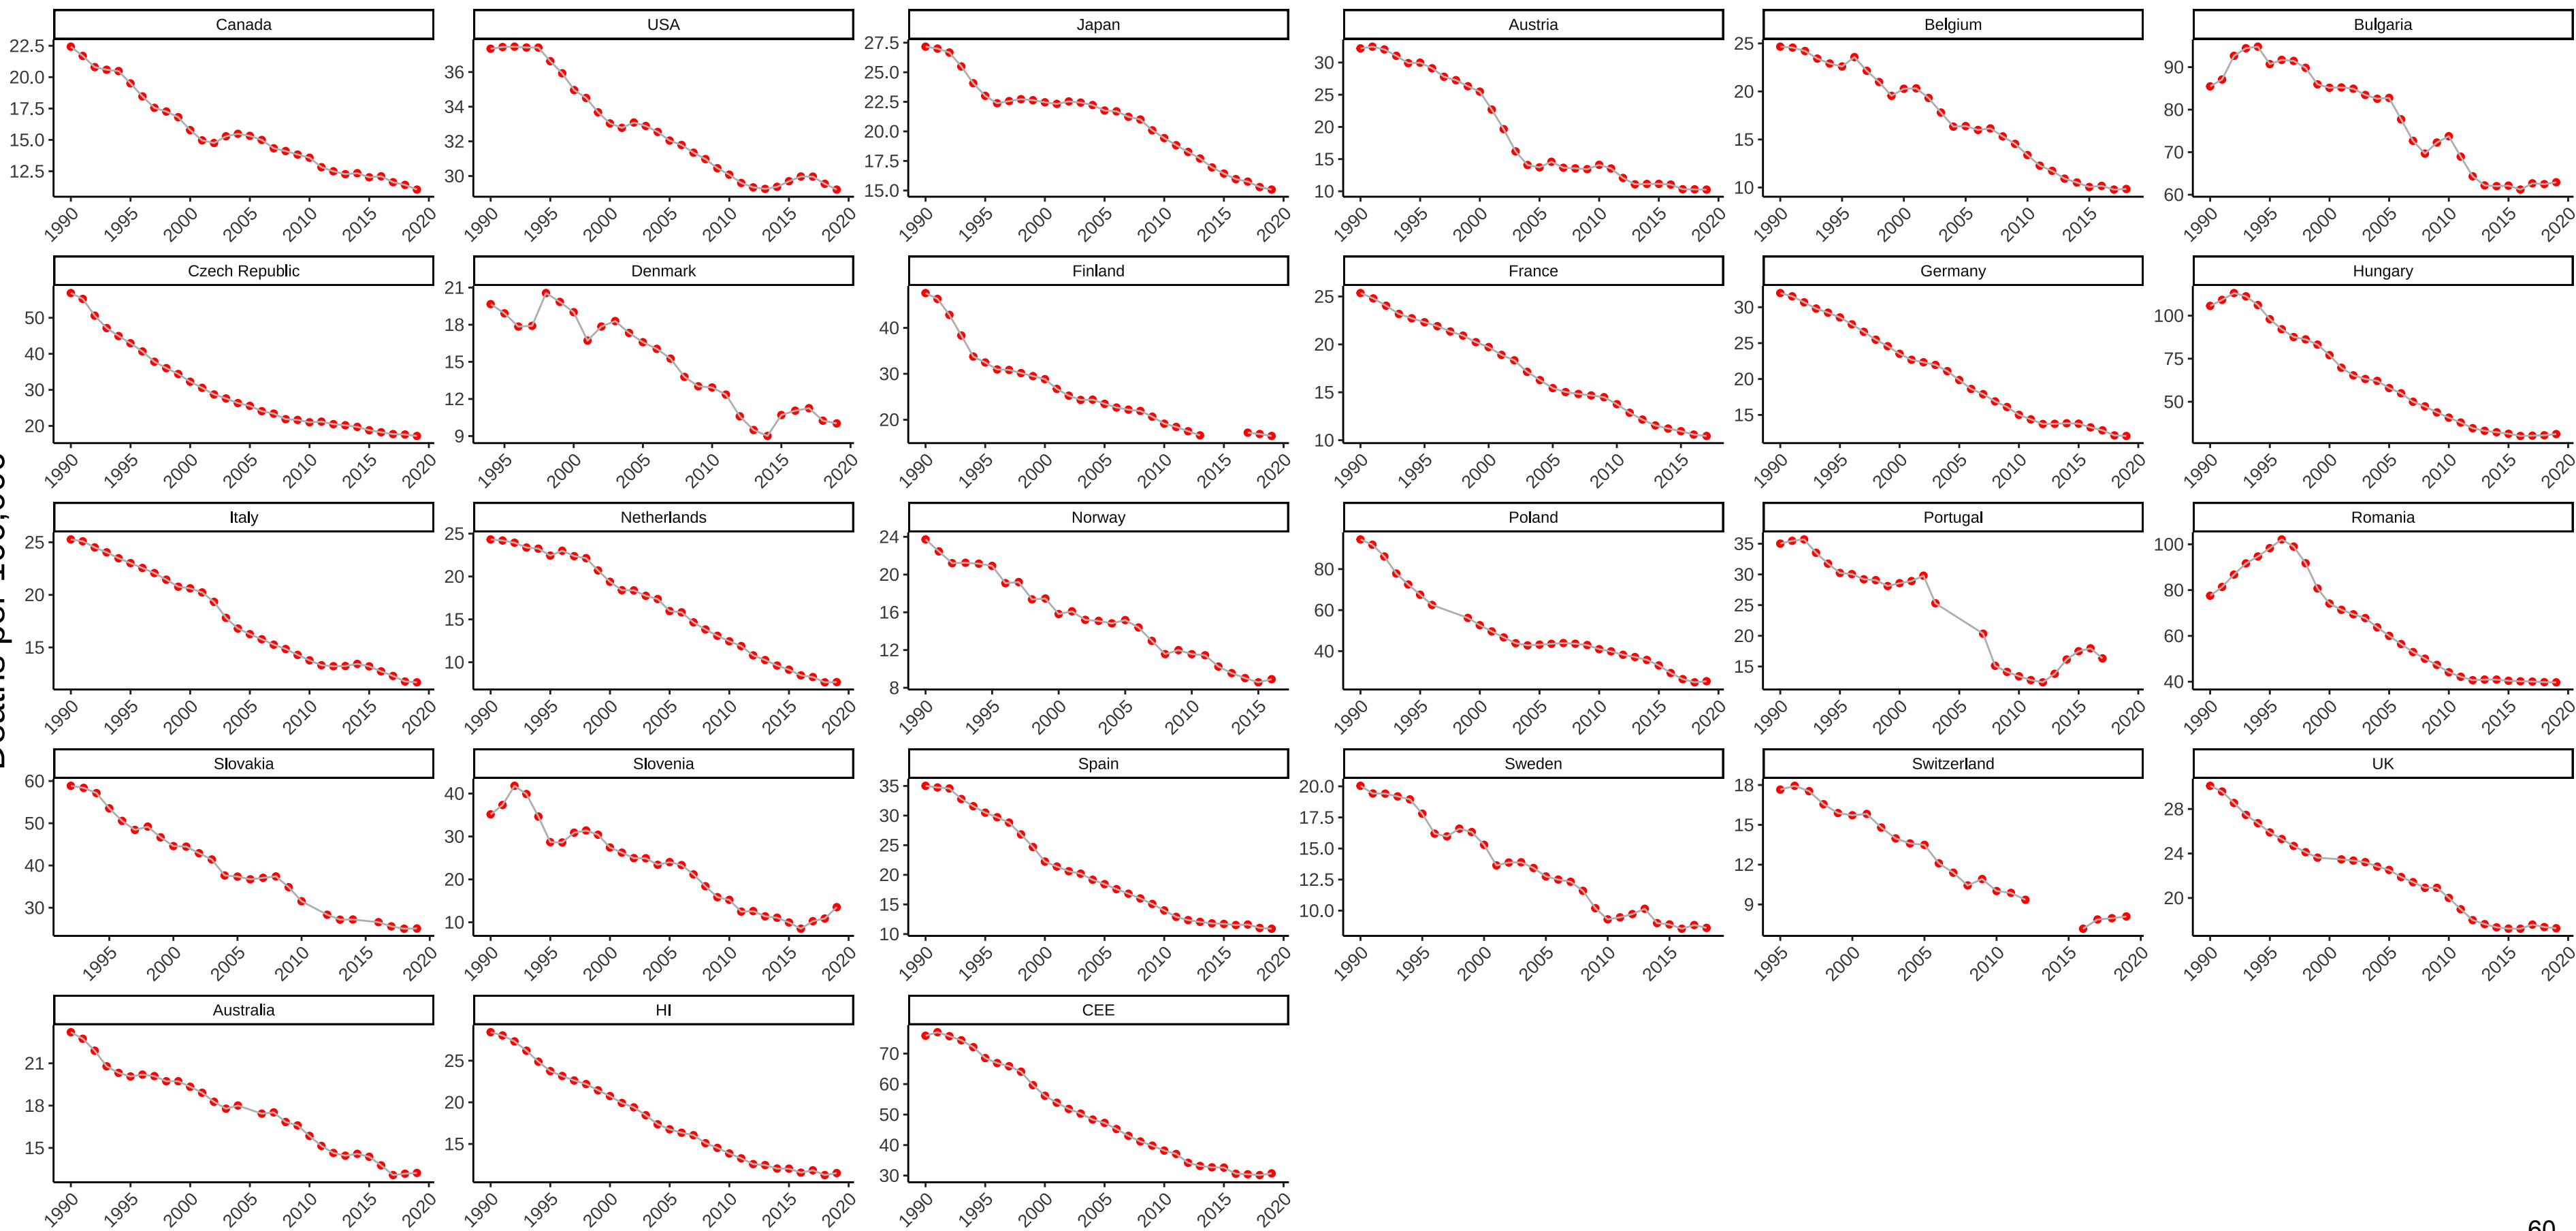

Year

**Figure S54. Three-Year Moving Average of Female Mortality from Cardiovascular Disease at Ages 25-44**

Deaths per 100,000

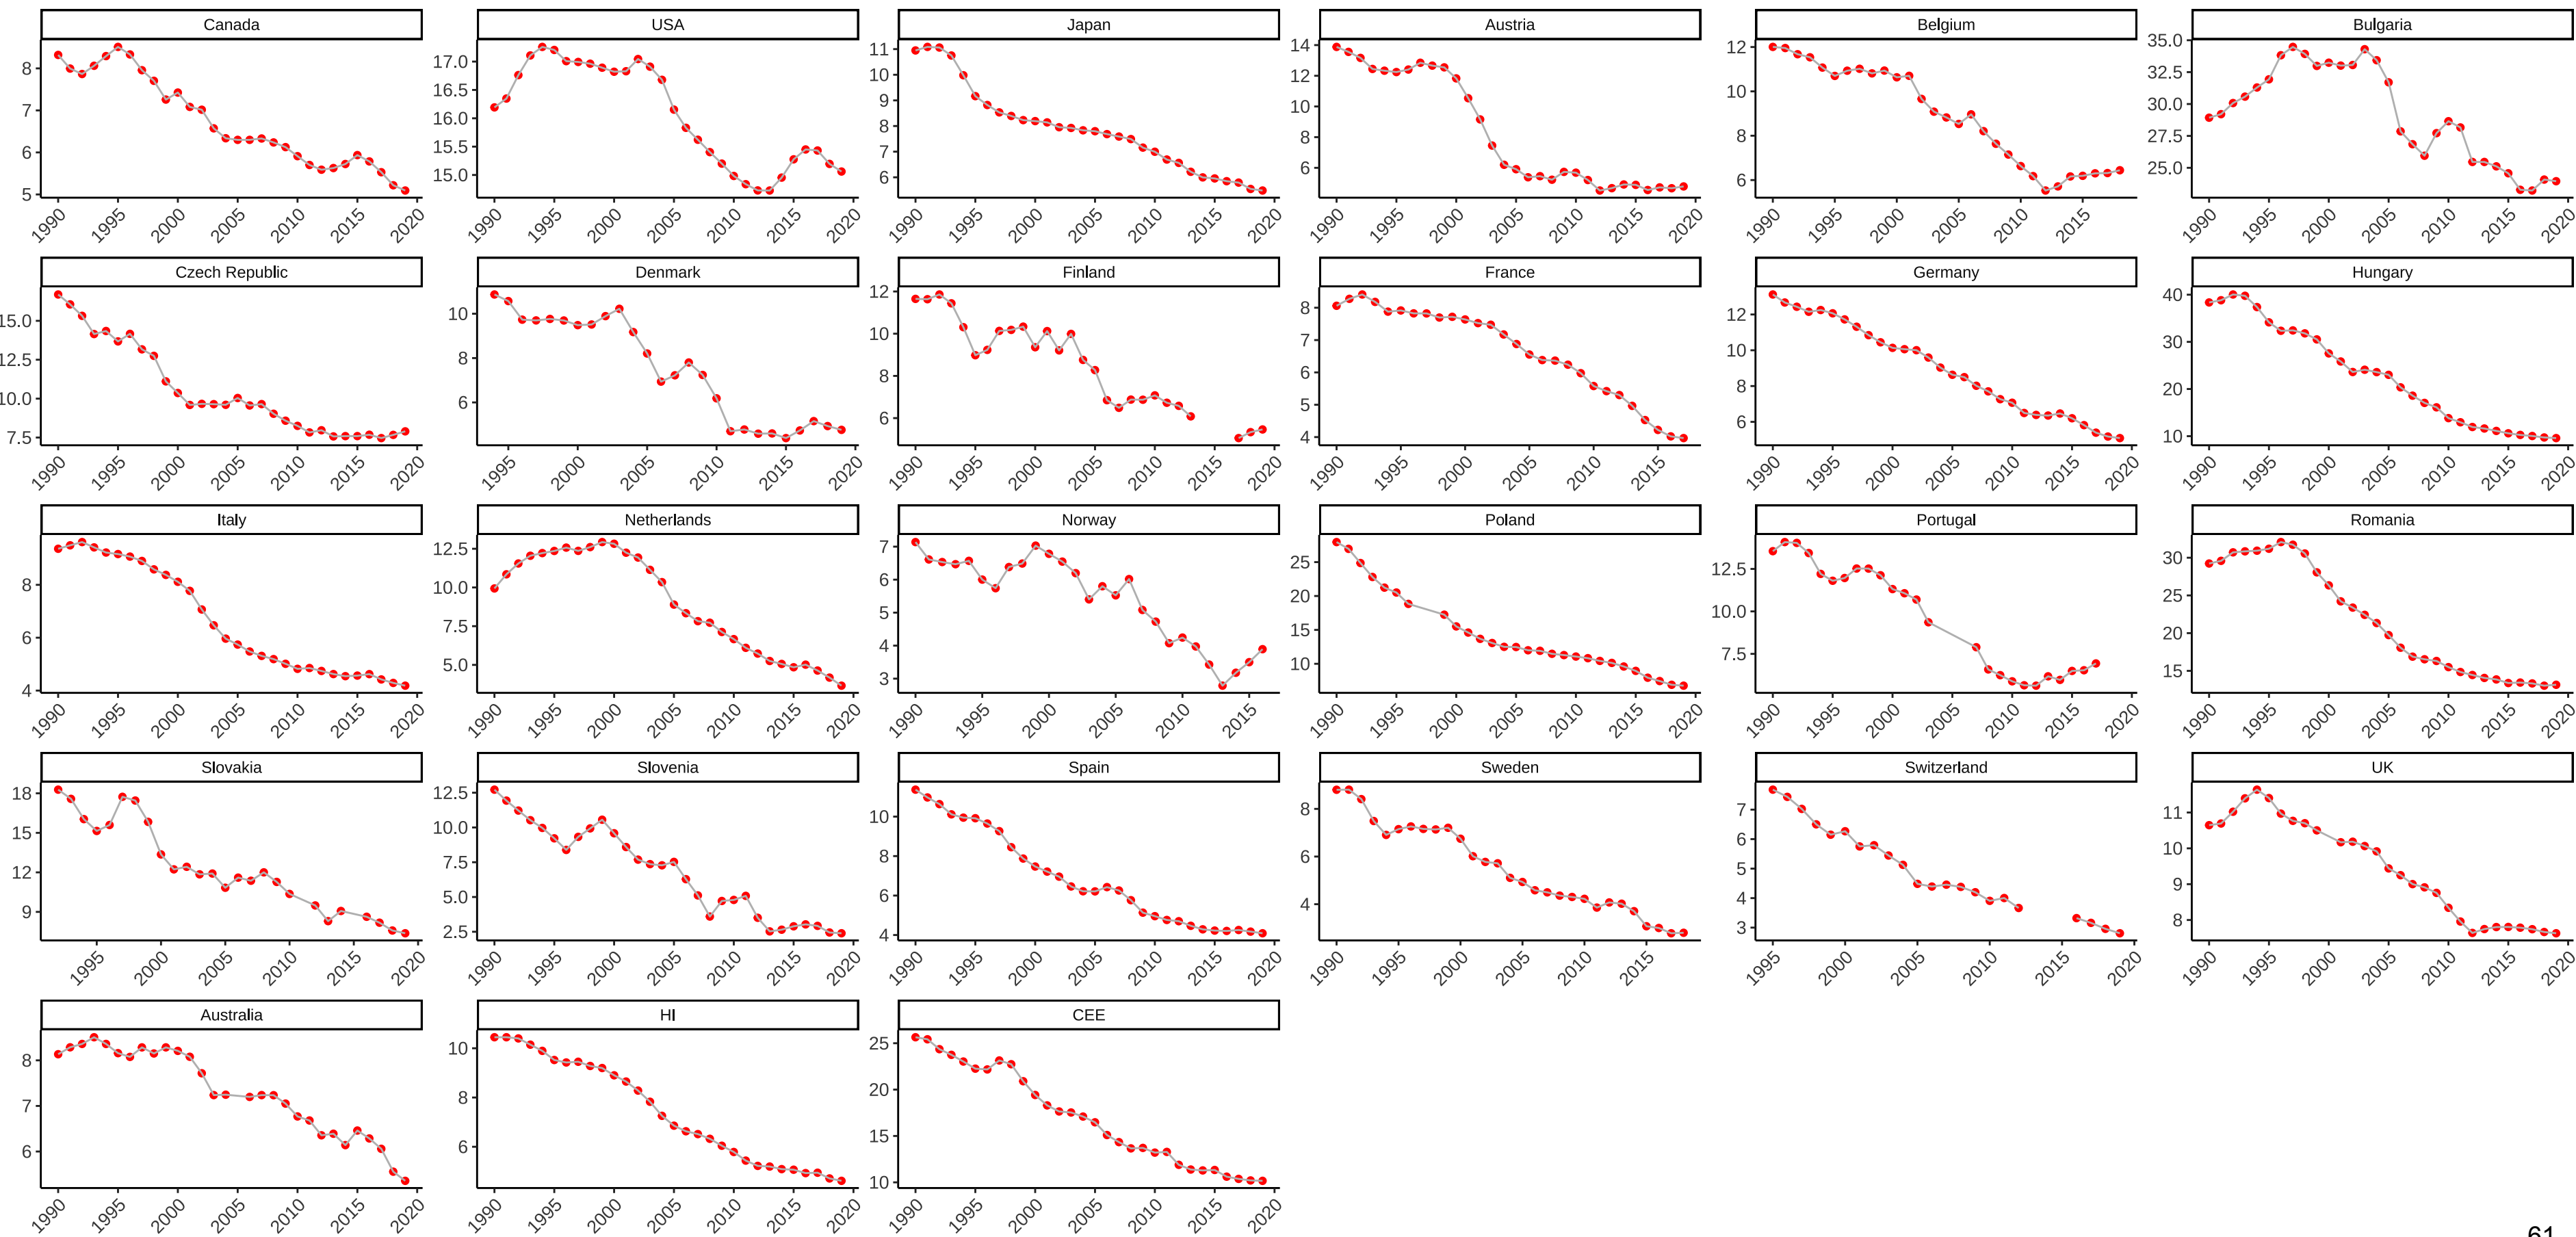

Year

**Figure S55. Three-Year Moving Average of Male Mortality from Suicide at Ages 25-44**

Deaths per 100,000

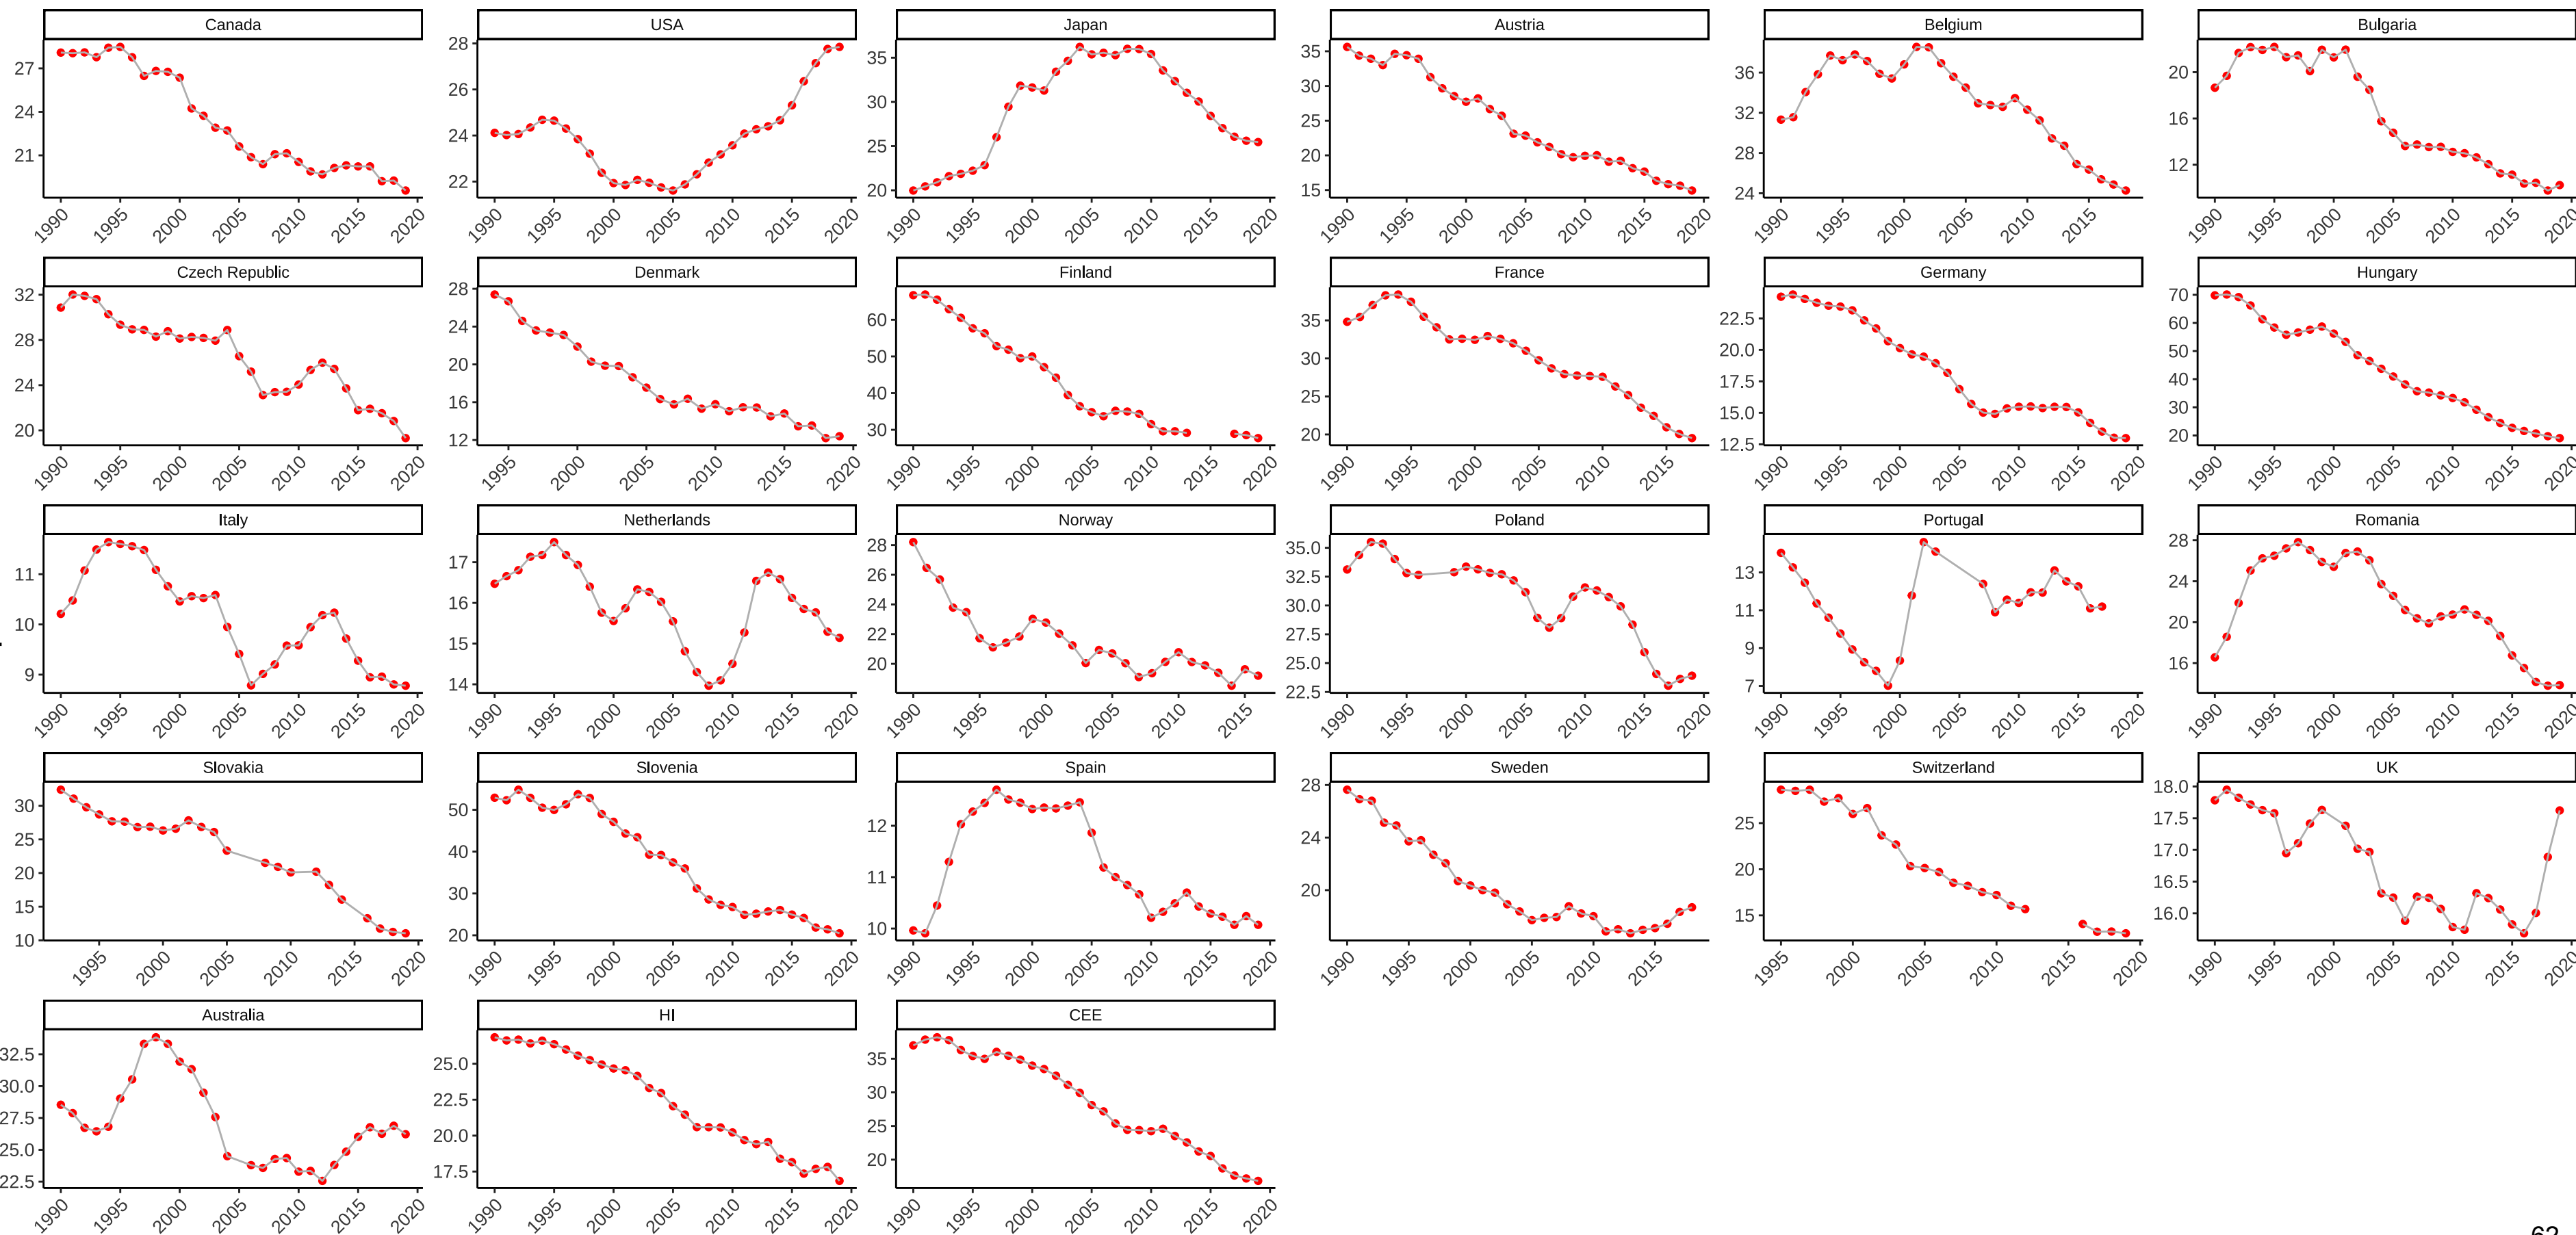

Year

**Figure S56. Three-Year Moving Average of Female Mortality from Suicide at Ages 25-44**

Deaths per 100,000

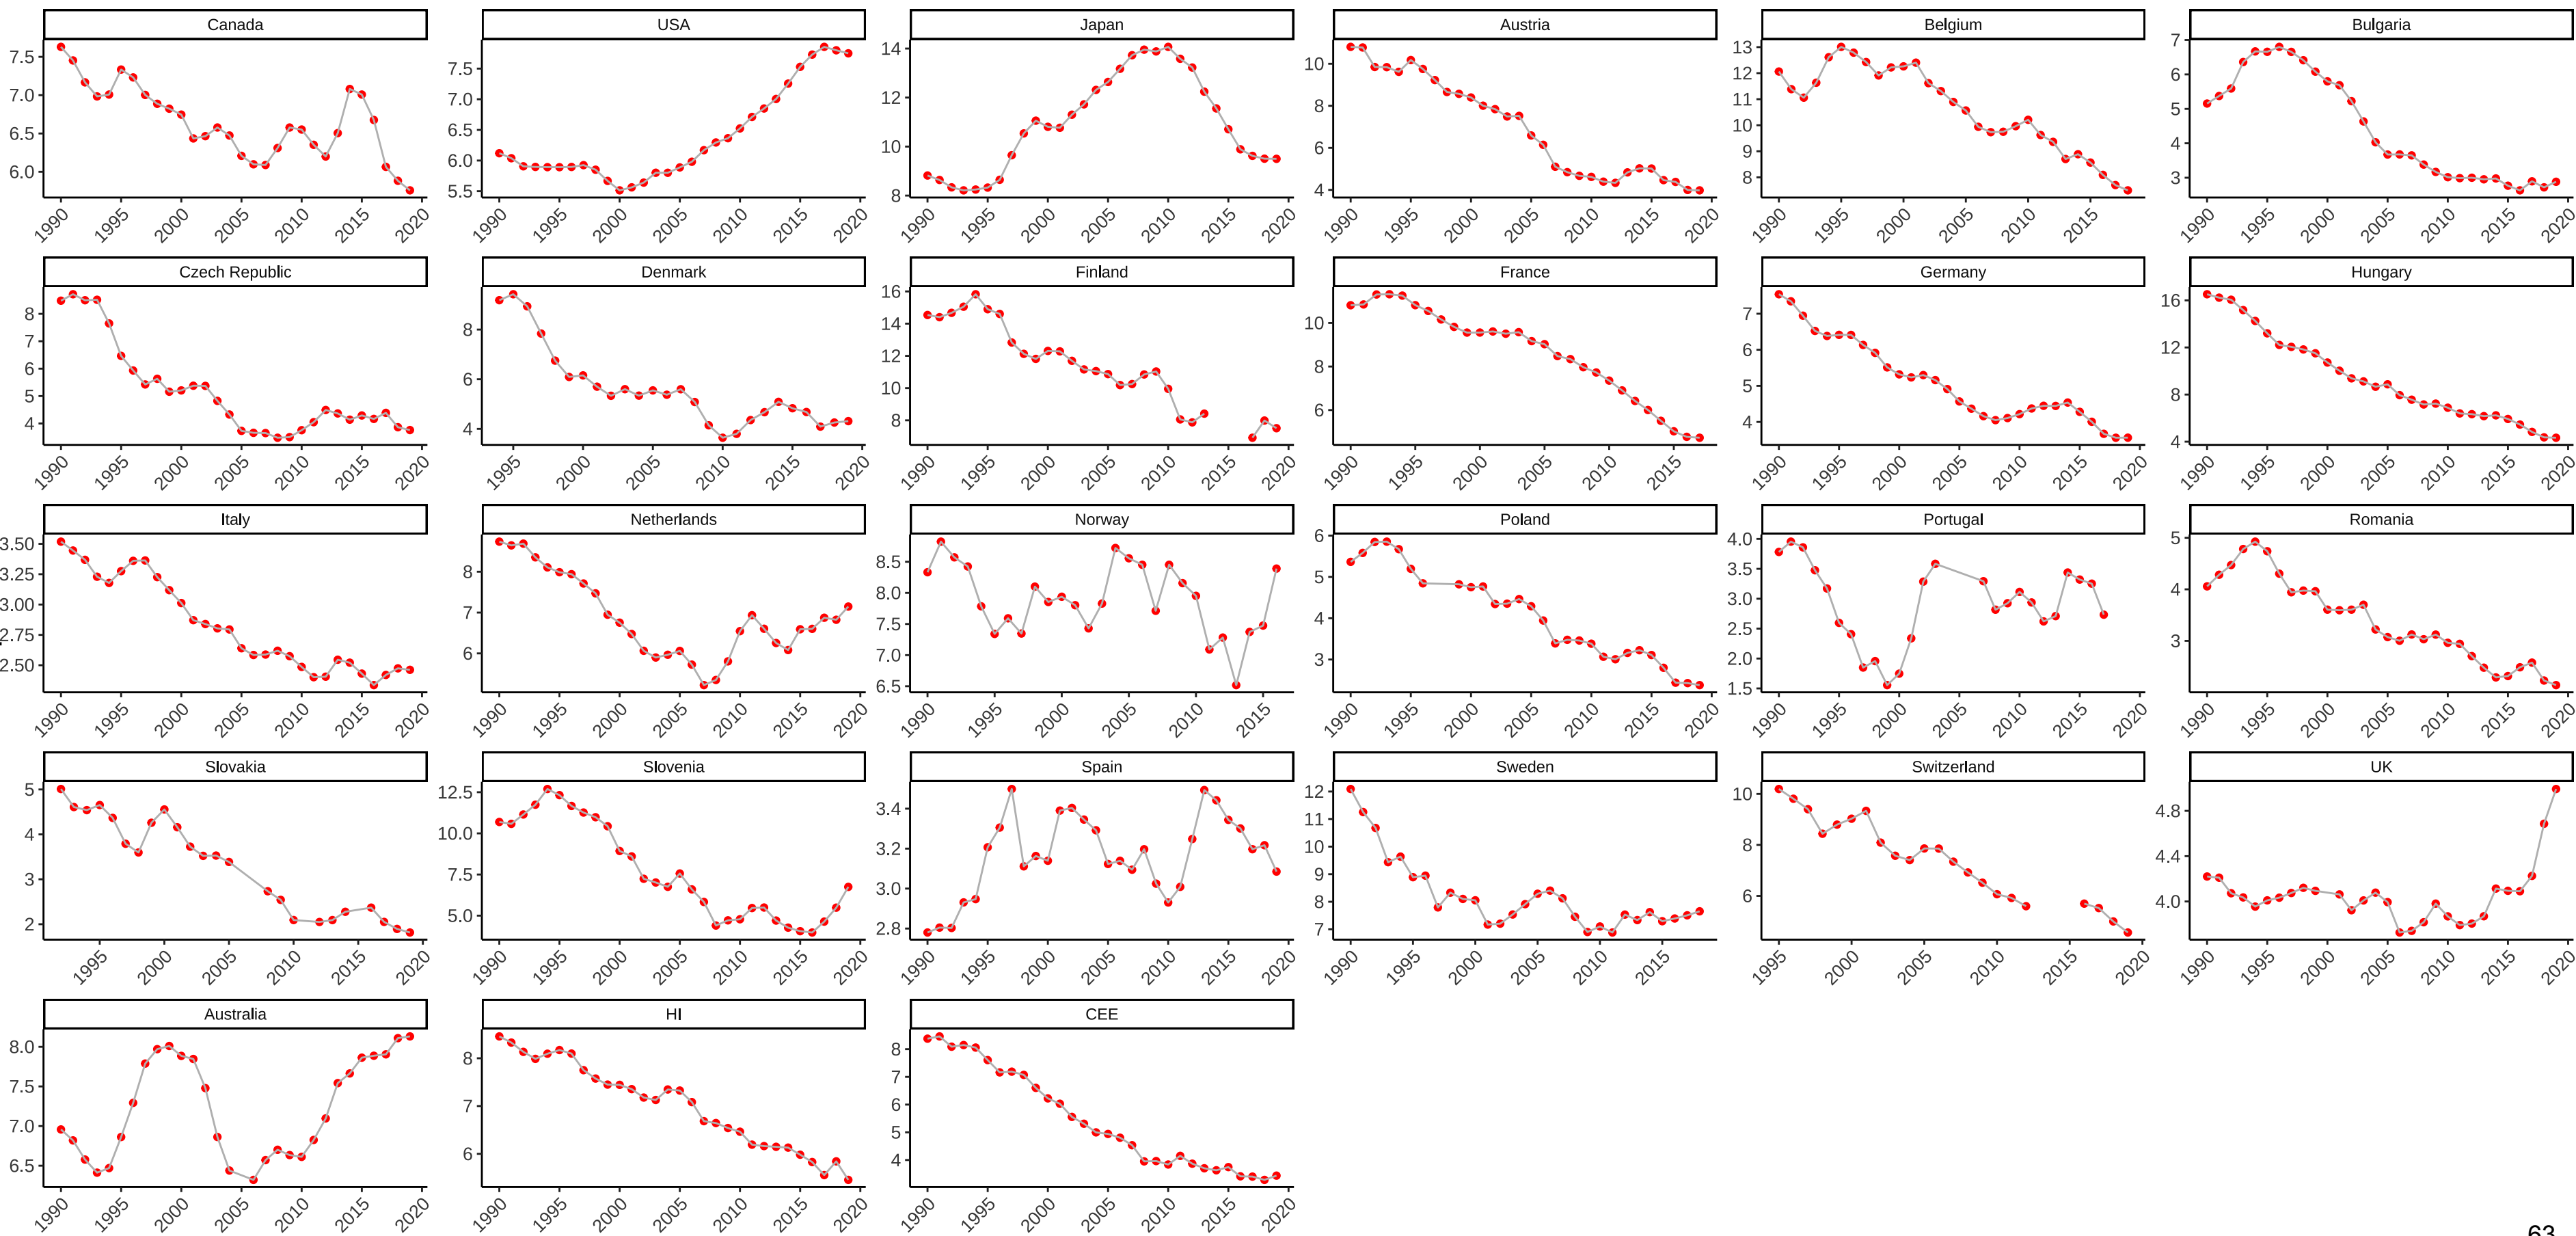

**Figure S57. Three-Year Moving Average of Male Mortality from Homicide at Ages 25-44**

Deaths per 100,000

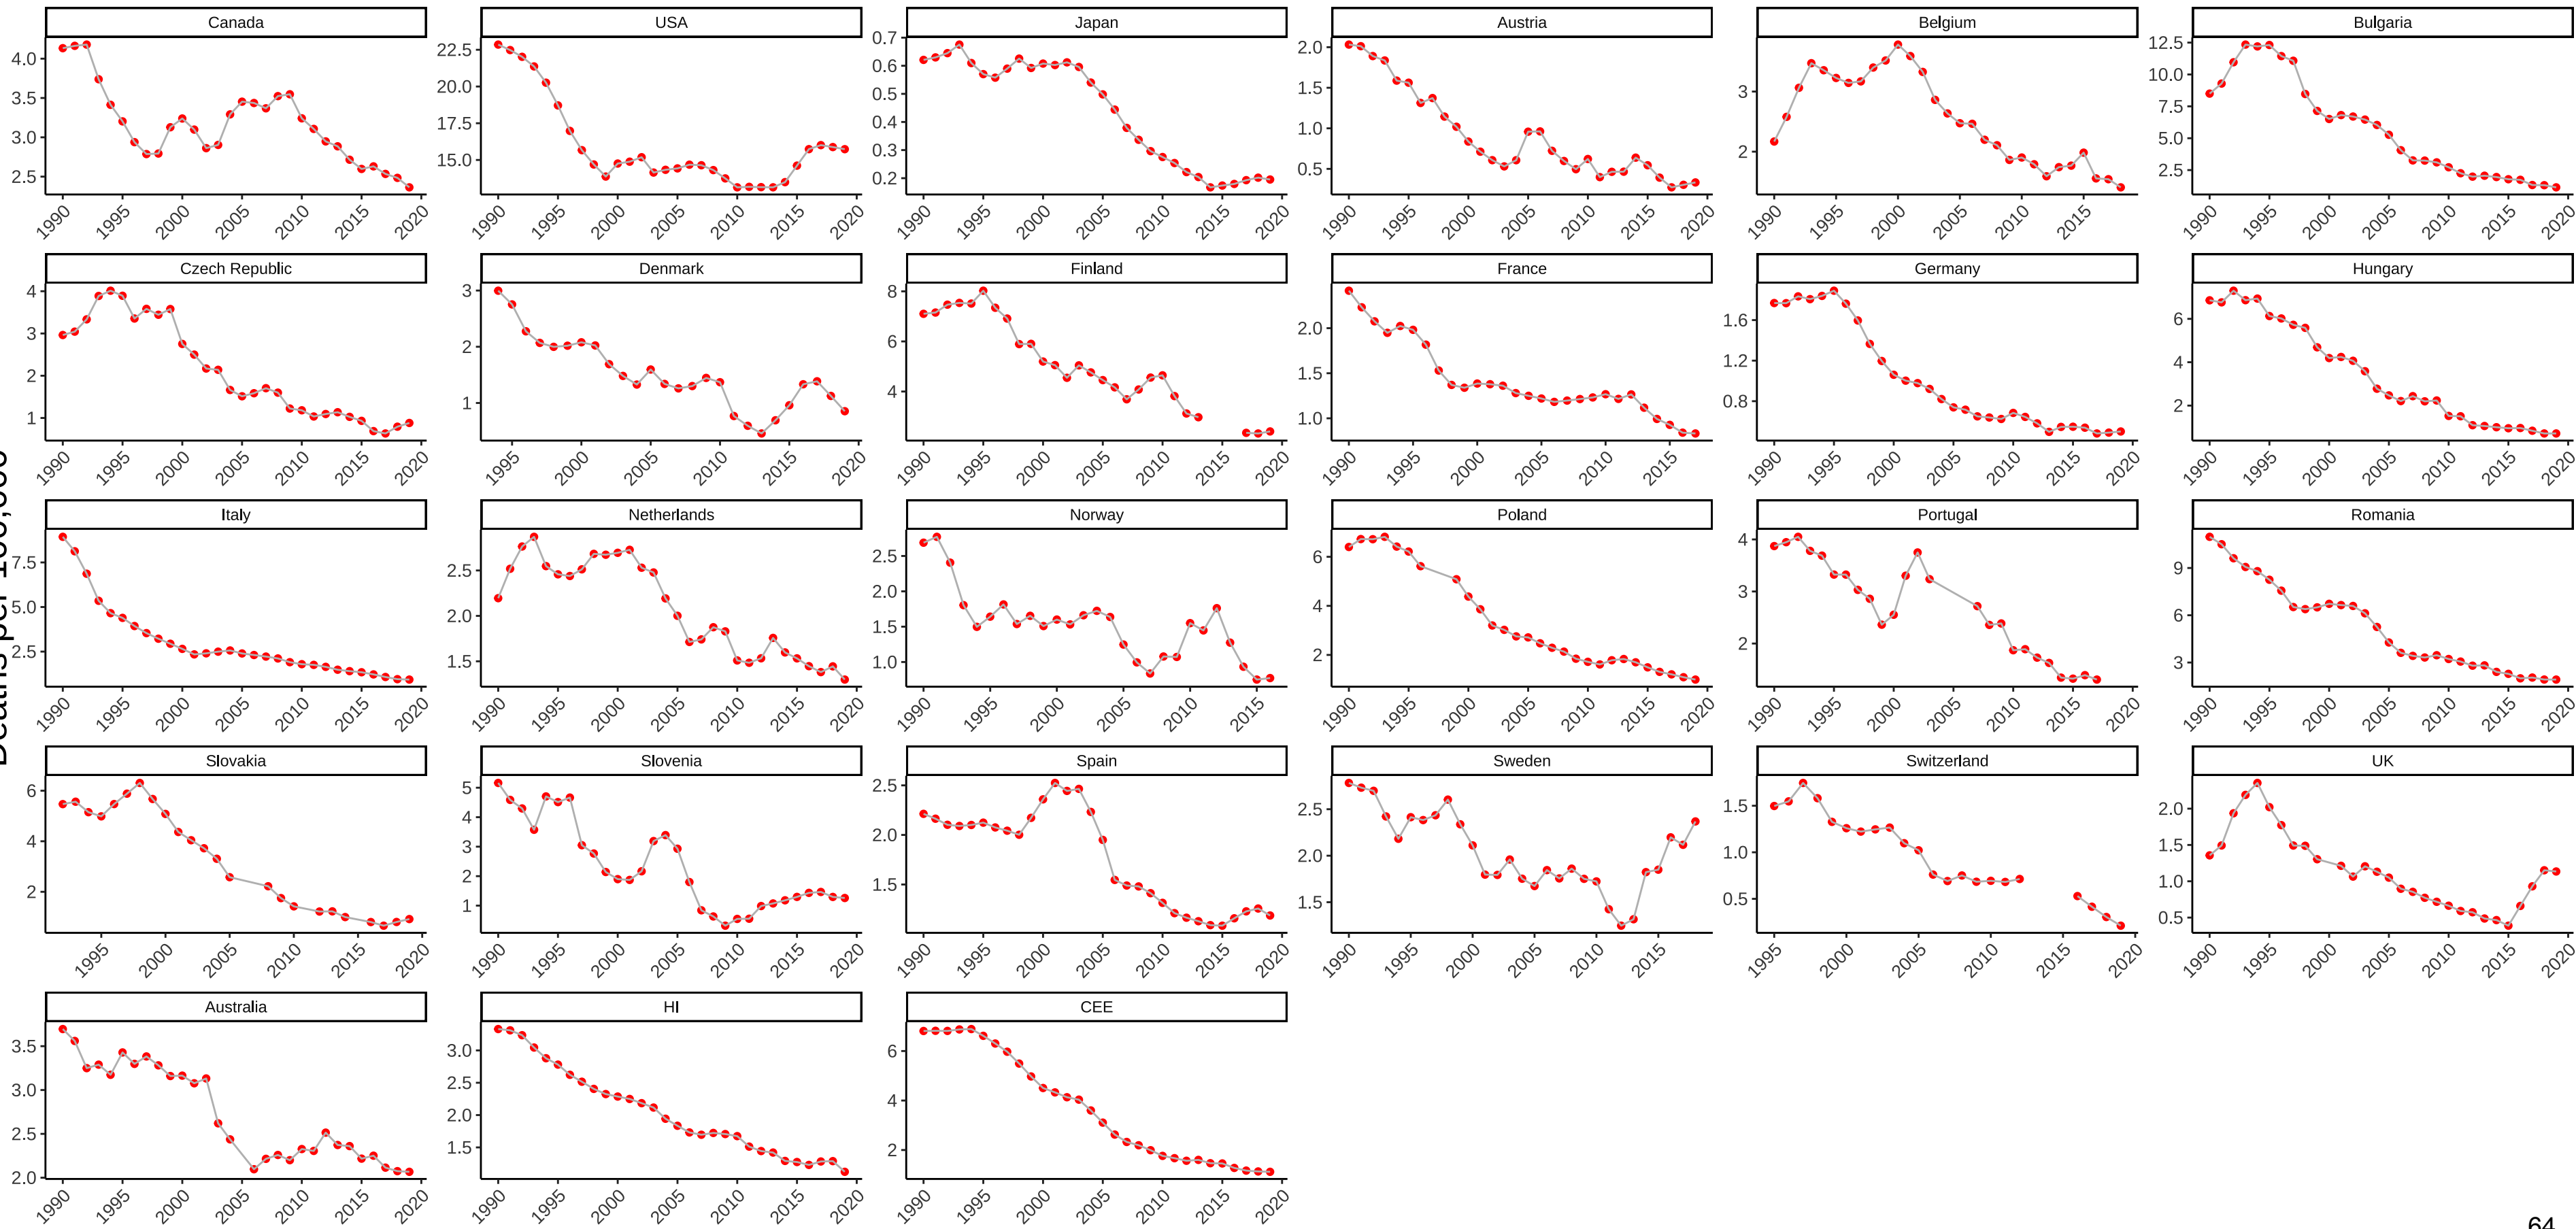

Year

**Figure S58. Three-Year Moving Average of Female Mortality from Homicide at Ages 25-44**

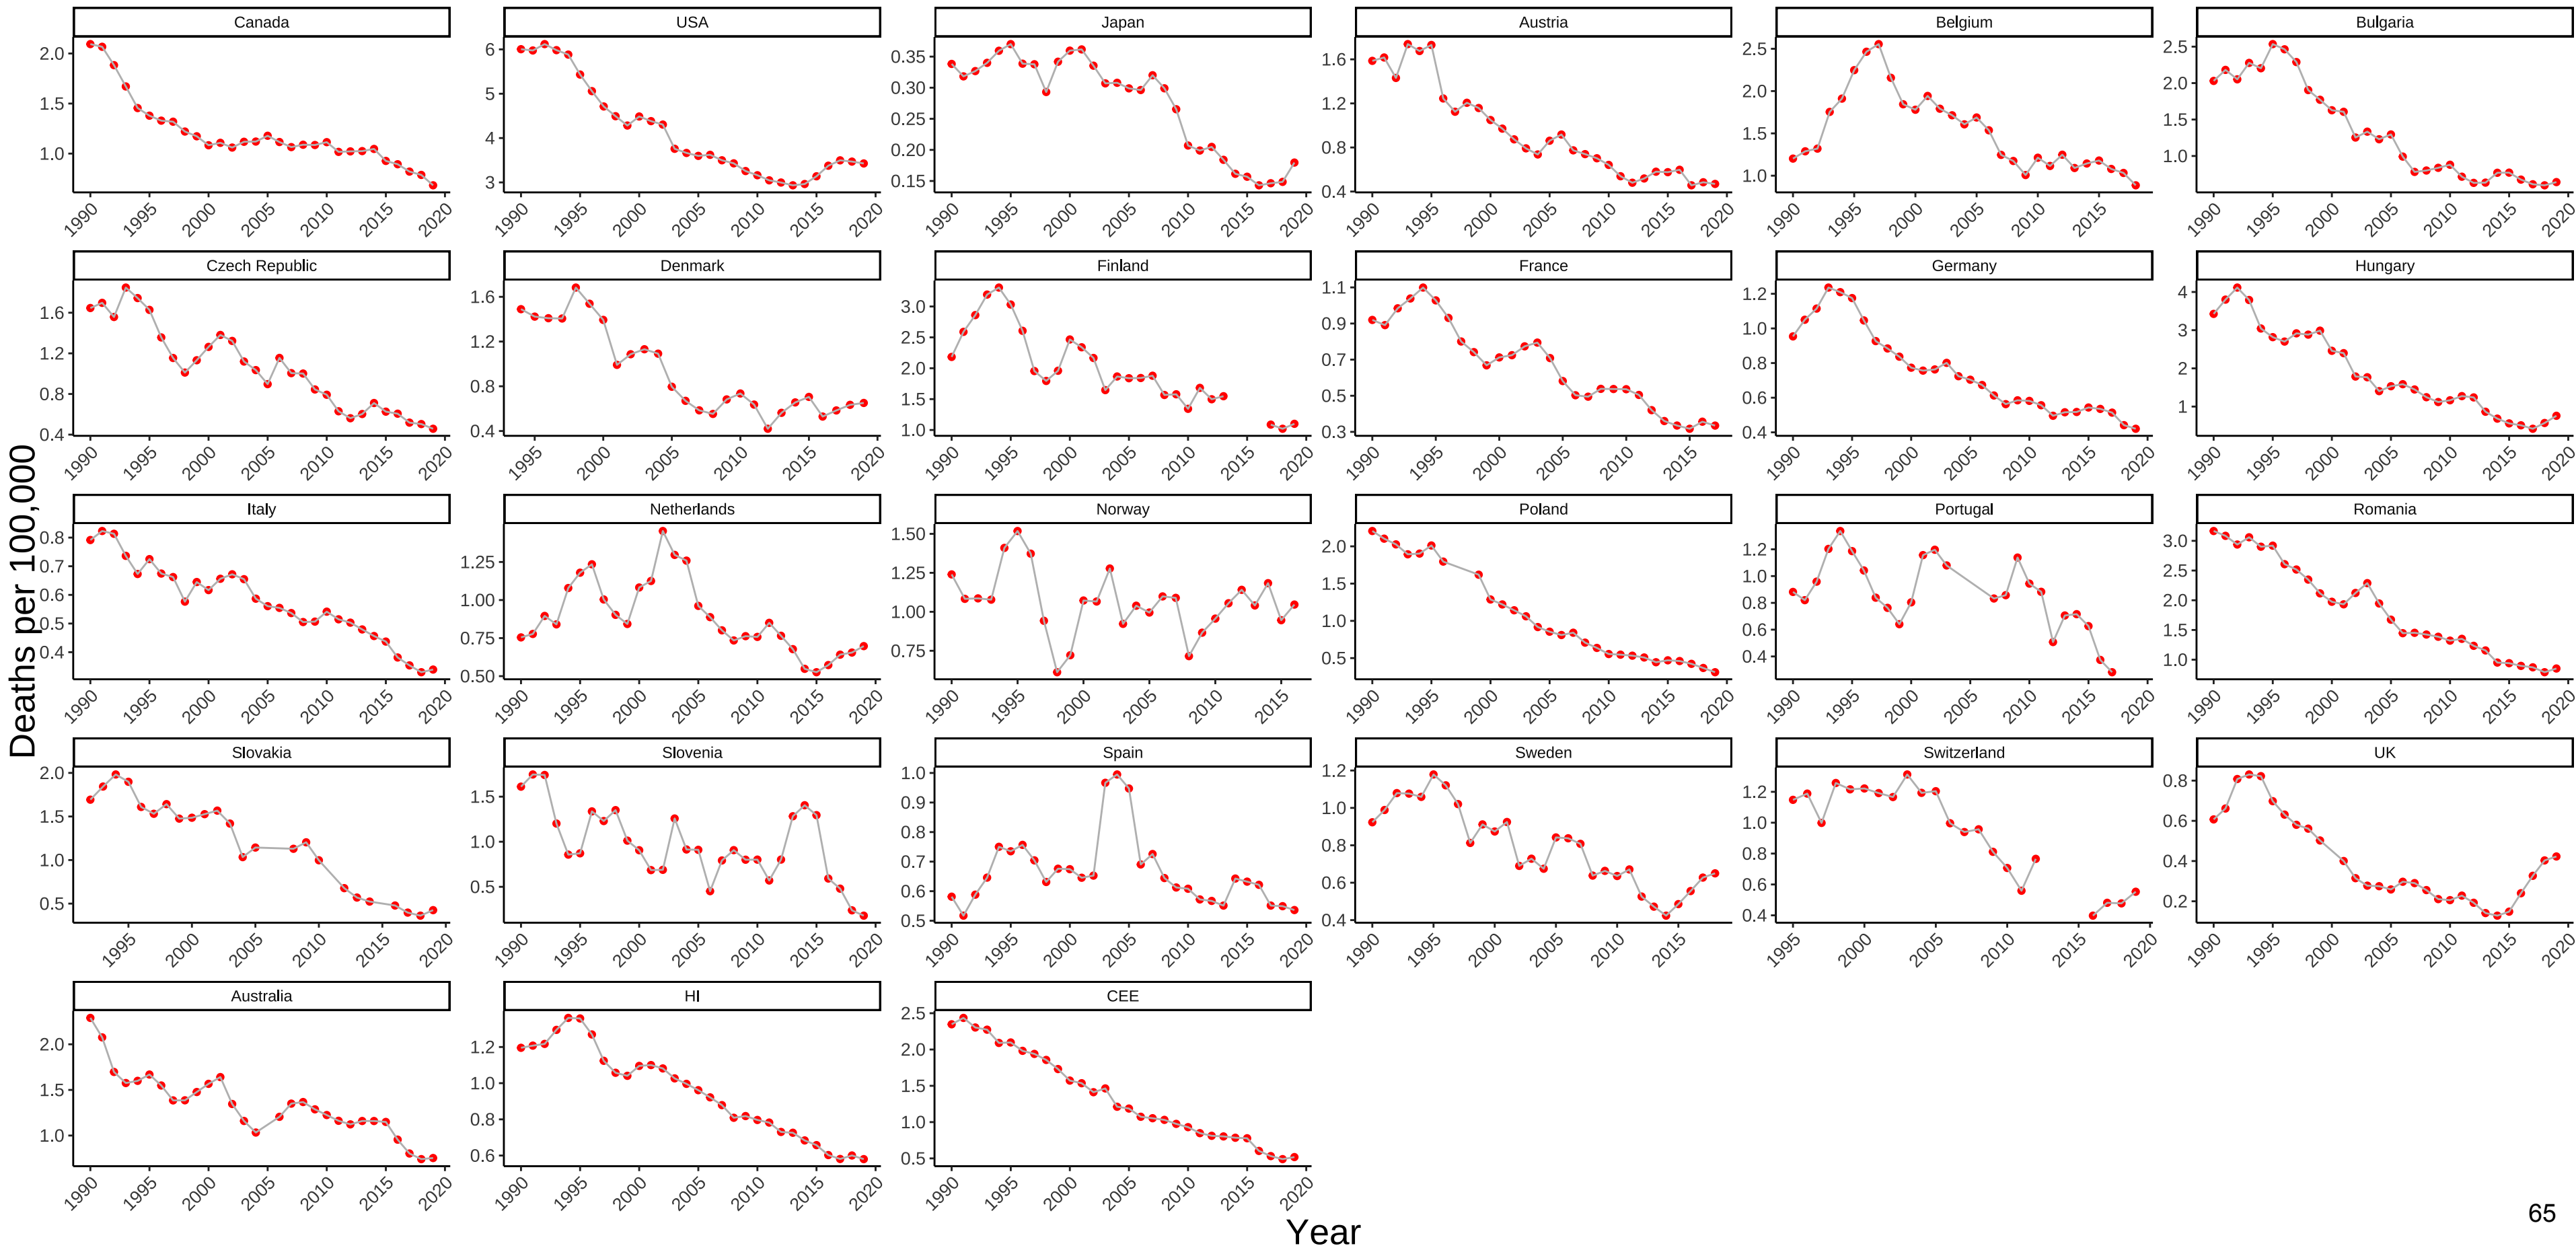

**Figure S59. Three-Year Moving Average of Male Mortality from Transport Accidents at Ages 25-44**

Deaths per 100,000

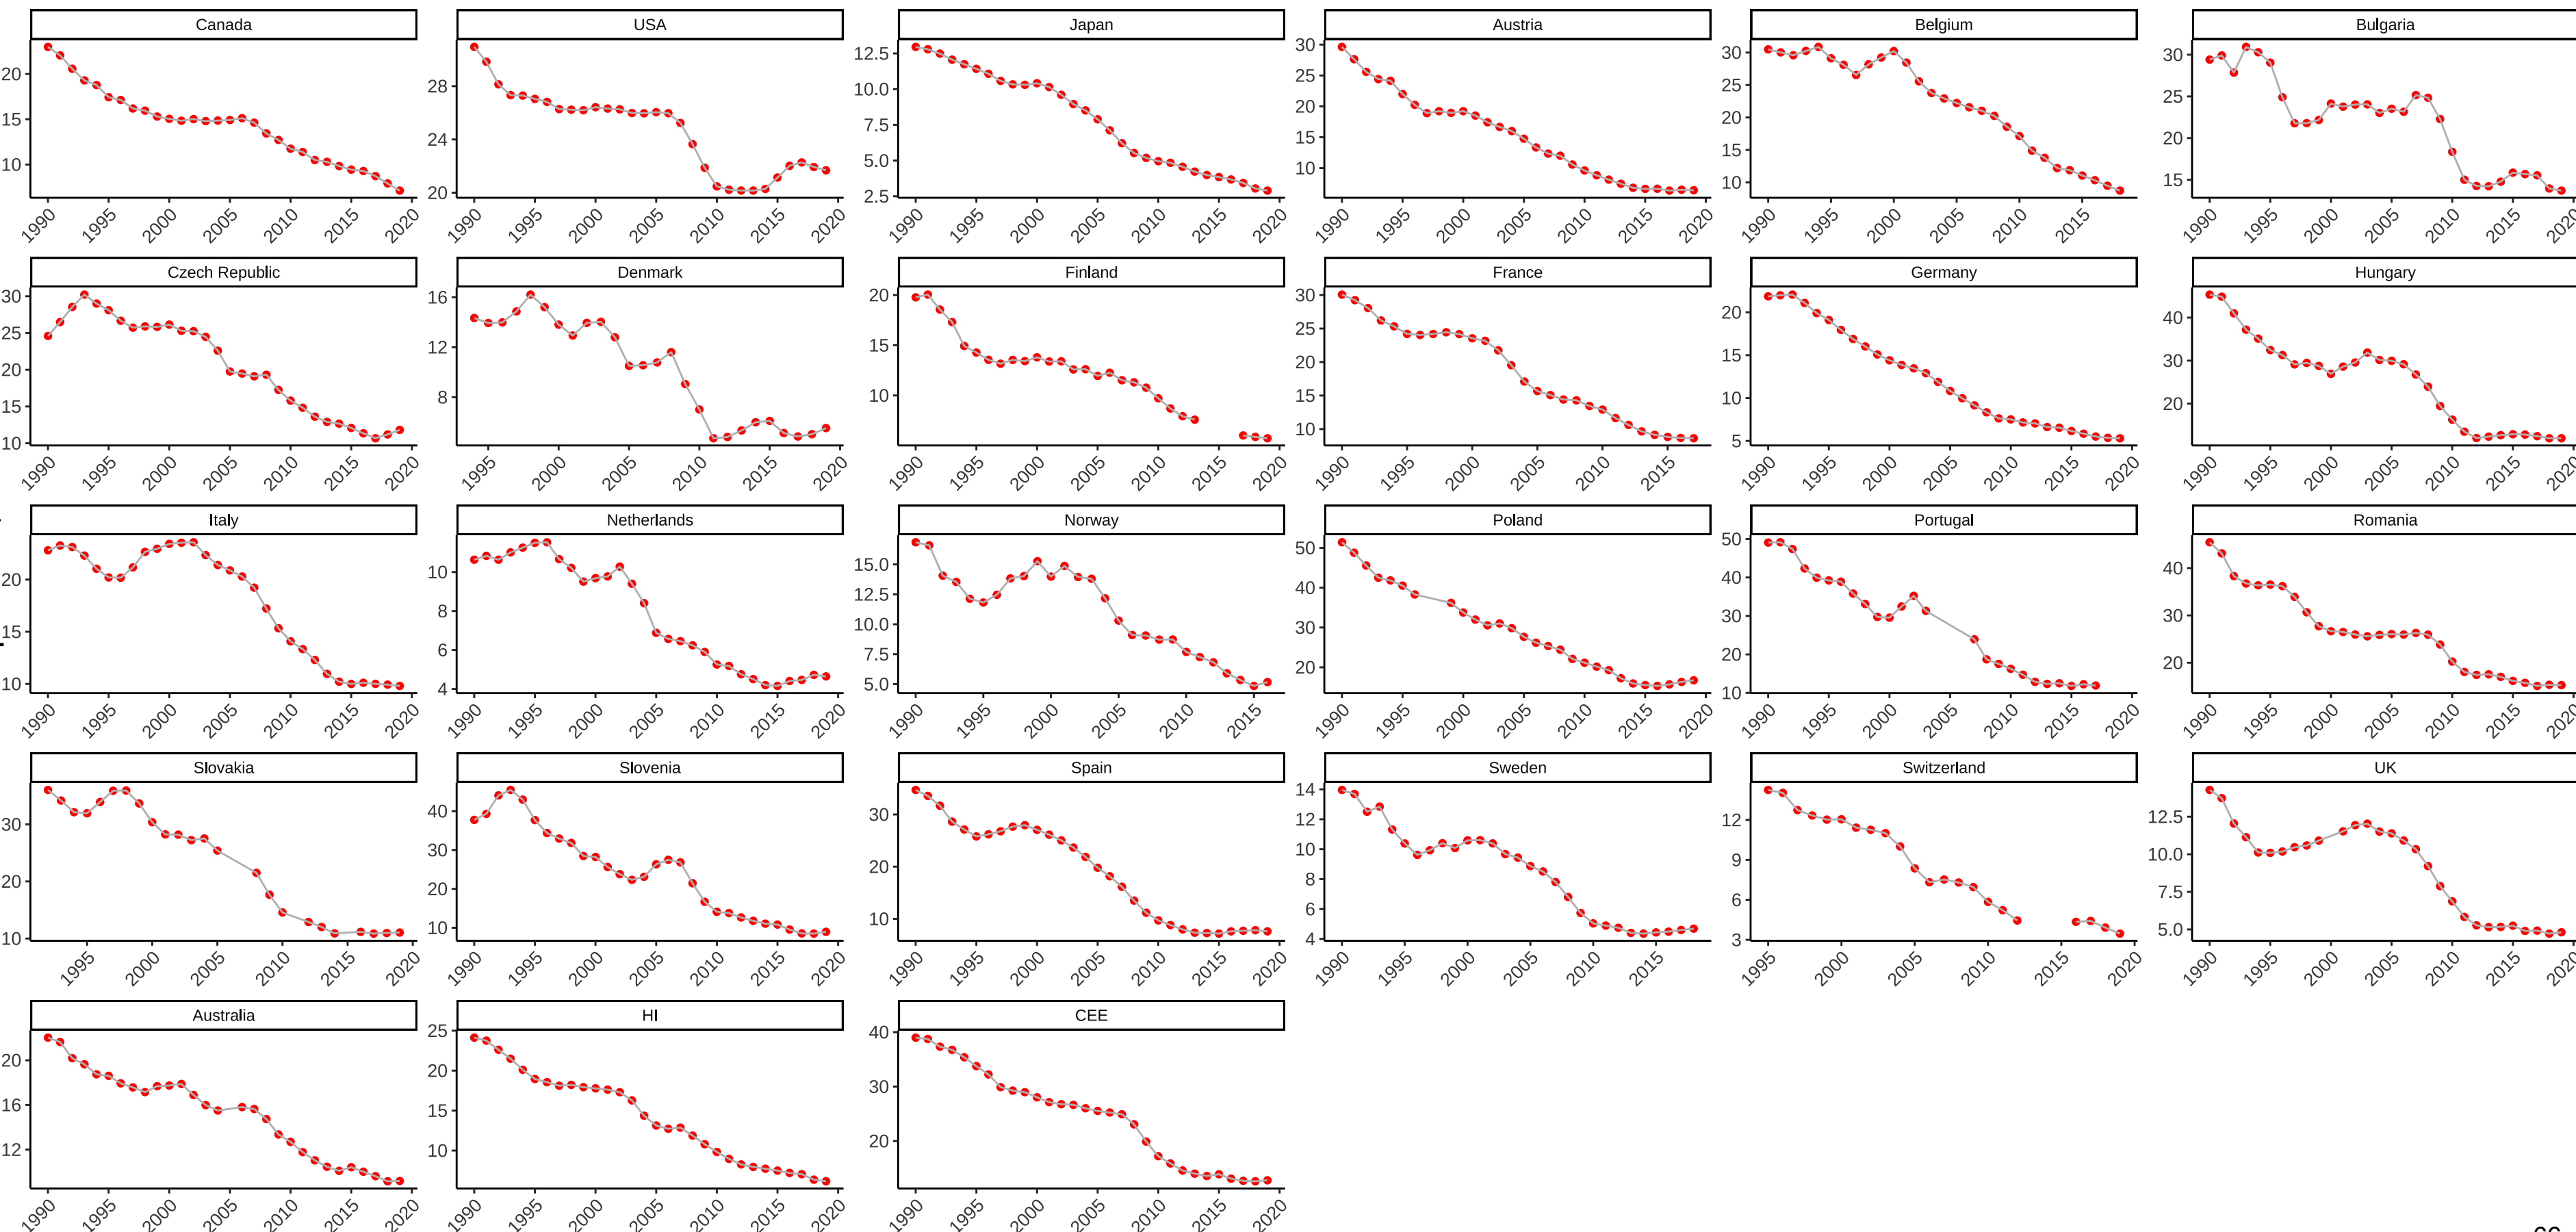

Year

**Figure S60. Three-Year Moving Average of Female Mortality from Transport Accidents at Ages 25-44**

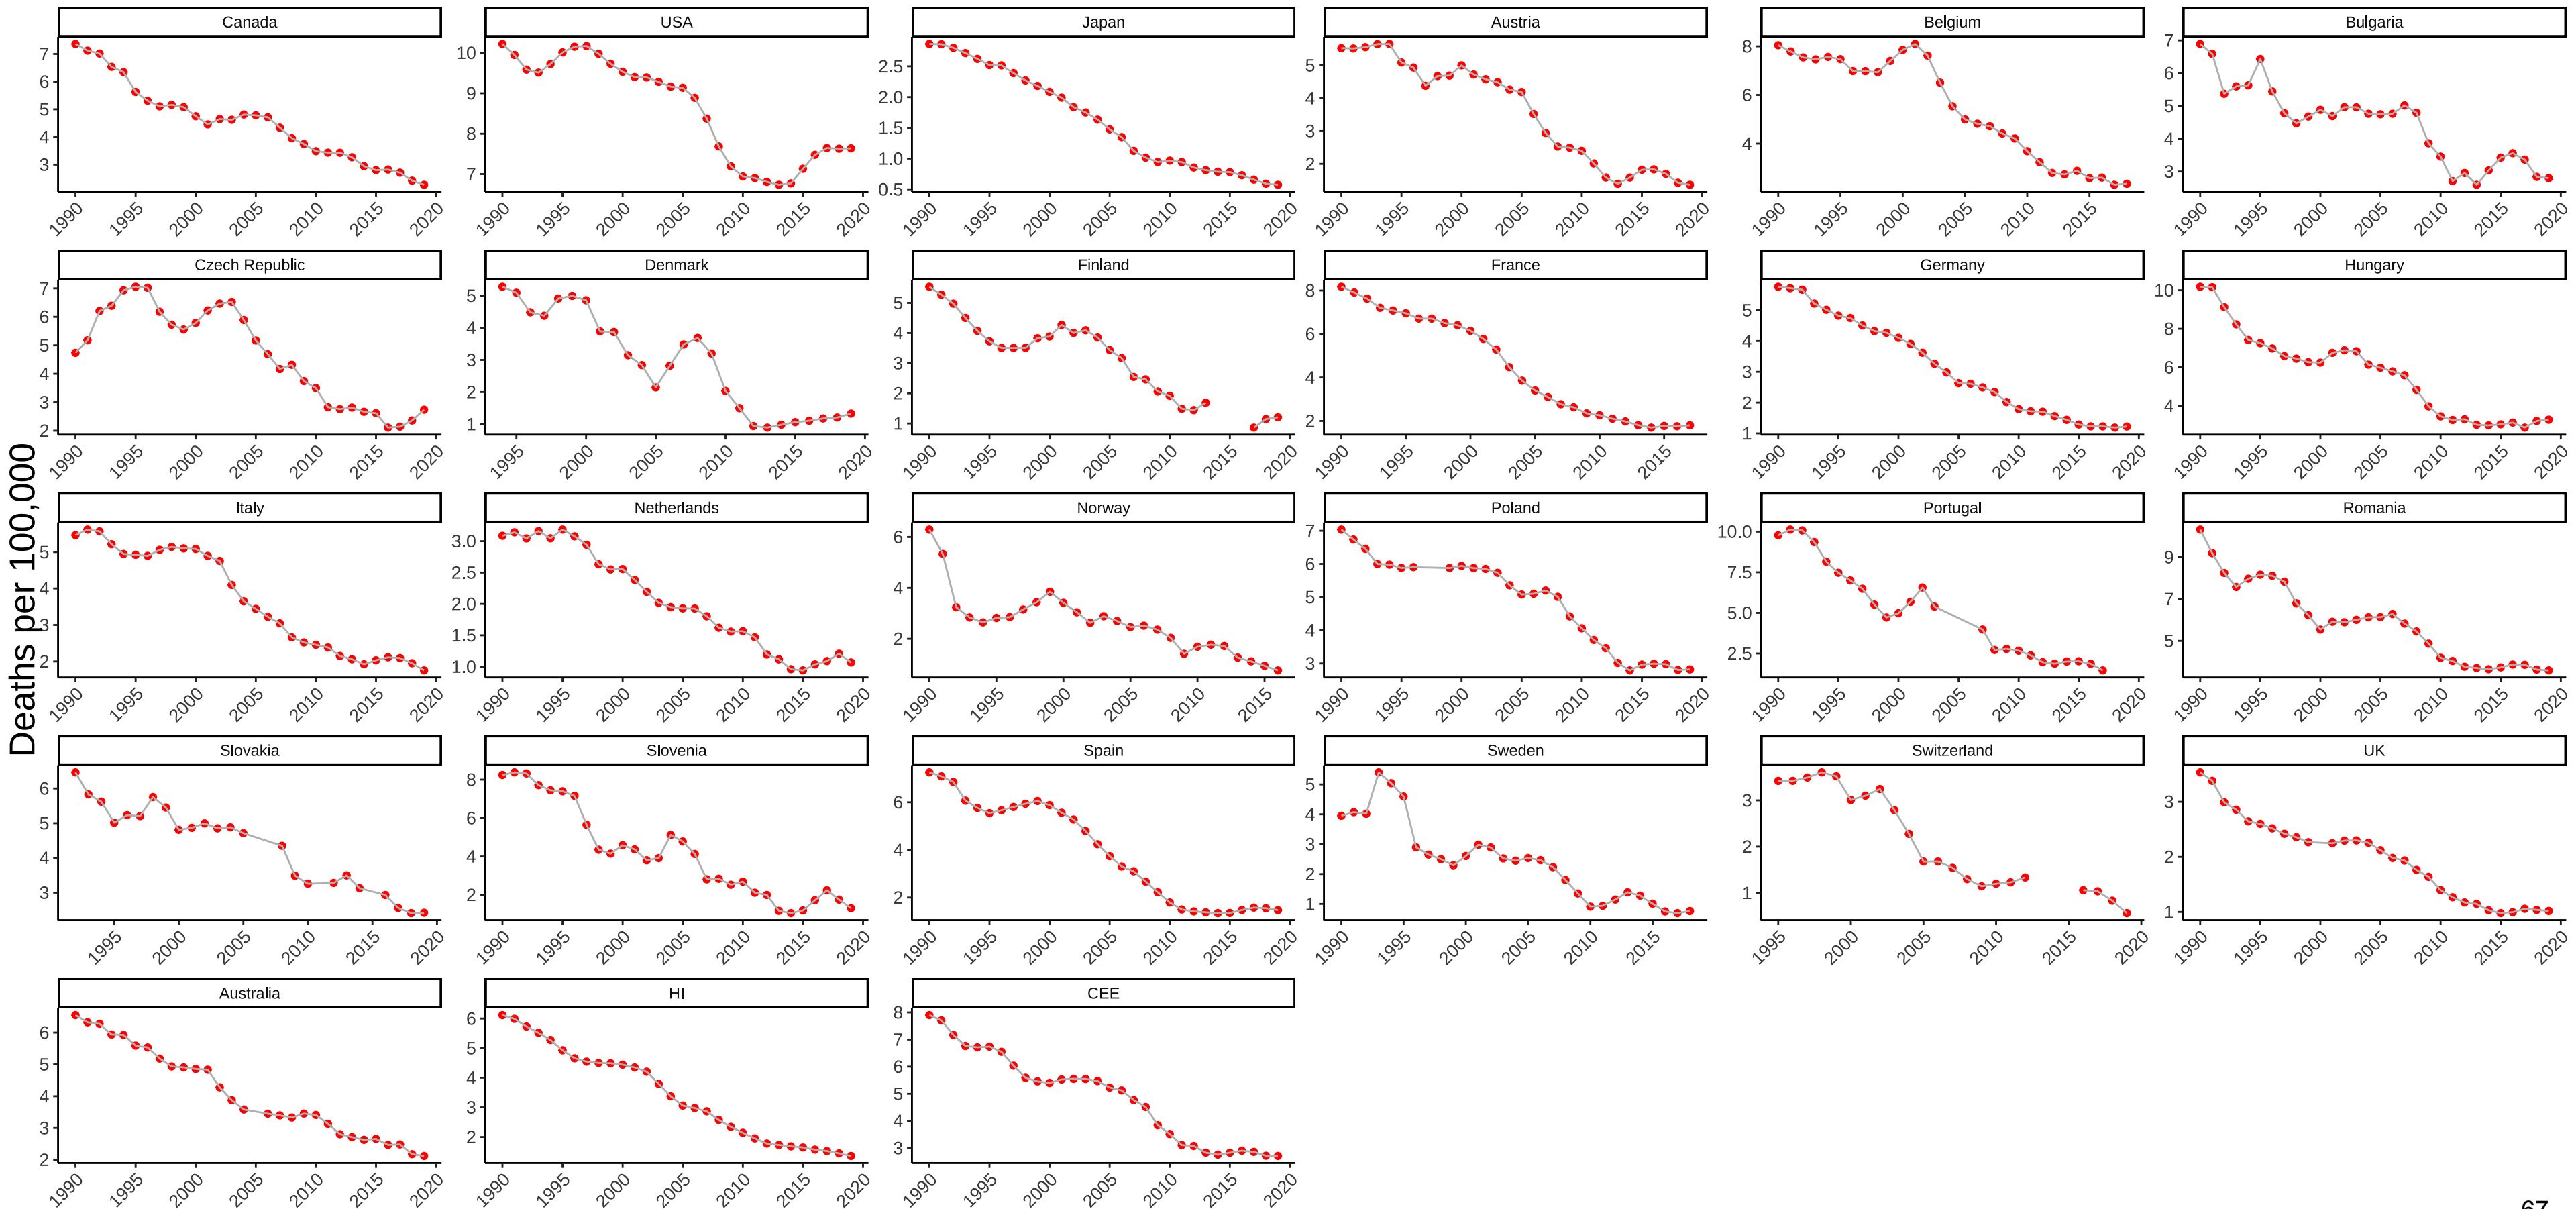

**Figure S61. Three-Year Moving Average of Male Mortality from Other External Causes at Ages 25-44**

Deaths per 100,000

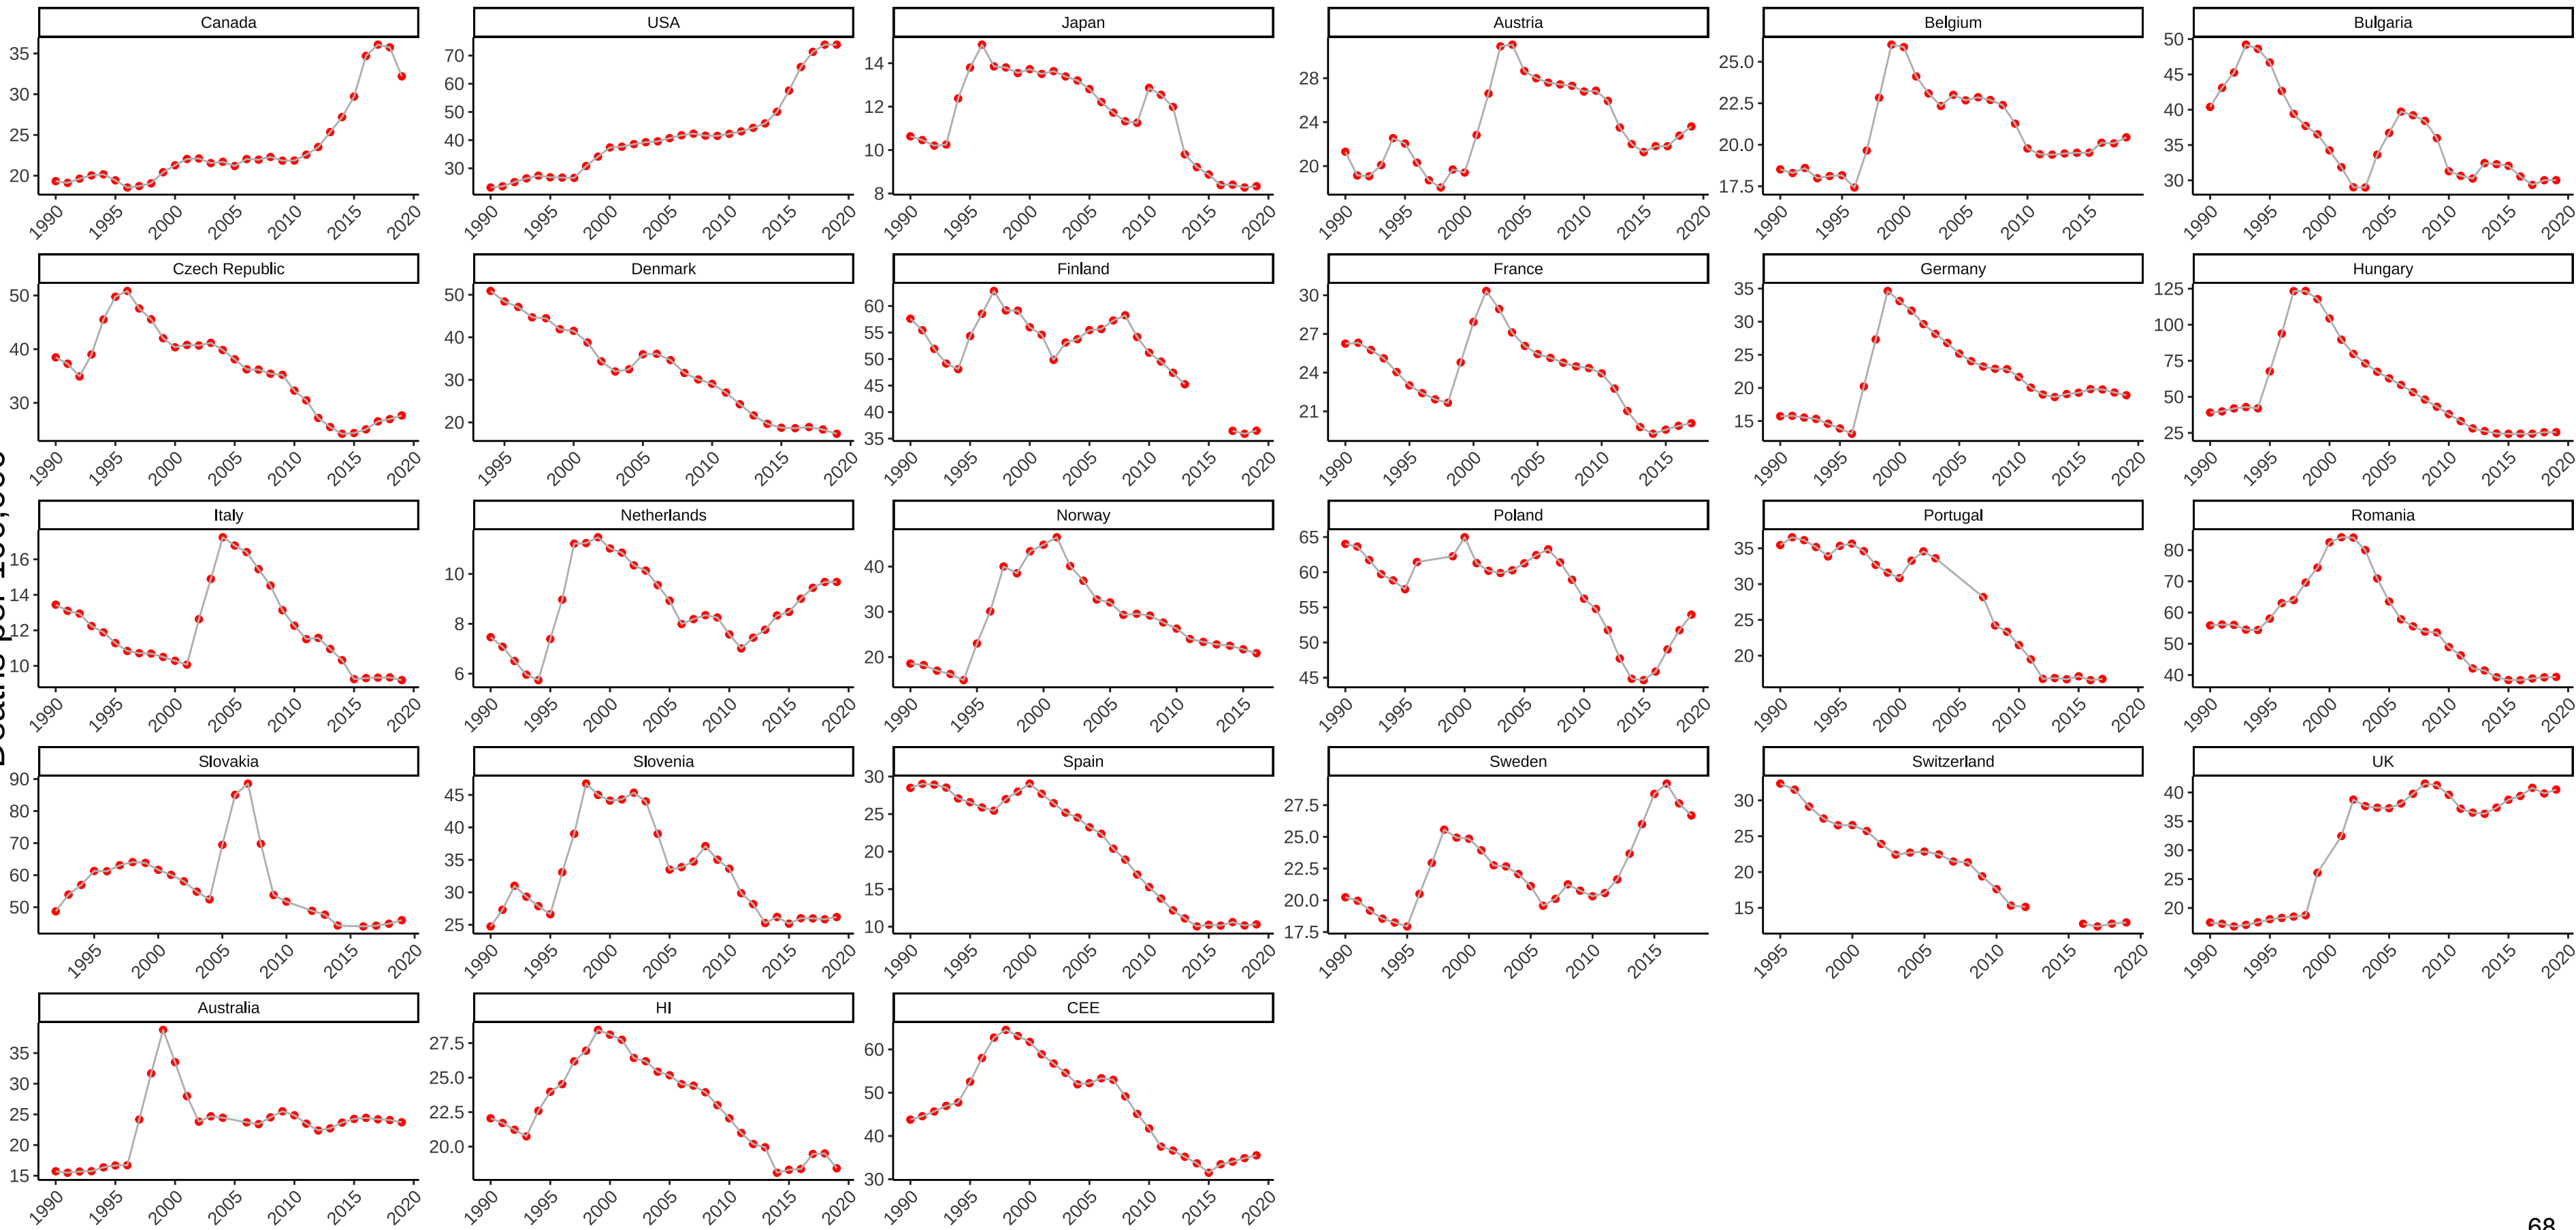

**Figure S62. Three-Year Moving Average of Female Mortality from Other External Causes at Ages 25-44**

Deaths per 100,000

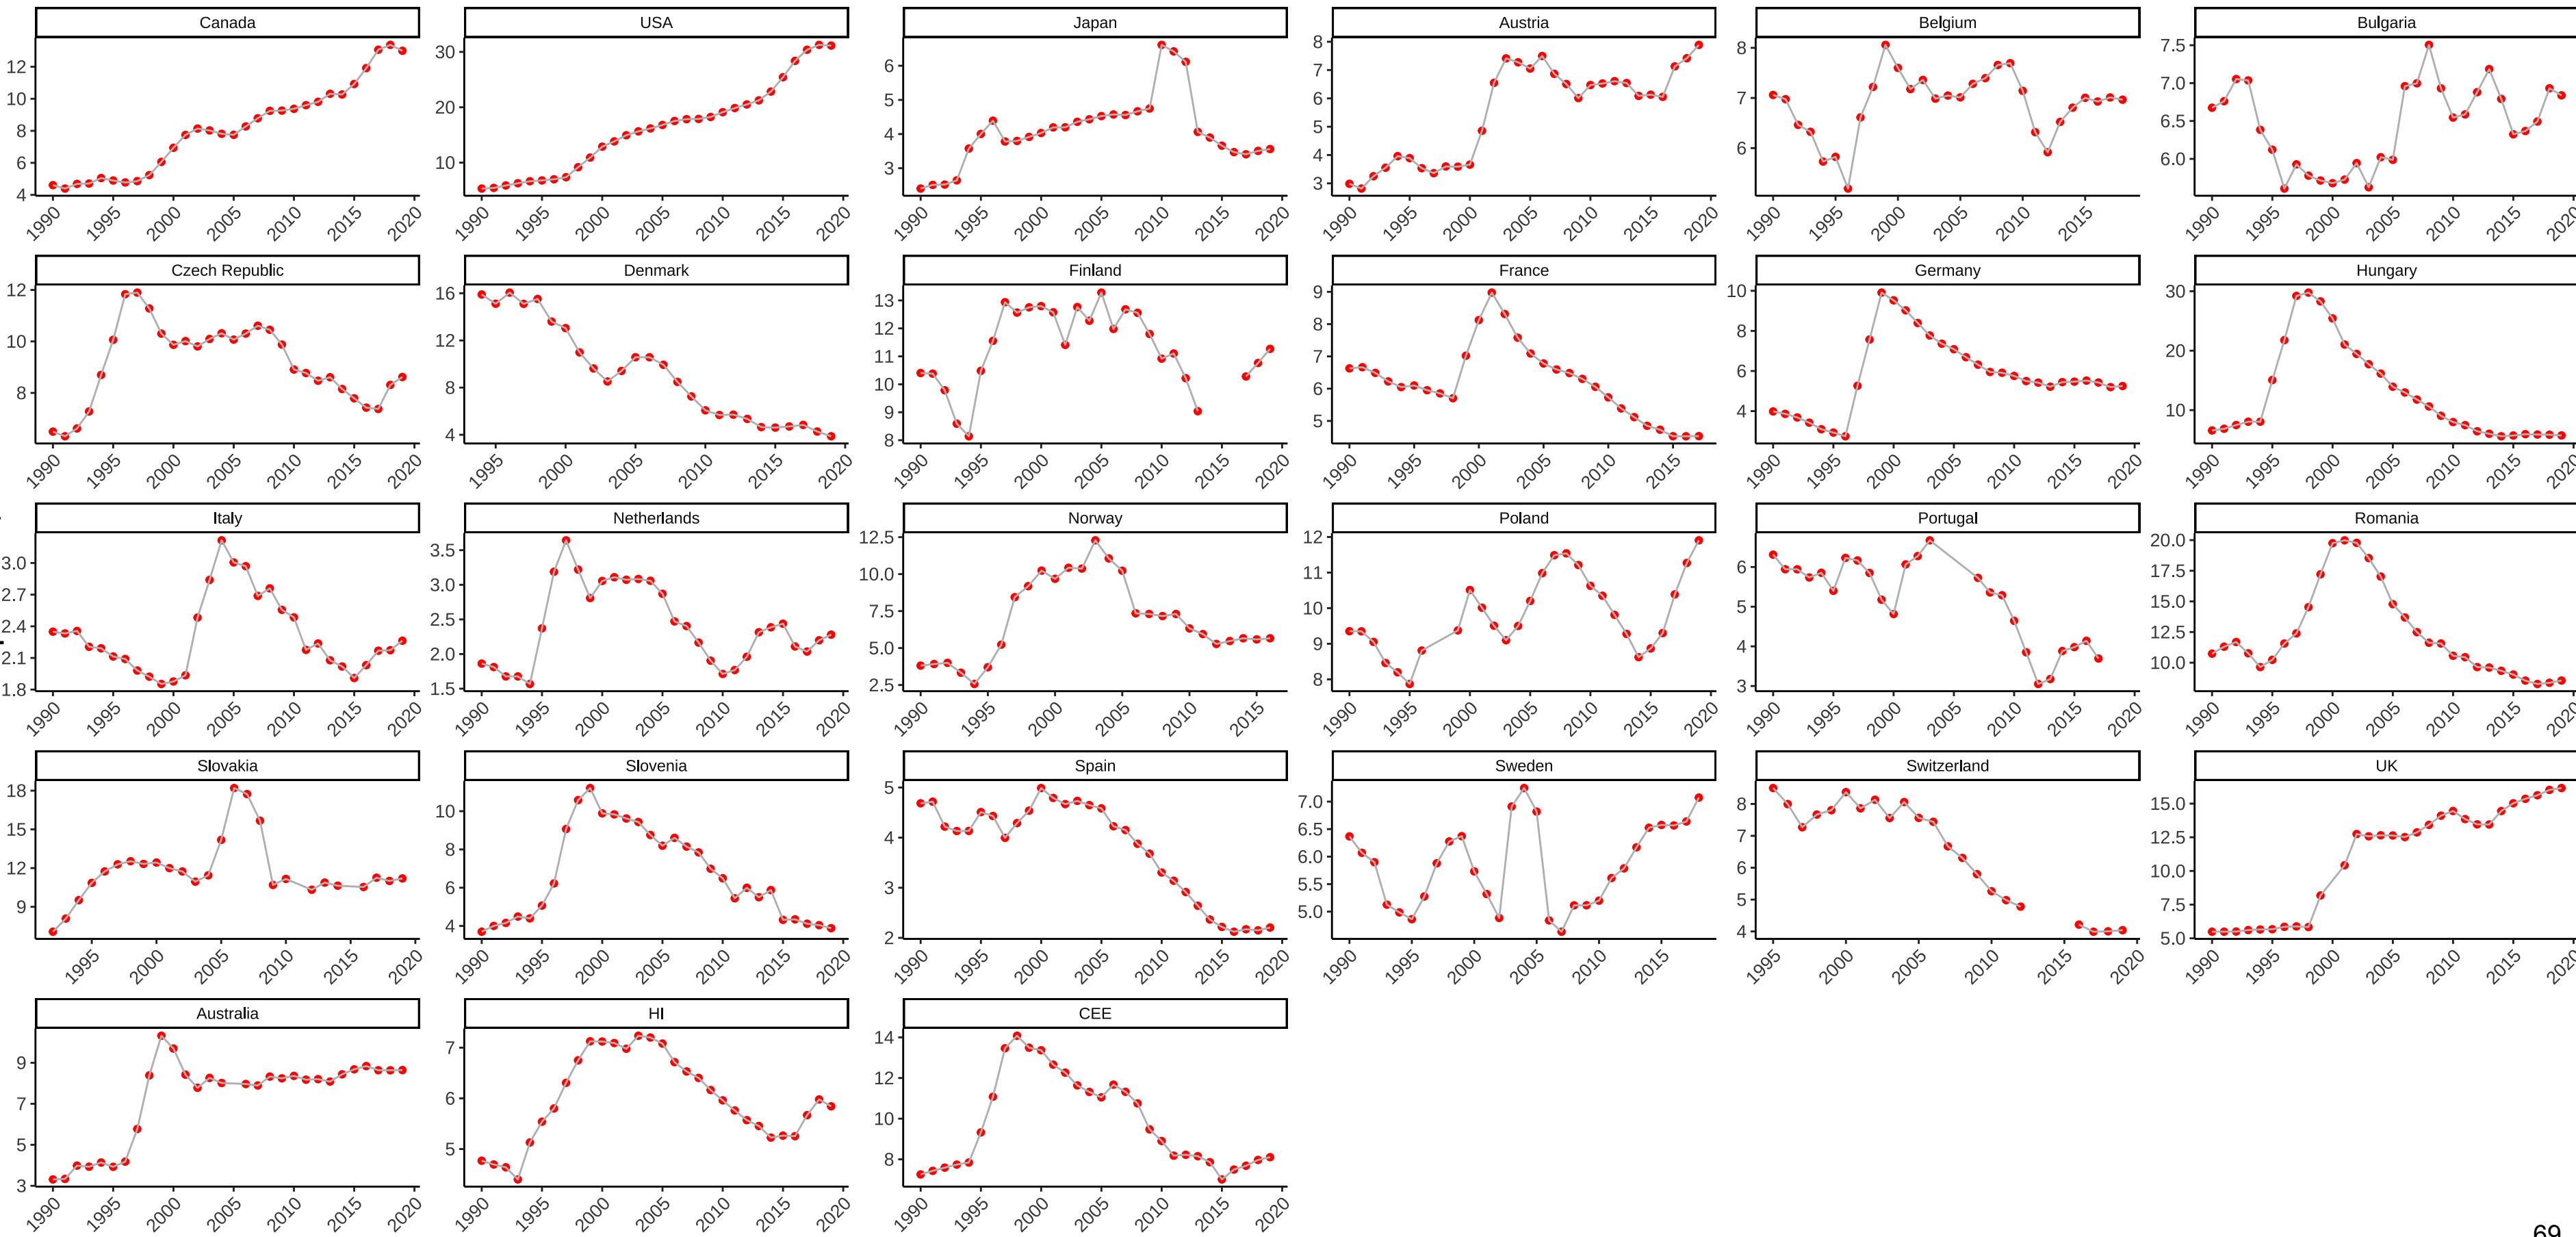

**Figure S63. Three-Year Moving Average of Male Mortality from All Other Causes at Ages 25-44**

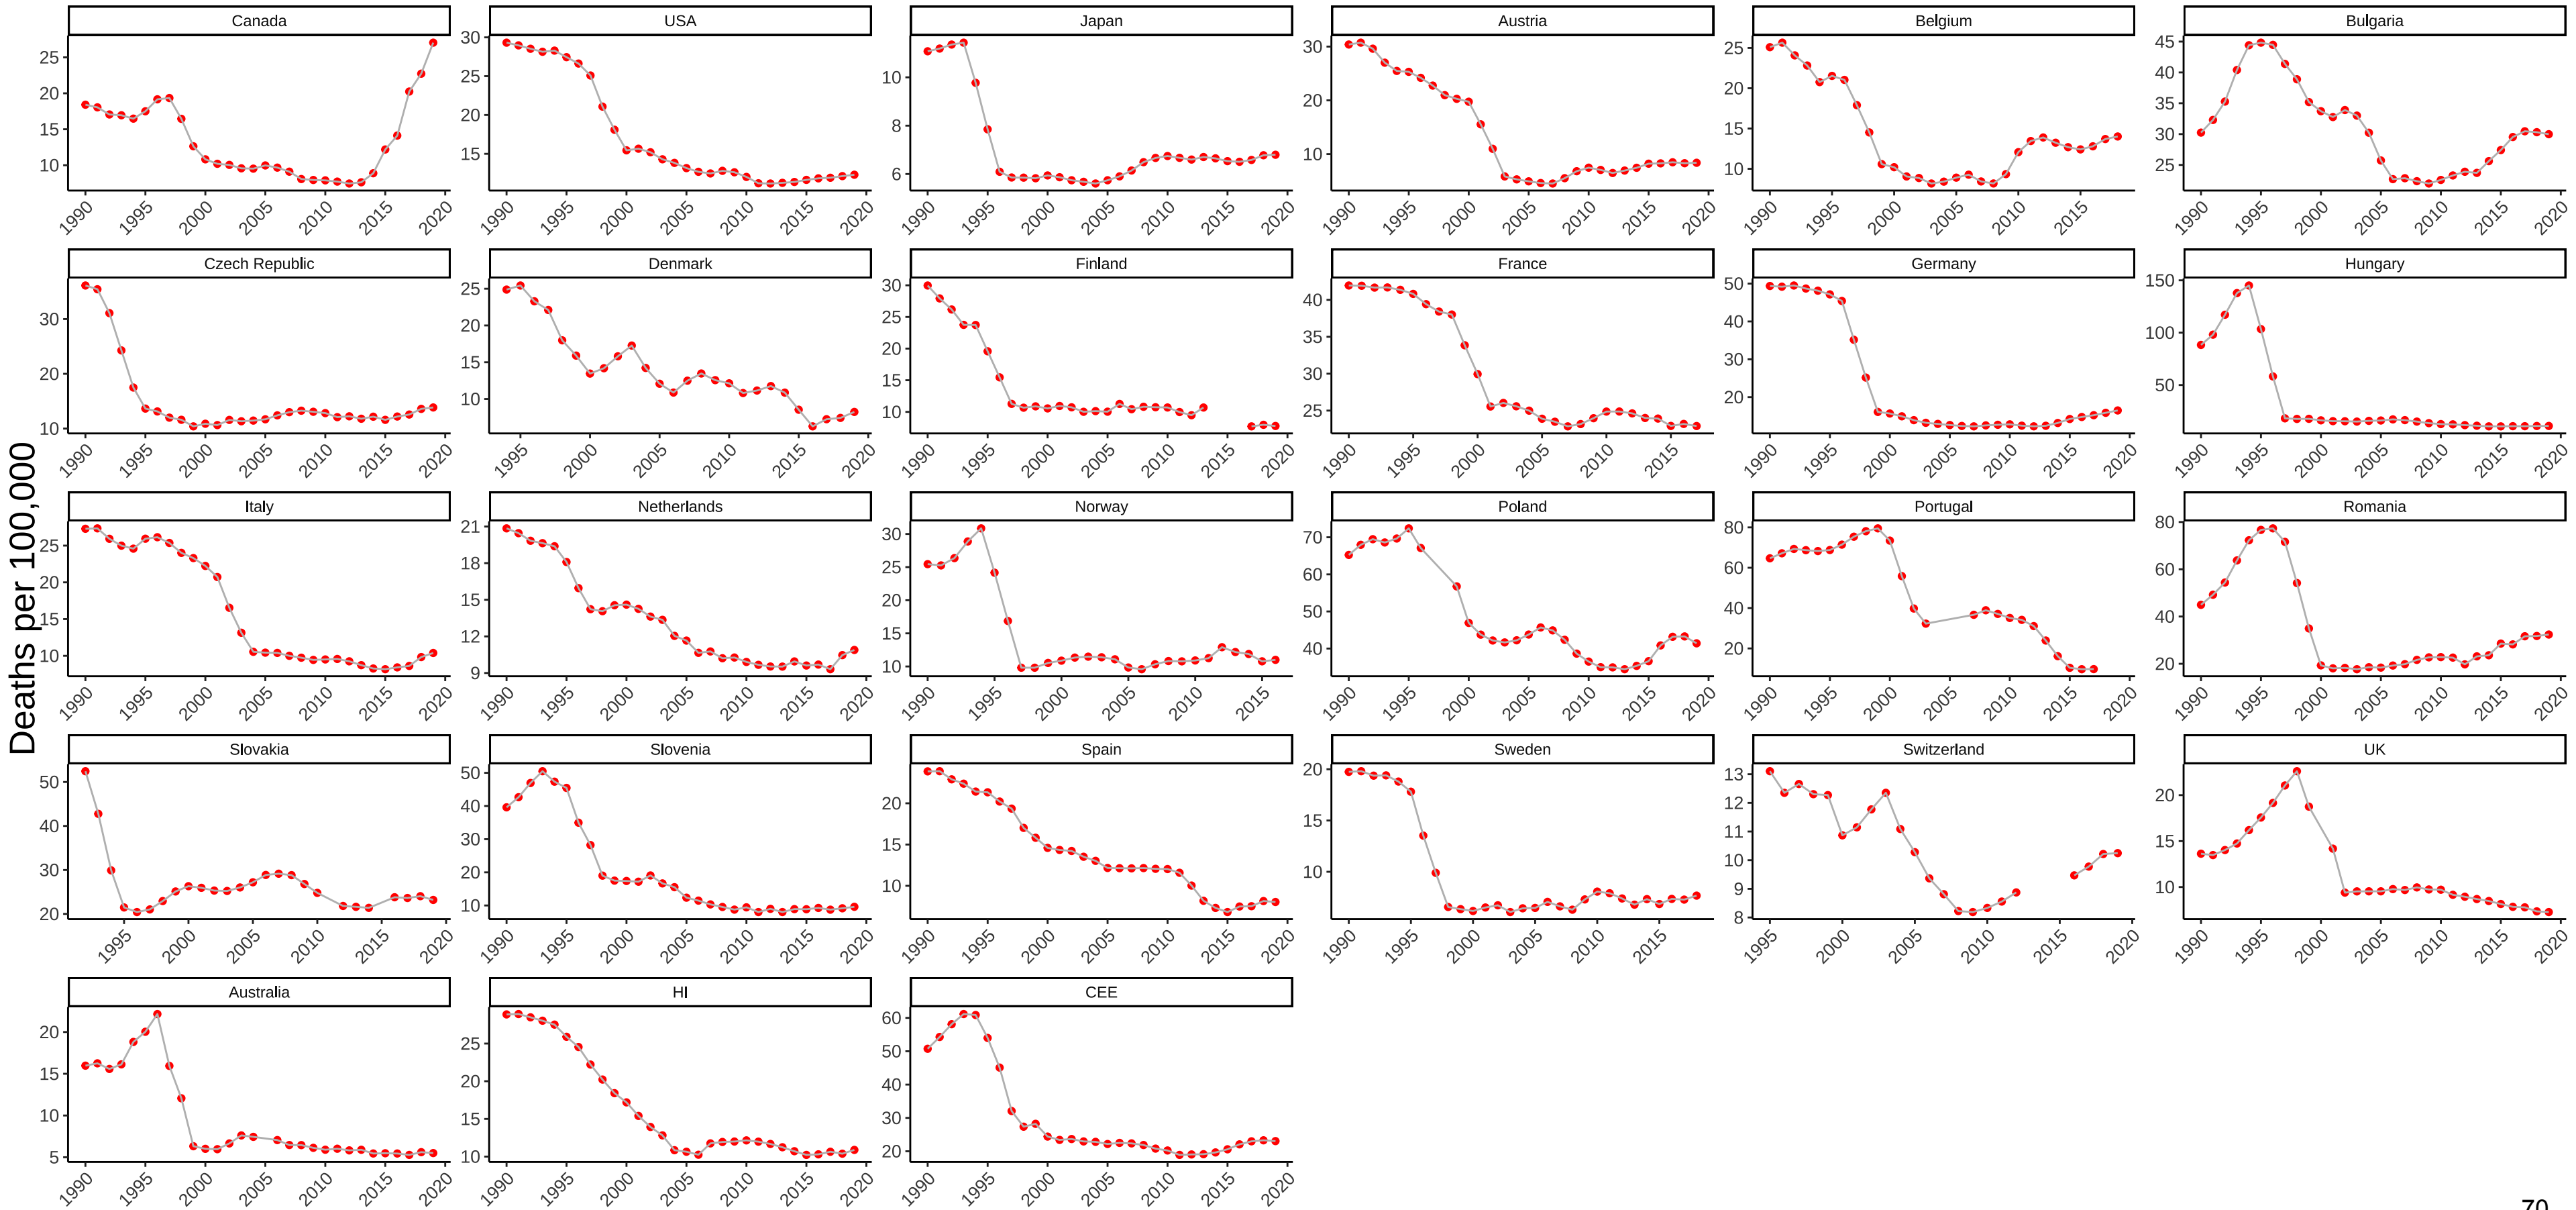

**Figure S64. Three-Year Moving Average of Female Mortality from All Other Causes at Ages 25-44**

Deaths per 100,000

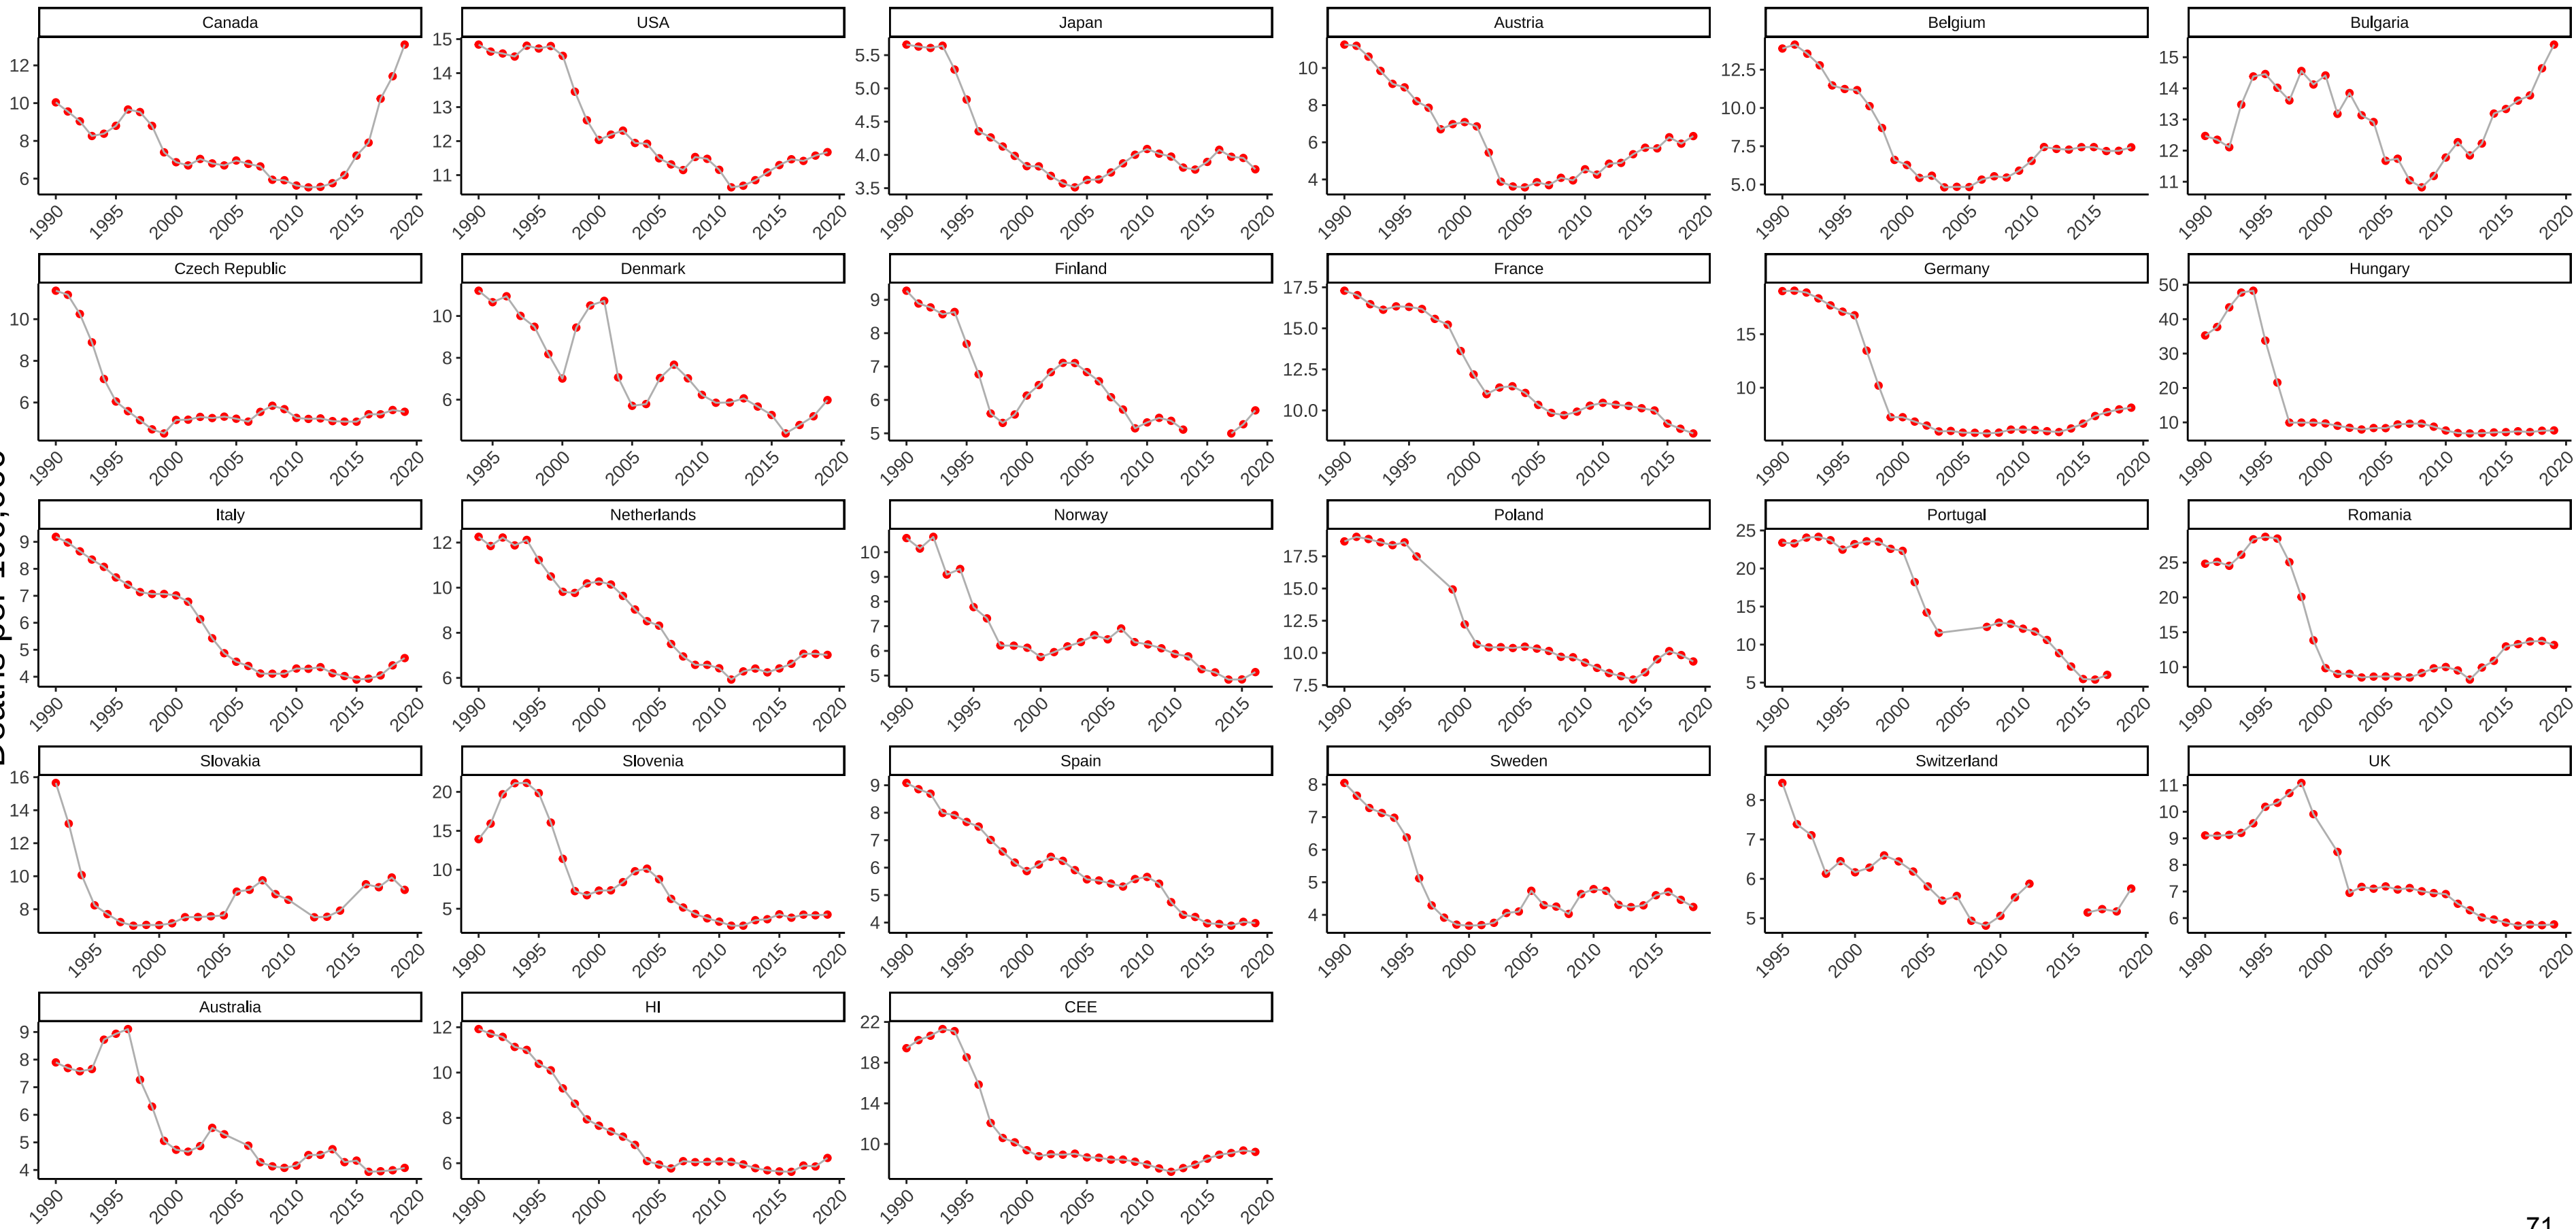

Year

**Figure S65. Three-Year Moving Average of Male Mortality from All Causes at Ages 25-44**

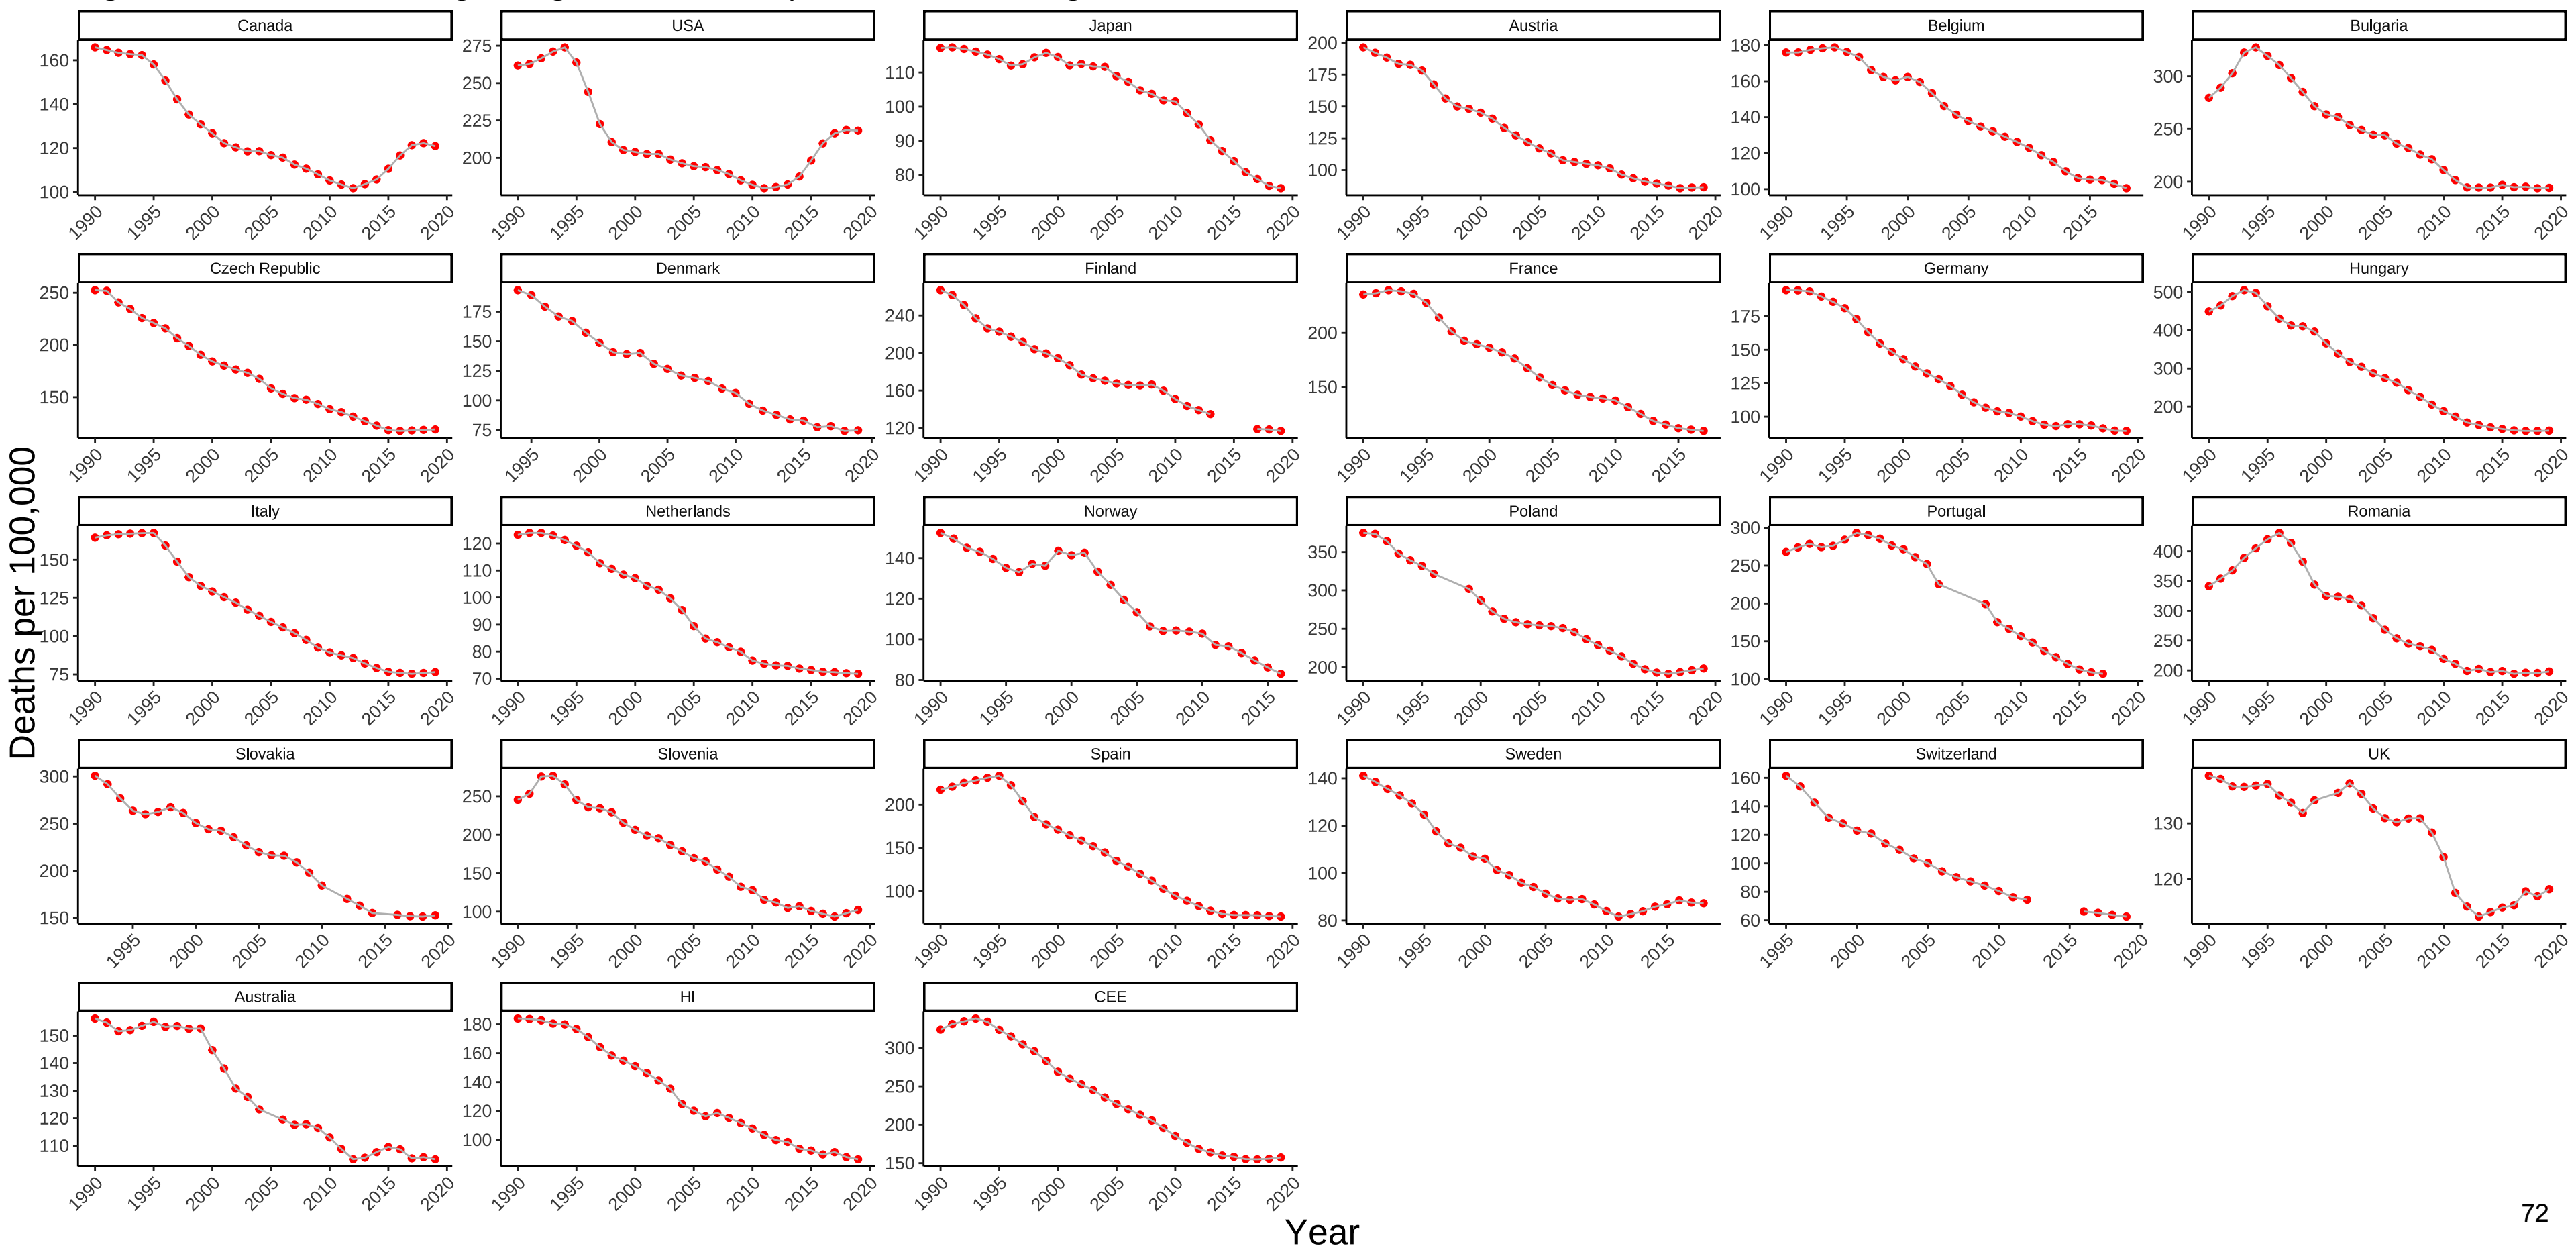

**Figure S66. Three-Year Moving Average of Female Mortality from All Causes at Ages 25-44**

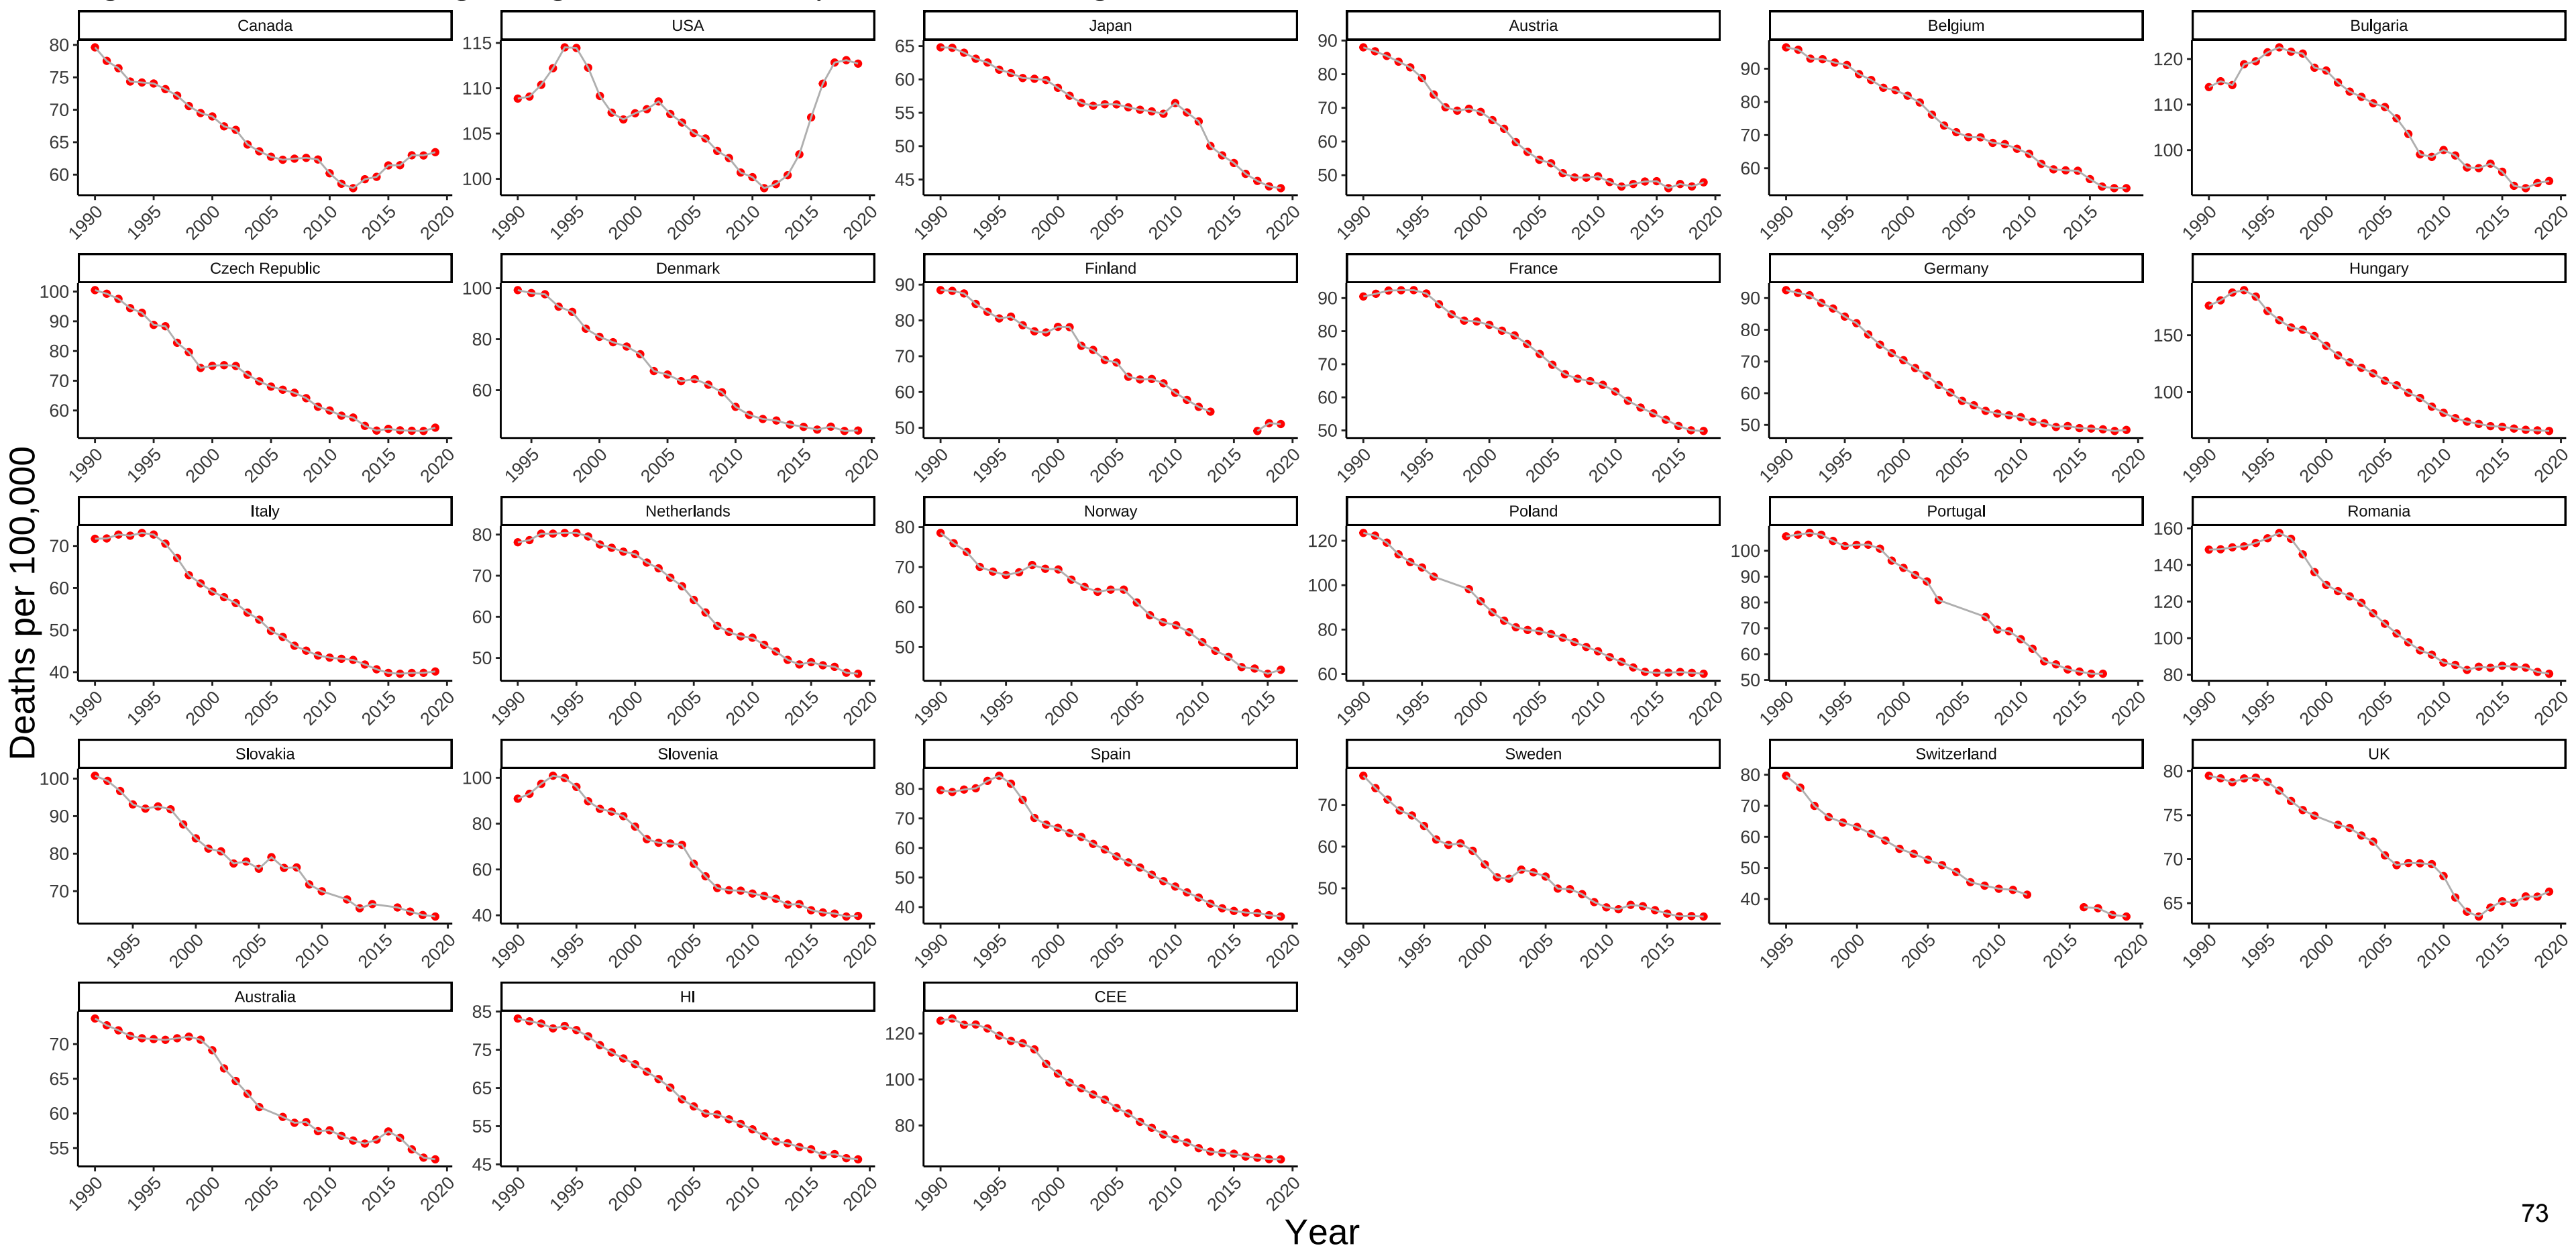

**Figure S67. Three-Year Moving Average of Male Mortality from Infectious and Parasitic Diseases at Ages 45-54**

Deaths per 100,000

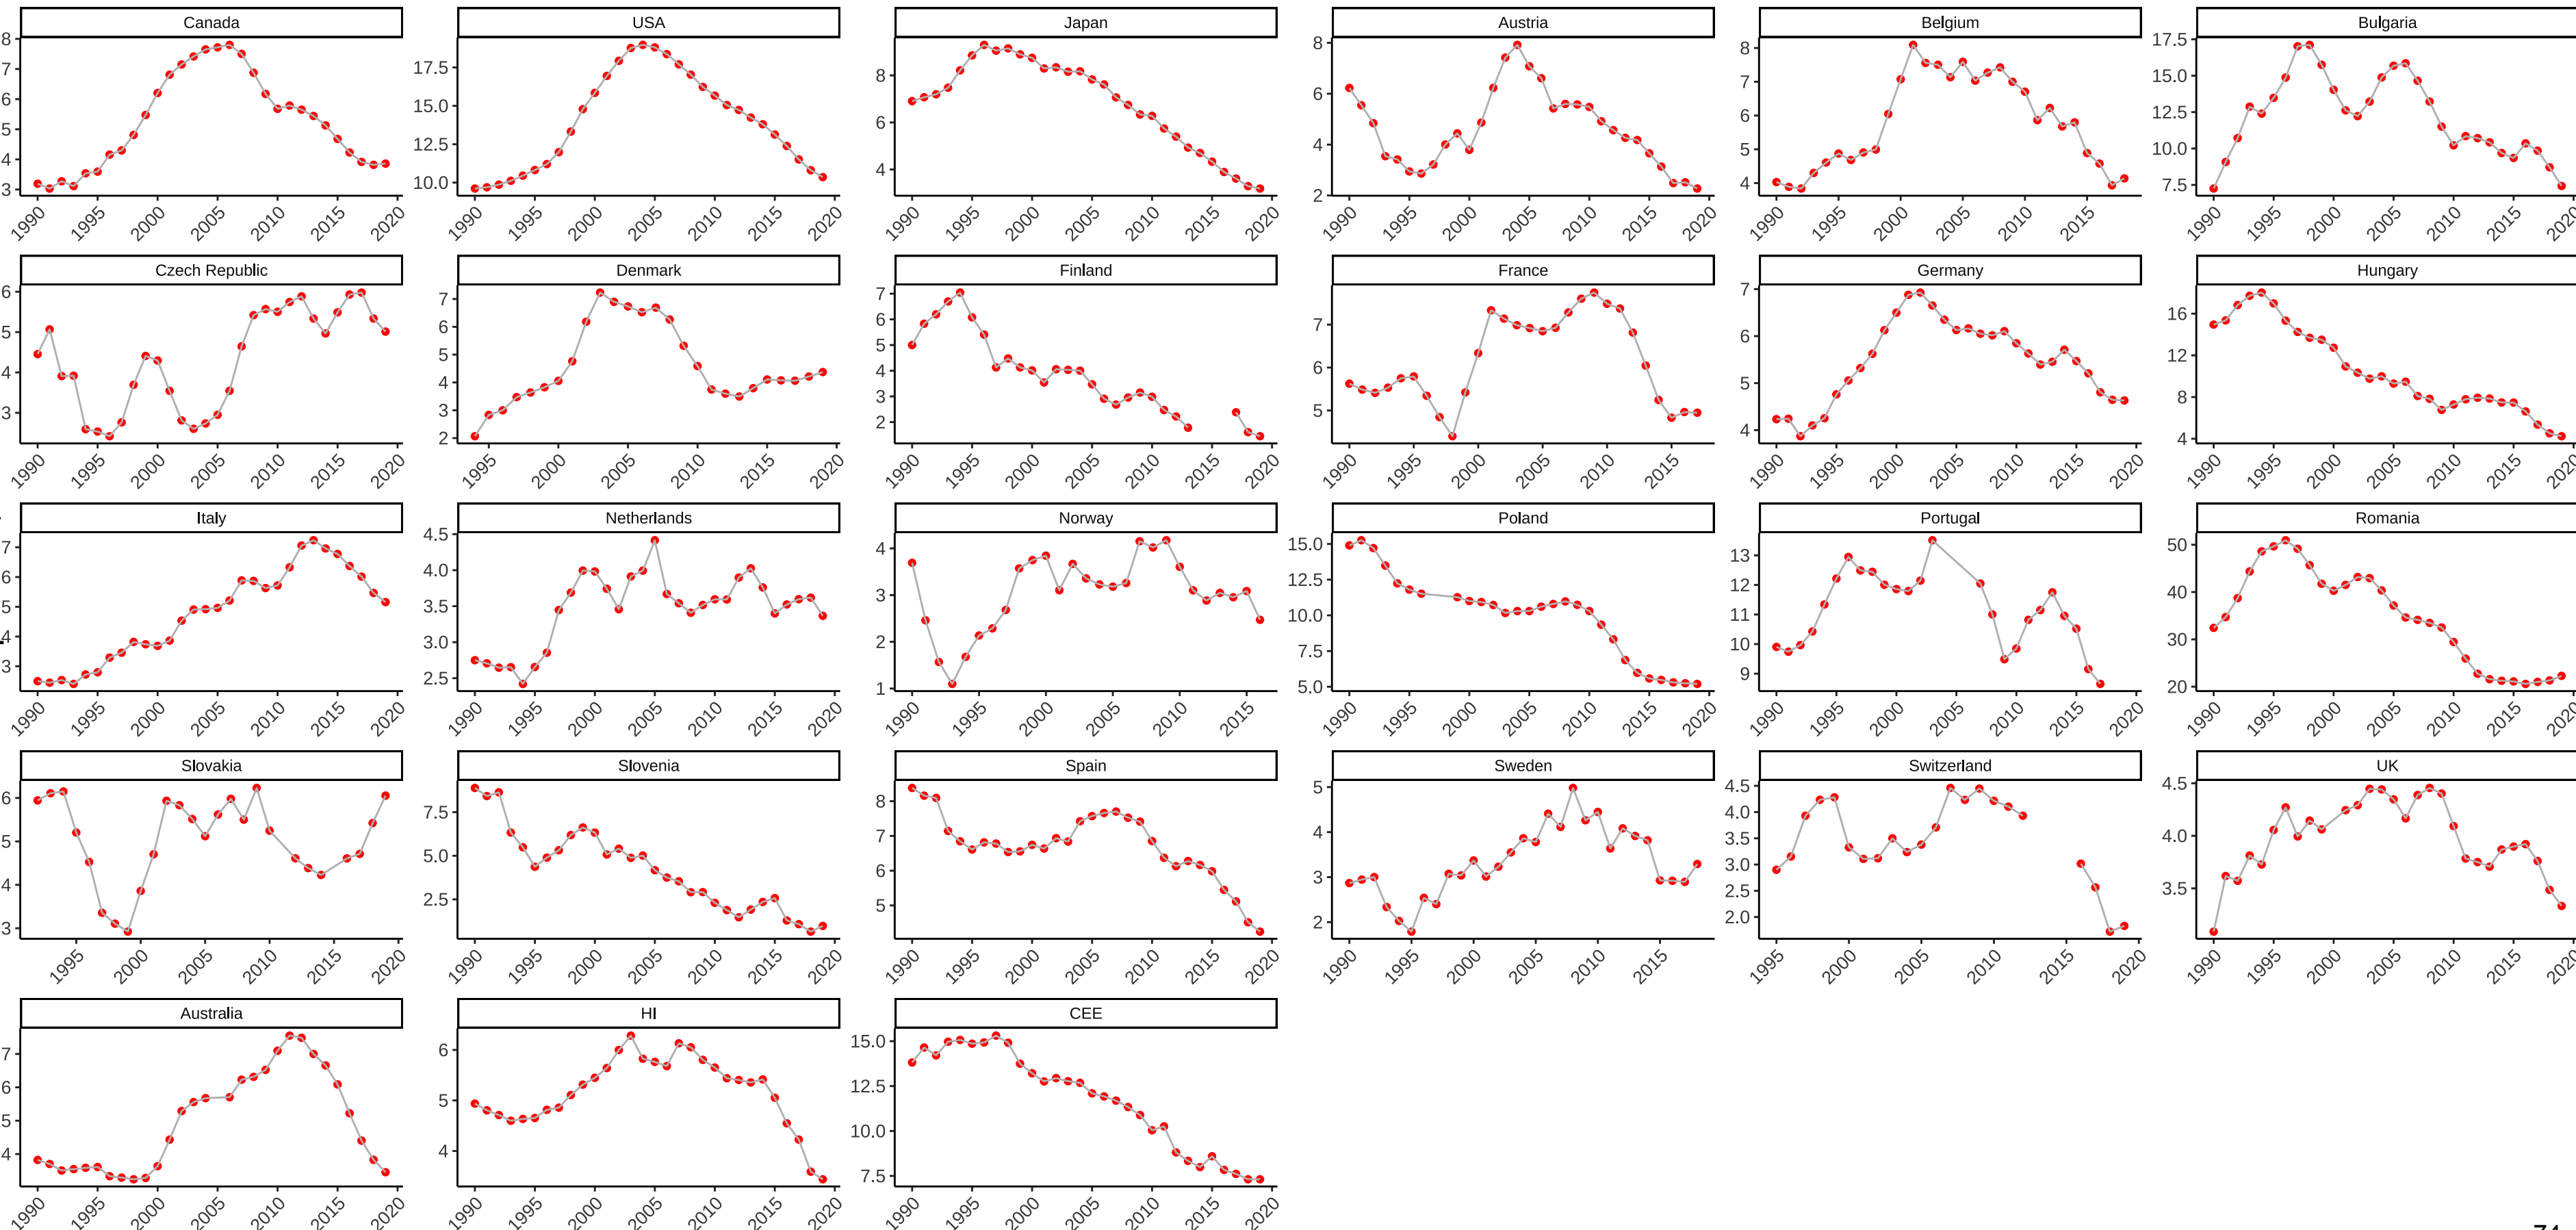

Year

**Figure S68. Three-Year Moving Average of Female Mortality from Infectious and Parasitic Diseases at Ages 45-54**

Deaths per 100,000

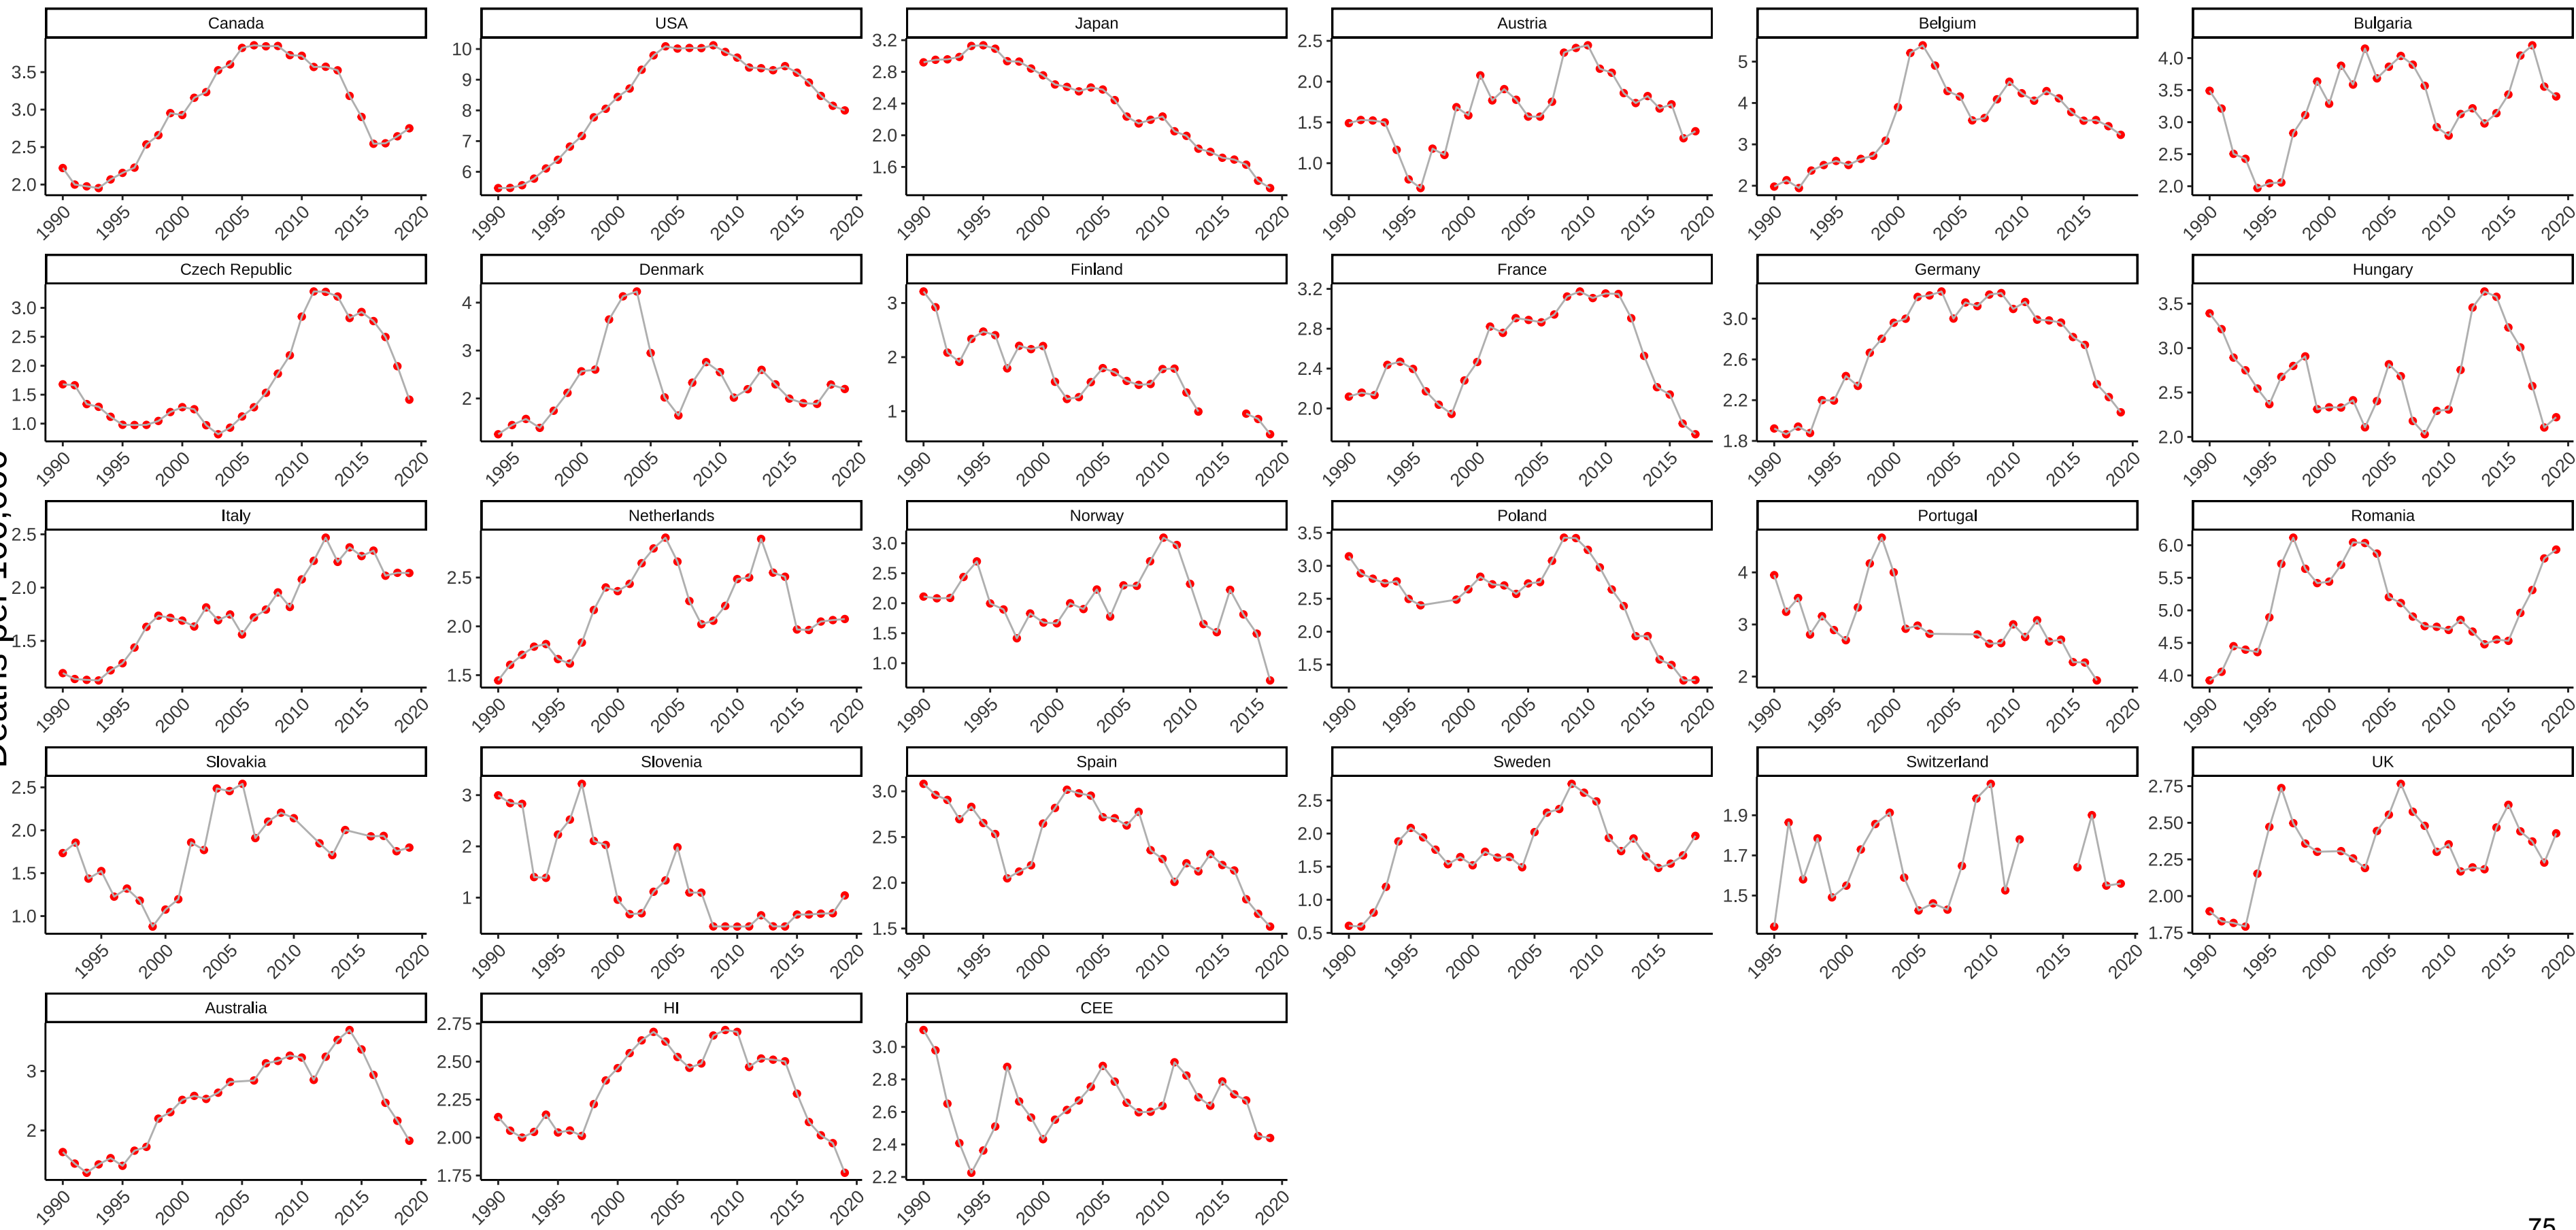

**Figure S69. Three-Year Moving Average of Male Mortality from HIV/AIDS at Ages 45-54**

Deaths per 100,000

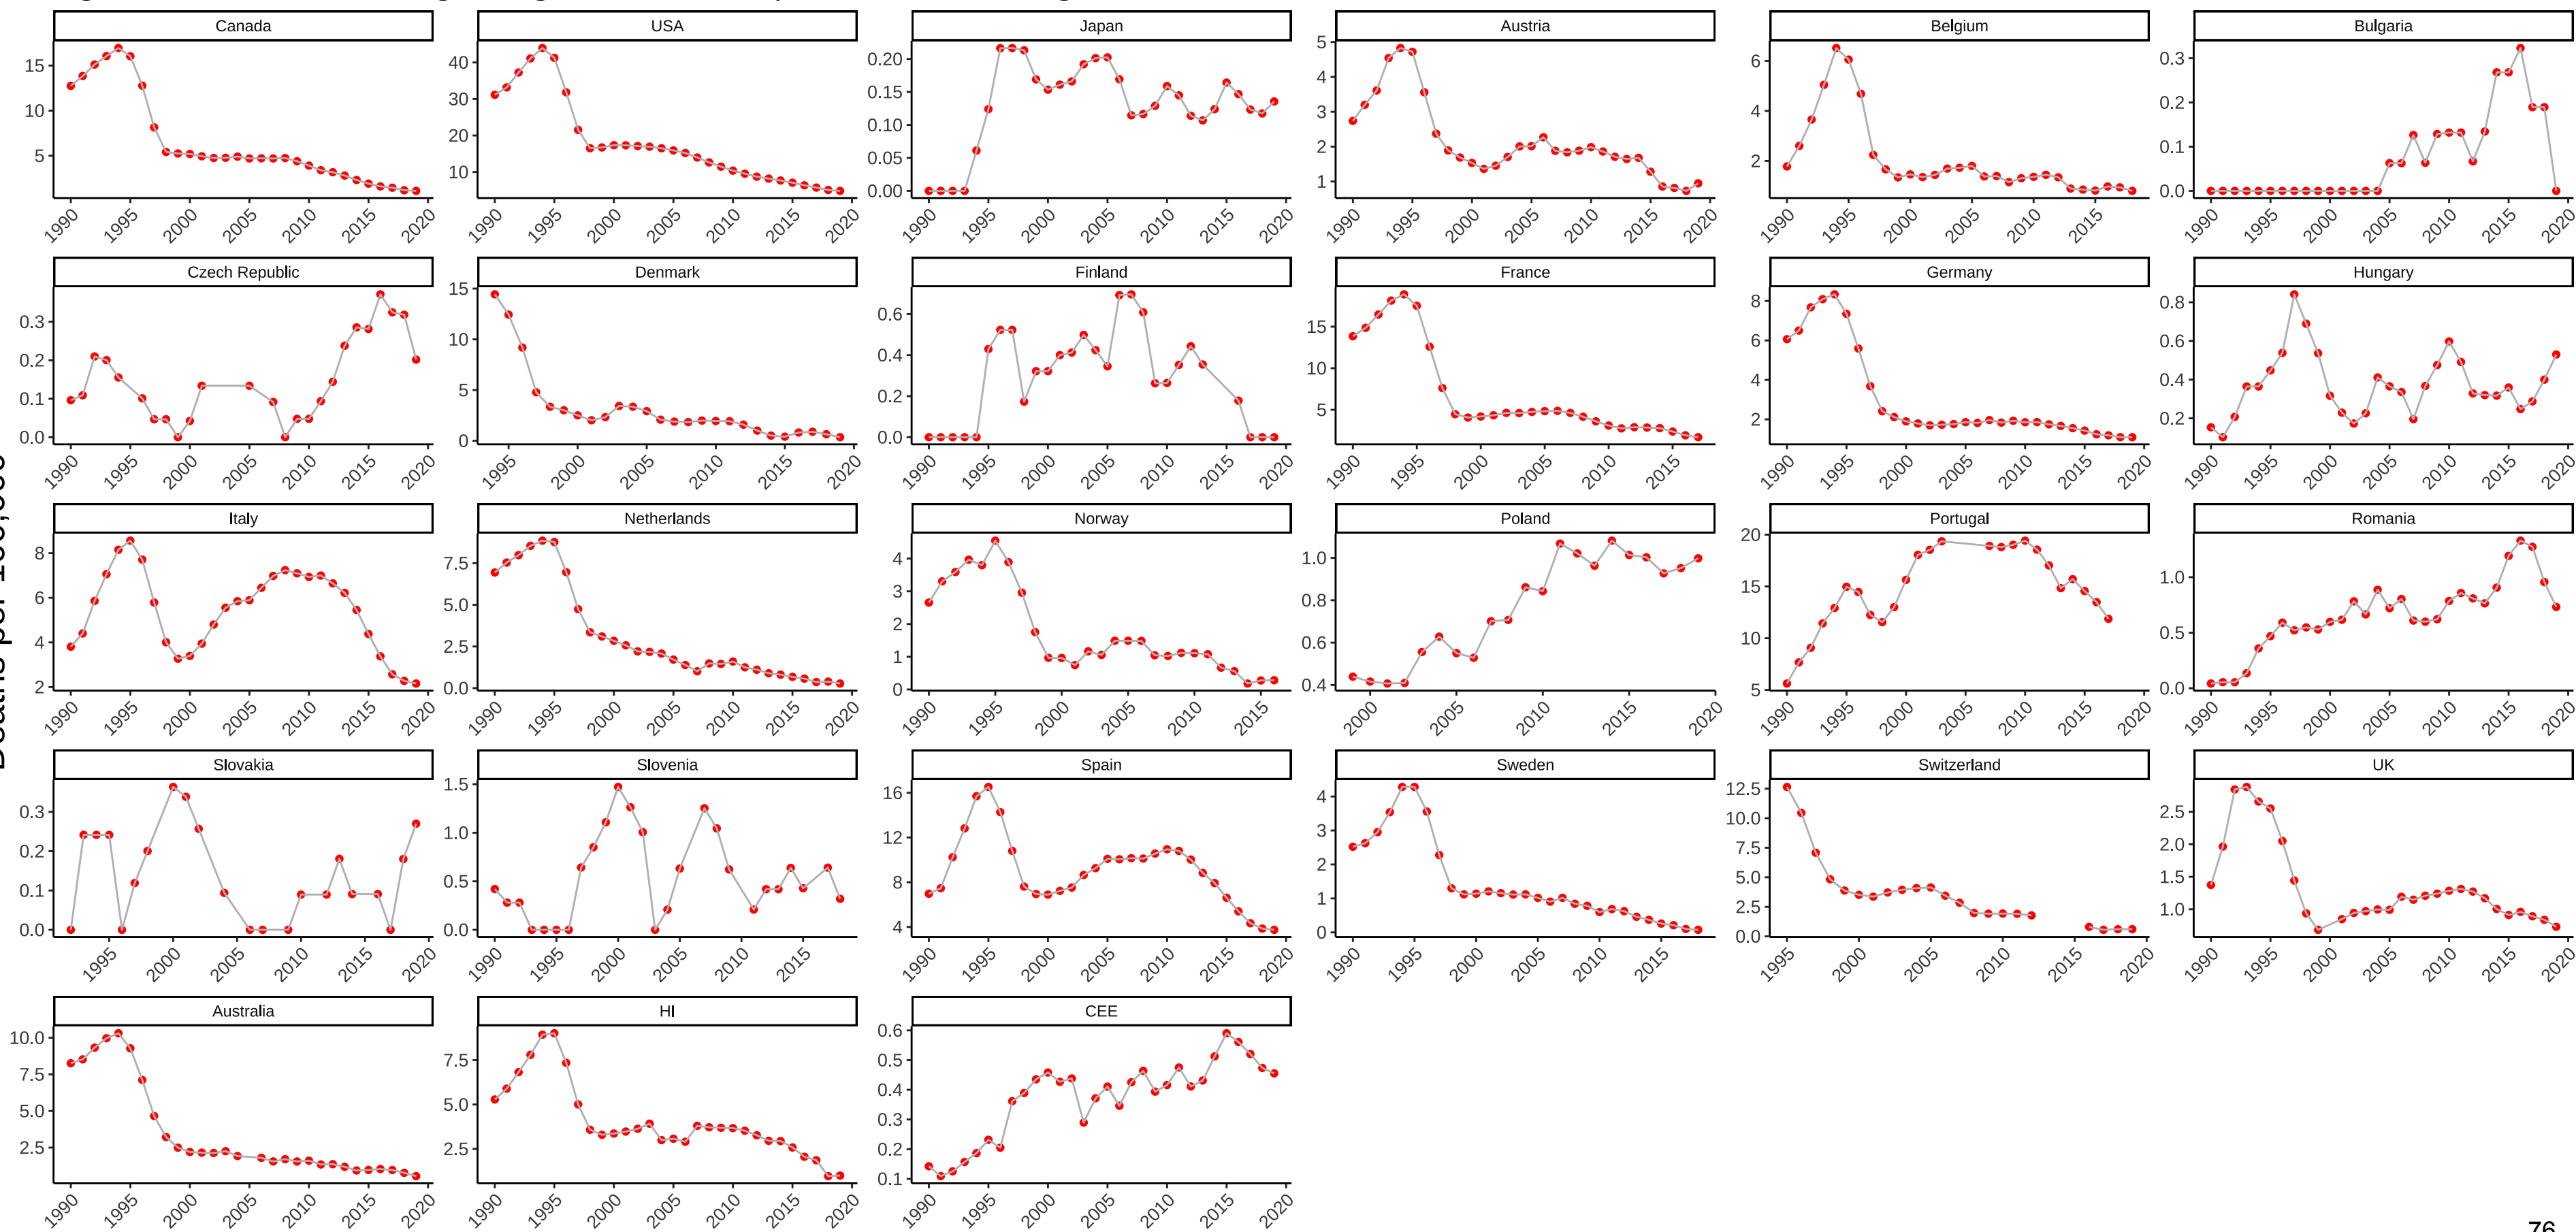

**Figure S70. Three-Year Moving Average of Female Mortality from HIV/AIDS at Ages 45-54**

Deaths per 100,000

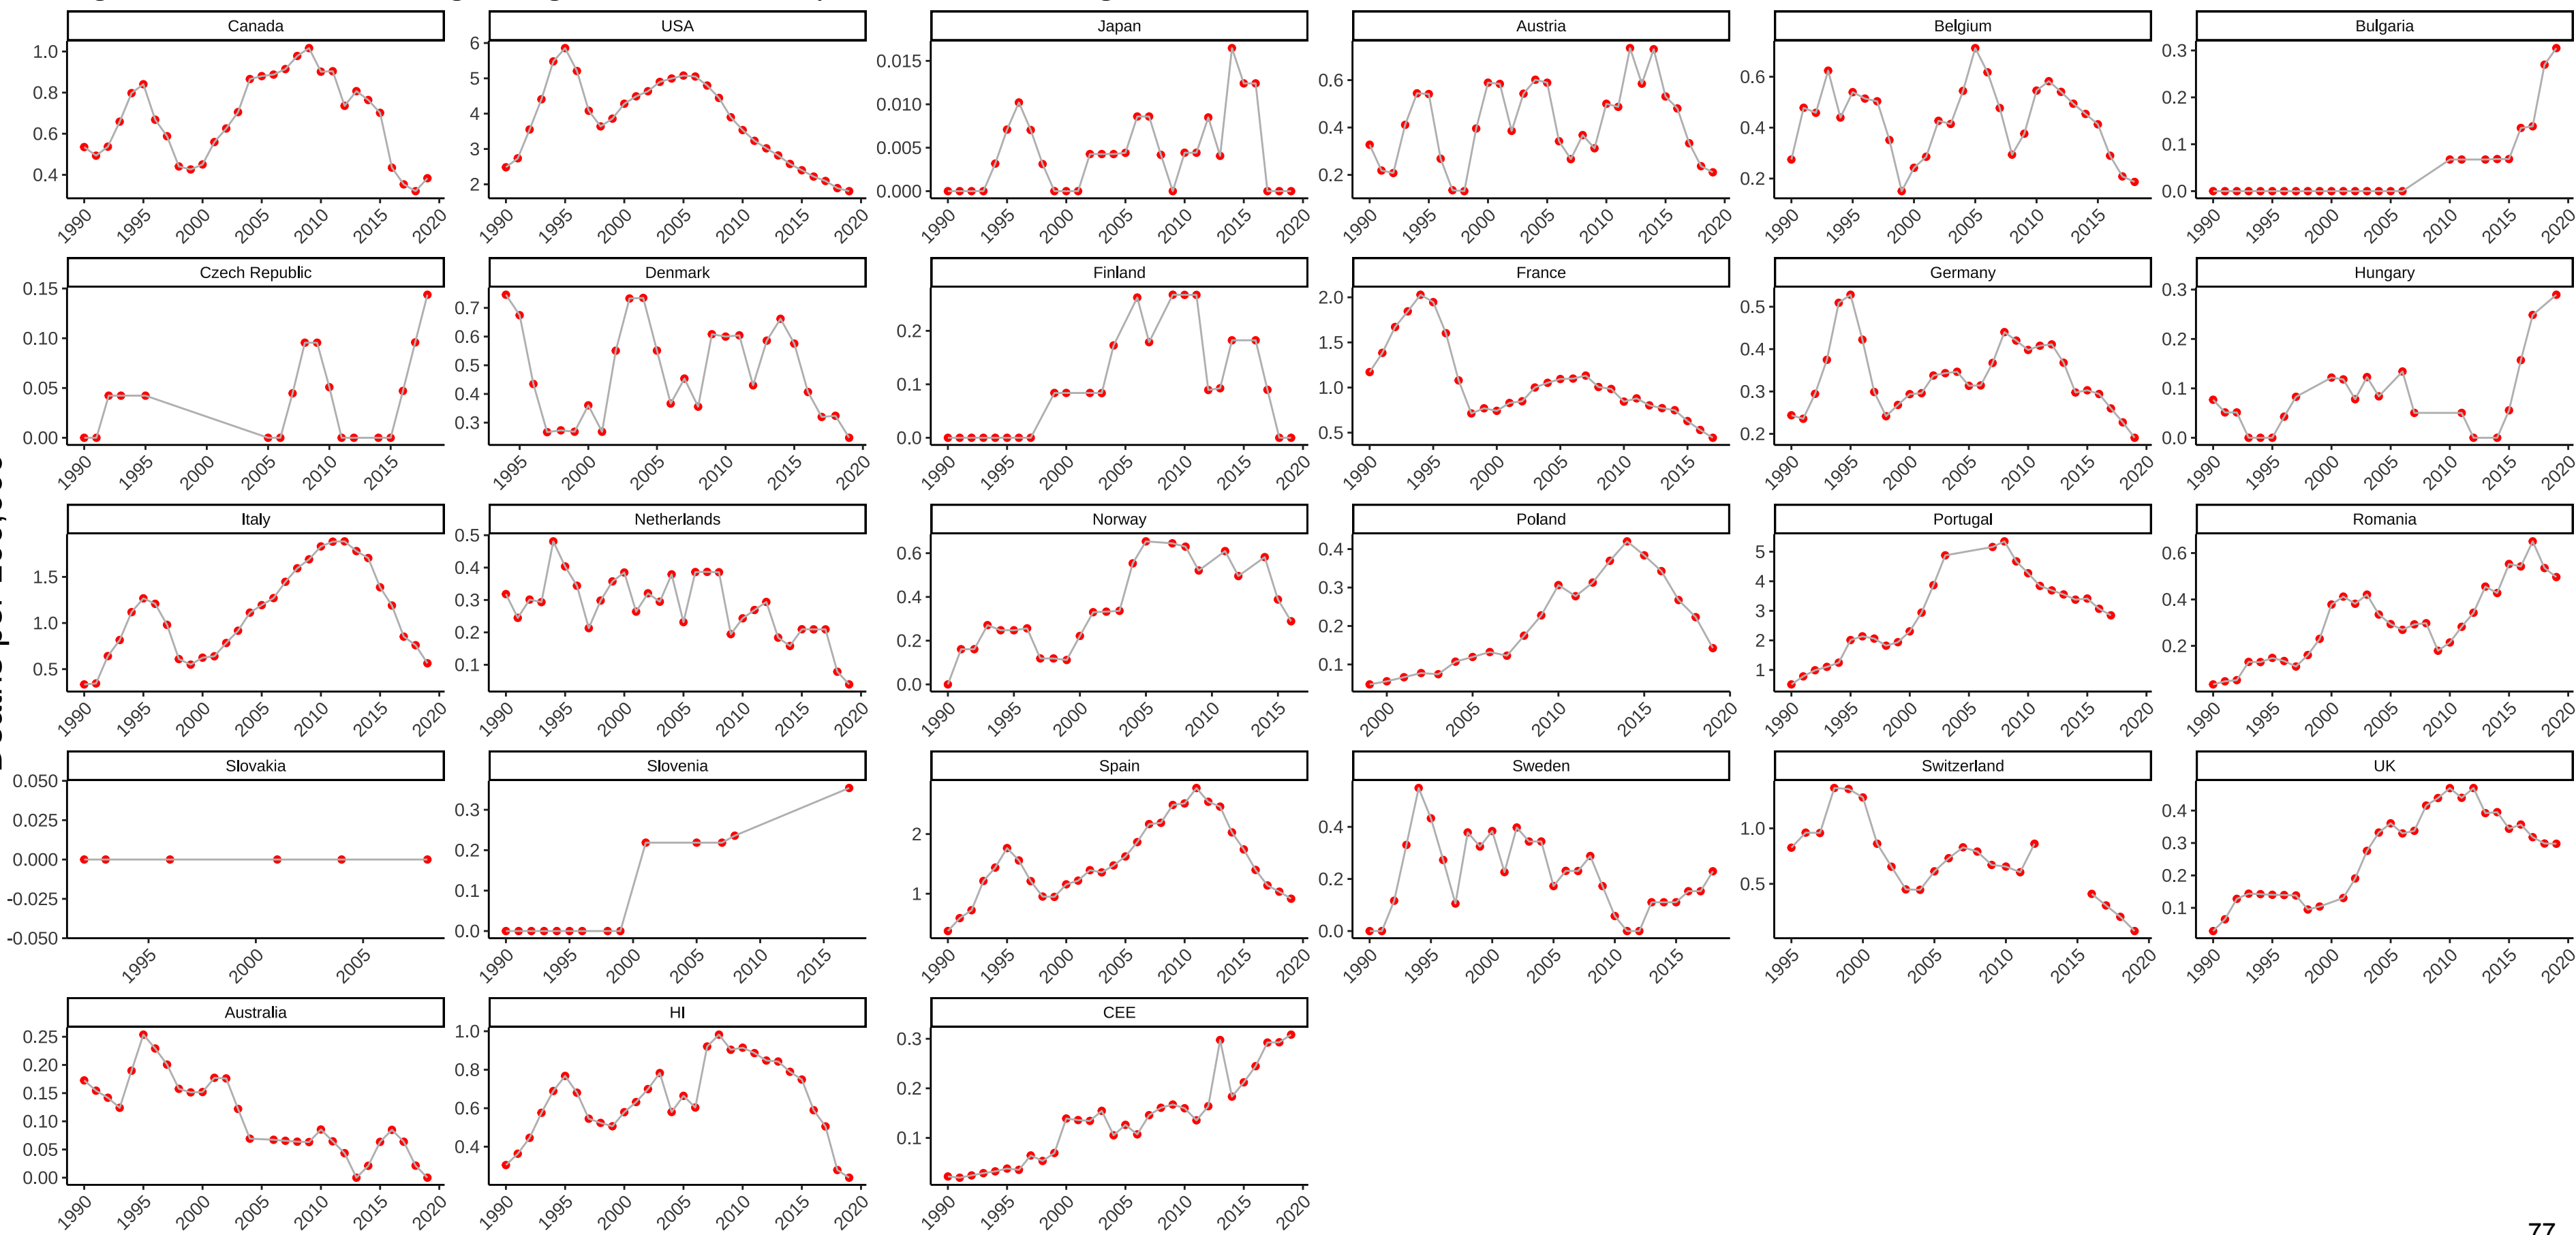

Year

**Figure S71. Three-Year Moving Average of Male Mortality from Respiratory Diseases at Ages 45-54**

Deaths per 100,000

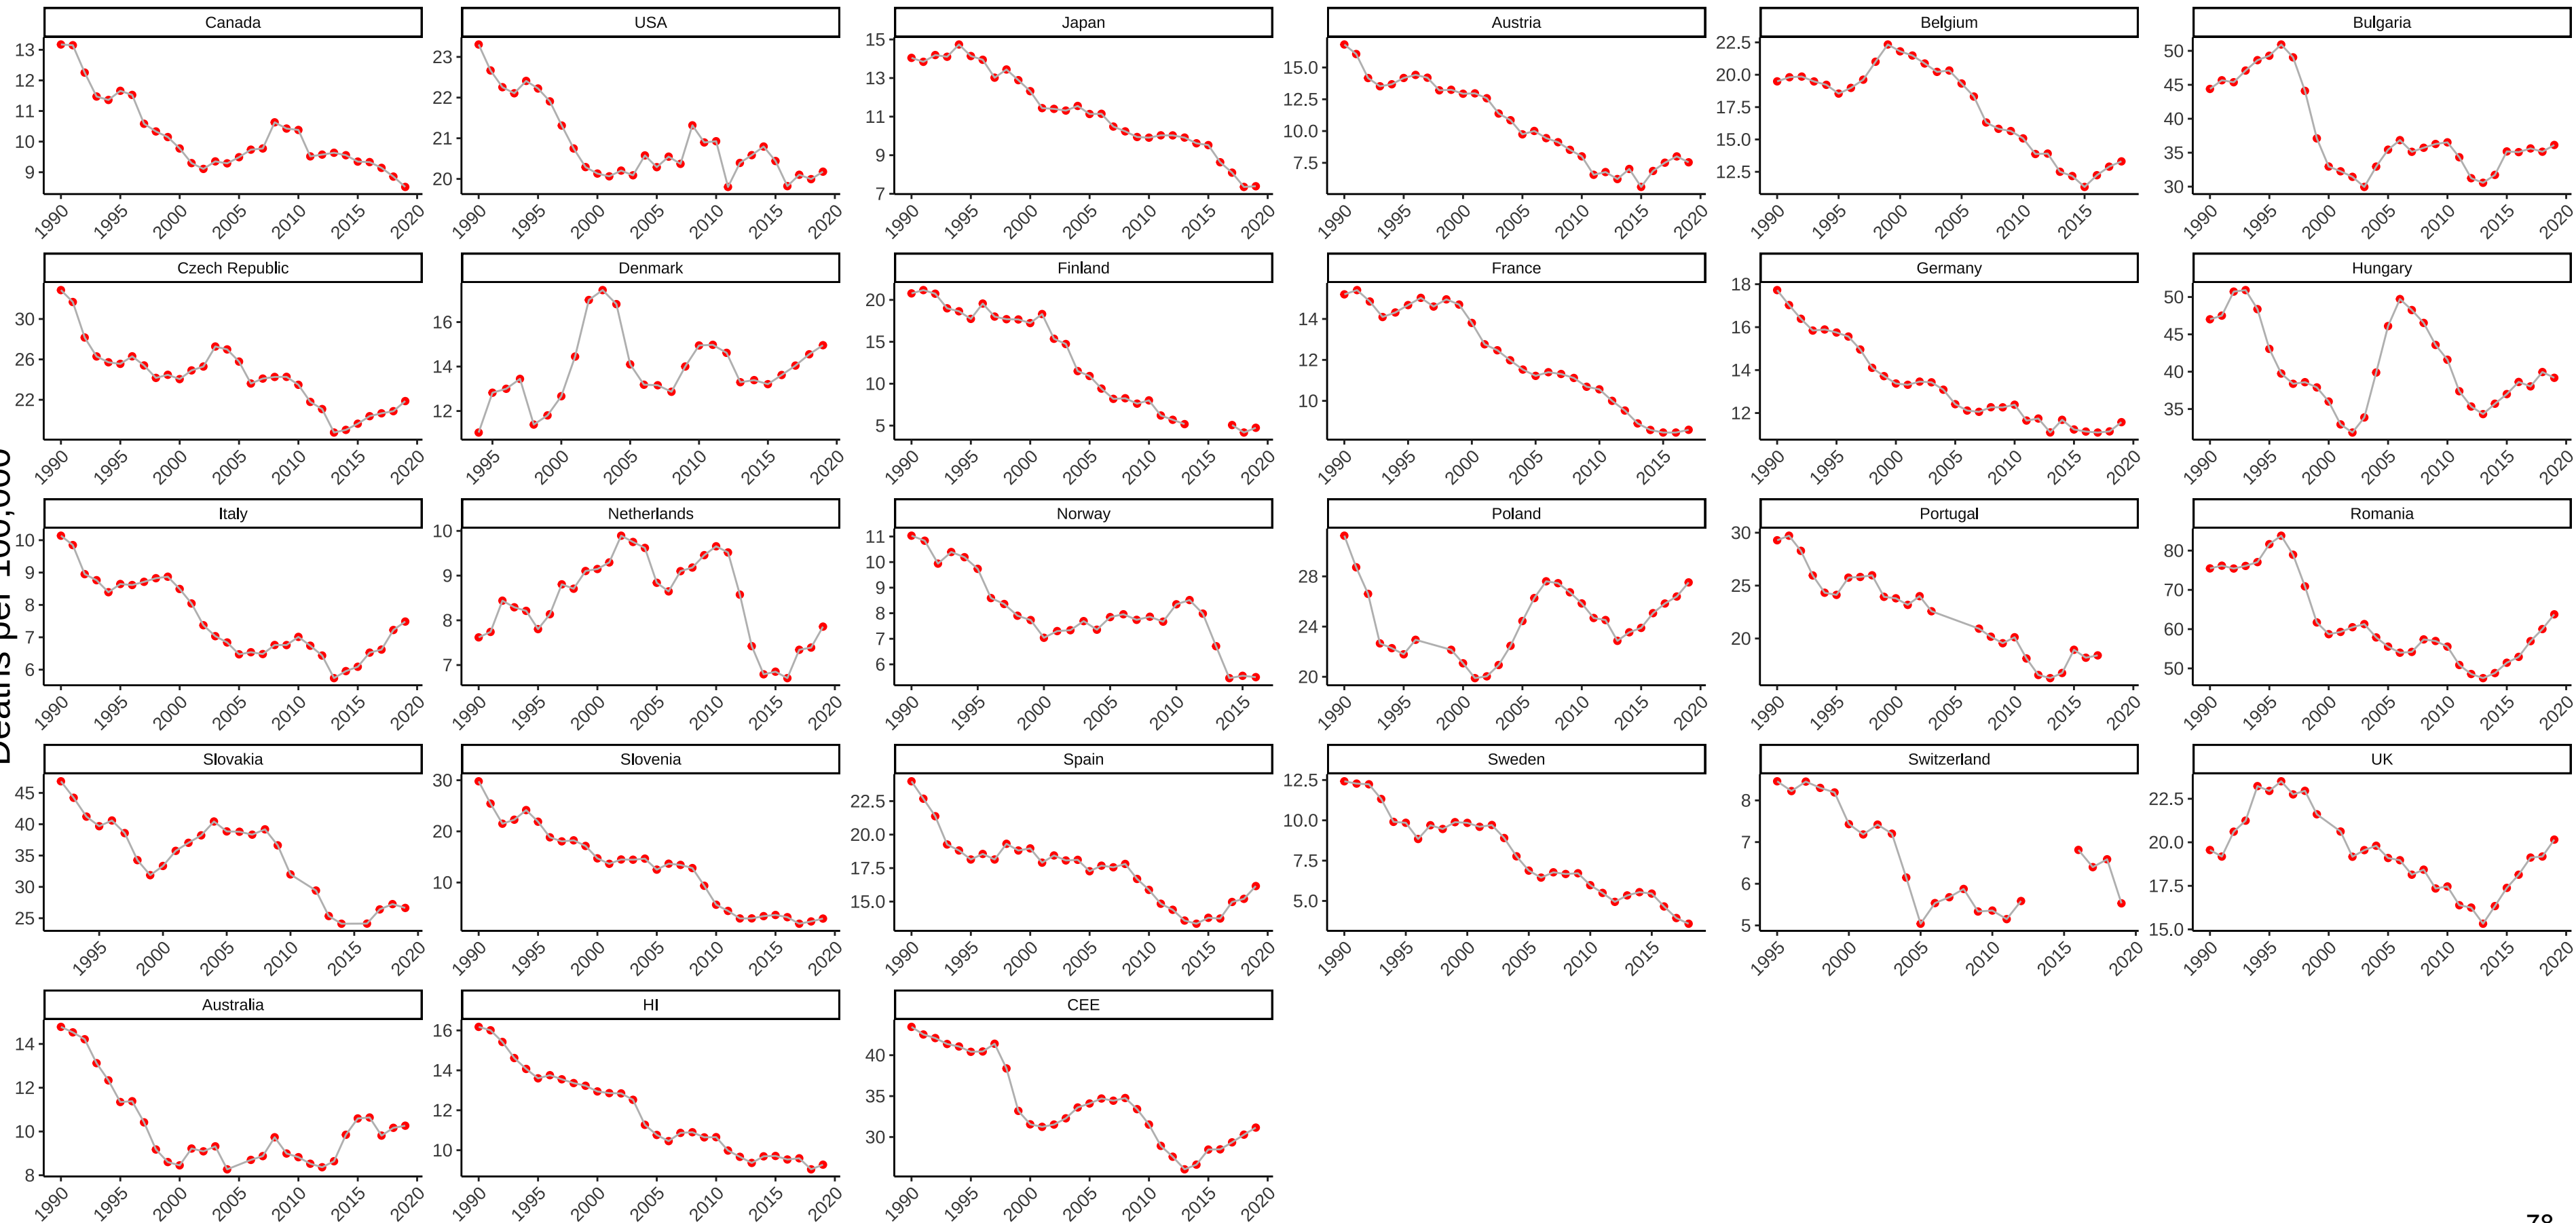

Year

**Figure S72. Three-Year Moving Average of Female Mortality from Respiratory Diseases at Ages 45-54**

Deaths per 100,000

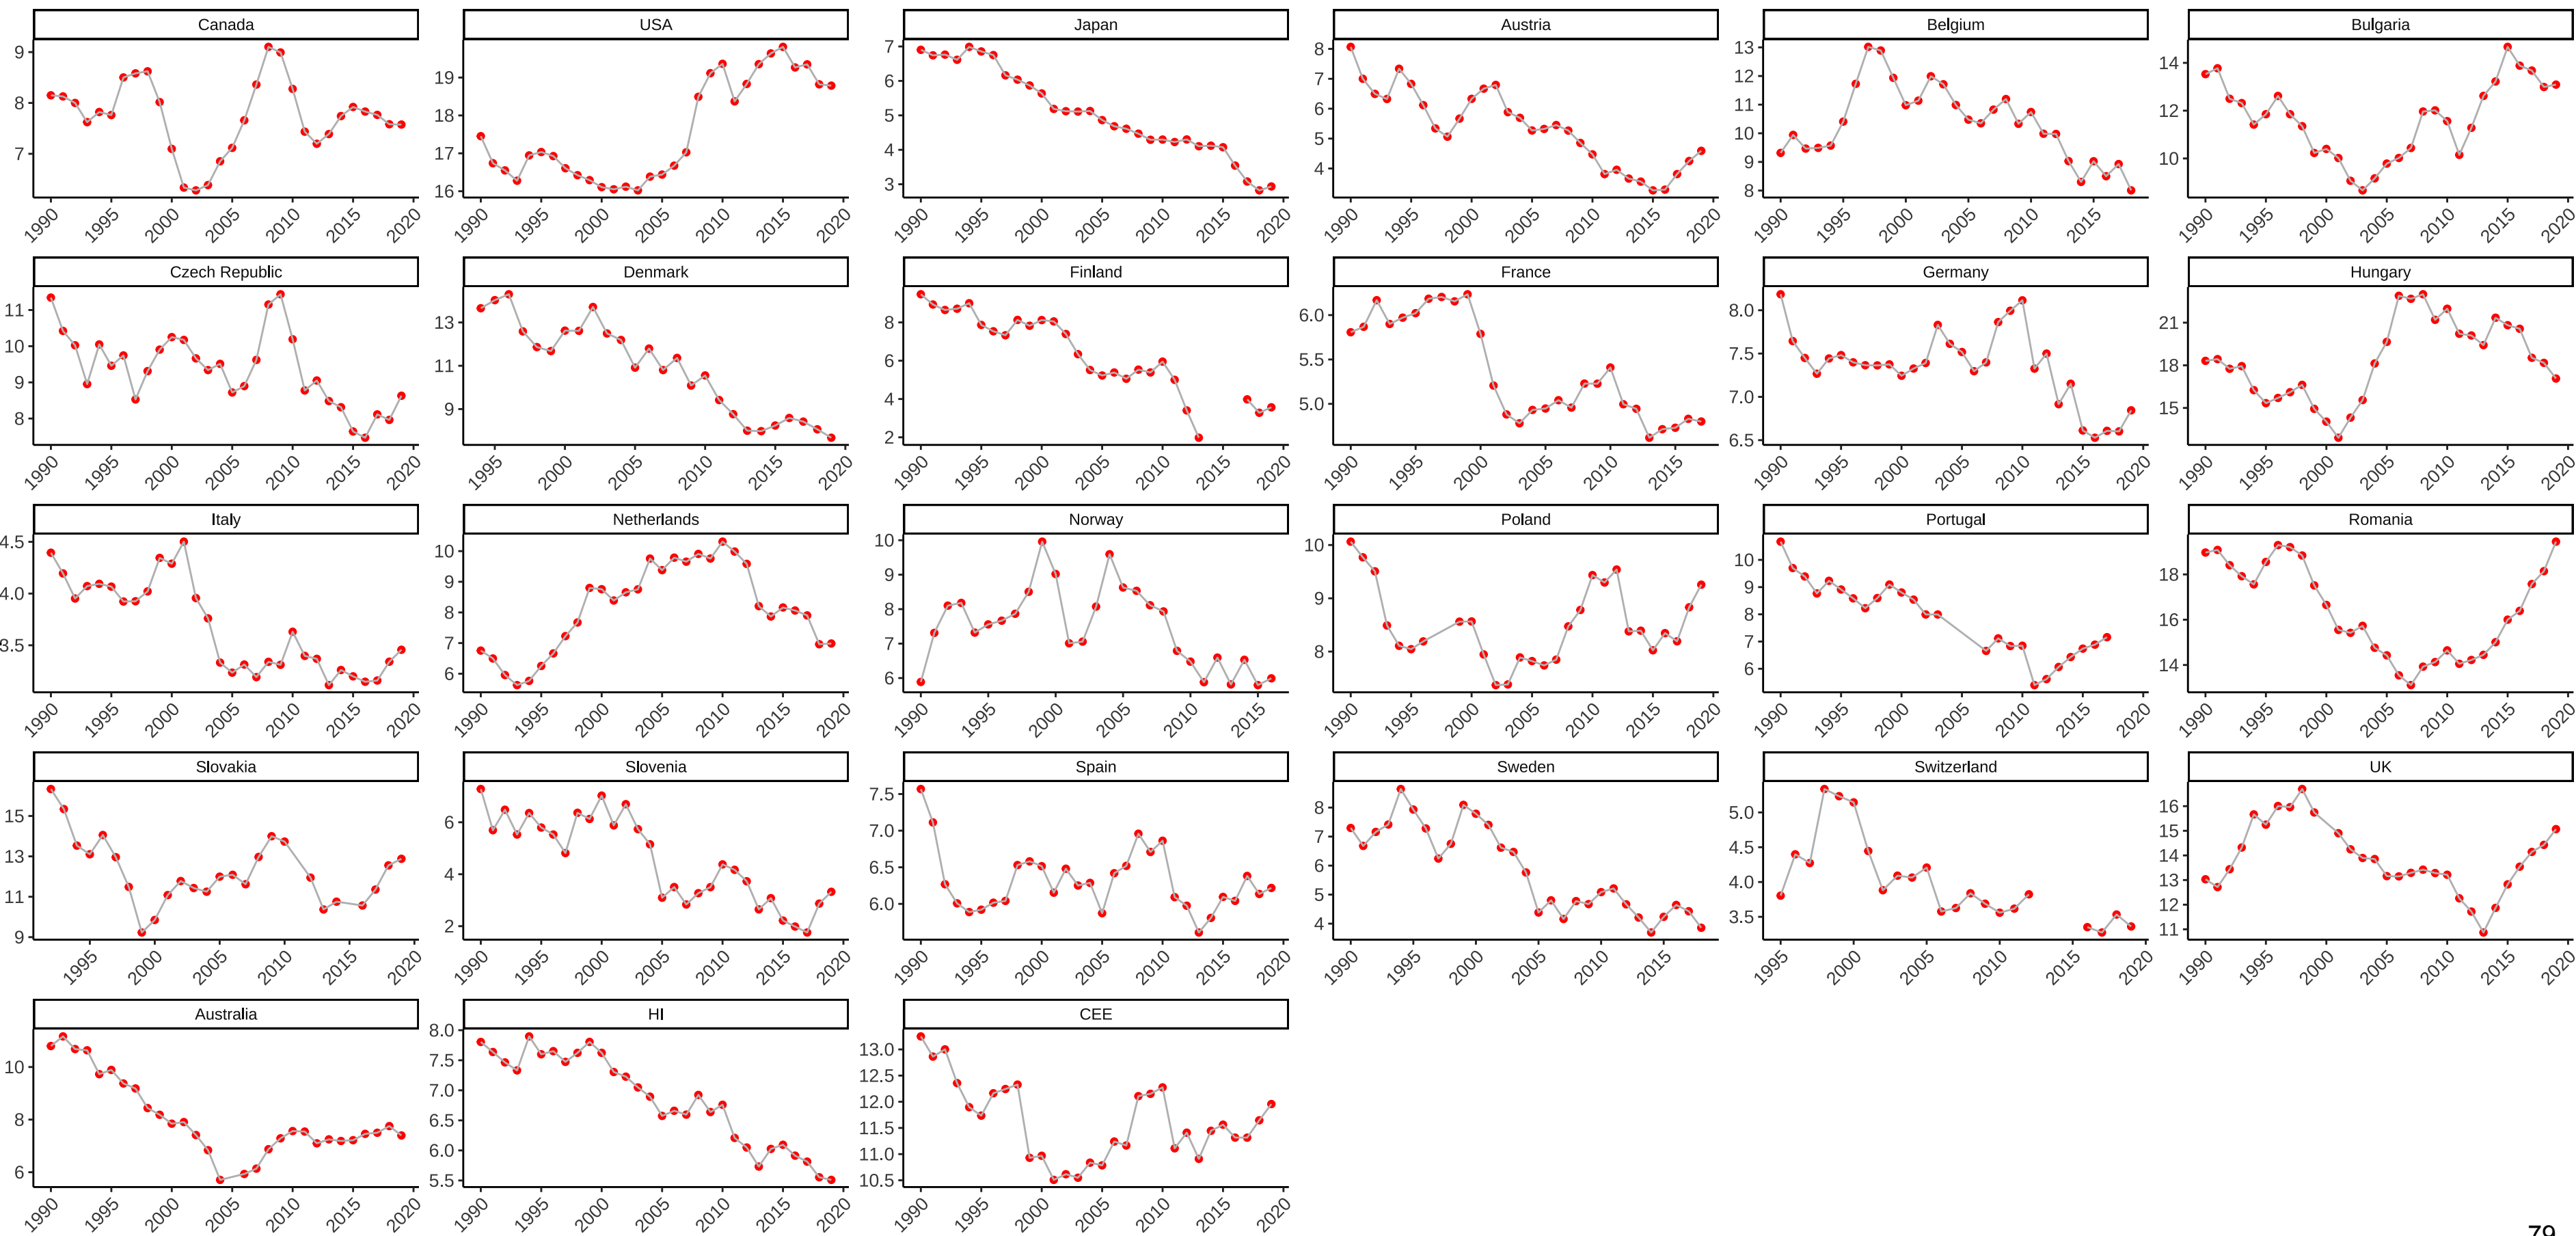

Year

**Figure S73. Three-Year Moving Average of Male Mortality from Trachea/Bronchus, Lung Cancers at Ages 45-54**

Deaths per 100,000

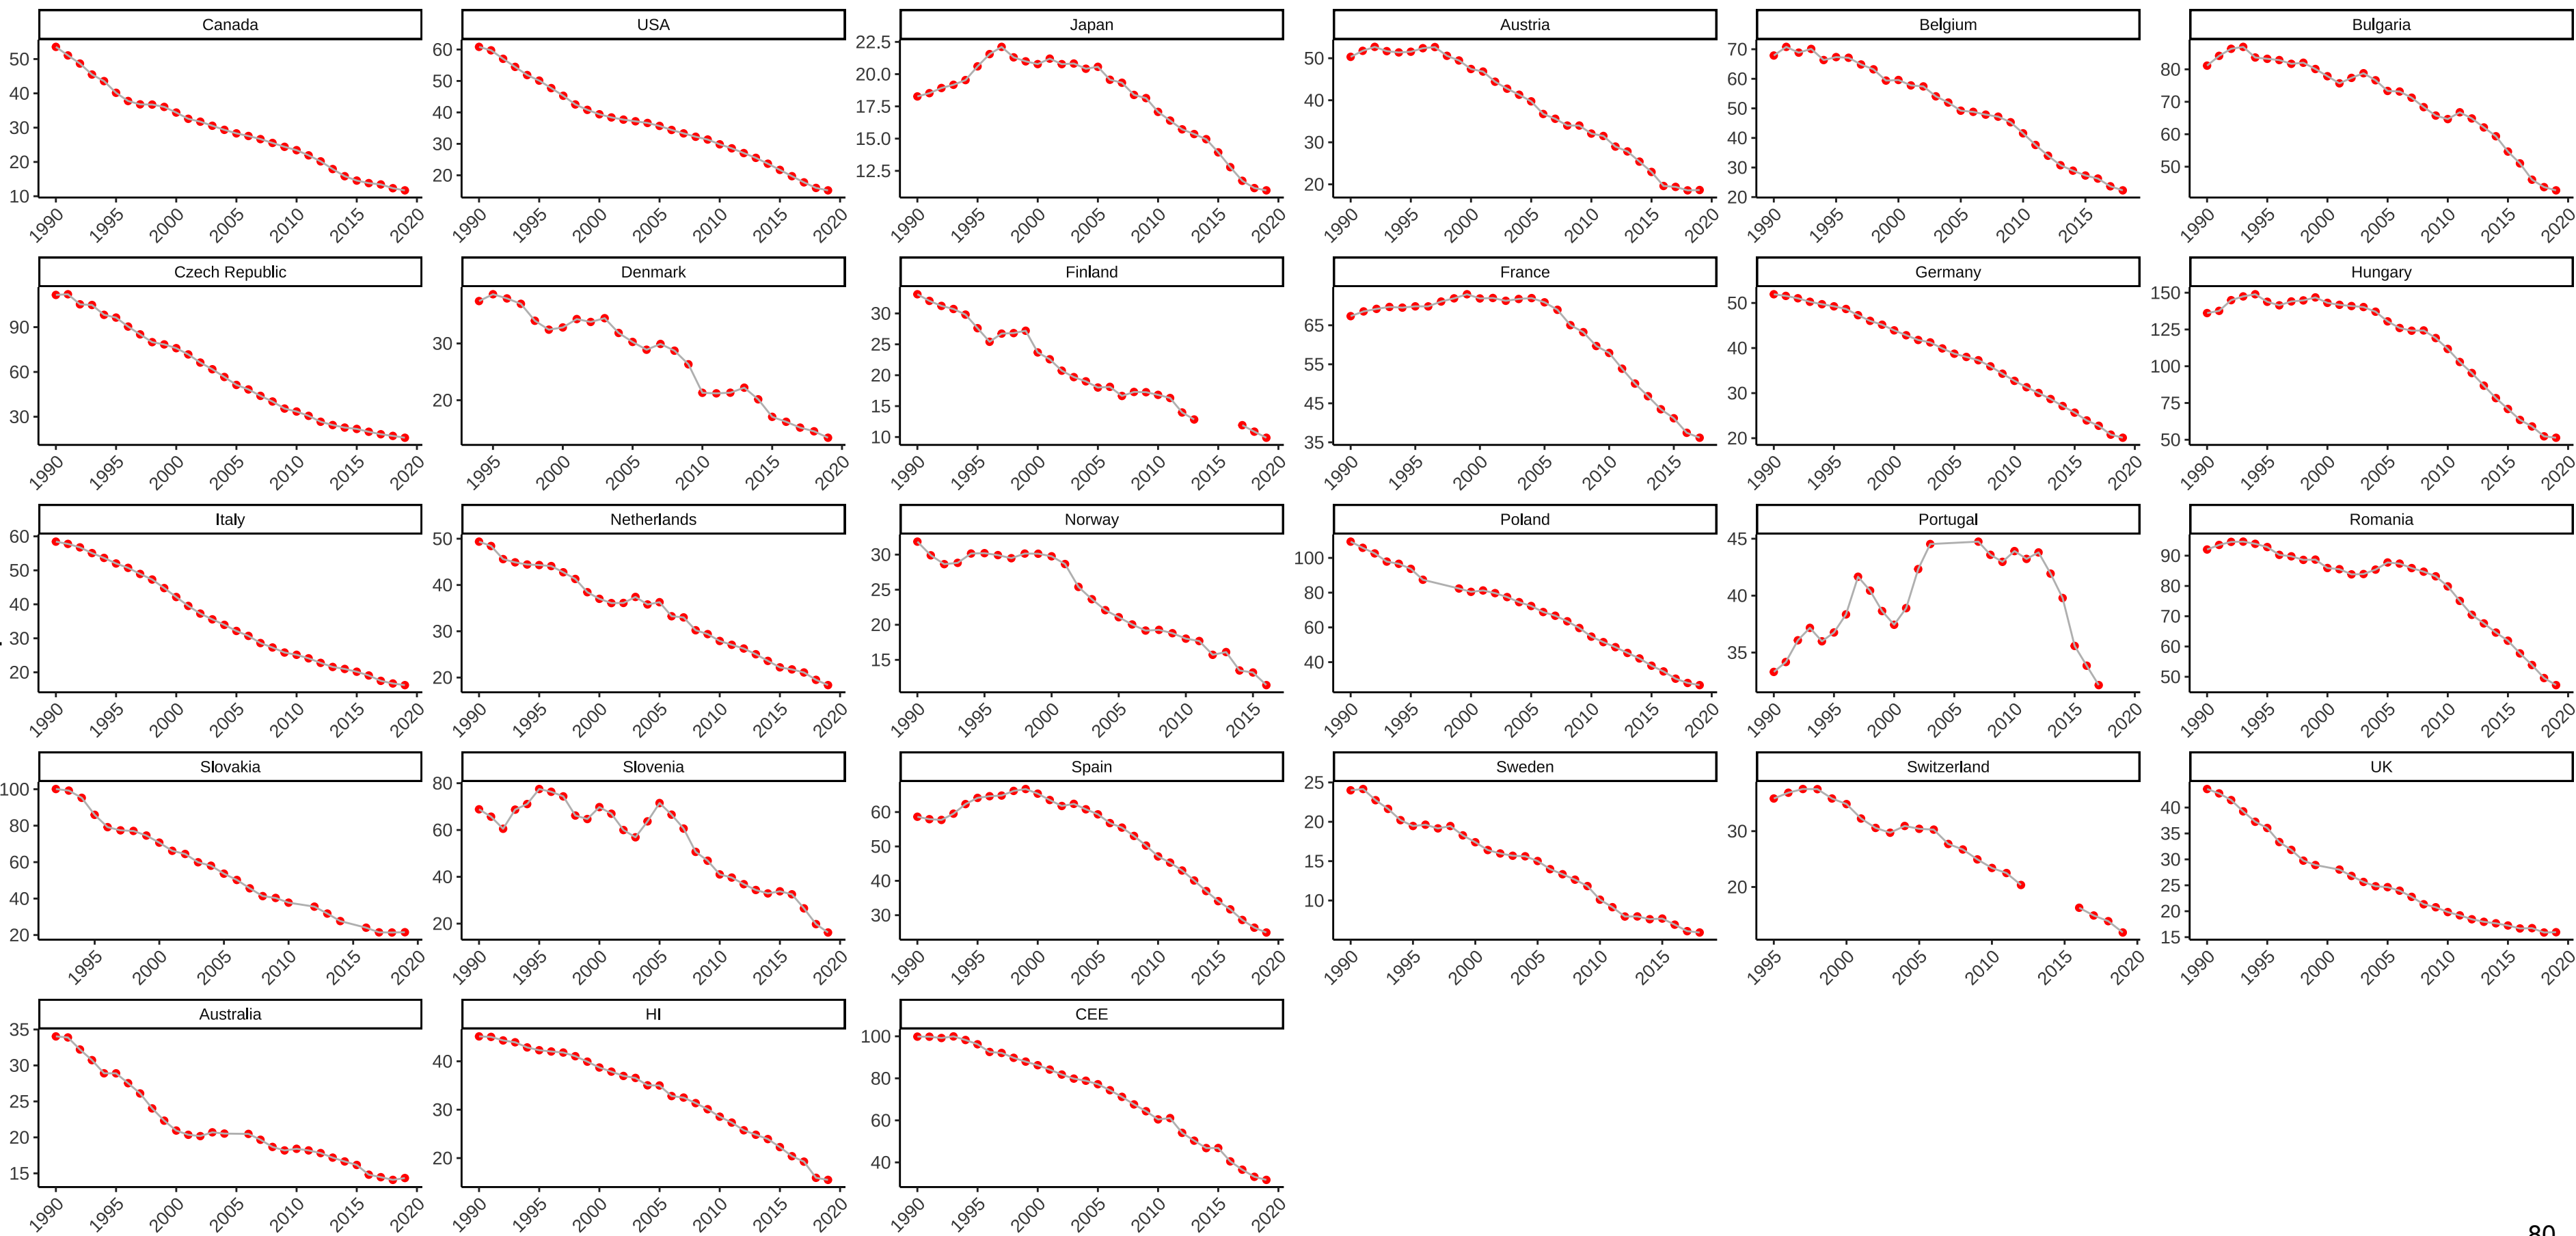

Year

**Figure S74. Three-Year Moving Average of Female Mortality from Trachea/Bronchus, Lung Cancers at Ages 45-54**

Deaths per 100,000

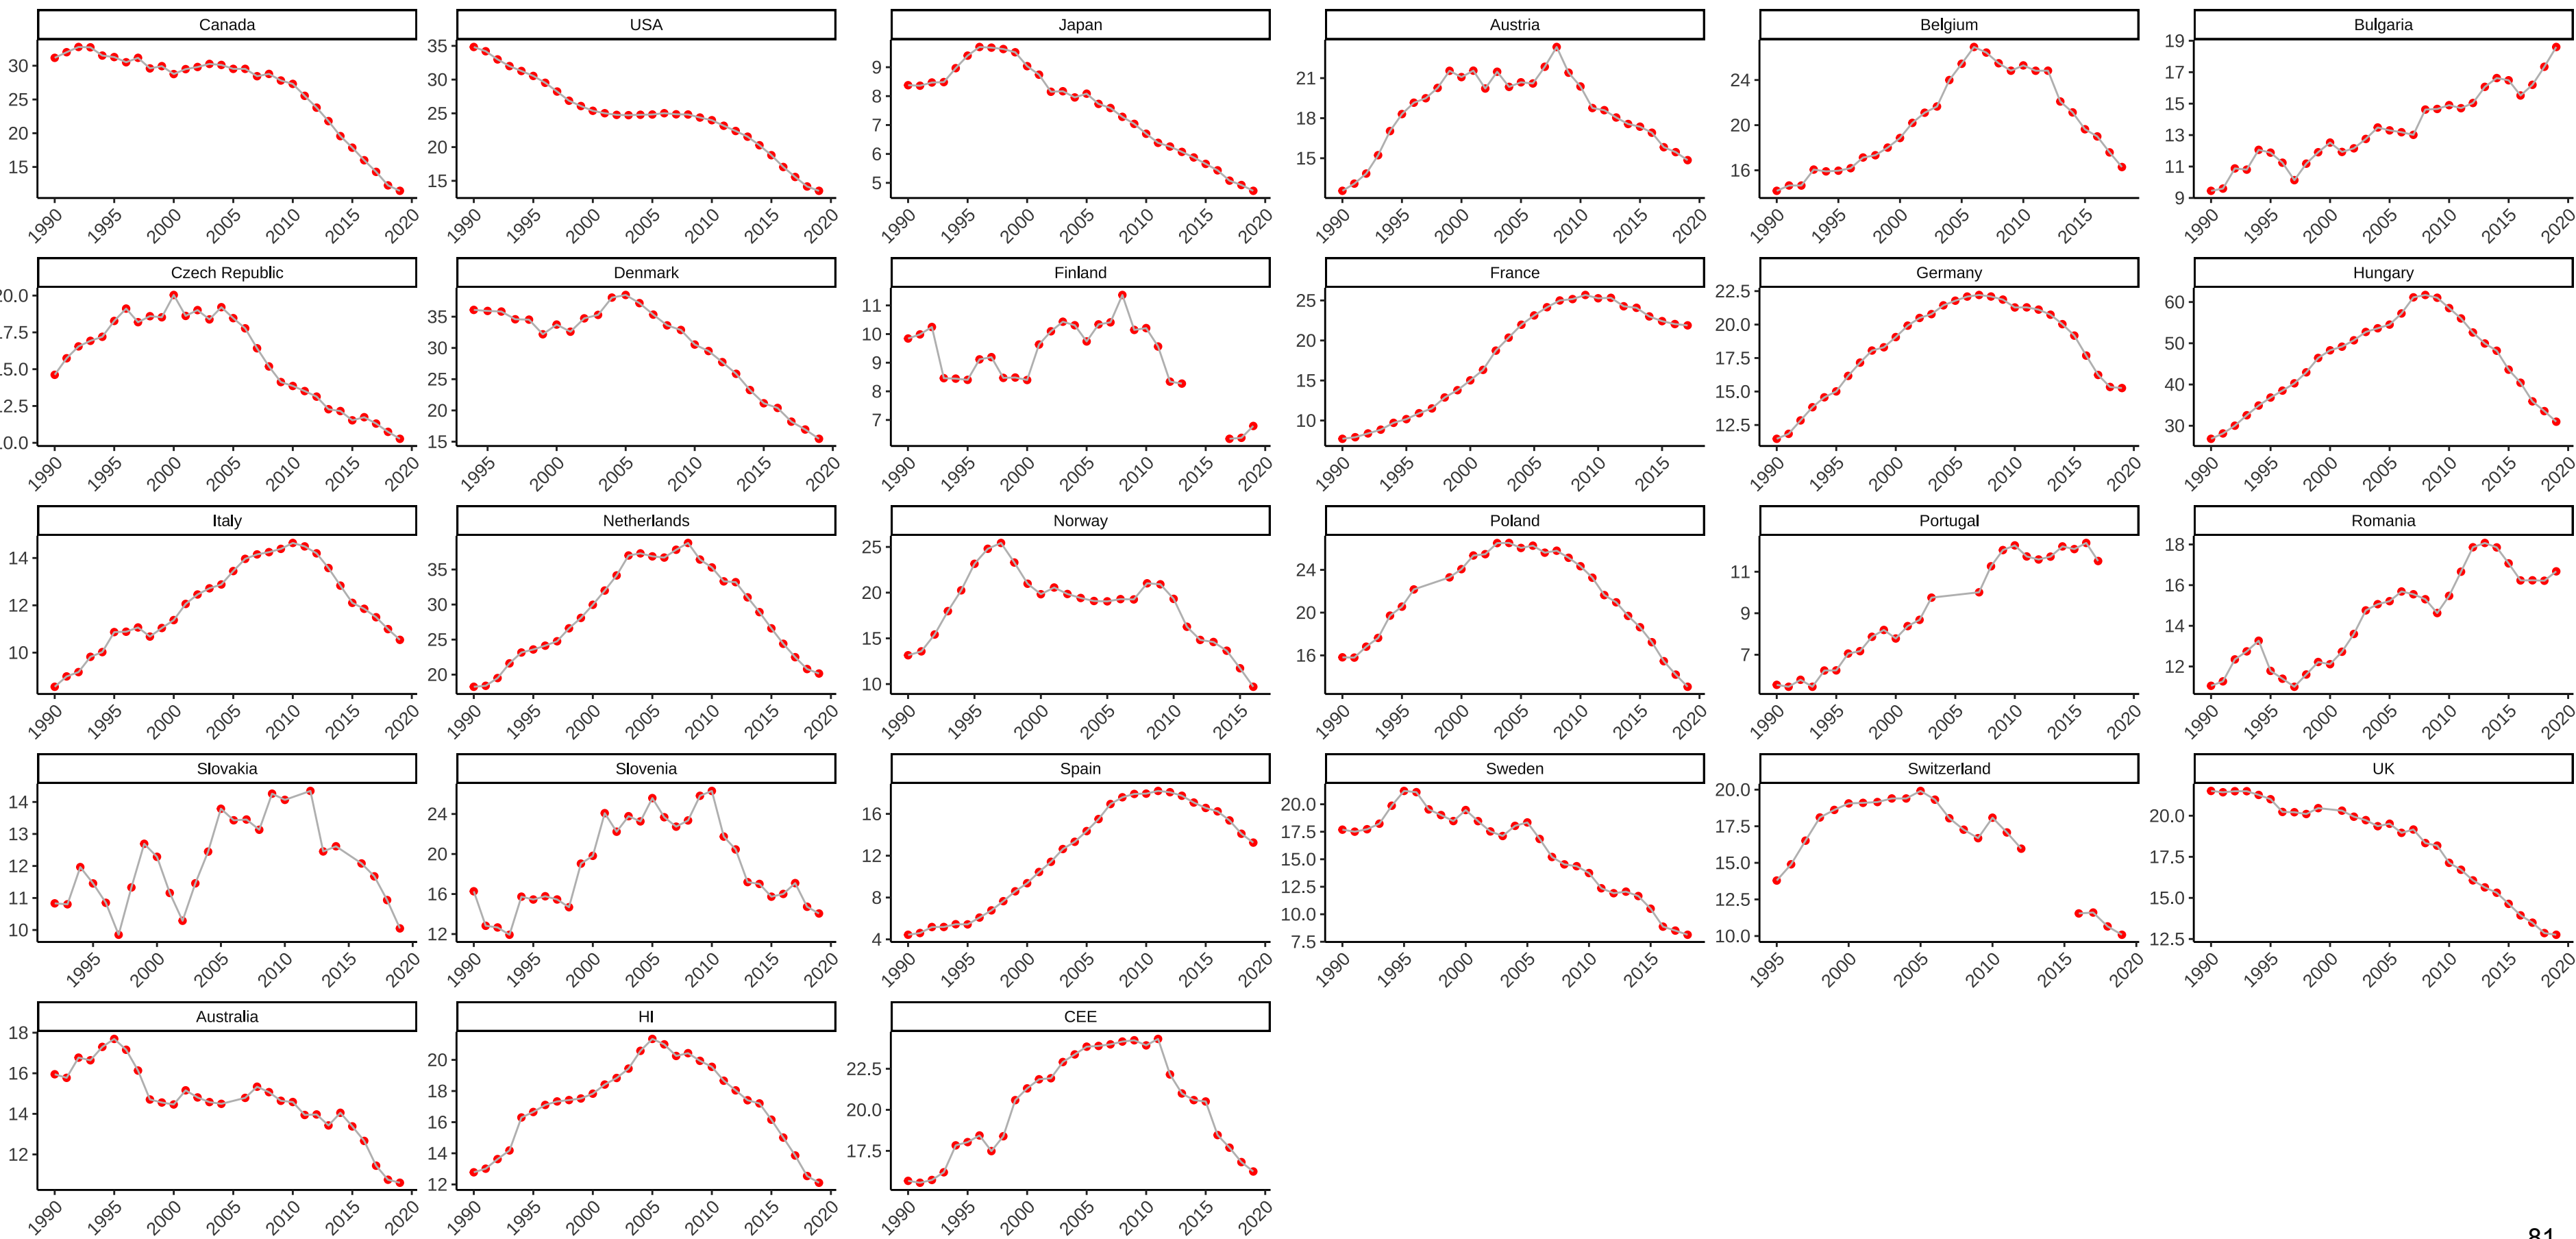

Year

**Figure S75. Three-Year Moving Average of Male Mortality from All Other Cancers at Ages 45-54**

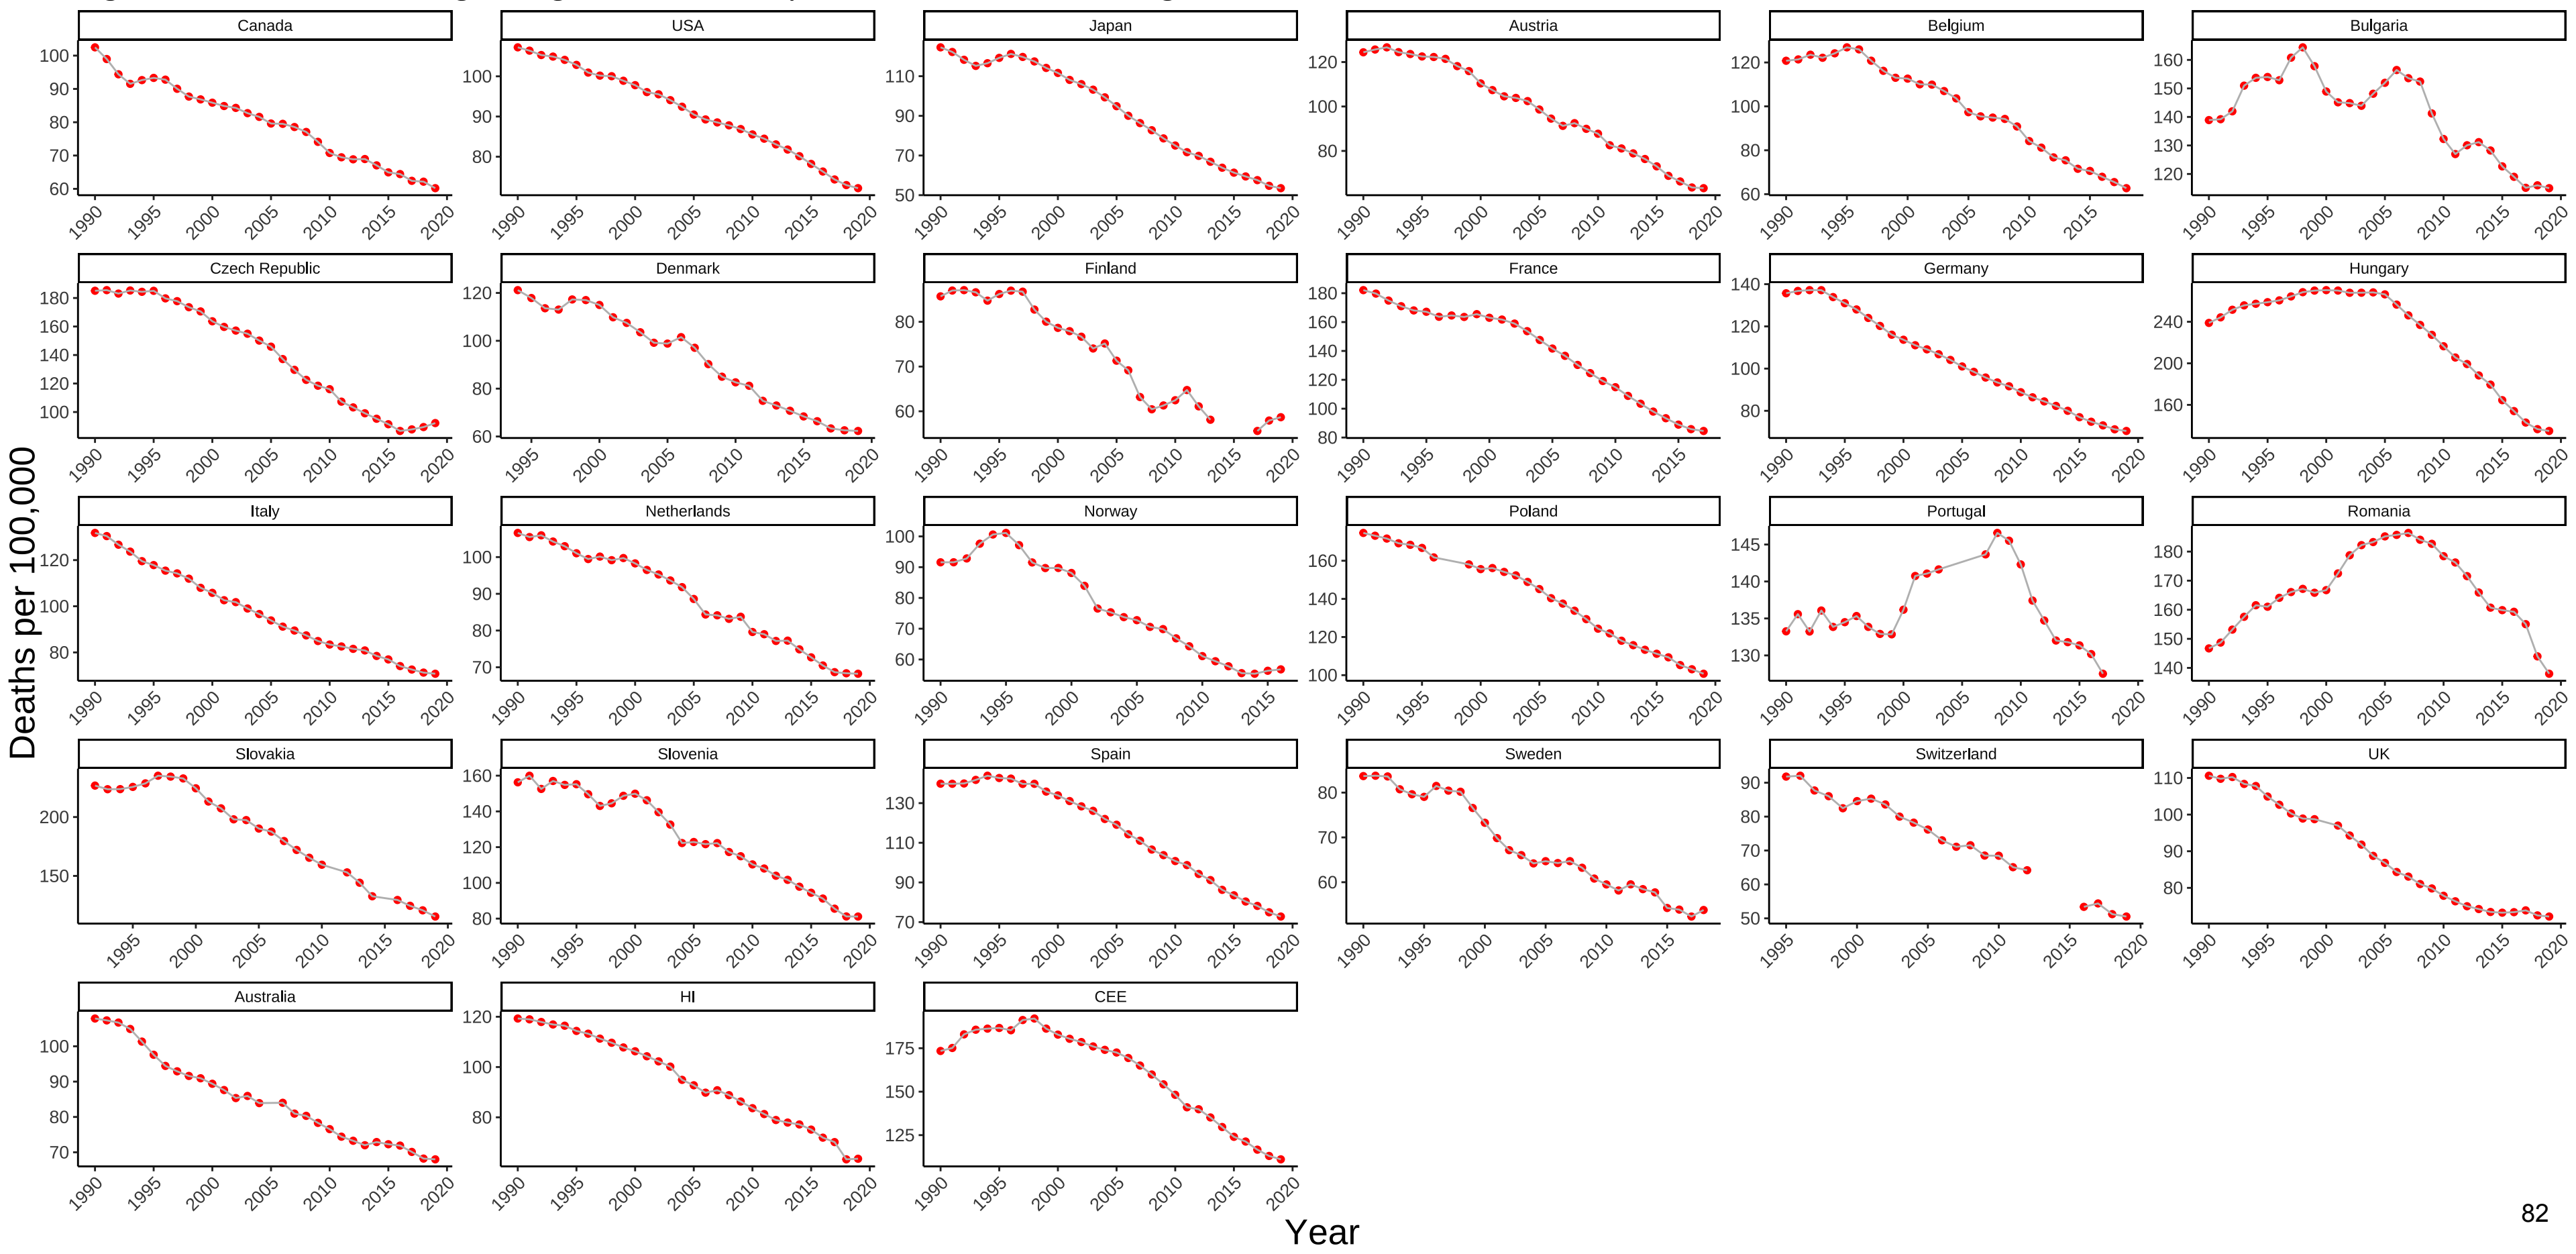

**Figure S76. Three-Year Moving Average of Female Mortality from All Other Cancers at Ages 45-54**

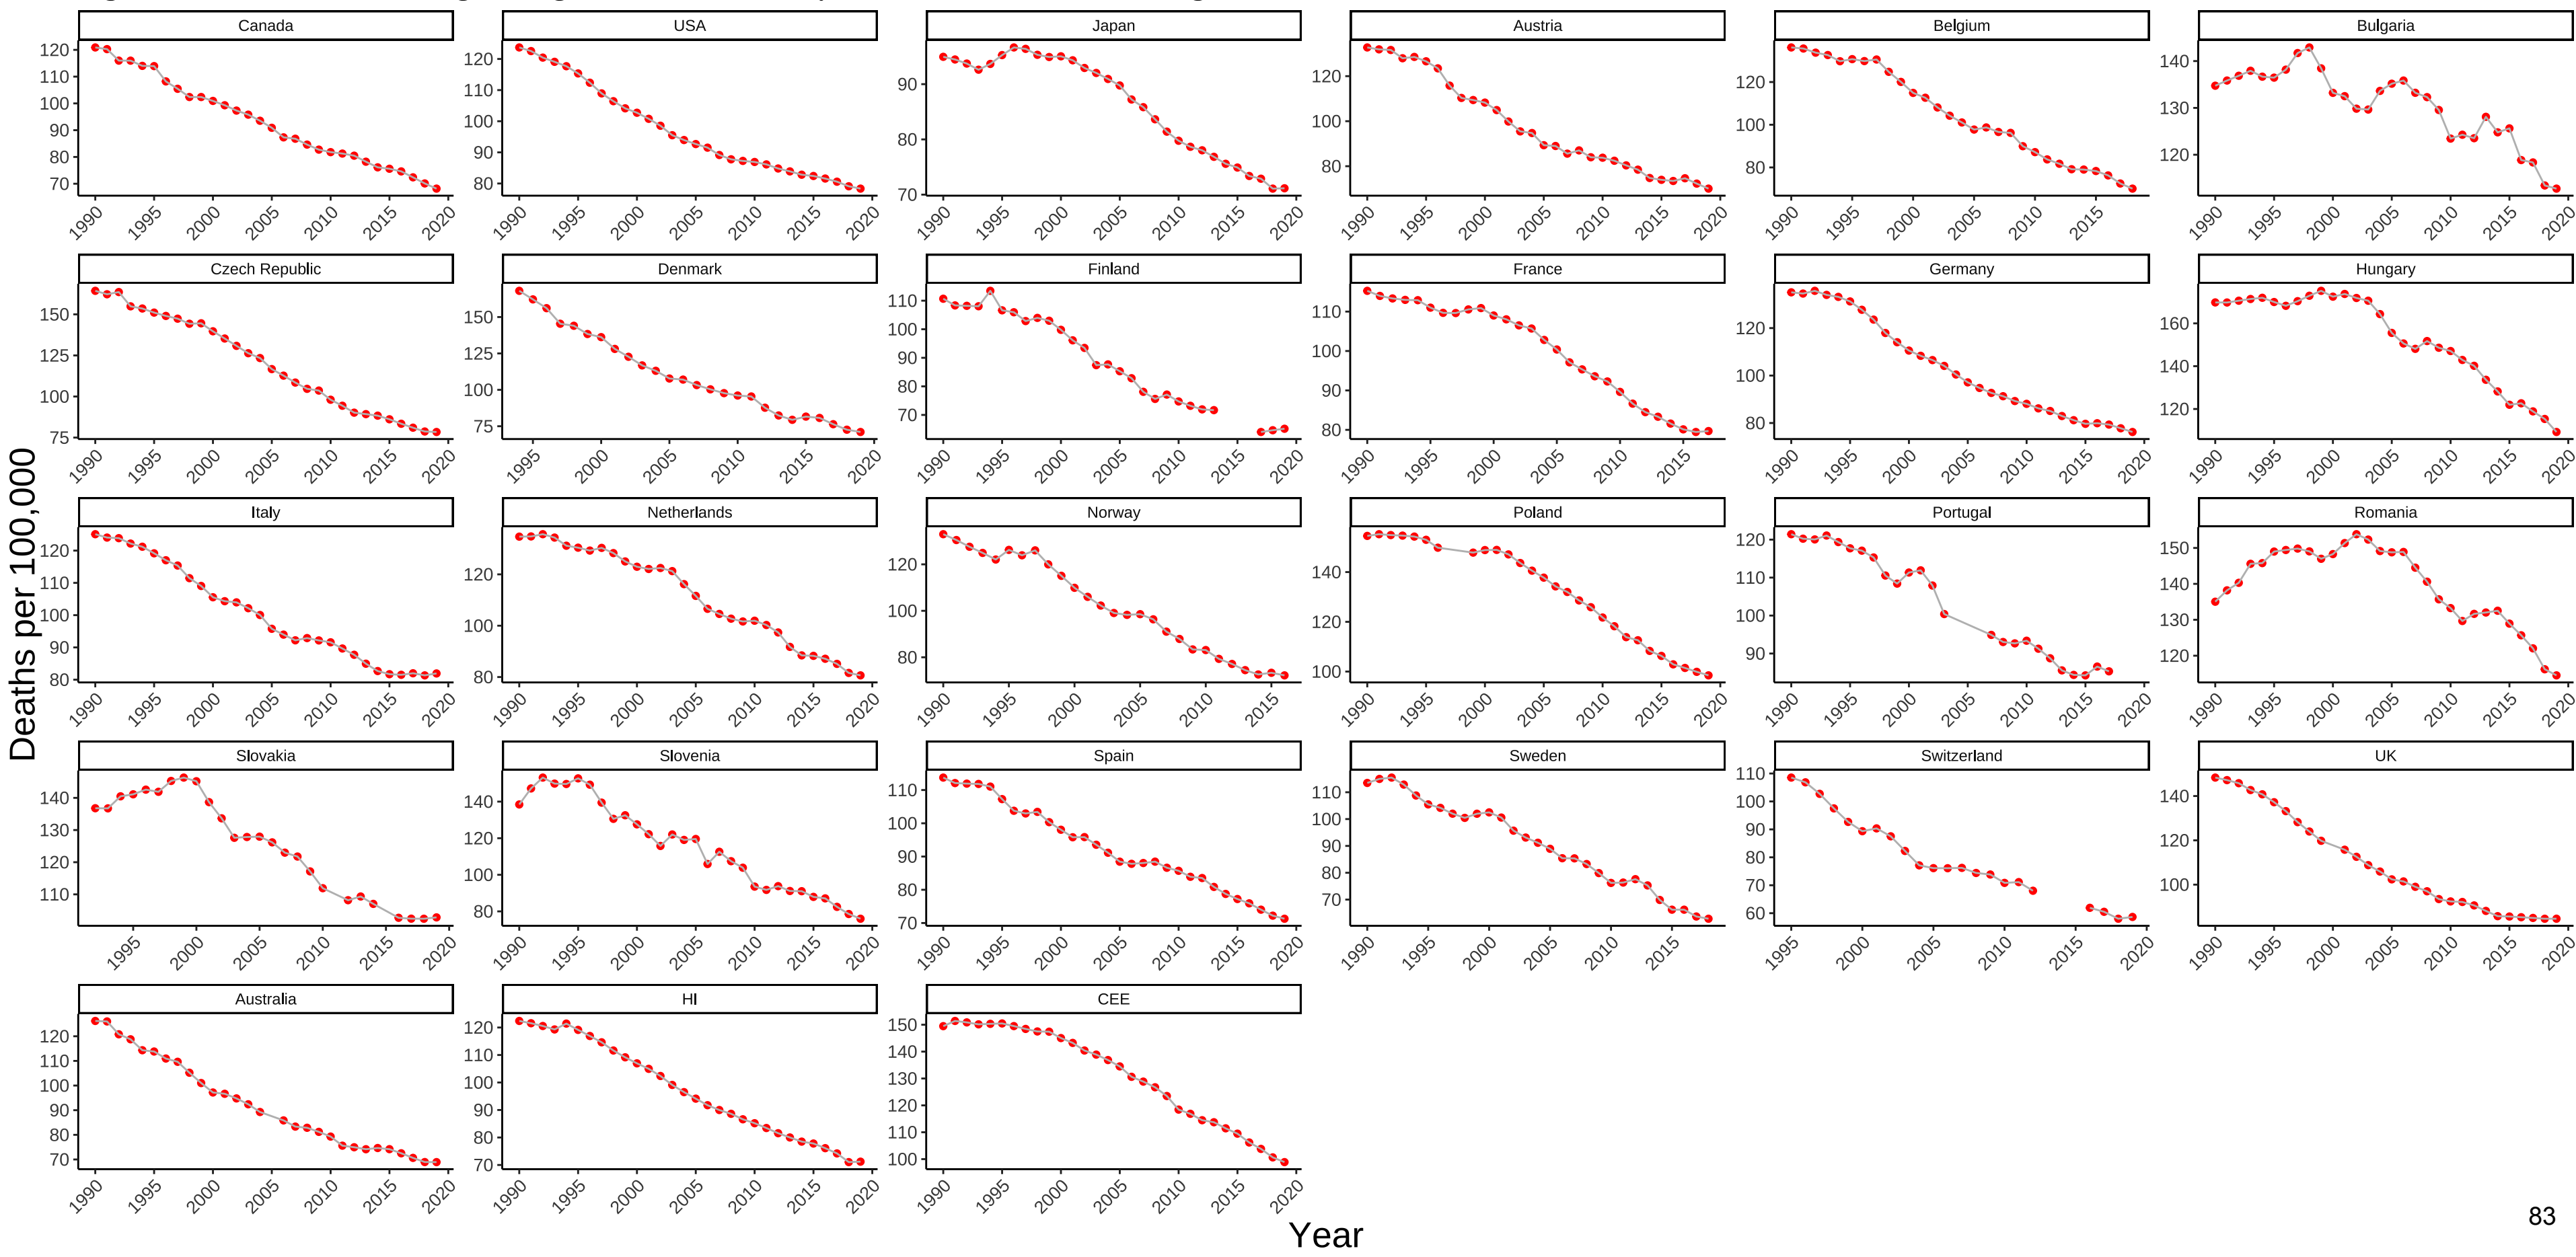

**Figure S77. Three-Year Moving Average of Male Mortality from Nervous System Diseases at Ages 45-54**

Deaths per 100,000

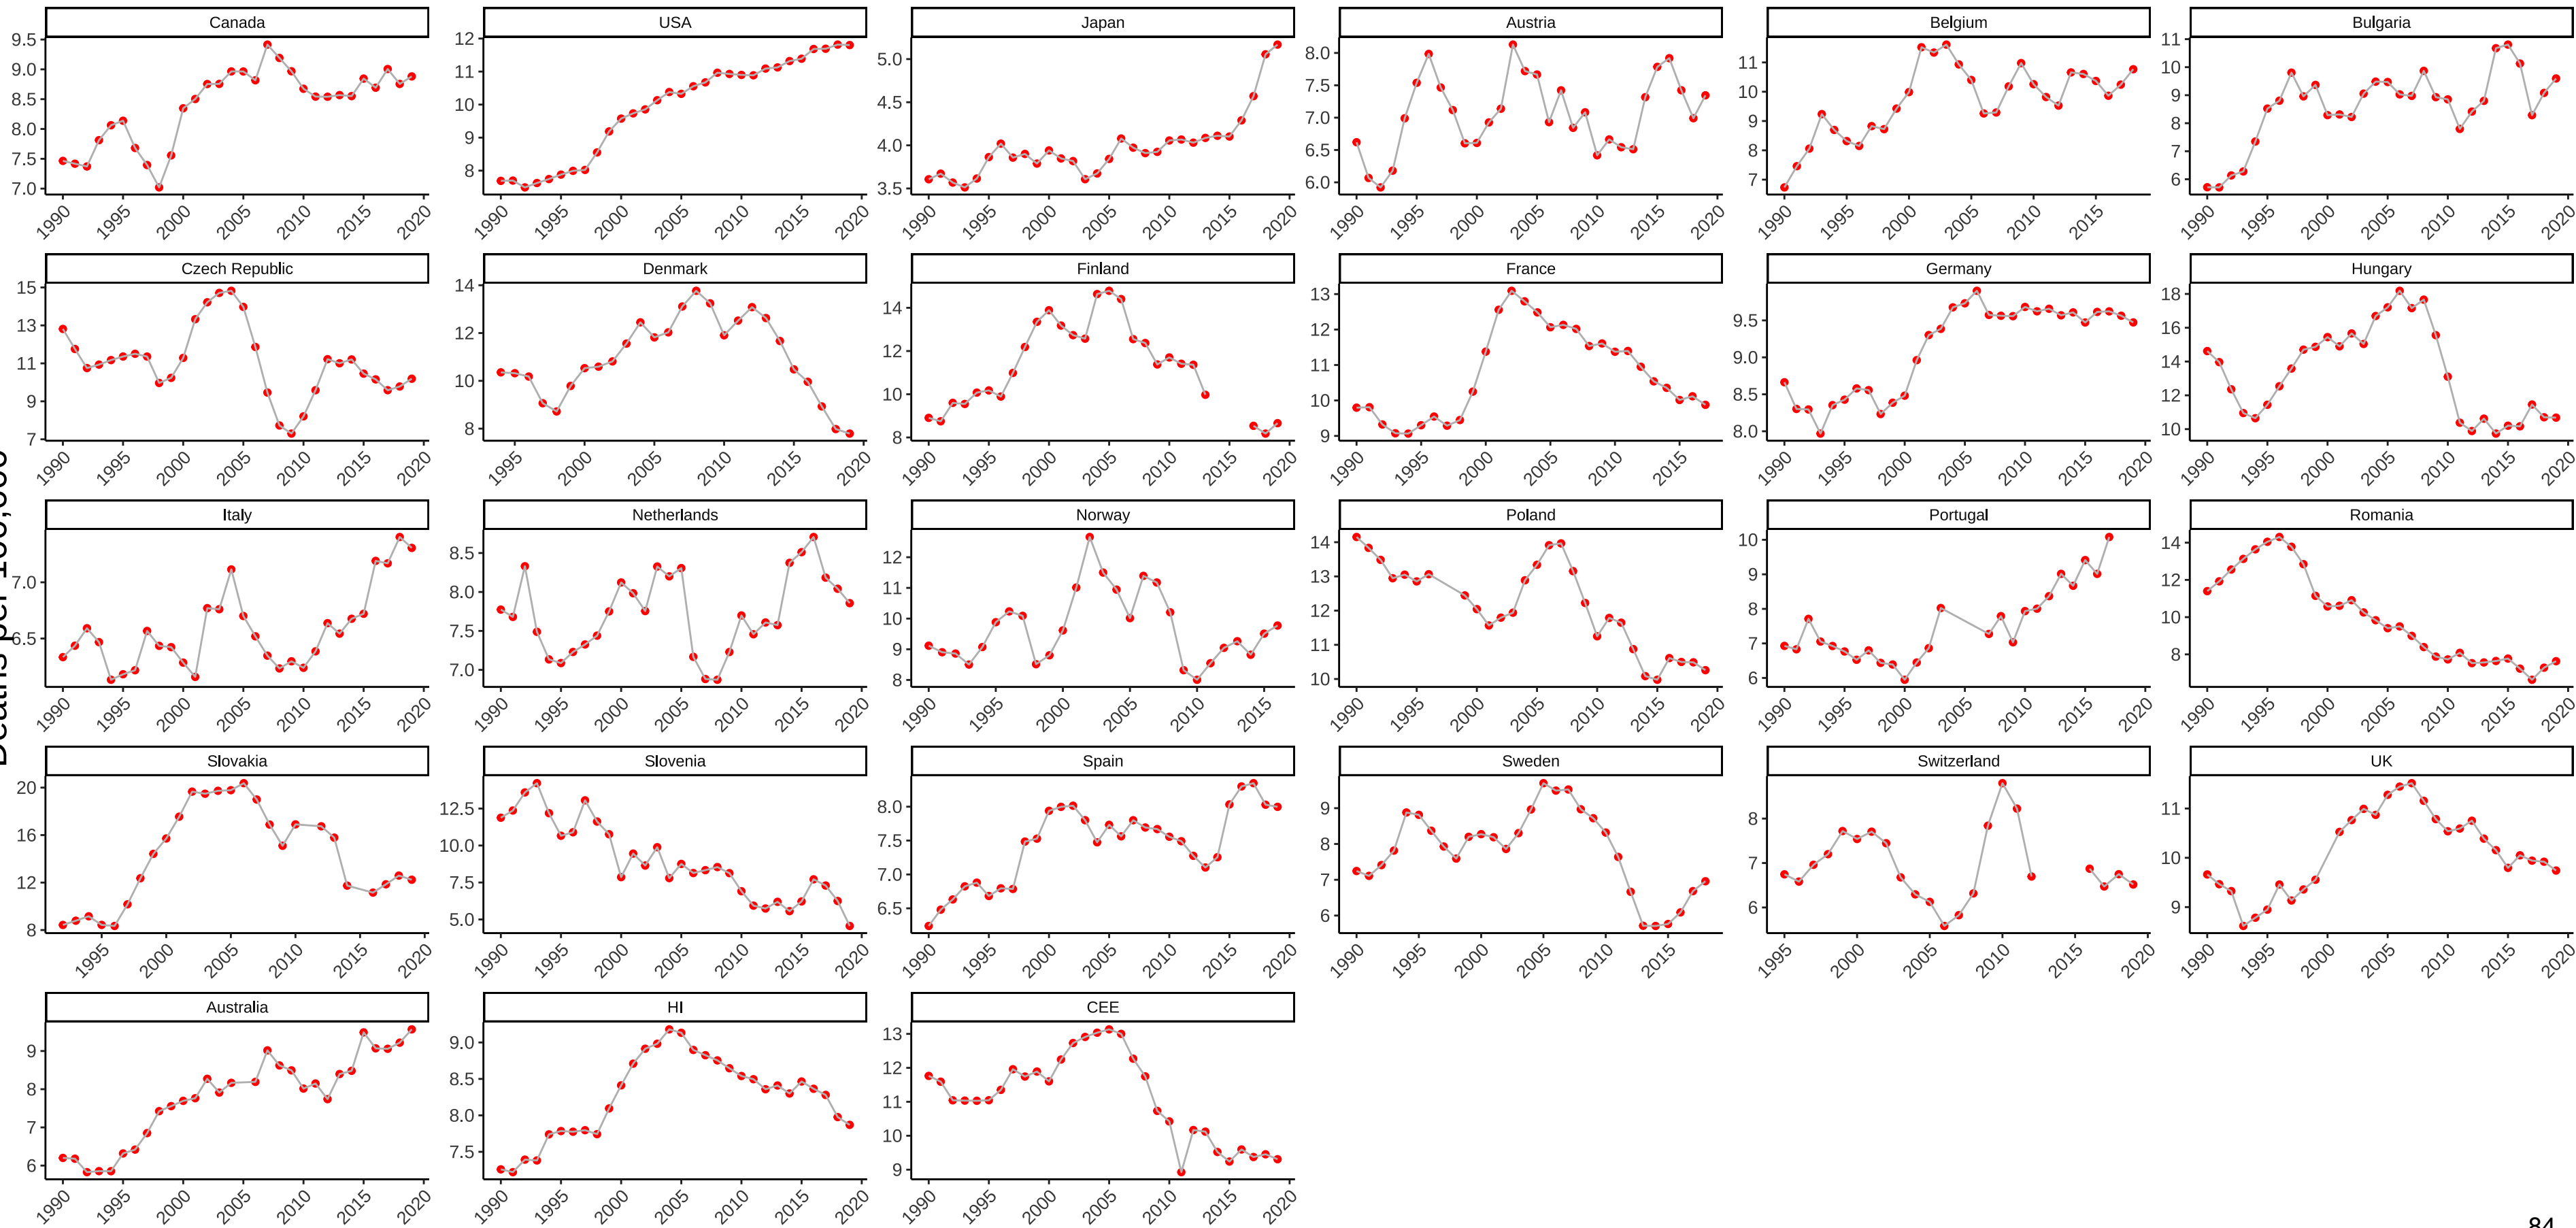

Year

**Figure S78. Three-Year Moving Average of Female Mortality from Nervous System Diseases at Ages 45-54**

Deaths per 100,000

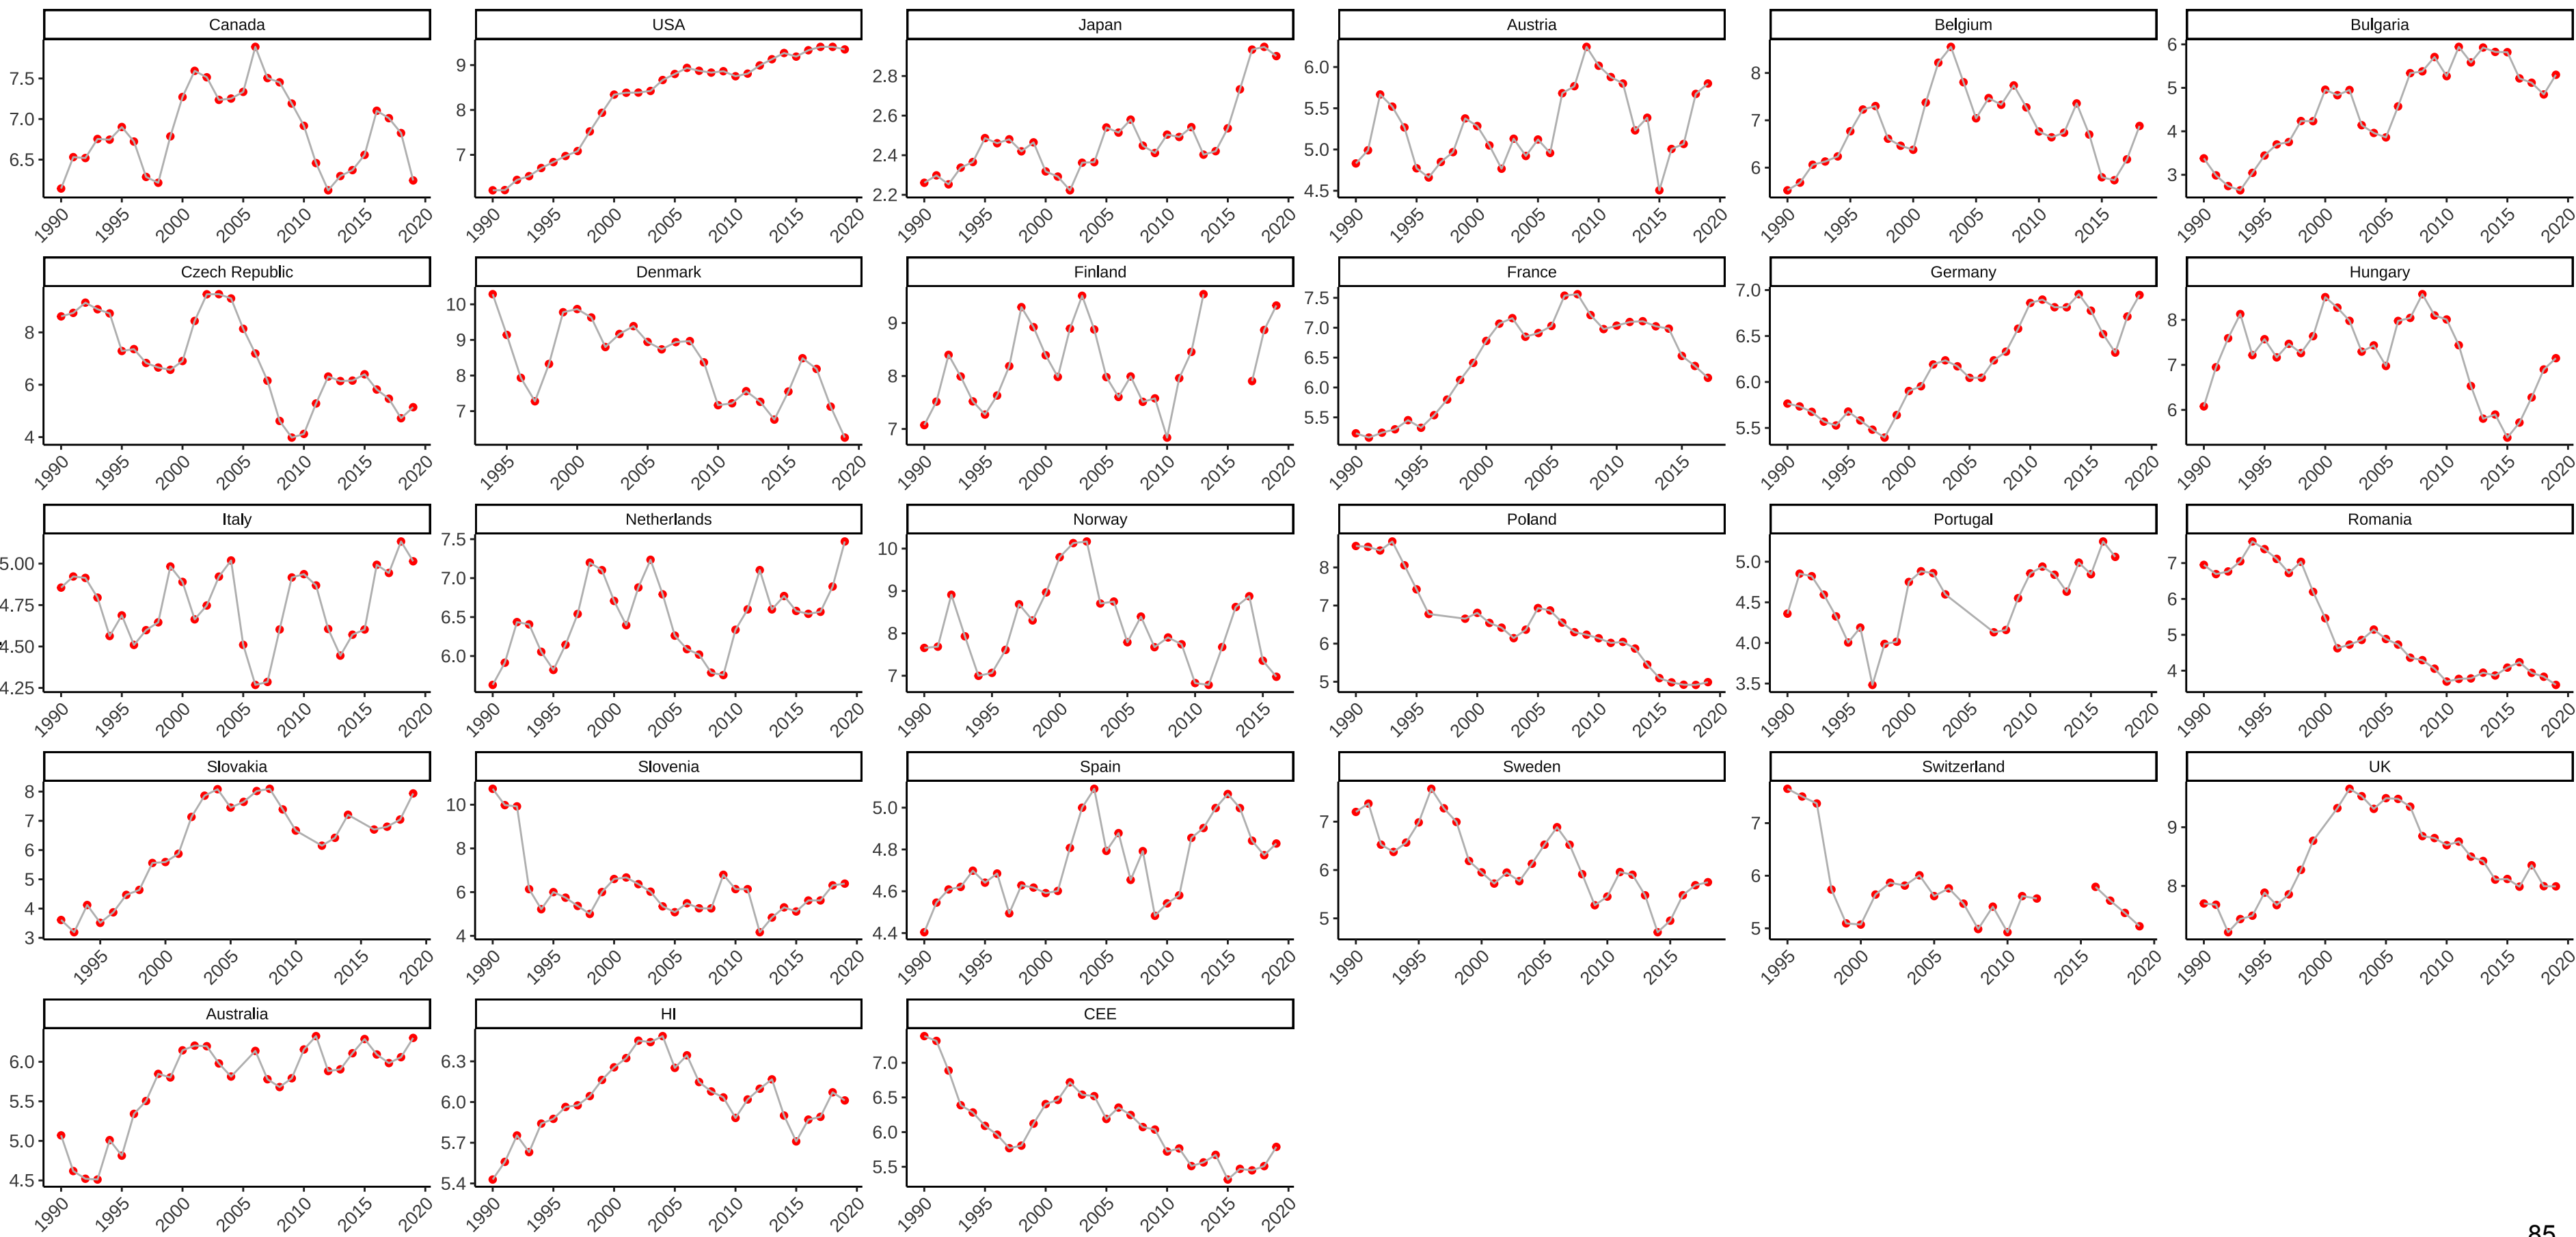

Year

**Figure S79. Three-Year Moving Average of Male Mortality from Metabolic Diseases at Ages 45-54**

Deaths per 100,000

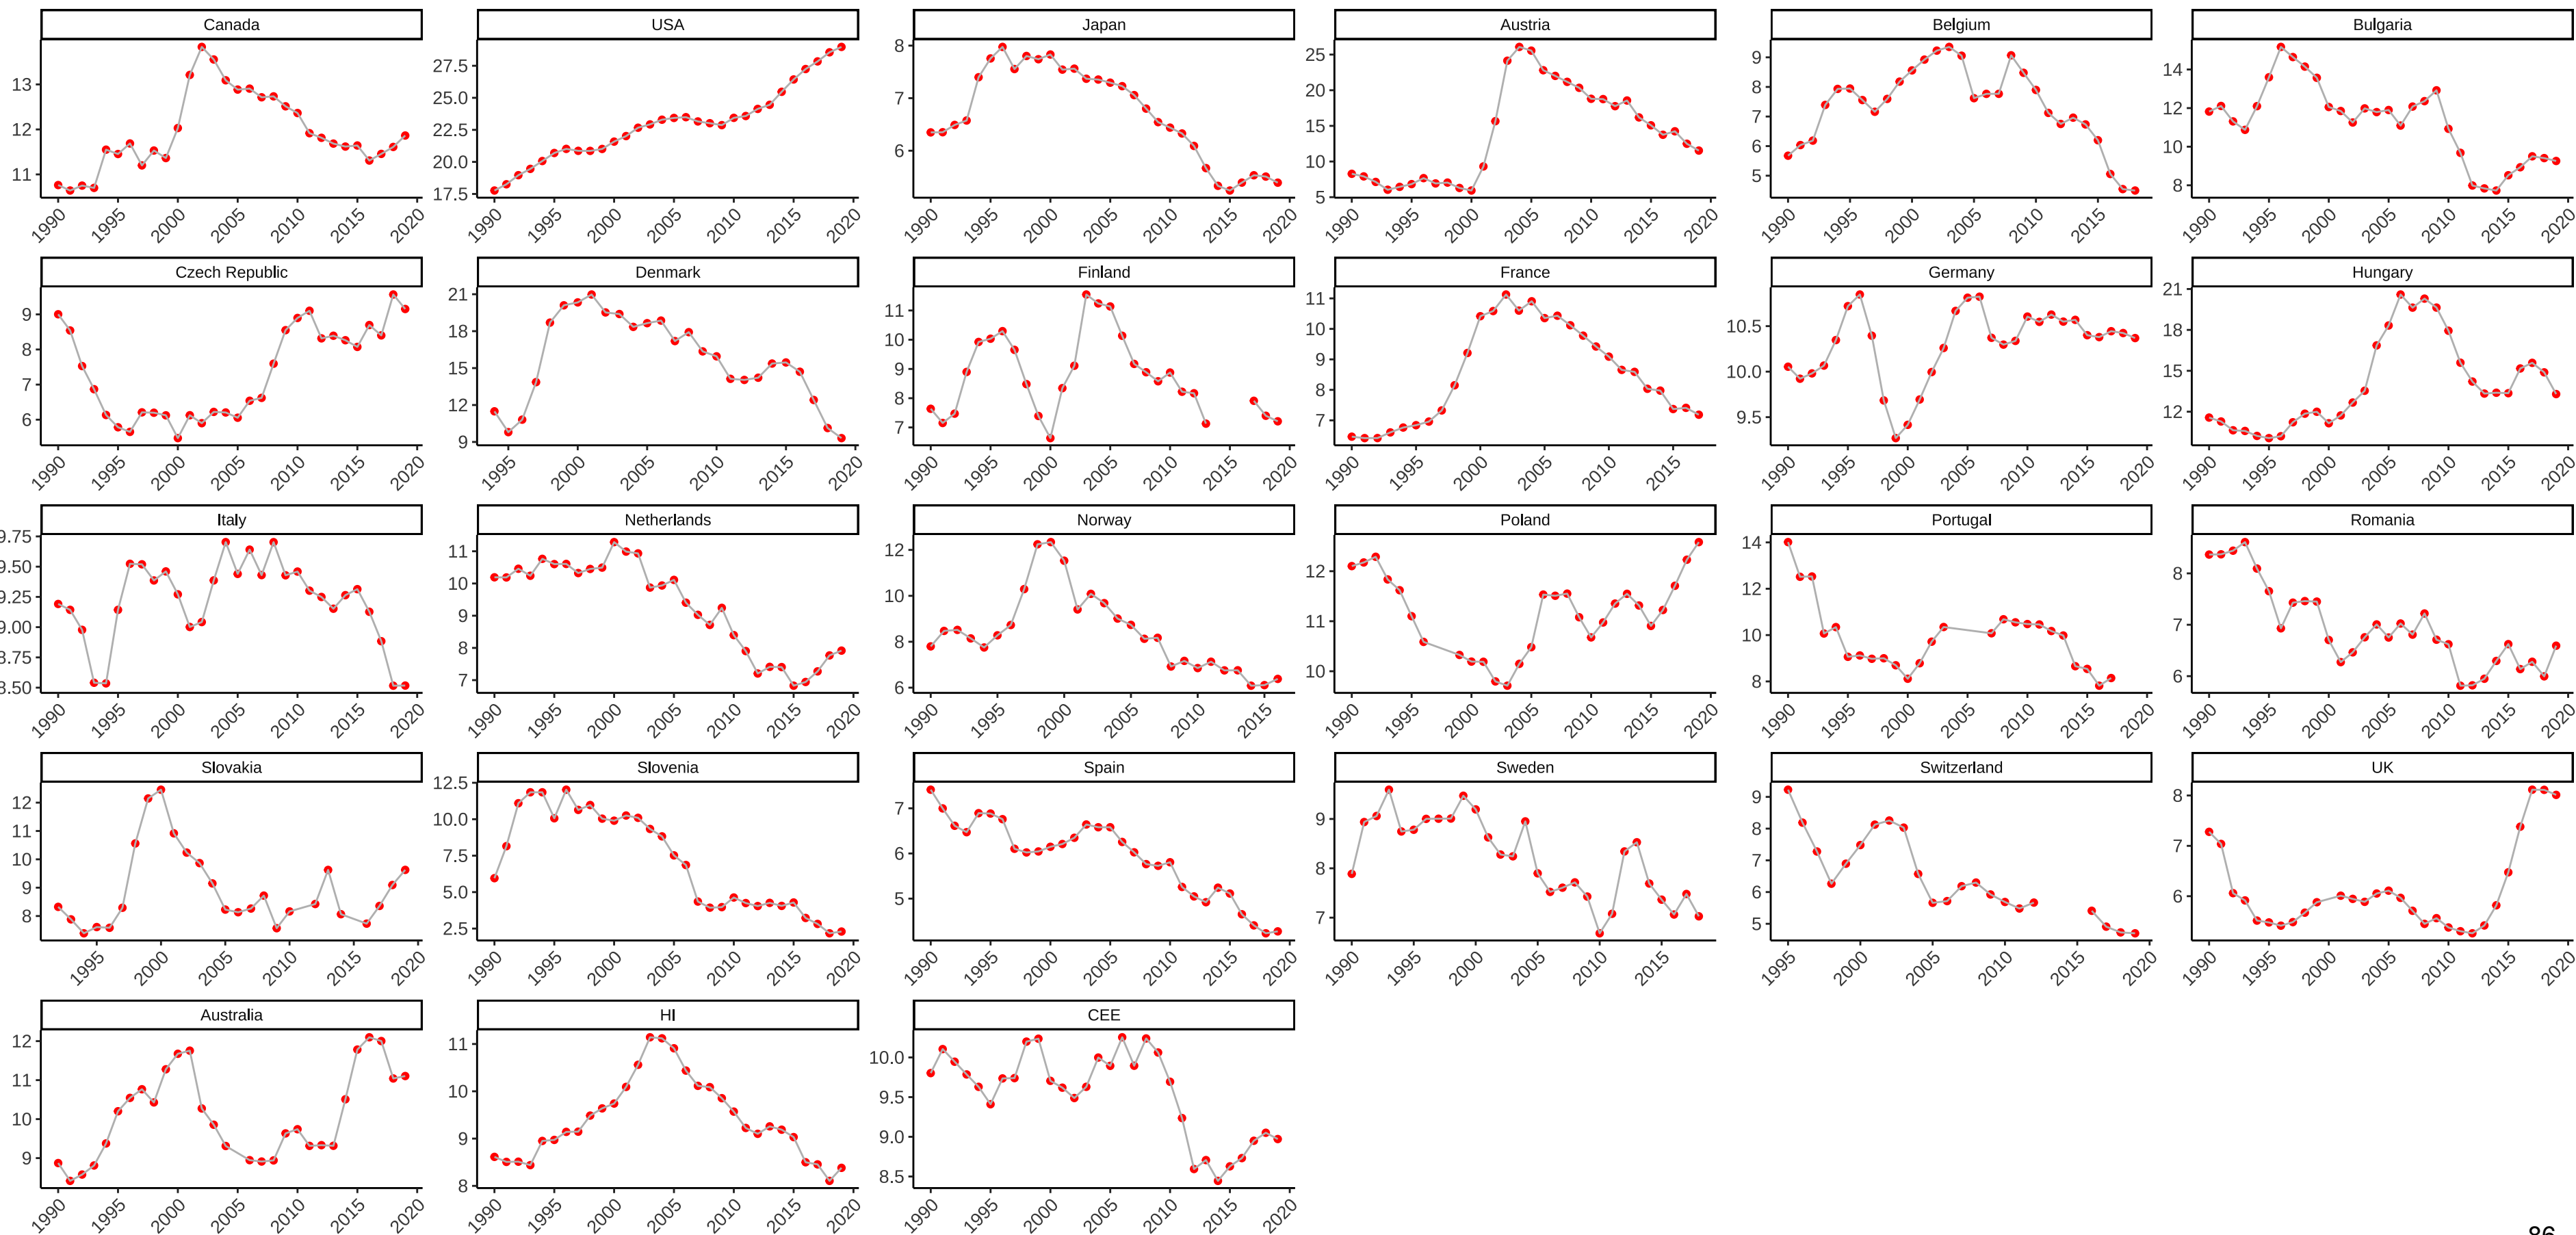

Year

**Figure S80. Three-Year Moving Average of Female Mortality from Metabolic Diseases at Ages 45-54**

Deaths per 100,000

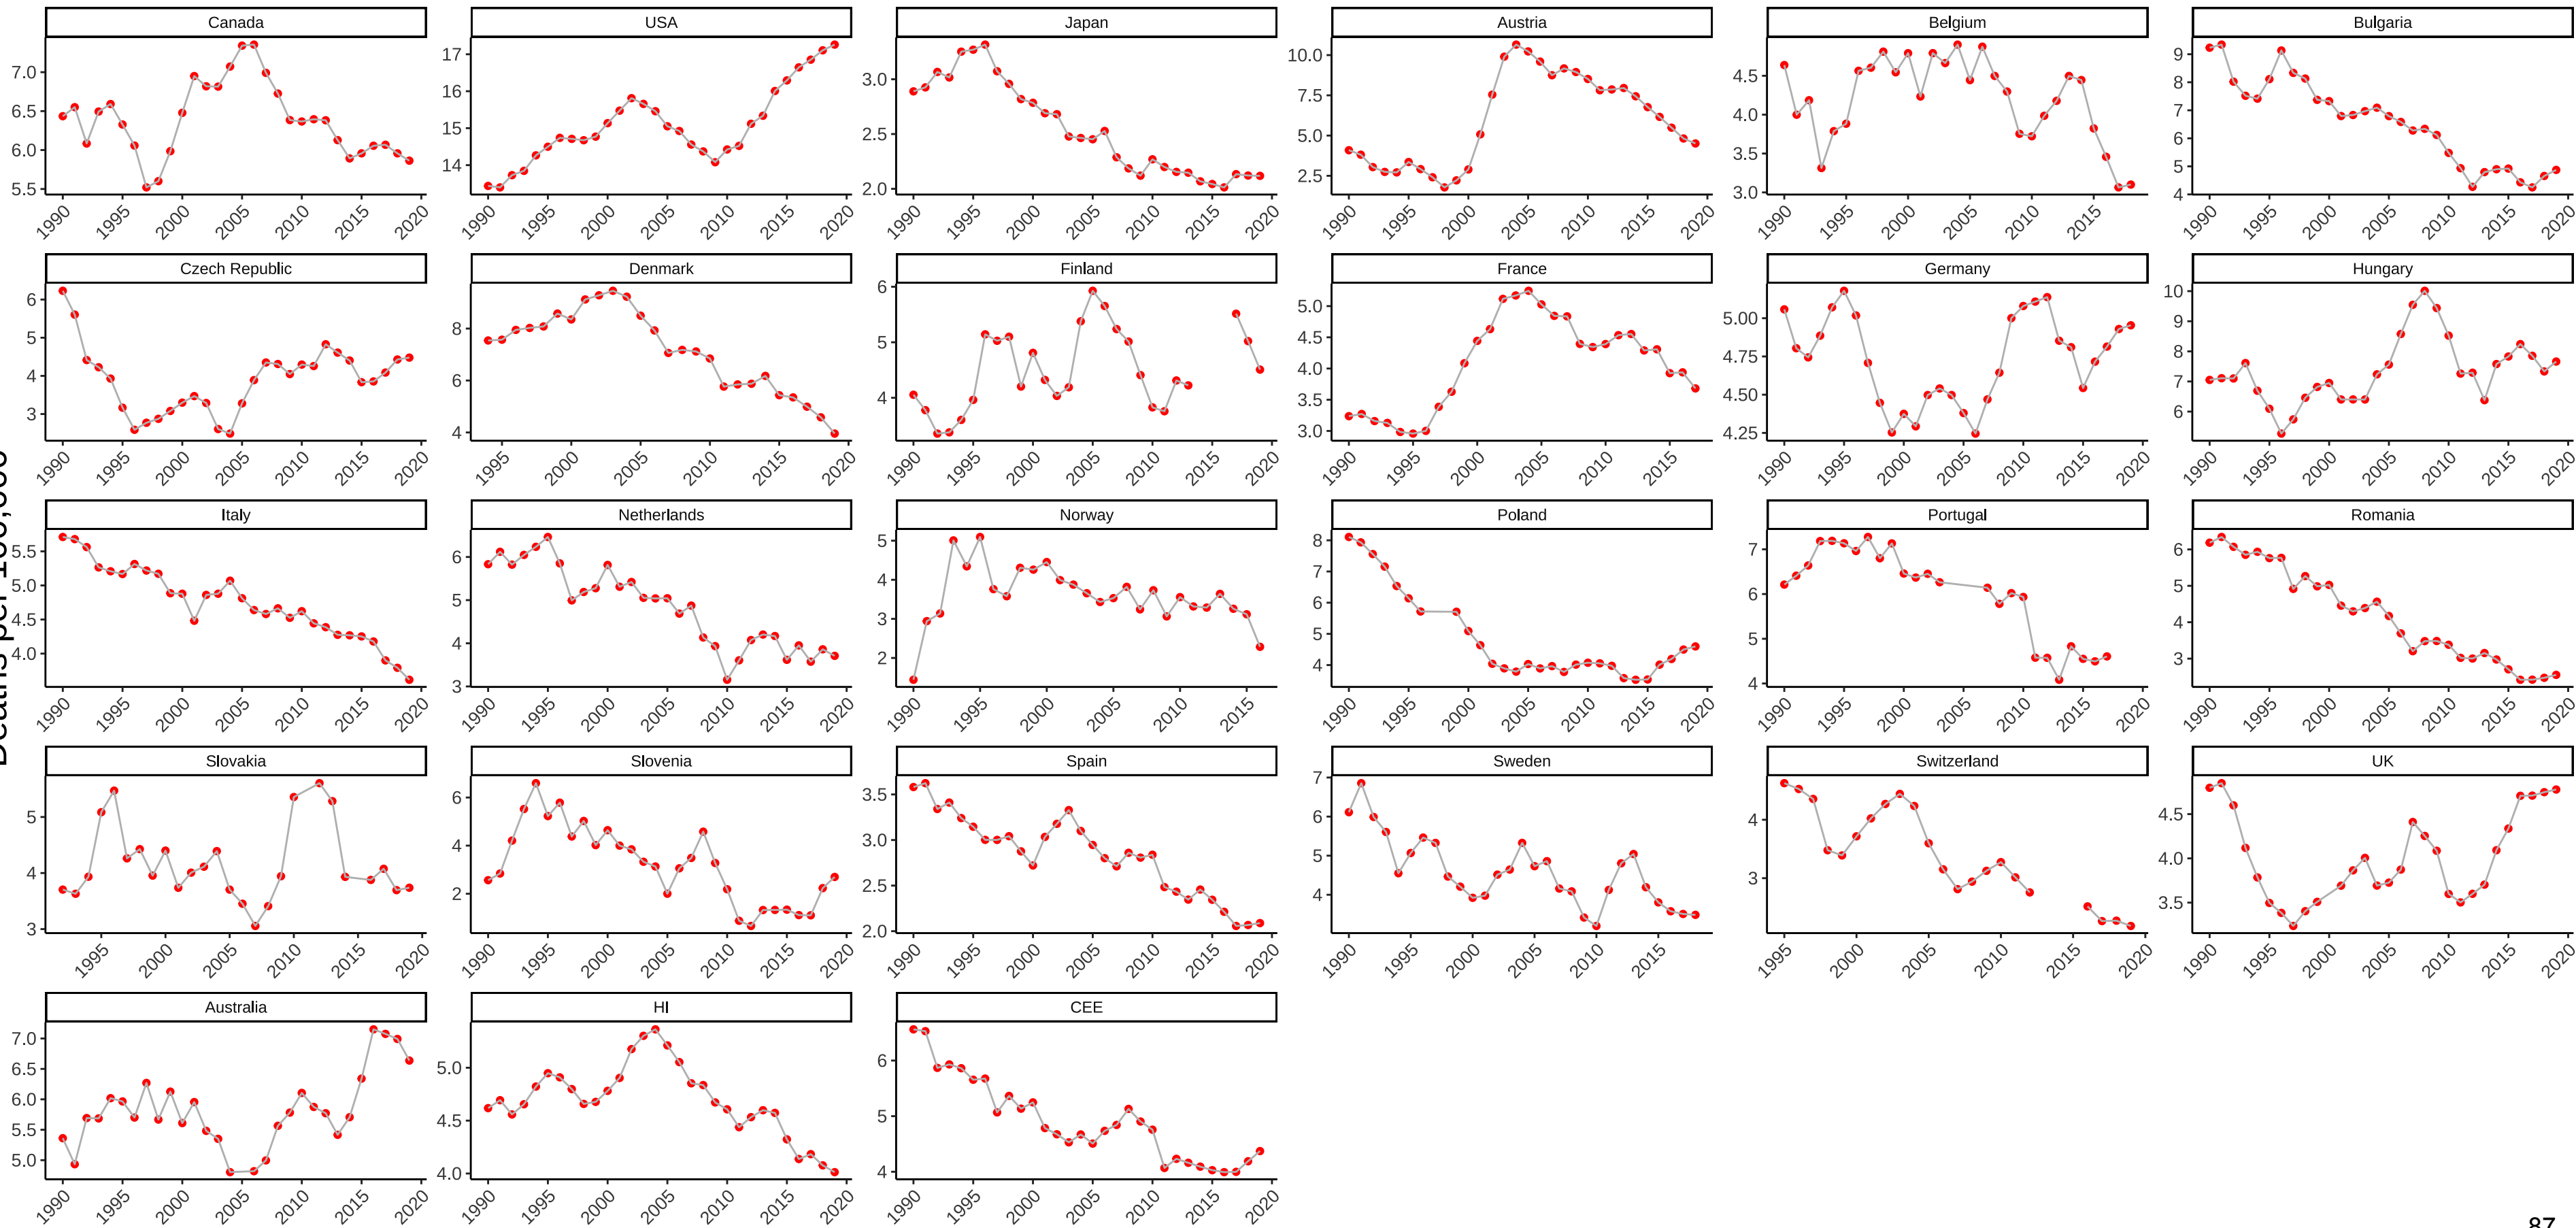

Year

**Figure S81. Three-Year Moving Average of Male Mortality from Cardiovascular Disease at Ages 45-54**

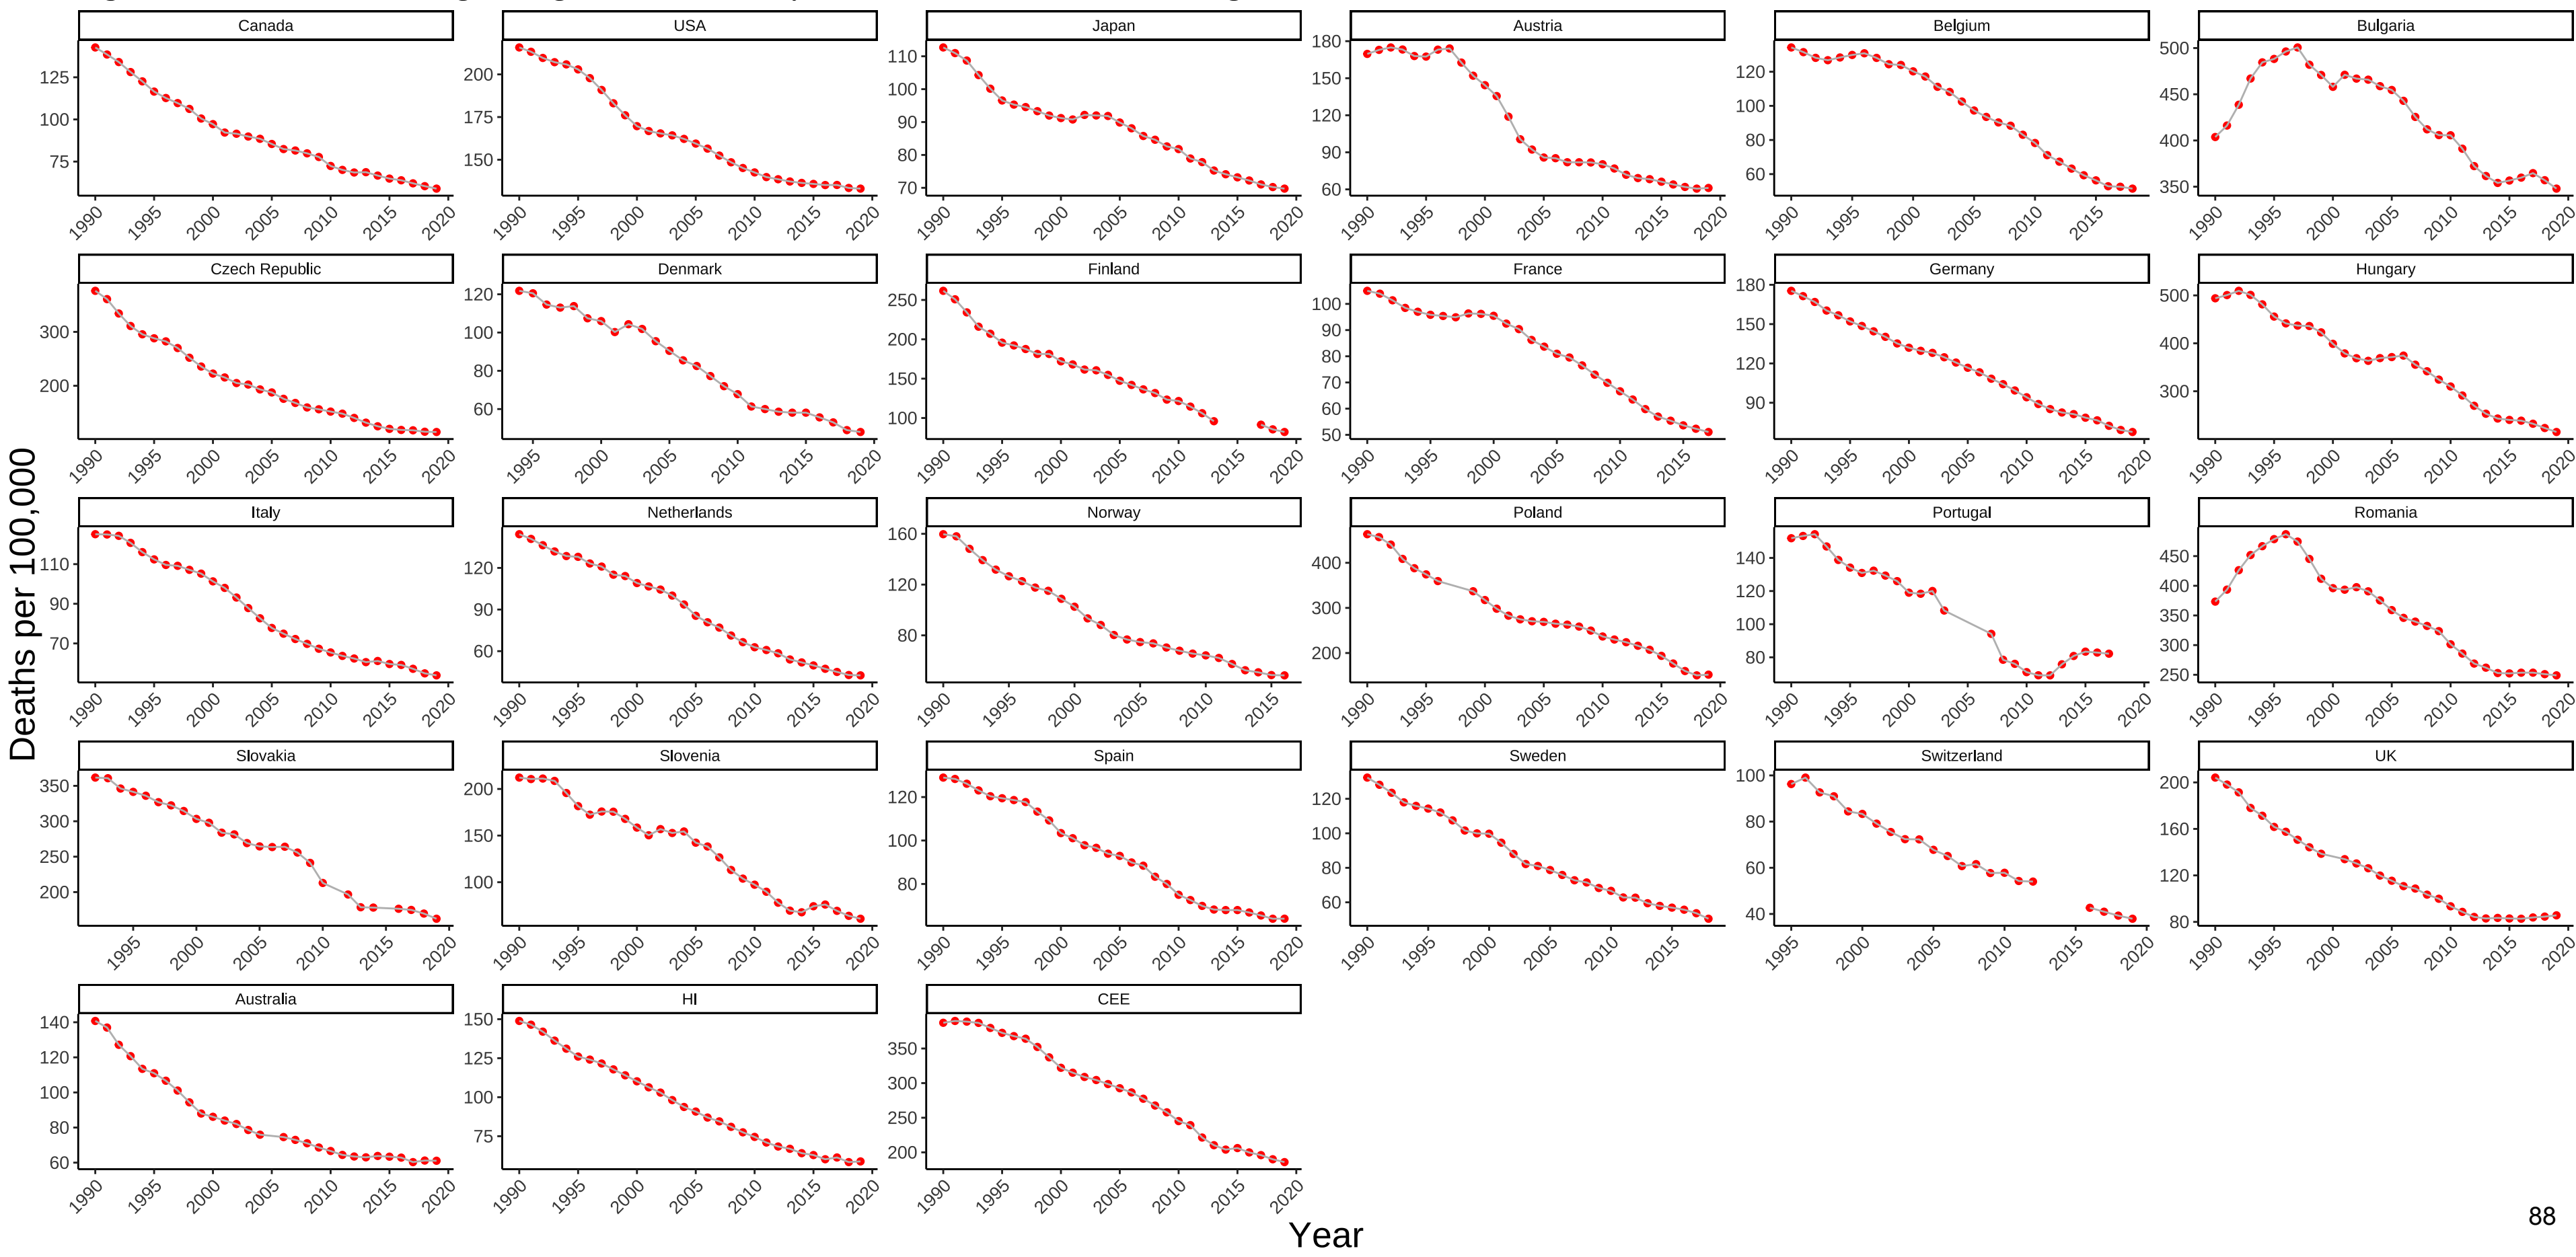

**Figure S82. Three-Year Moving Average of Female Mortality from Cardiovascular Disease at Ages 45-54**

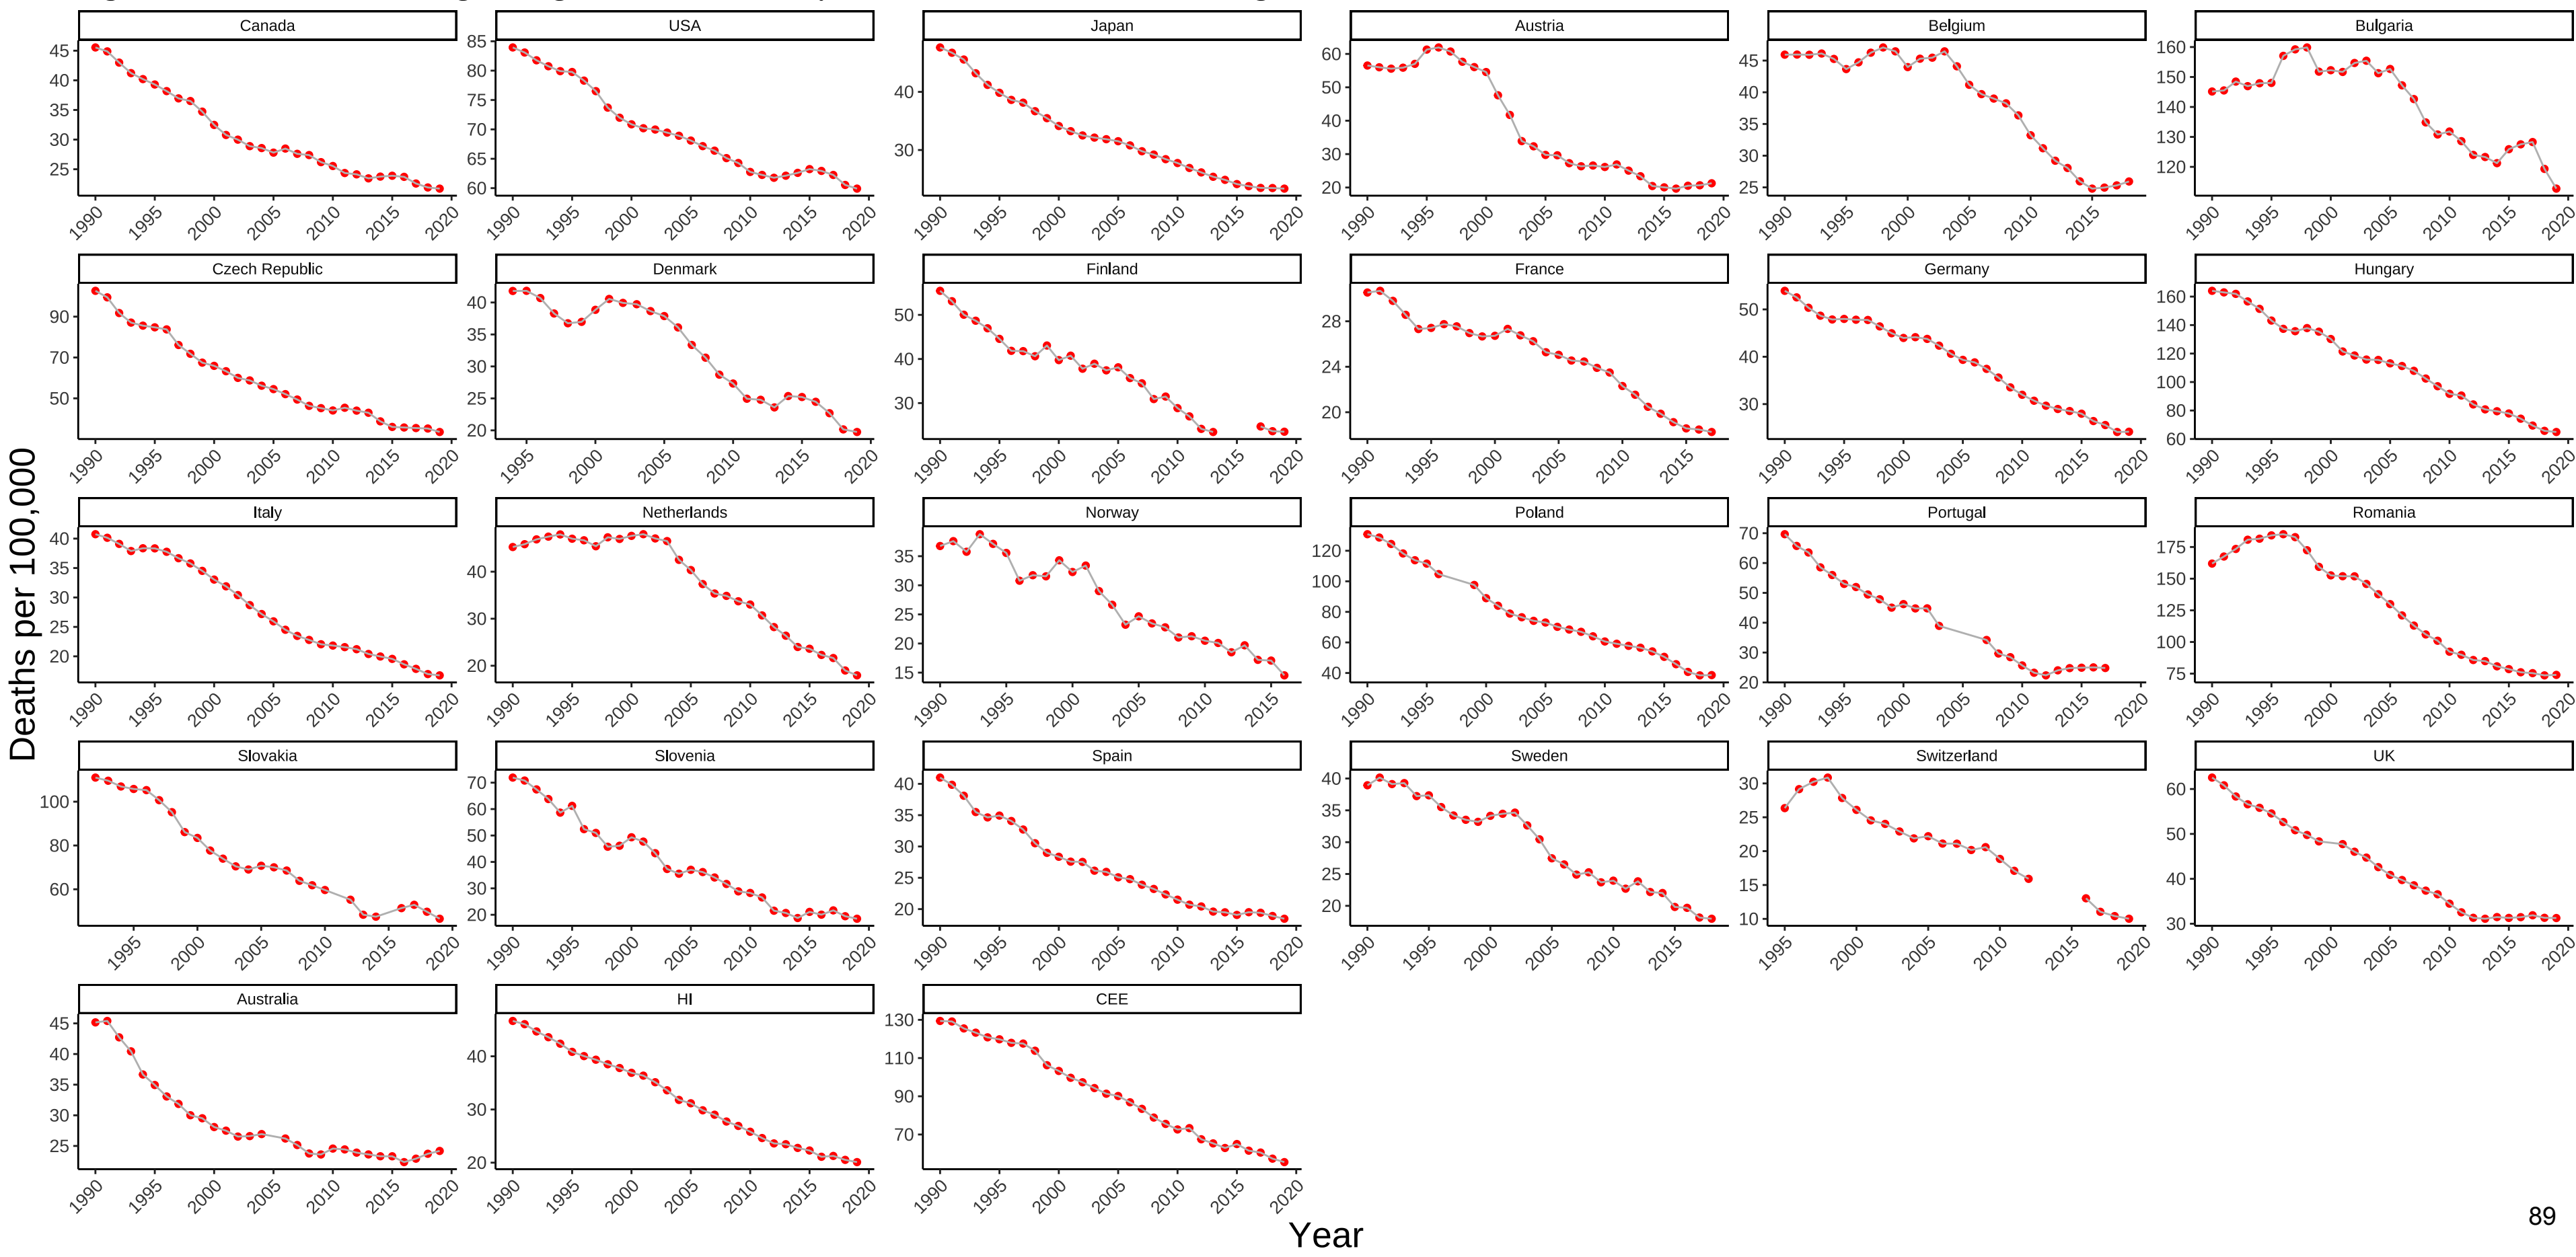

**Figure S83. Three-Year Moving Average of Male Mortality from Suicide at Ages 45-54**

Deaths per 100,000

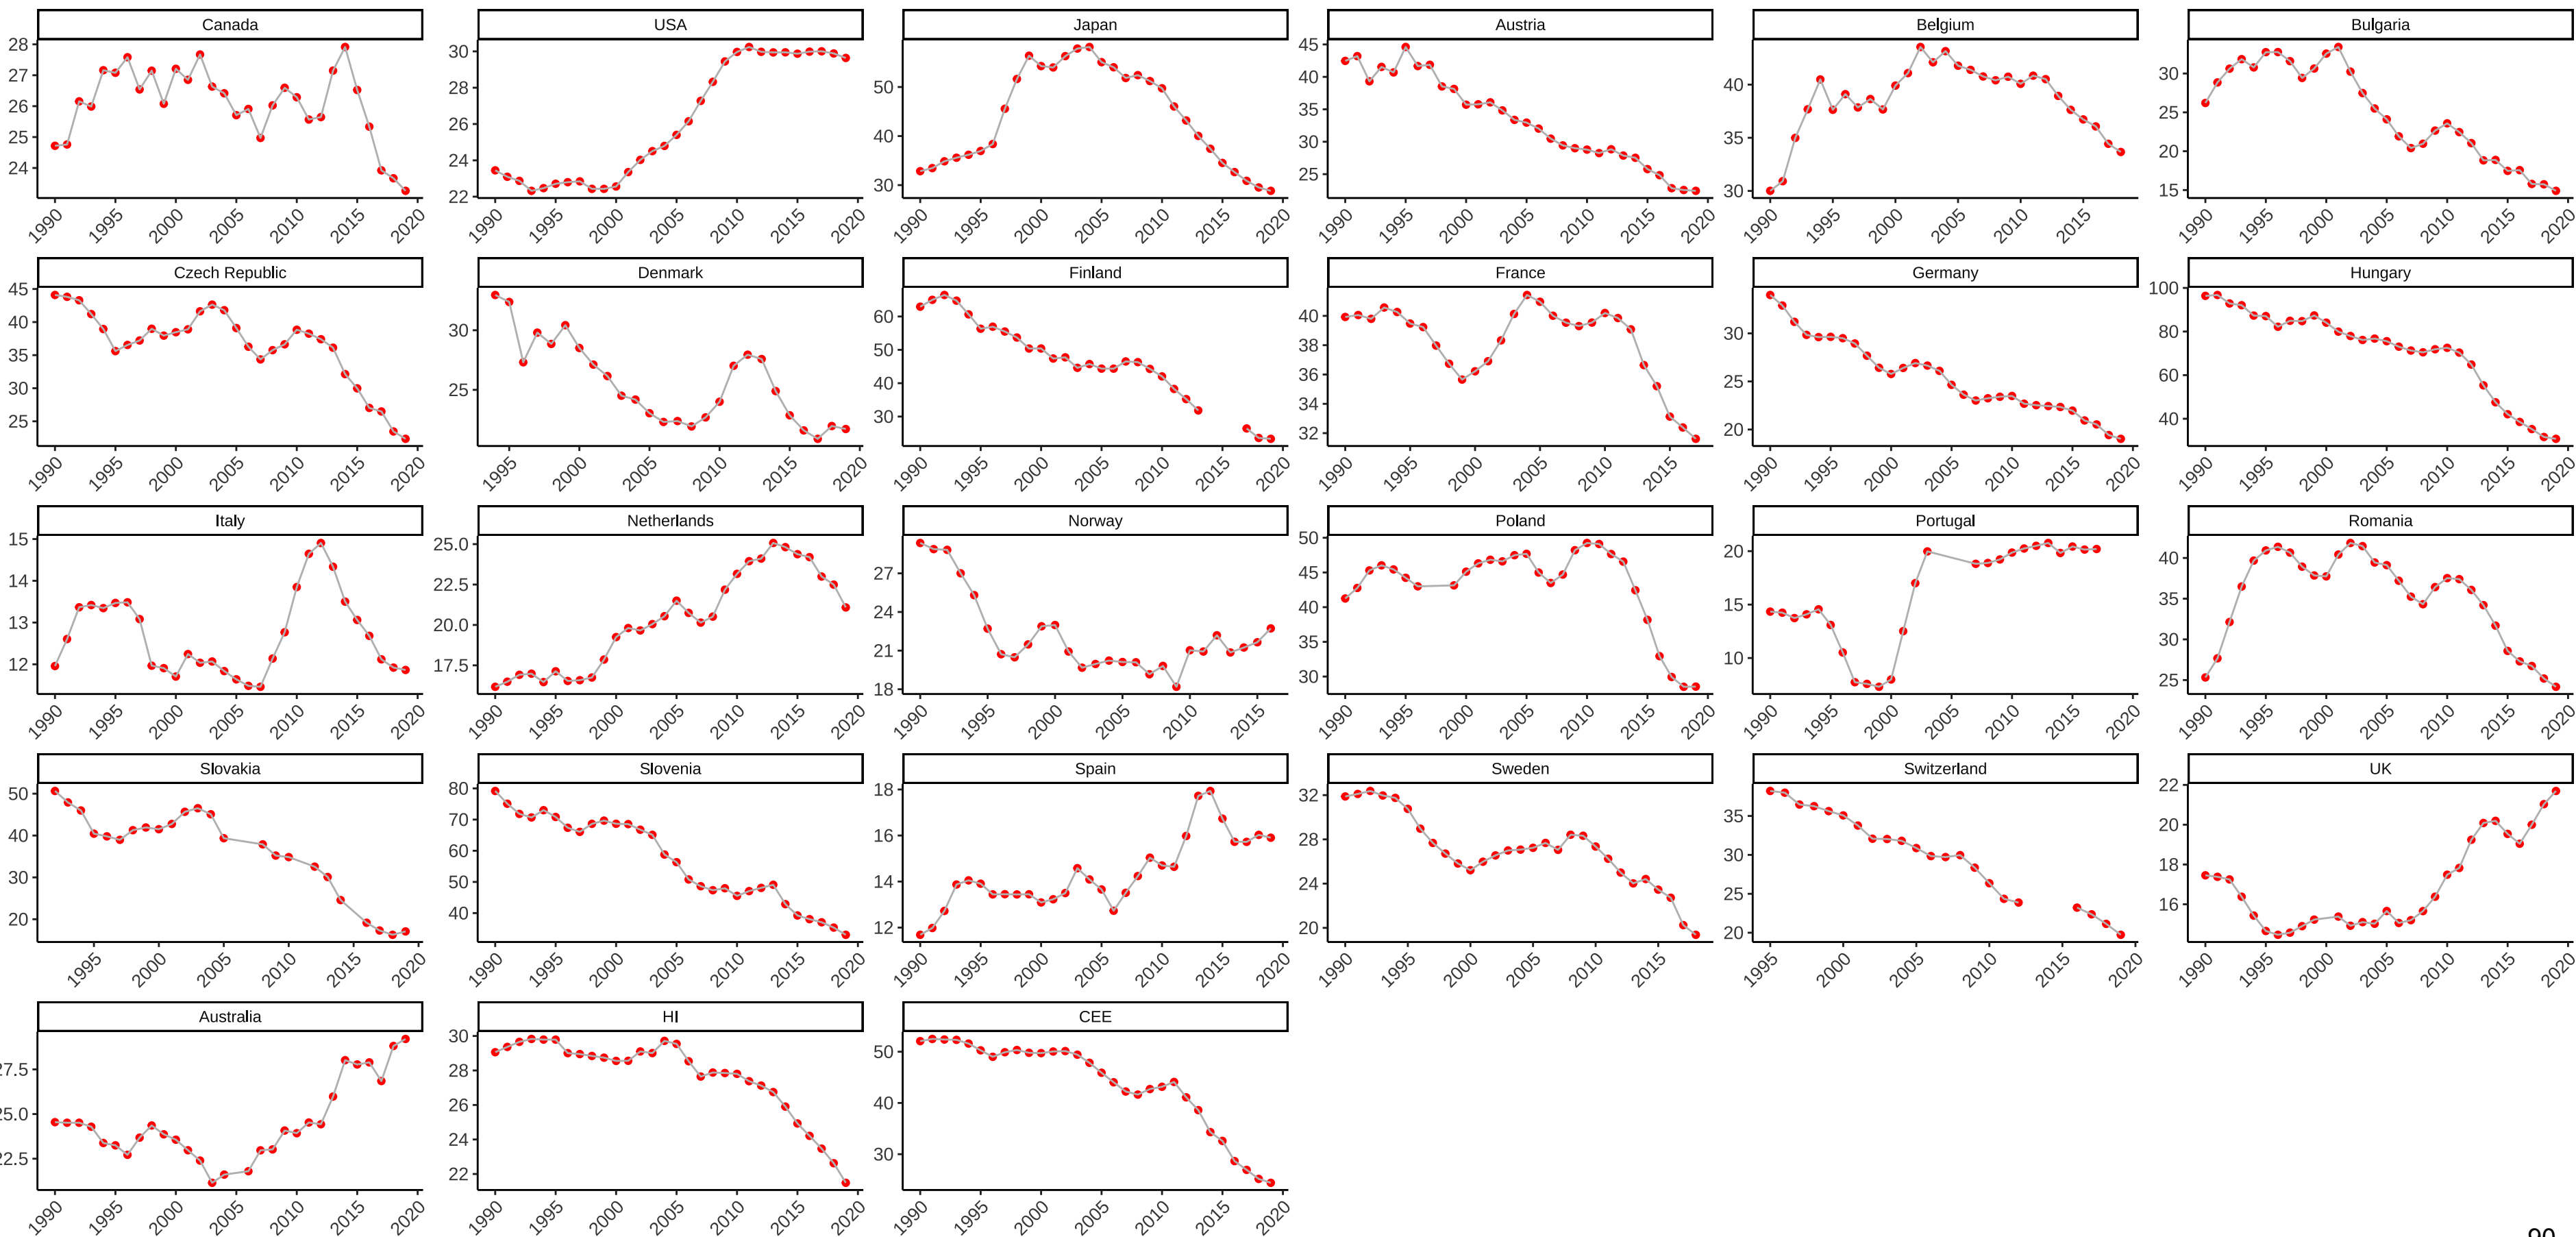

Year

**Figure S84. Three-Year Moving Average of Female Mortality from Suicide at Ages 45-54**

Deaths per 100,000

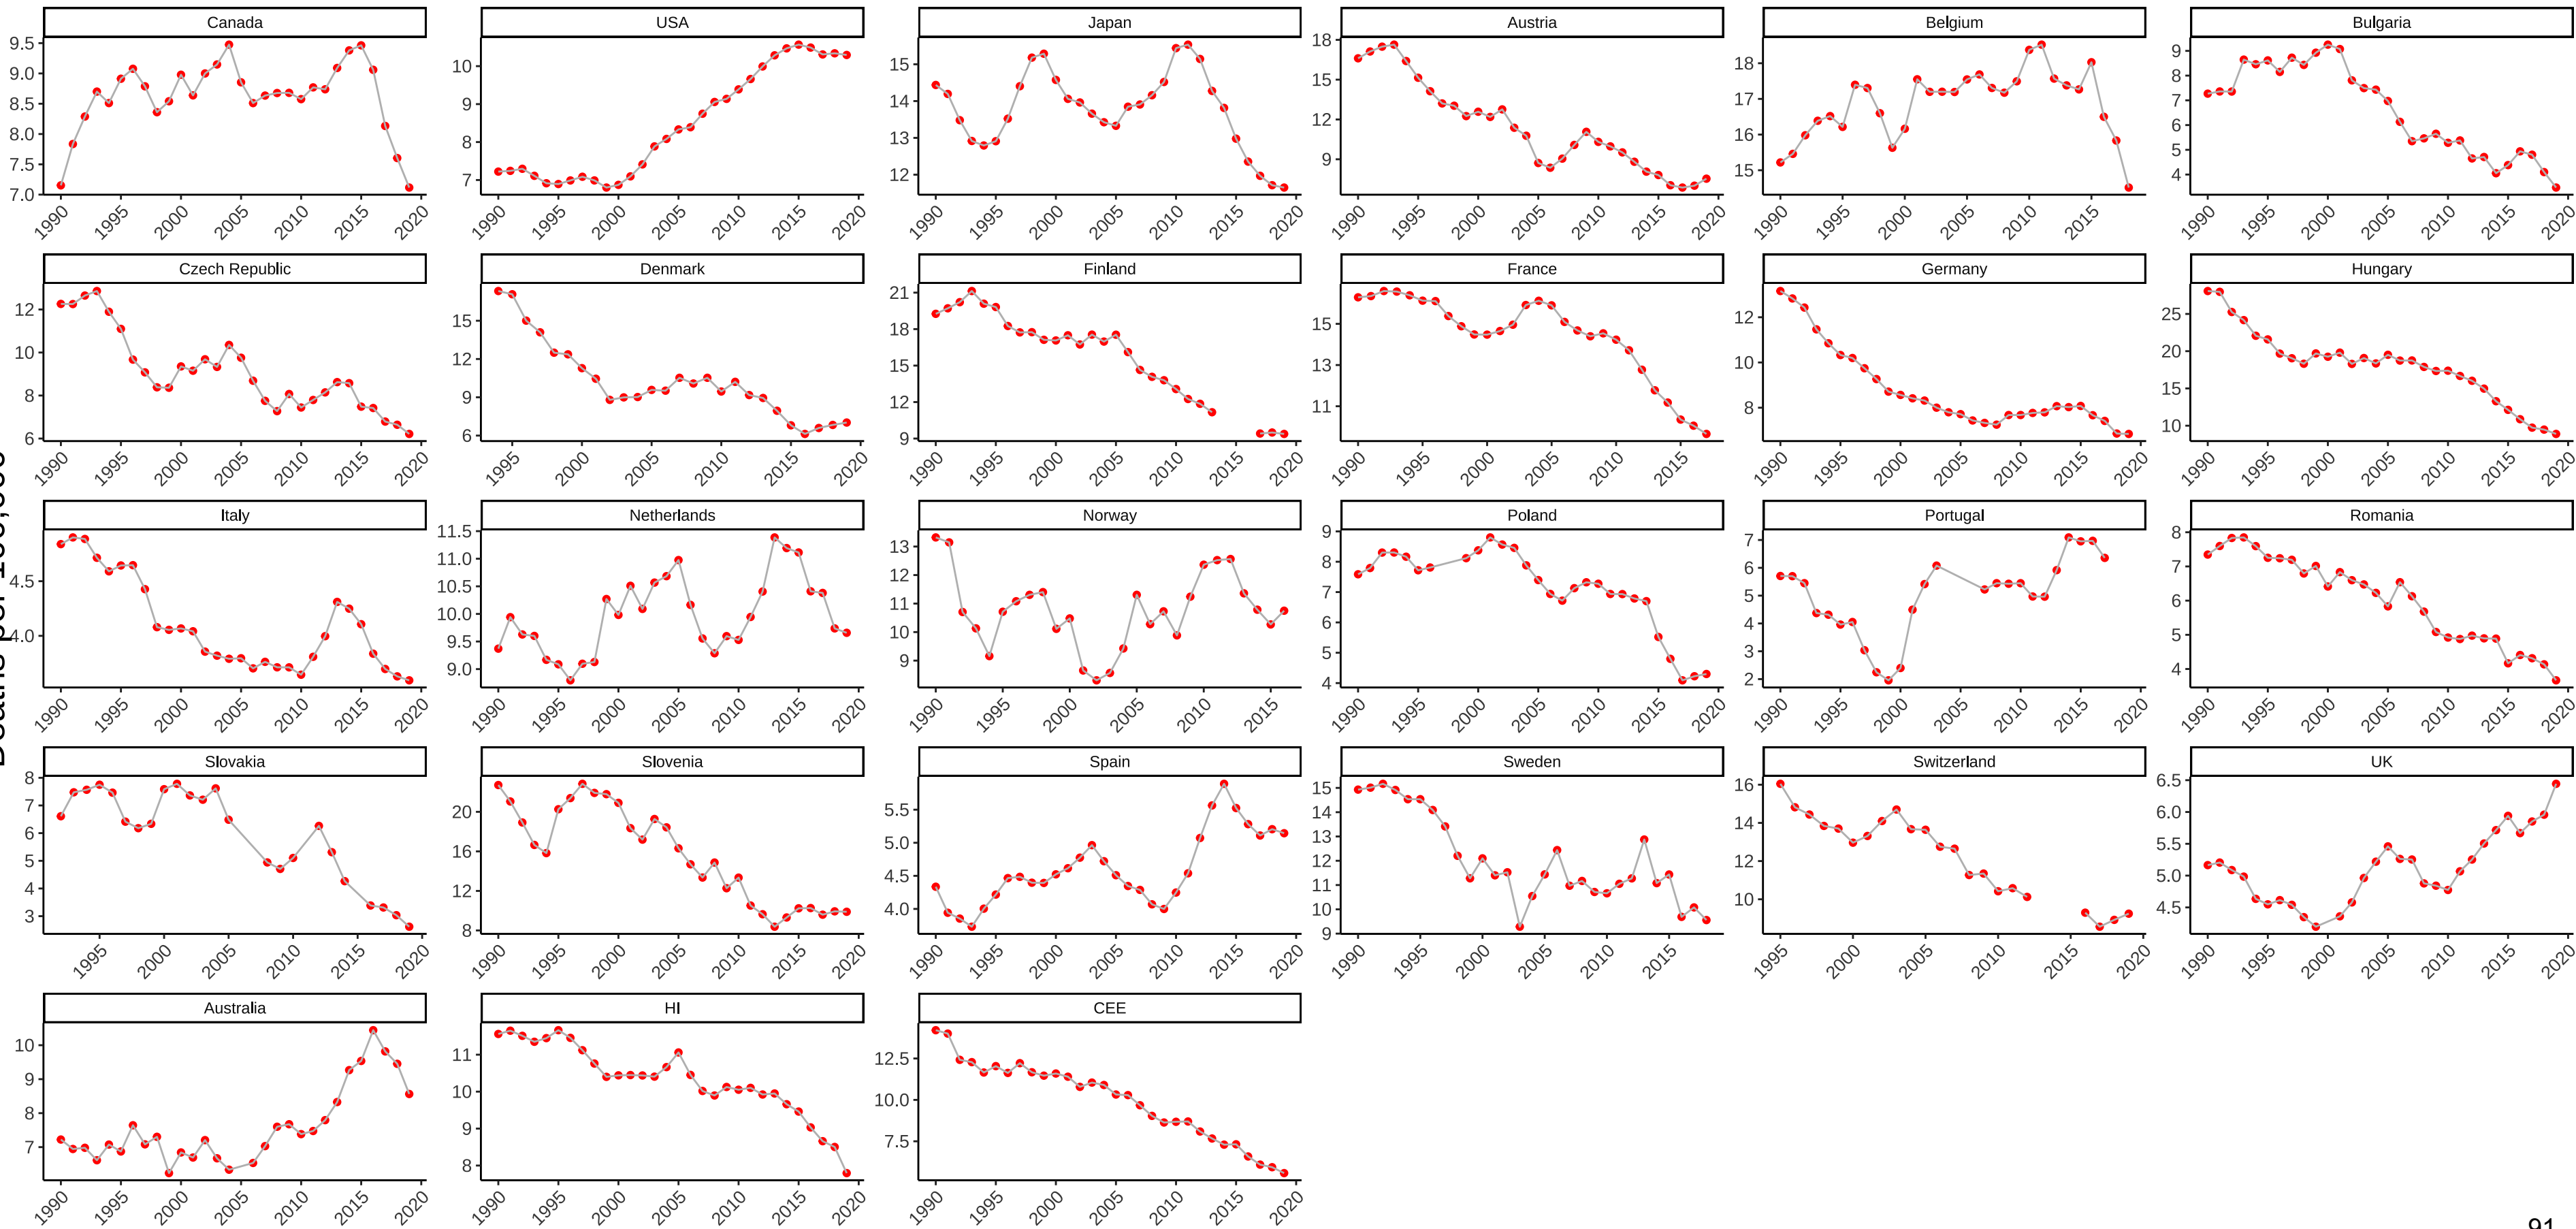

Year

**Figure S85. Three-Year Moving Average of Male Mortality from Homicide at Ages 45-54**

Deaths per 100,000

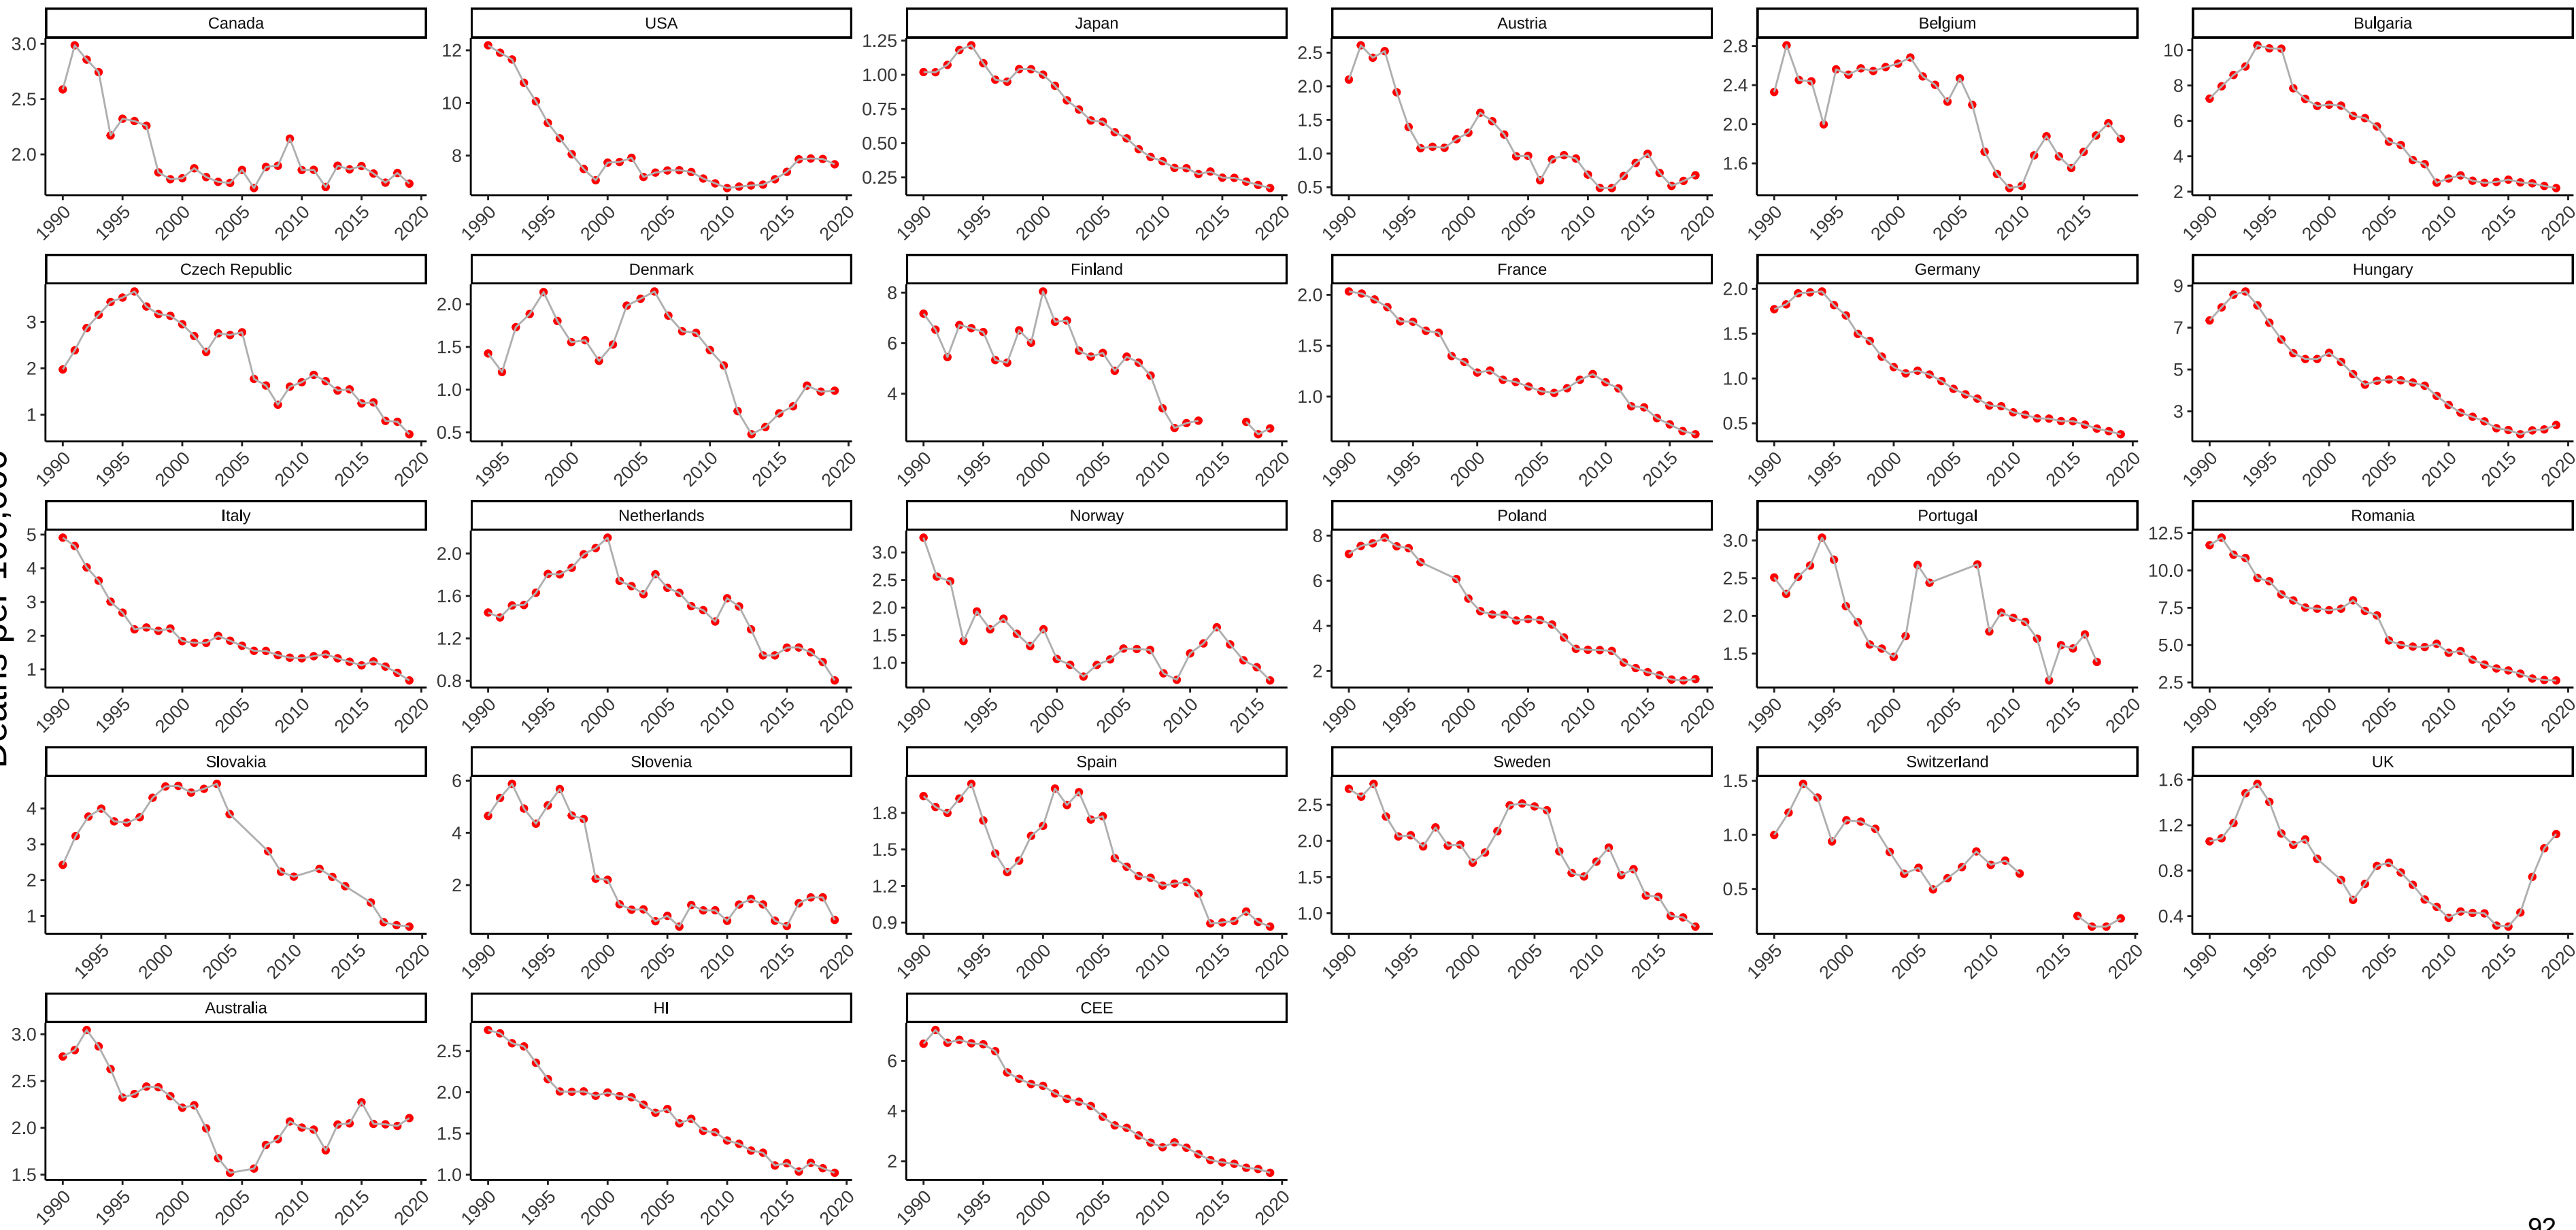

Year

**Figure S86. Three-Year Moving Average of Female Mortality from Homicide at Ages 45-54**

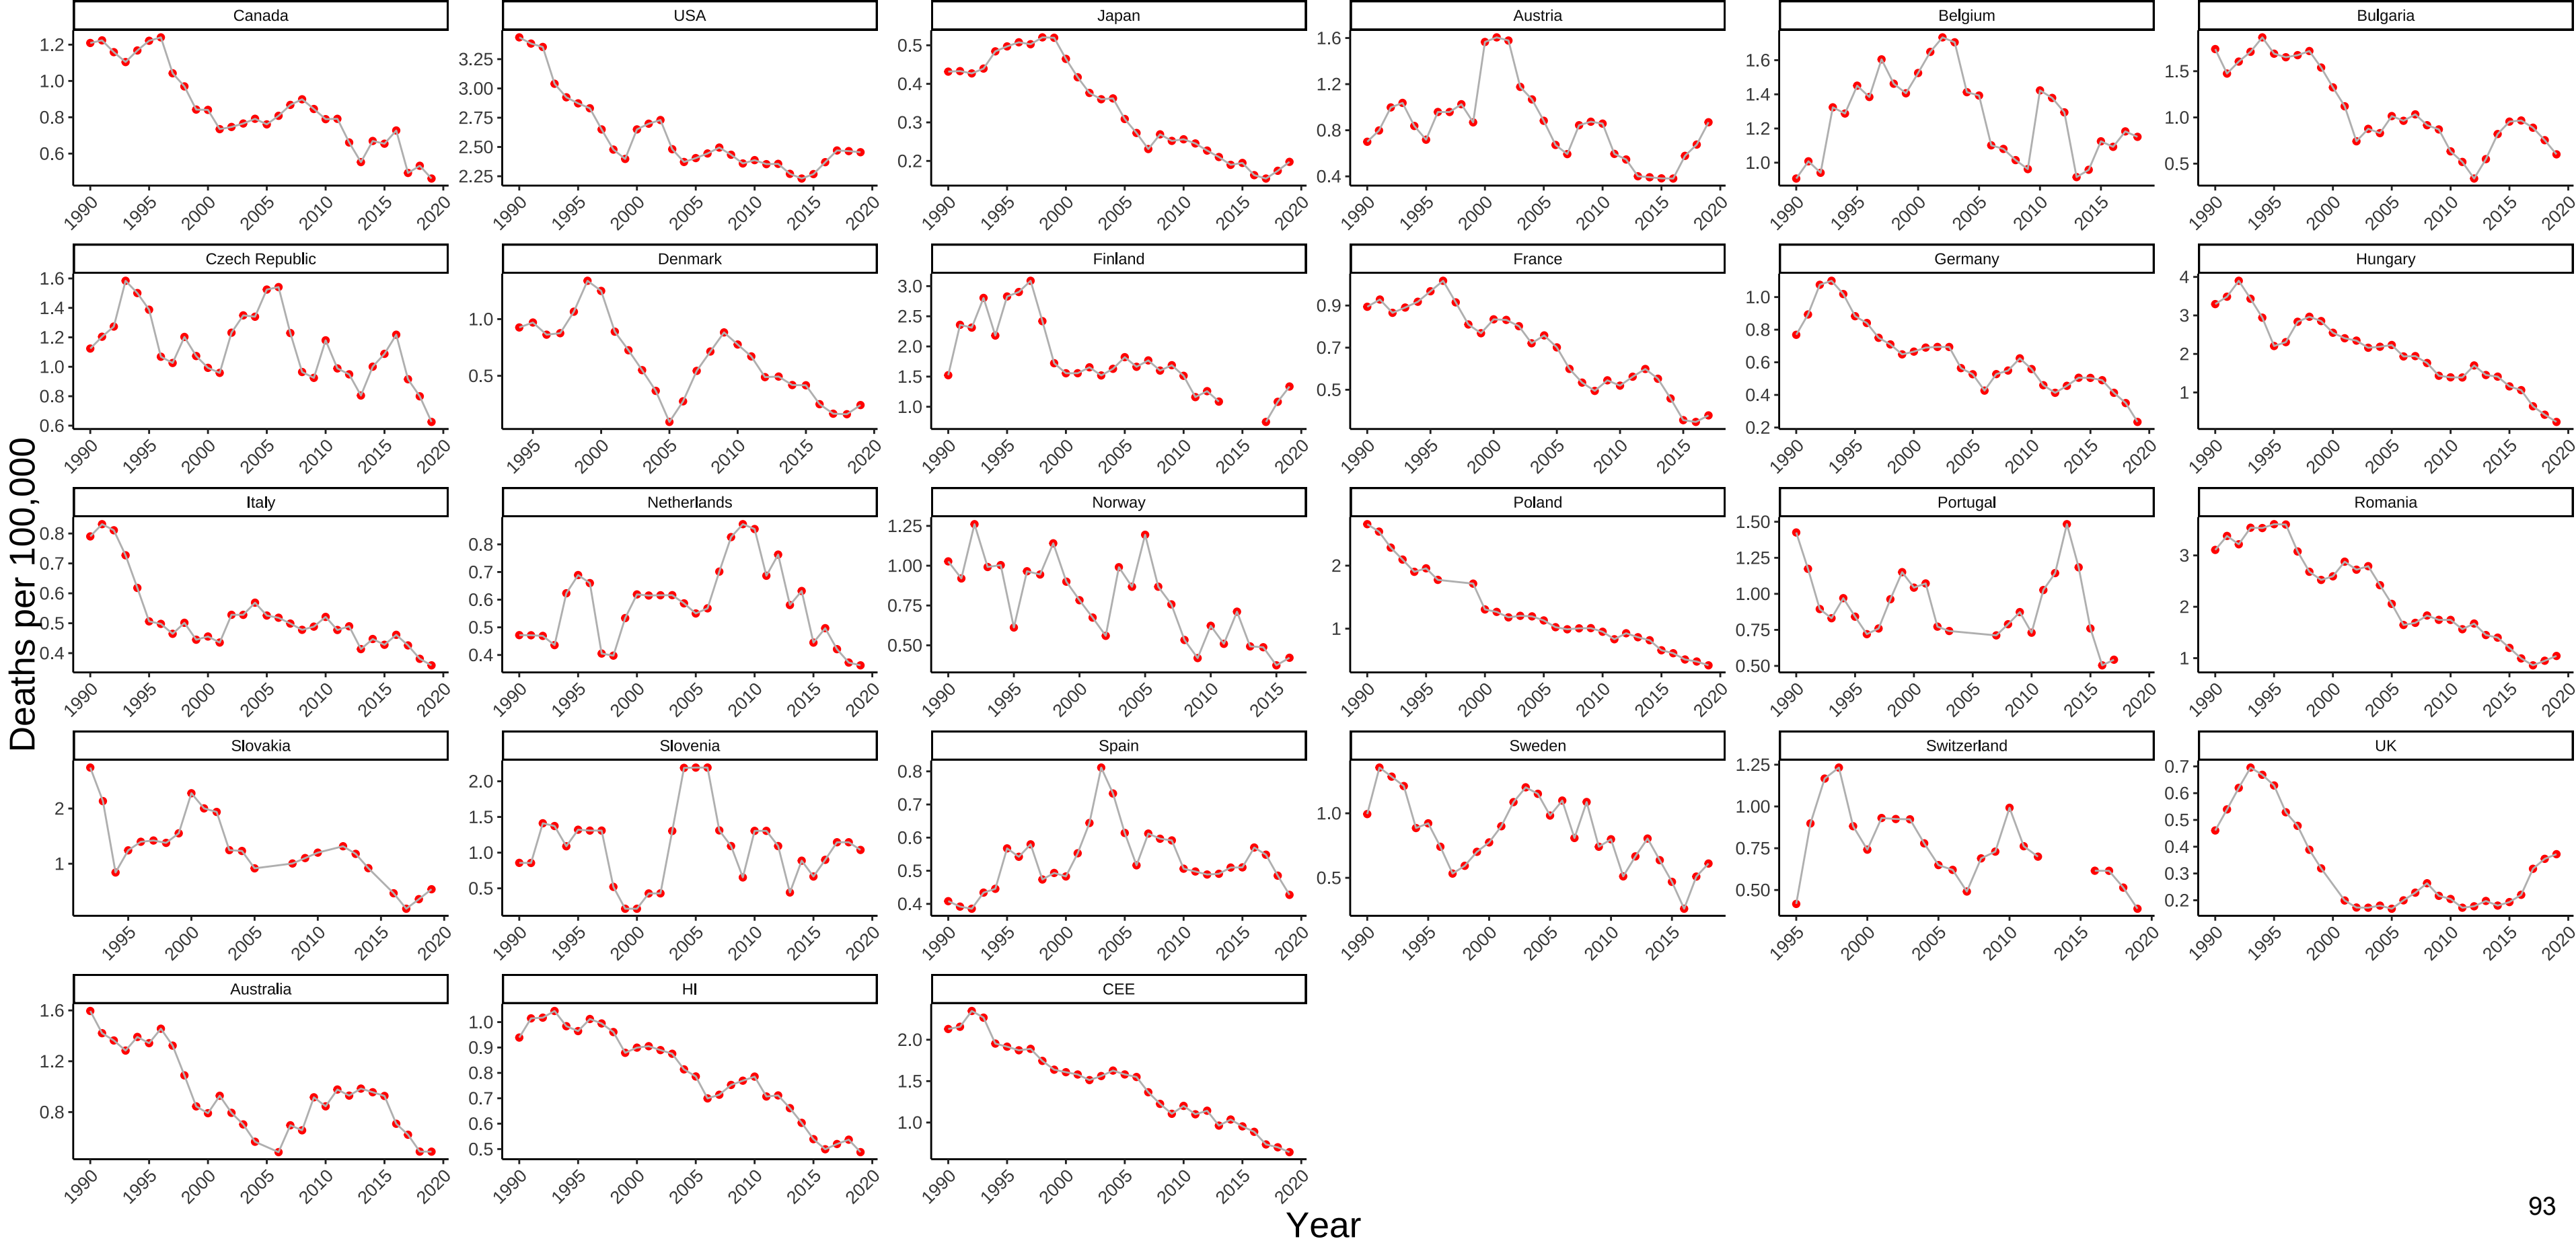

**Figure S87. Three-Year Moving Average of Male Mortality from Transport Accidents at Ages 45-54**

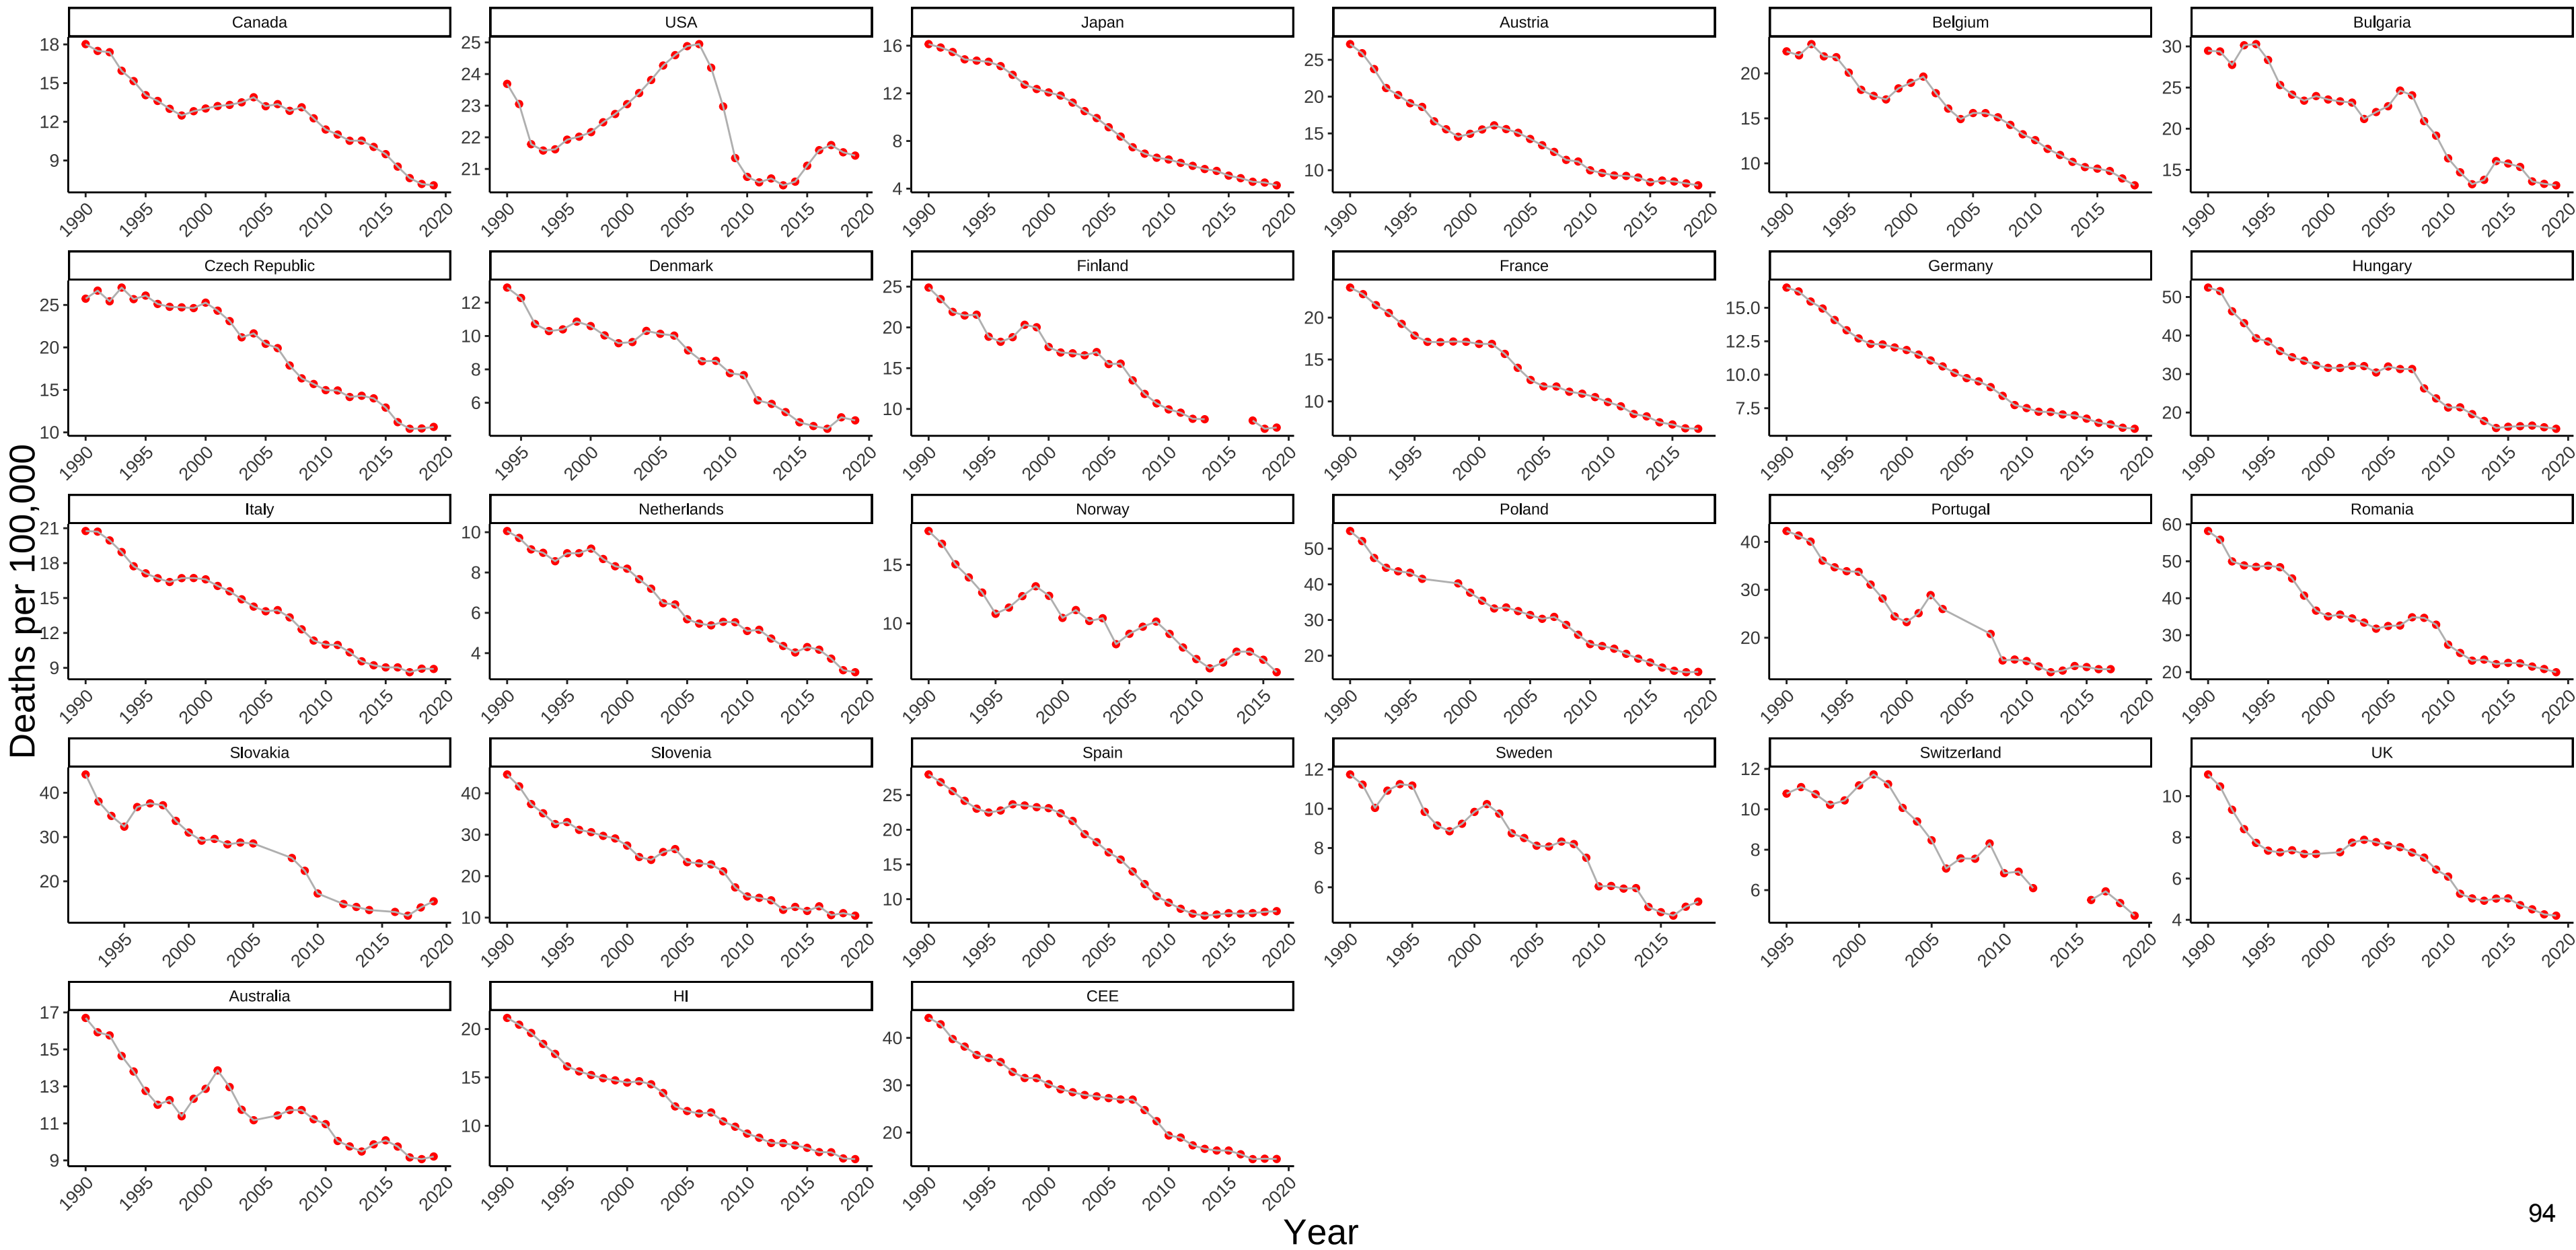

**Figure S88. Three-Year Moving Average of Female Mortality from Transport Accidents at Ages 45-54**

Deaths per 100,000

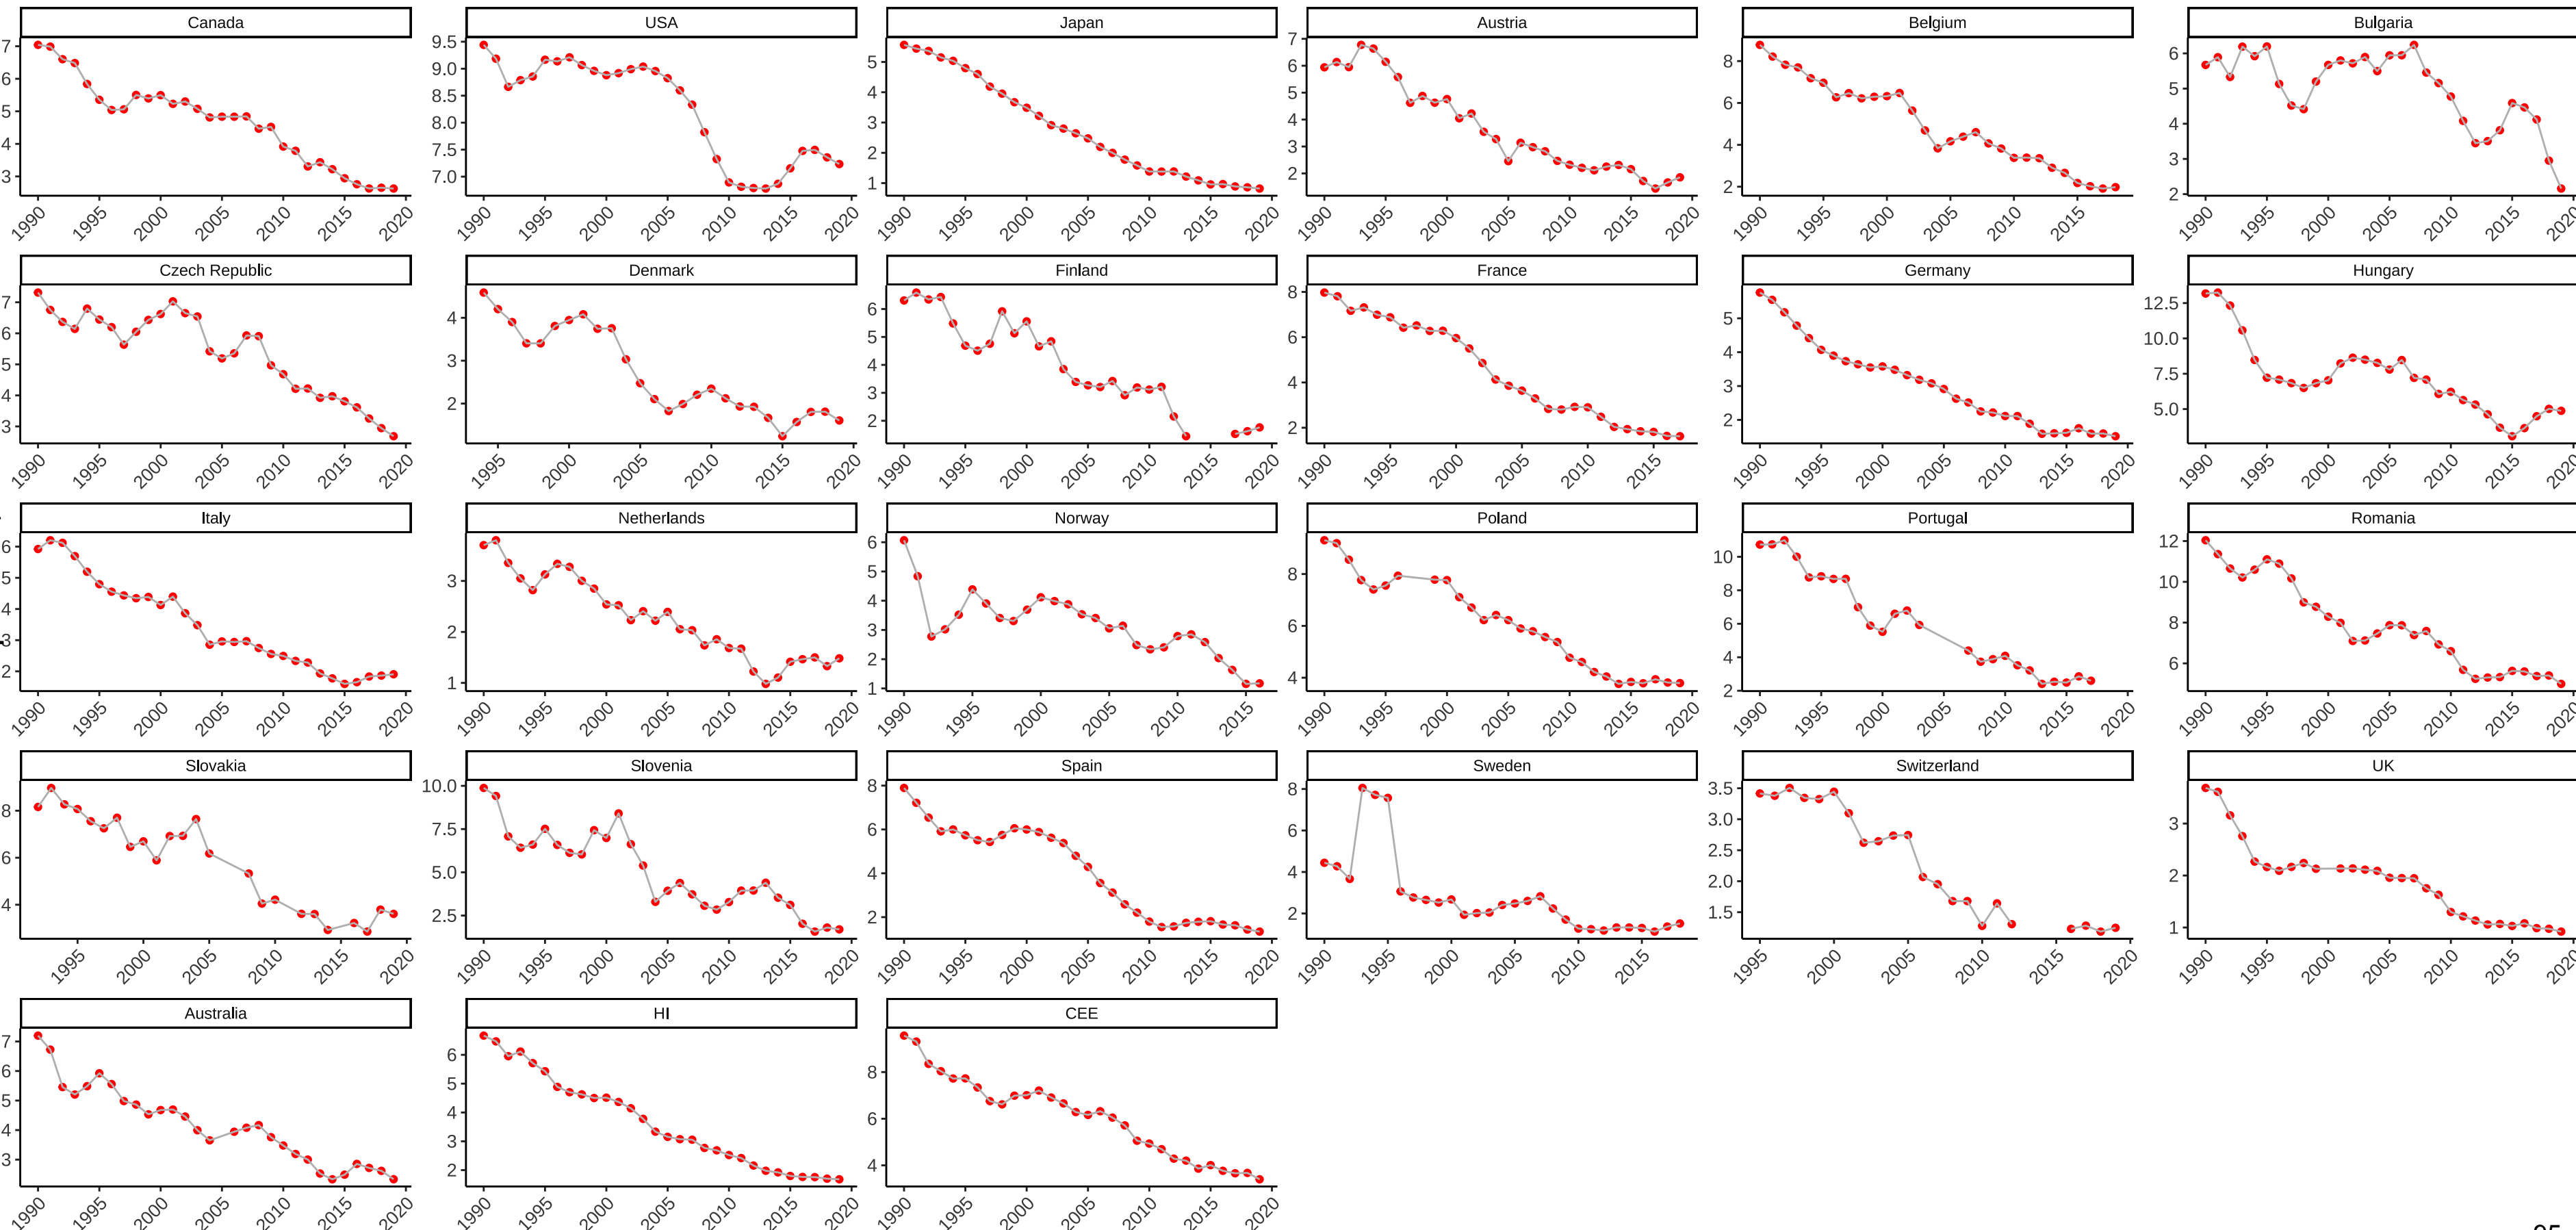

Year

**Figure S89. Three-Year Moving Average of Male Mortality from Other External Causes at Ages 45-54**

Deaths per 100,000

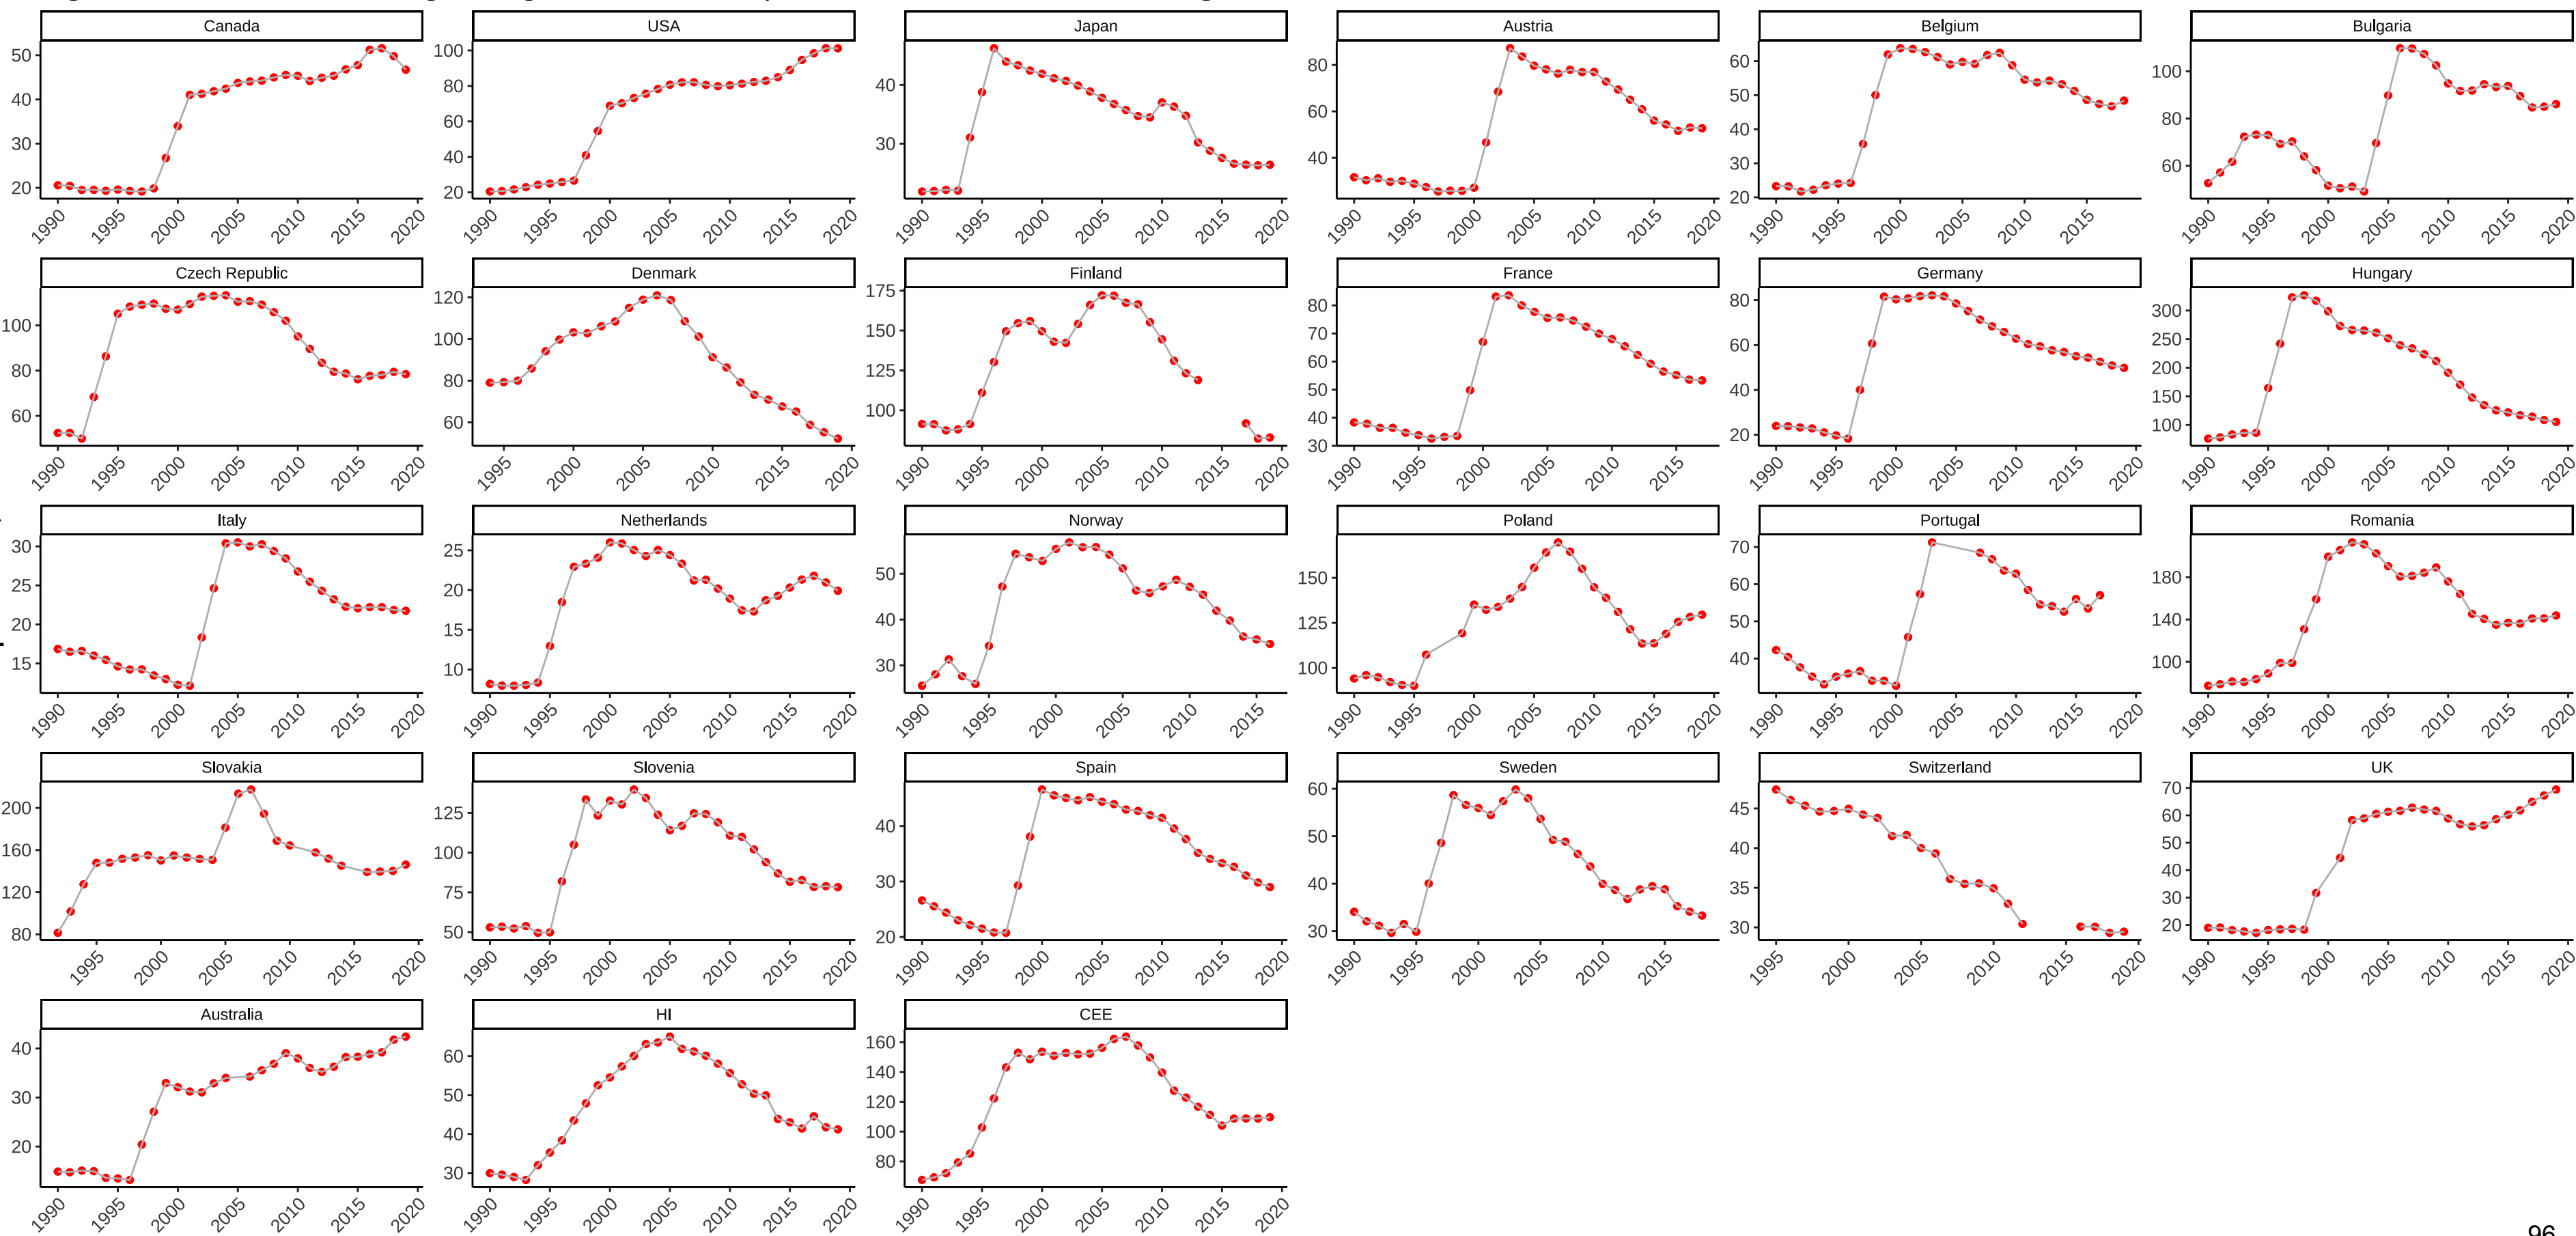

Year

**Figure S90. Three-Year Moving Average of Female Mortality from Other External Causes at Ages 45-54**

Deaths per 100,000

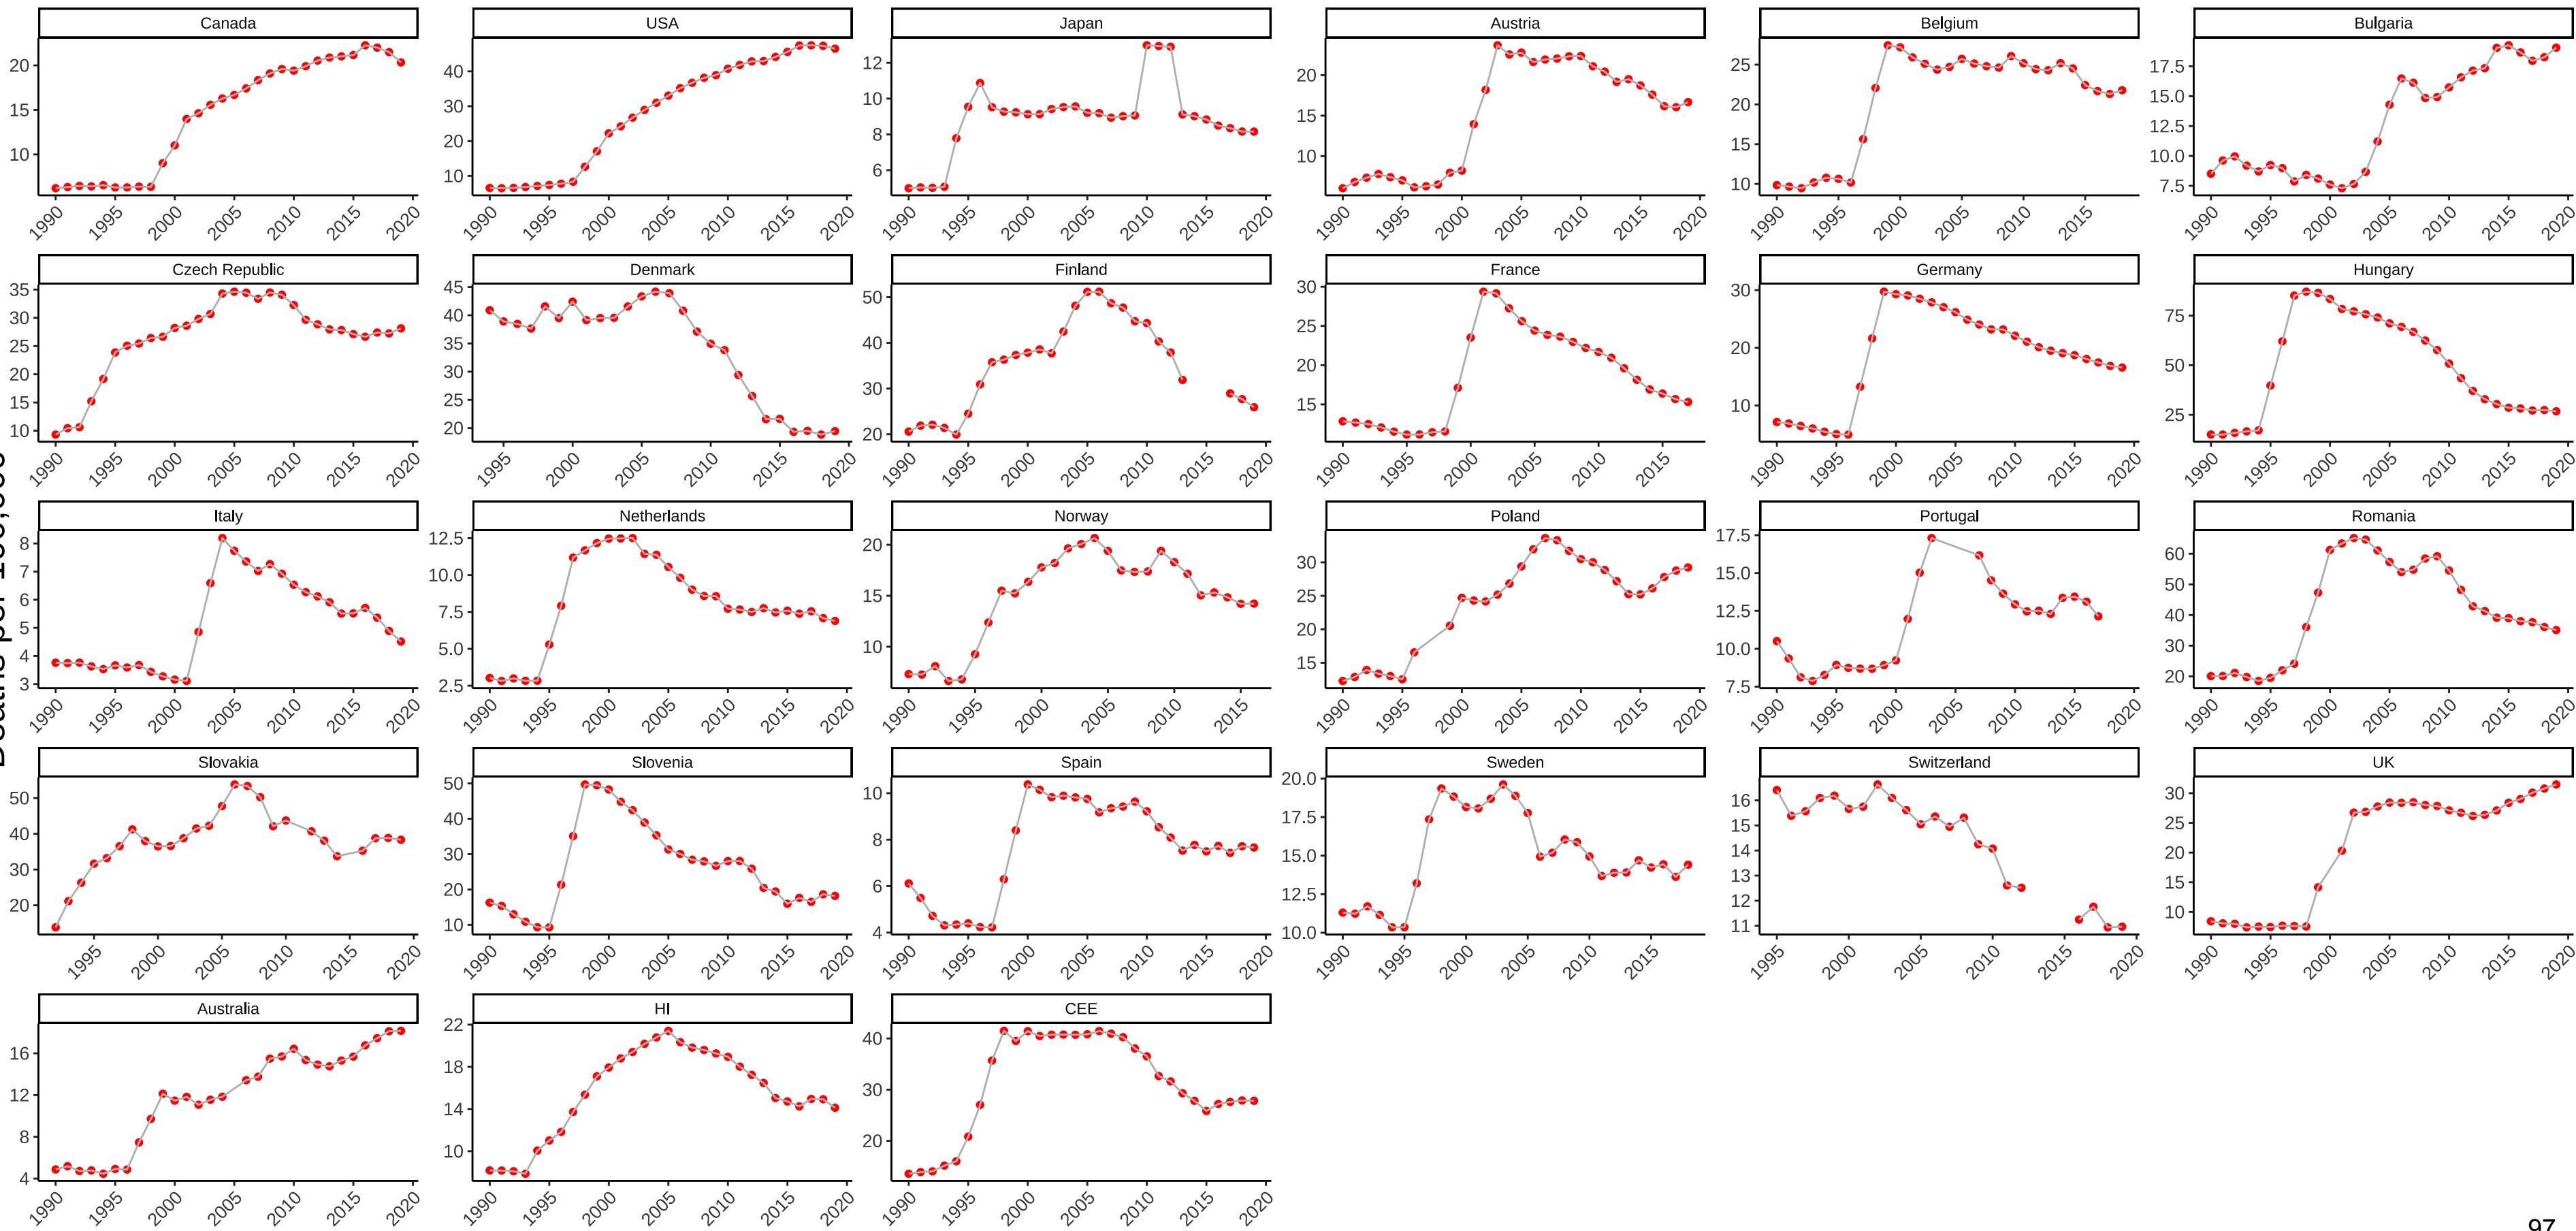

Year

**Figure S91. Three-Year Moving Average of Male Mortality from All Other Causes at Ages 45-54**

Deaths per 100,000

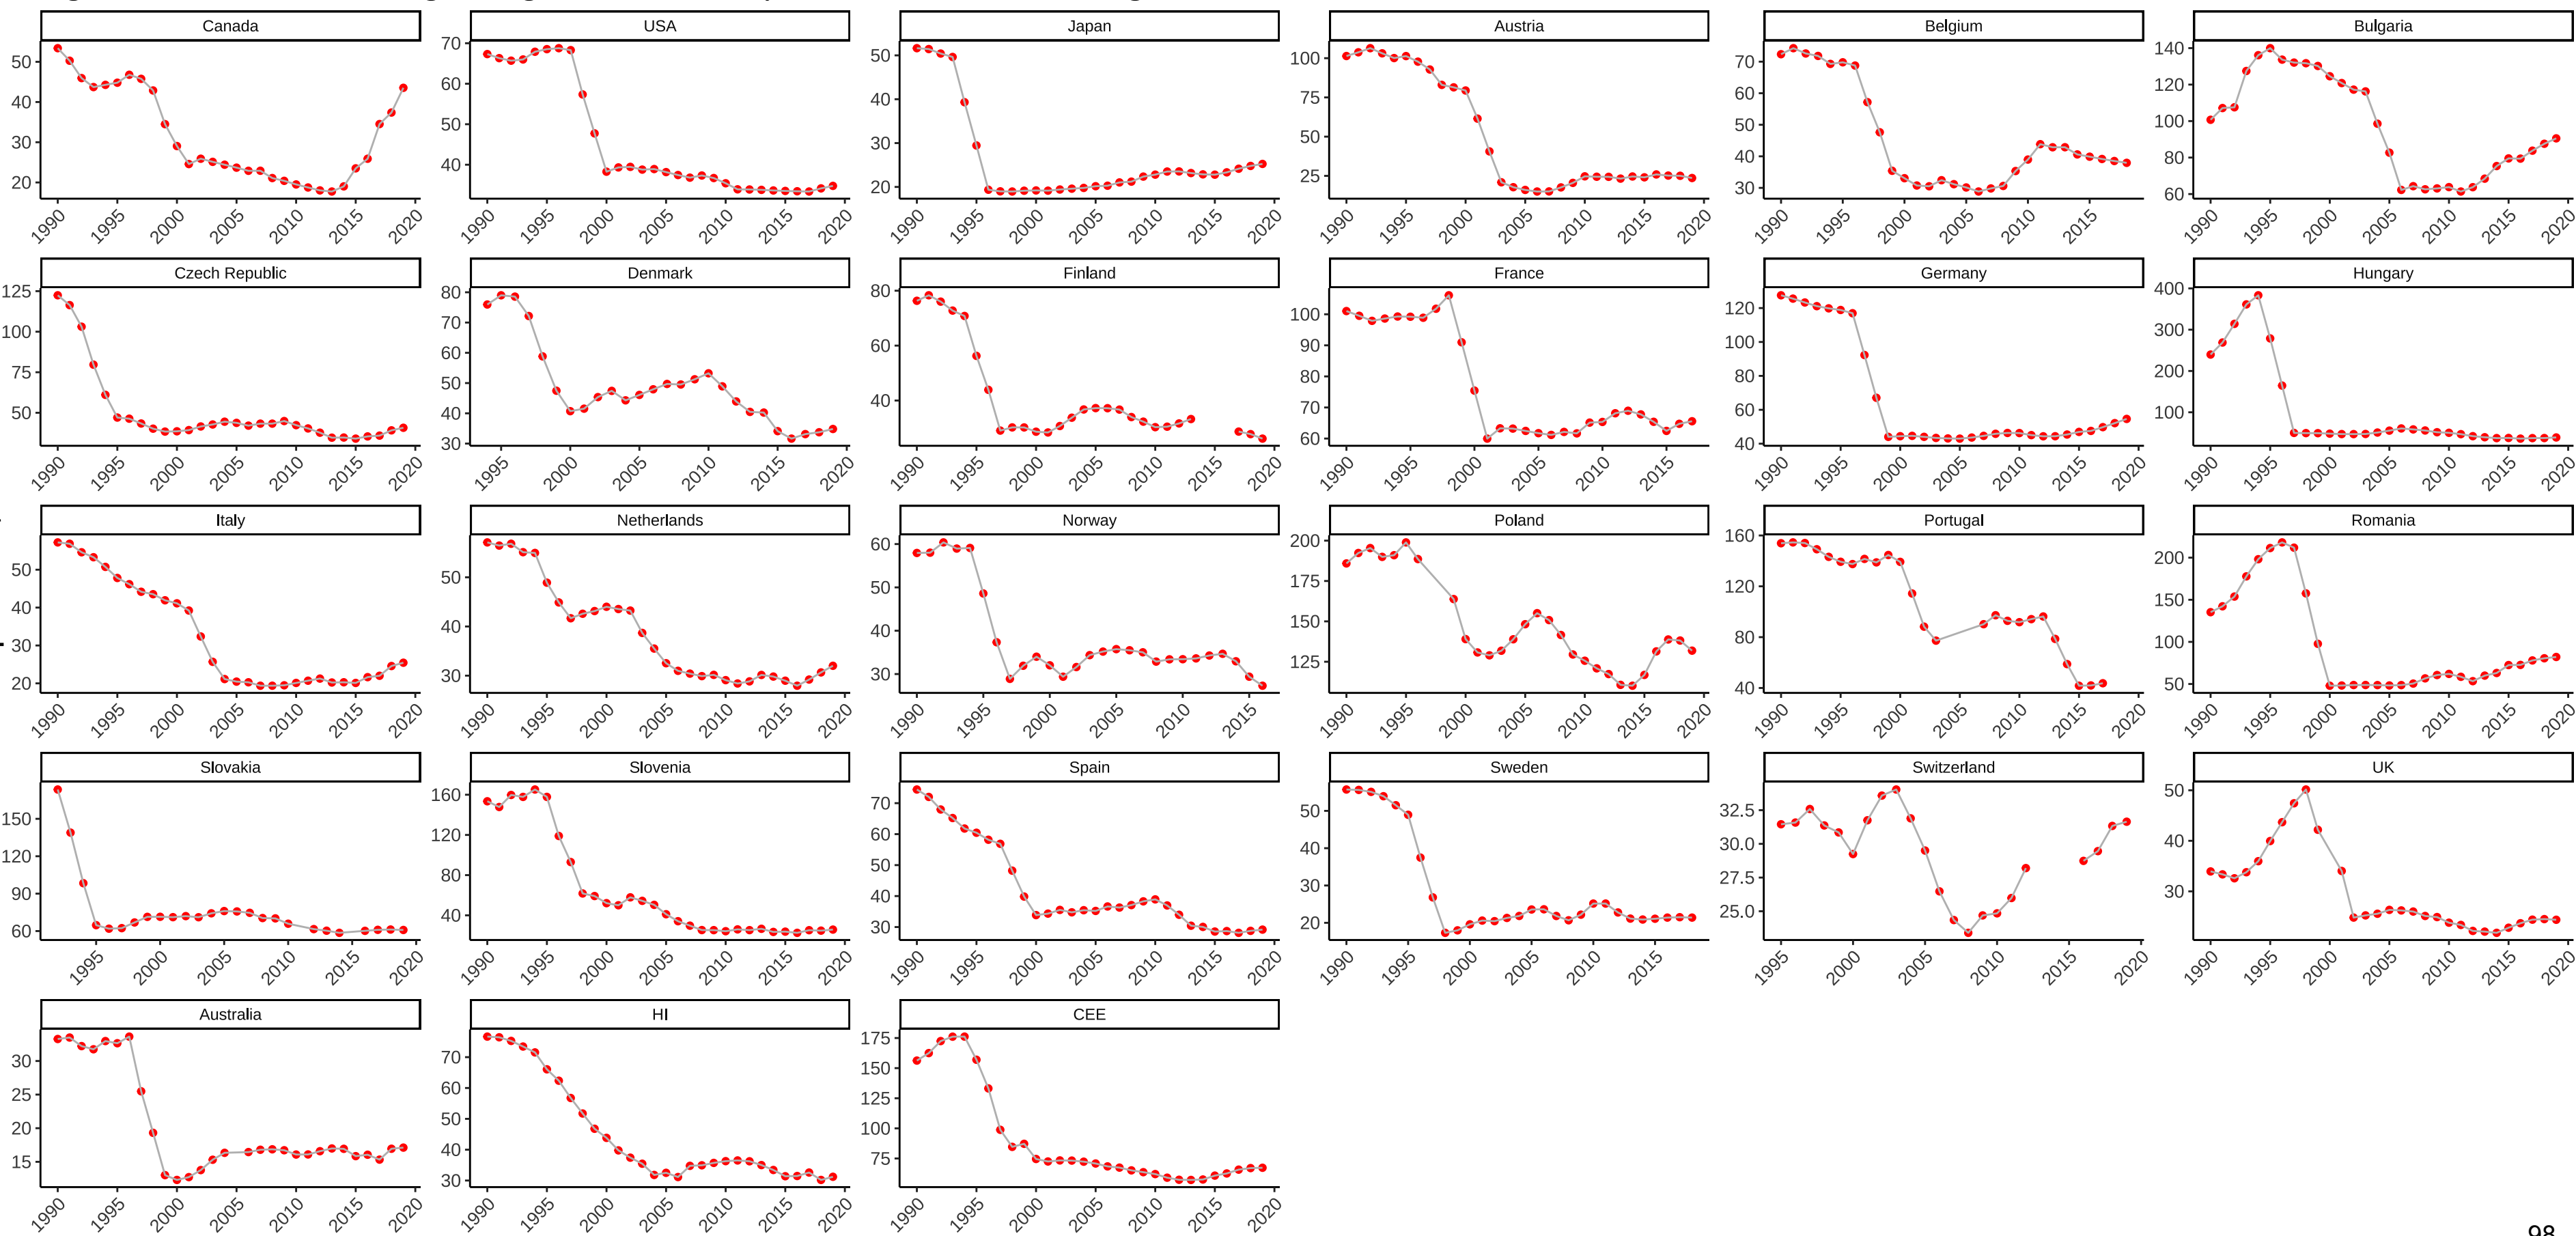

Year

**Figure S92. Three-Year Moving Average of Female Mortality from All Other Causes at Ages 45-54**

Deaths per 100,000

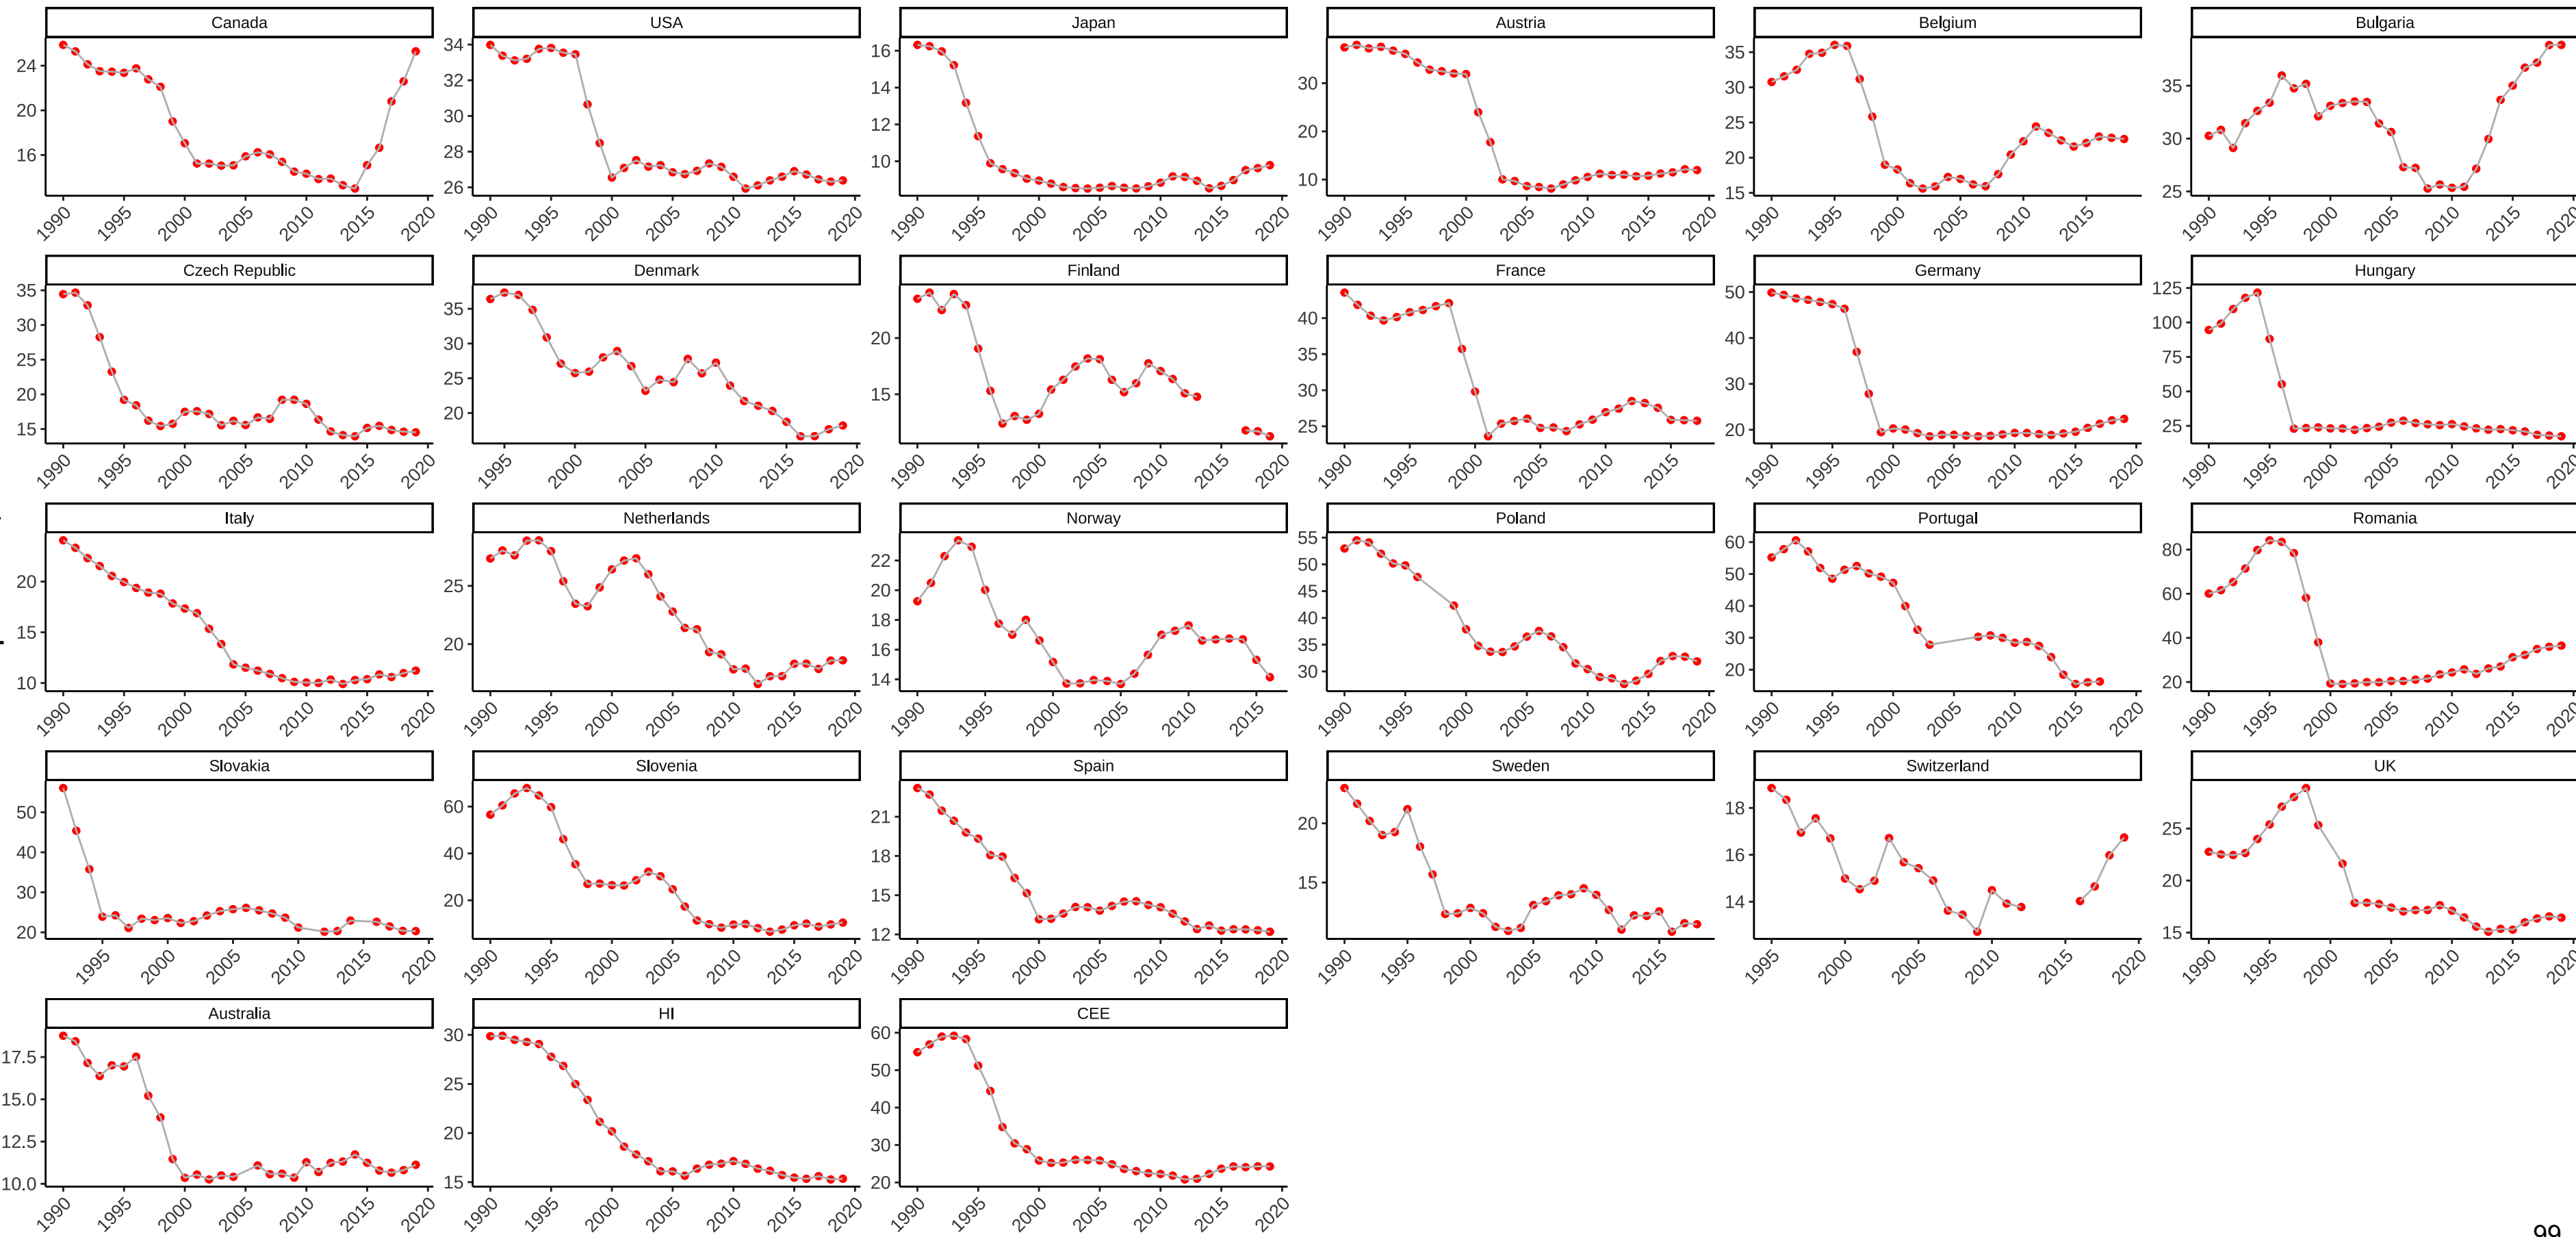

Year

**Figure S93. Three-Year Moving Average of Male Mortality from All Causes at Ages 45-54**

Deaths per 100,000

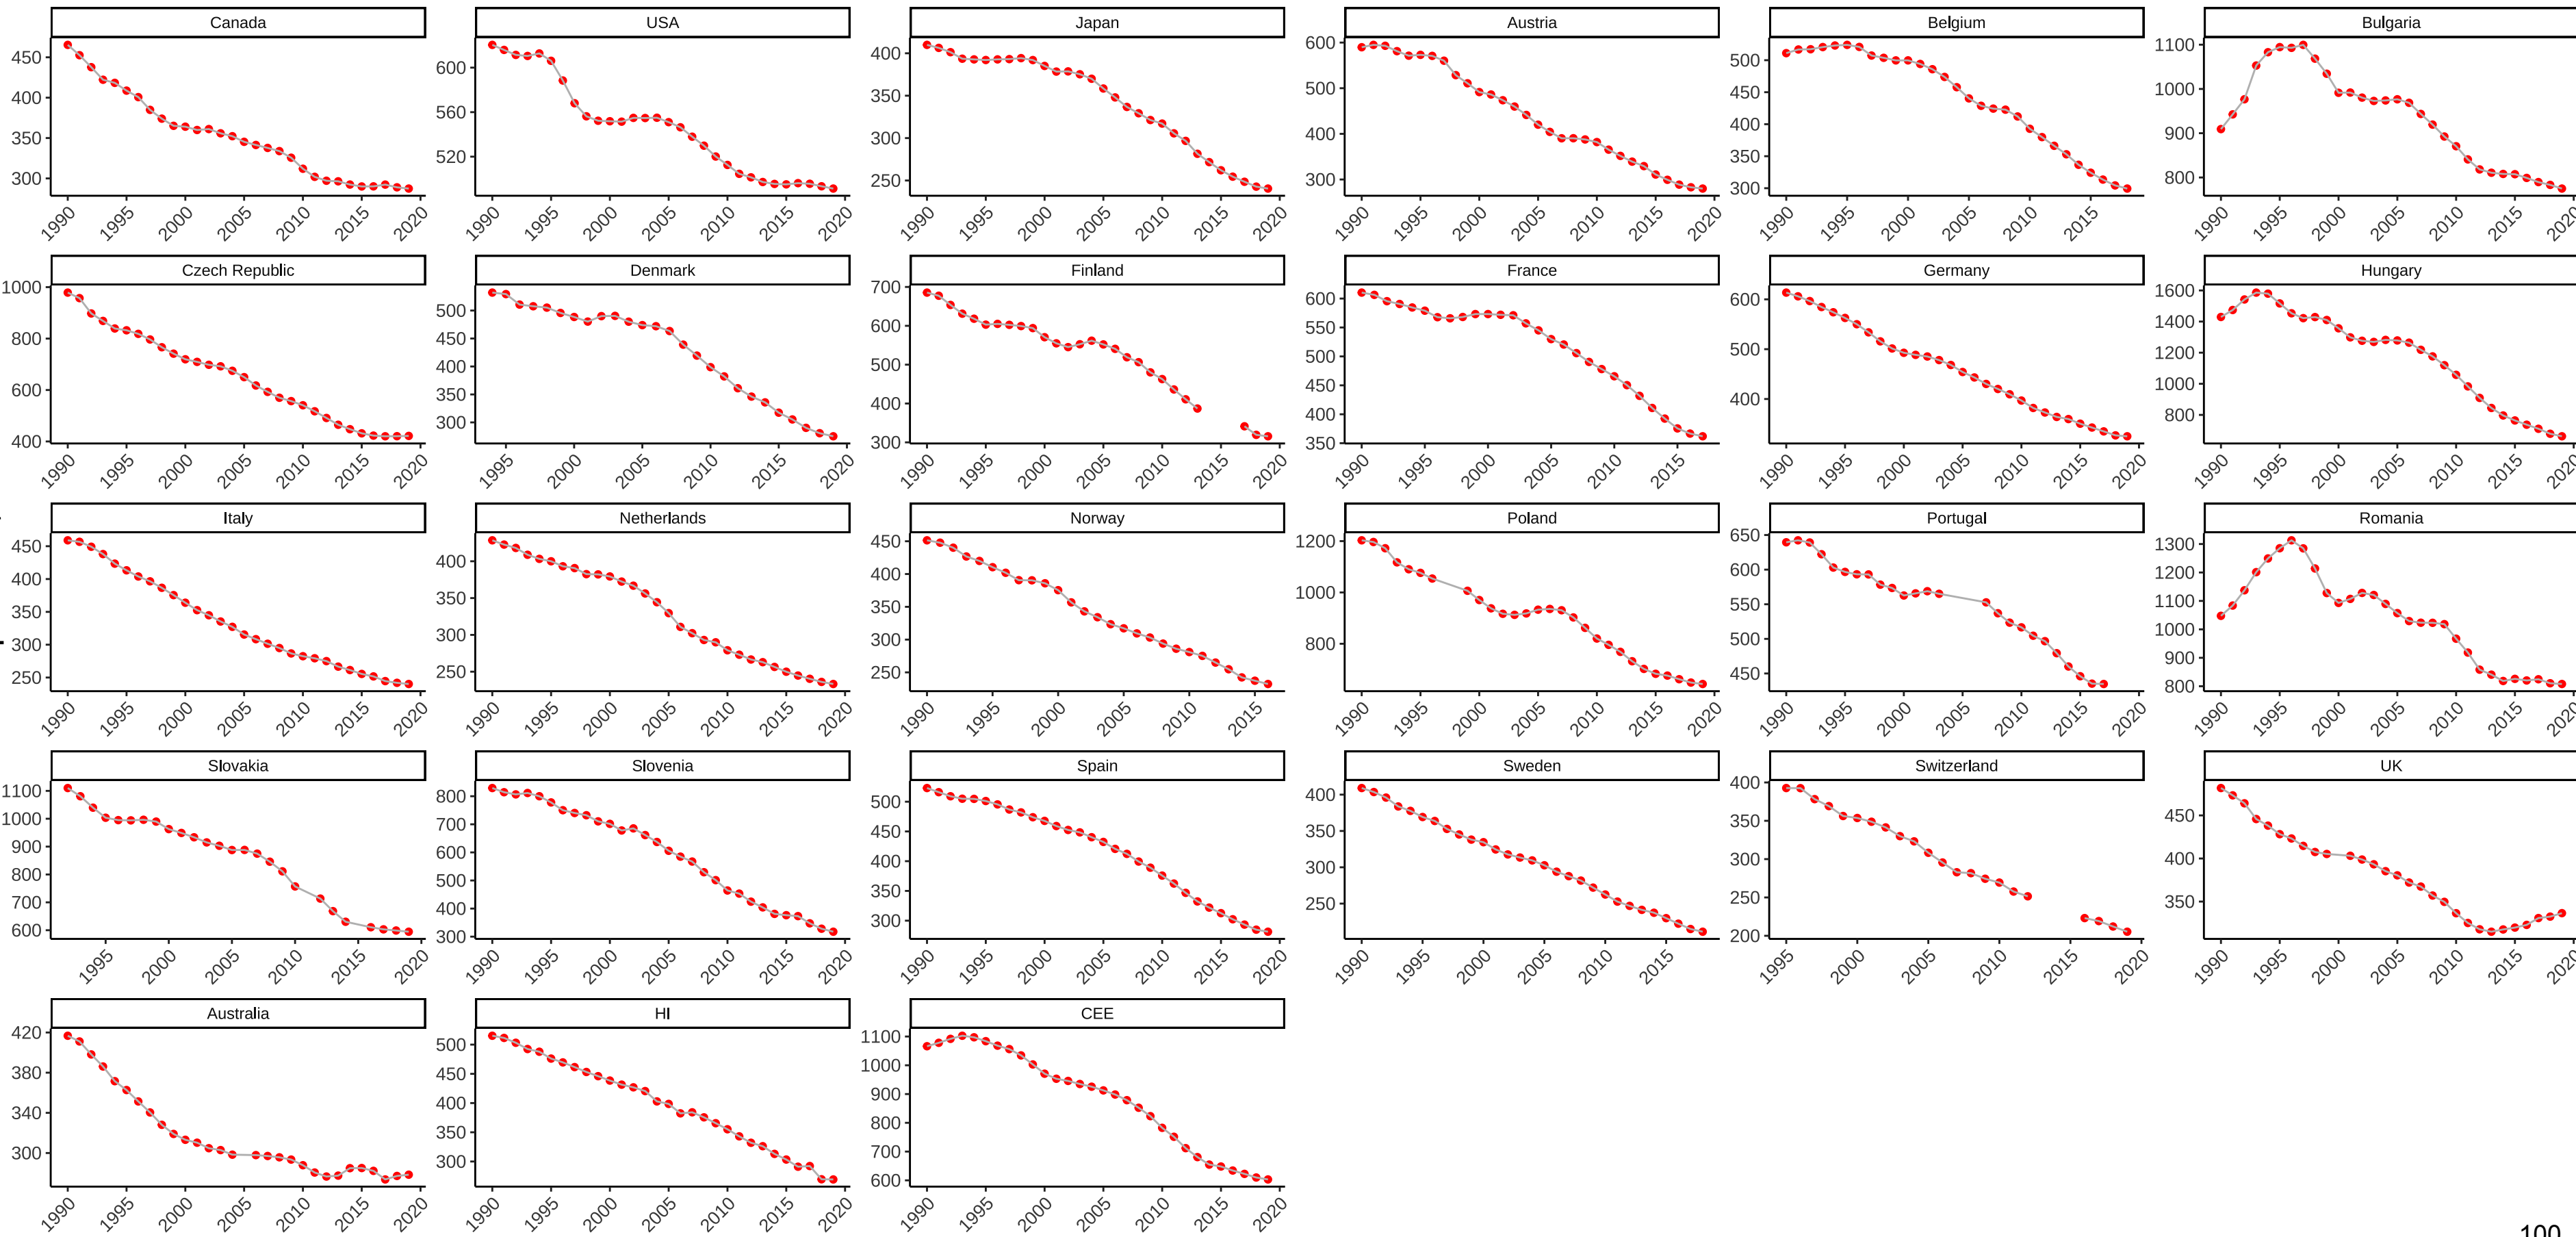

Year

**Figure S94. Three-Year Moving Average of Female Mortality from All Causes at Ages 45-54**

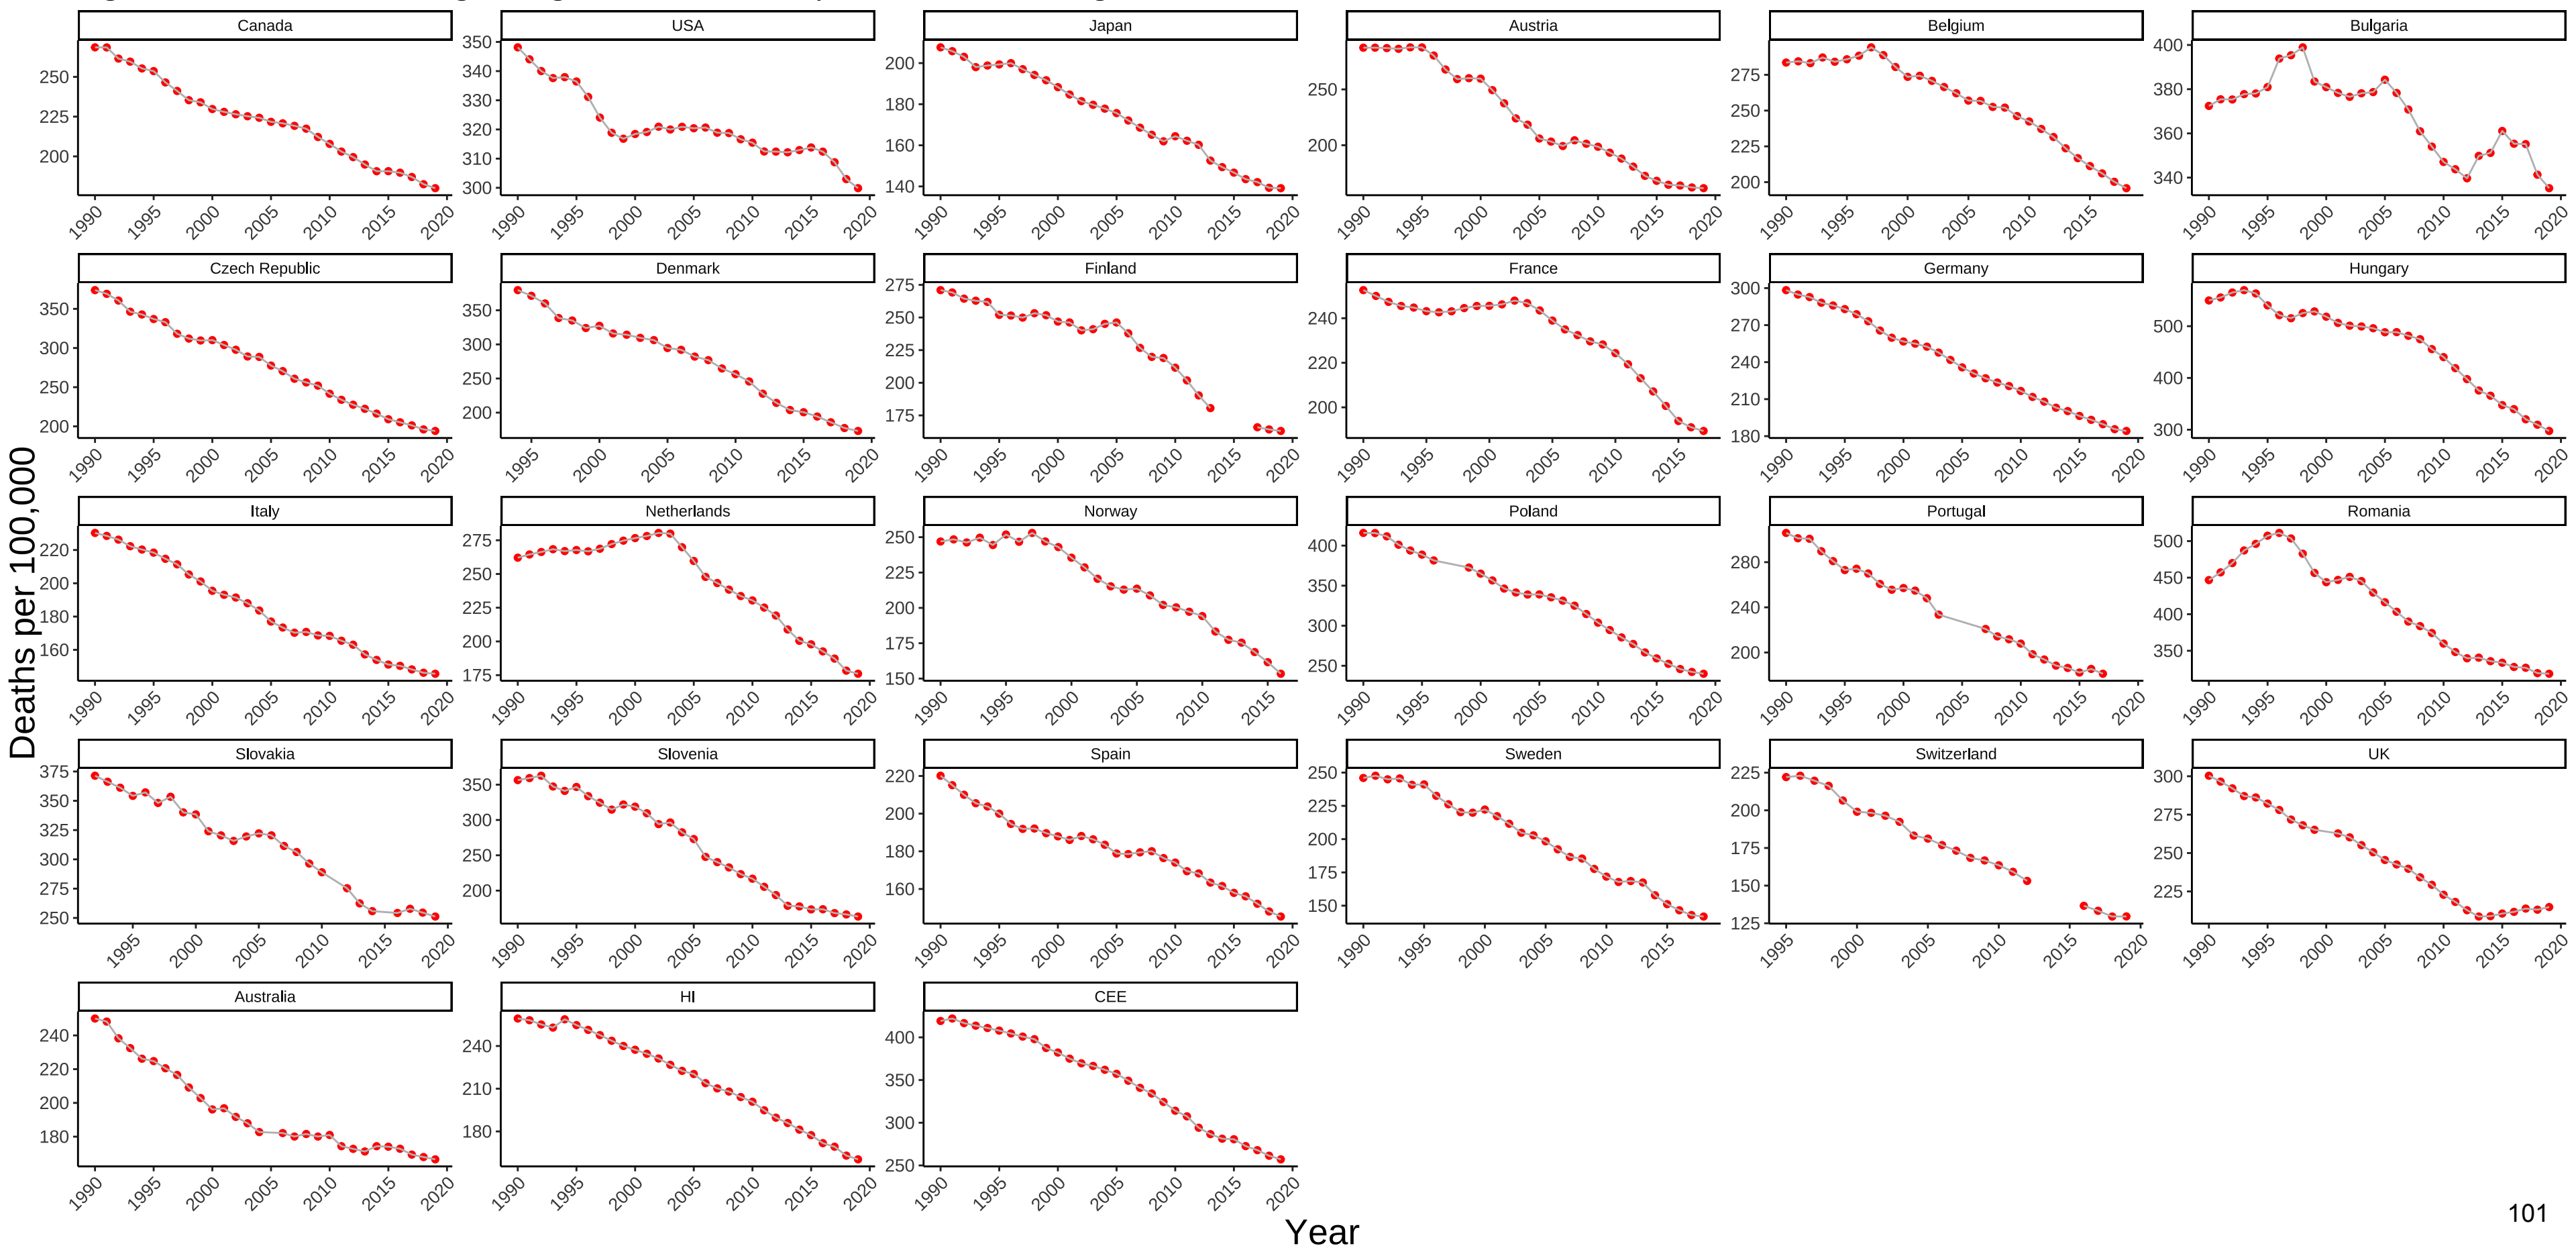

**Figure S95. Three-Year Moving Average of Male Mortality from Infectious and Parasitic Diseases at Ages 55-64**

Deaths per 100,000

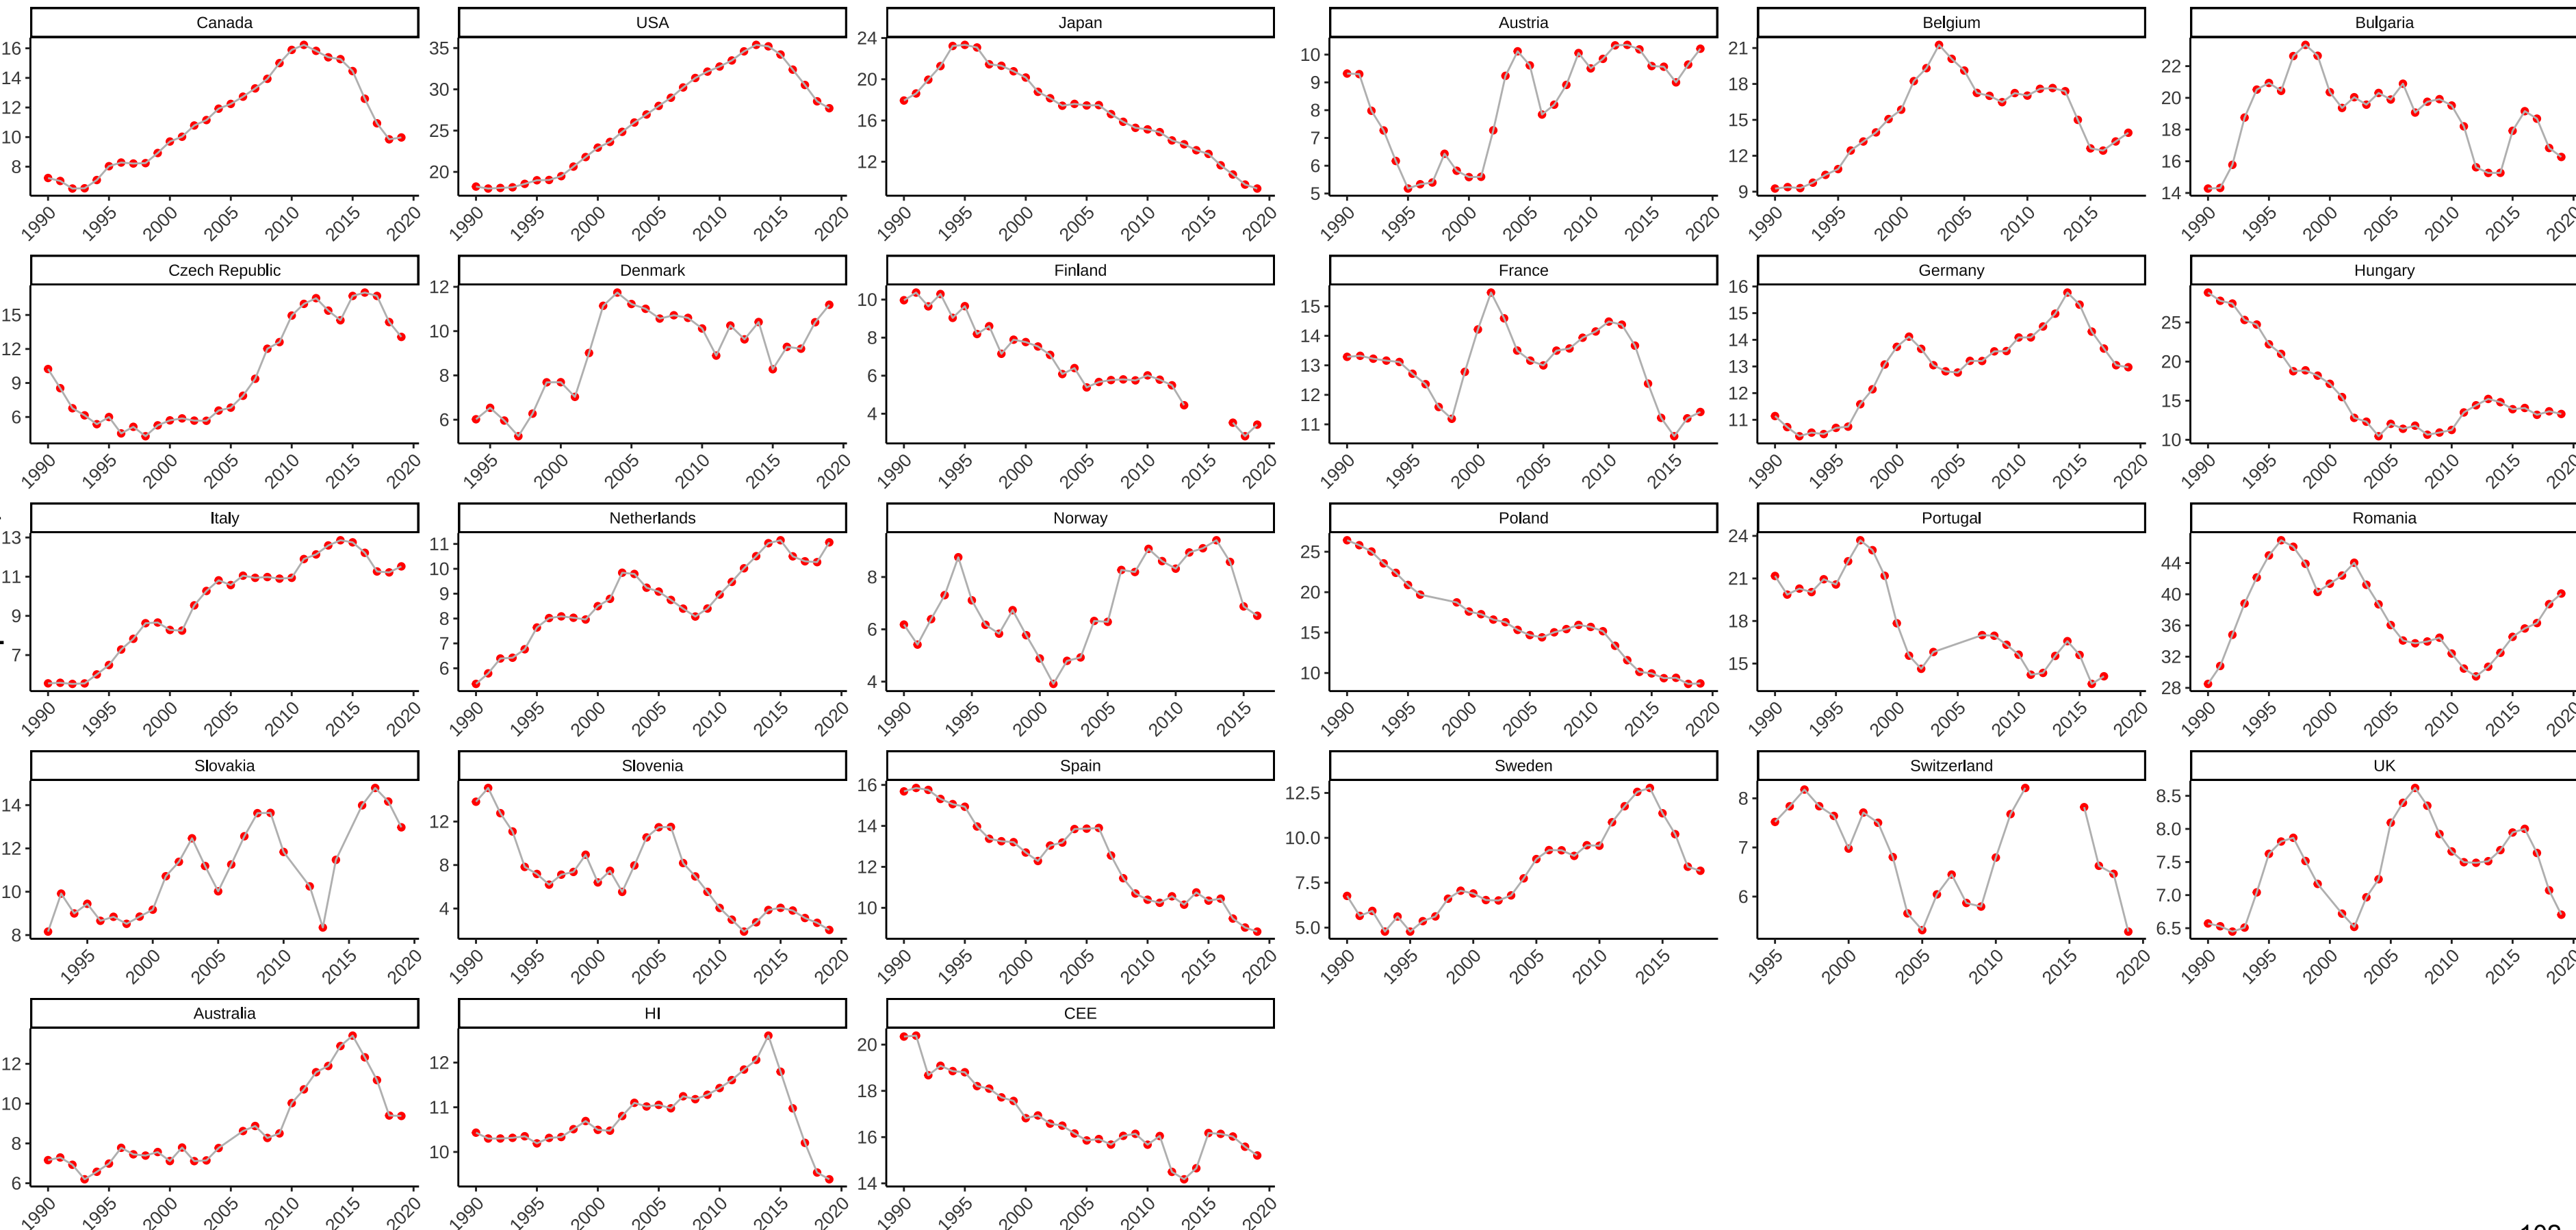

Year

**Figure S96. Three-Year Moving Average of Female Mortality from Infectious and Parasitic Diseases at Ages 55-64**

Deaths per 100,000

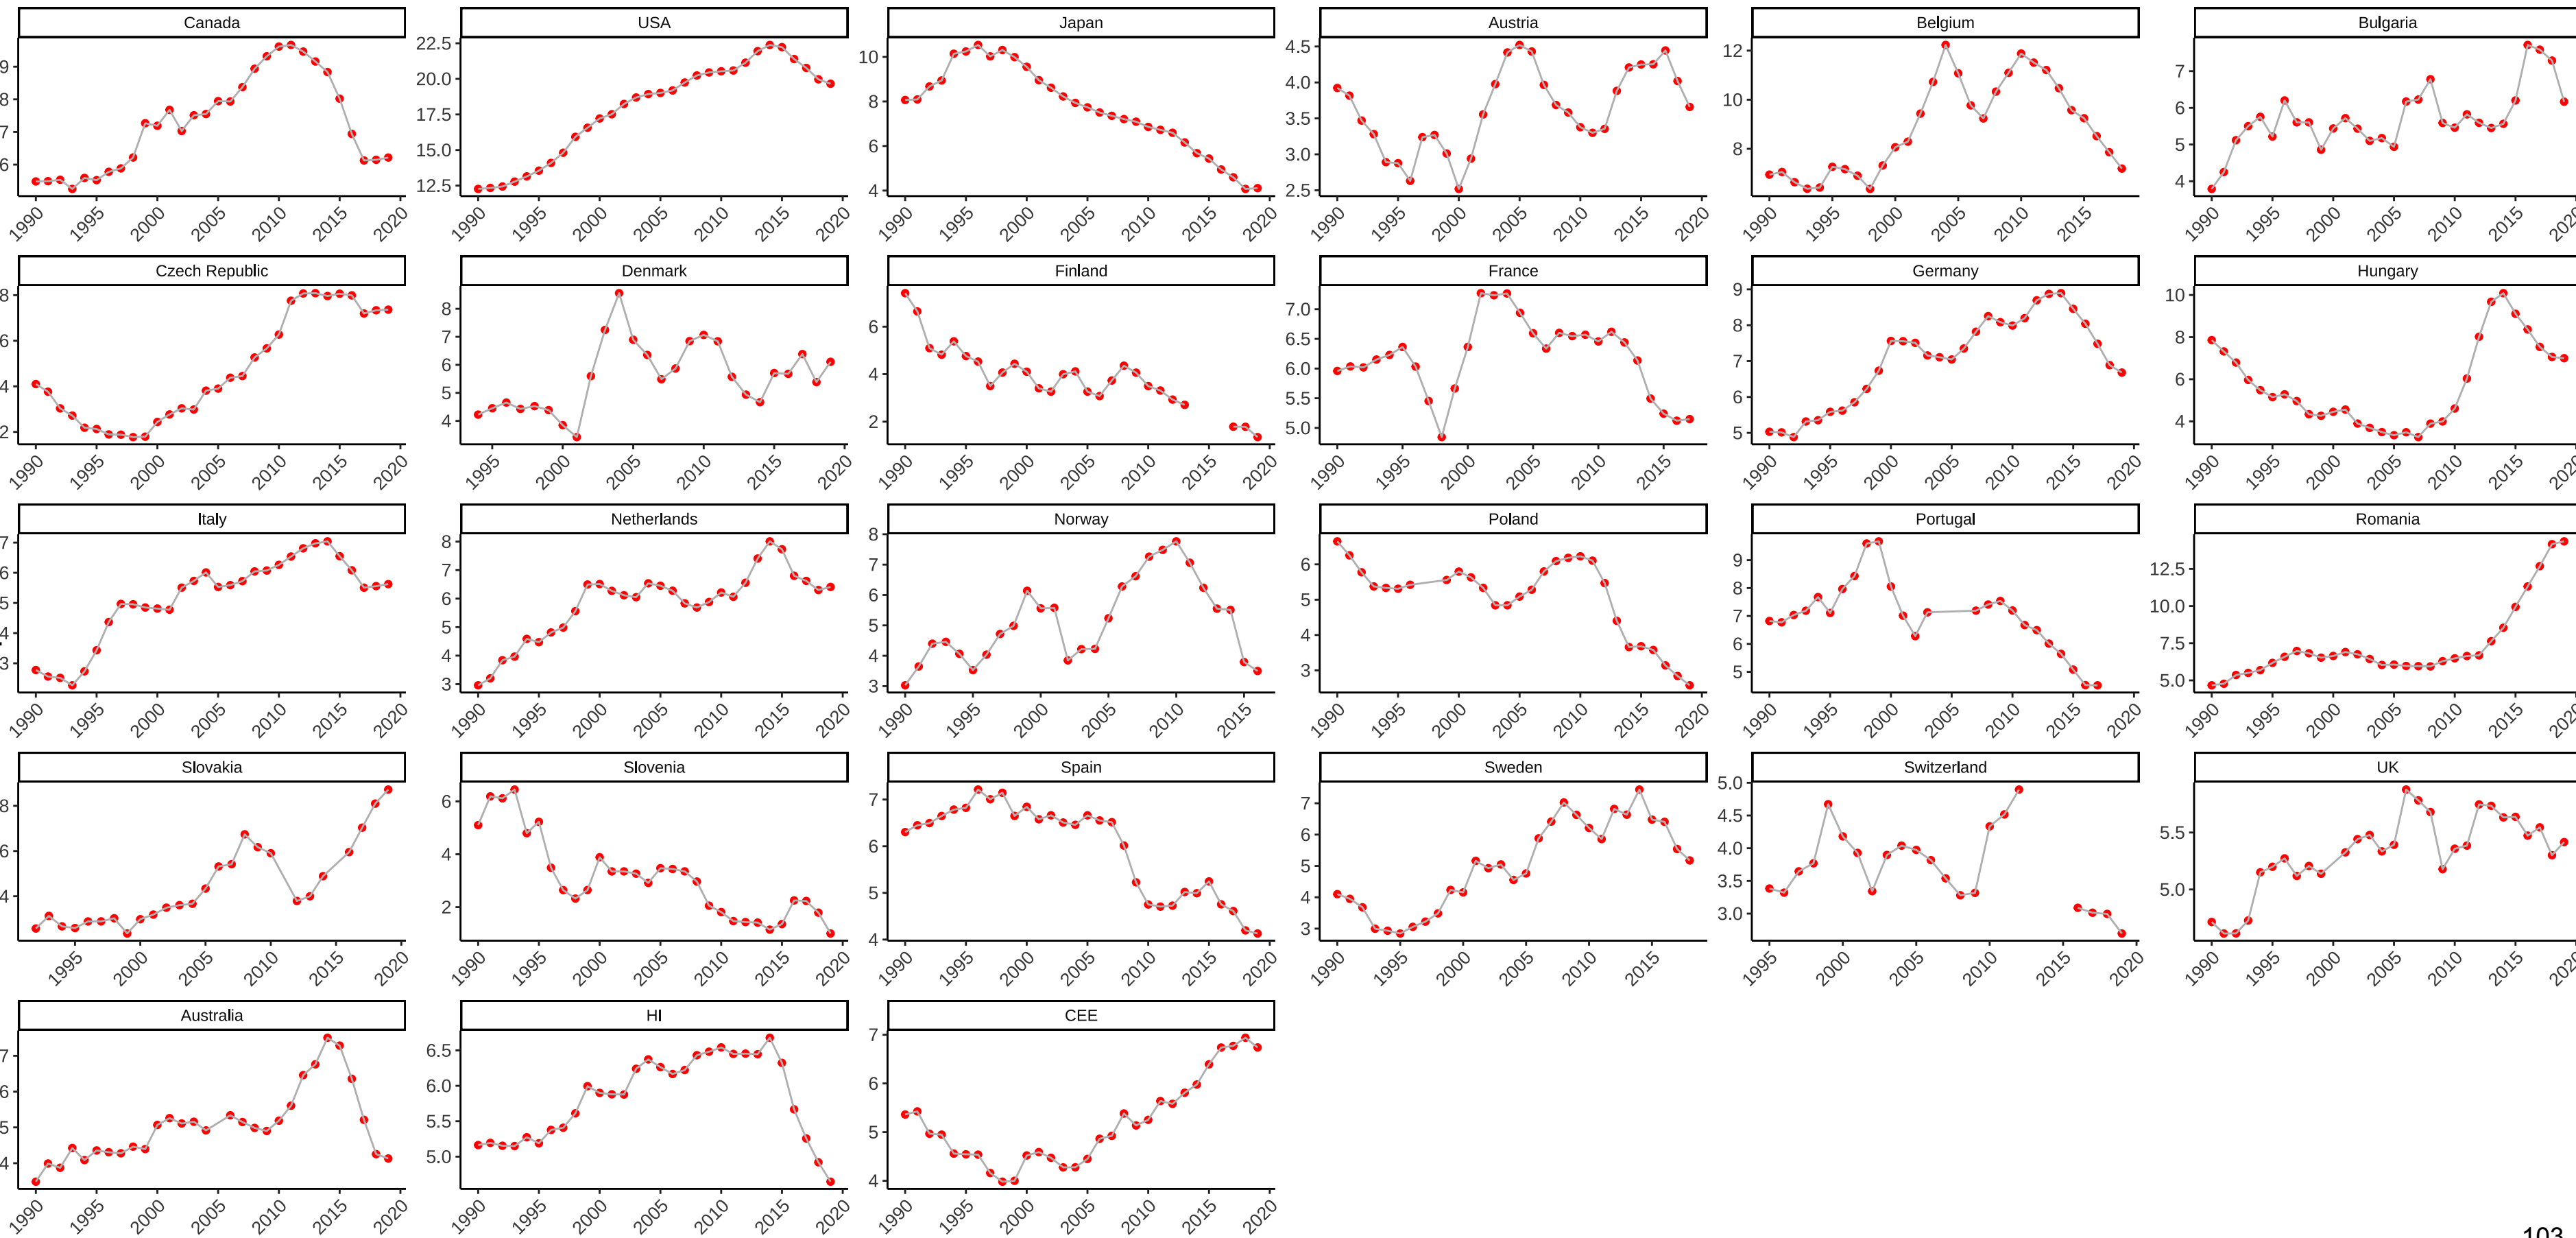

Year

**Figure S97. Three-Year Moving Average of Male Mortality from HIV/AIDS at Ages 55-64**

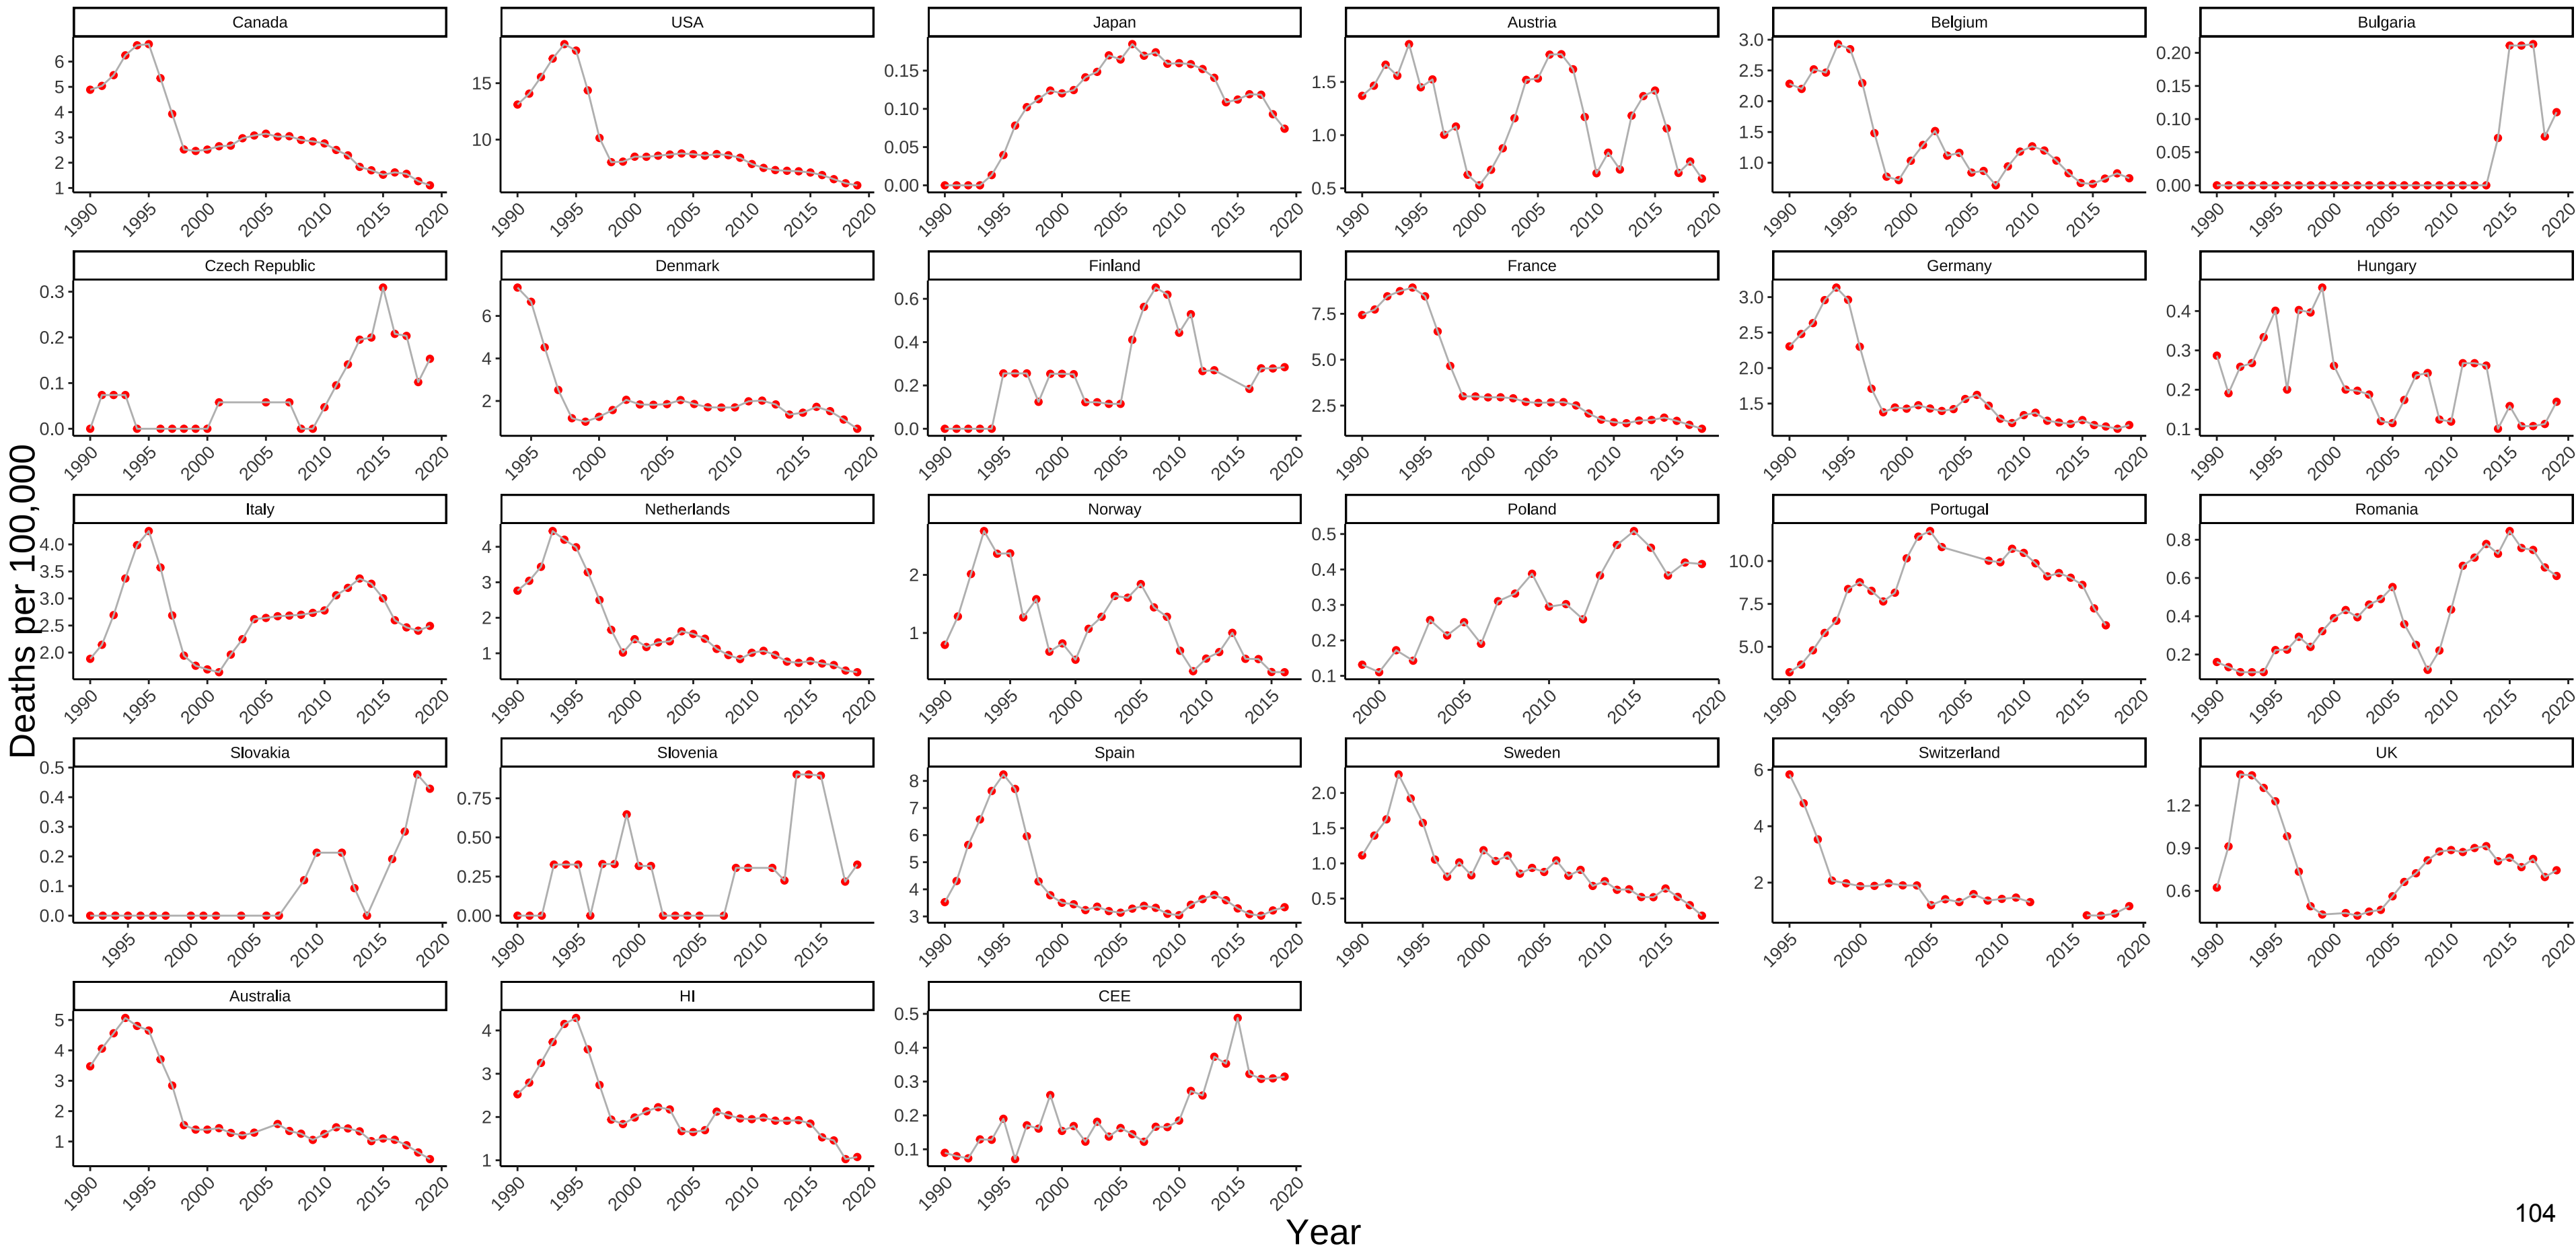

**Figure S98. Three-Year Moving Average of Female Mortality from HIV/AIDS at Ages 55-64**

Deaths per 100,000

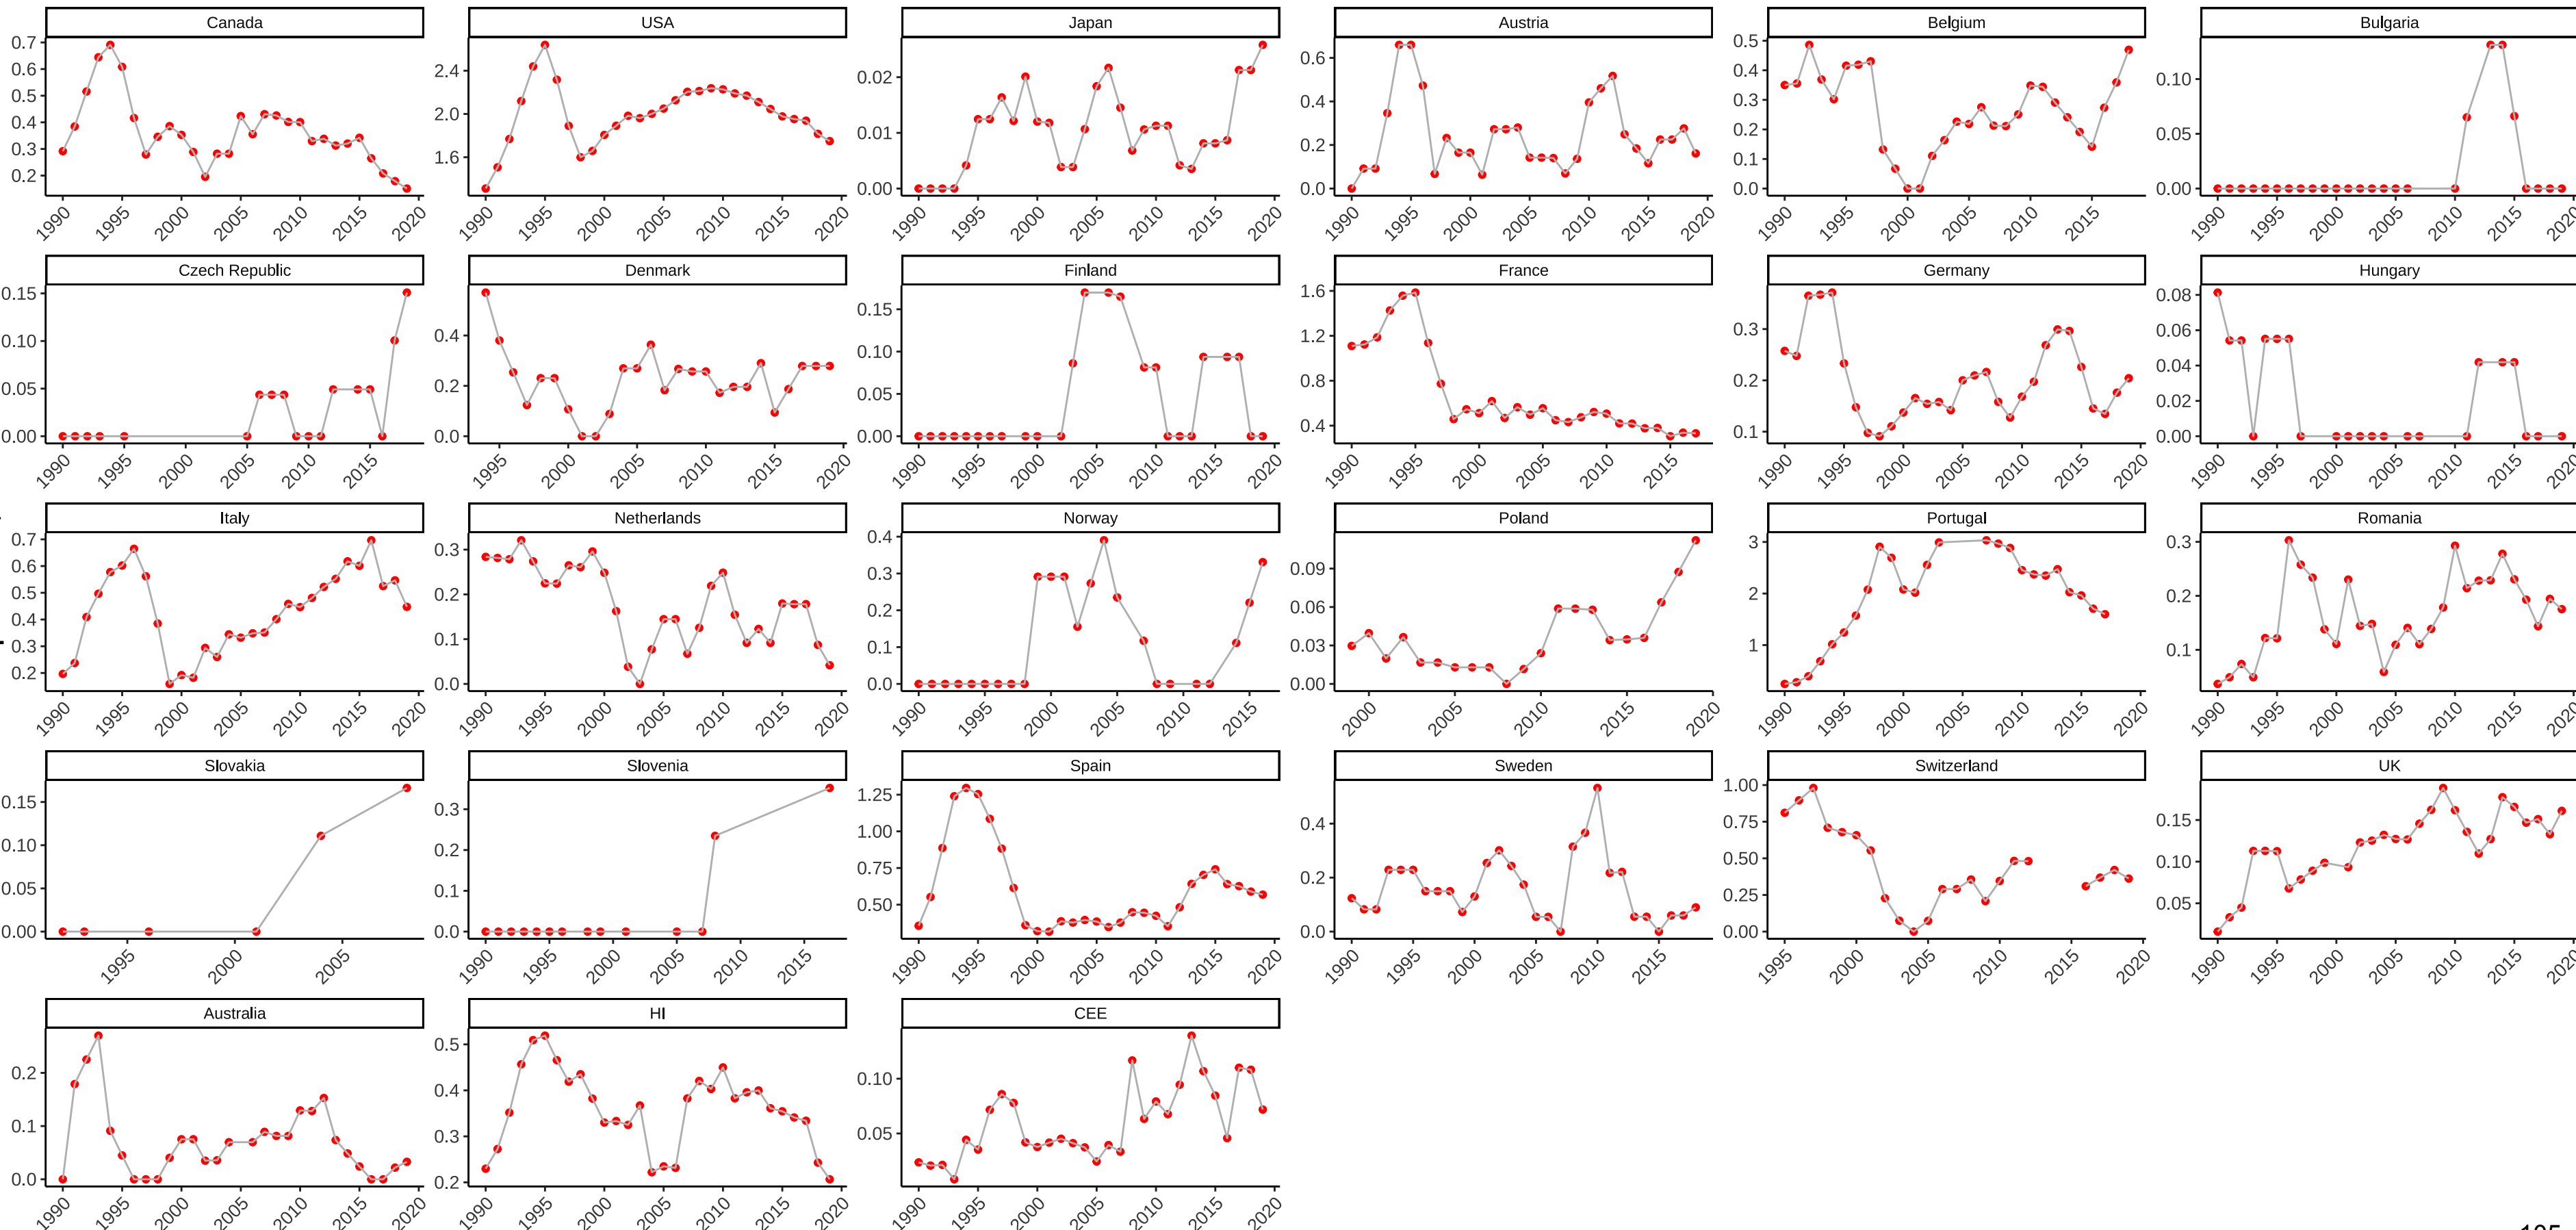

Year

**Figure S99. Three-Year Moving Average of Male Mortality from Respiratory Diseases at Ages 55-64**

Deaths per 100,000

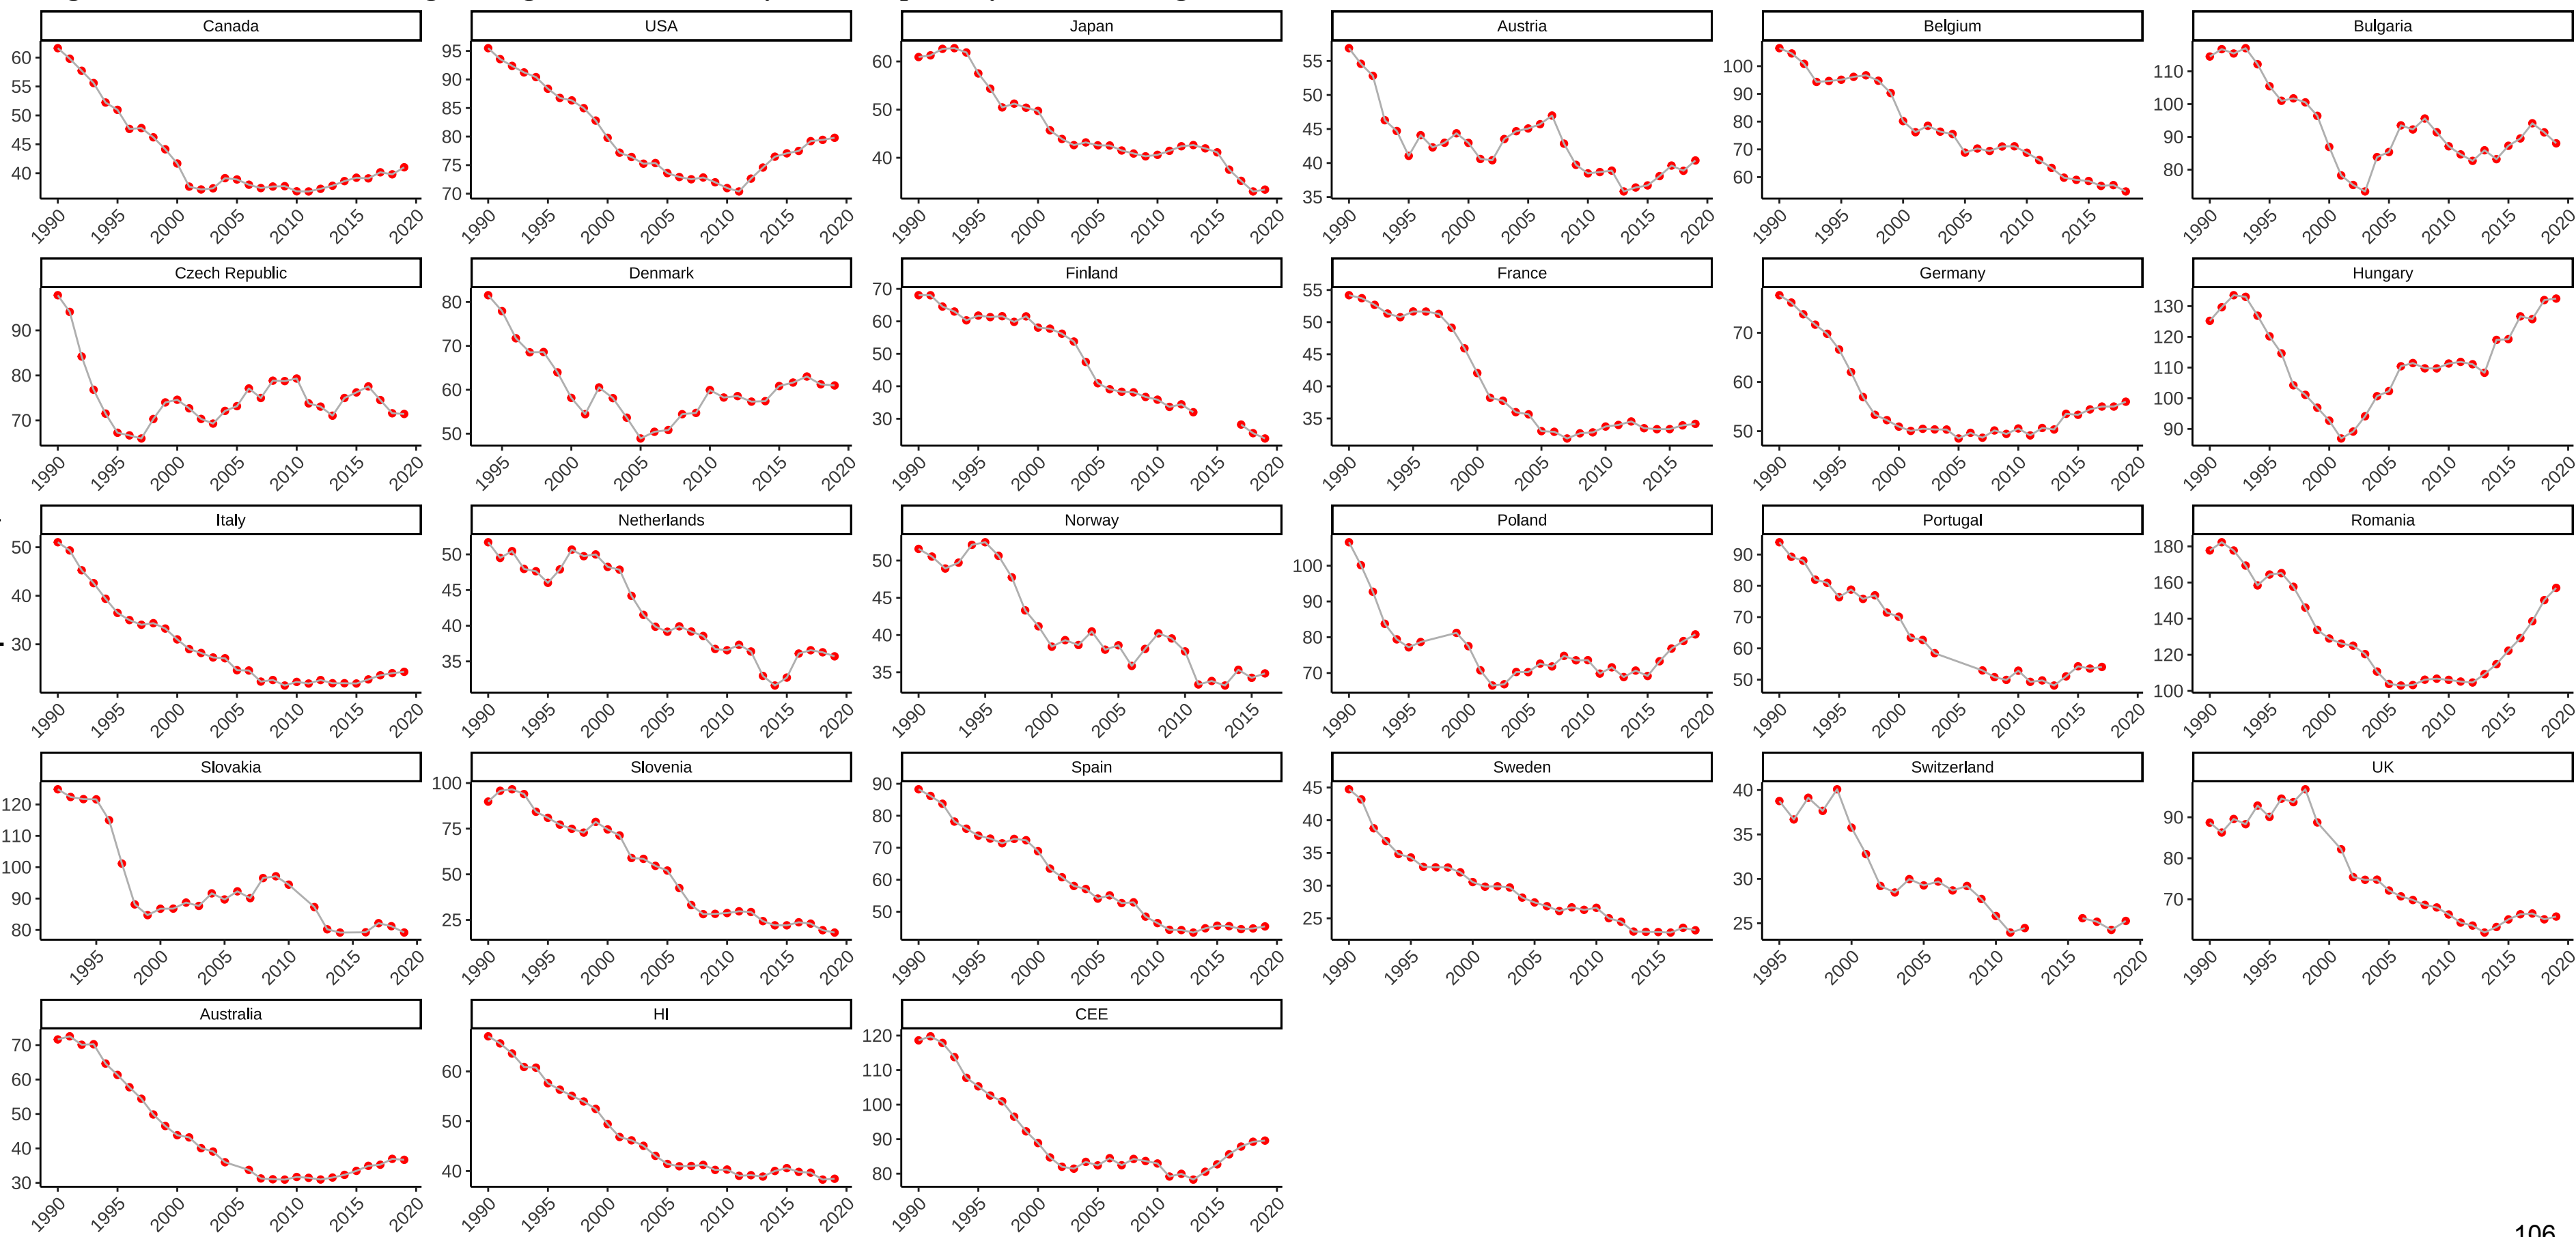

Year

**Figure S100. Three-Year Moving Average of Female Mortality from Respiratory Diseases at Ages 55-64**

Deaths per 100,000

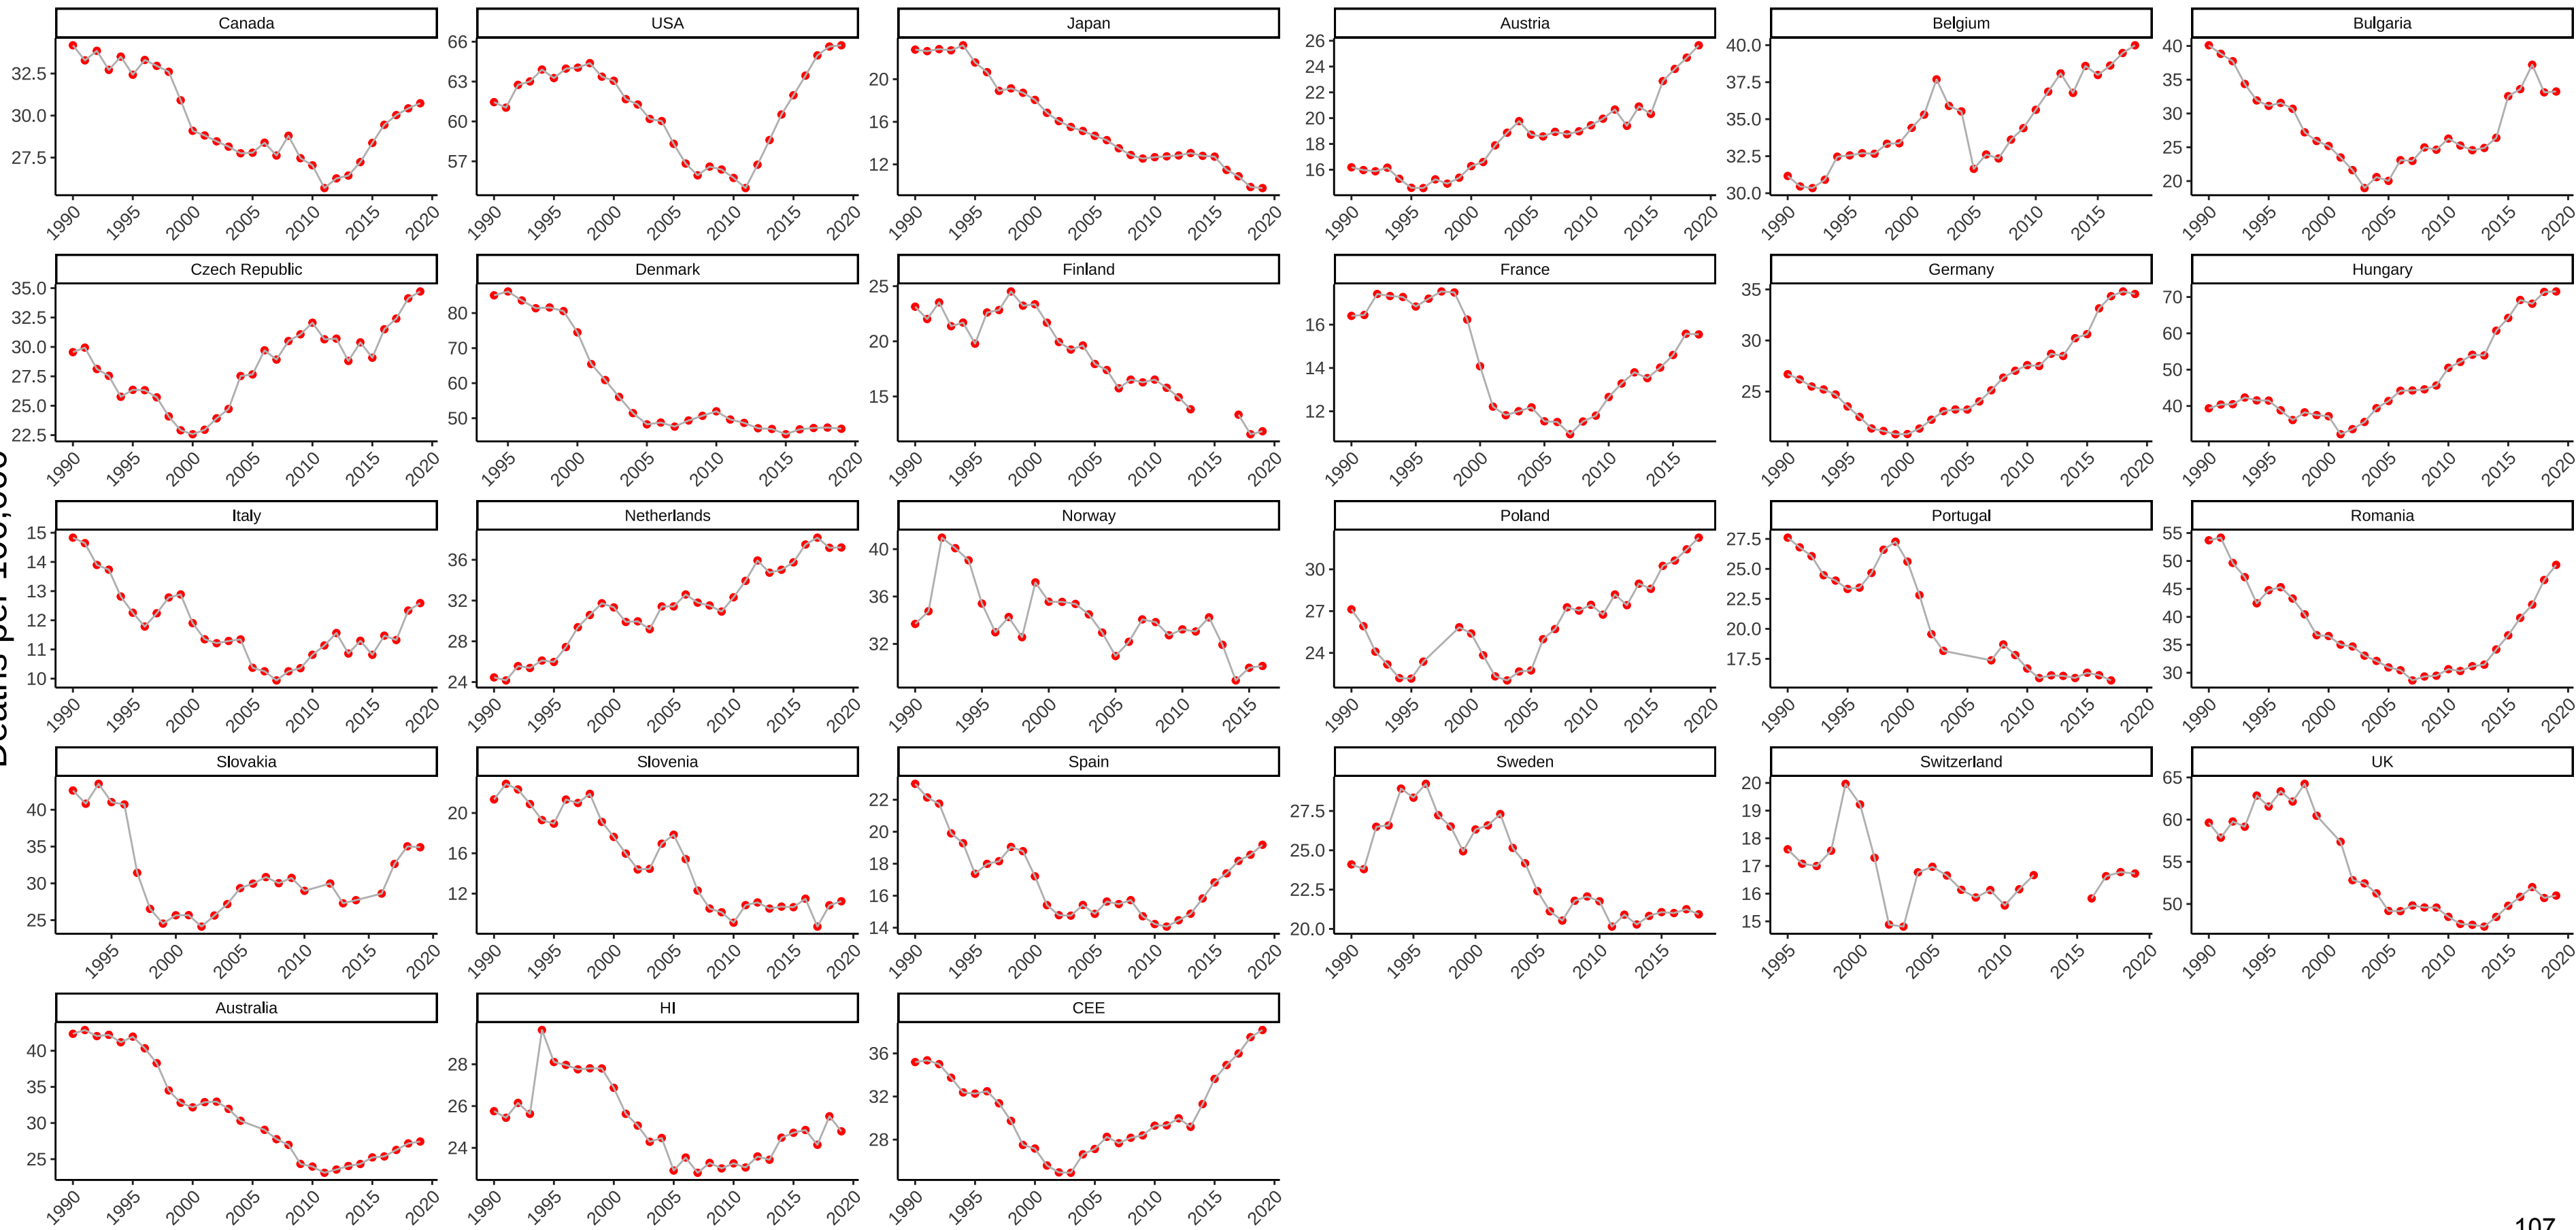

Year

**Figure S101. Three-Year Moving Average of Male Mortality from Trachea/Bronchus, Lung Cancers at Ages 55-64**

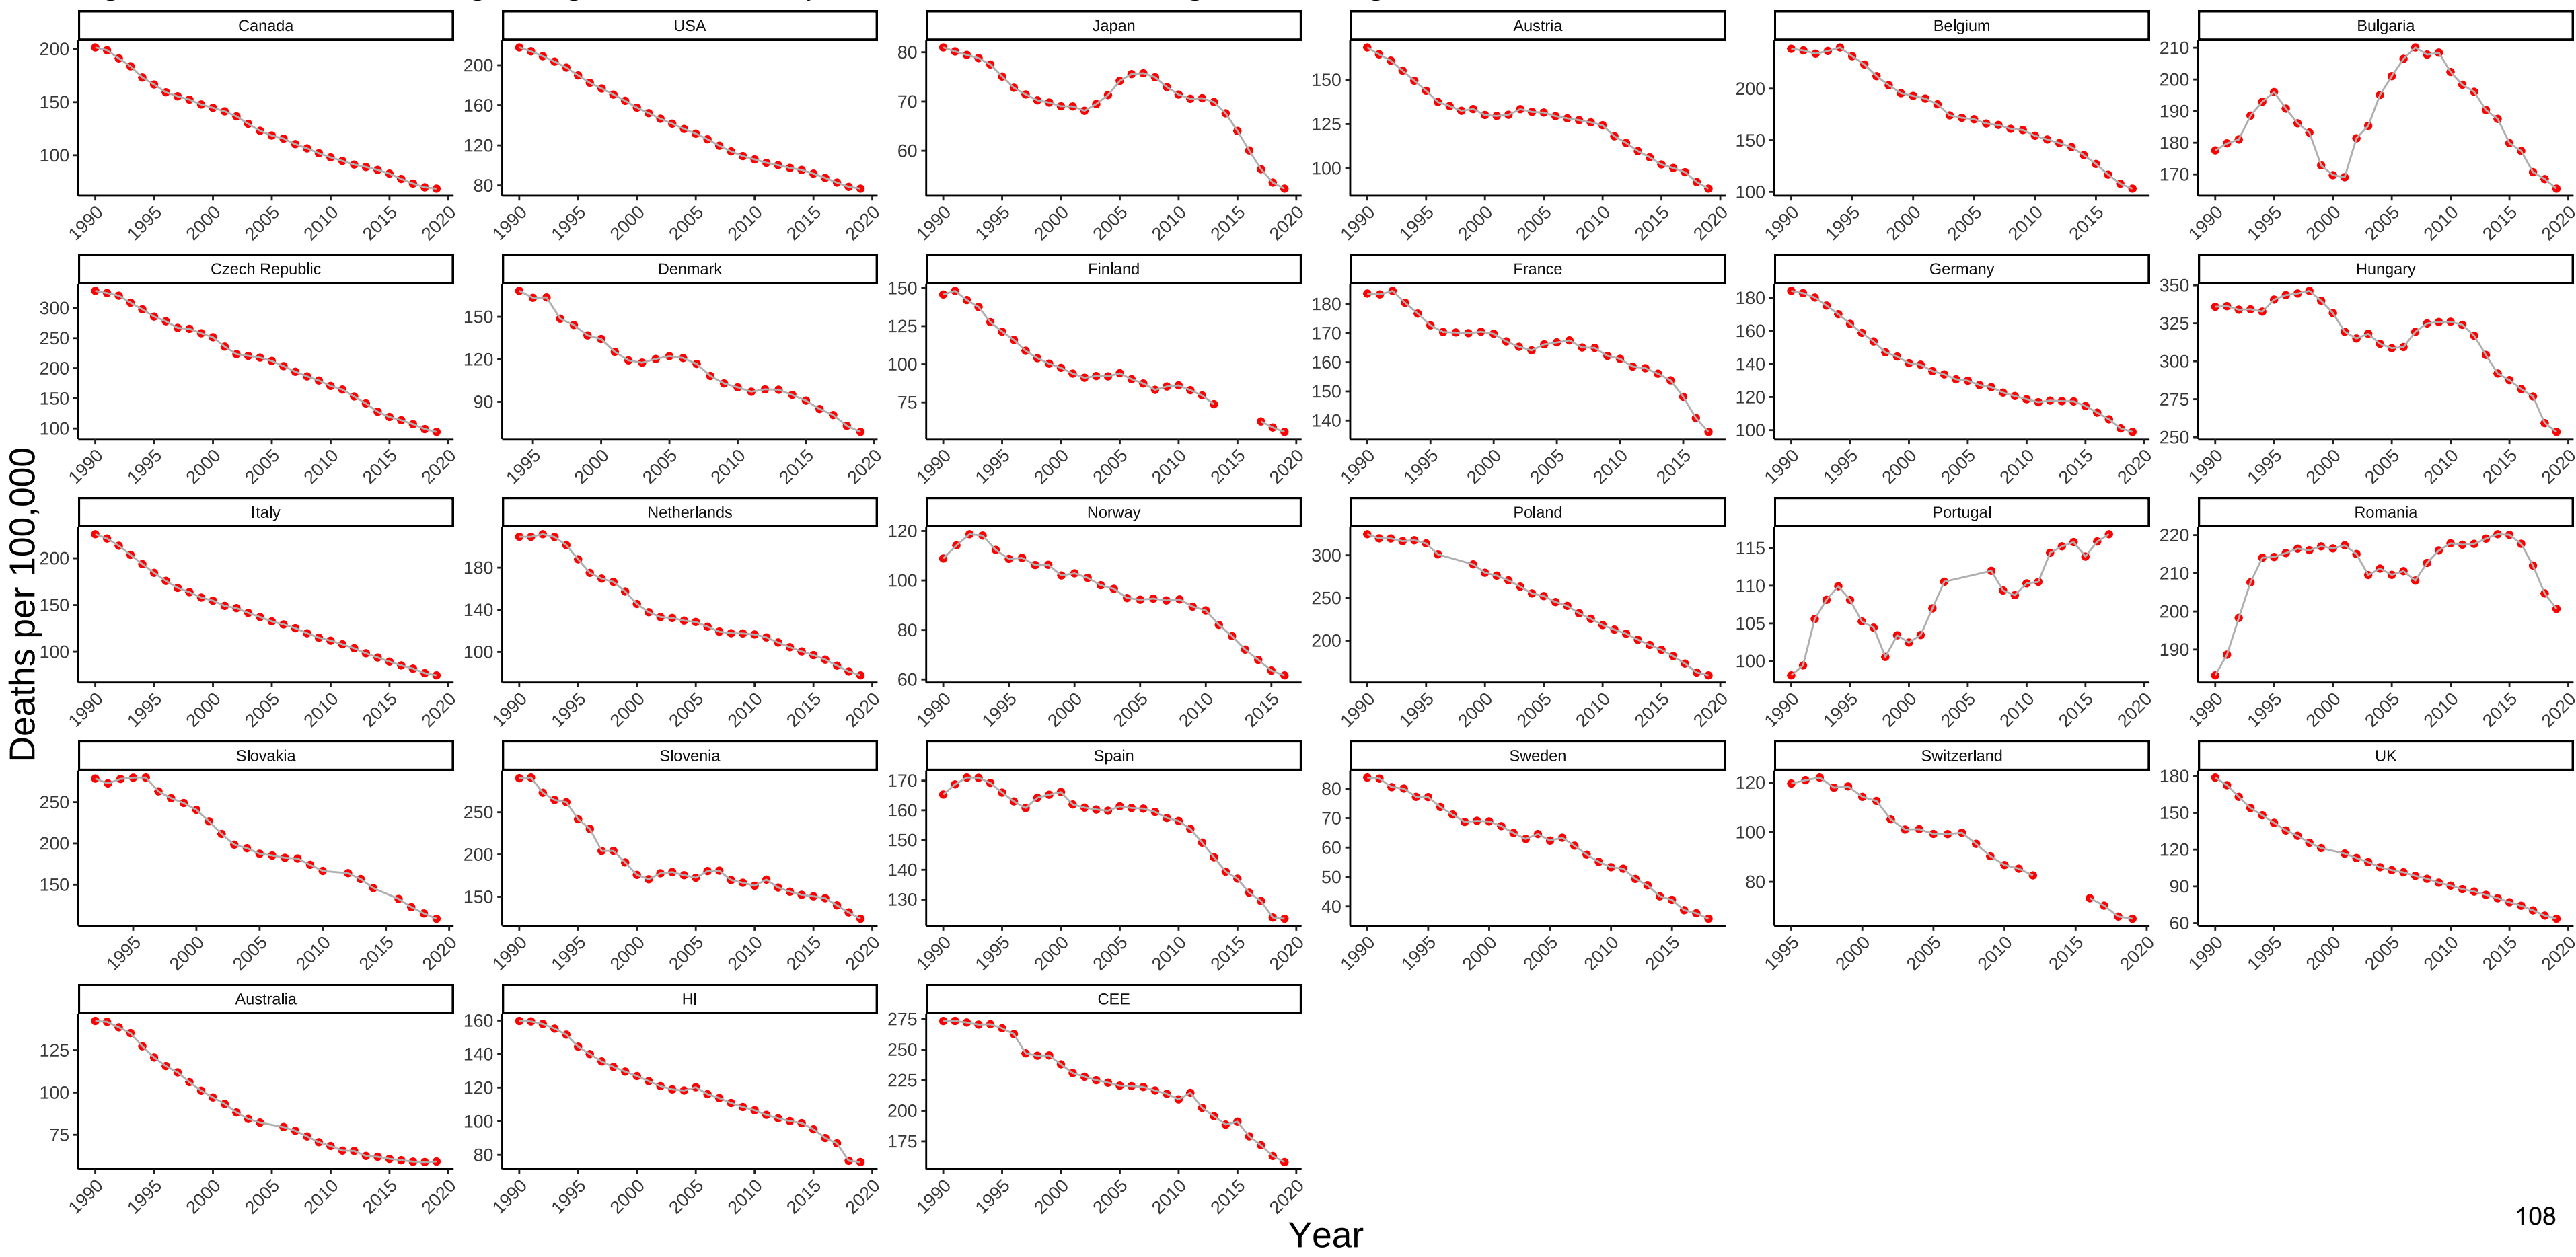

**Figure S102. Three-Year Moving Average of Female Mortality from Trachea/Bronchus, Lung Cancers at Ages 55-64**

Deaths per 100,000

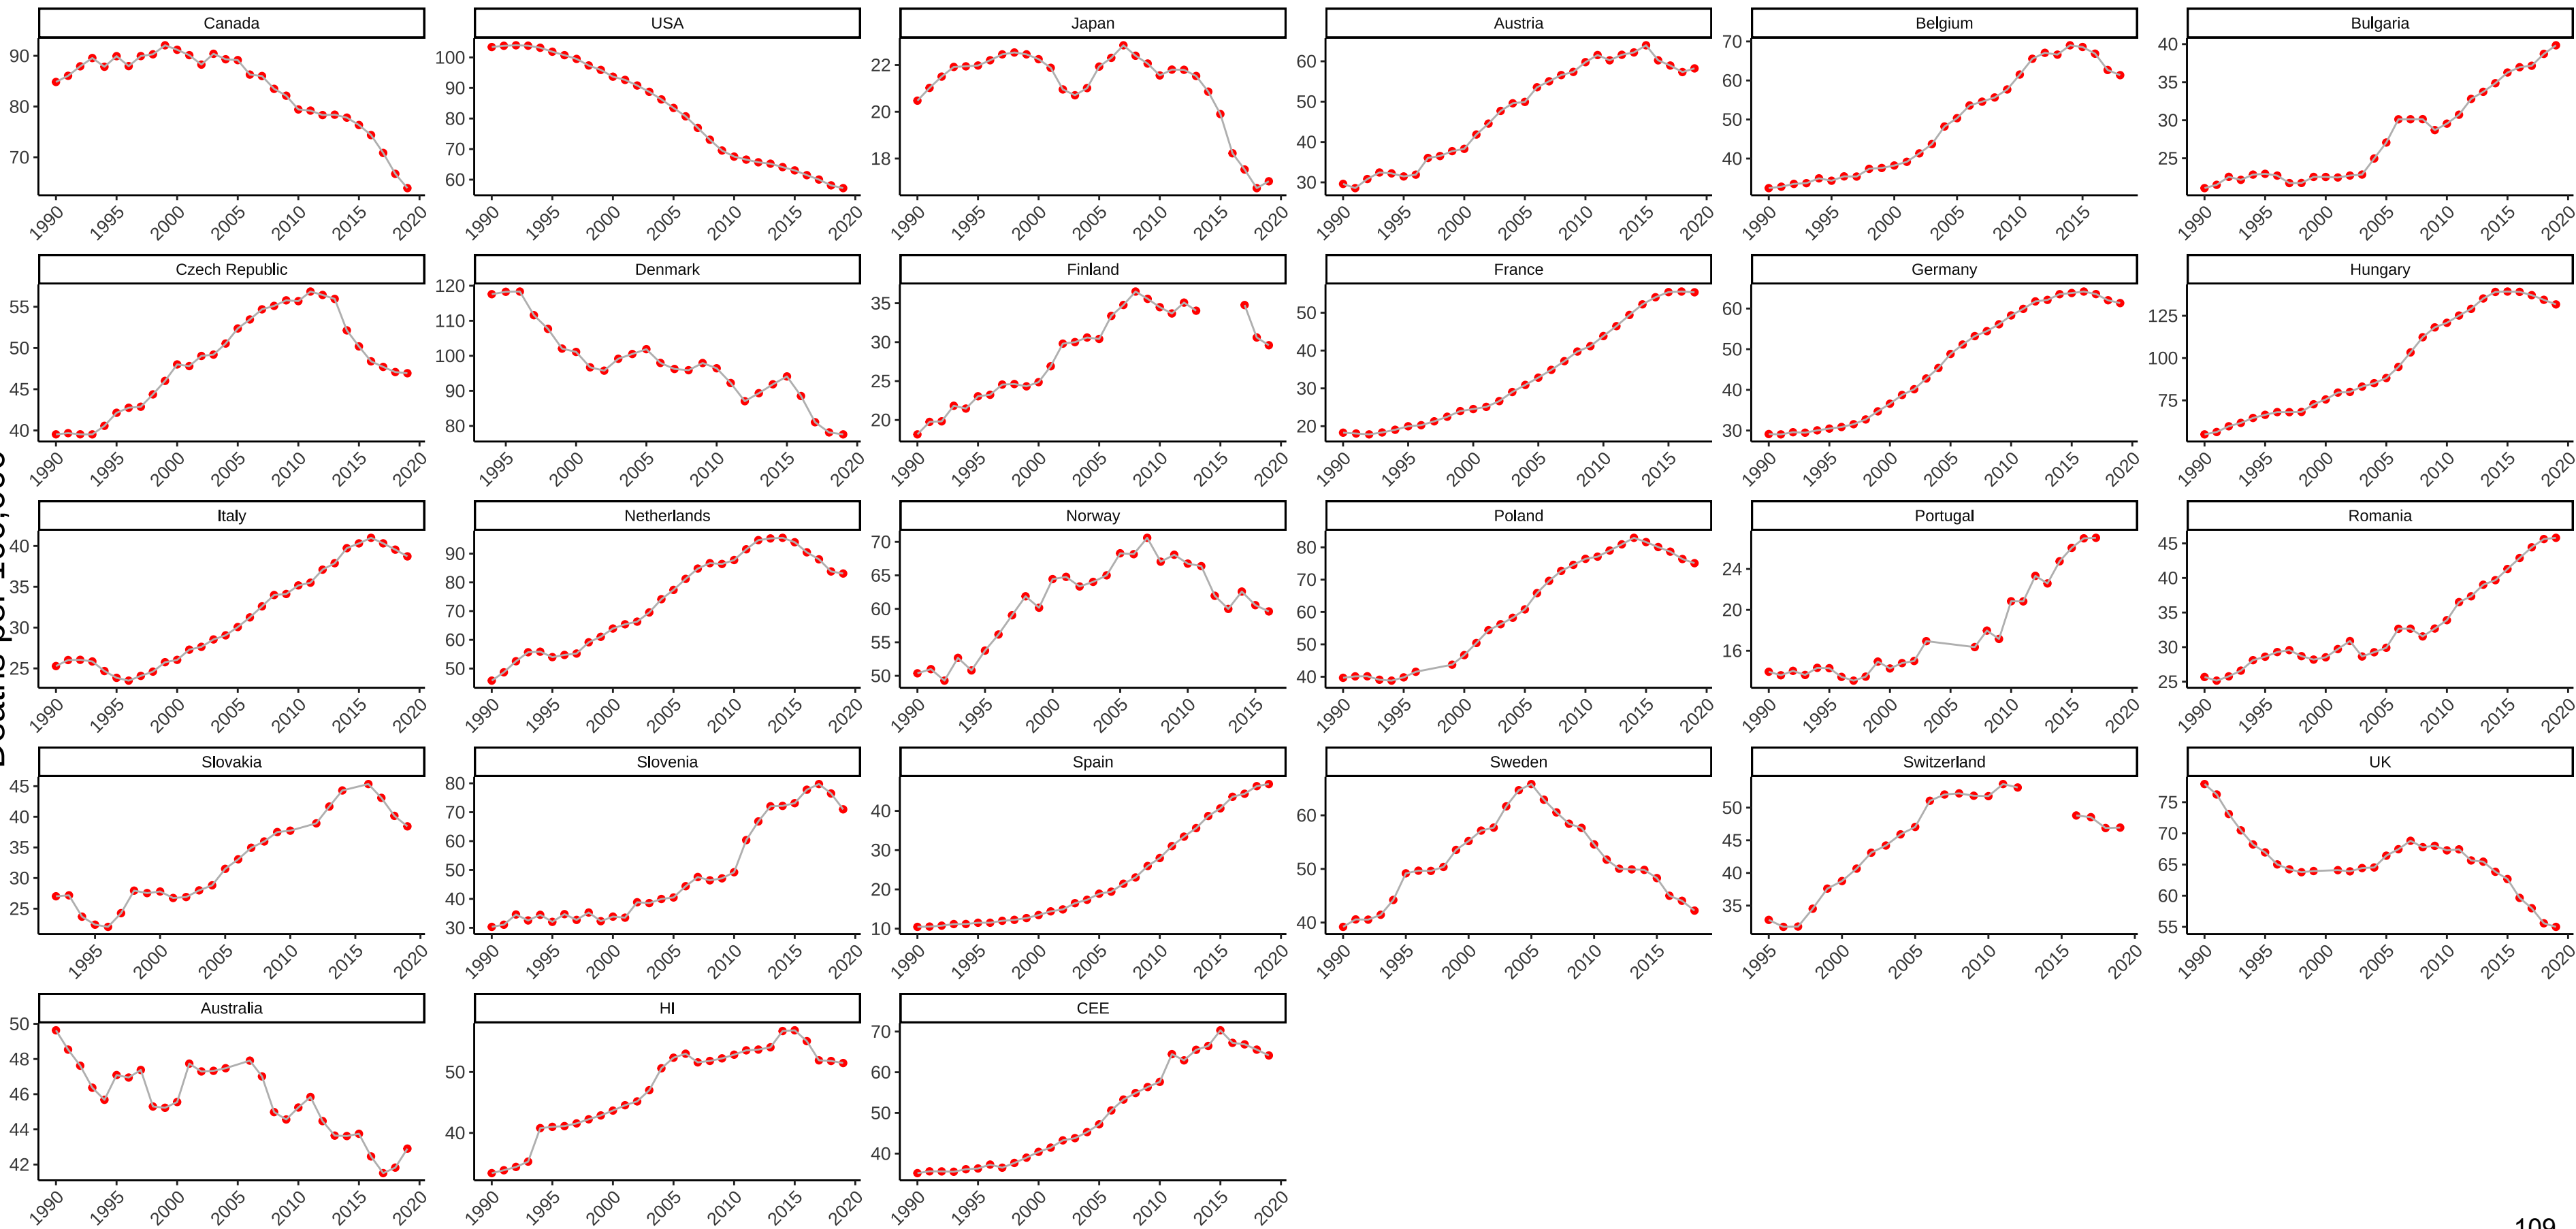

Year

**Figure S103. Three-Year Moving Average of Male Mortality from All Other Cancers at Ages 55-64**

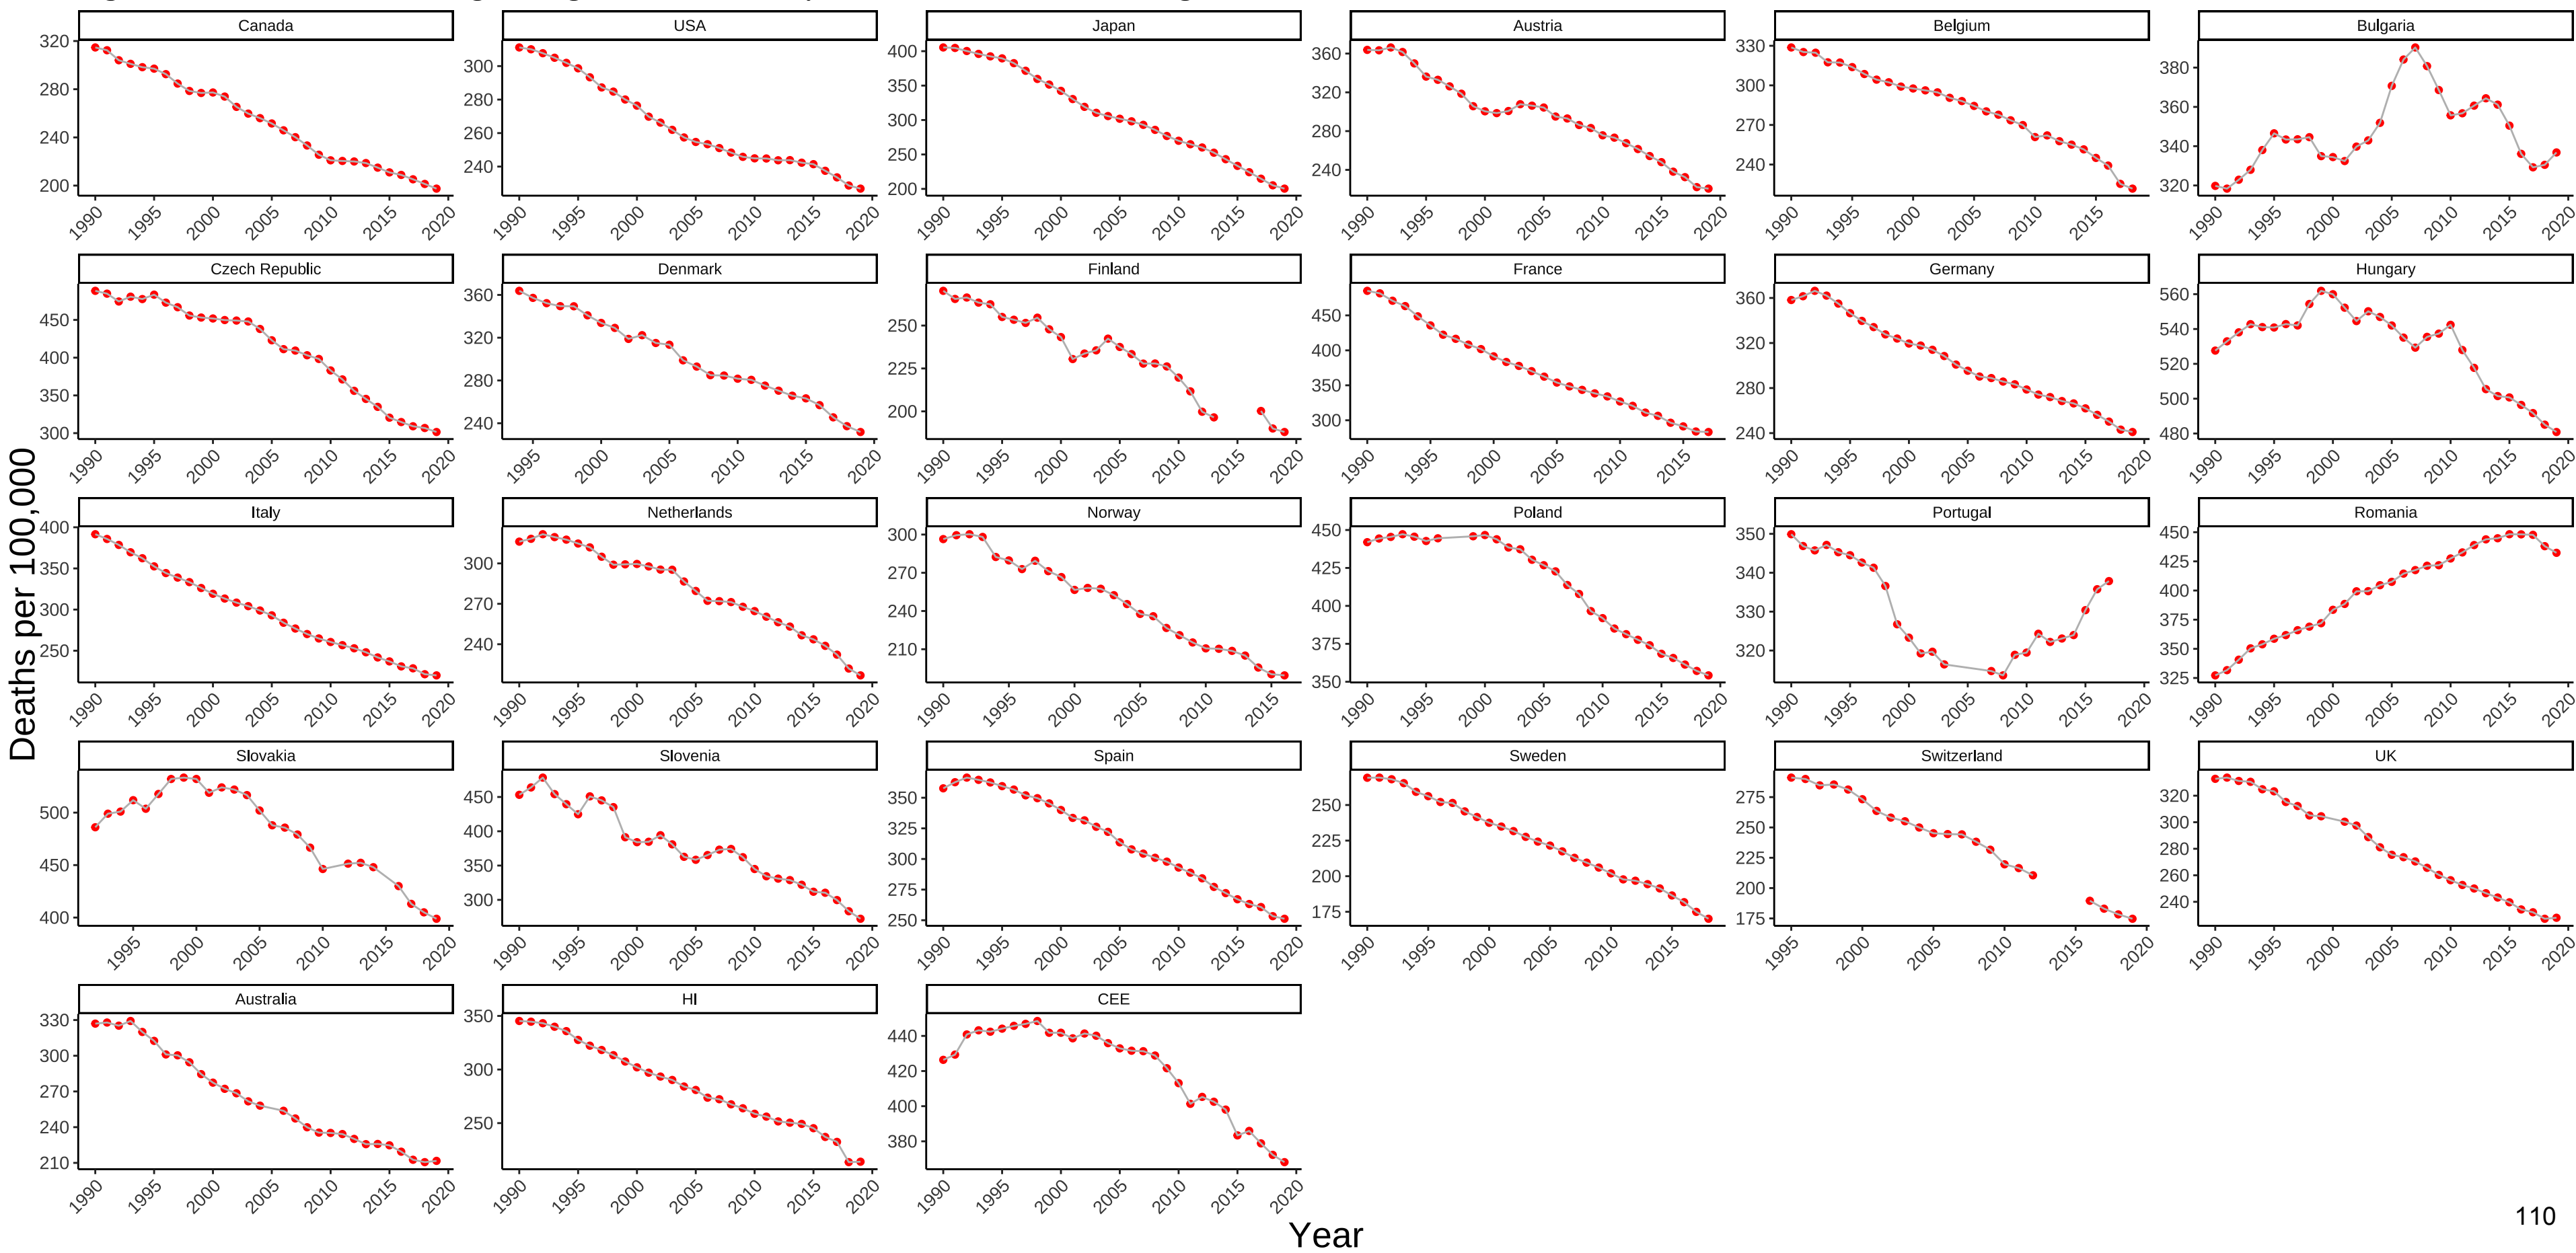

**Figure S104. Three-Year Moving Average of Female Mortality from All Other Cancers at Ages 55-64**

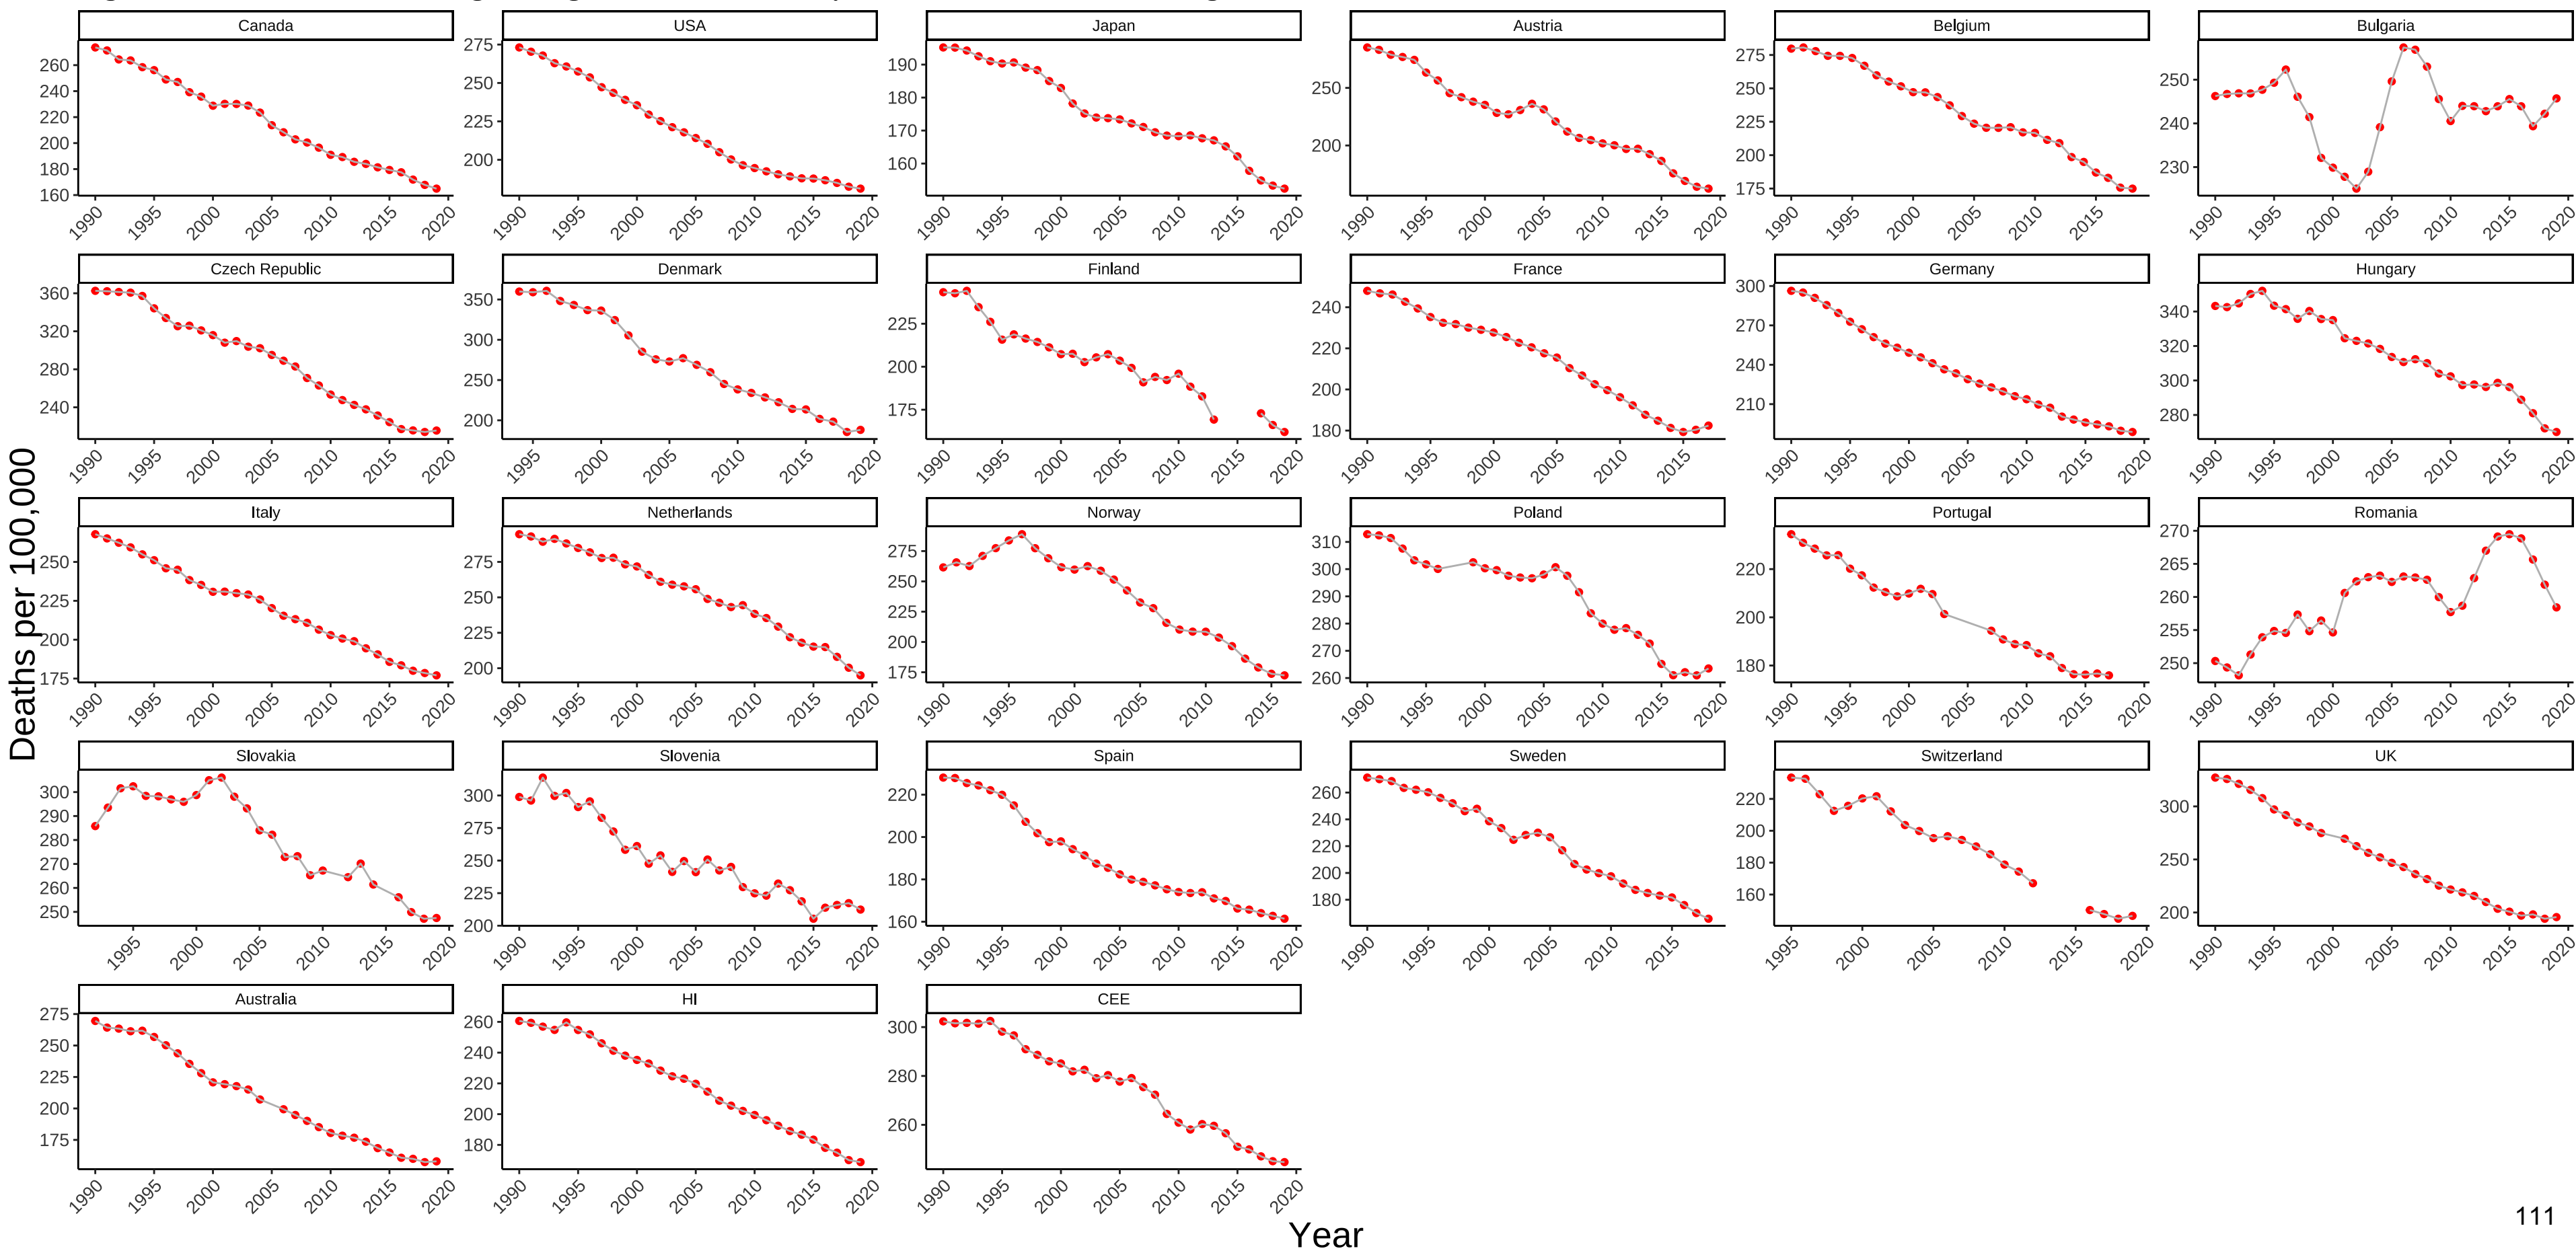

**Figure S105. Three-Year Moving Average of Male Mortality from Nervous System Diseases at Ages 55-64**

Deaths per 100,000

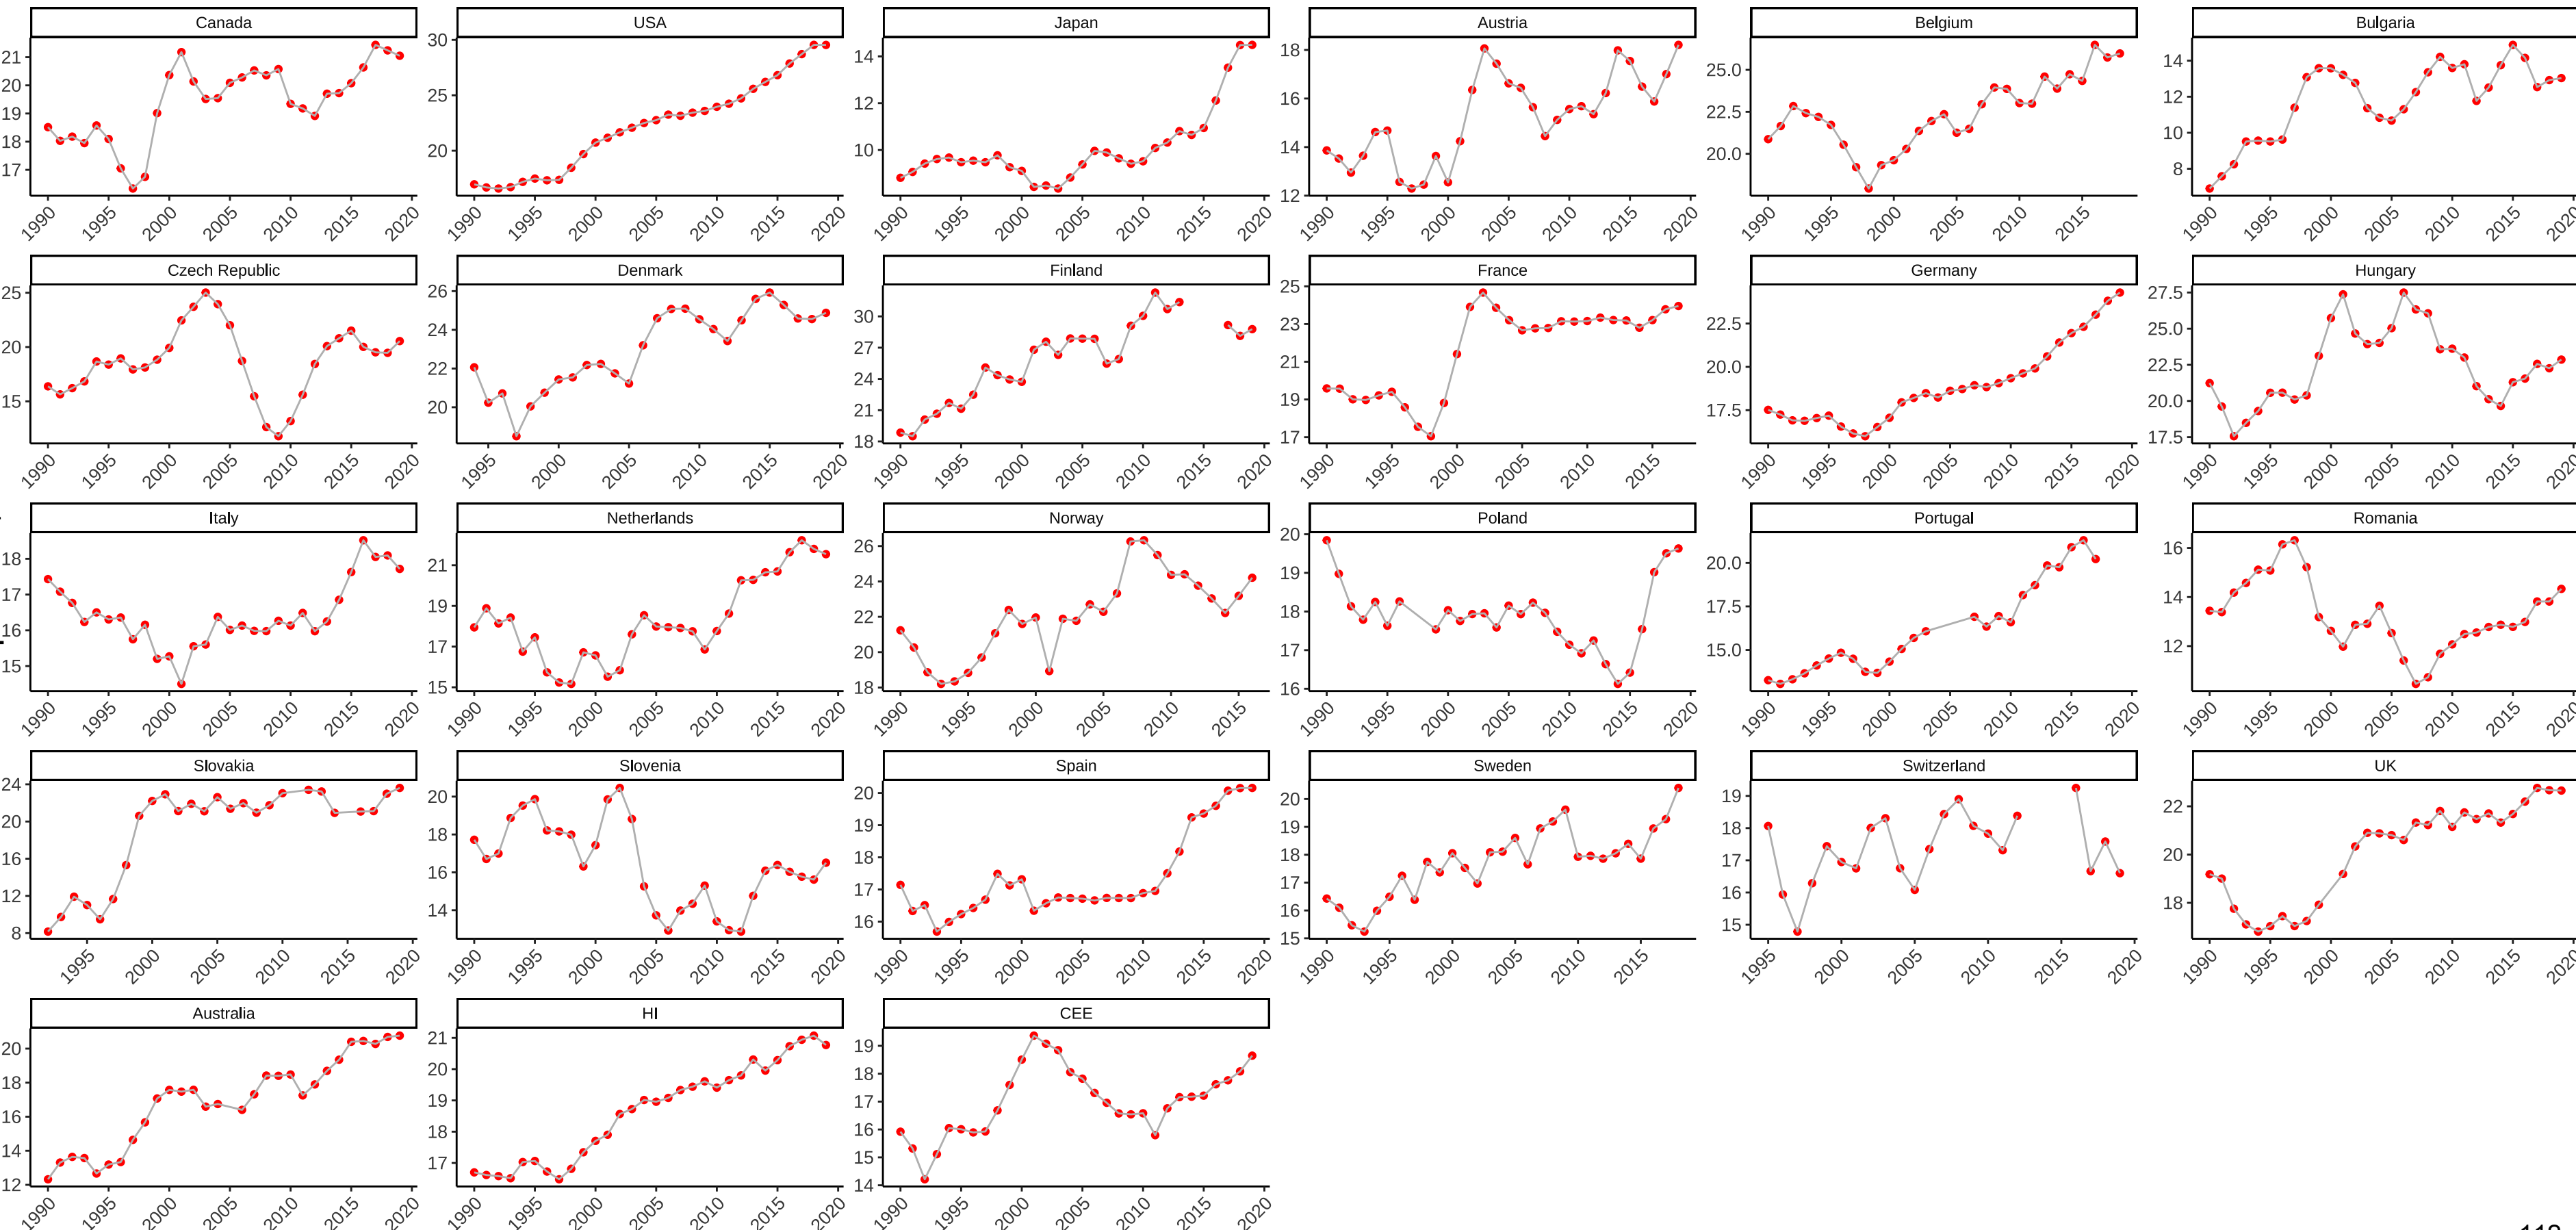

Year

**Figure S106. Three-Year Moving Average of Female Mortality from Nervous System Diseases at Ages 55-64**

Deaths per 100,000

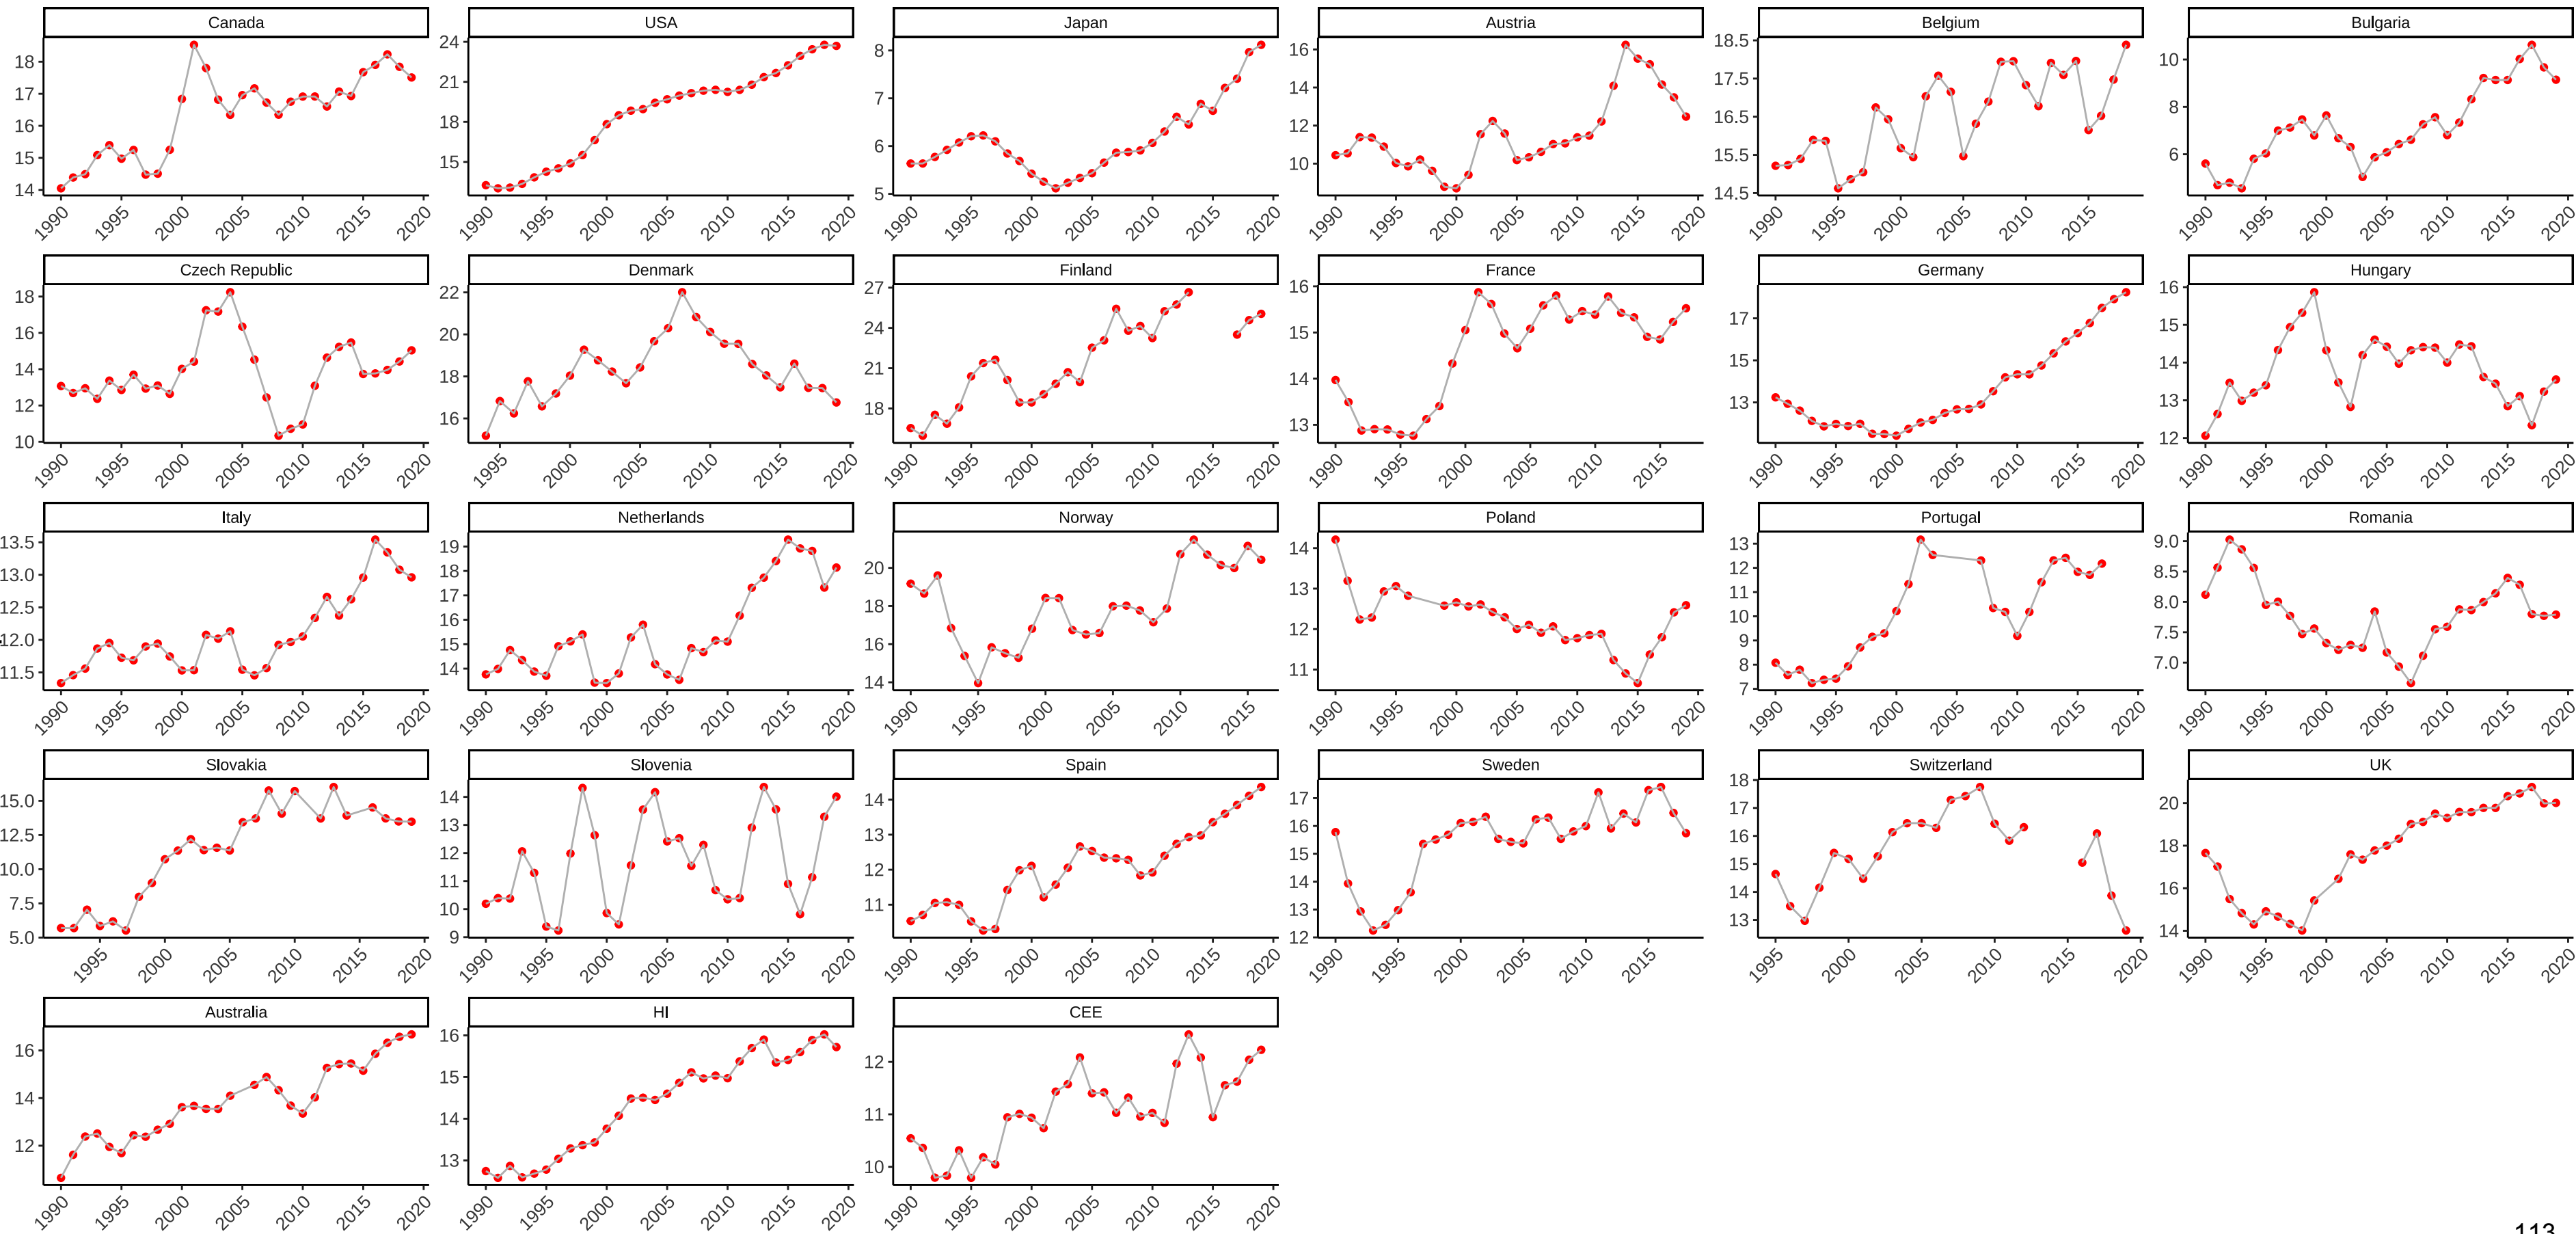

Year

**Figure S107. Three-Year Moving Average of Male Mortality from Metabolic Diseases at Ages 55-64**

Deaths per 100,000

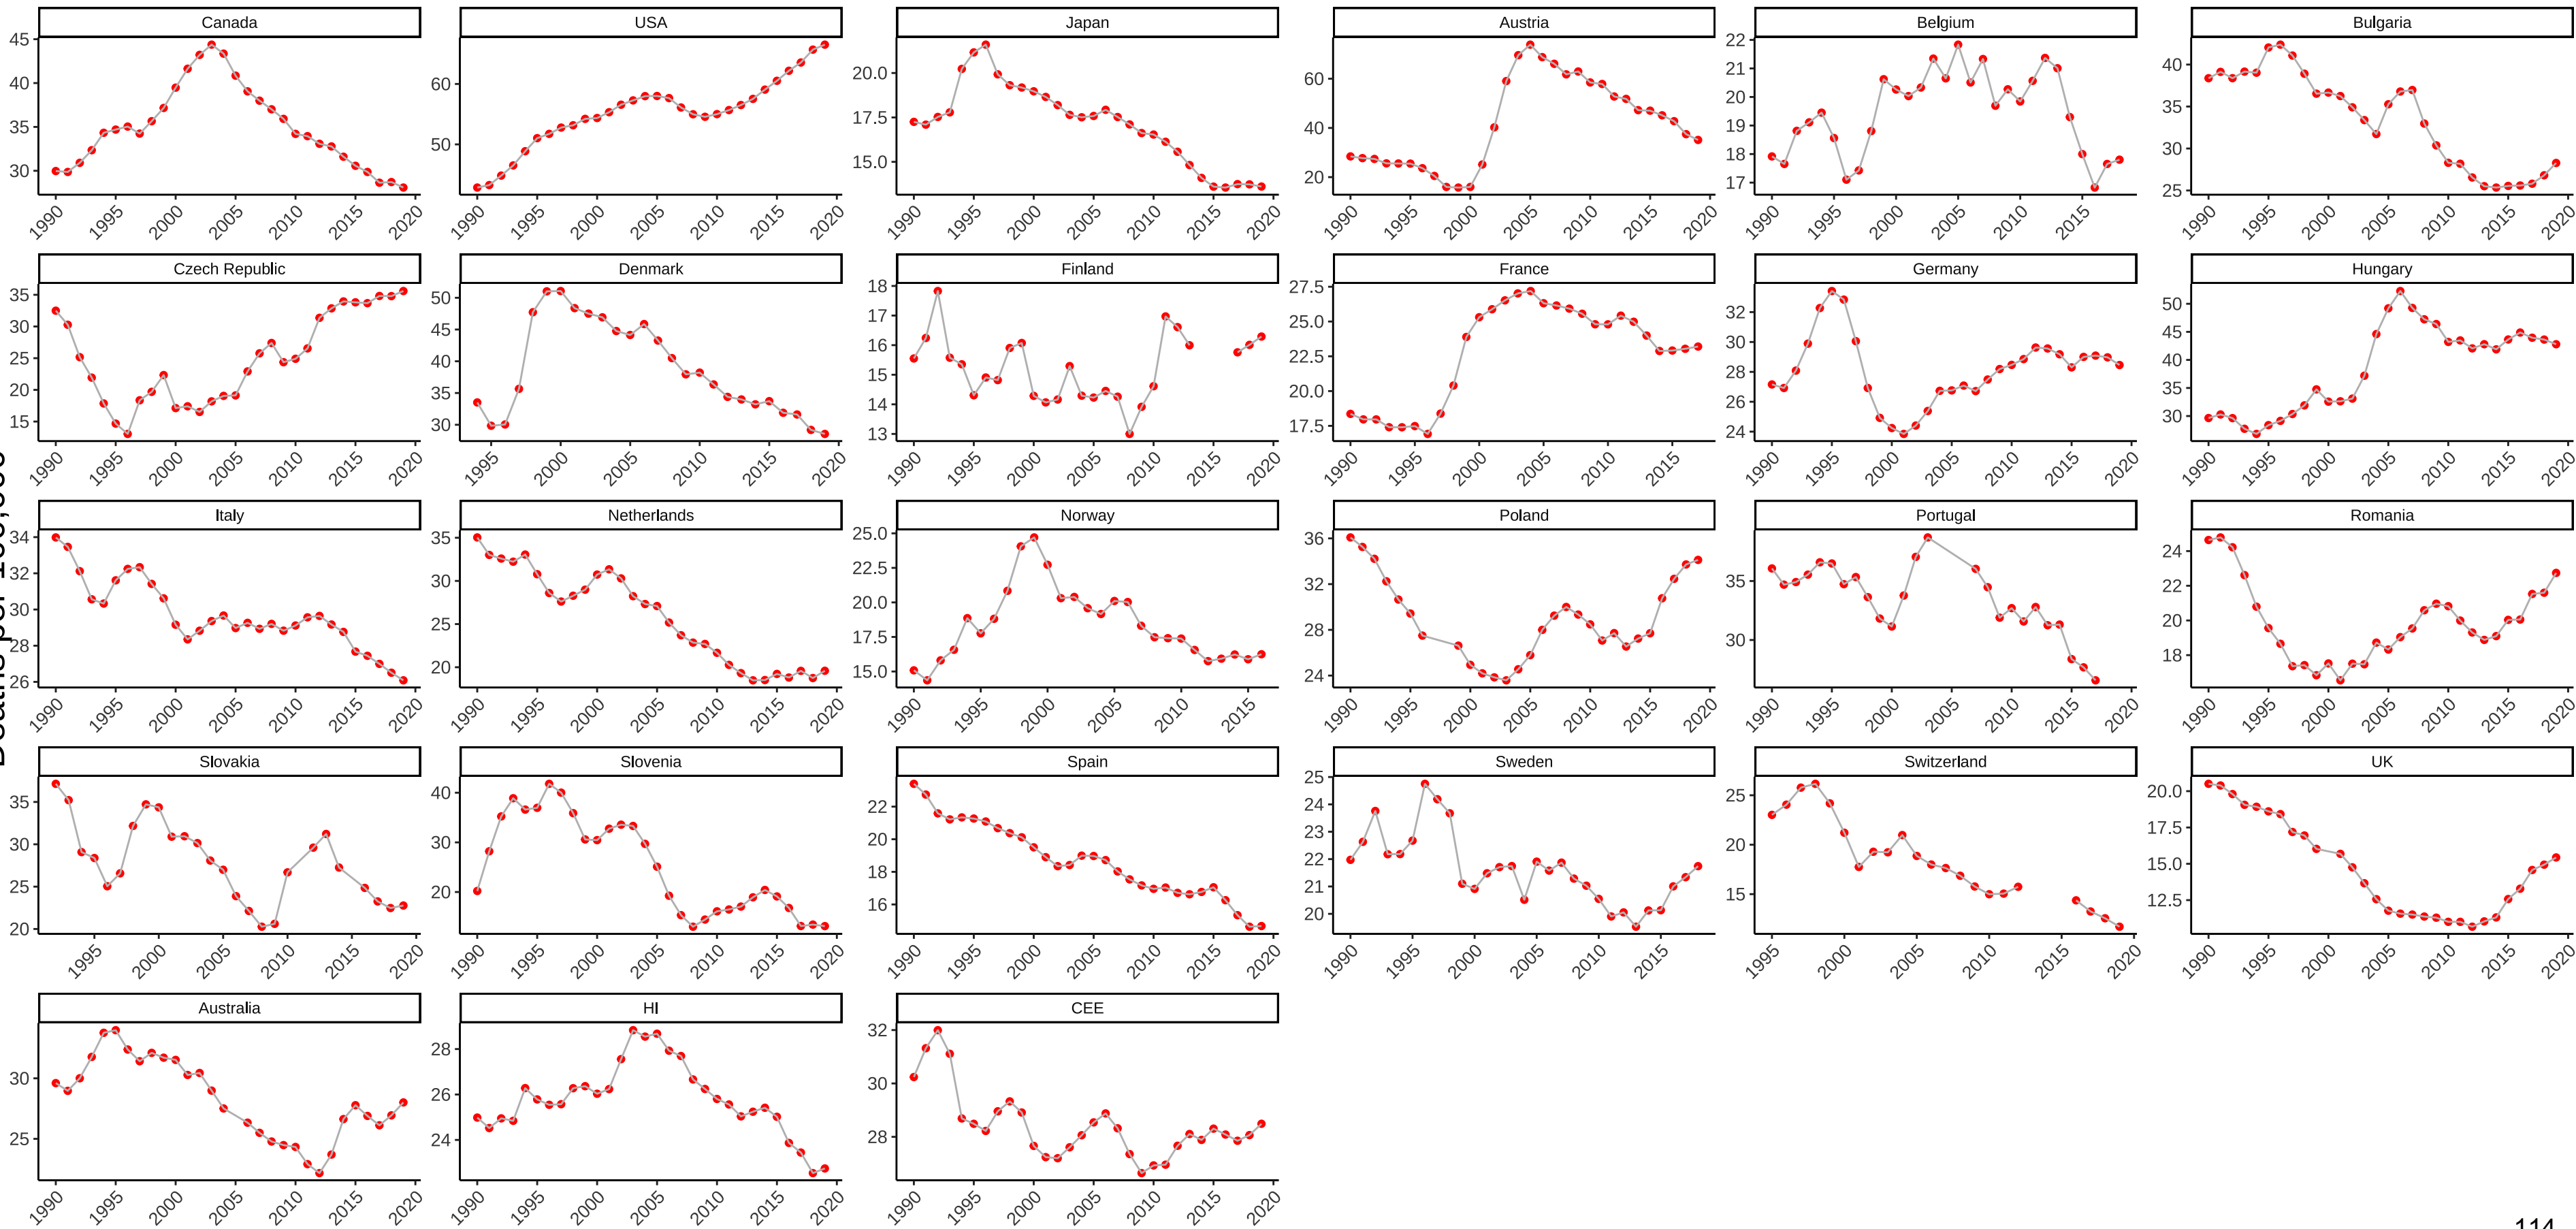

Year

**Figure S108. Three-Year Moving Average of Female Mortality from Metabolic Diseases at Ages 55-64**

Deaths per 100,000

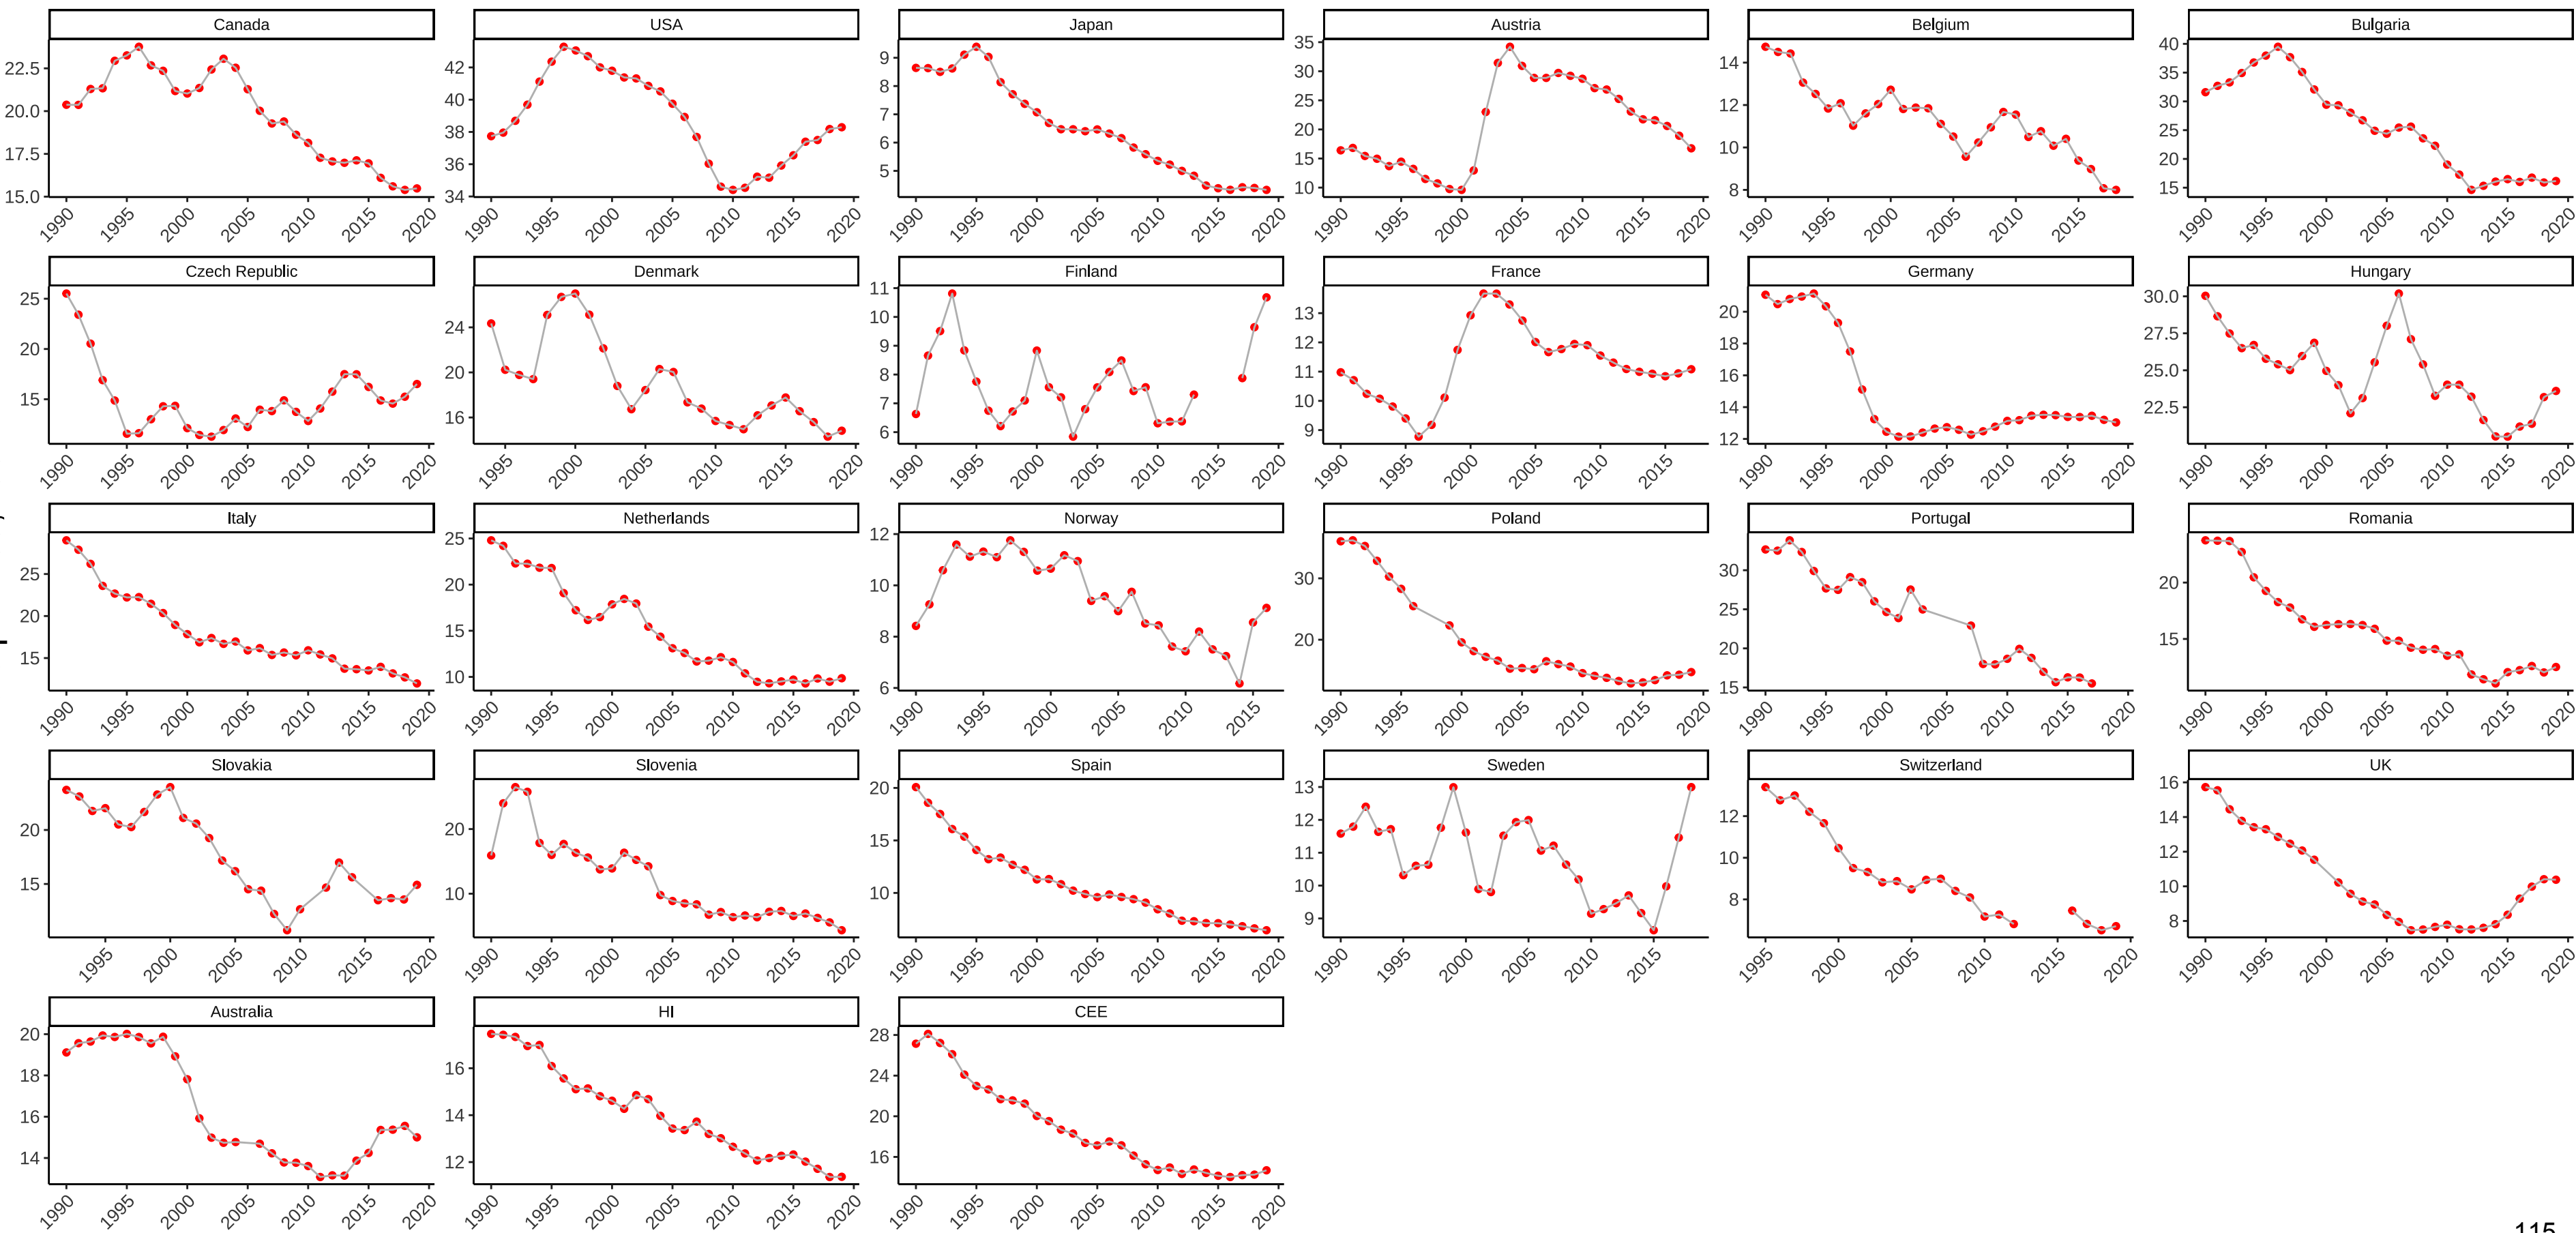

Year

**Figure S109. Three-Year Moving Average of Male Mortality from Cardiovascular Disease at Ages 55-64**

Deaths per 100,000

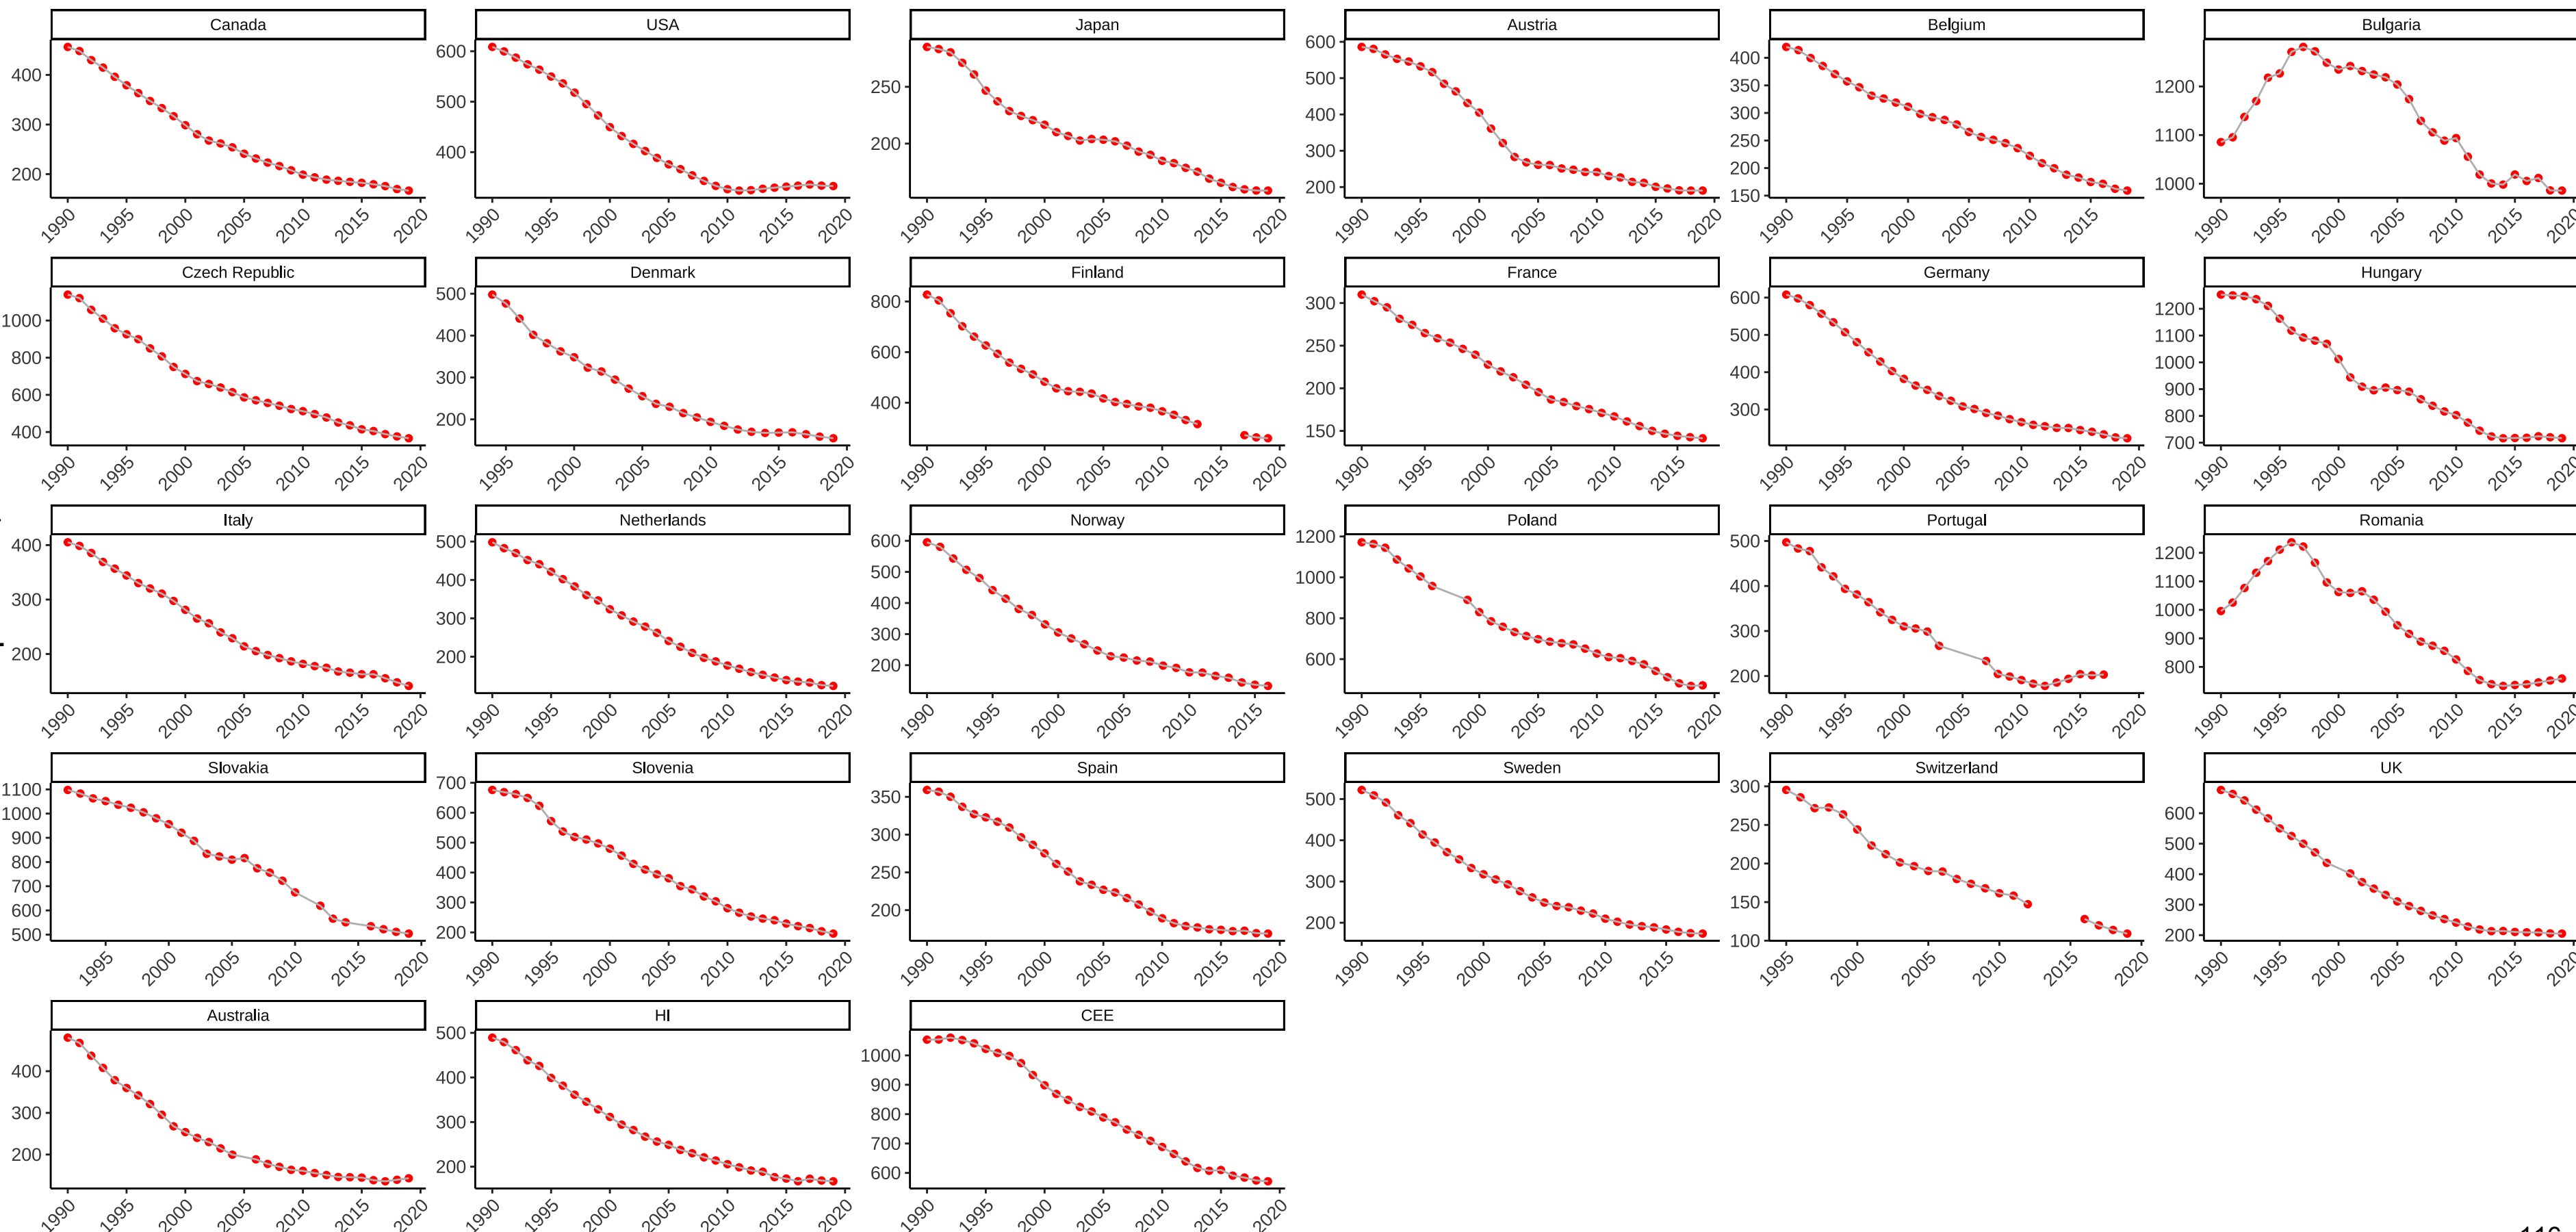

Year

**Figure S110. Three-Year Moving Average of Female Mortality from Cardiovascular Disease at Ages 55-64**

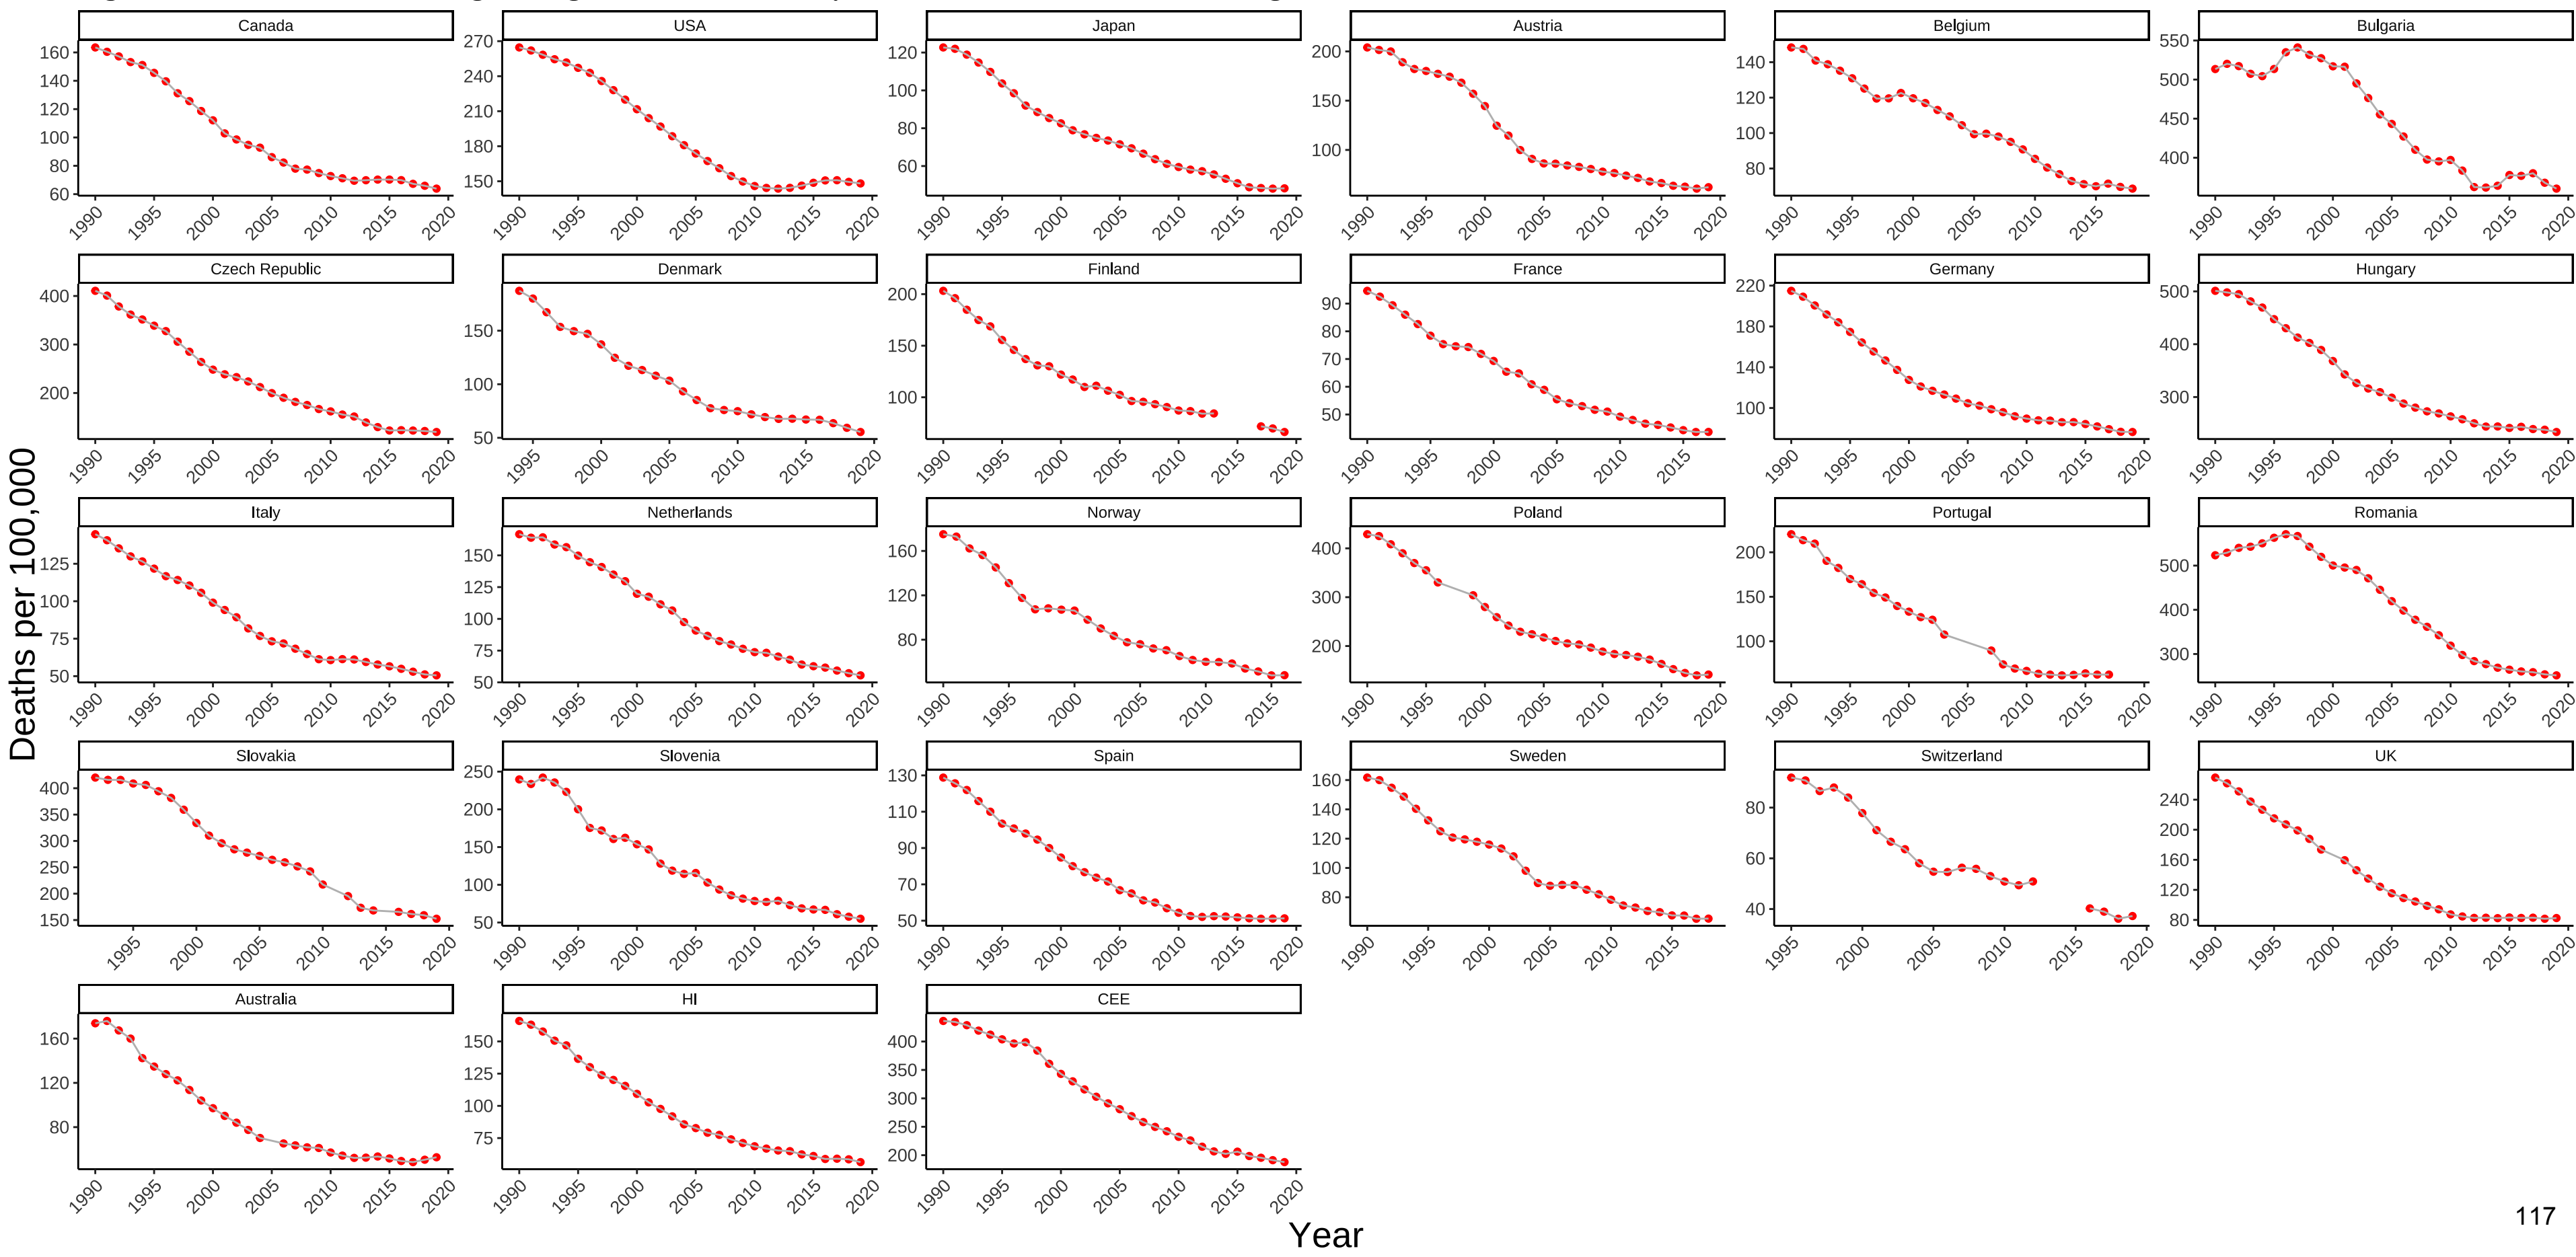

**Figure S111. Three-Year Moving Average of Male Mortality from Suicide at Ages 55-64**

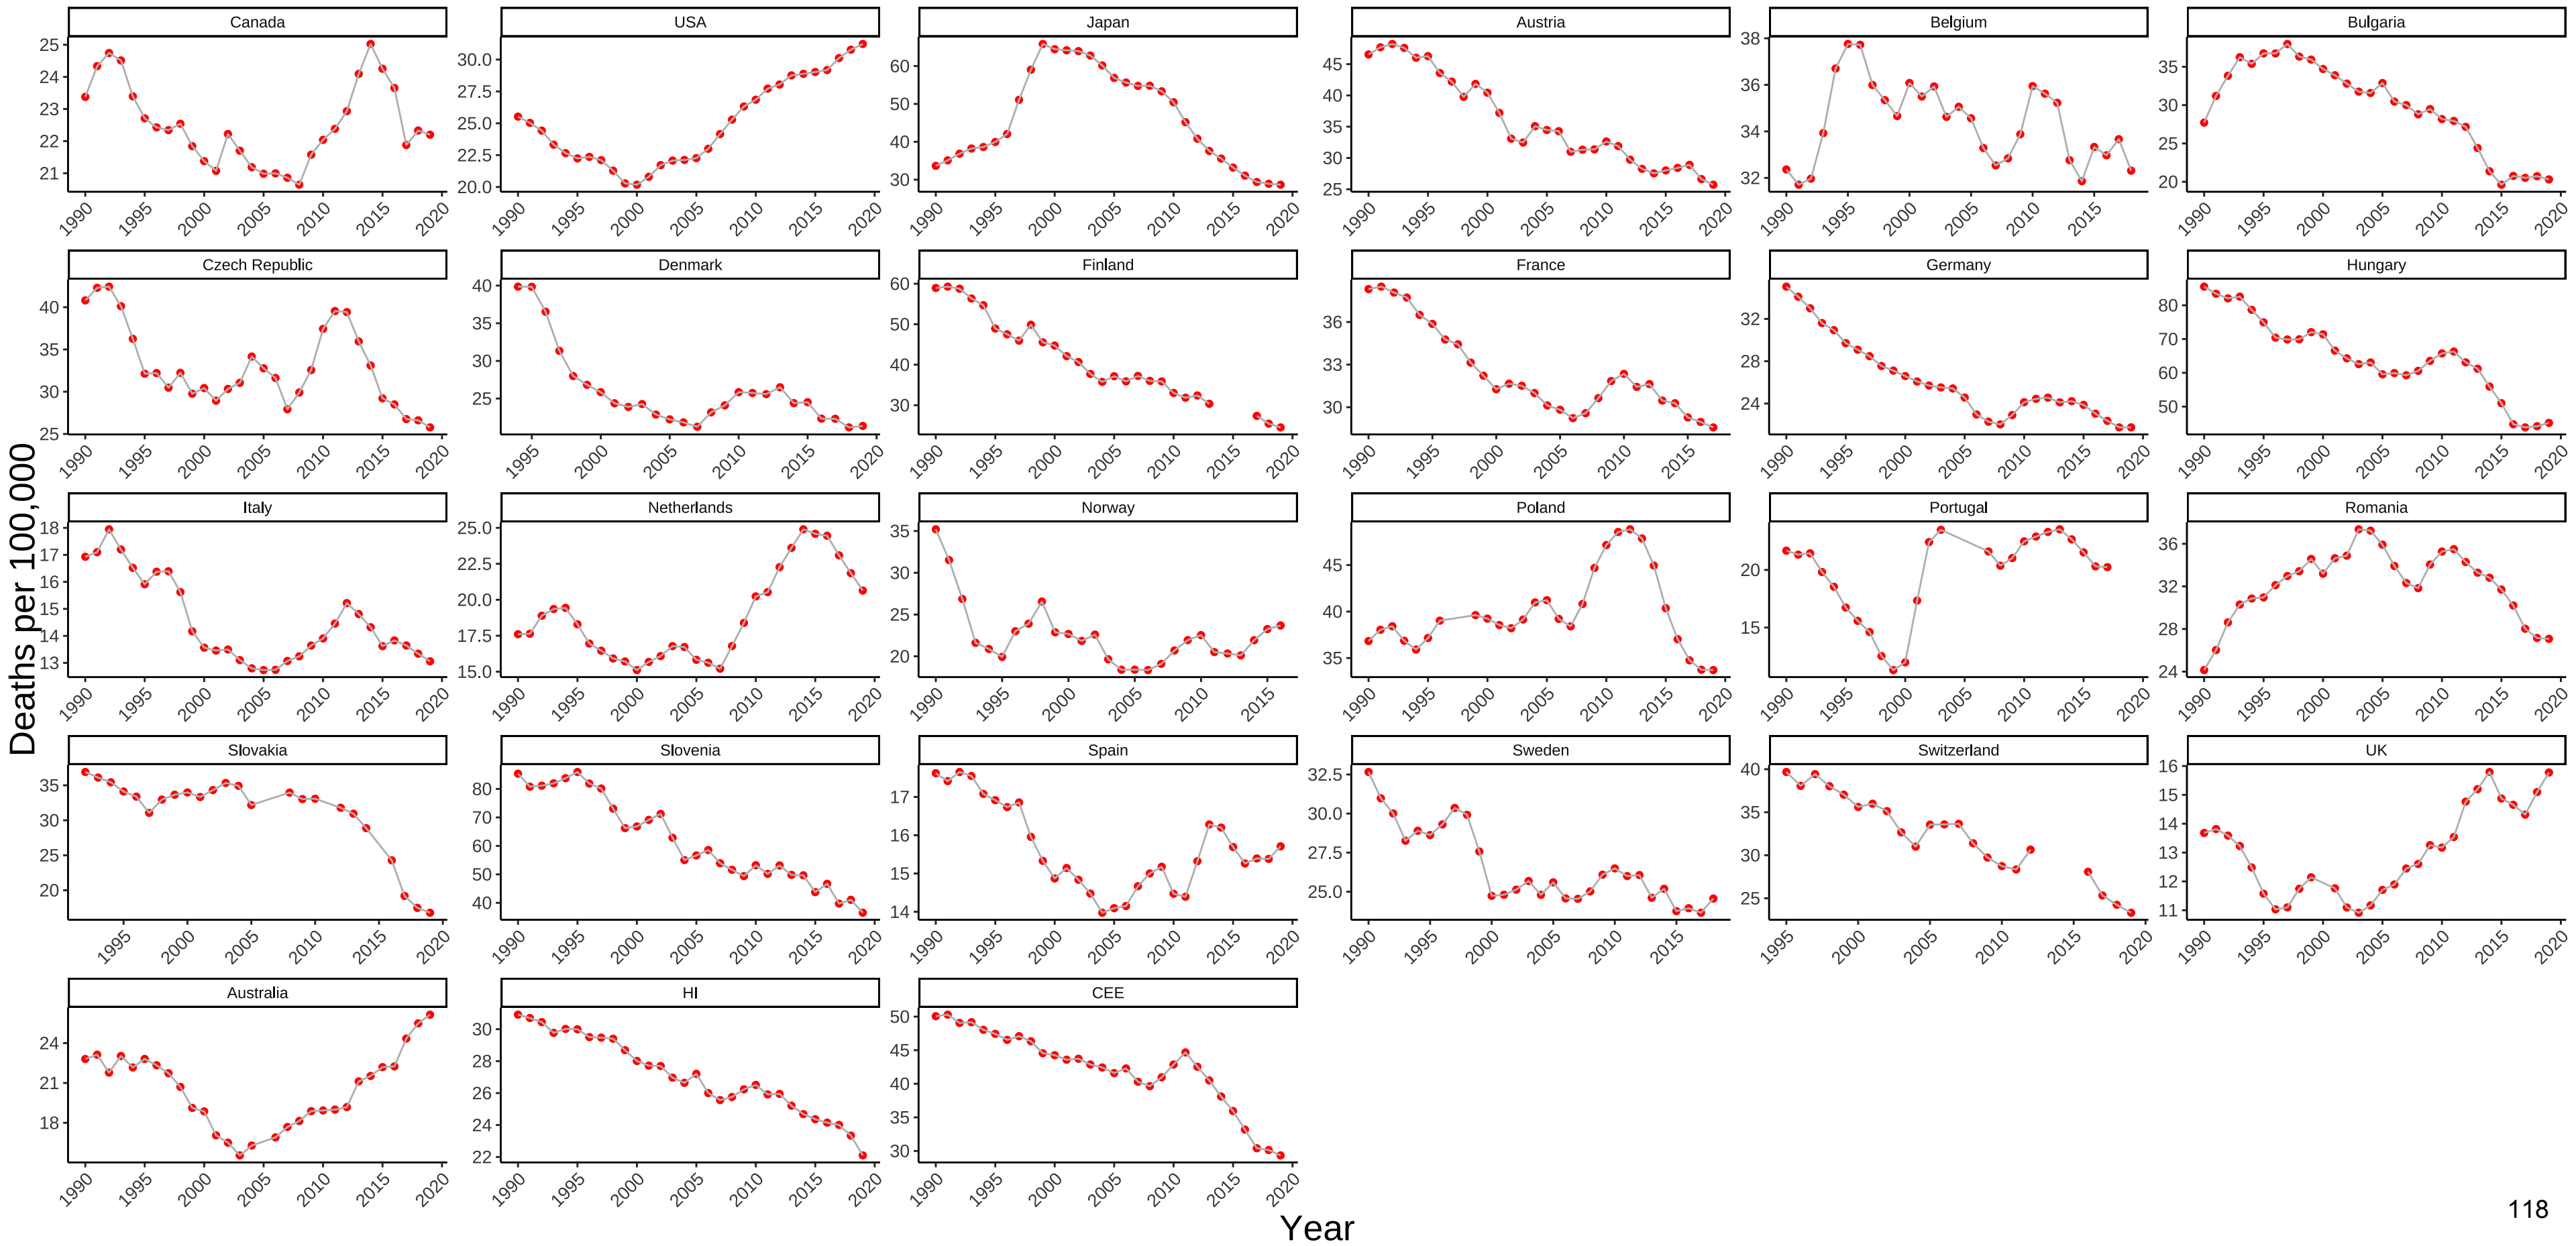

**Figure S112. Three-Year Moving Average of Female Mortality from Suicide at Ages 55-64**

Deaths per 100,000

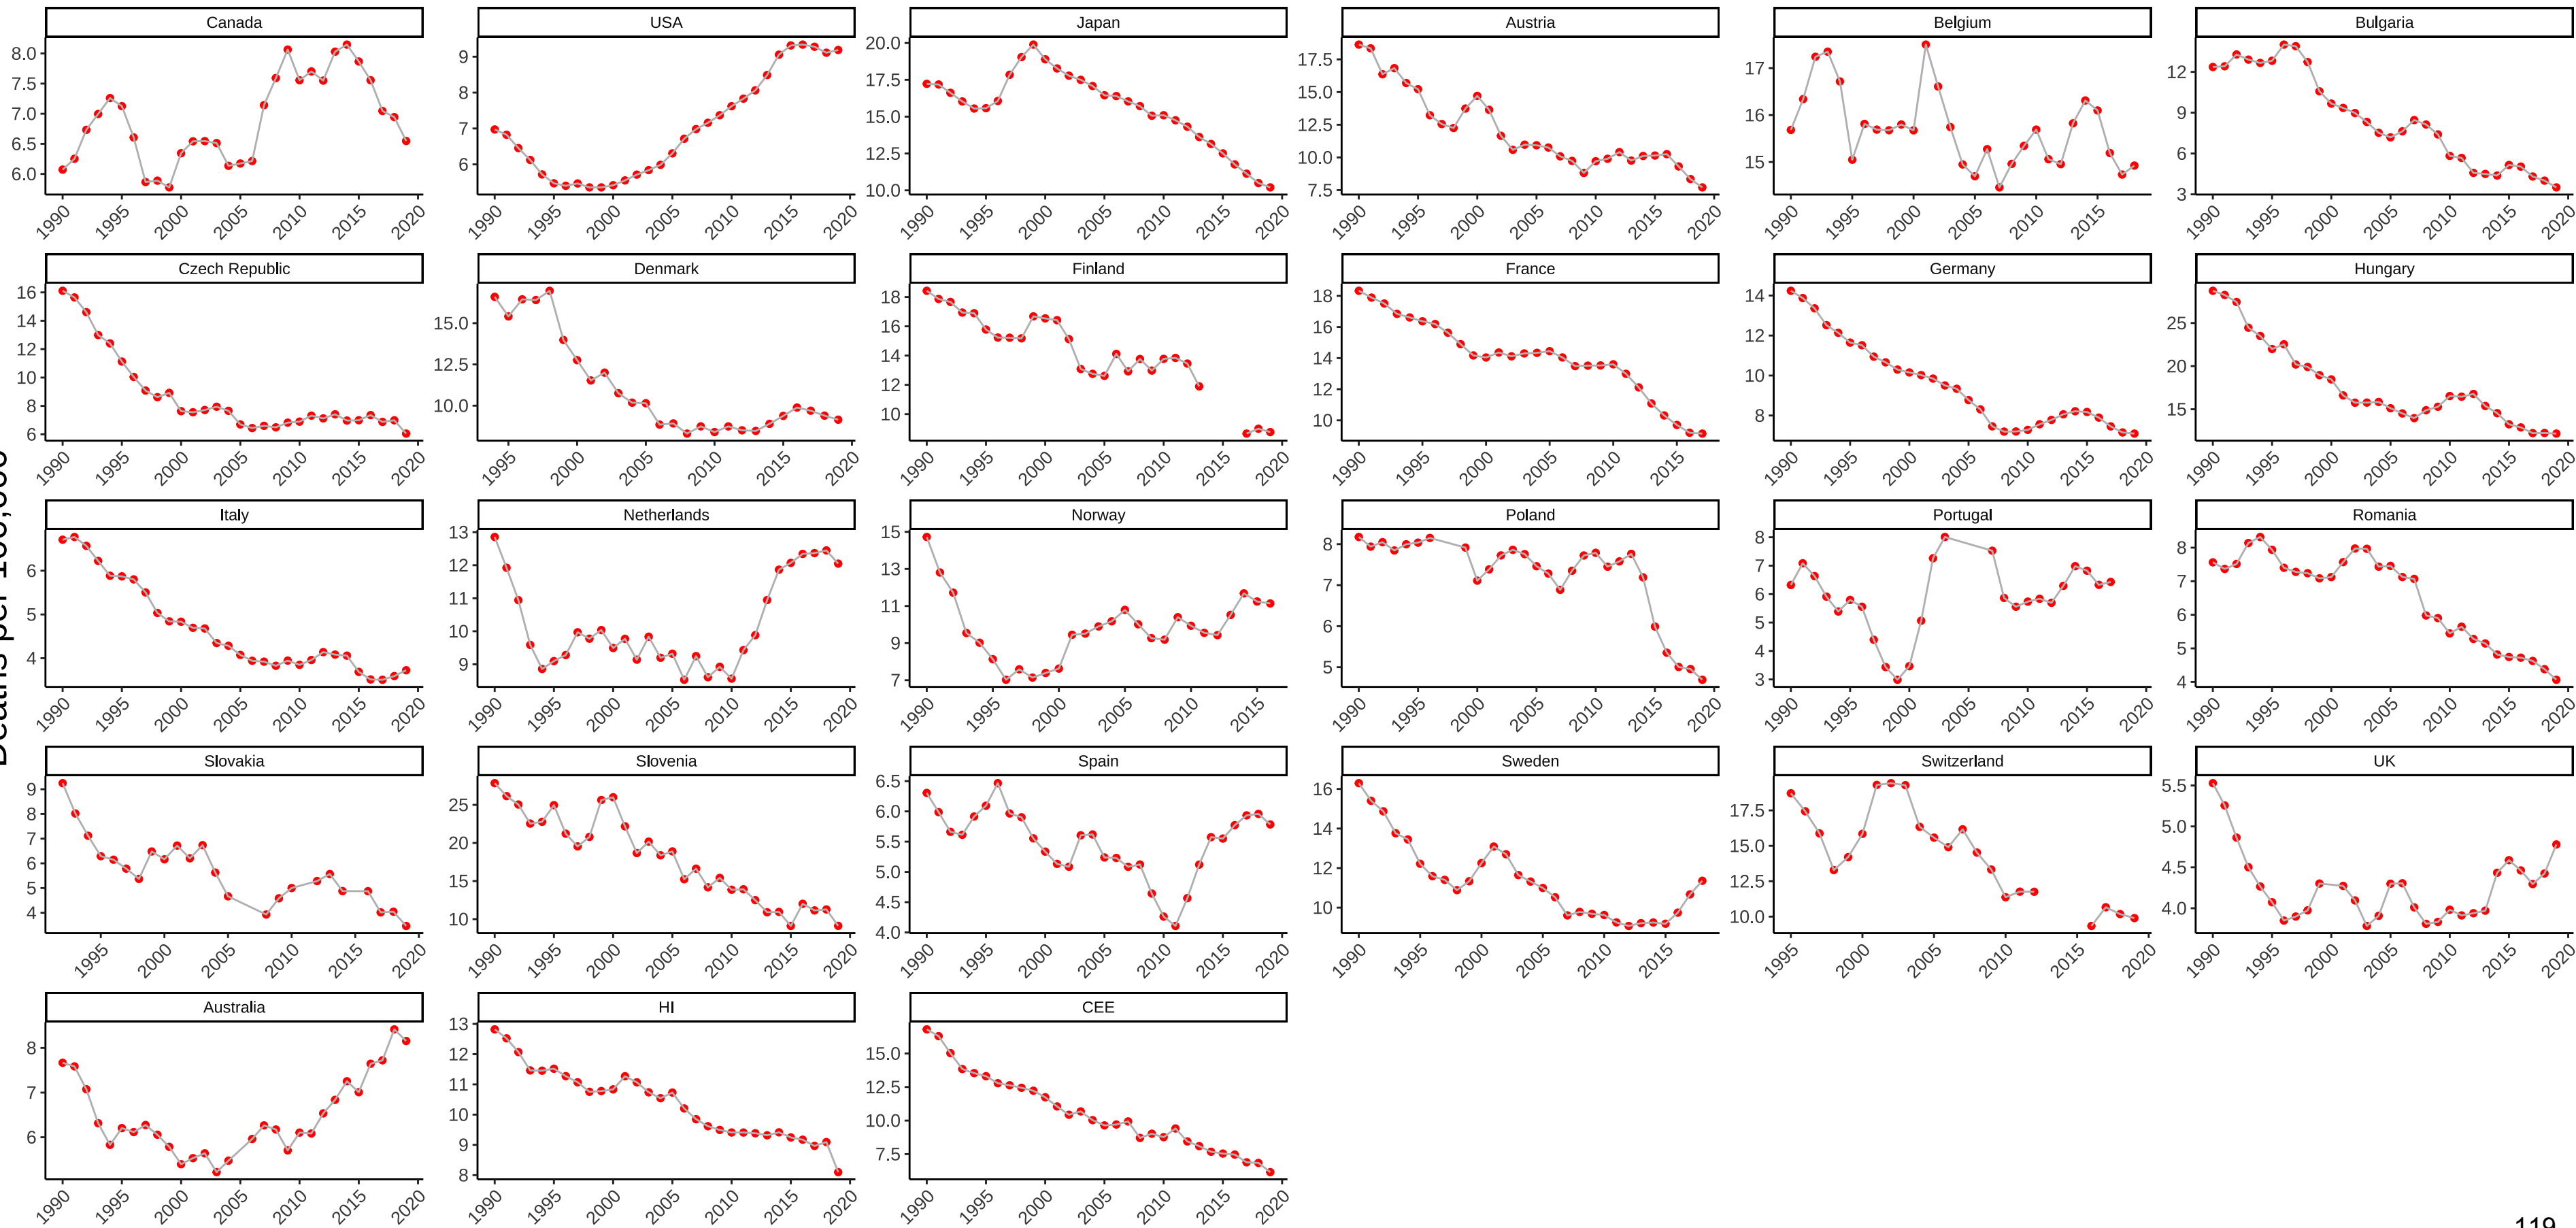

**Figure S113. Three-Year Moving Average of Male Mortality from Homicide at Ages 55-64**

Deaths per 100,000

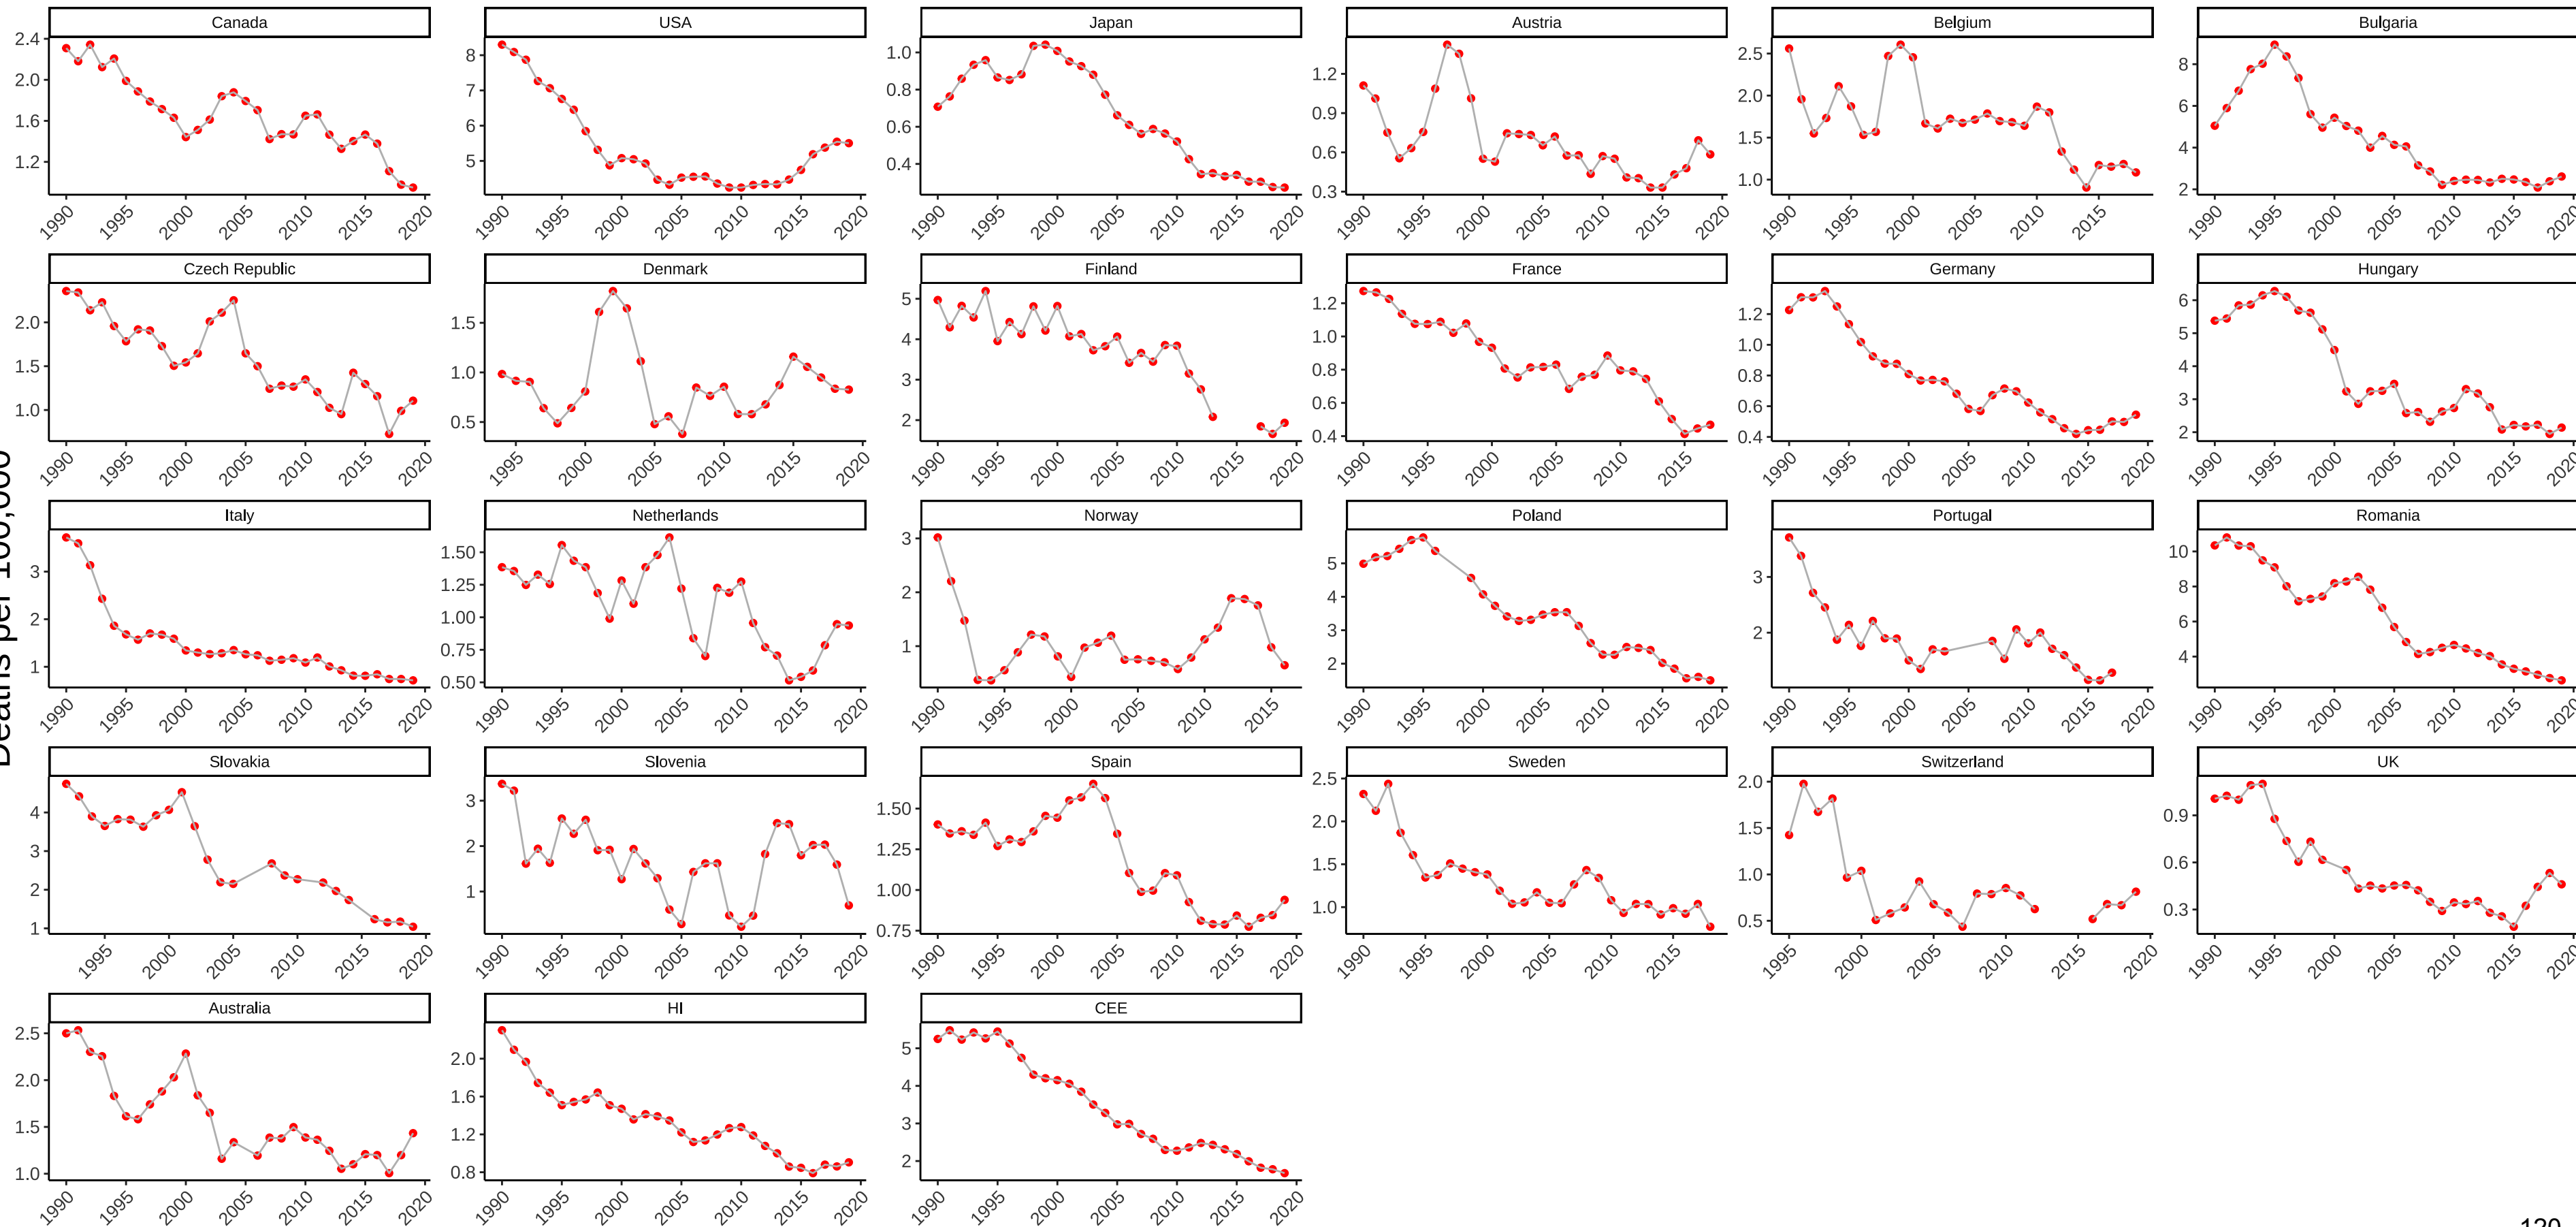

**Figure S114. Three-Year Moving Average of Female Mortality from Homicide at Ages 55-64**

Deaths per 100,000

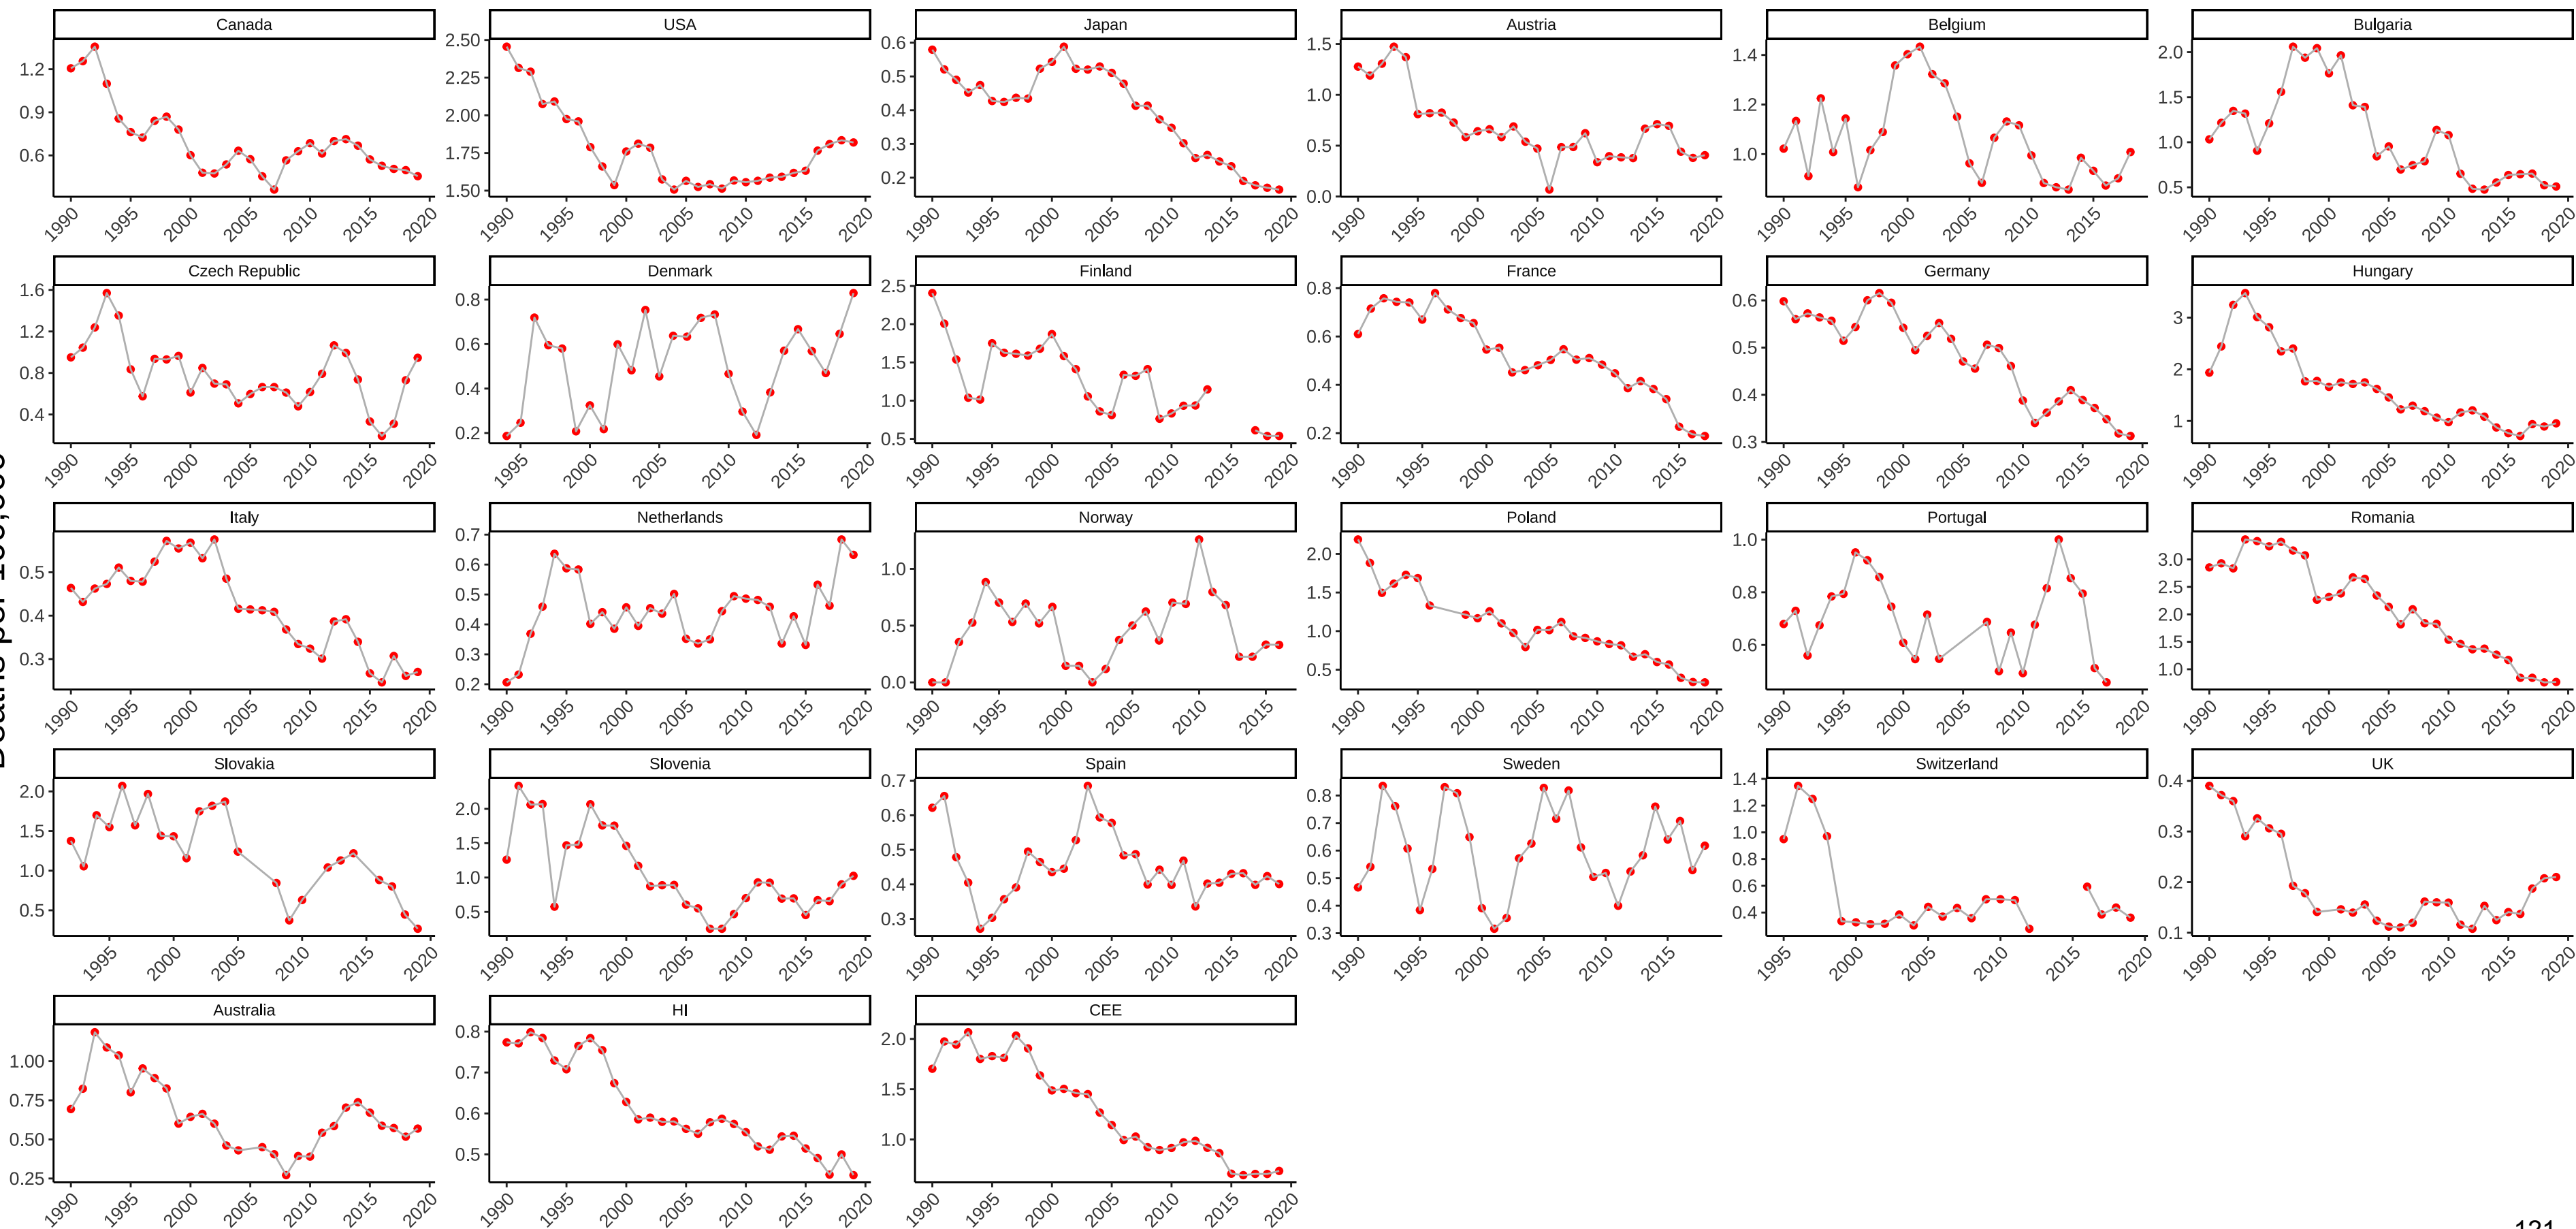

Year

**Figure S115. Three-Year Moving Average of Male Mortality from Transport Accidents at Ages 55-64**

Deaths per 100,000

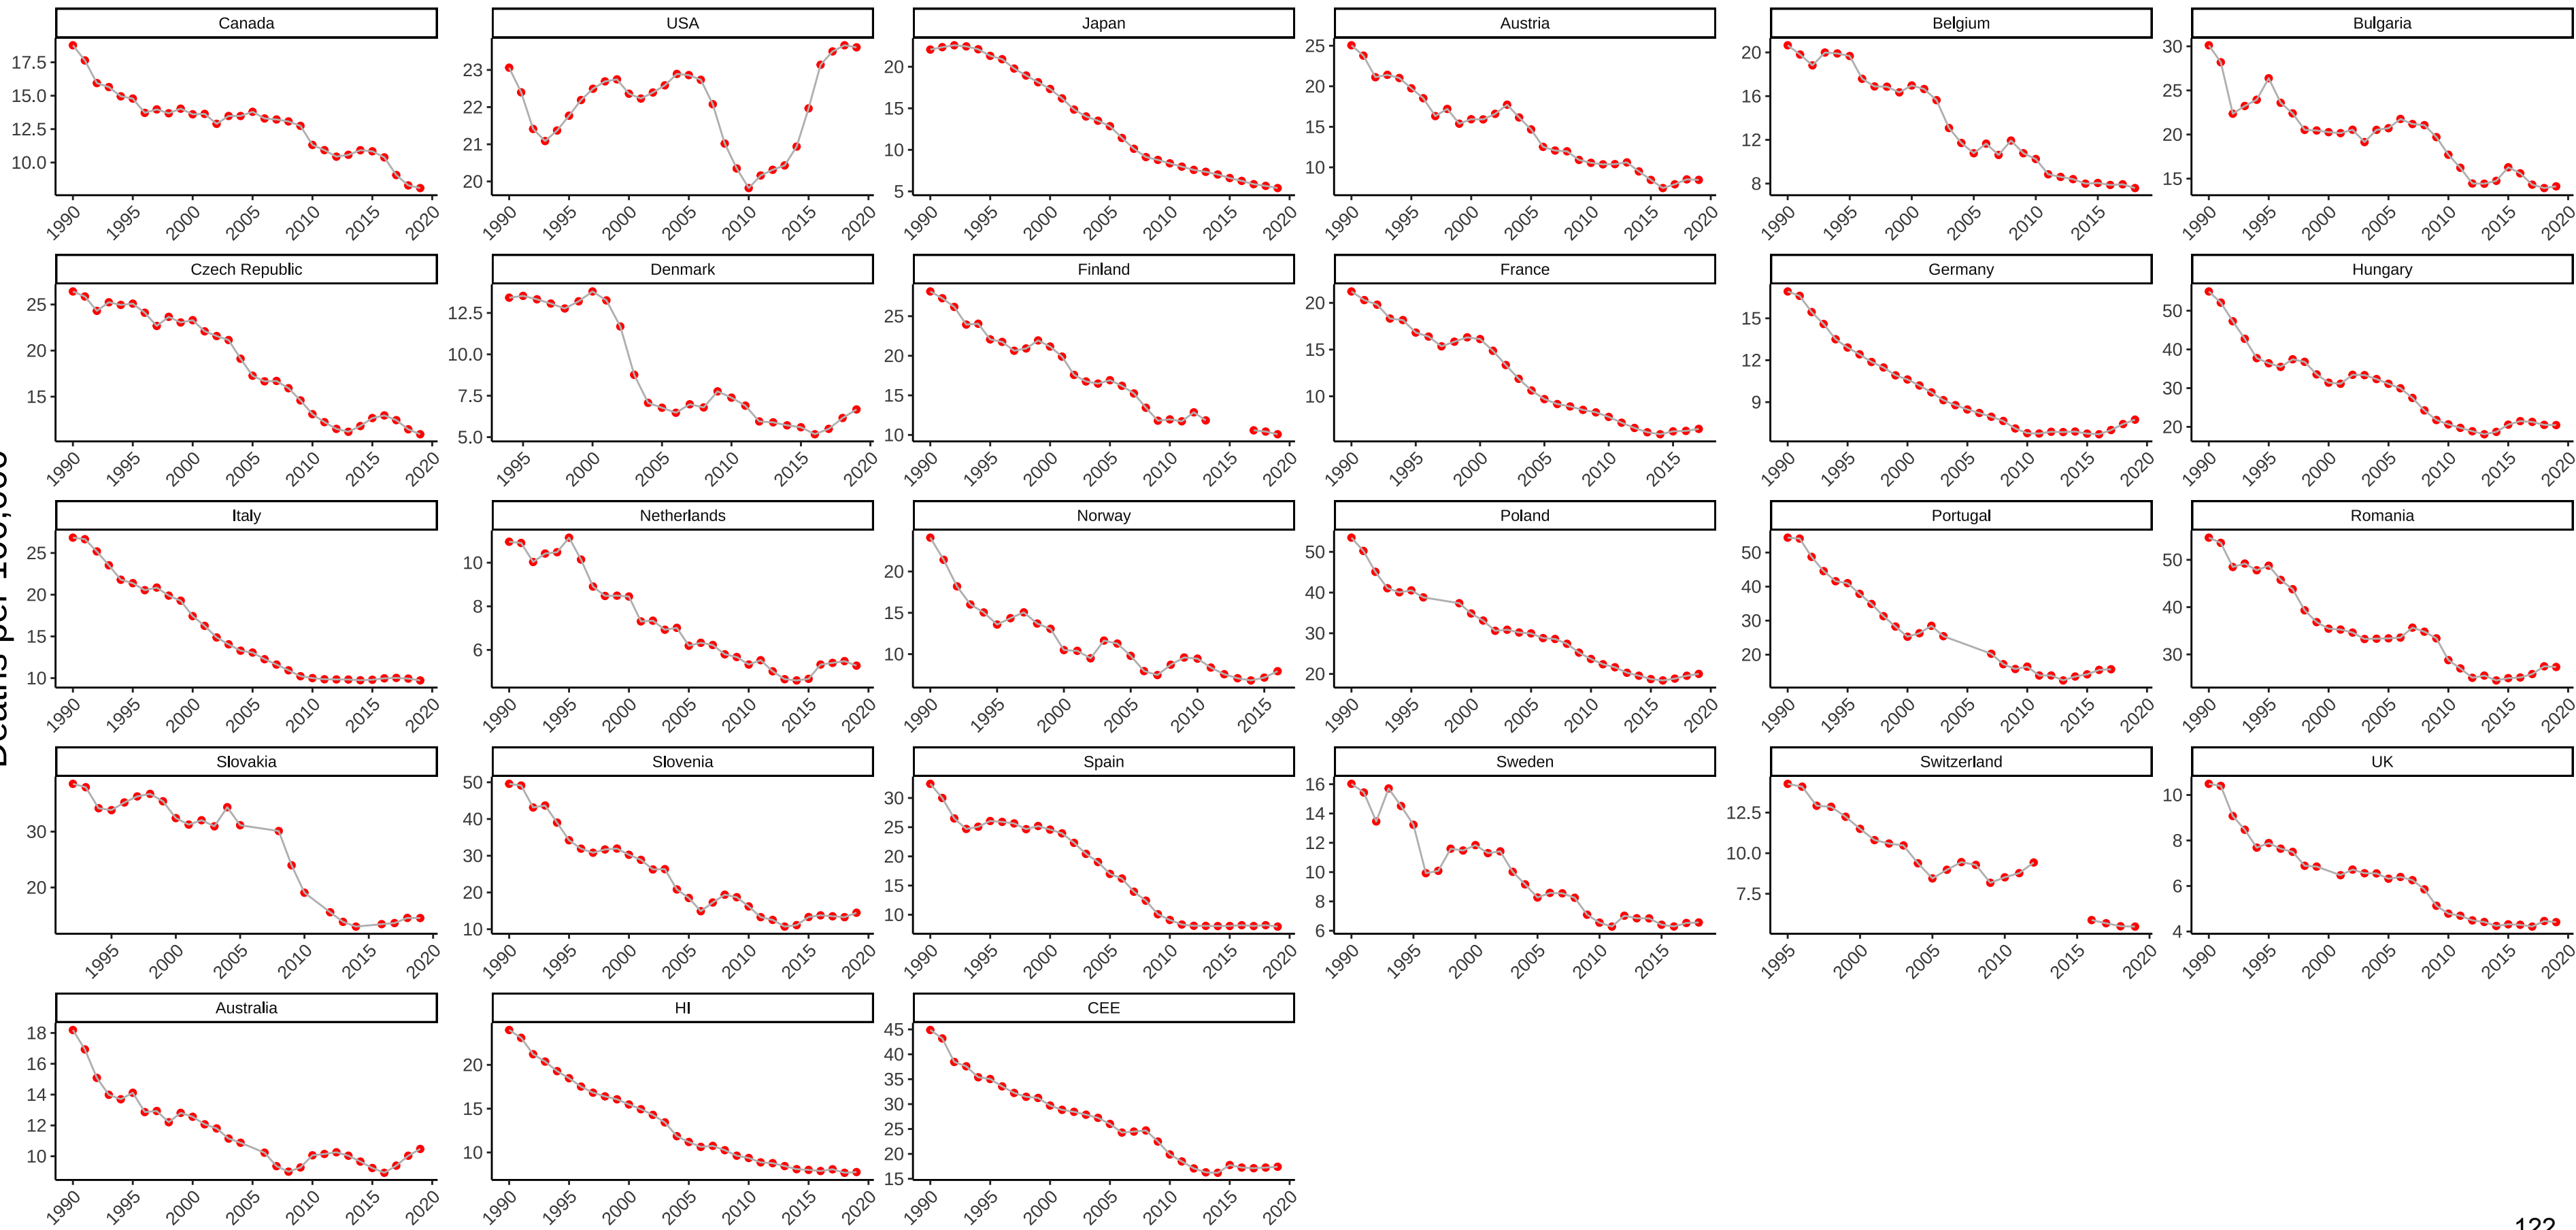

**Figure S116. Three-Year Moving Average of Female Mortality from Transport Accidents at Ages 55-64**

Deaths per 100,000

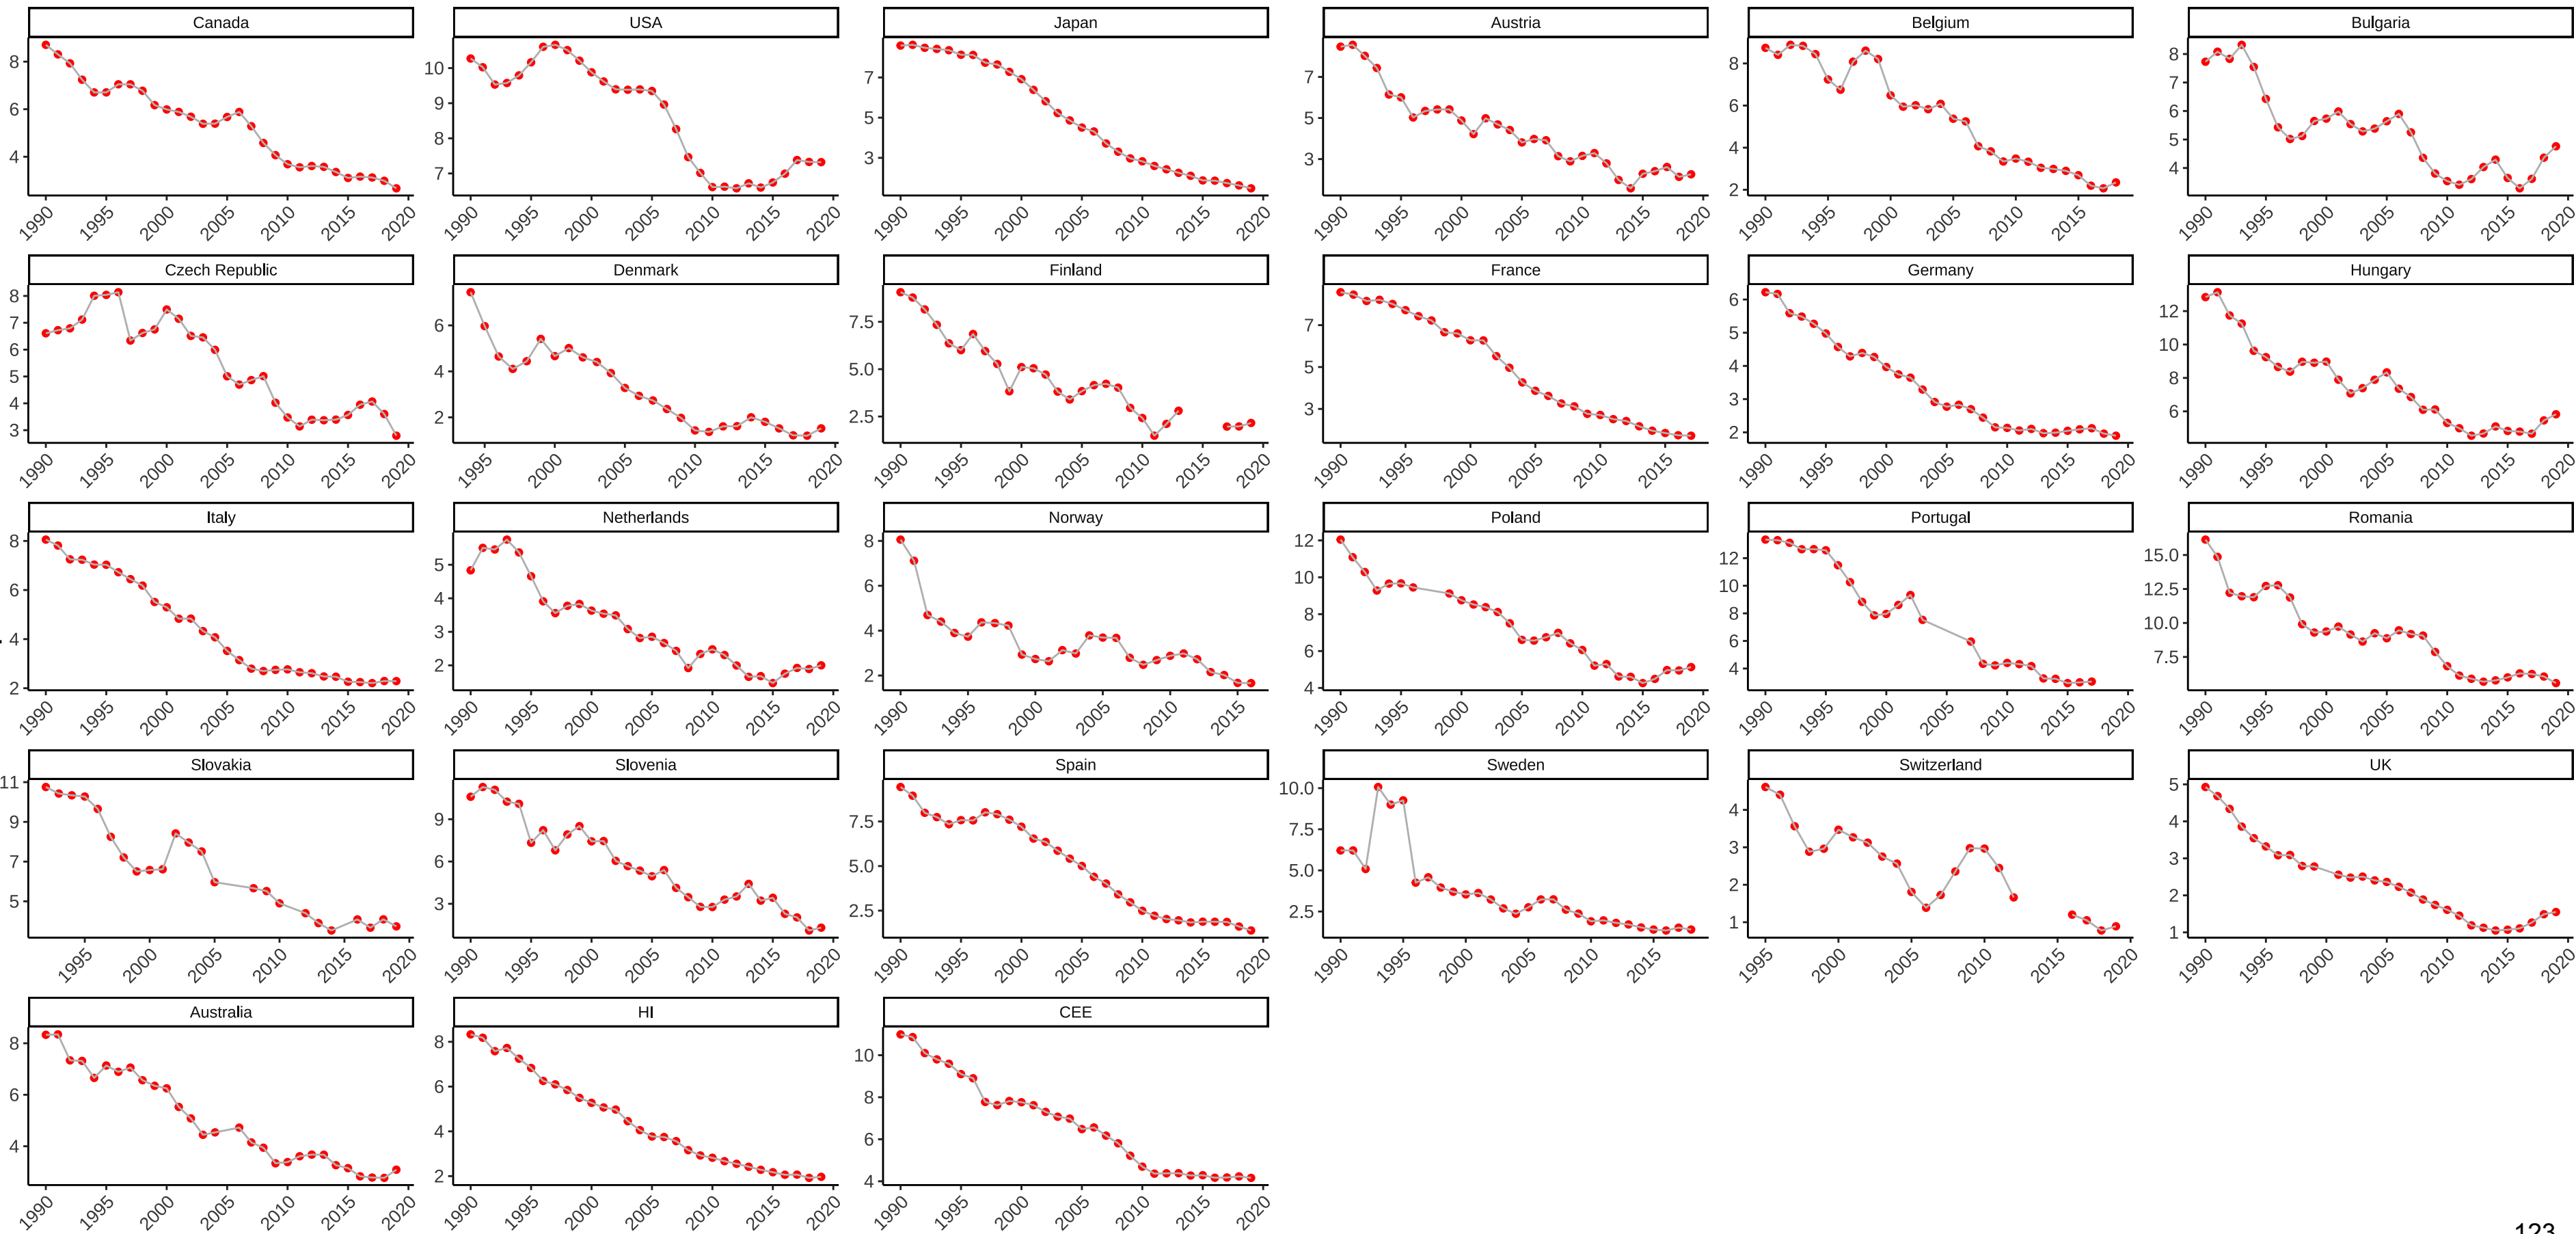

Year

**Figure S117. Three-Year Moving Average of Male Mortality from Other External Causes at Ages 55-64**

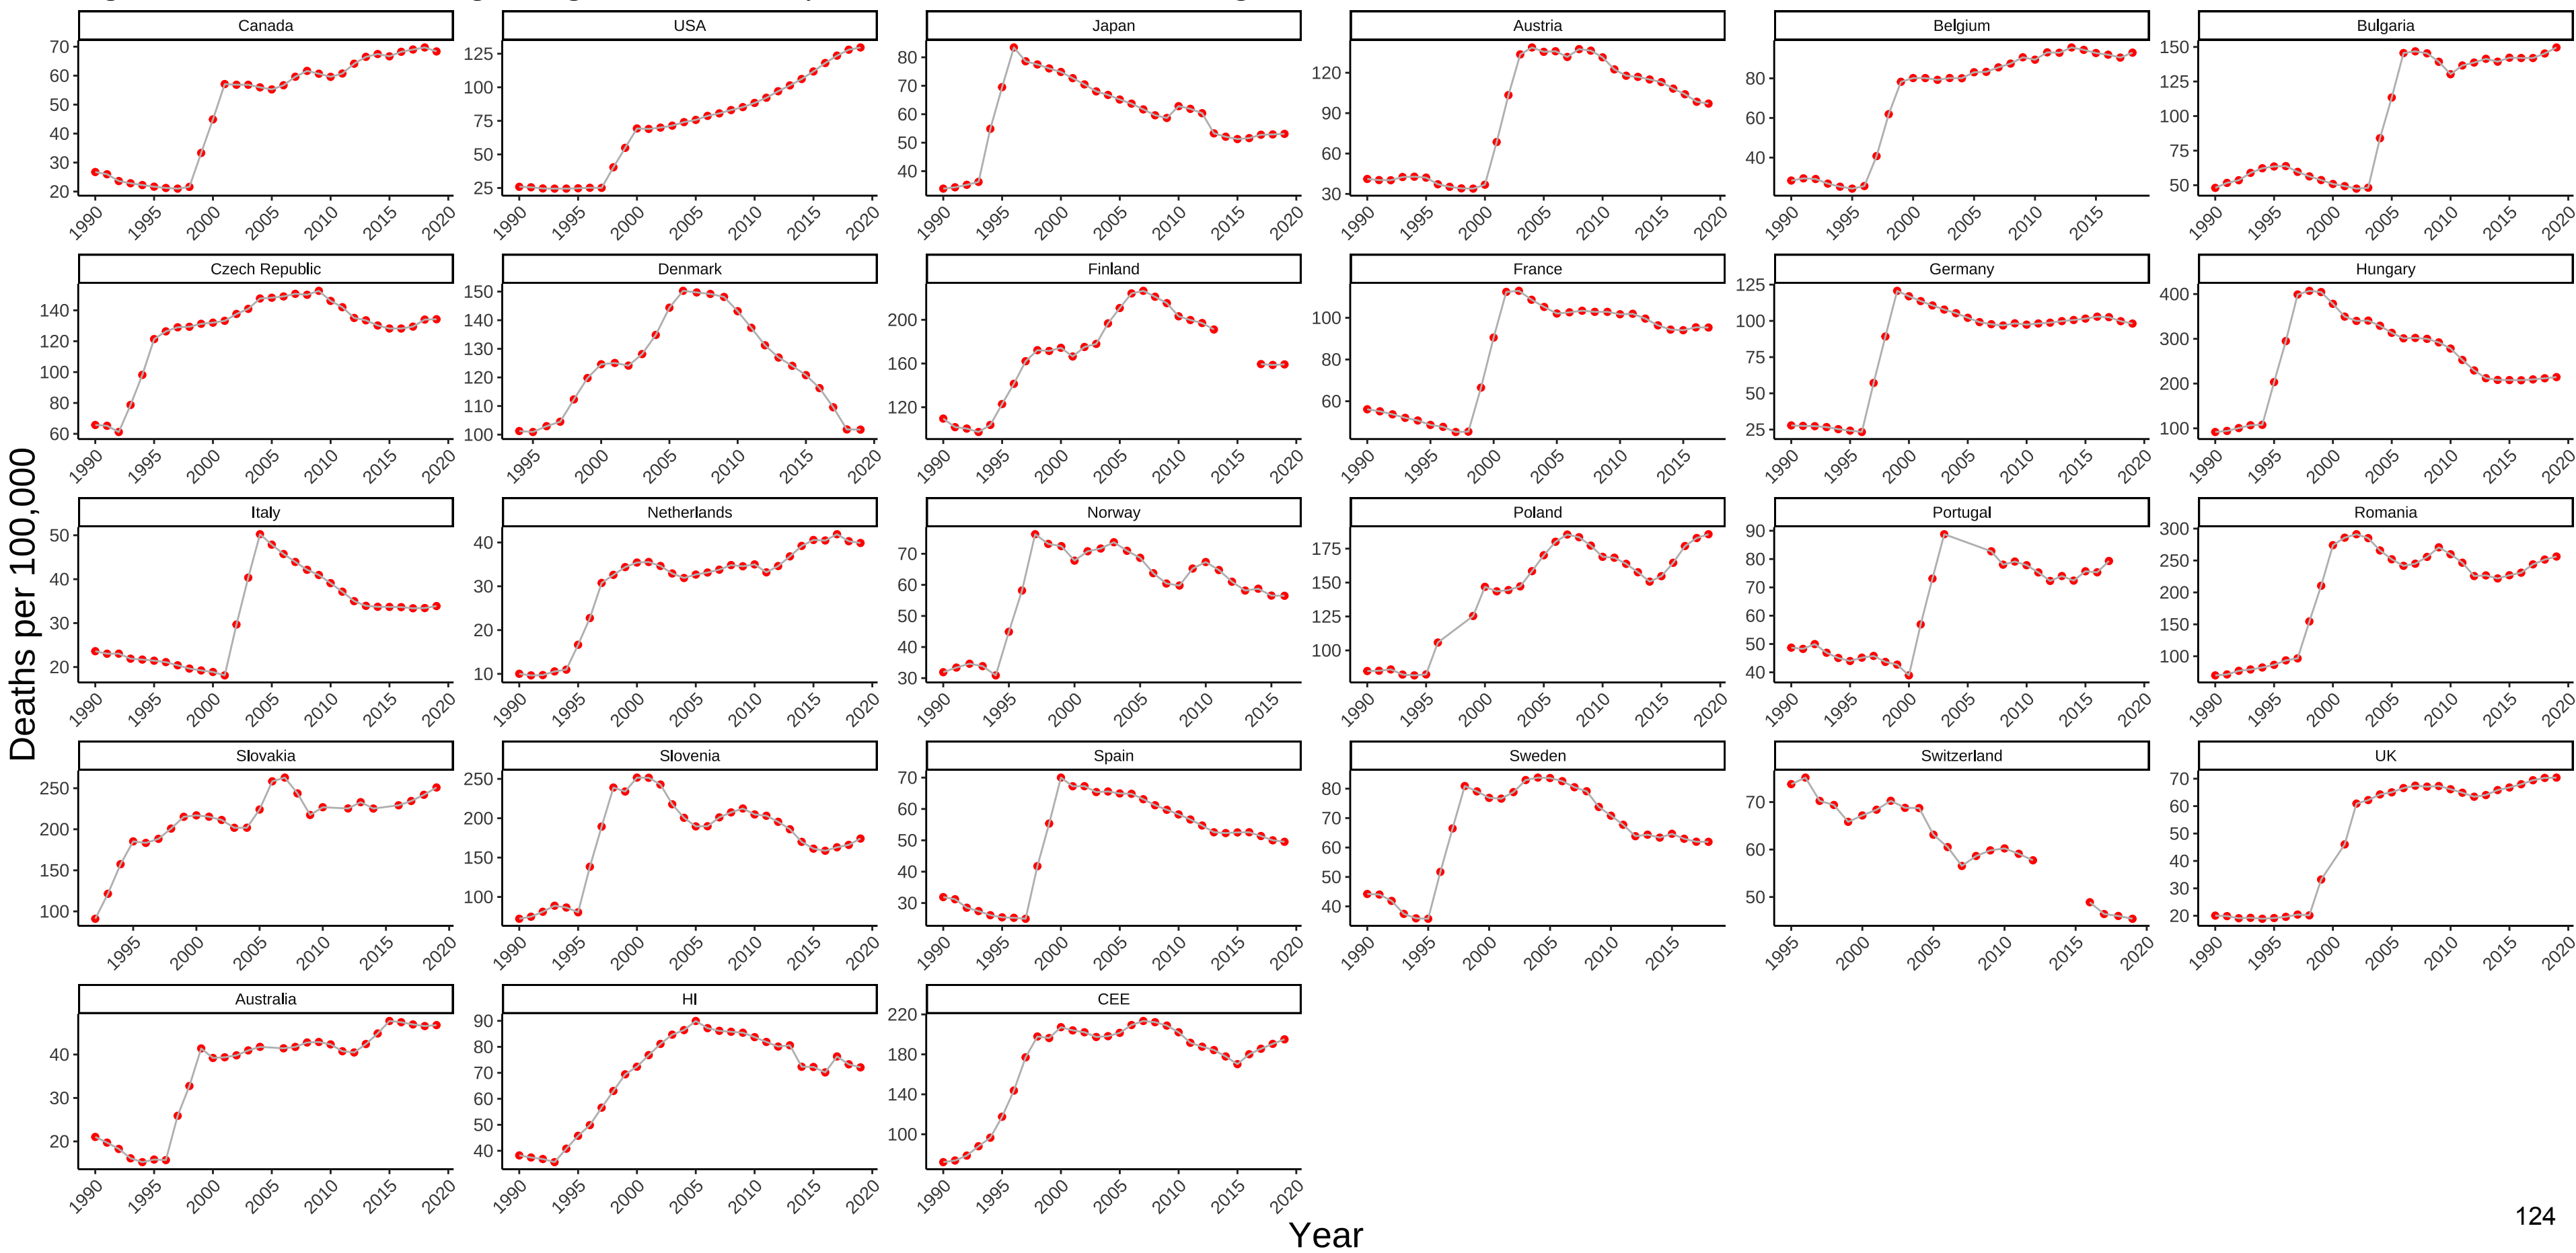

**Figure S118. Three-Year Moving Average of Female Mortality from Other External Causes at Ages 55-64**

Deaths per 100,000

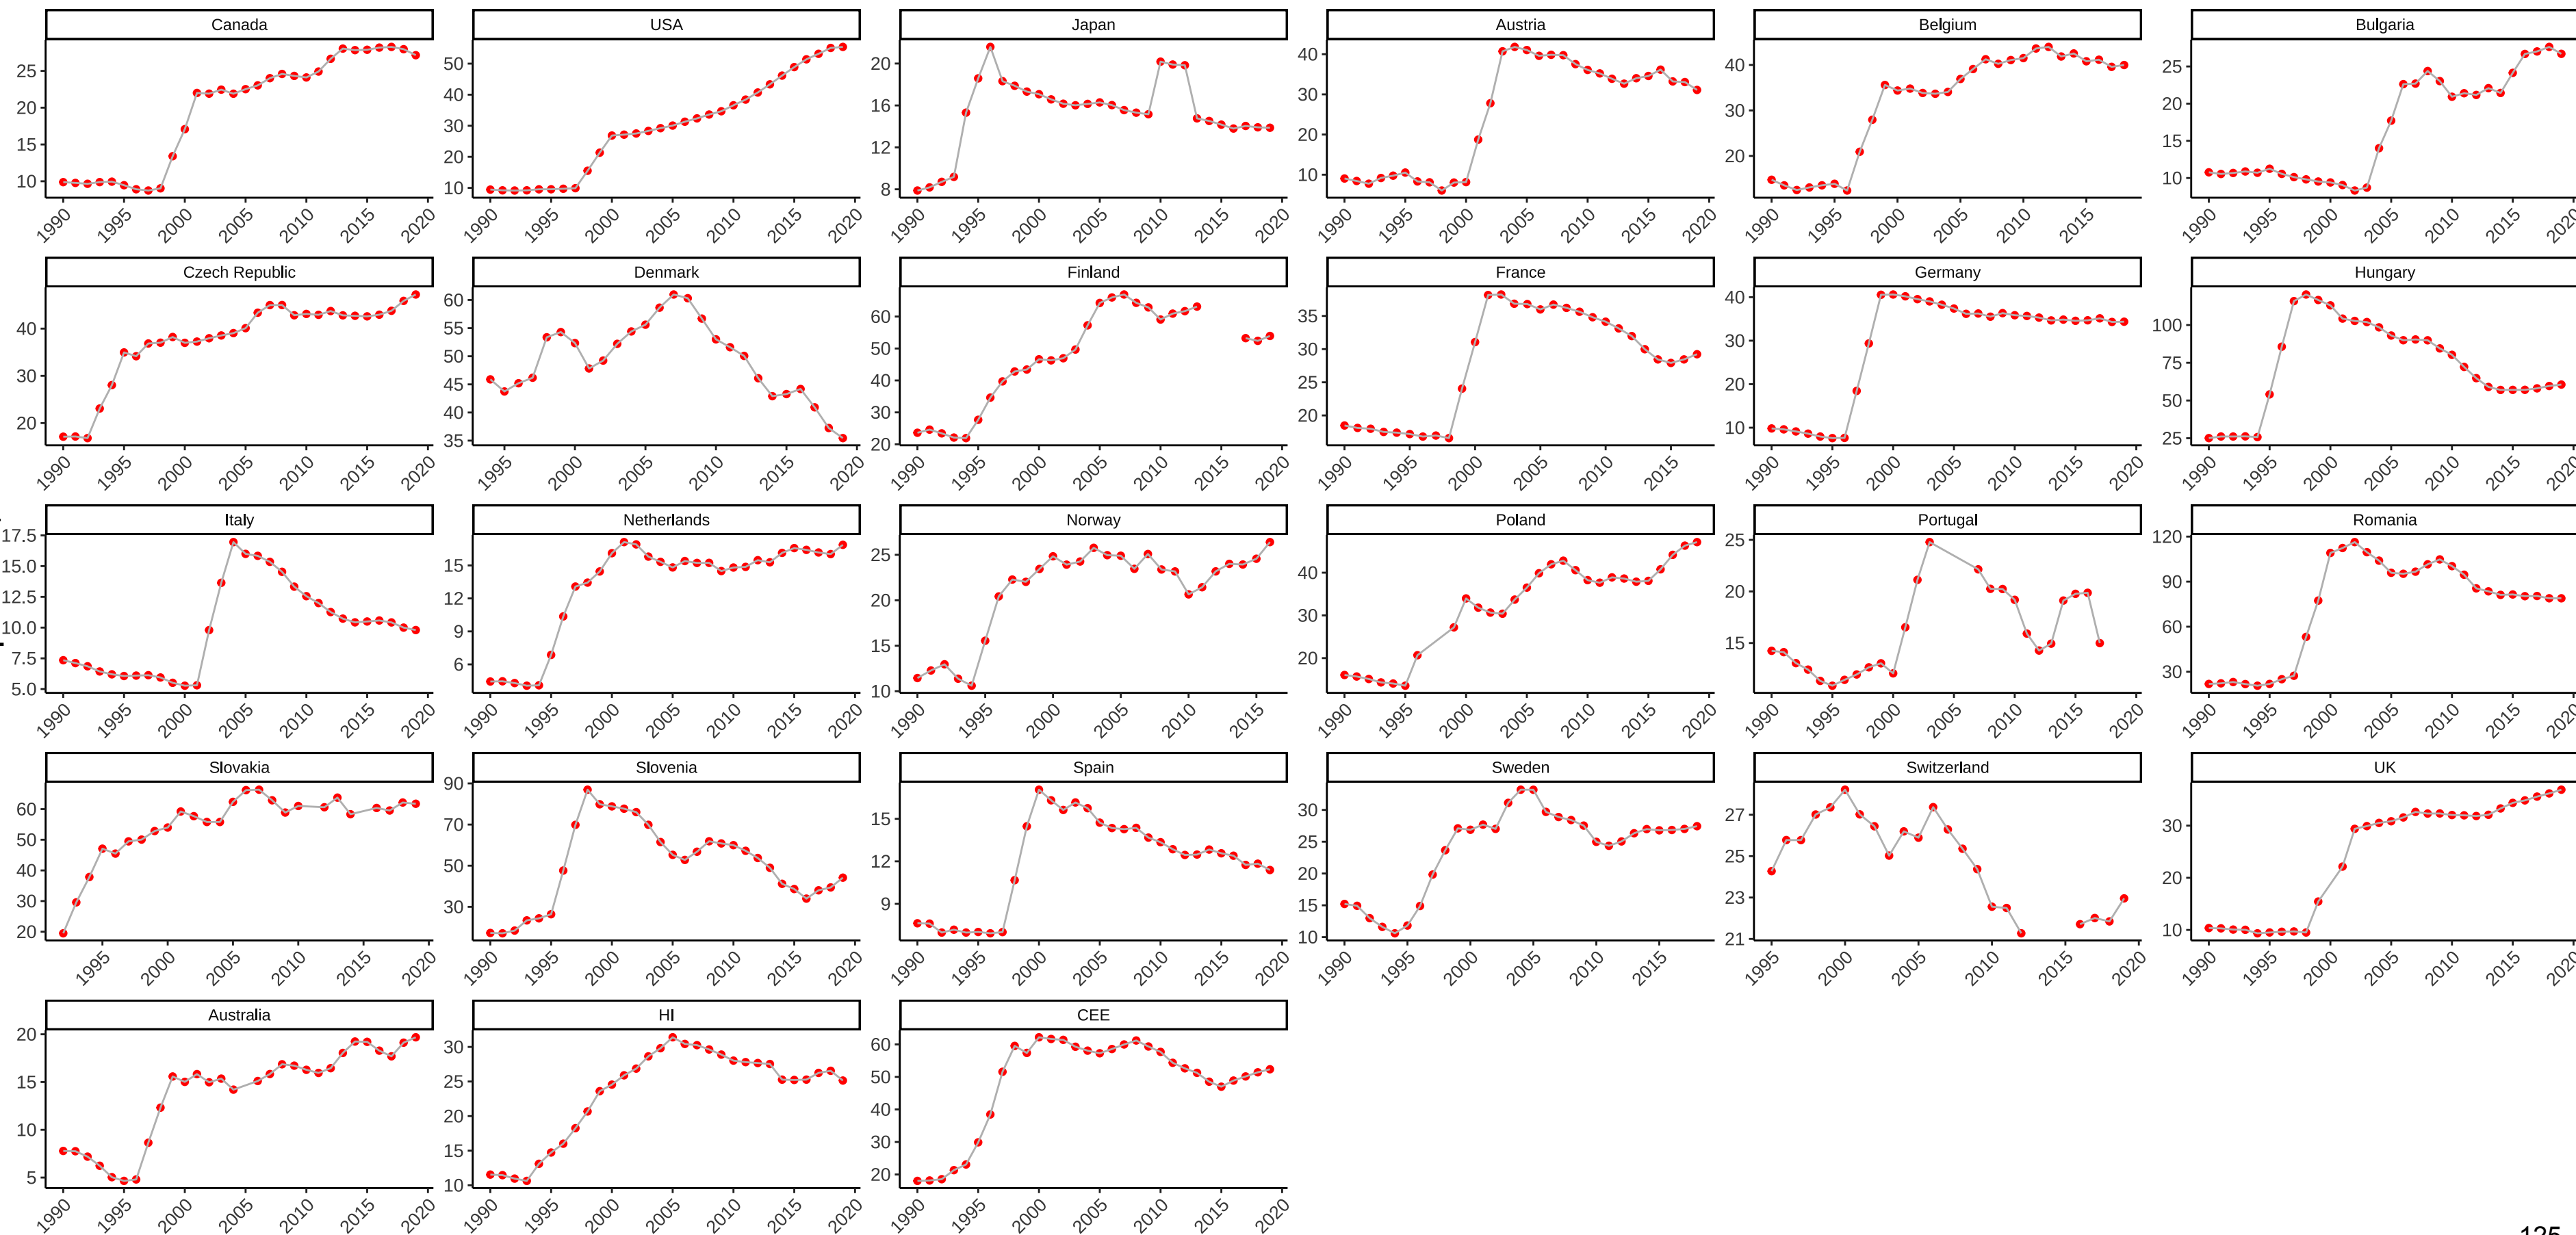

Year

**Figure S119. Three-Year Moving Average of Male Mortality from All Other Causes at Ages 55-64**

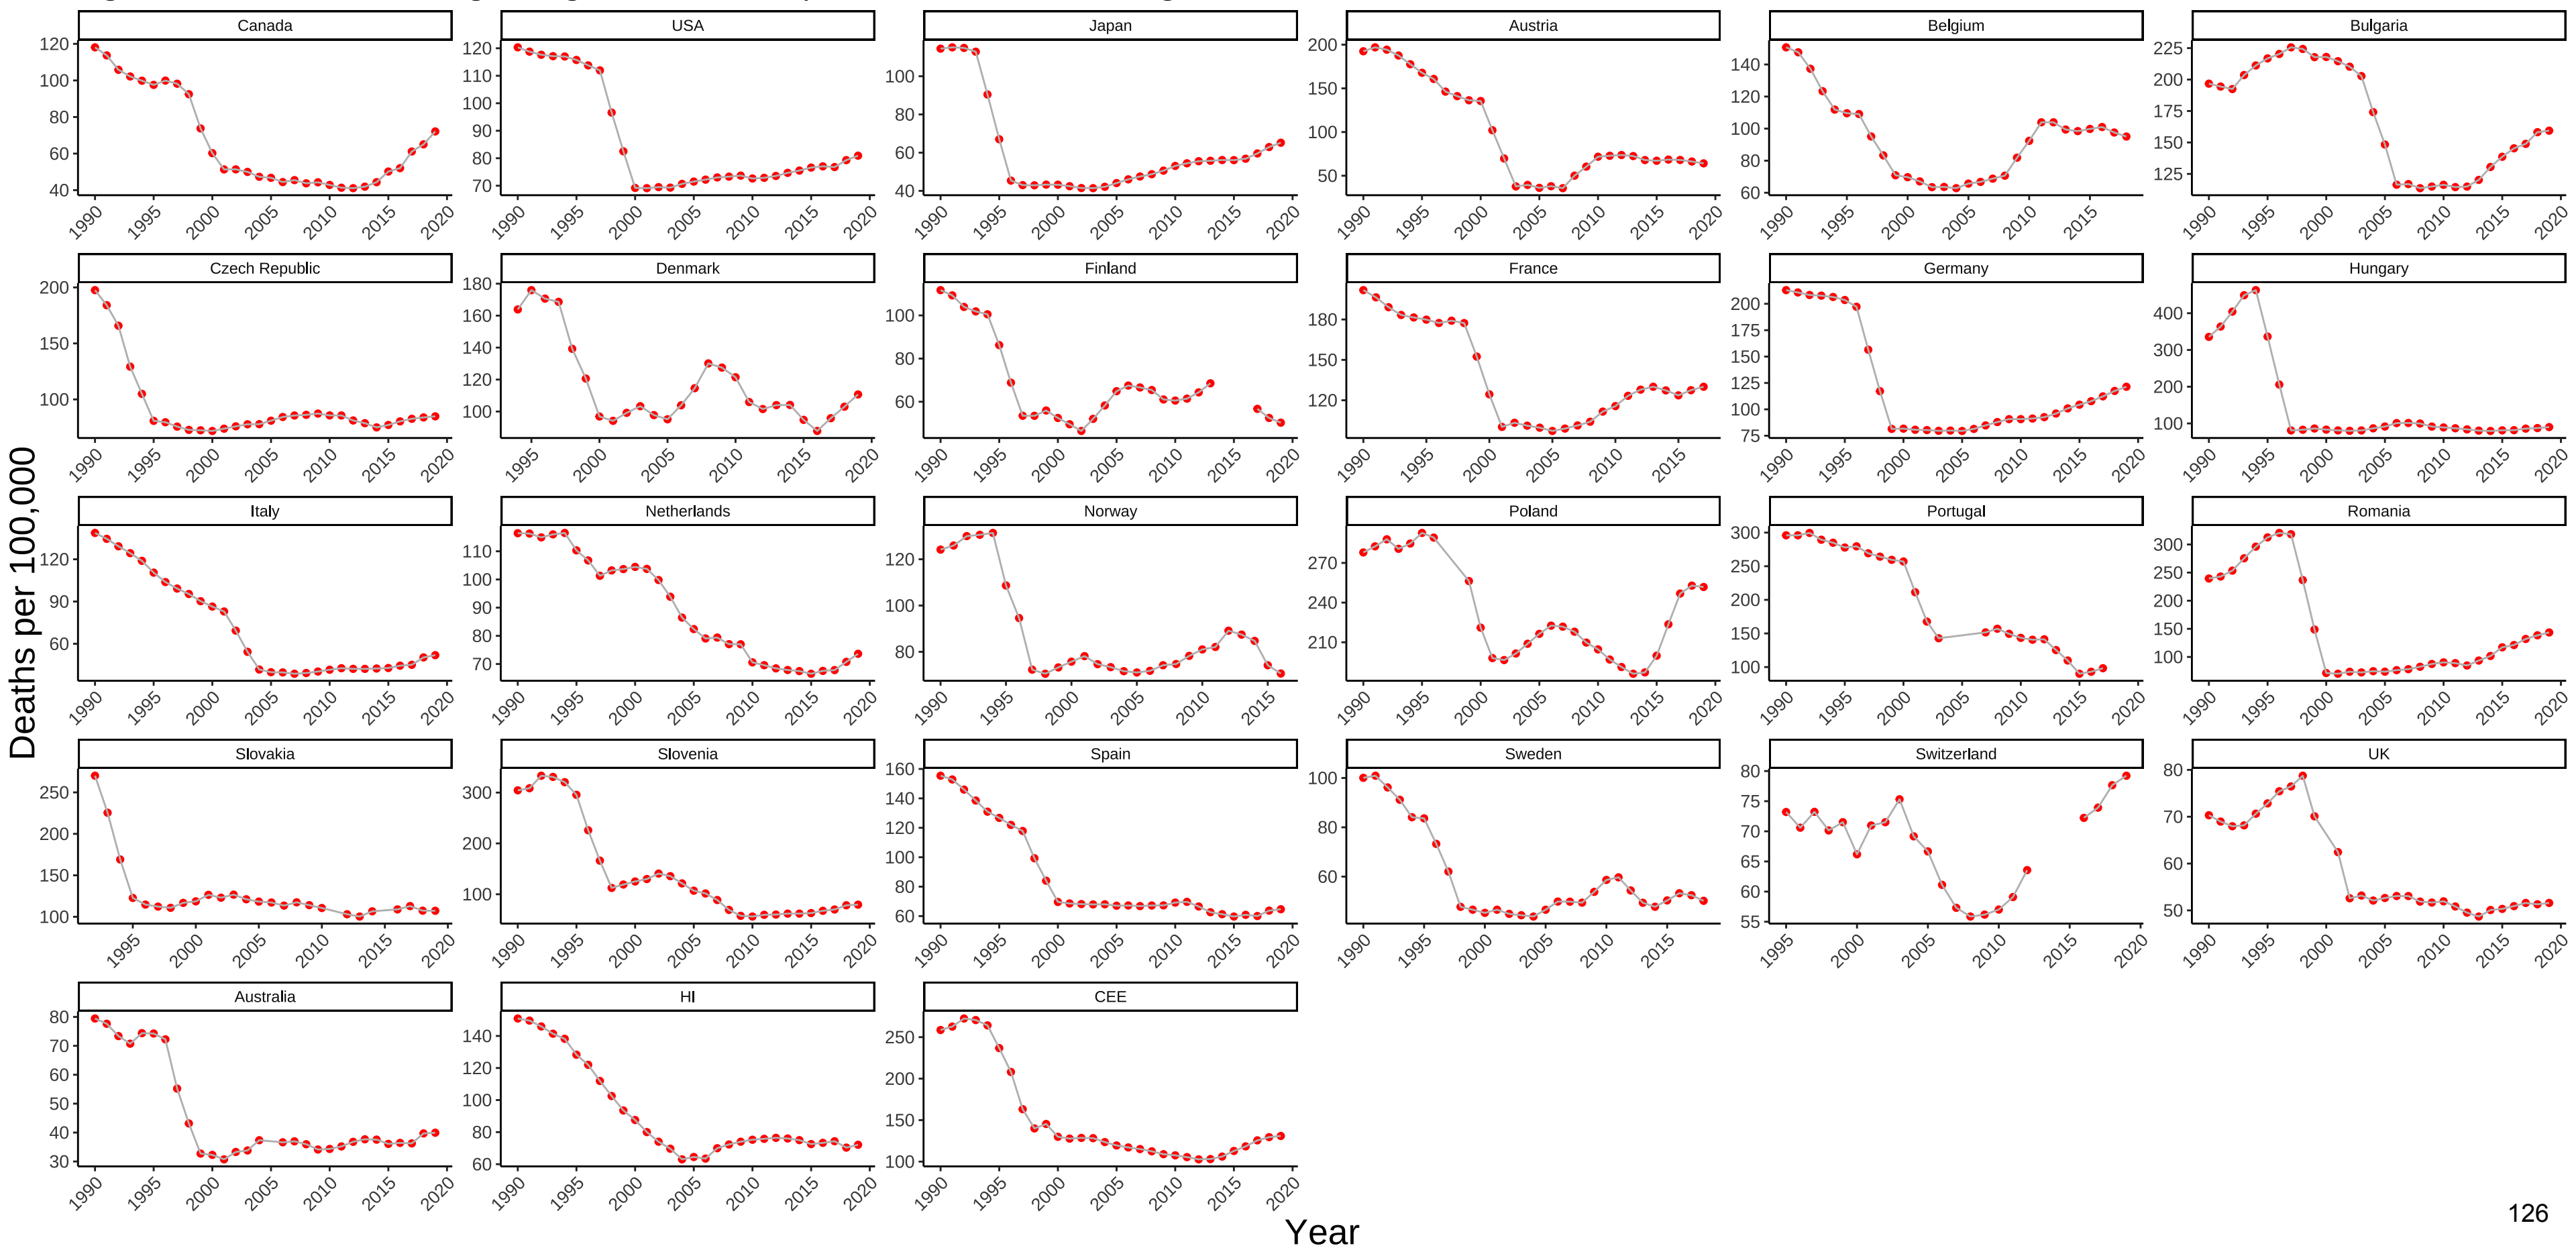

**Figure S120. Three-Year Moving Average of Female Mortality from All Other Causes at Ages 55-64**

Deaths per 100,000

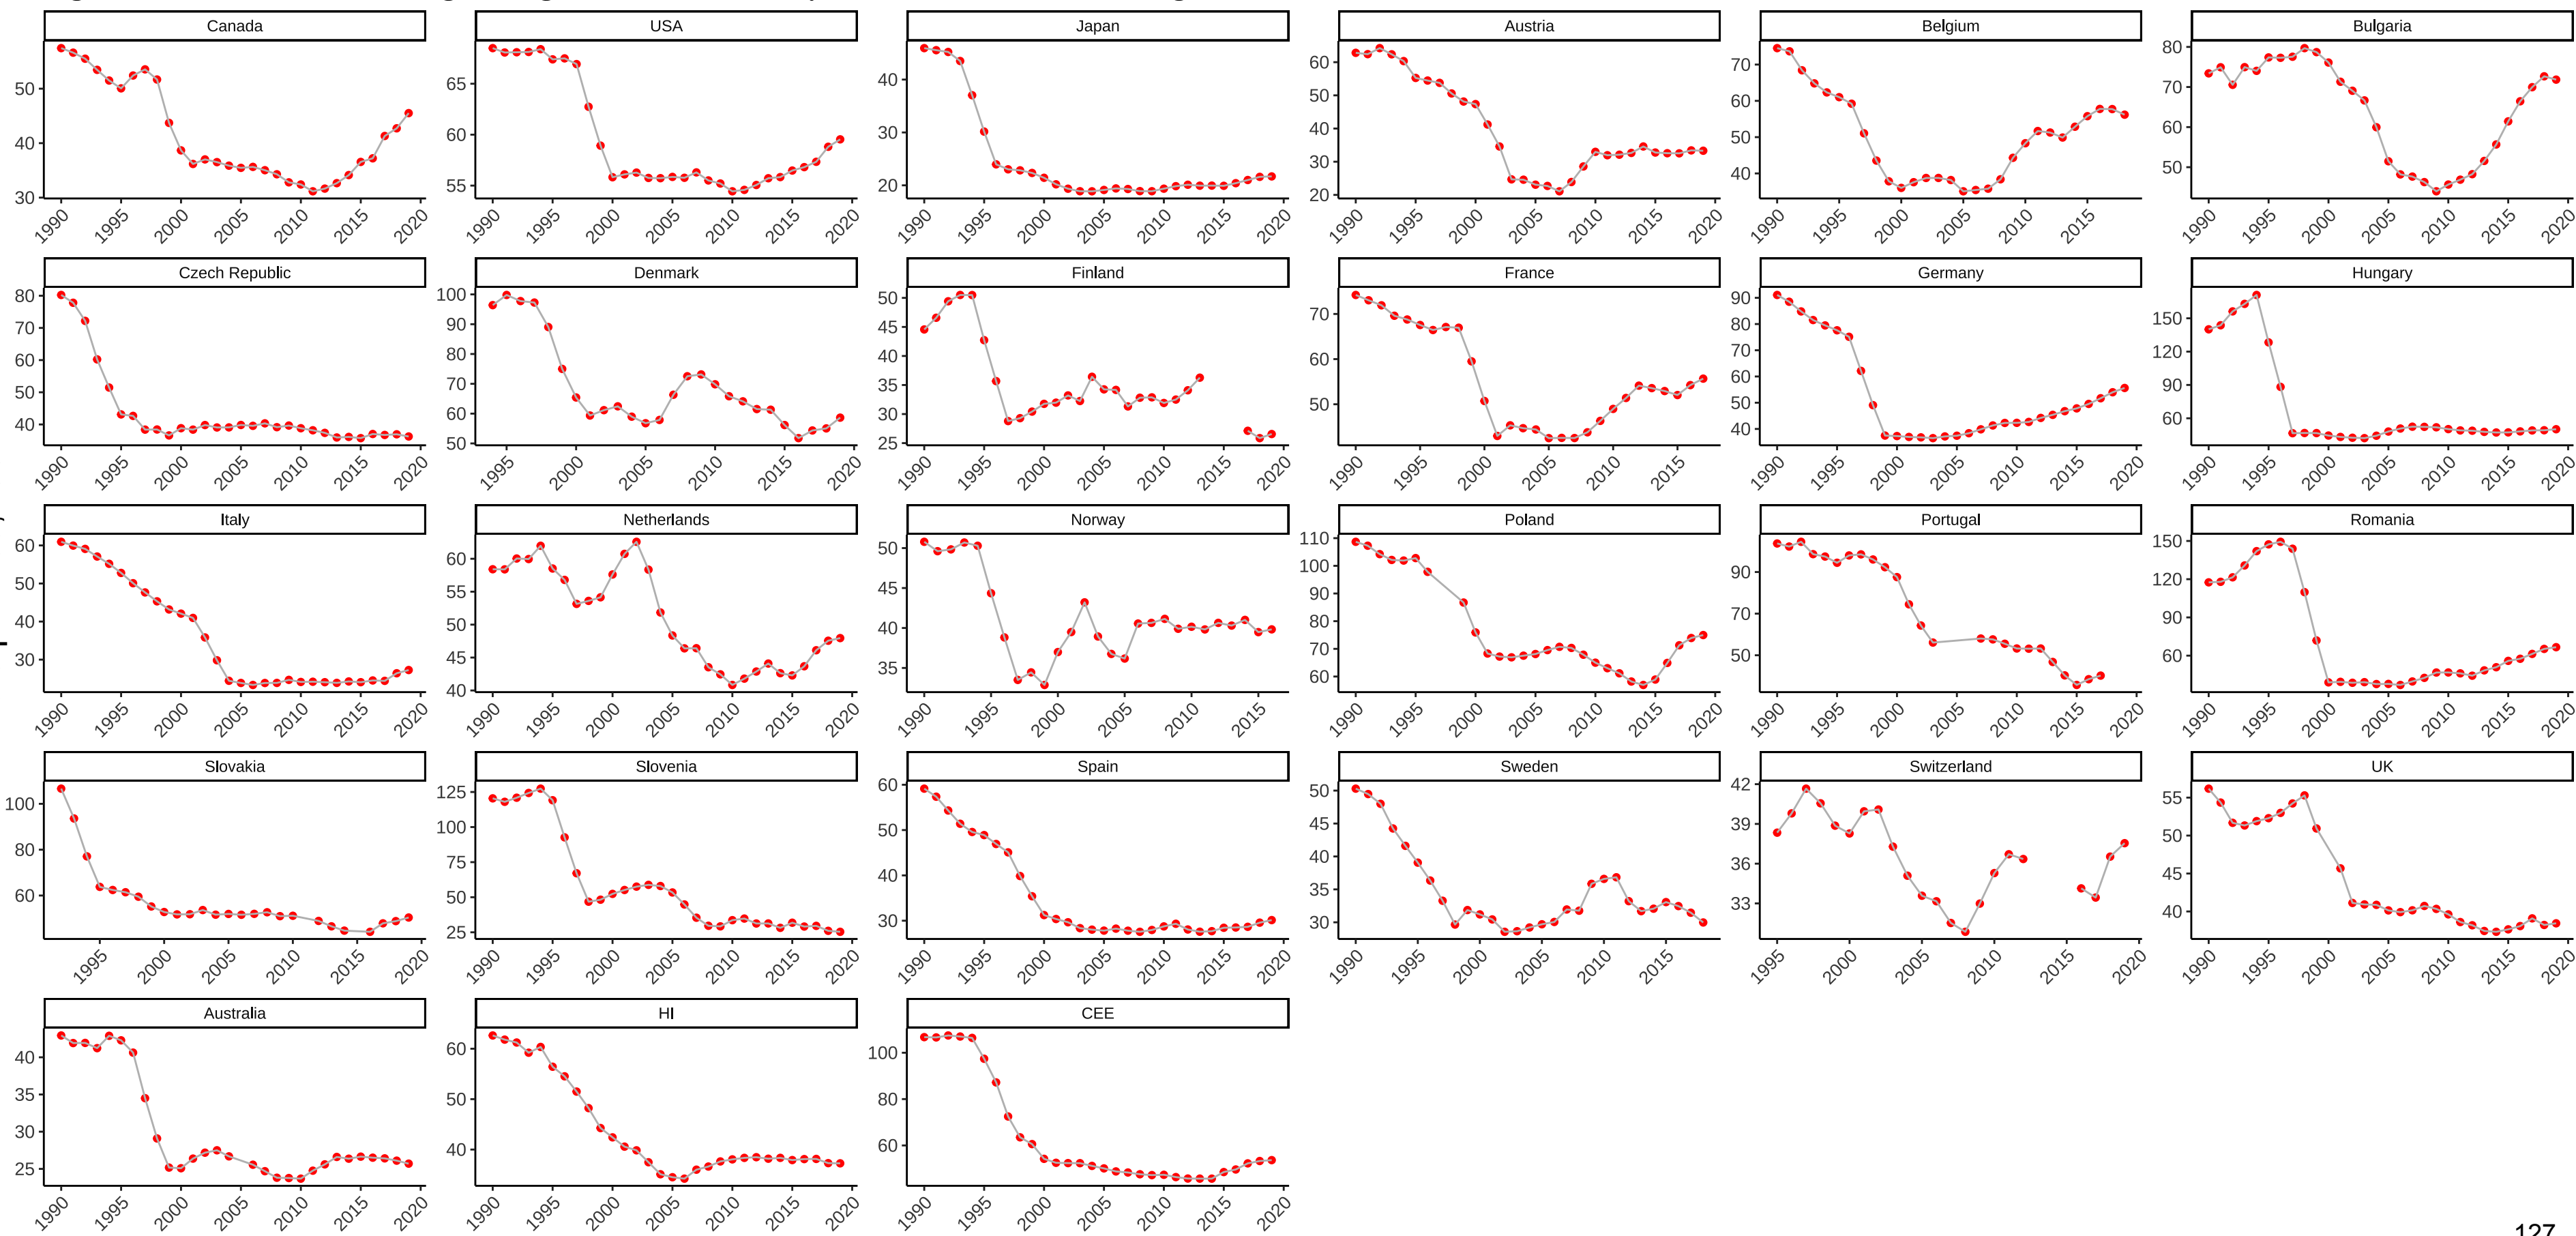

Year

**Figure S121. Three-Year Moving Average of Male Mortality from All Causes at Ages 55-64**

Deaths per 100,000

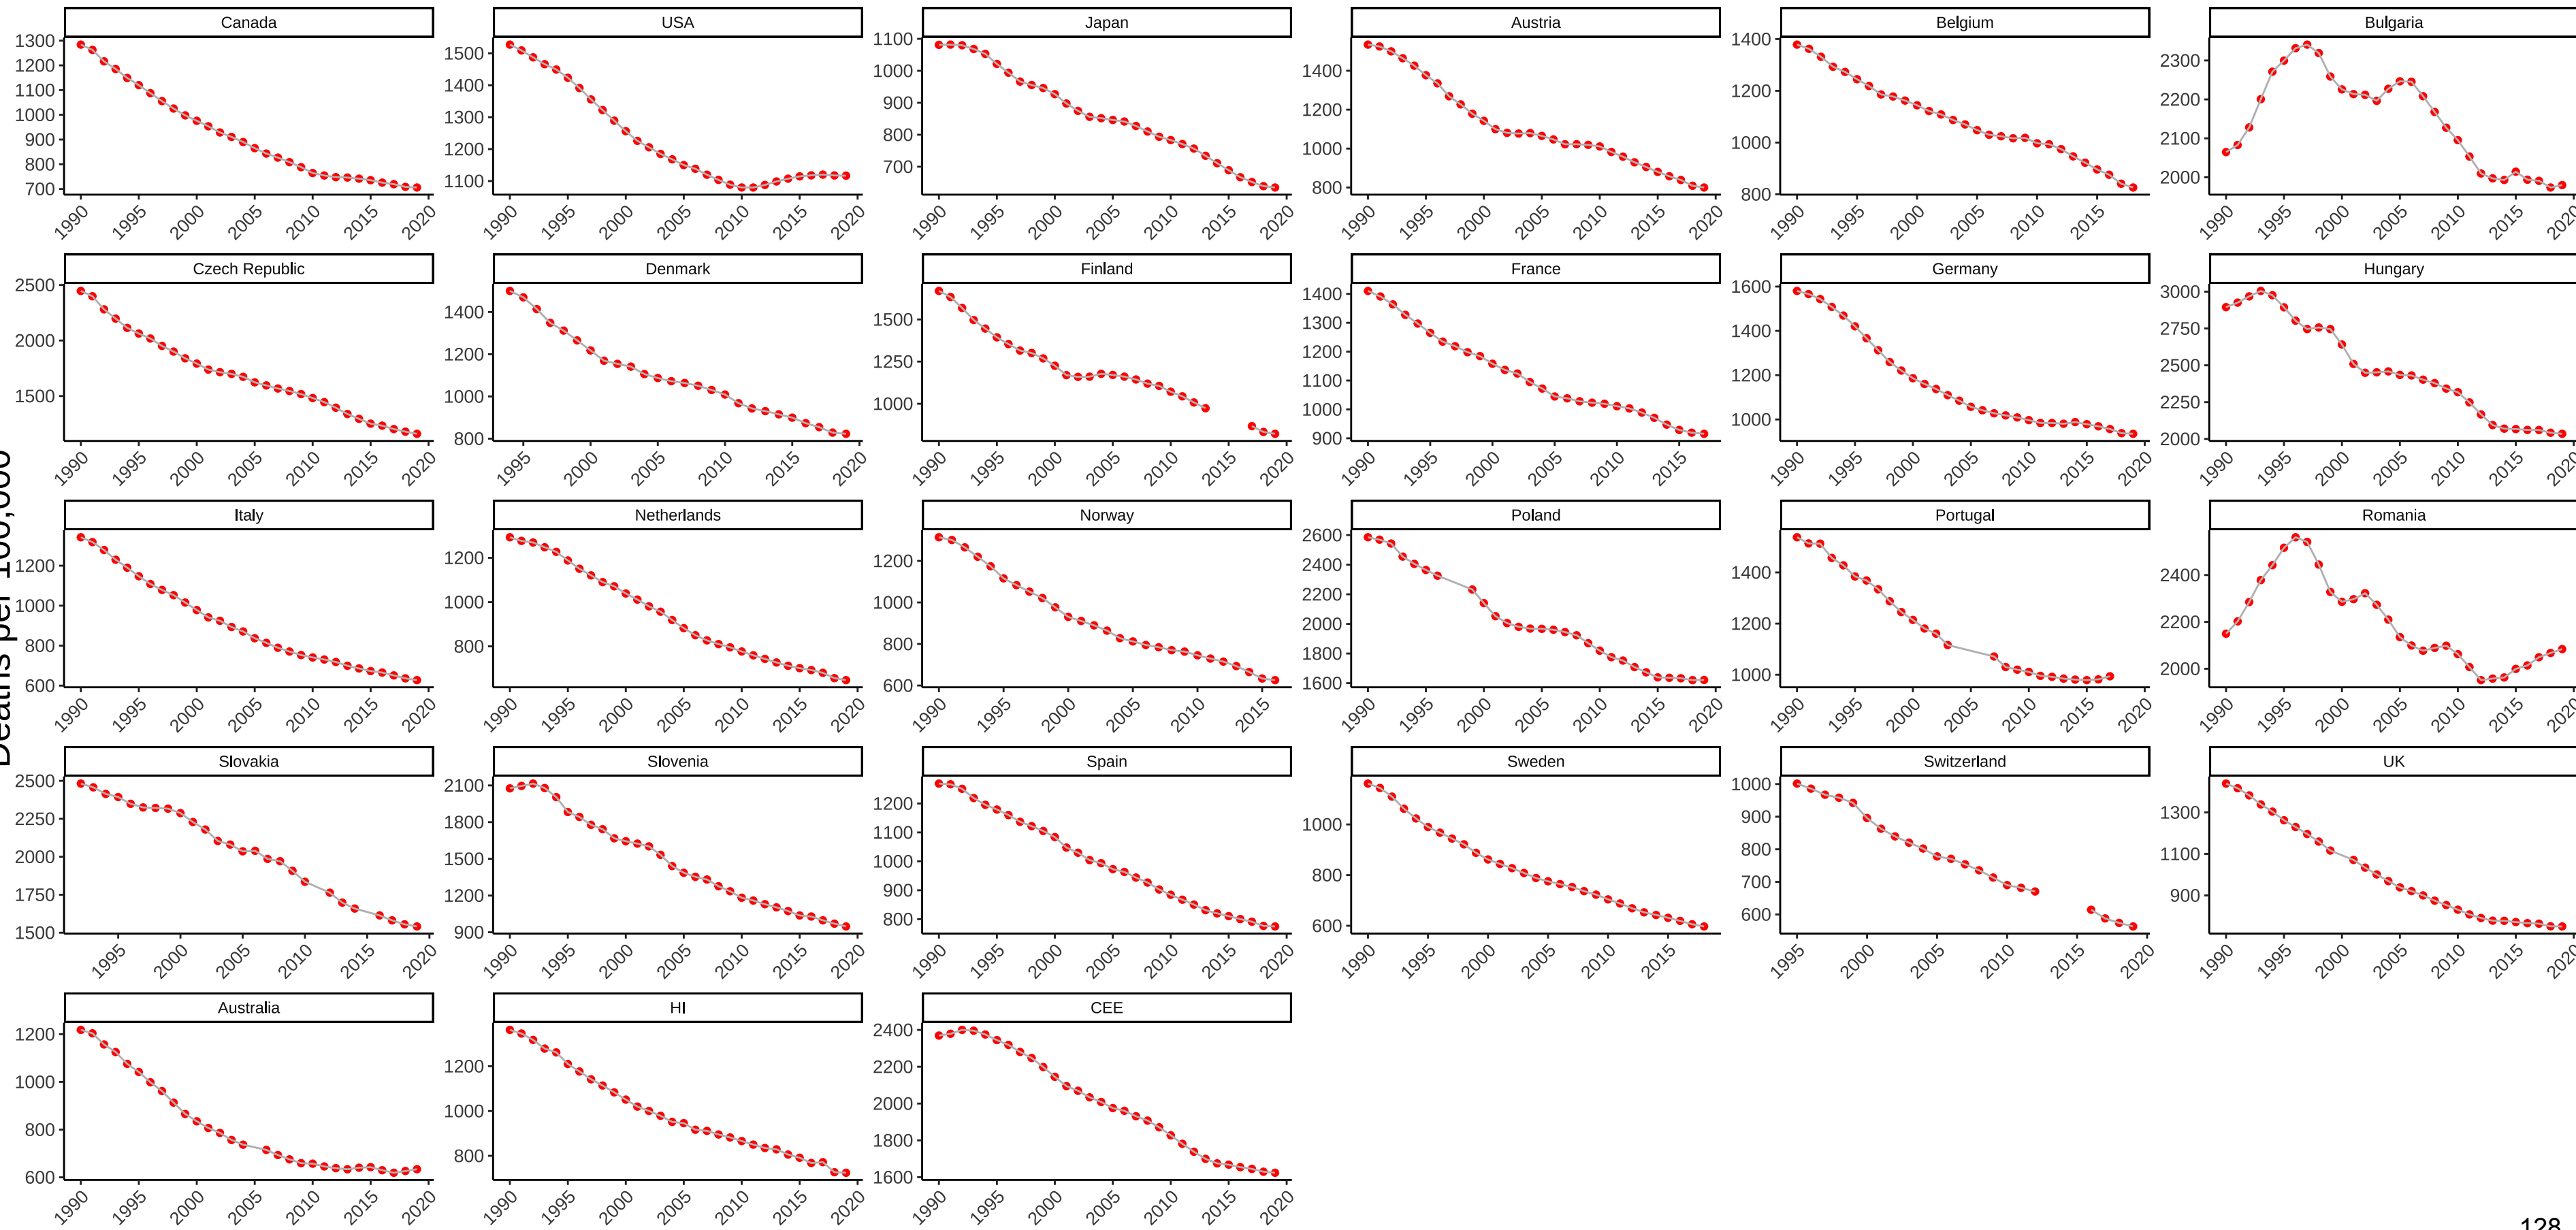

Year

**Figure S122. Three-Year Moving Average of Female Mortality from All Causes at Ages 55-64**

Deaths per 100,000

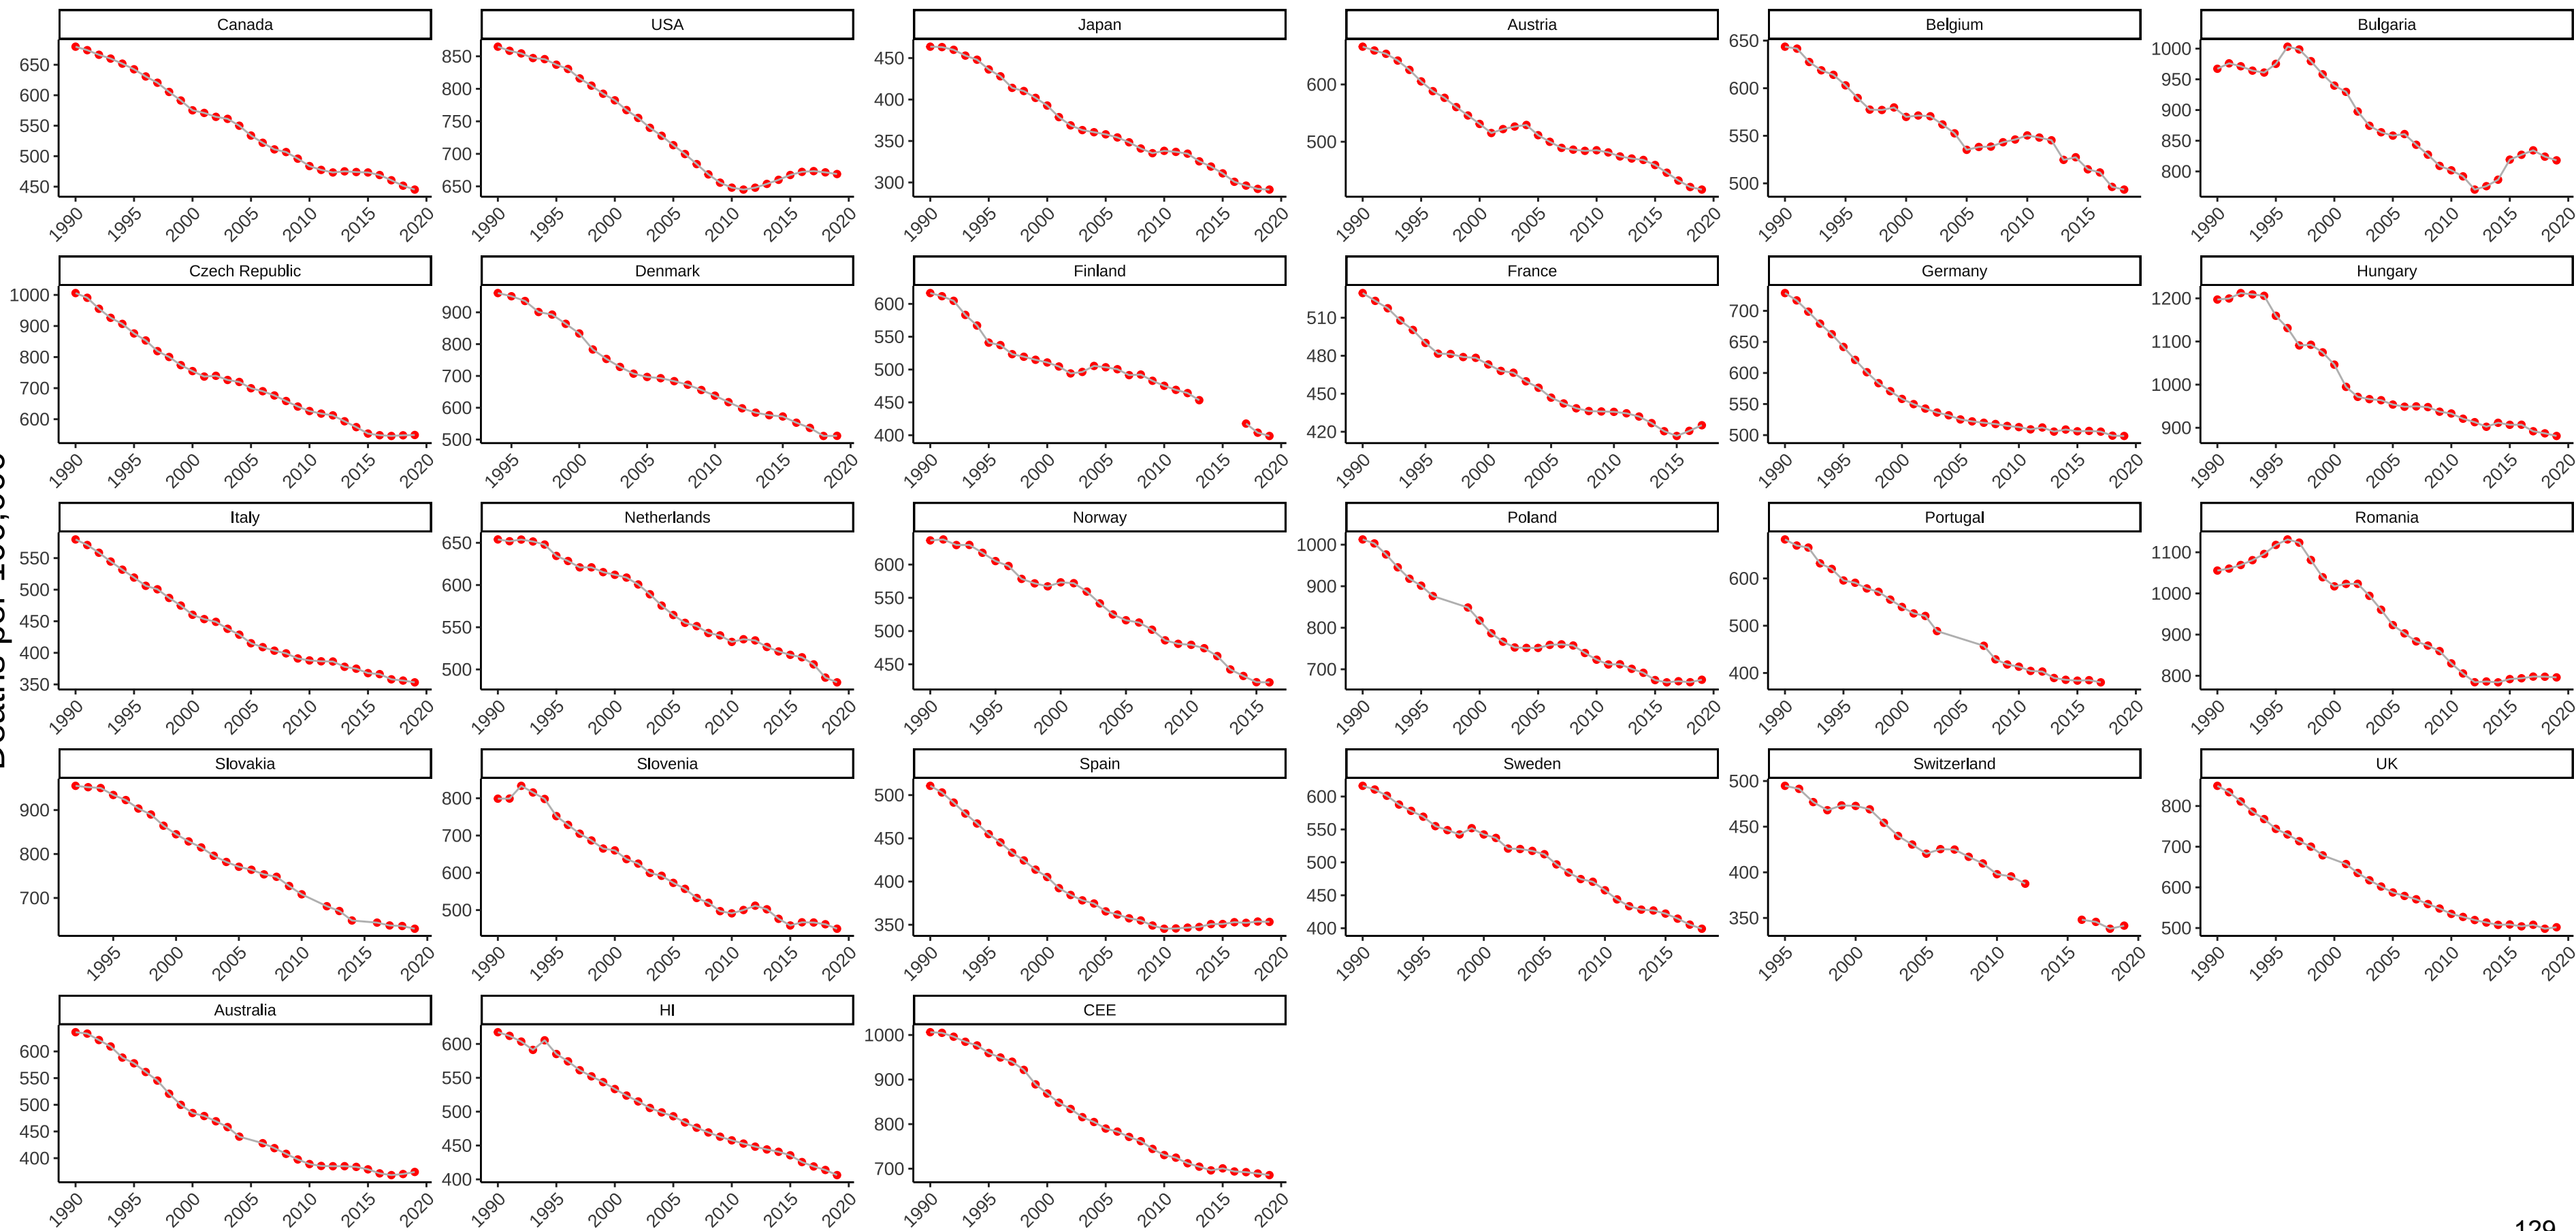

Year

**Figure S123. Three-Year Moving Average of Male Mortality from Drug-Related Causes at Ages 25-44**

Deaths per 100,000

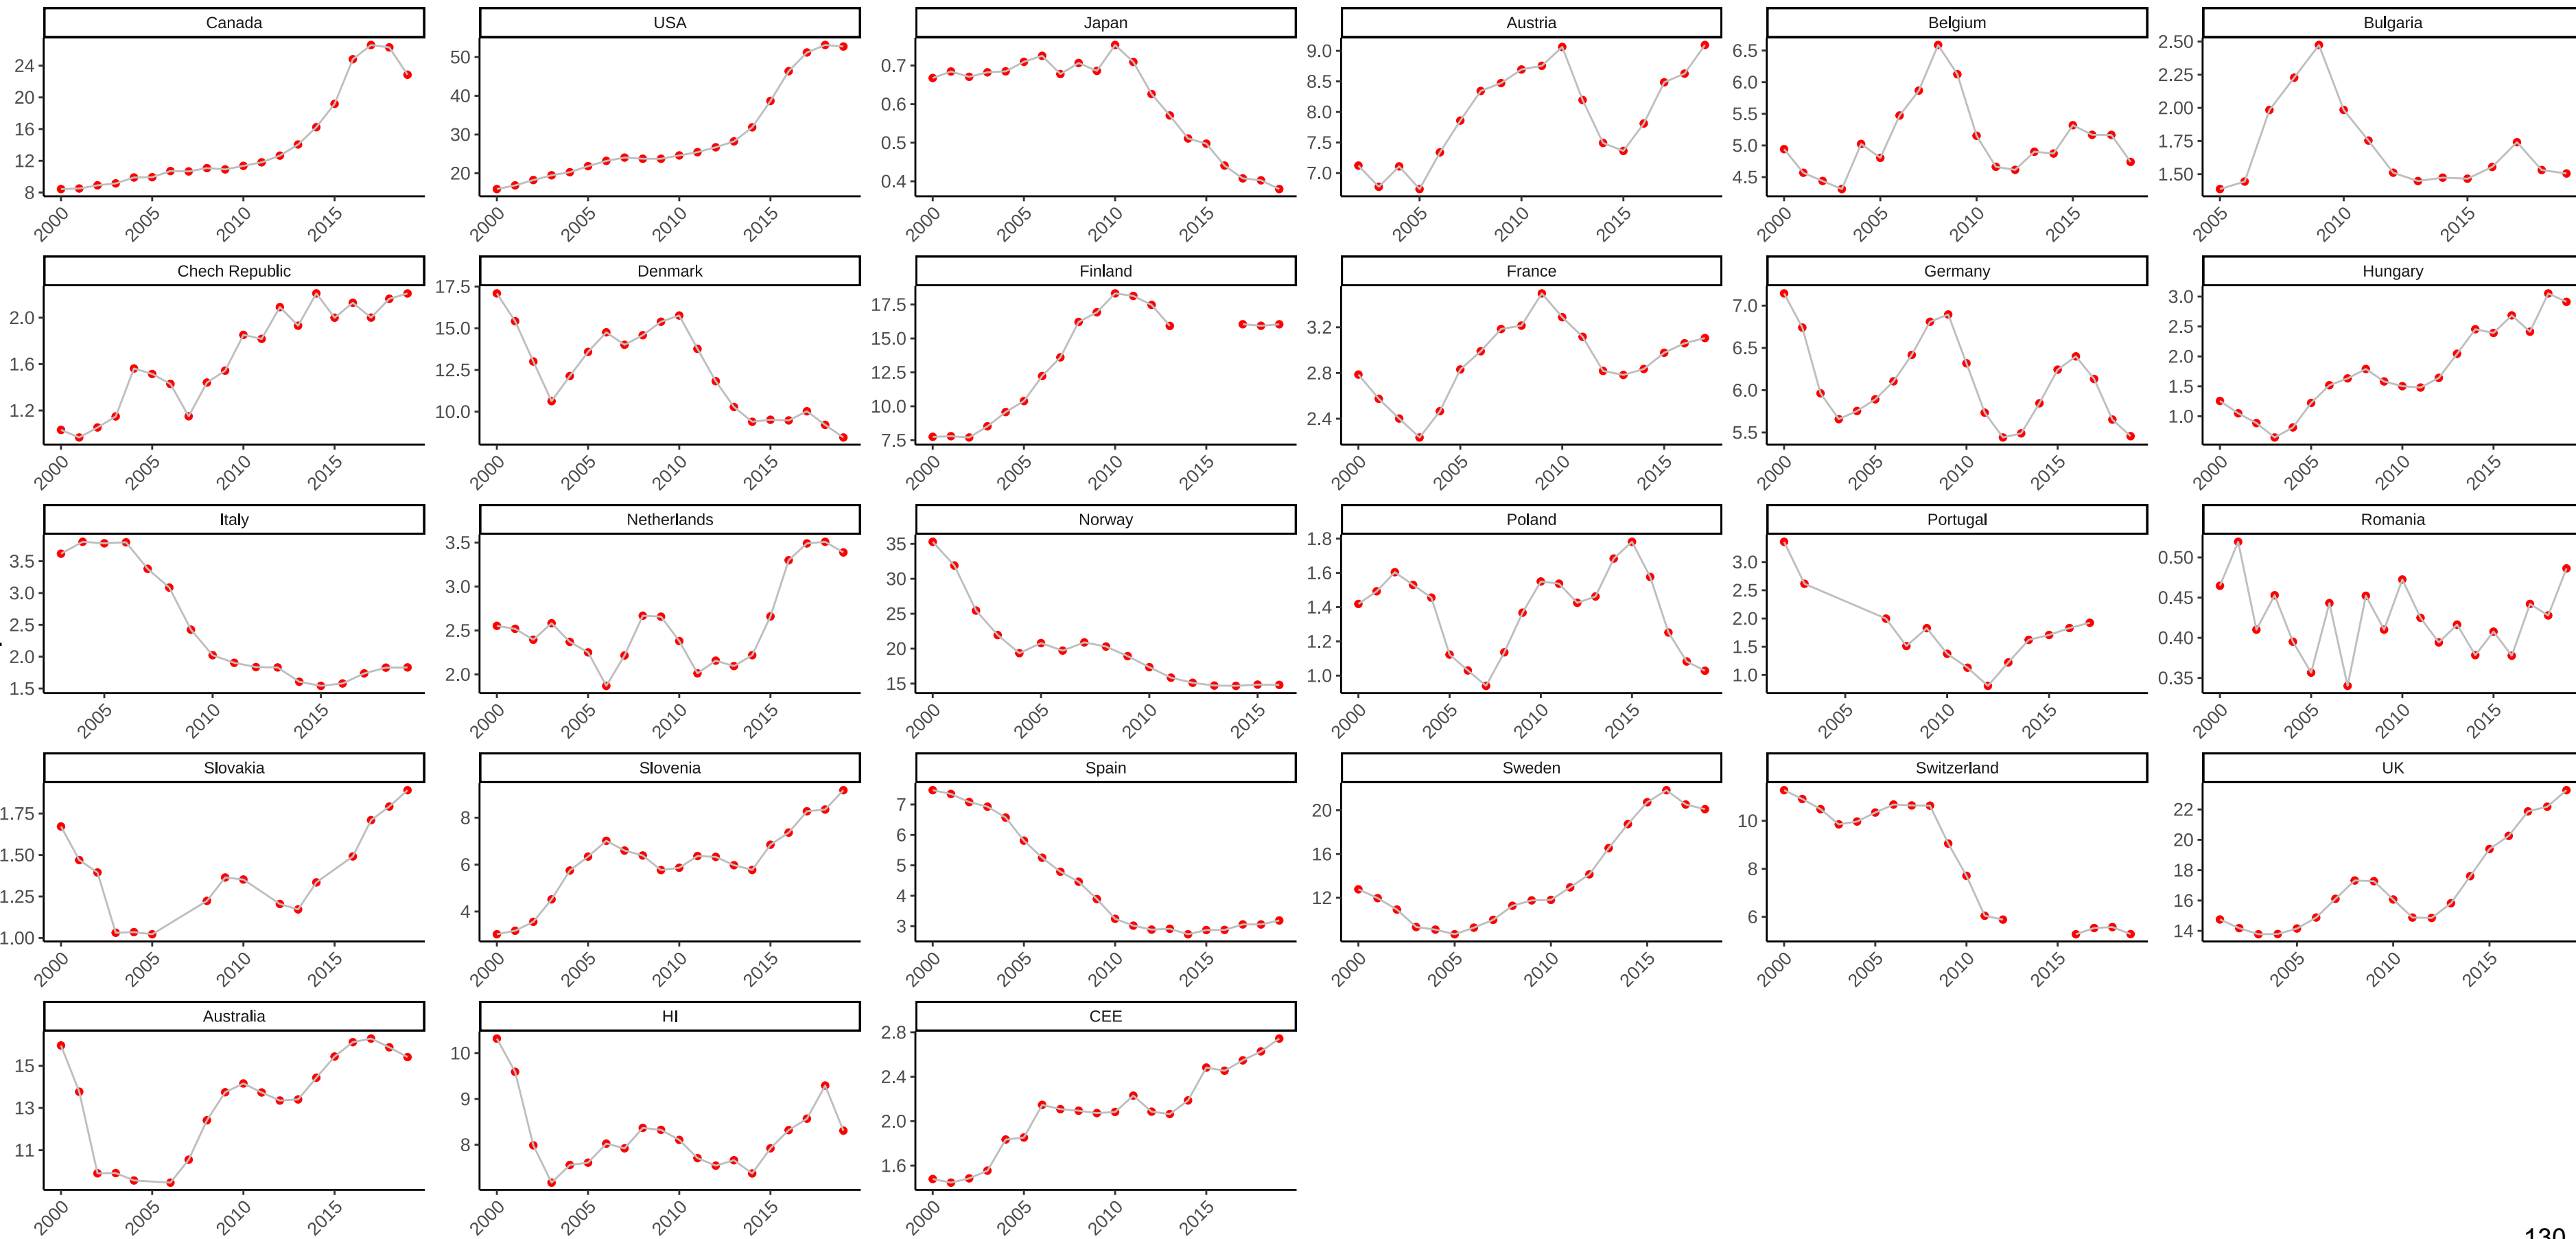

Year

**Figure S124. Three-Year Moving Average of Female Mortality from Drug-Related Causes at Ages 25-44**

Deaths per 100,000

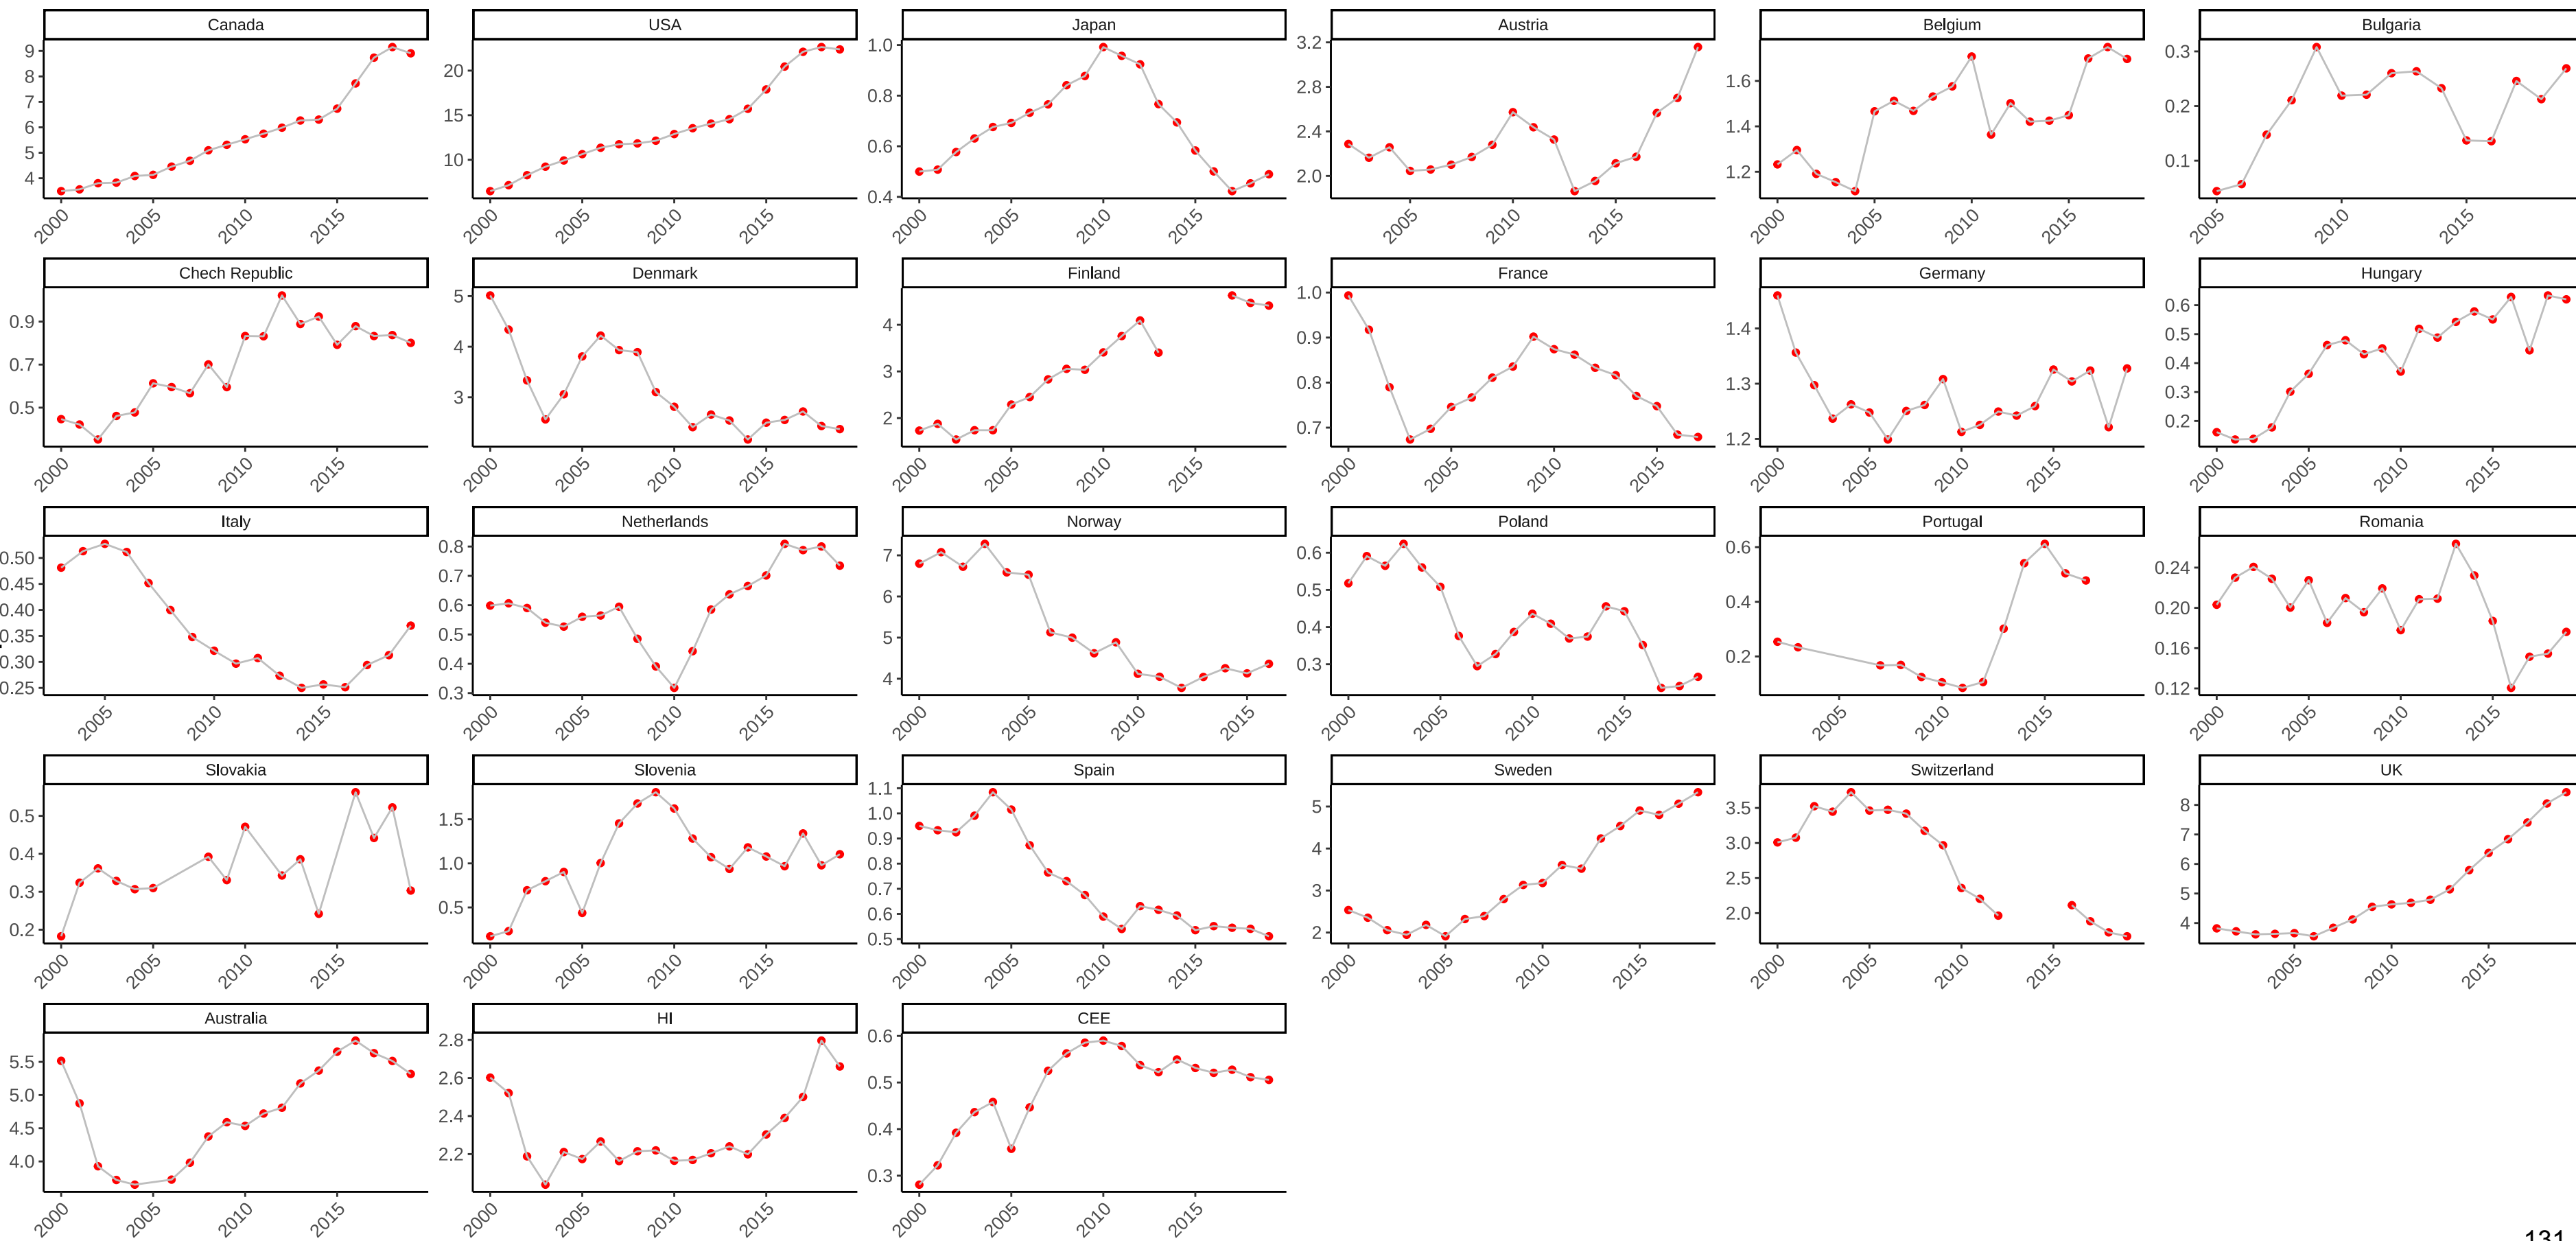

**Figure S125. Three-Year Moving Average of Male Mortality from Alcohol-Related Causes at Ages 25-44**

Deaths per 100,000

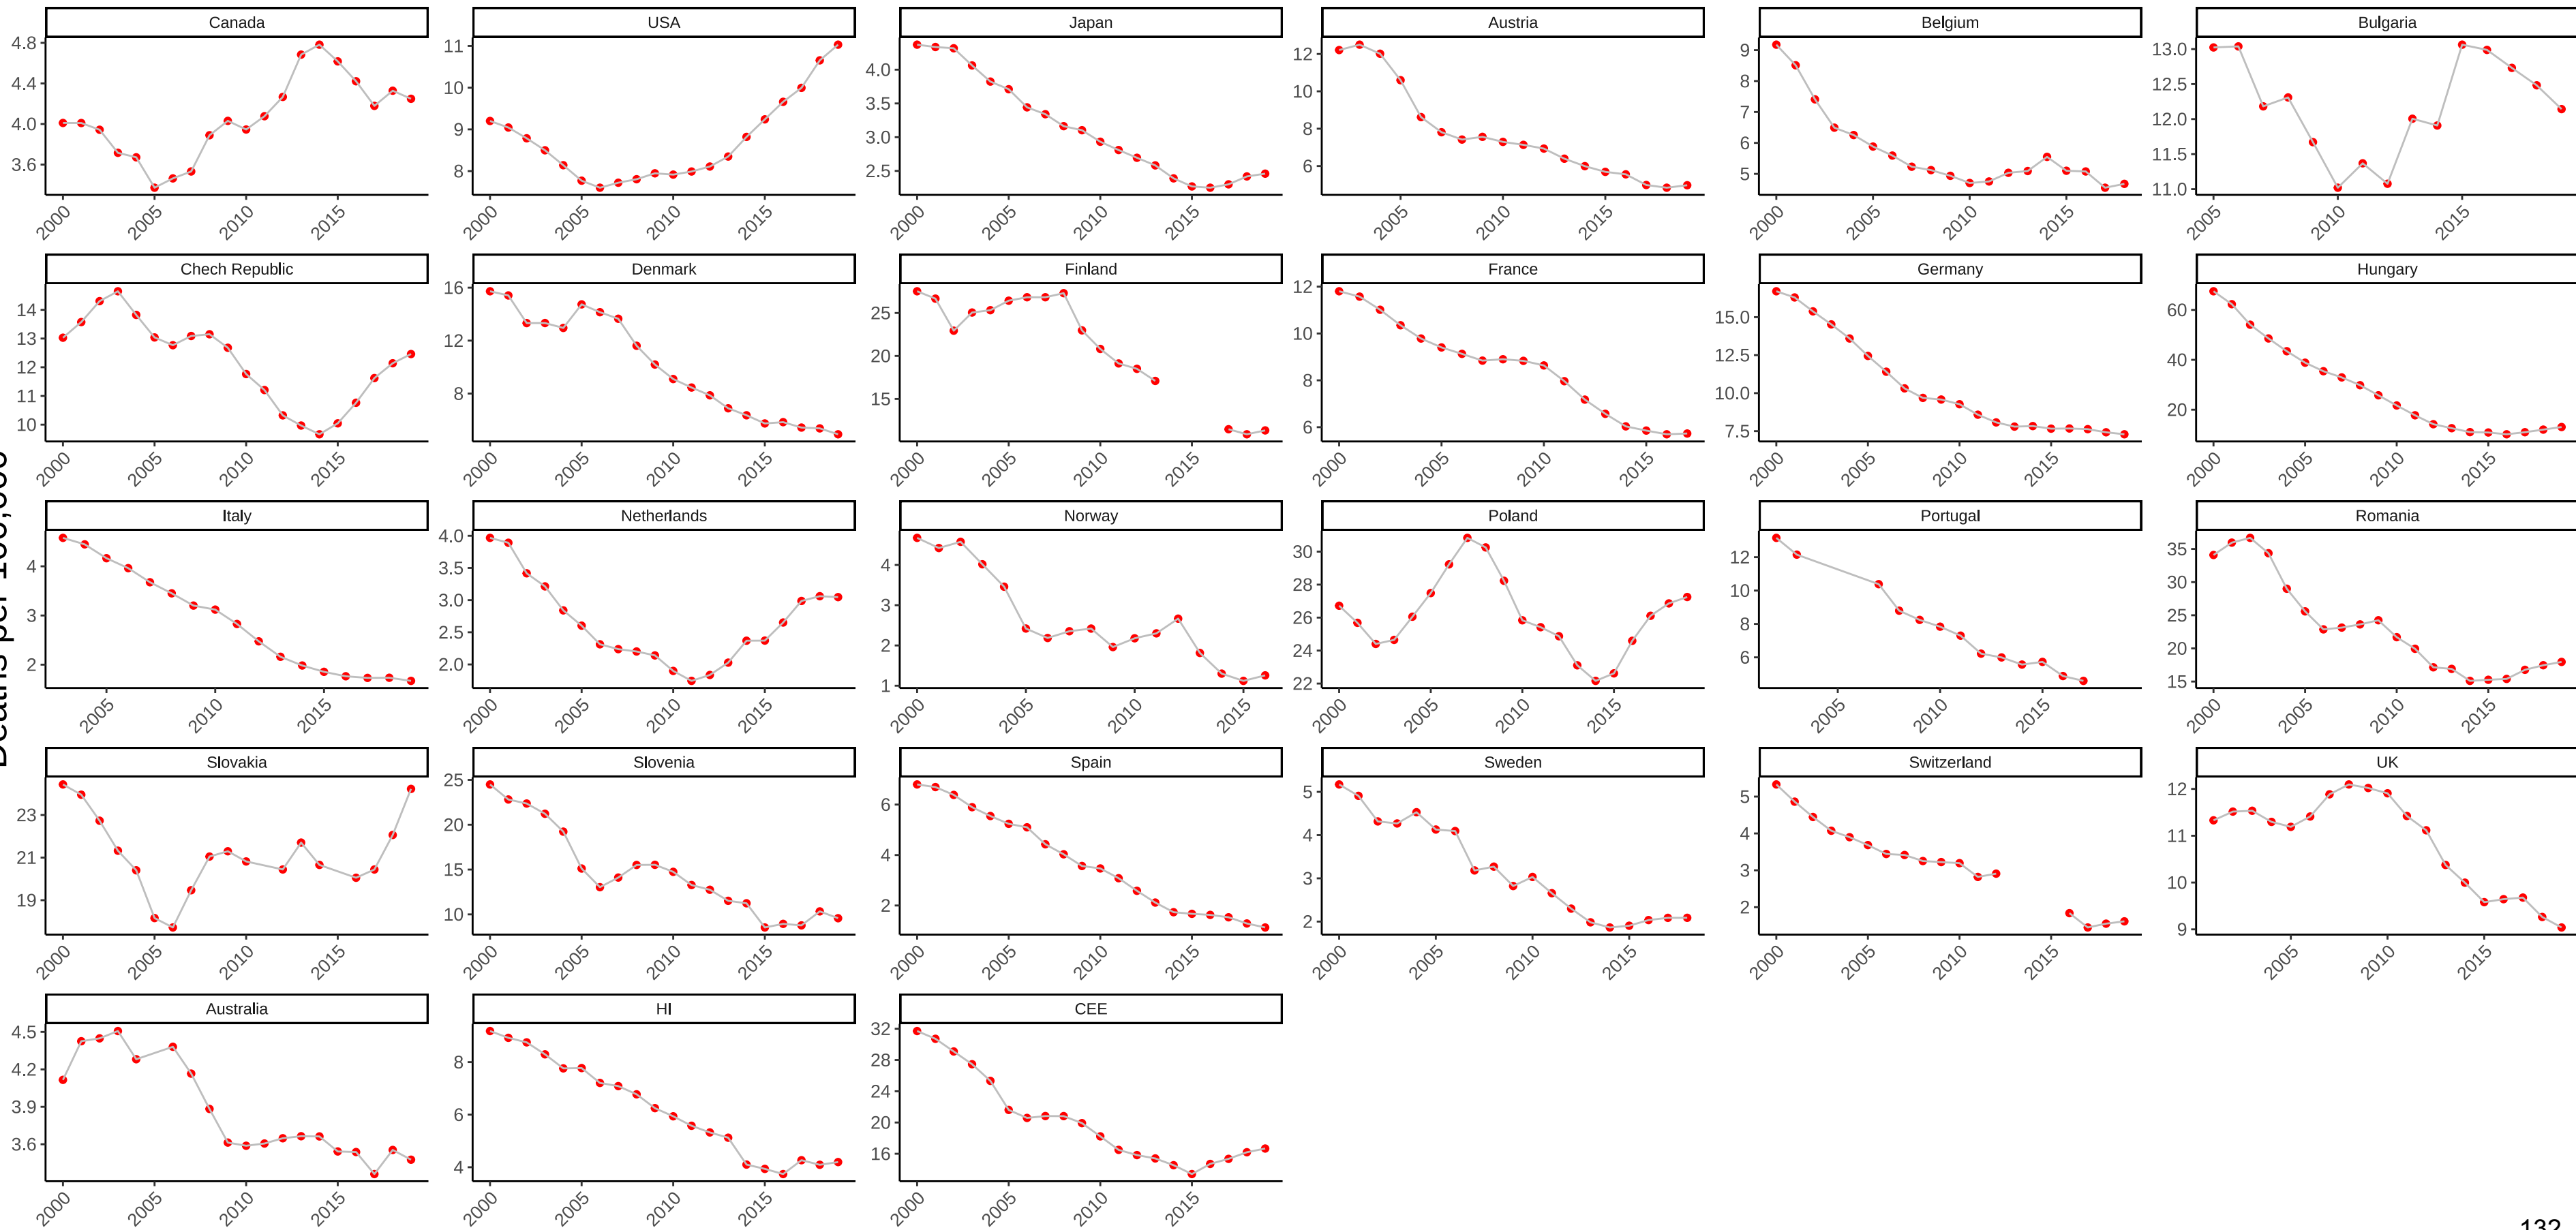

**Figure S126. Three-Year Moving Average of Female Mortality from Alcohol-Related Causes at Ages 25-44**

Deaths per 100,000

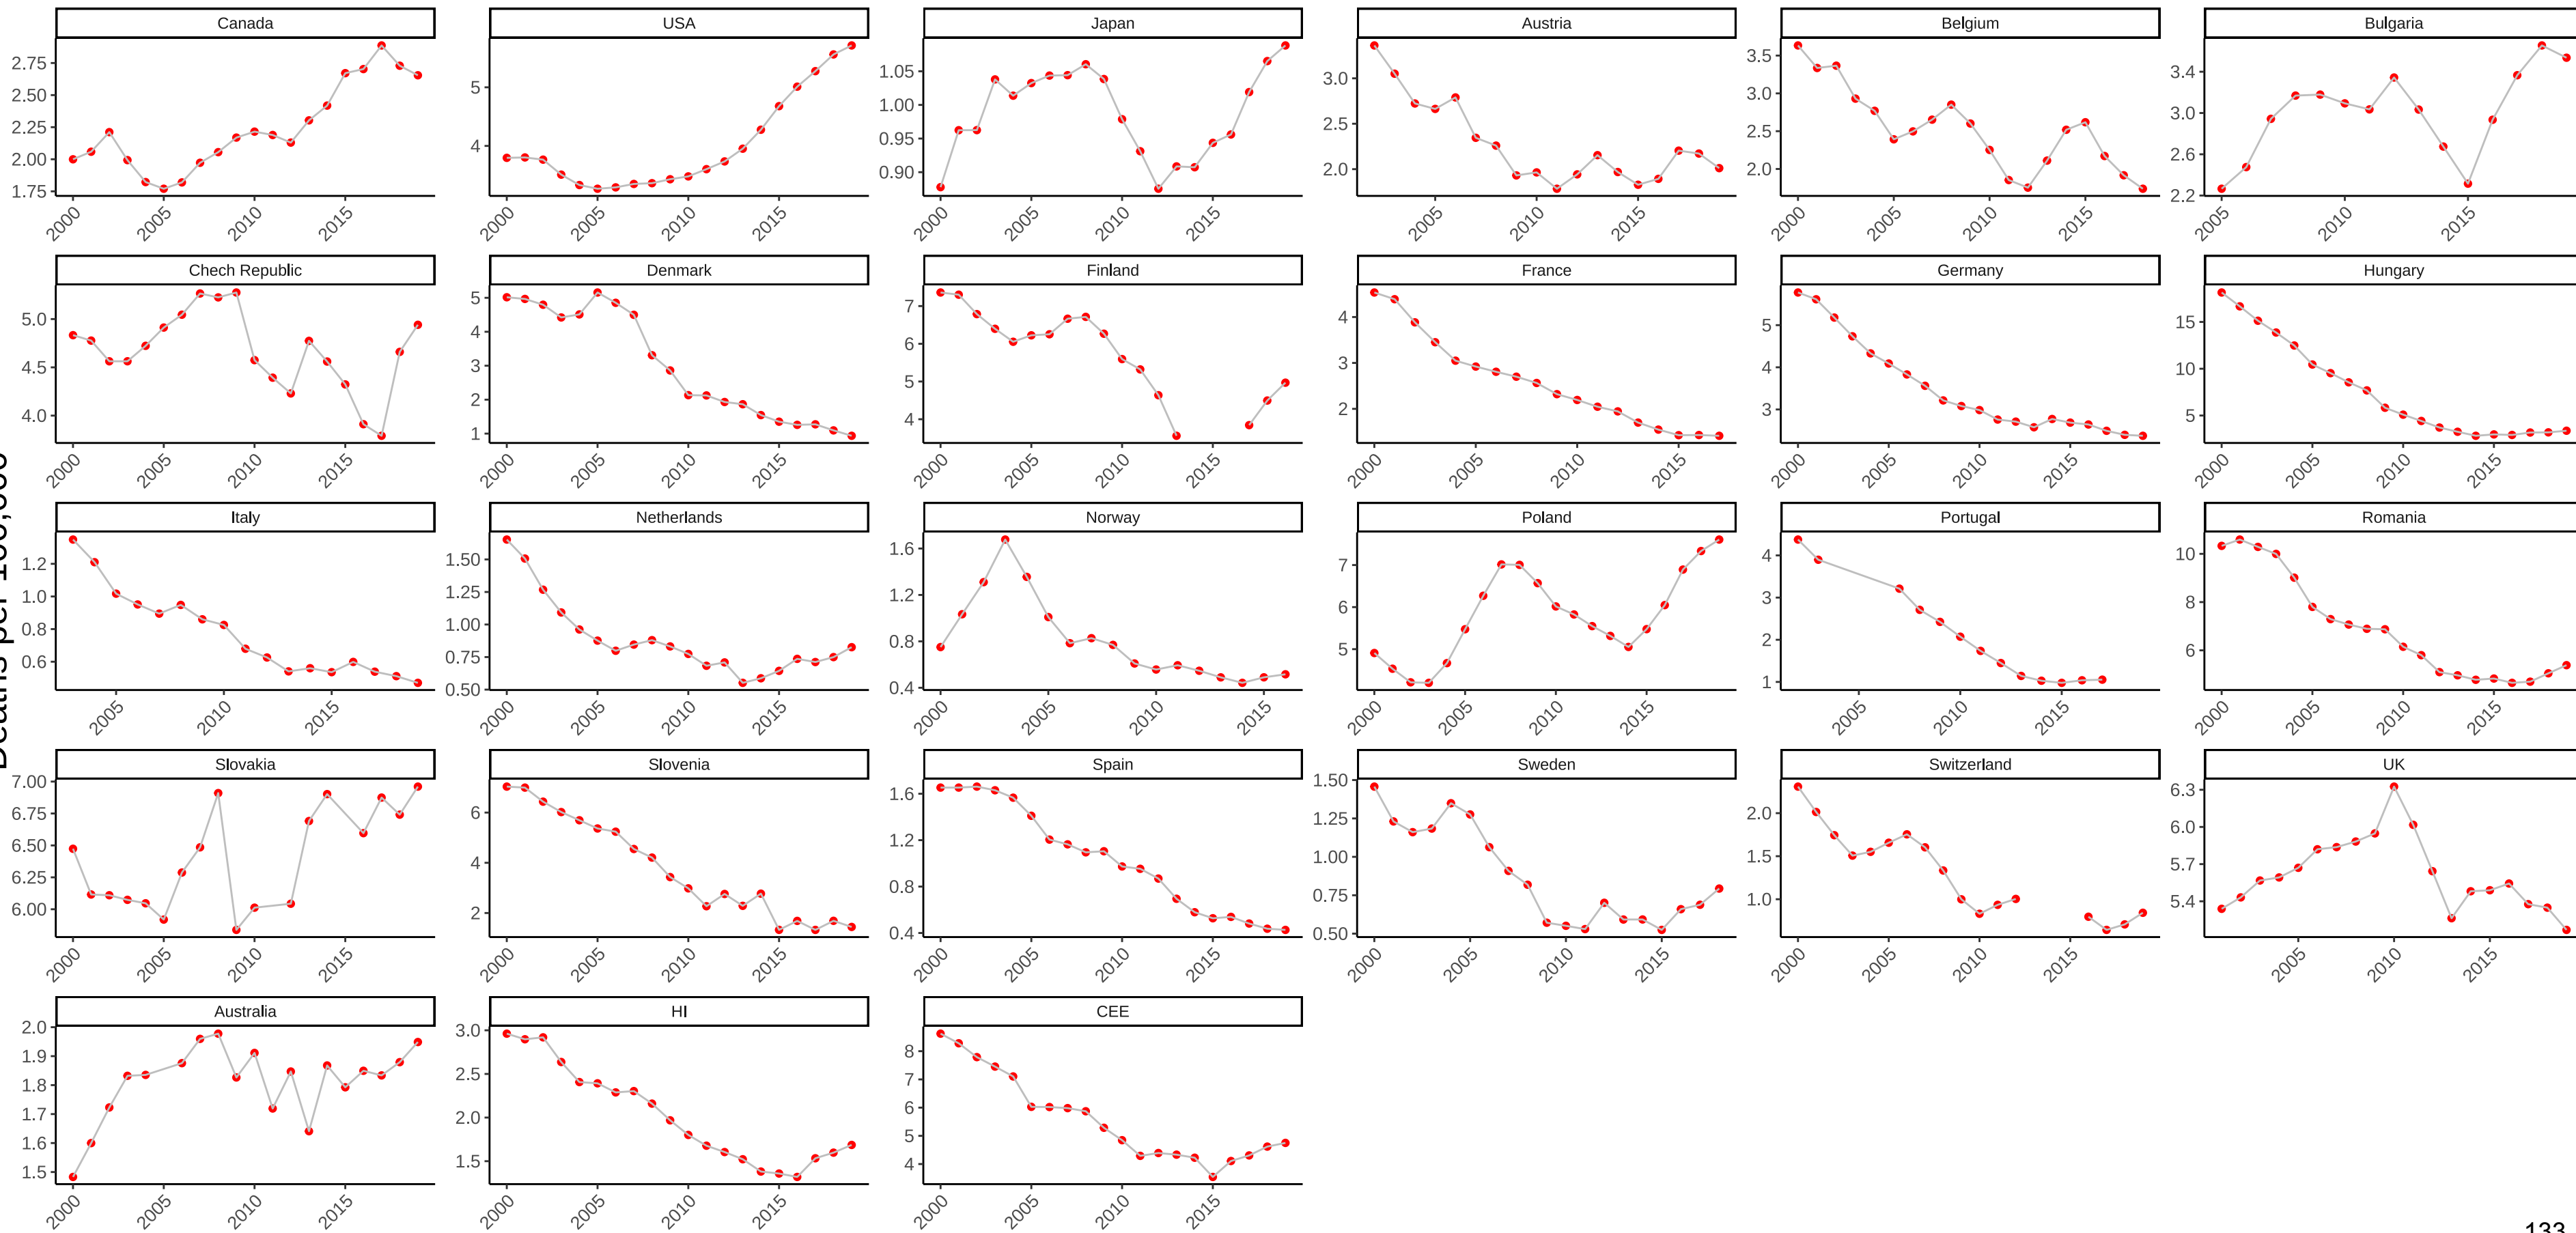

Year

**Figure S127. Three-Year Moving Average of Male Mortality from Drug-Related Causes at Ages 45-54**

Deaths per 100,000

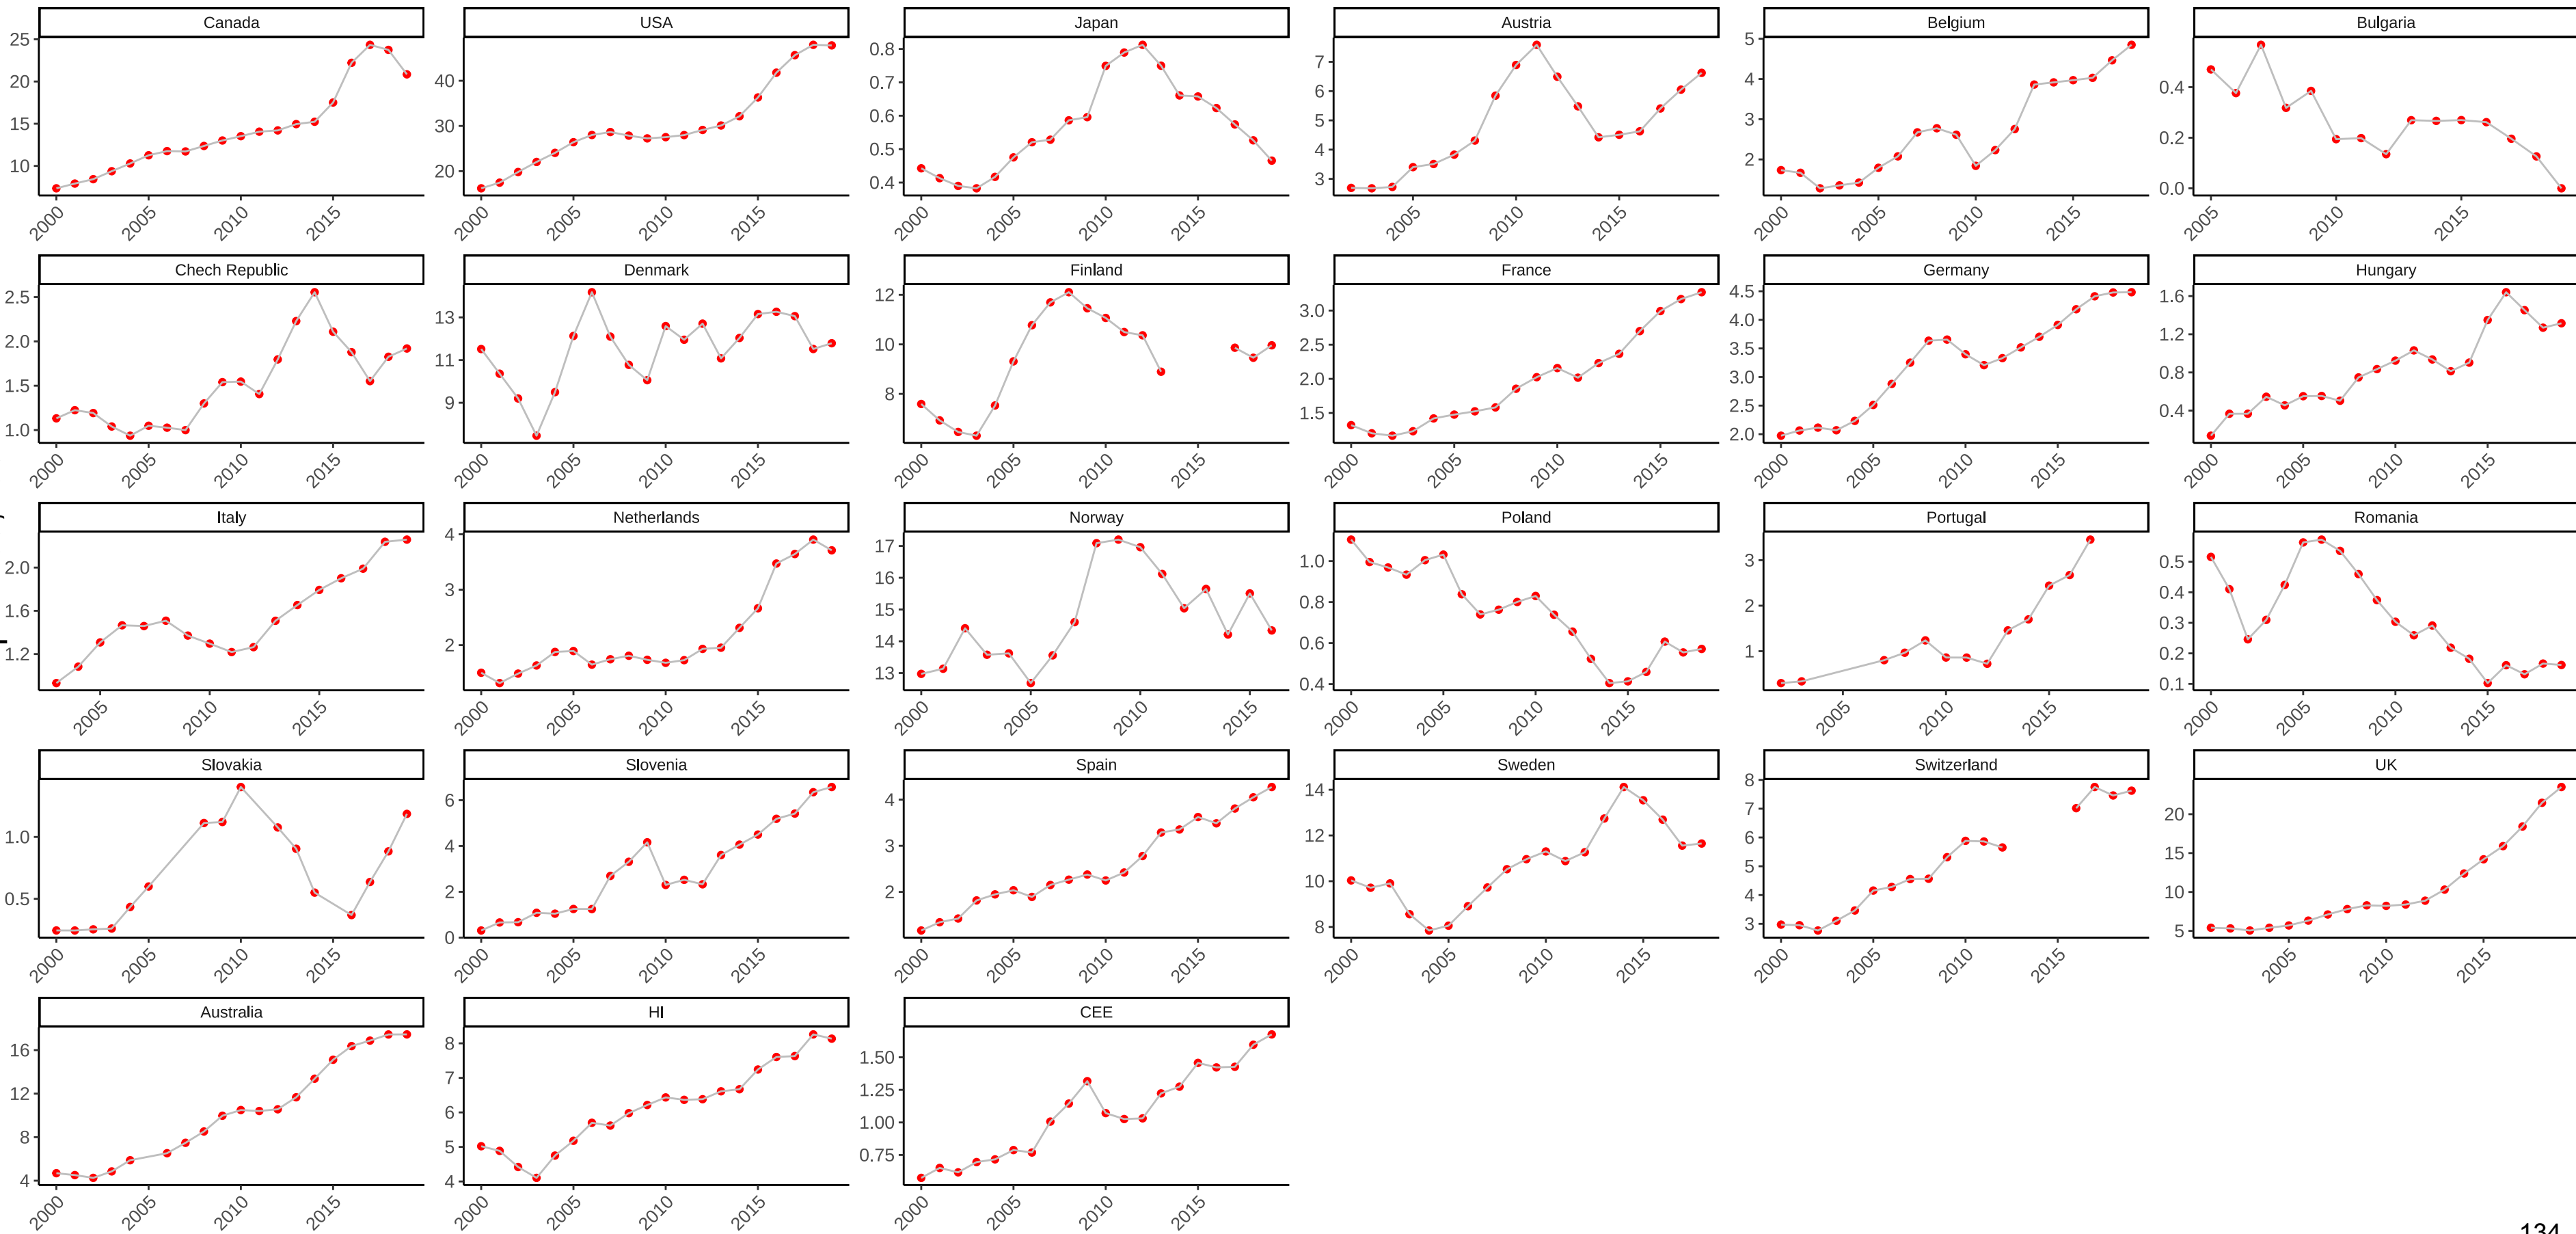

Year

**Figure S128. Three-Year Moving Average of Female Mortality from Drug-Related Causes at Ages 45-54**

Deaths per 100,000

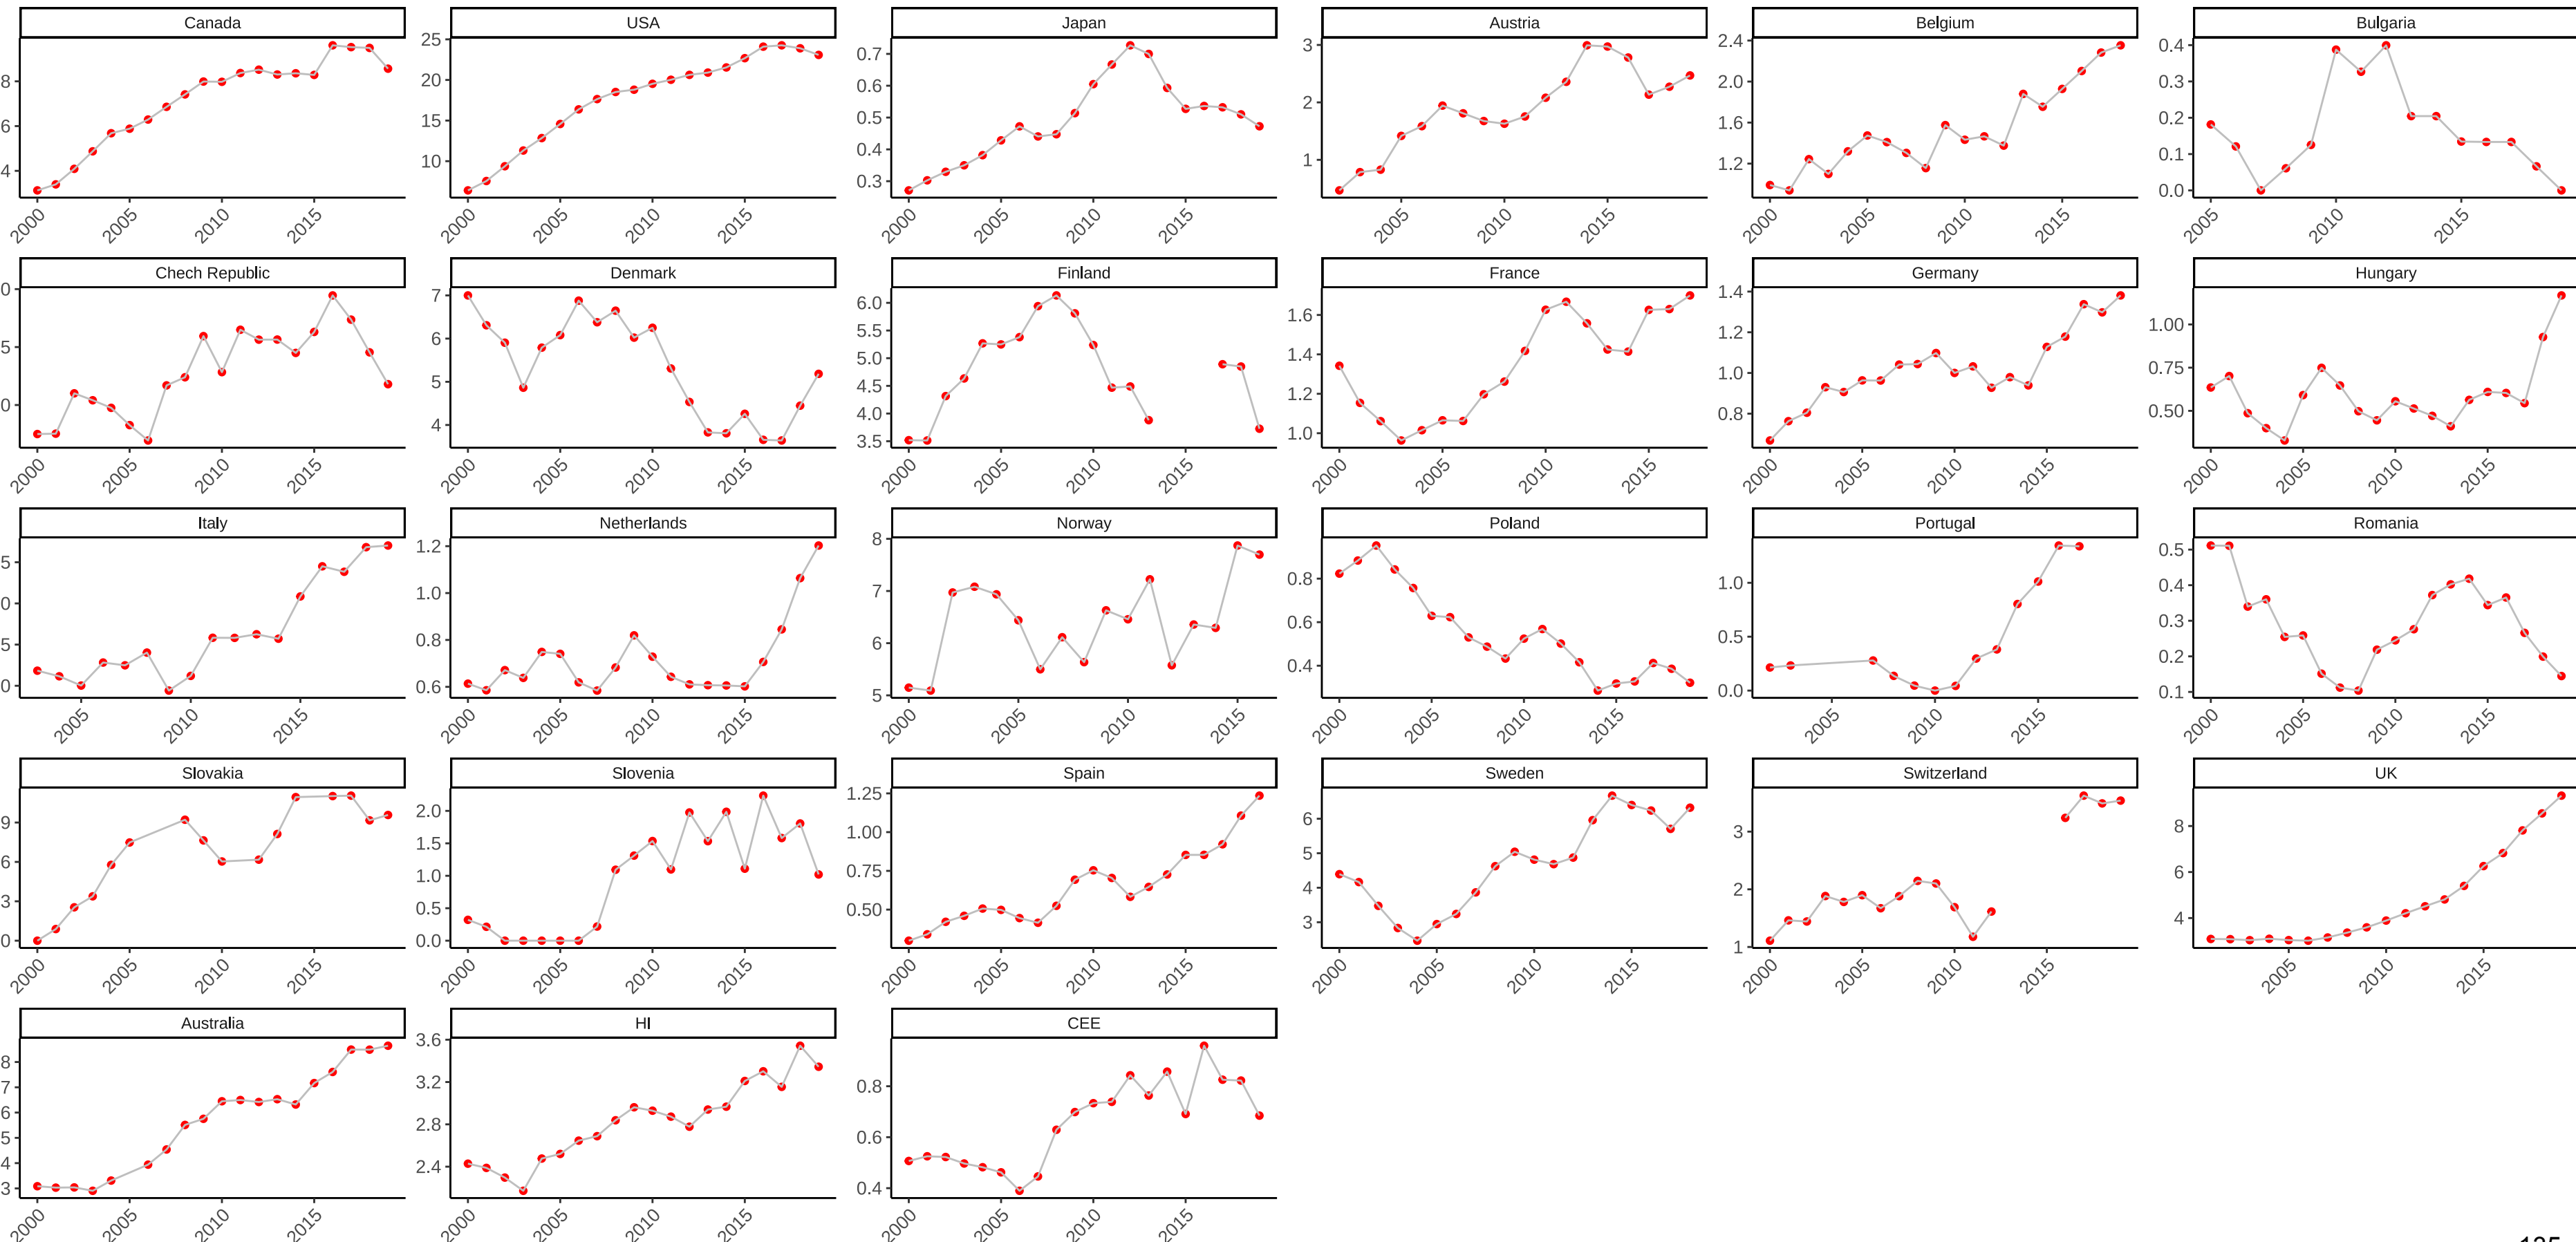

Year

Figure S129. Three-Year Moving Average of Male Mortality from Alcohol-Related Causes at Ages 45-54

Deaths per 100,000

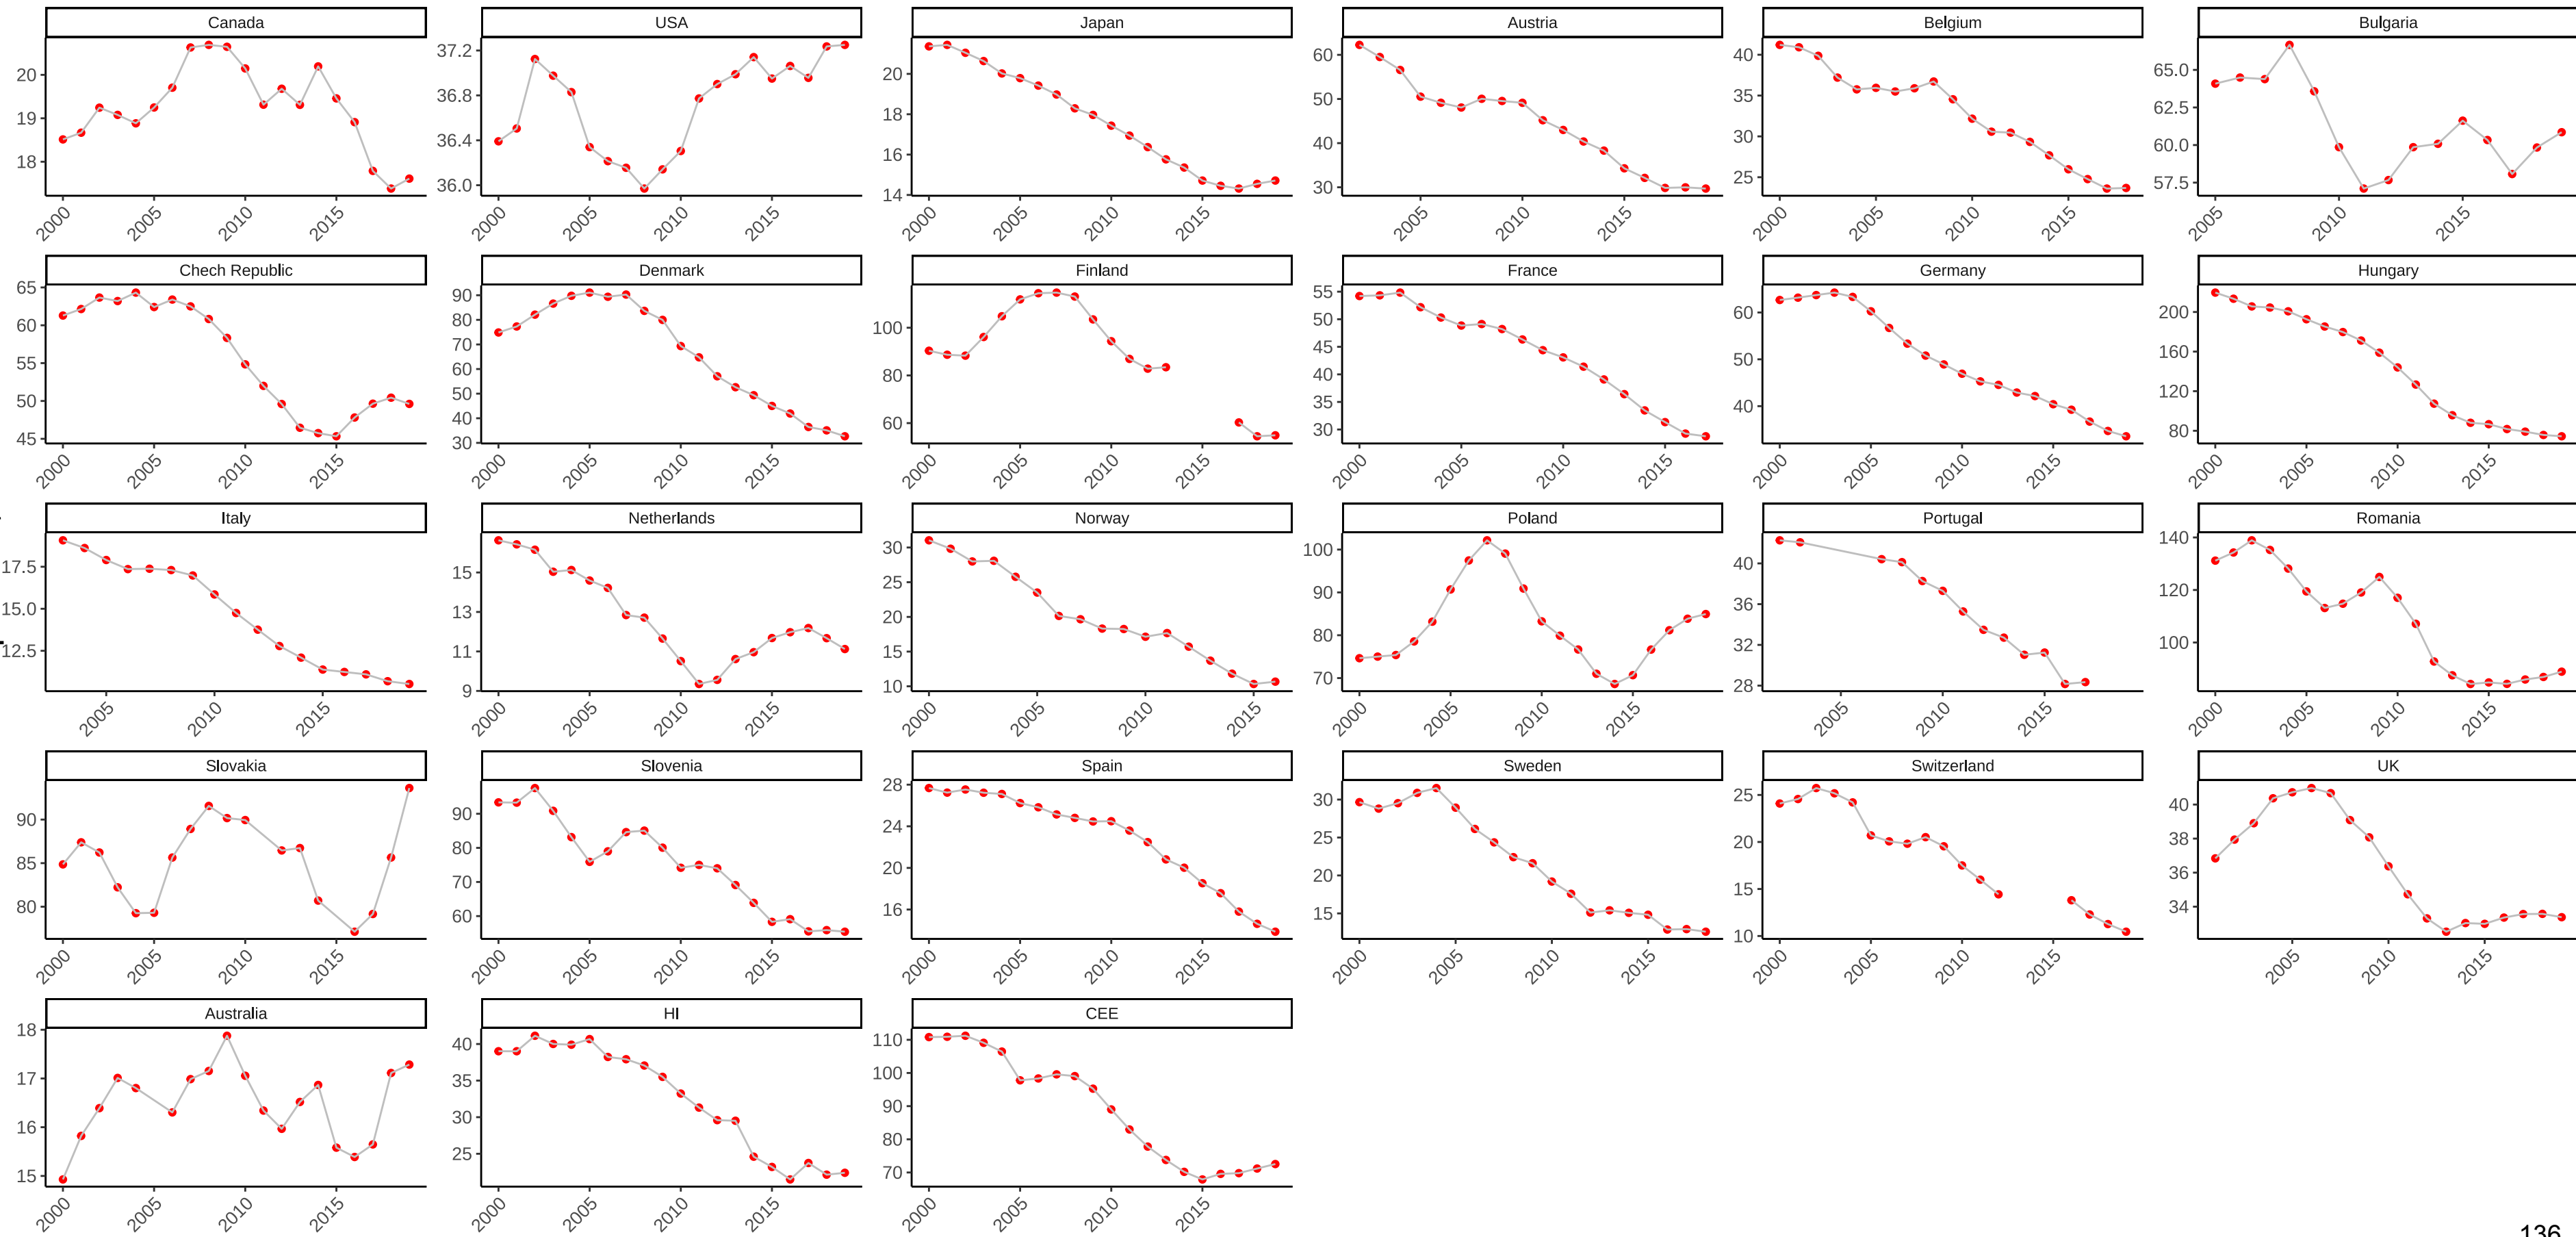

Year

**Figure S130. Three-Year Moving Average of Female Mortality from Alcohol-Related Causes at Ages 45-54**

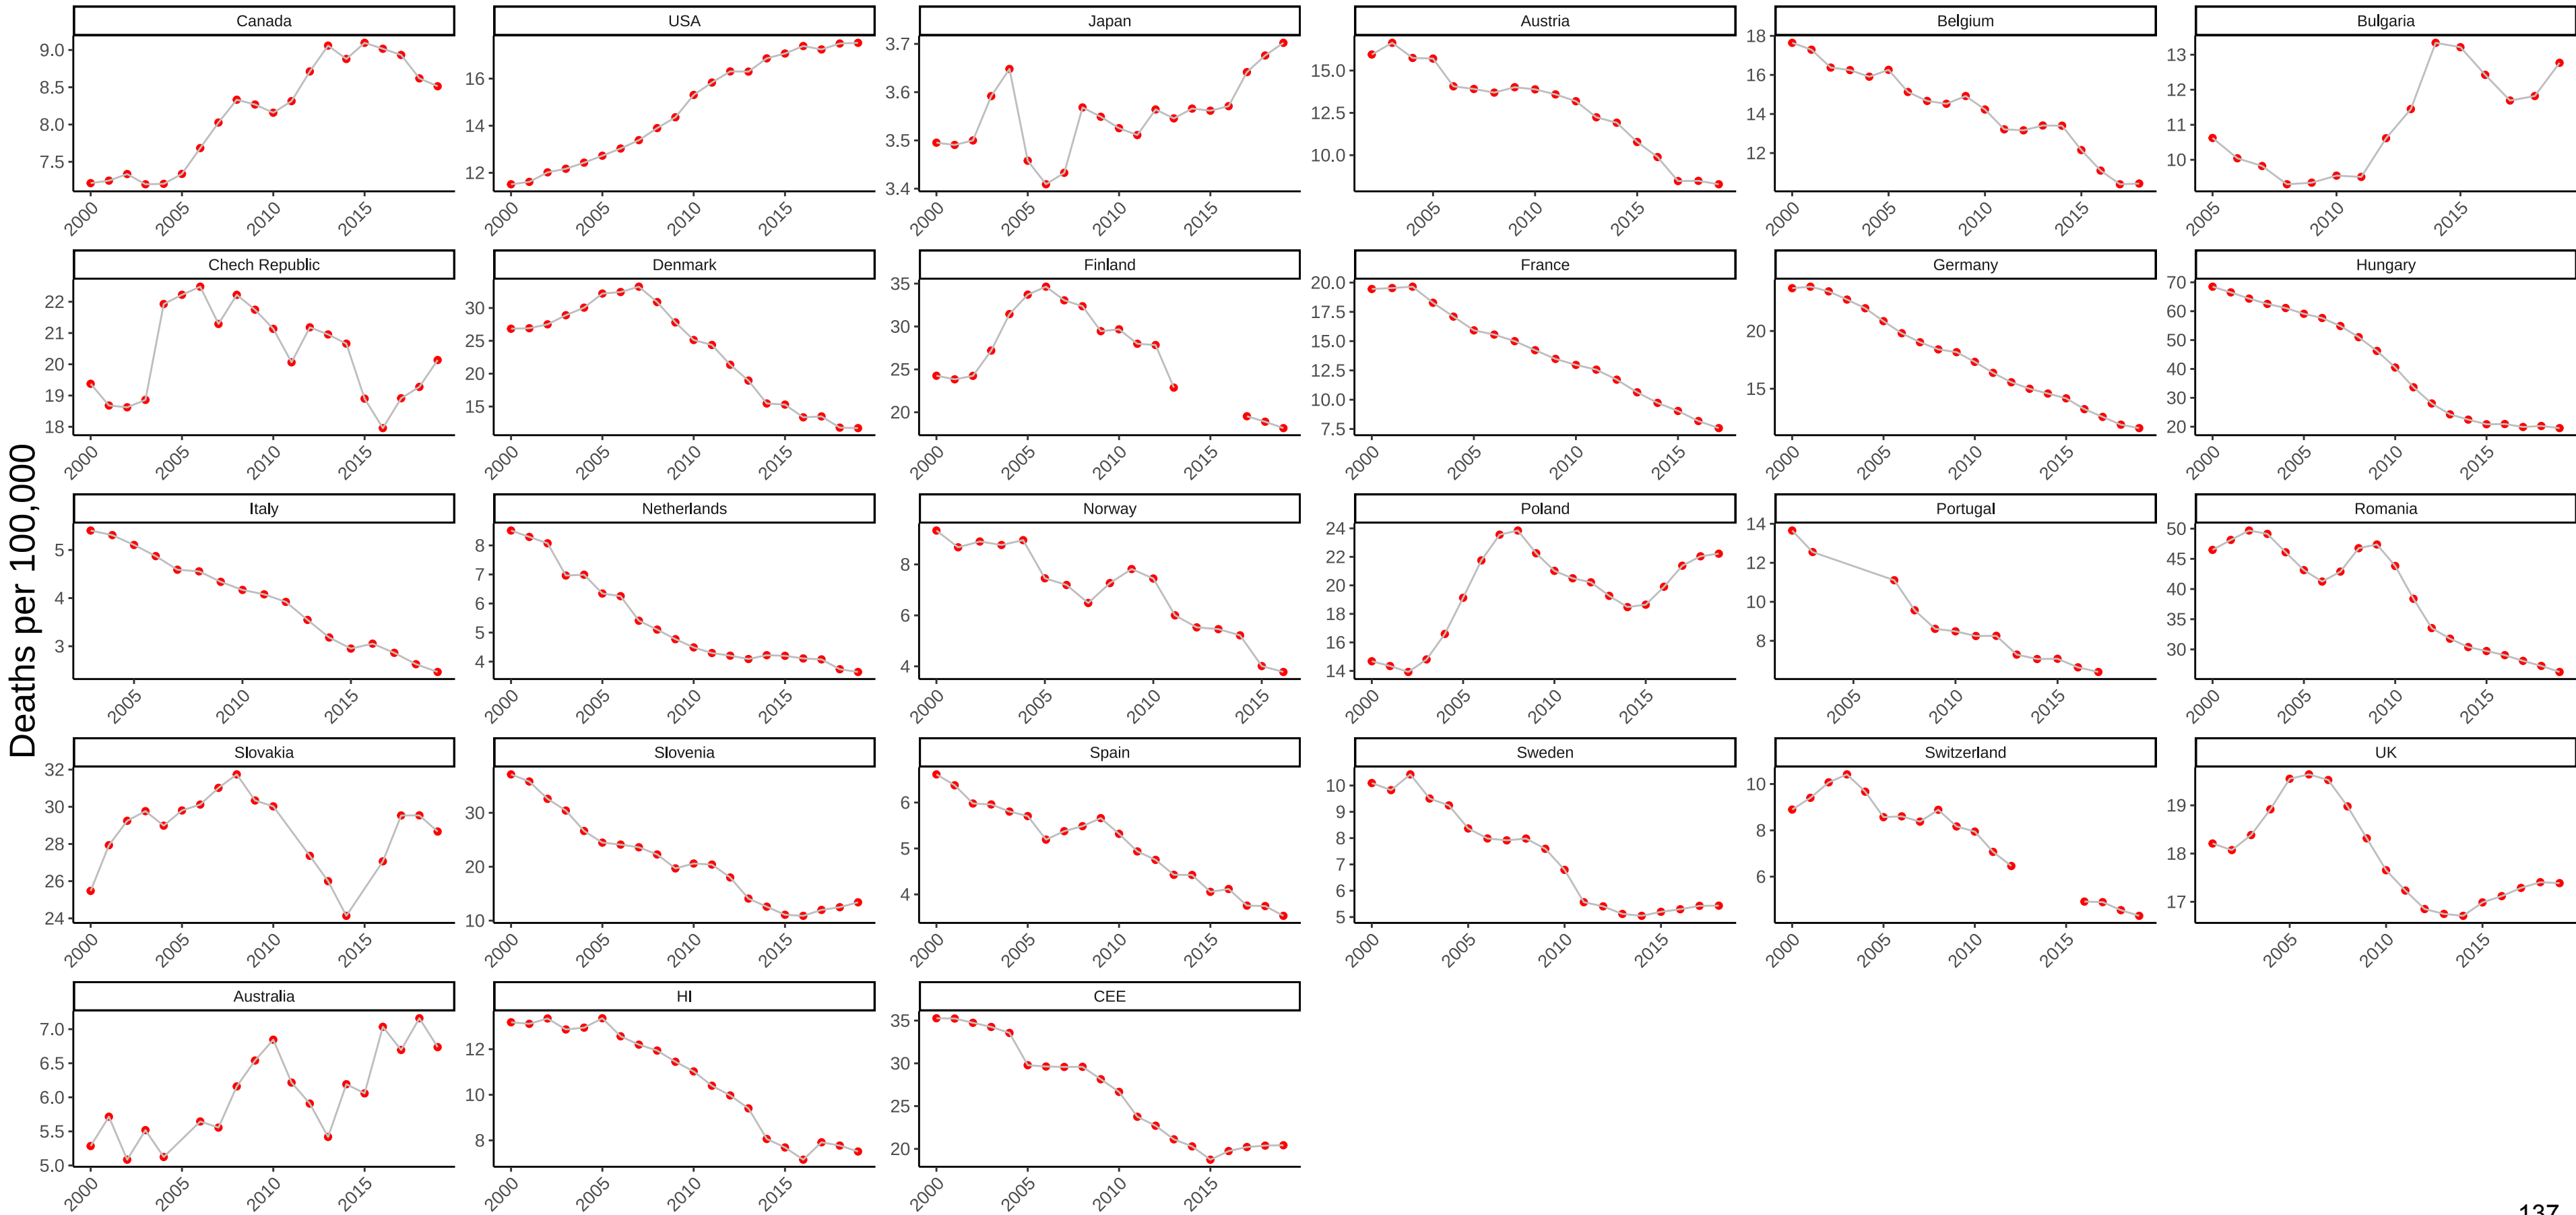

**Figure S131. Three-Year Moving Average of Male Mortality from Drug-Related Causes at Ages 55-64**

Deaths per 100,000

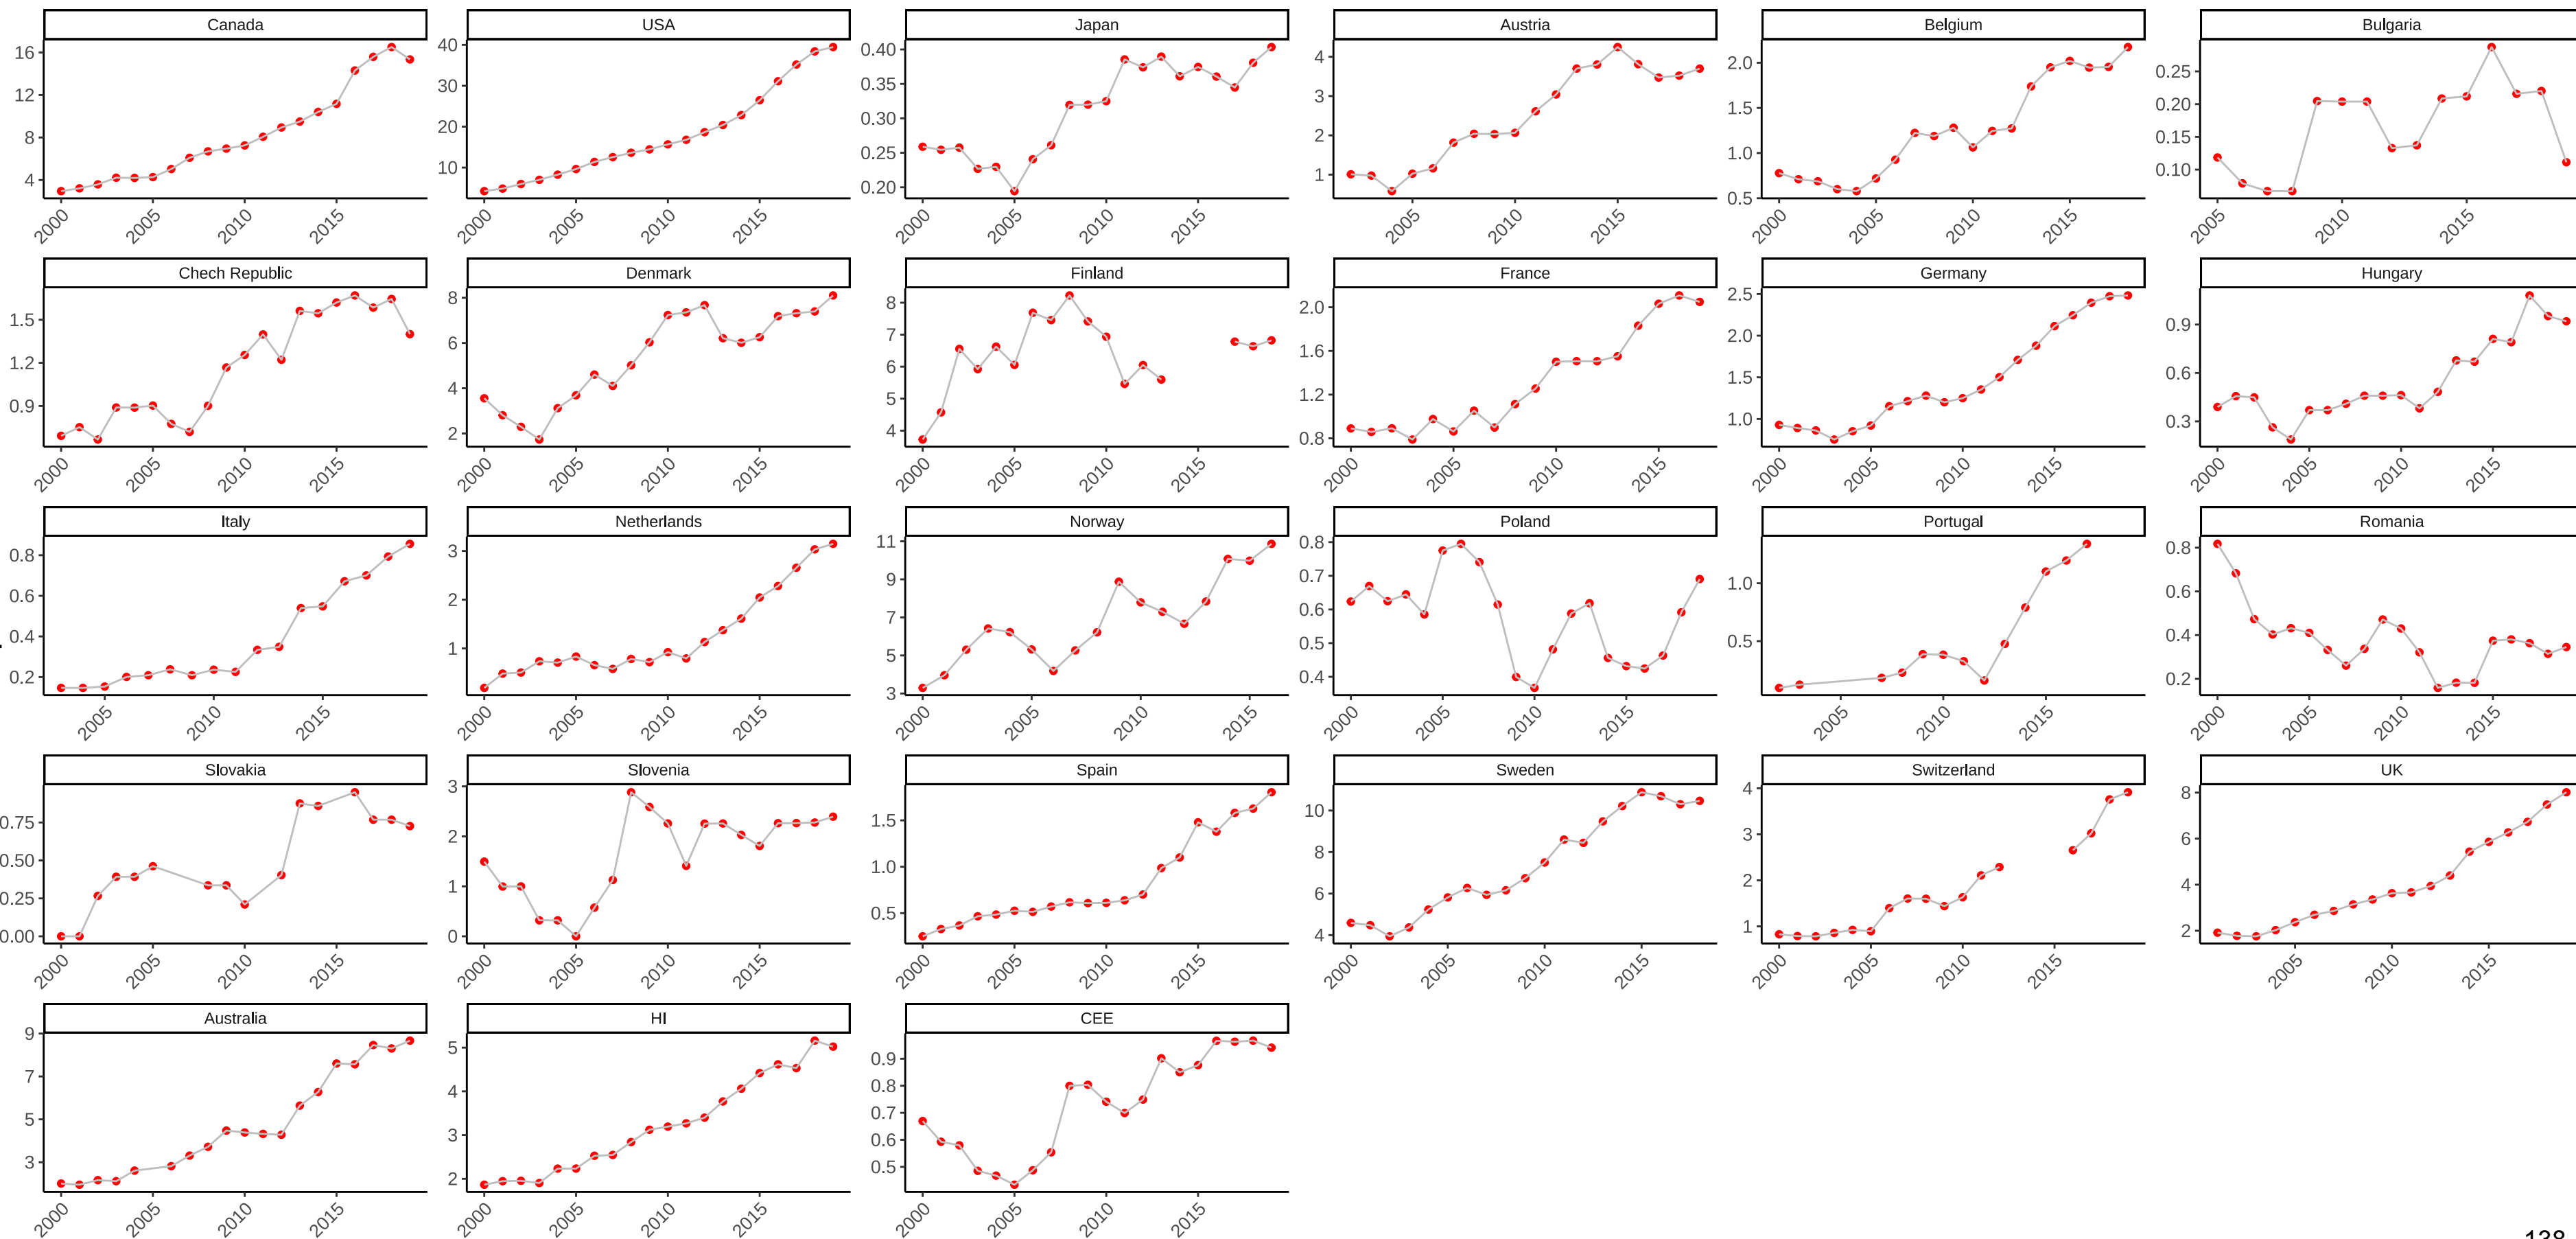

Year

**Figure S132. Three-Year Moving Average of Female Mortality from Drug-Related Causes at Ages 55-64**

Deaths per 100,000

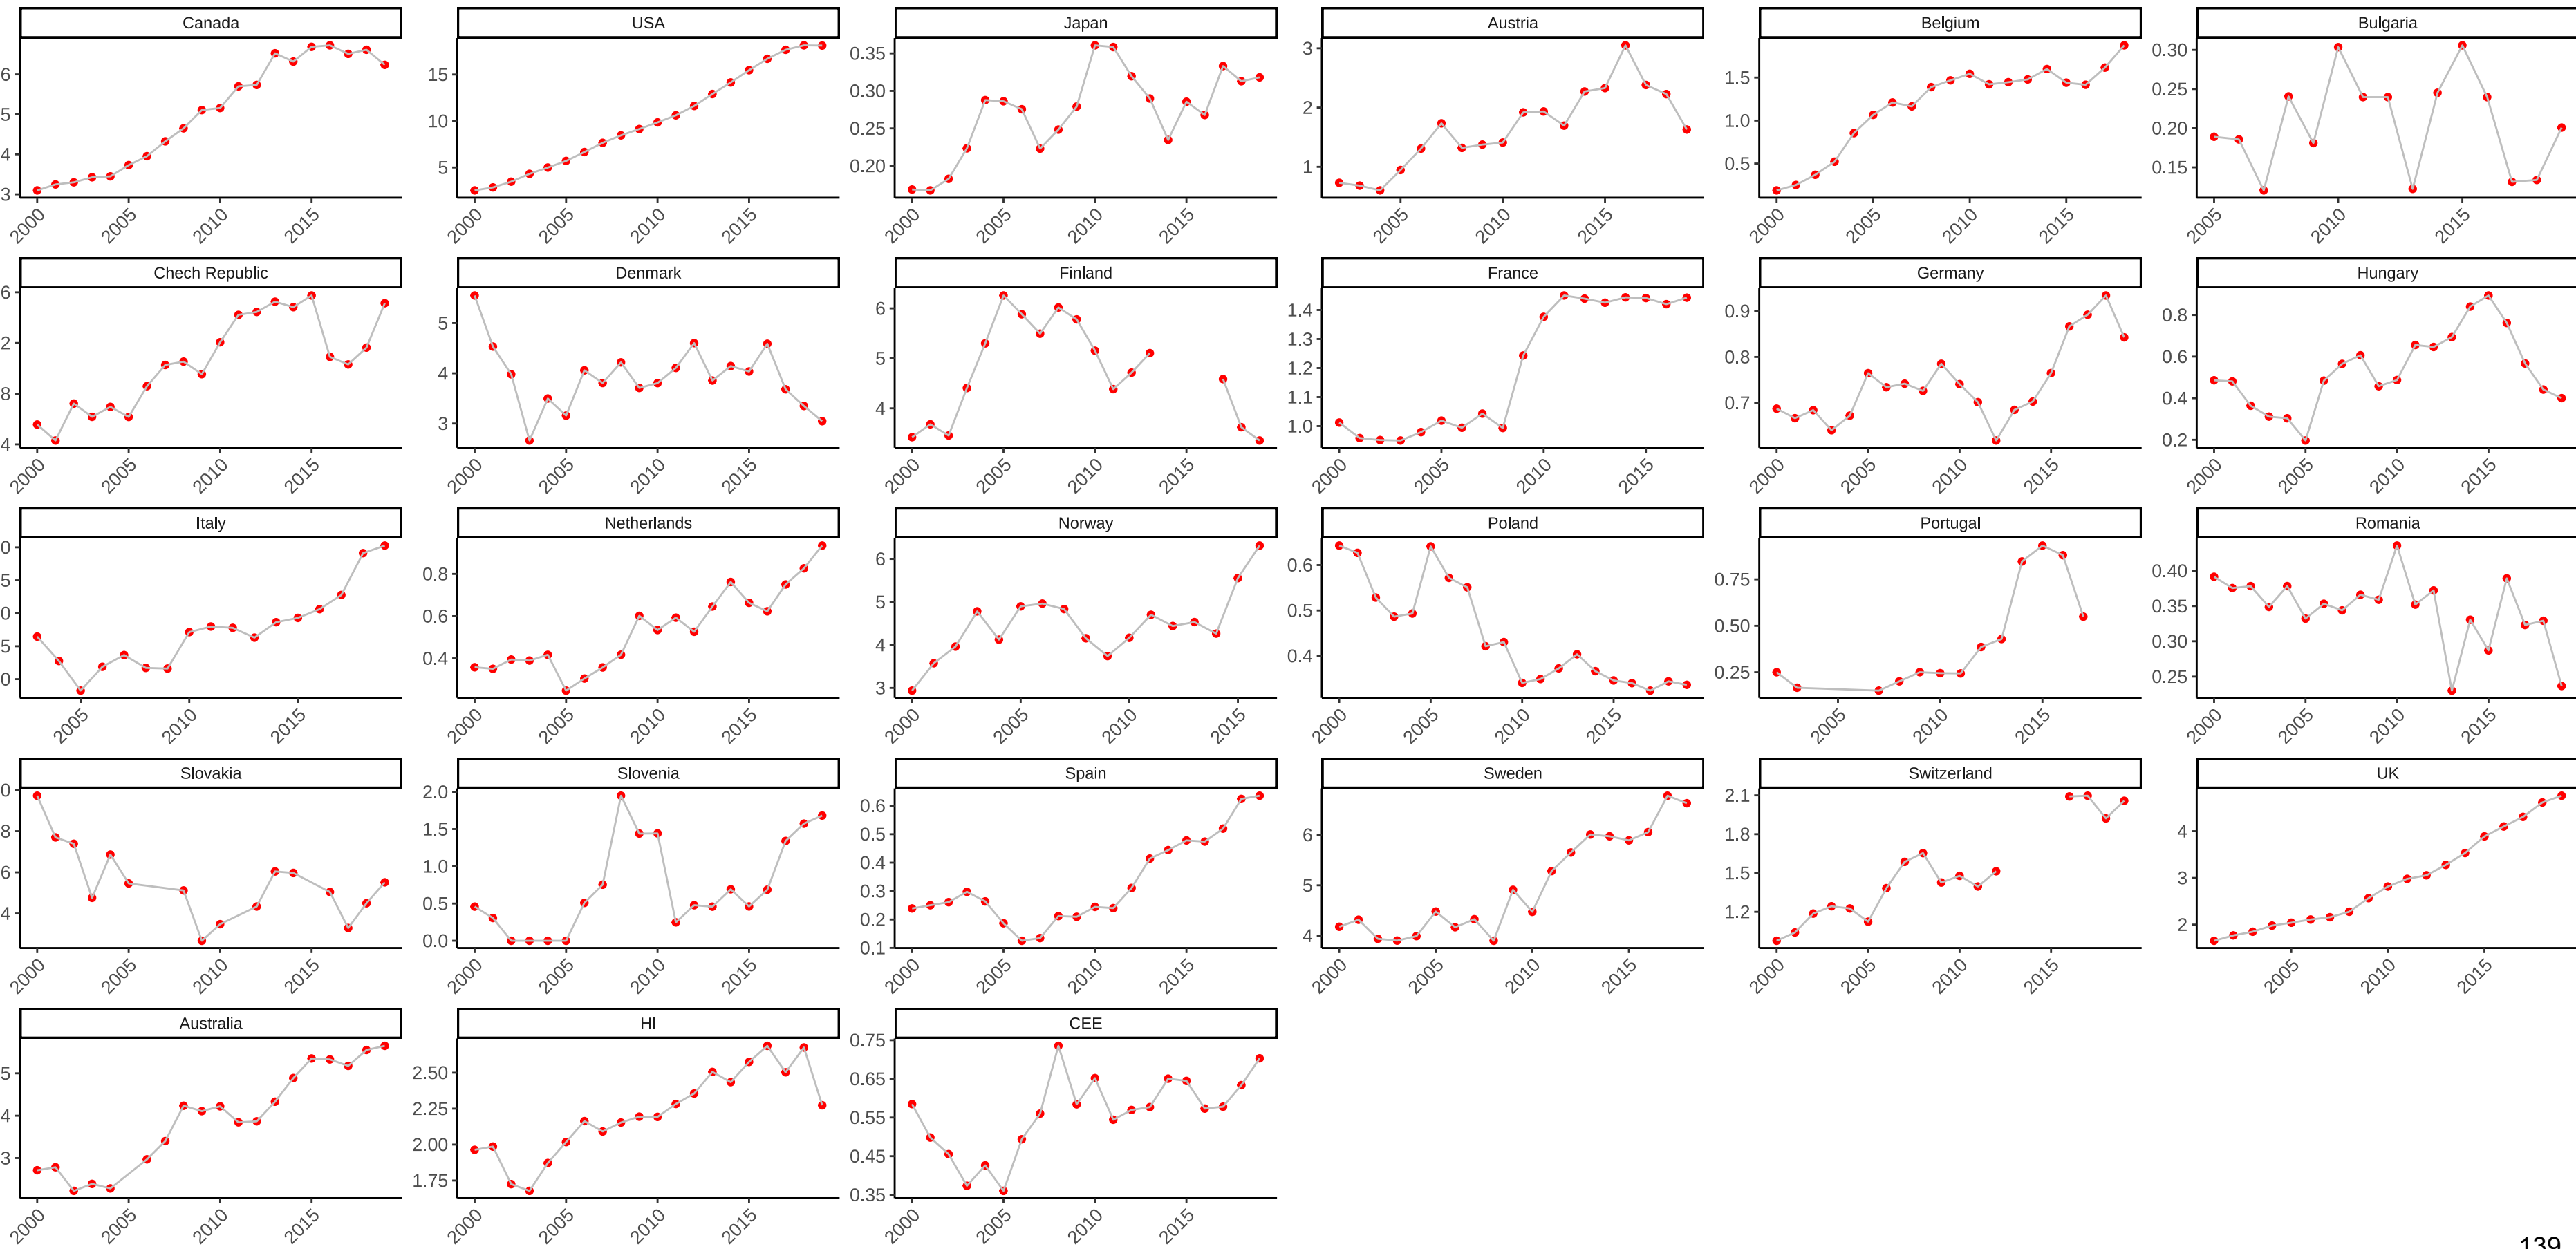

Year

**Figure S133. Three-Year Moving Average of Male Mortality from Alcohol-Related Causes at Ages 55-64**

Deaths per 100,000

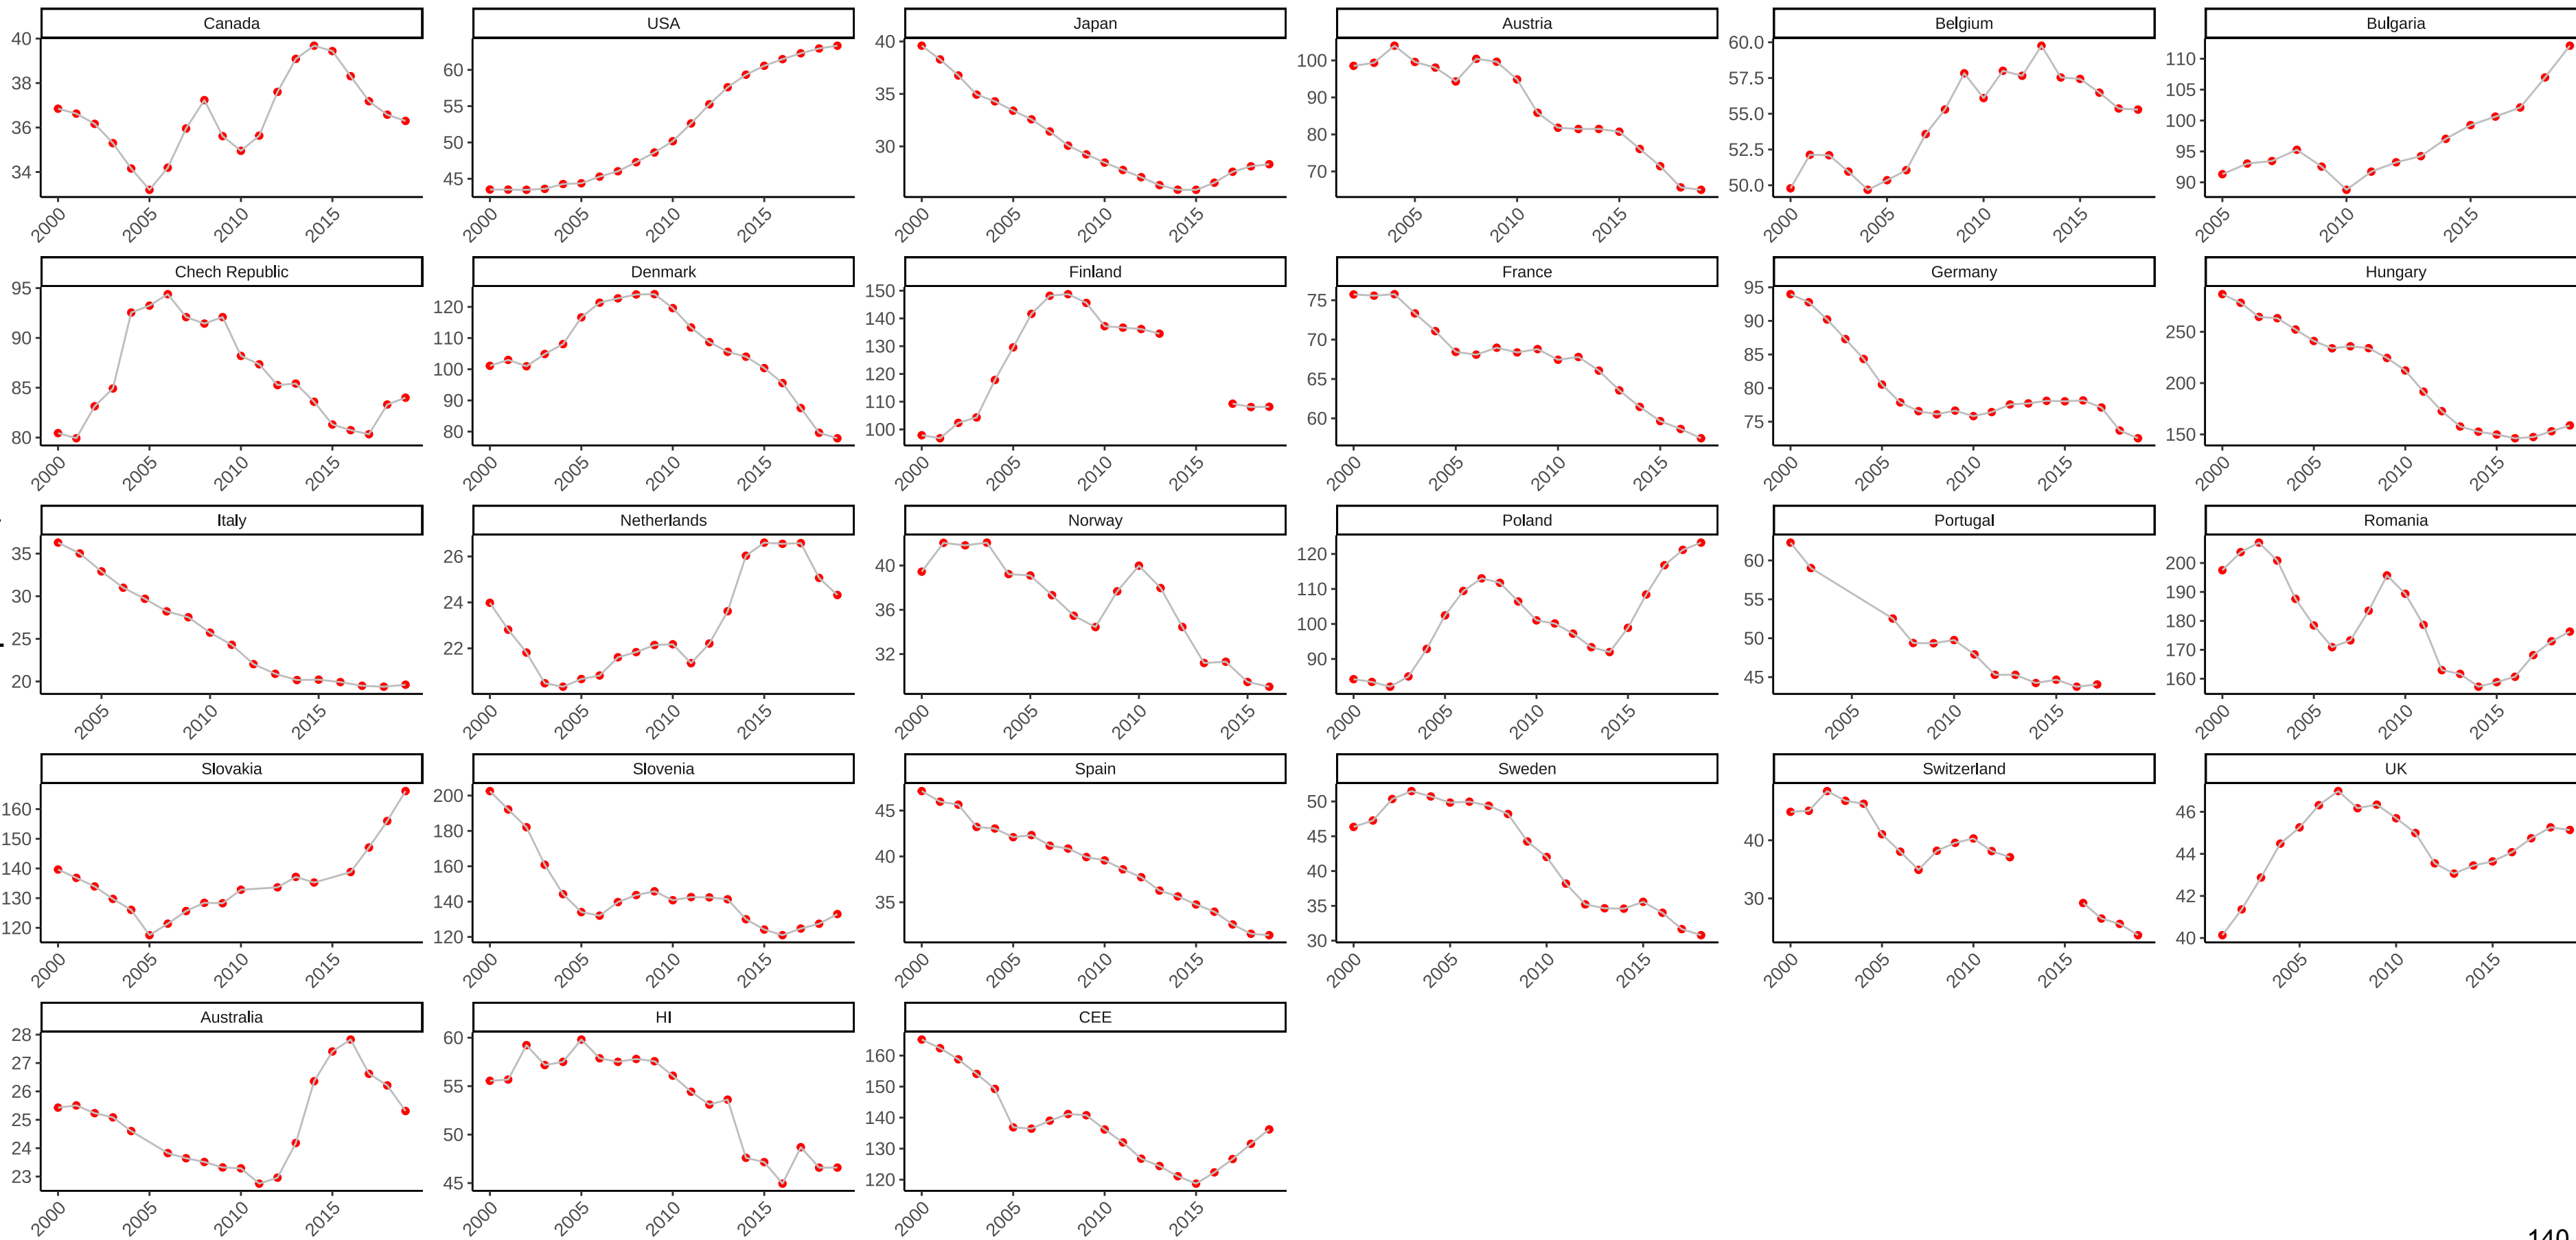

Year

**Figure S134. Three-Year Moving Average of Female Mortality from Alcohol-Related Causes at Ages 55-64**

Deaths per 100,000

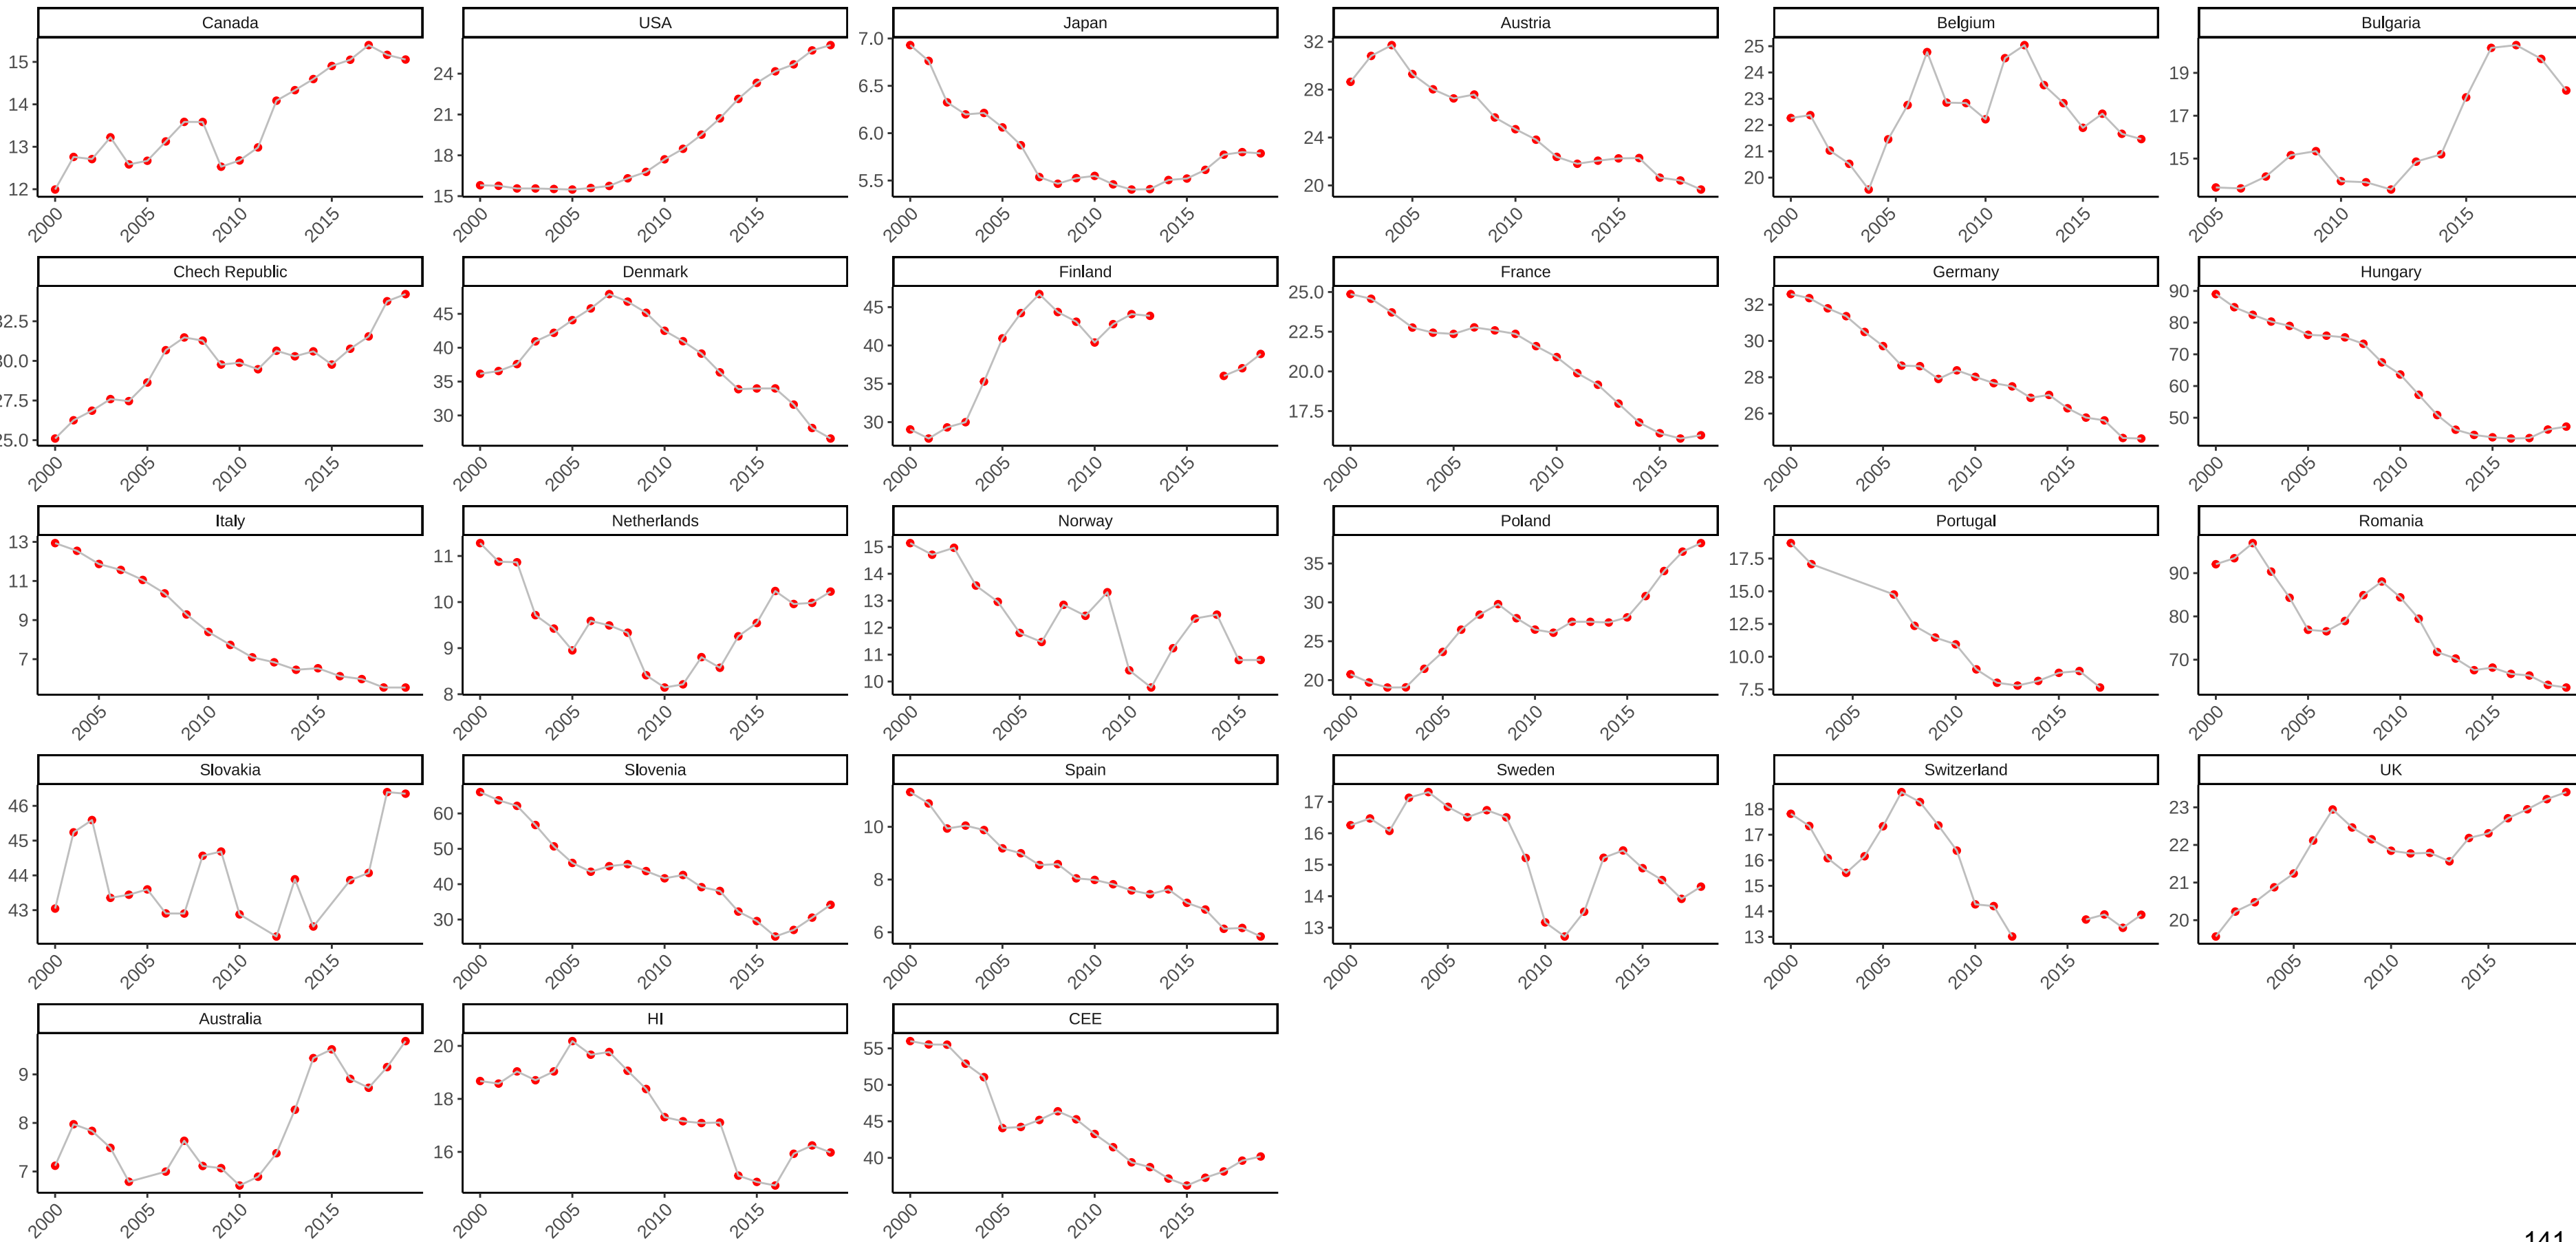

Supplement: dyae024_Supplementary_Data [file dyae024_supplementary_data.pdf]
